# Supplementary material
Source: PubMed Central journal article supplement (PMC9386497)
Supplement: mmc1.pdf [file mmc1.pdf]

## Appendix

**Figure A: Weekly observed and 95% upper/lower bounds of the expected weekly number of deaths in 47 prefectures from January 2020 through June 2021 by cause categories and by place of death.**

Blue bar indicates the observed number of deaths, black line indicates the expected number of deaths, green lines indicate the 95% upper and lower bounds of the expected number of deaths, red asterisk indicates the observed count above the upper bound, and black asterisk indicates the observed count below the upper bound.

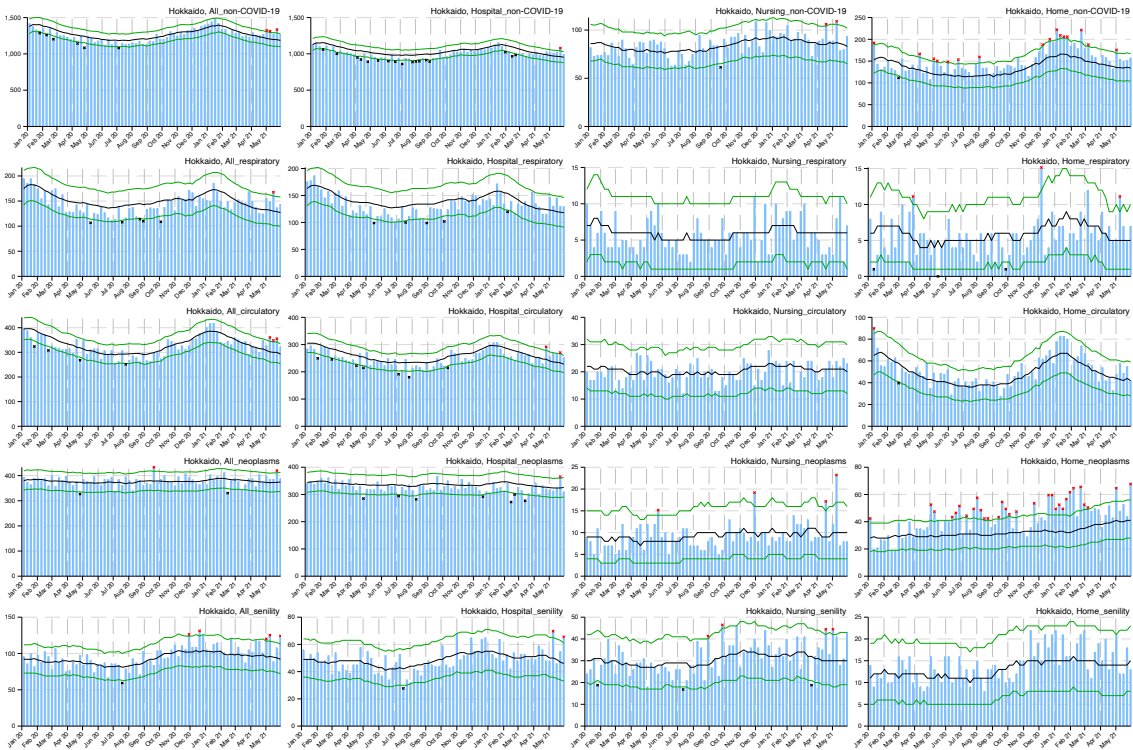

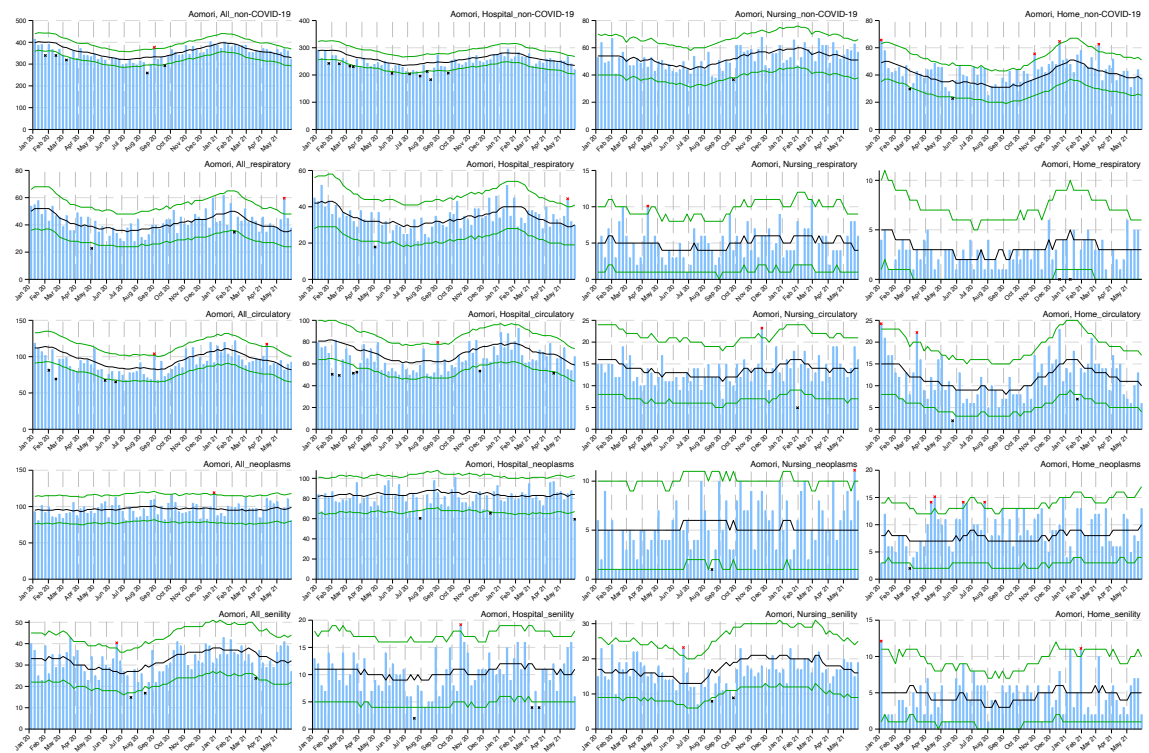

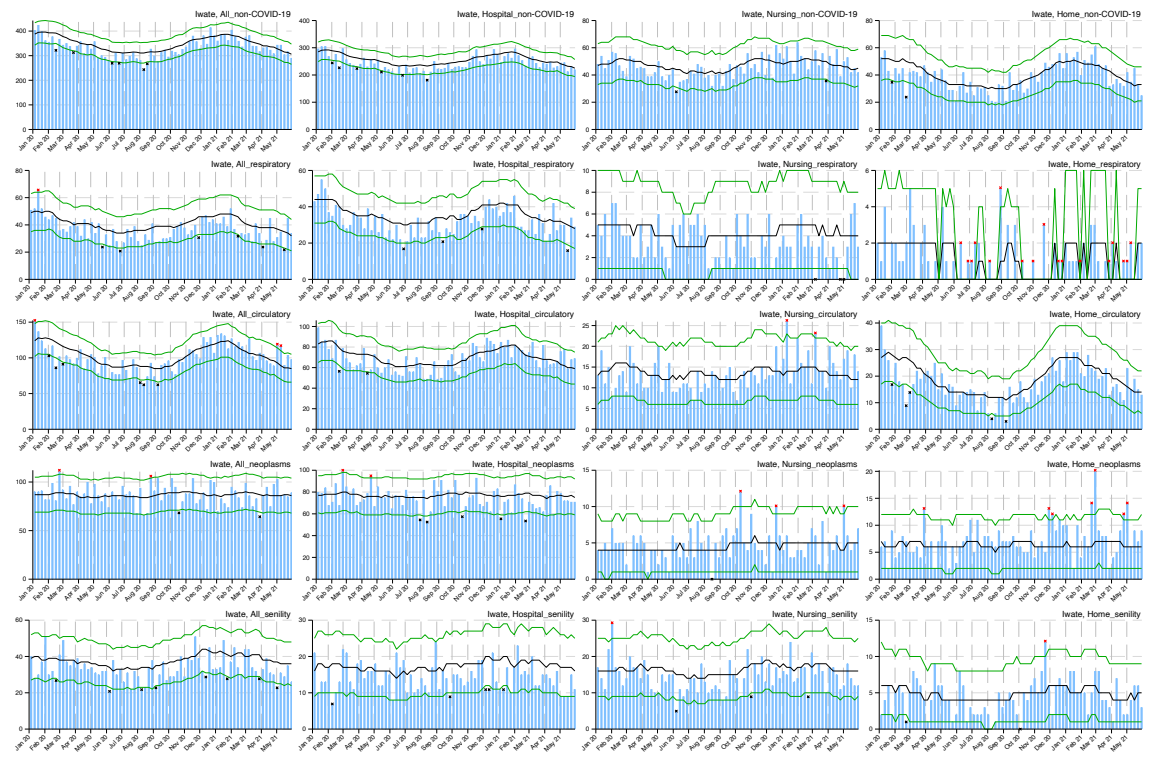



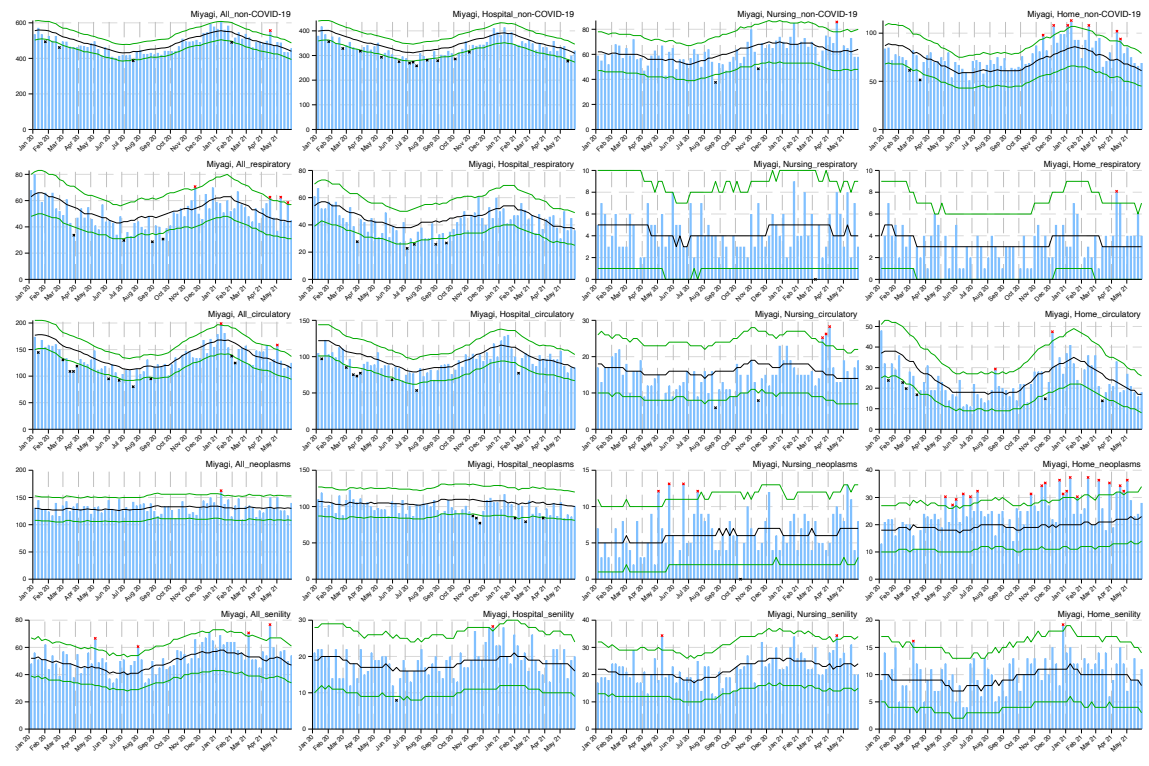

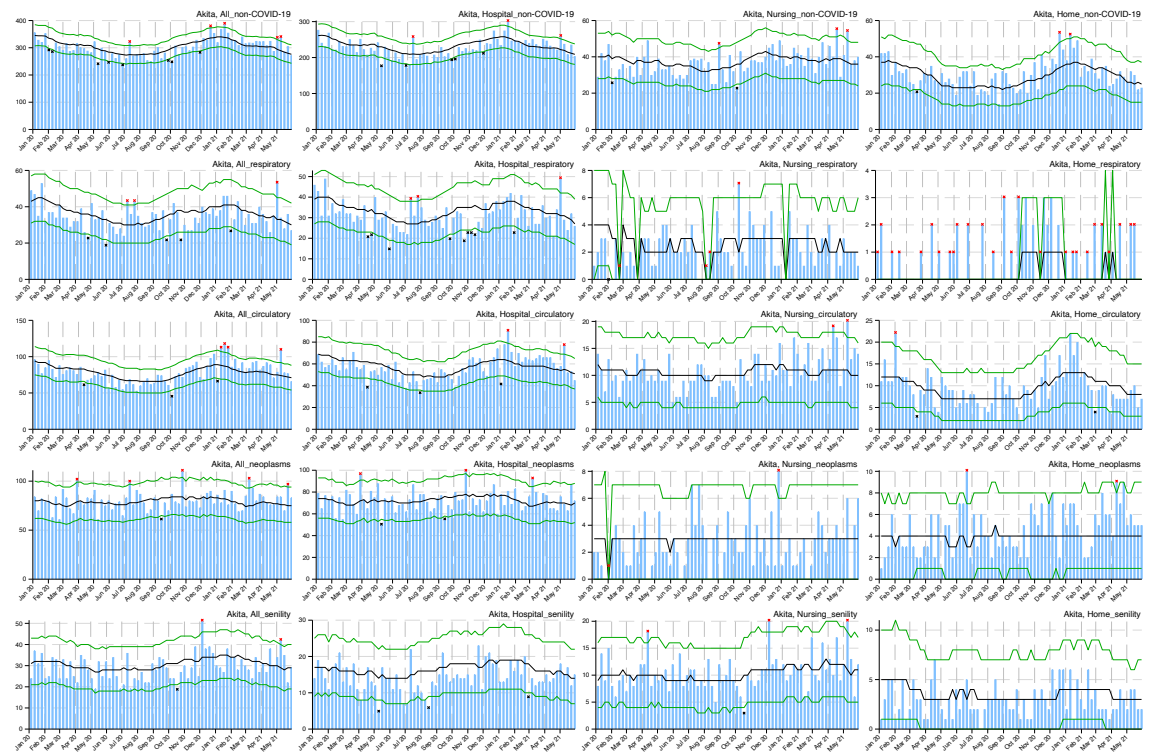

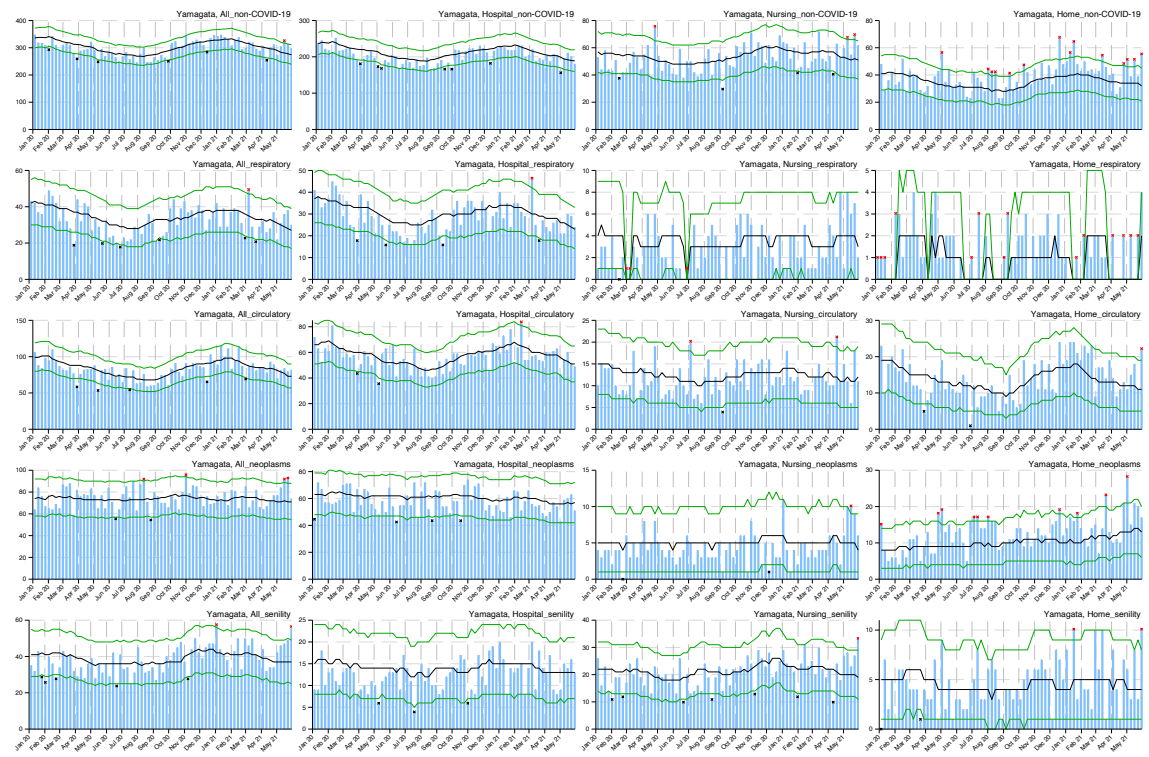

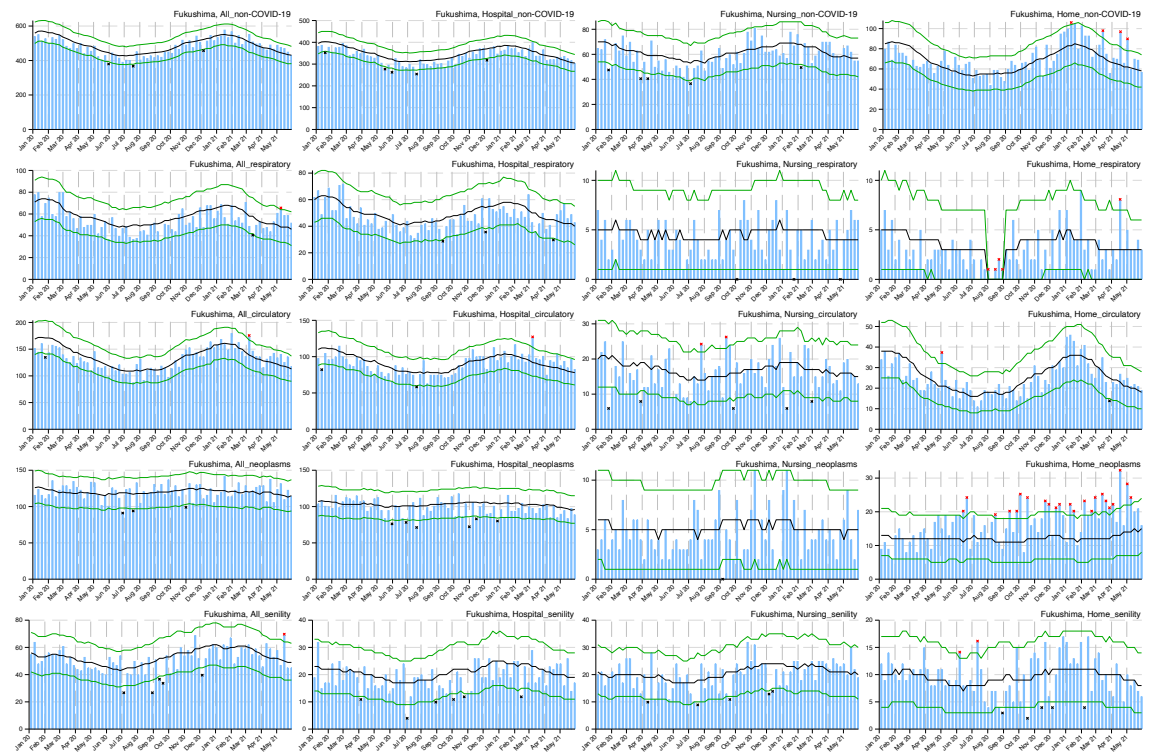

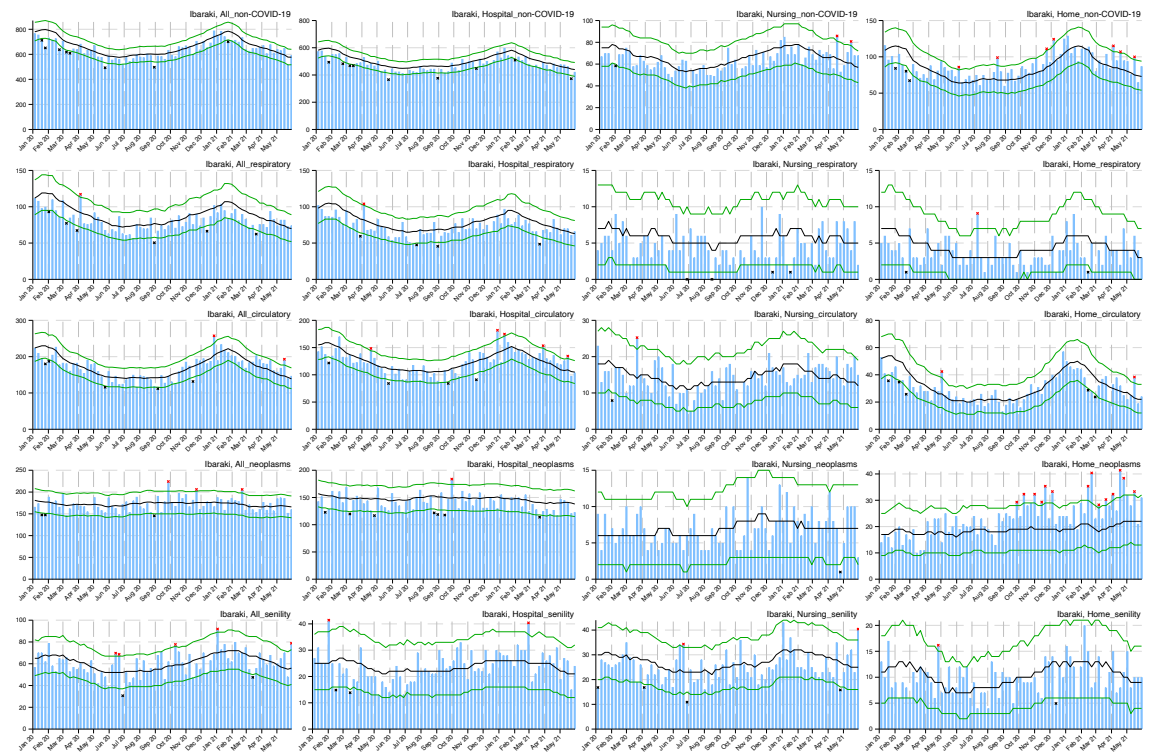

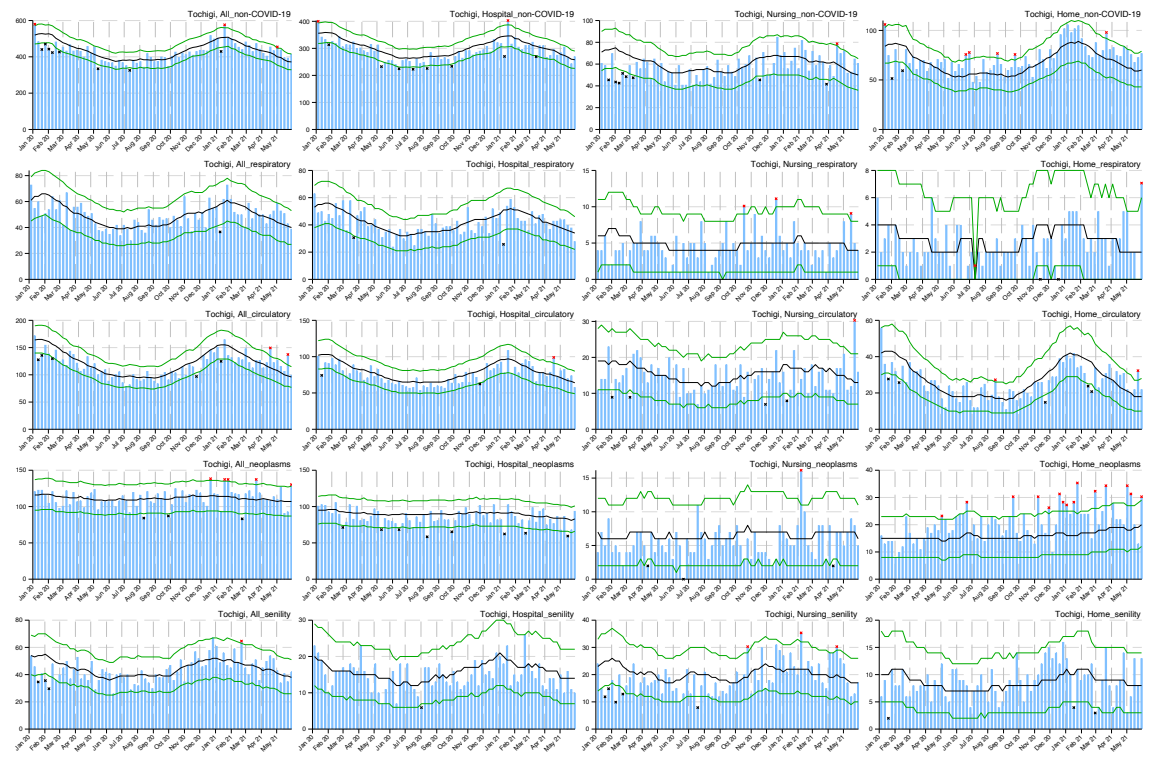

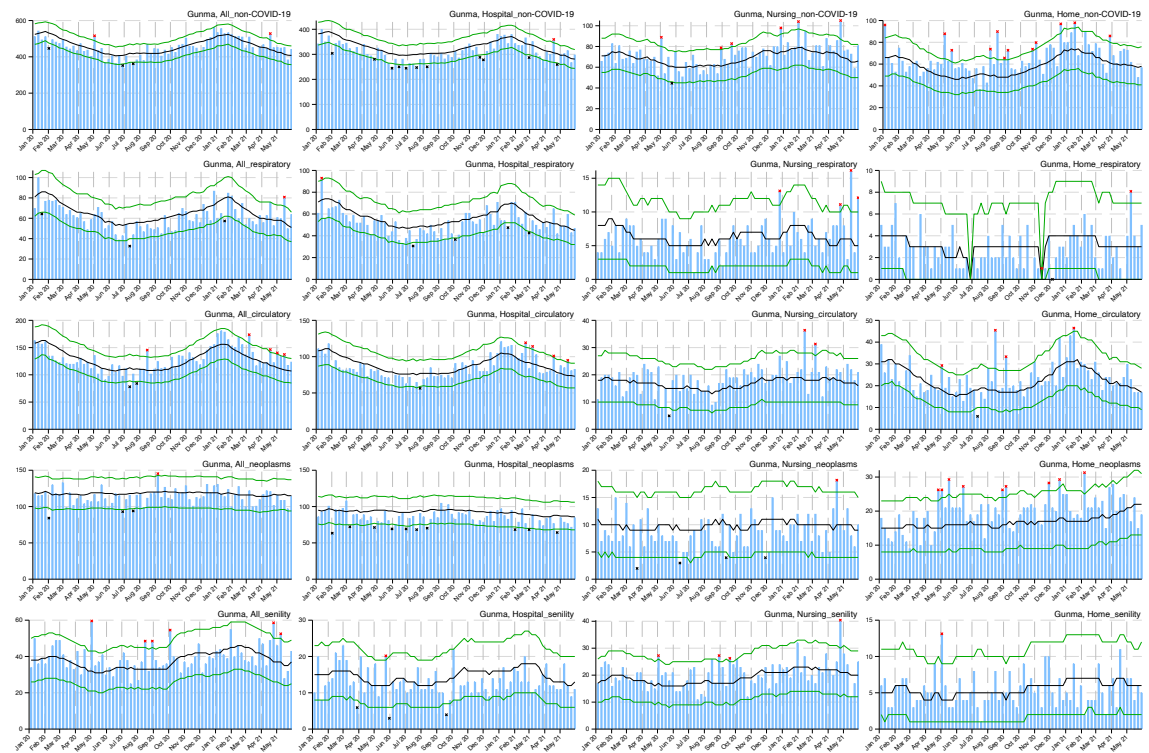

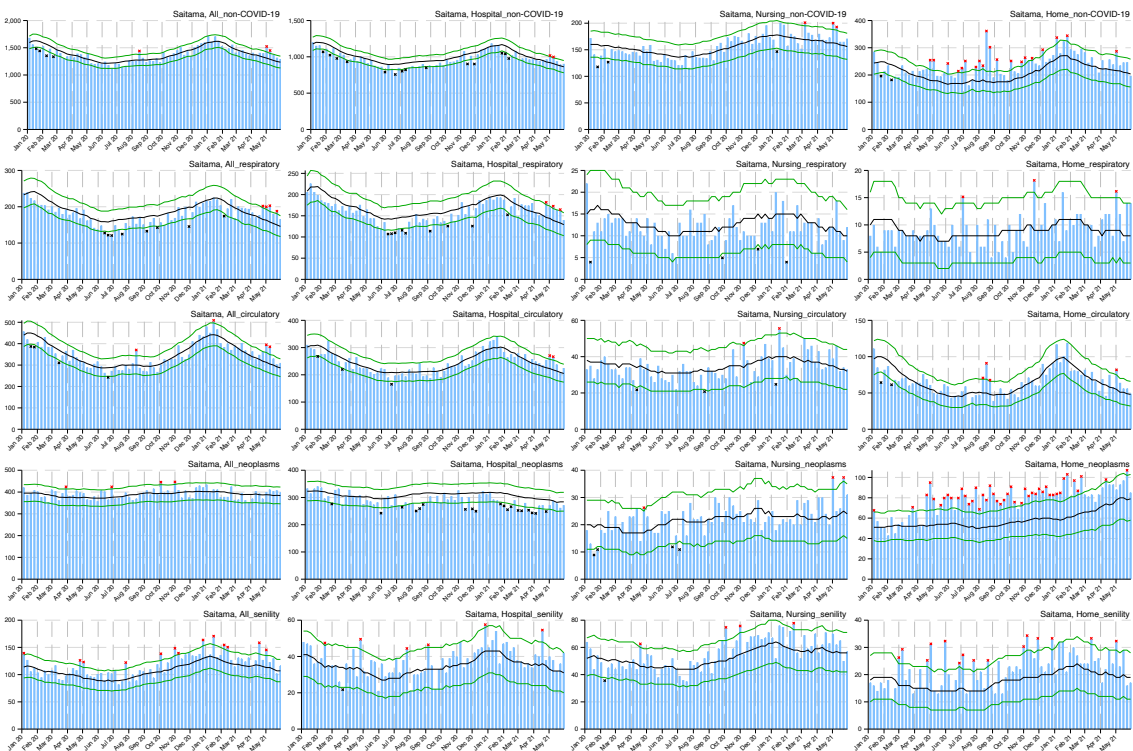



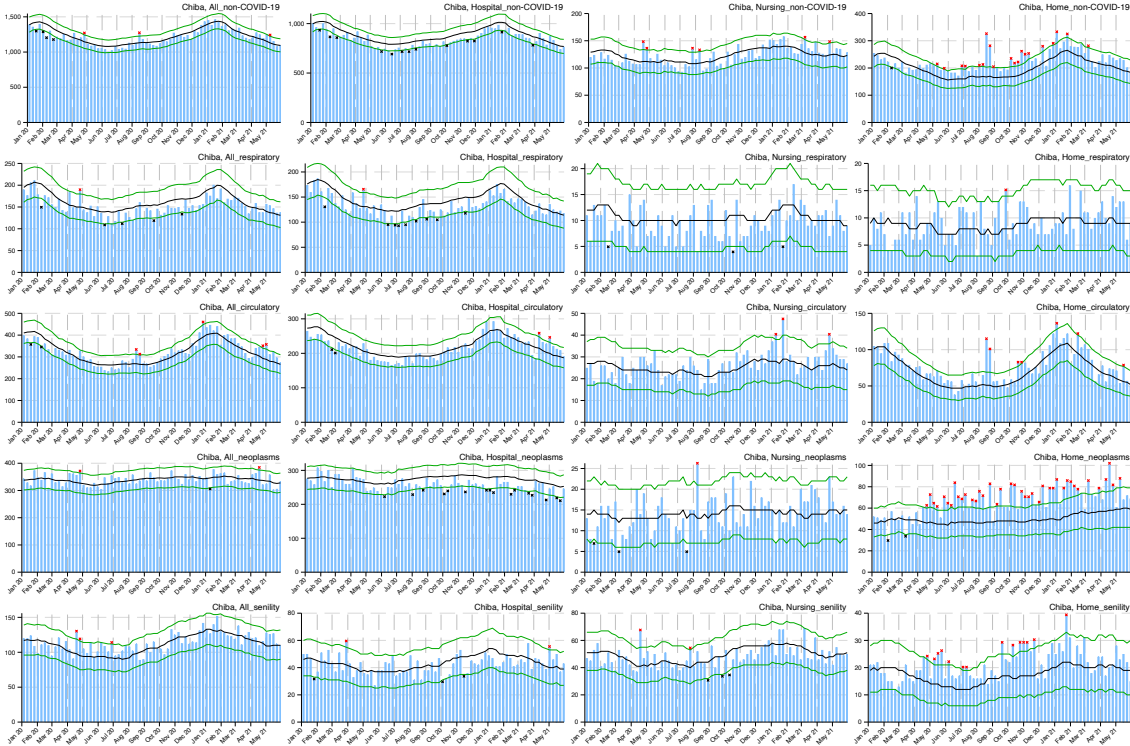

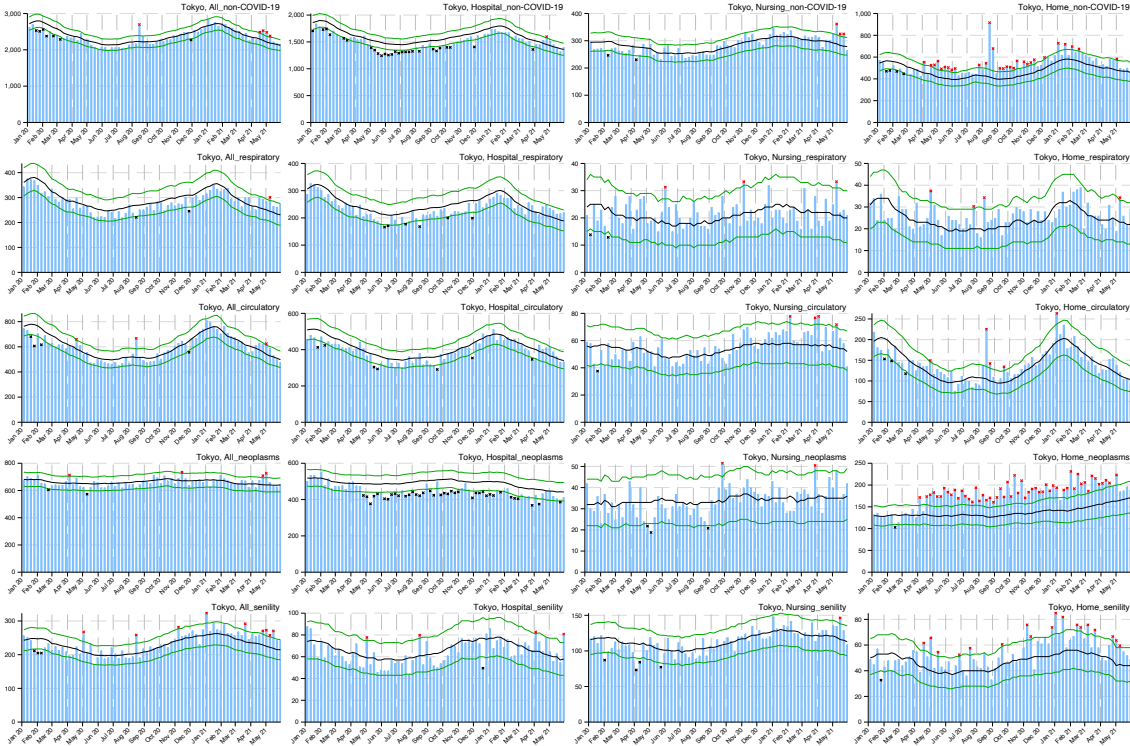

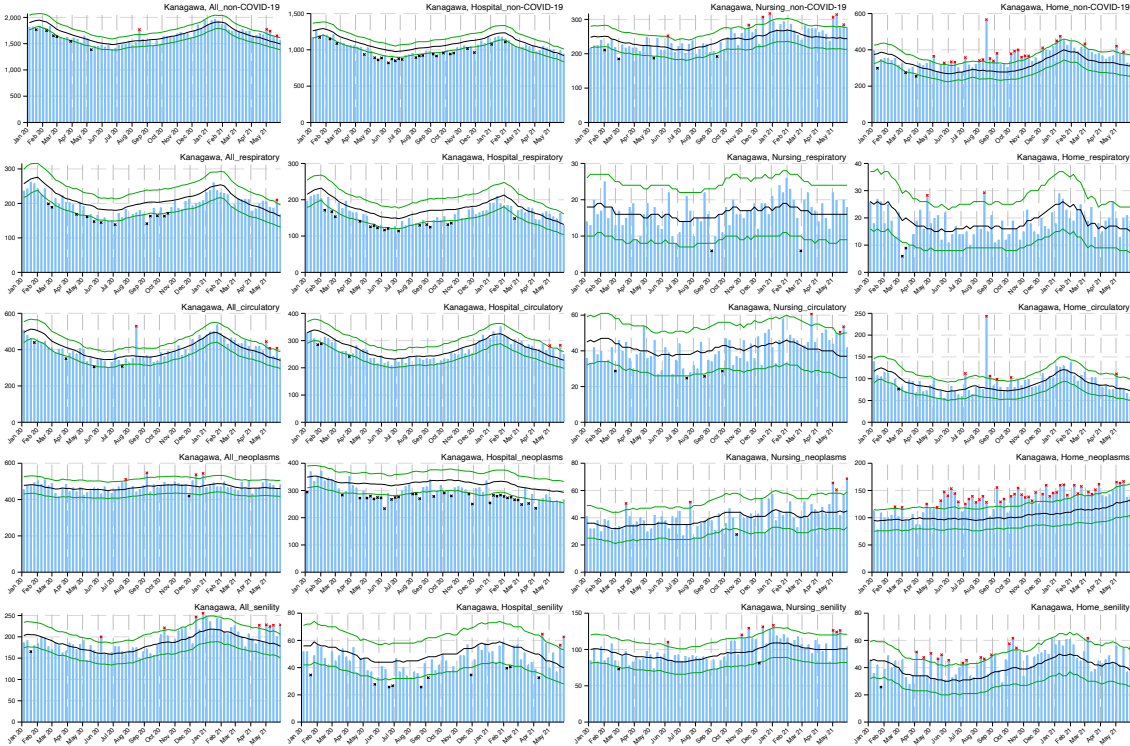

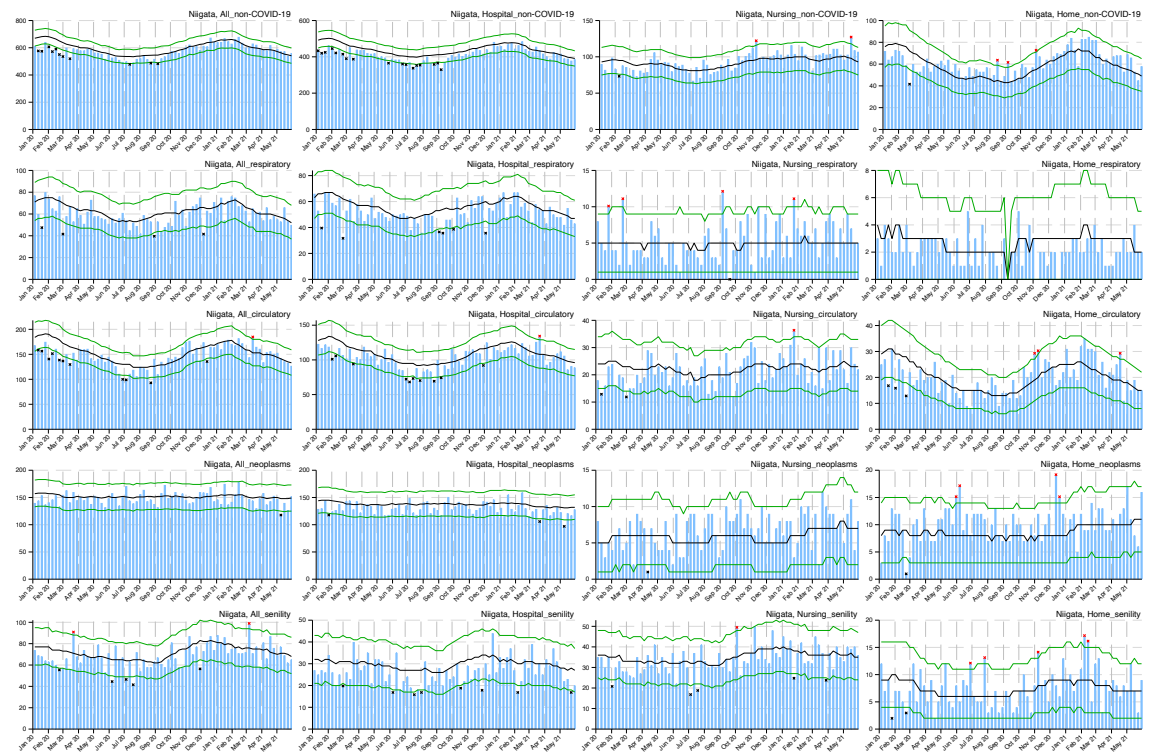

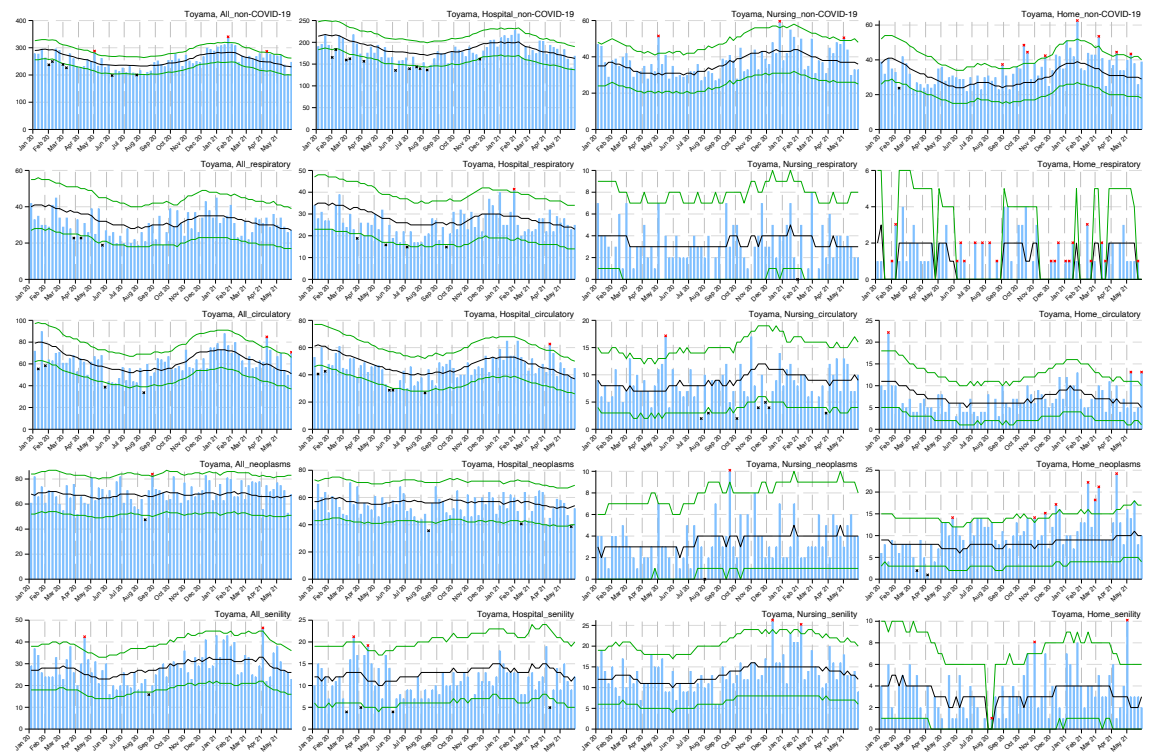

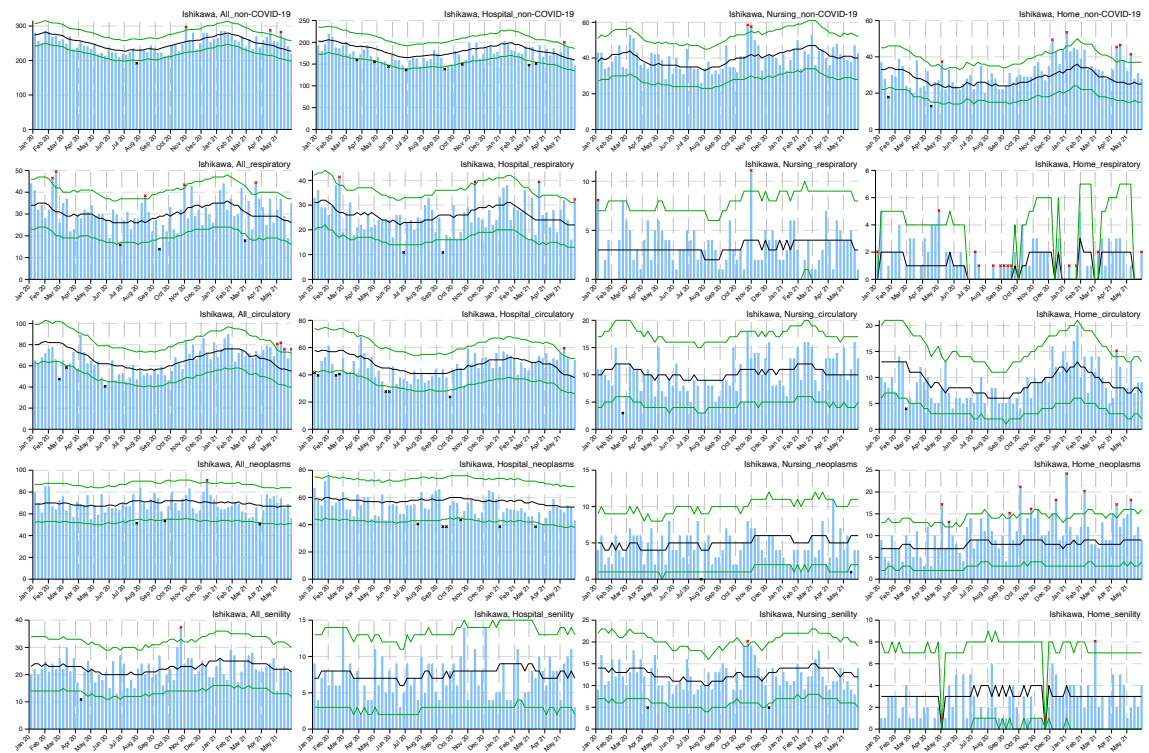

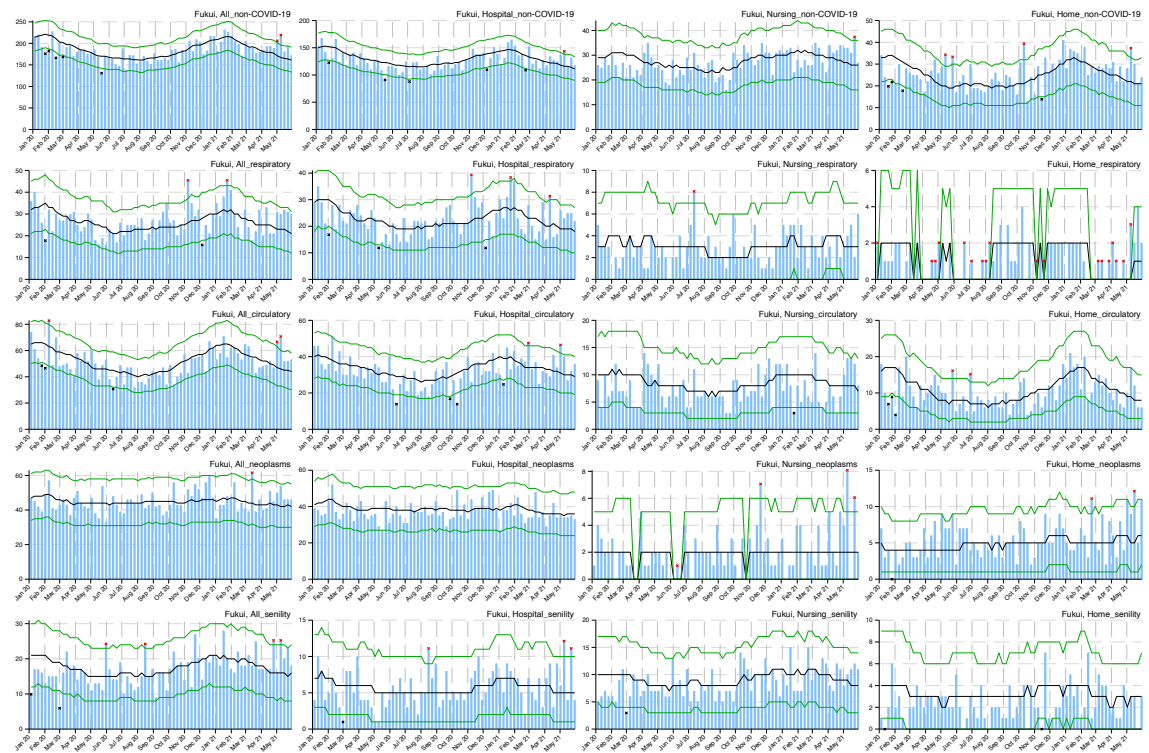

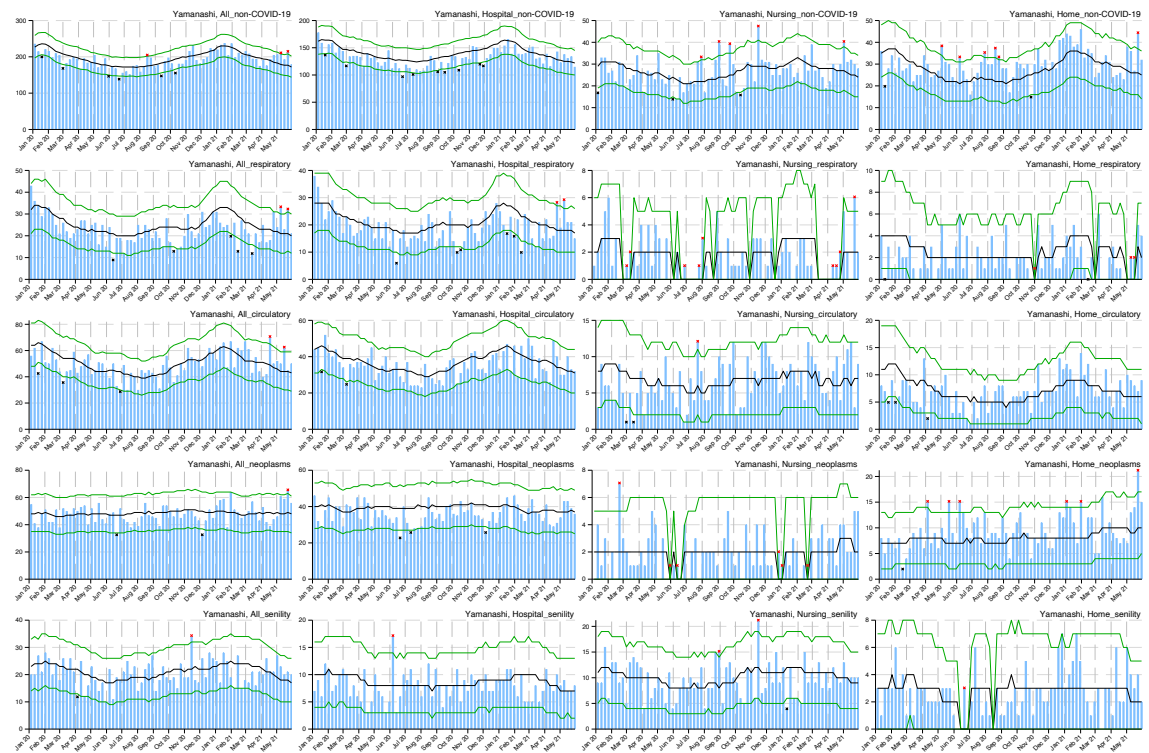



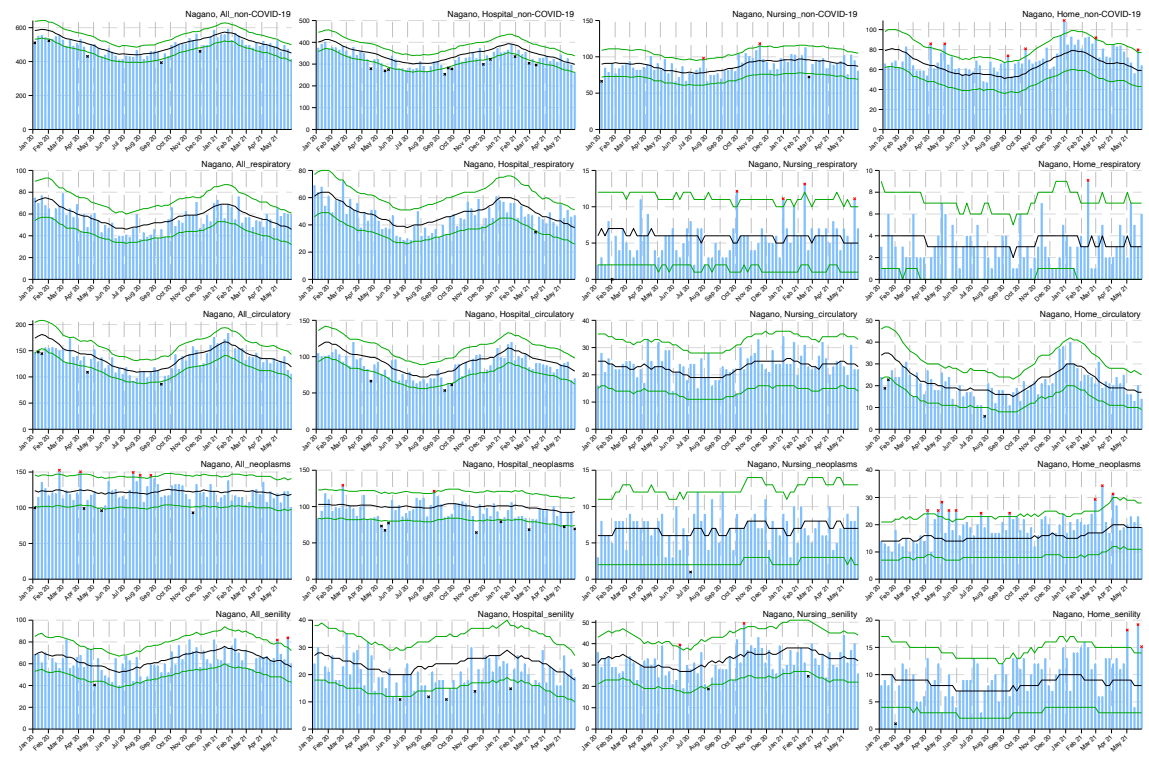

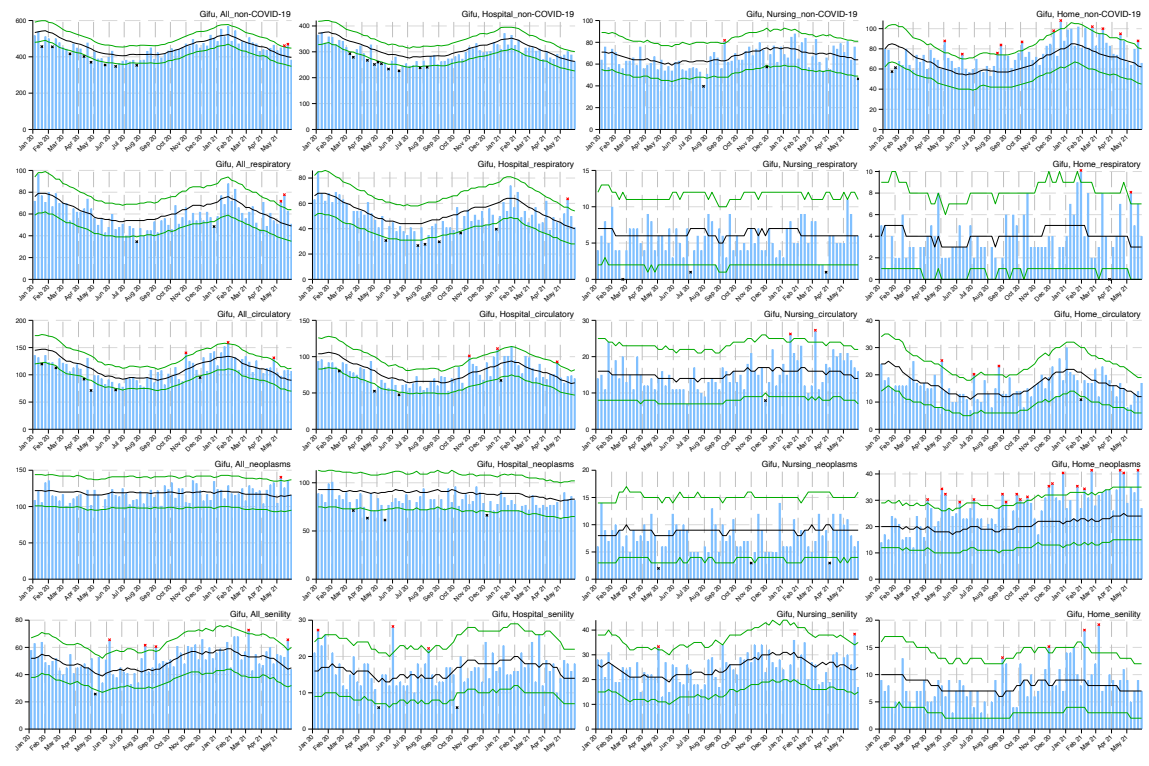

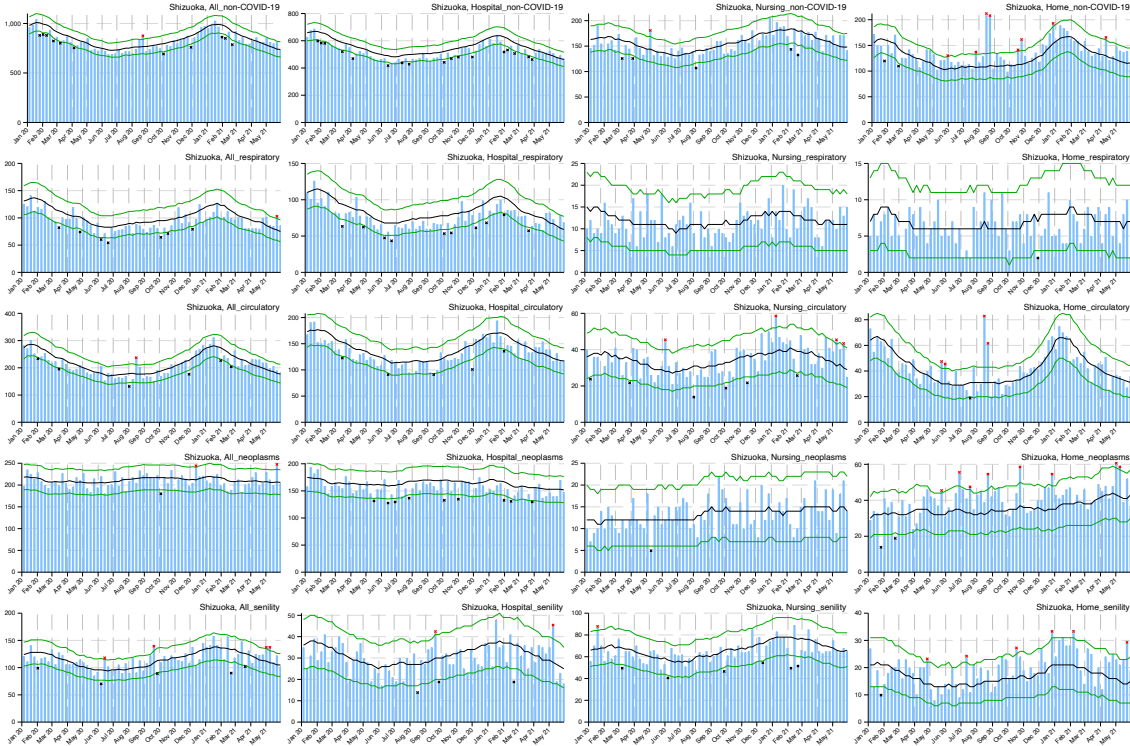

Aichi\_All\_non-COVID-19

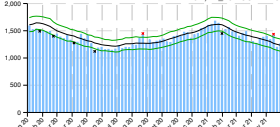

Aichi\_Hospital\_non-COVID-19

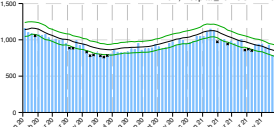

Aichi\_Nursing\_non-COVID-19

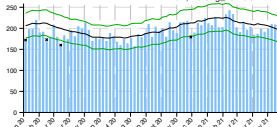

Aichi\_Home\_non-COVID-19

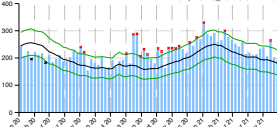

Aichi\_All\_respiratory

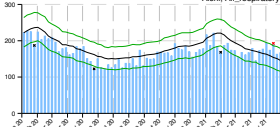

Aichi\_Hospital\_respiratory

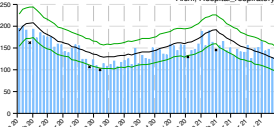

Aichi\_Nursing\_respiratory

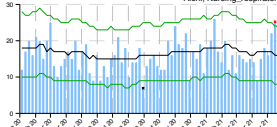

Aichi\_Home\_respiratory

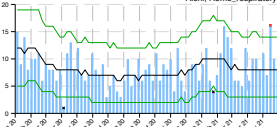

Aichi\_All\_circulatory

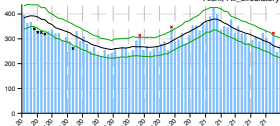

Aichi\_Hospital\_circulatory

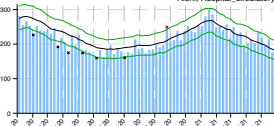

Aichi\_Nursing\_circulatory

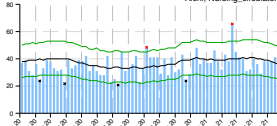

Aichi\_Home\_circulatory

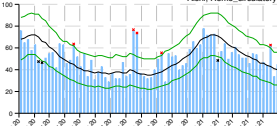

Aichi\_All\_neoplasms

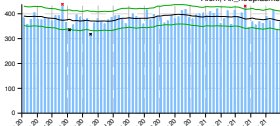

Aichi\_Hospital\_neoplasms

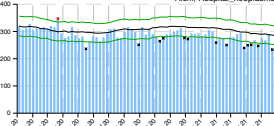

Aichi\_Nursing\_neoplasms

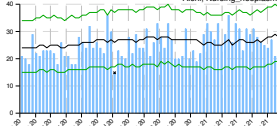

Aichi\_Home\_neoplasms

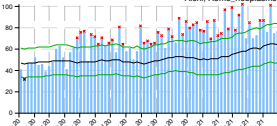

Aichi\_All\_senility

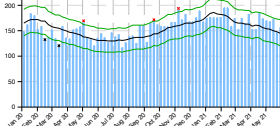

Aichi\_Hospital\_senility

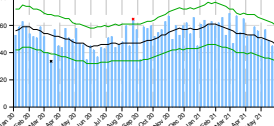

Aichi\_Nursing\_senility

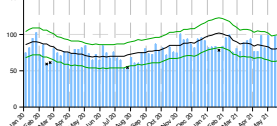

Aichi\_Home\_senility

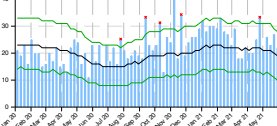

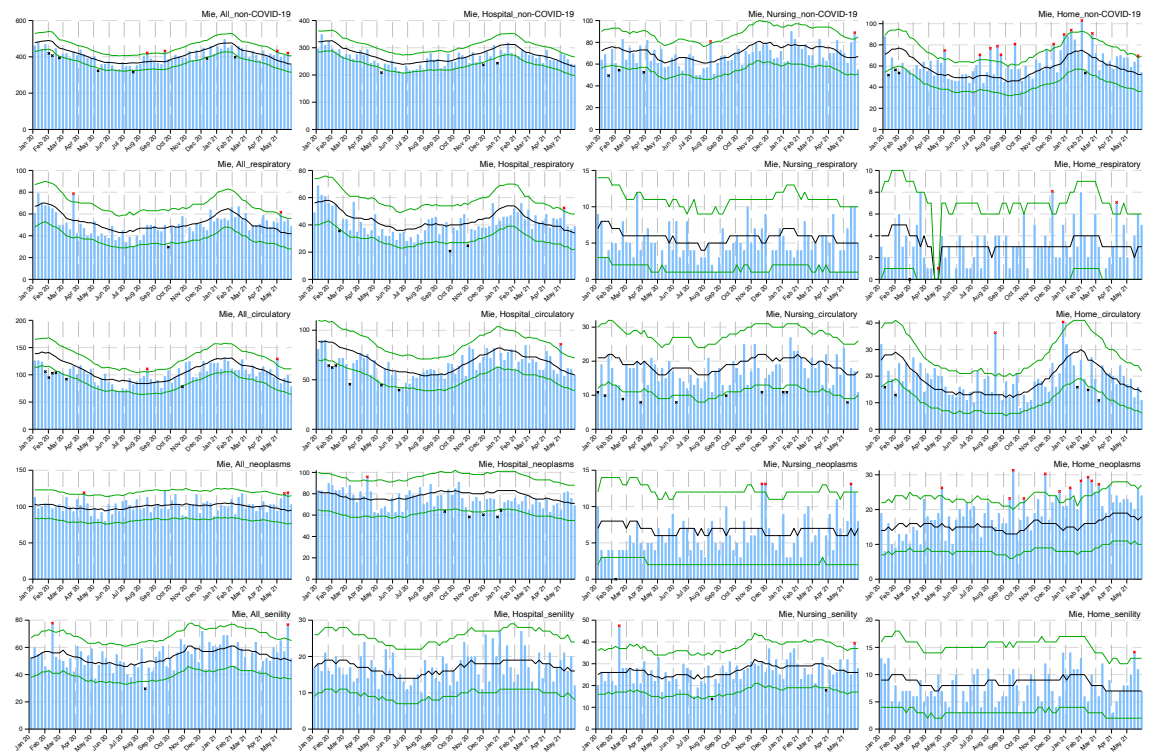

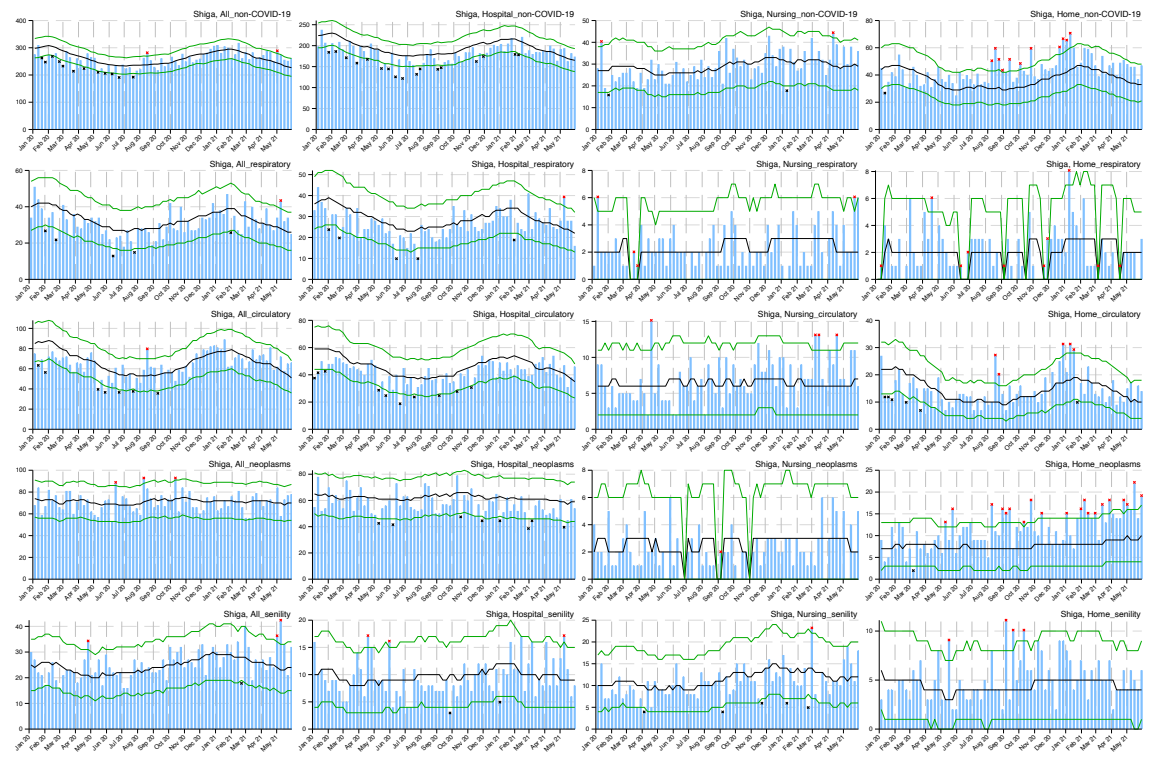

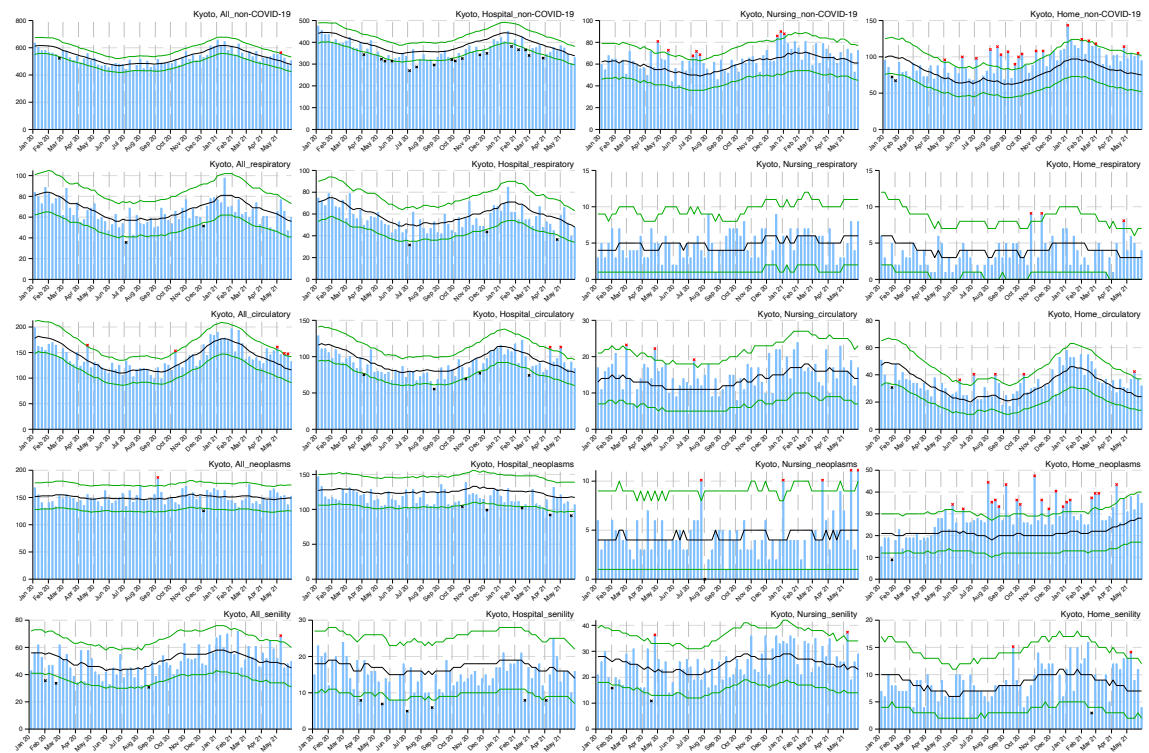

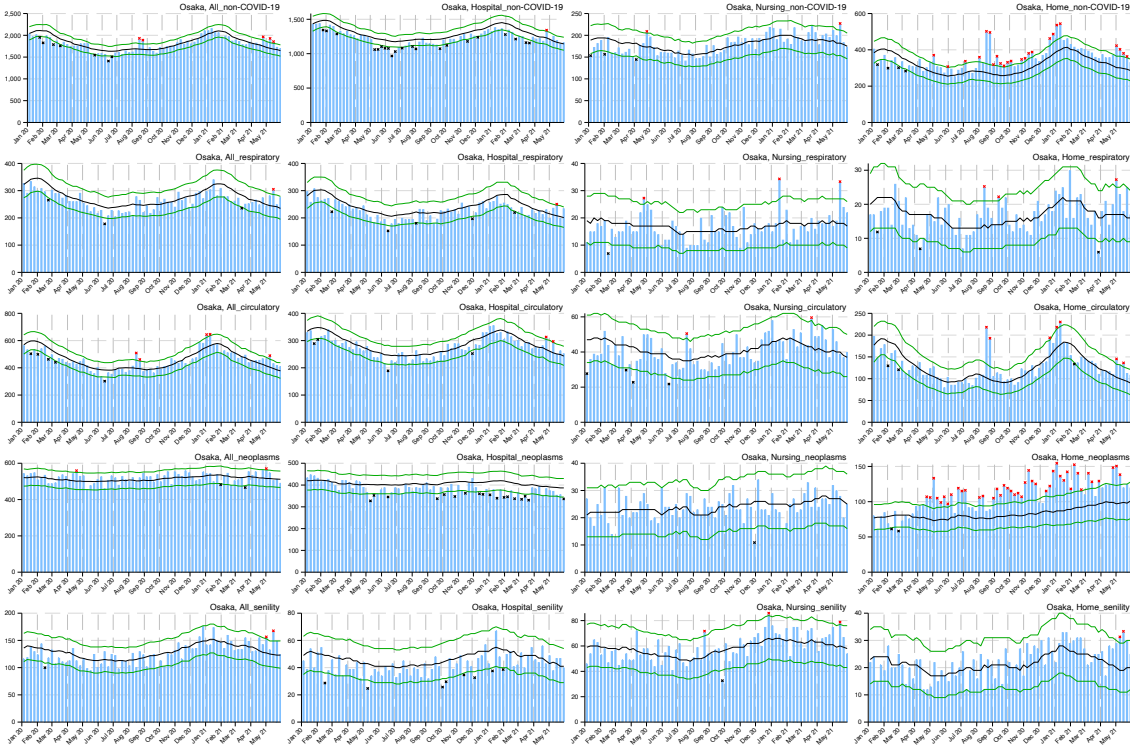



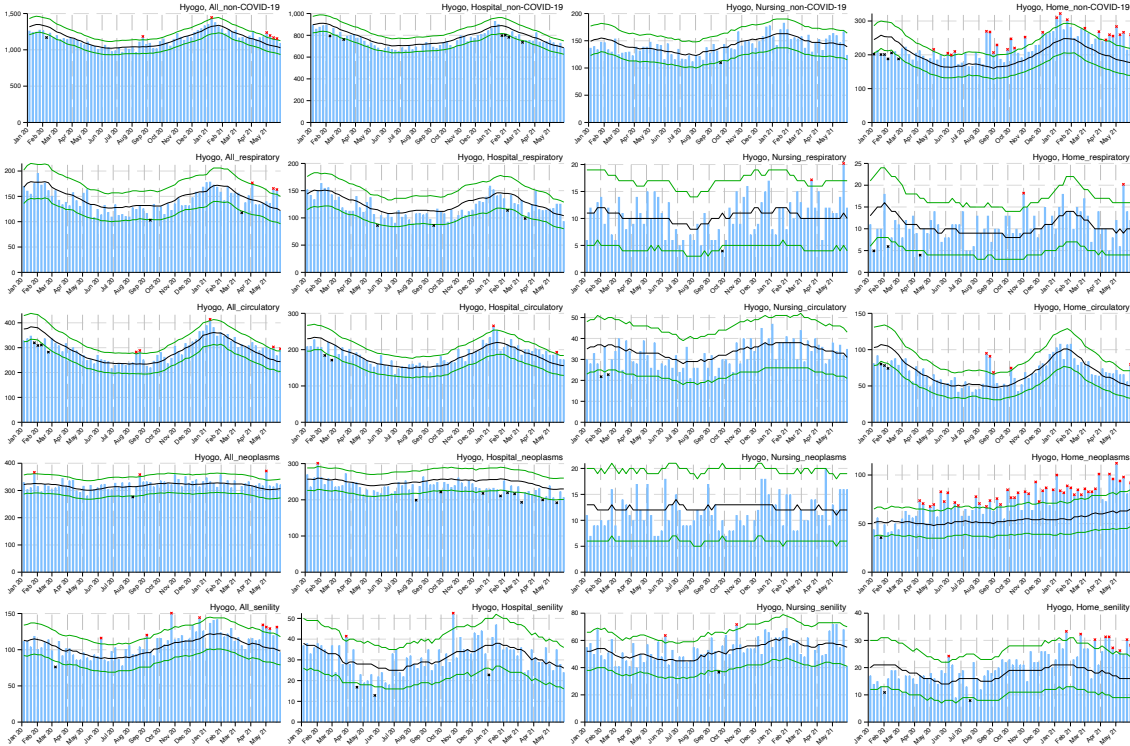

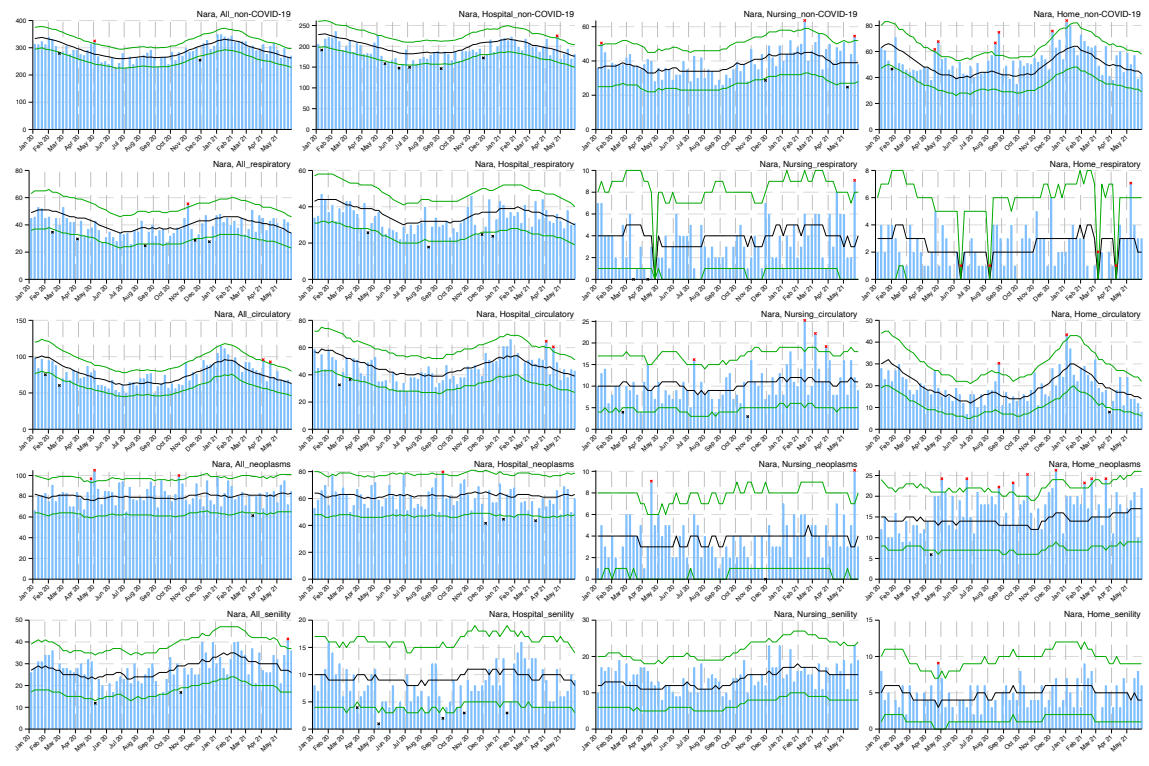

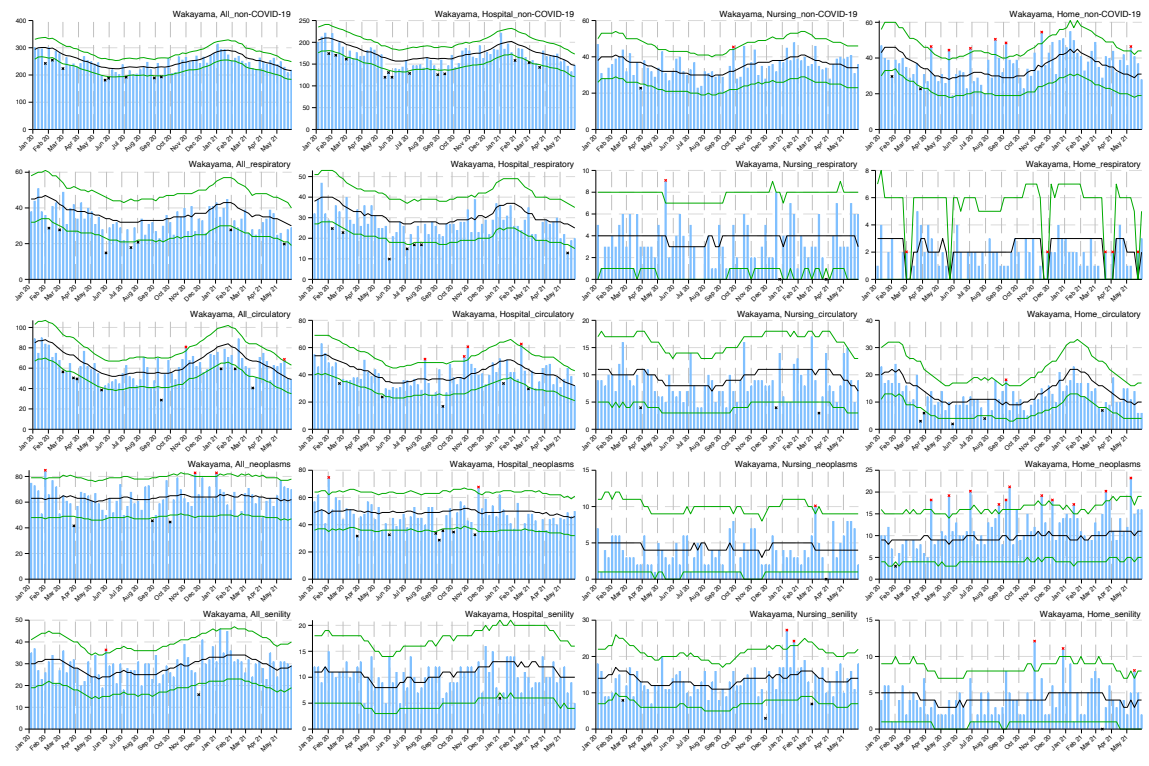

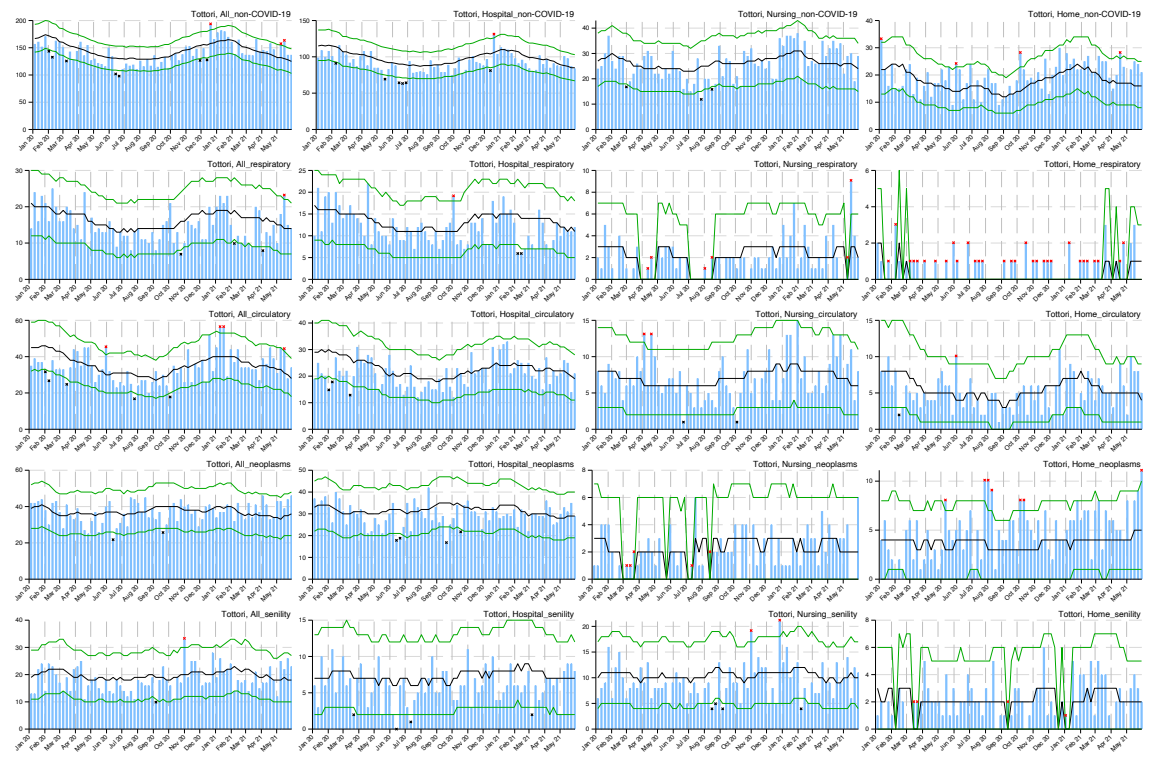

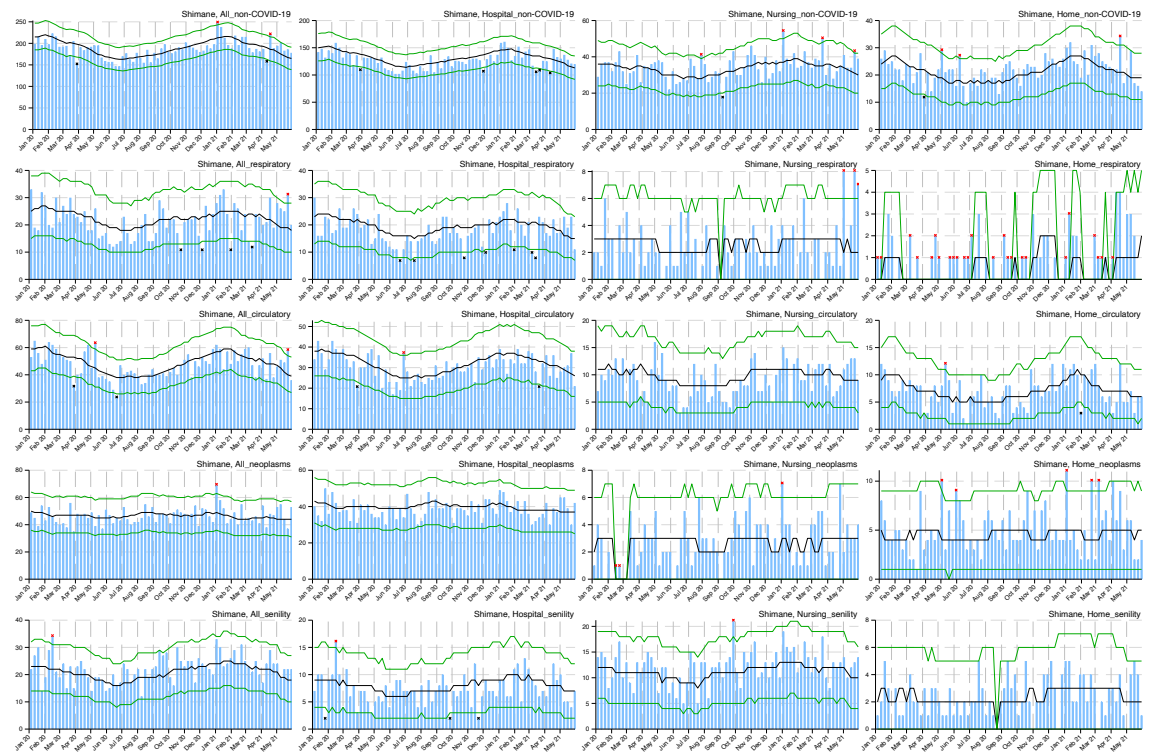

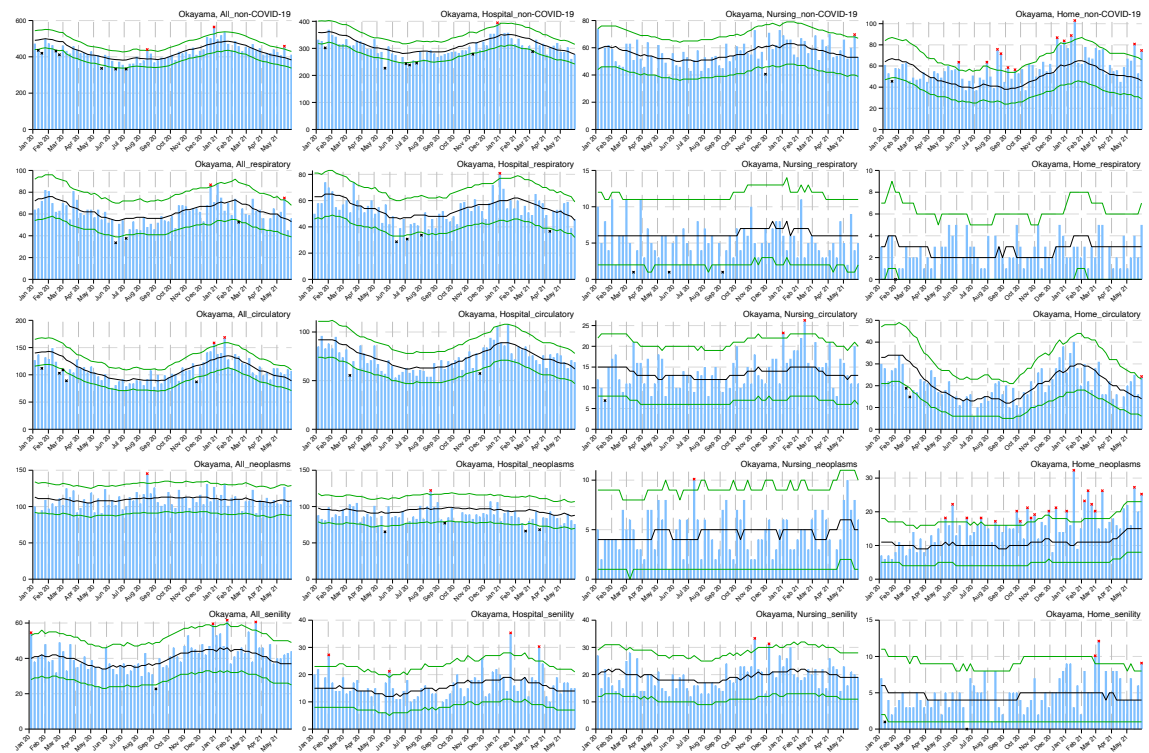

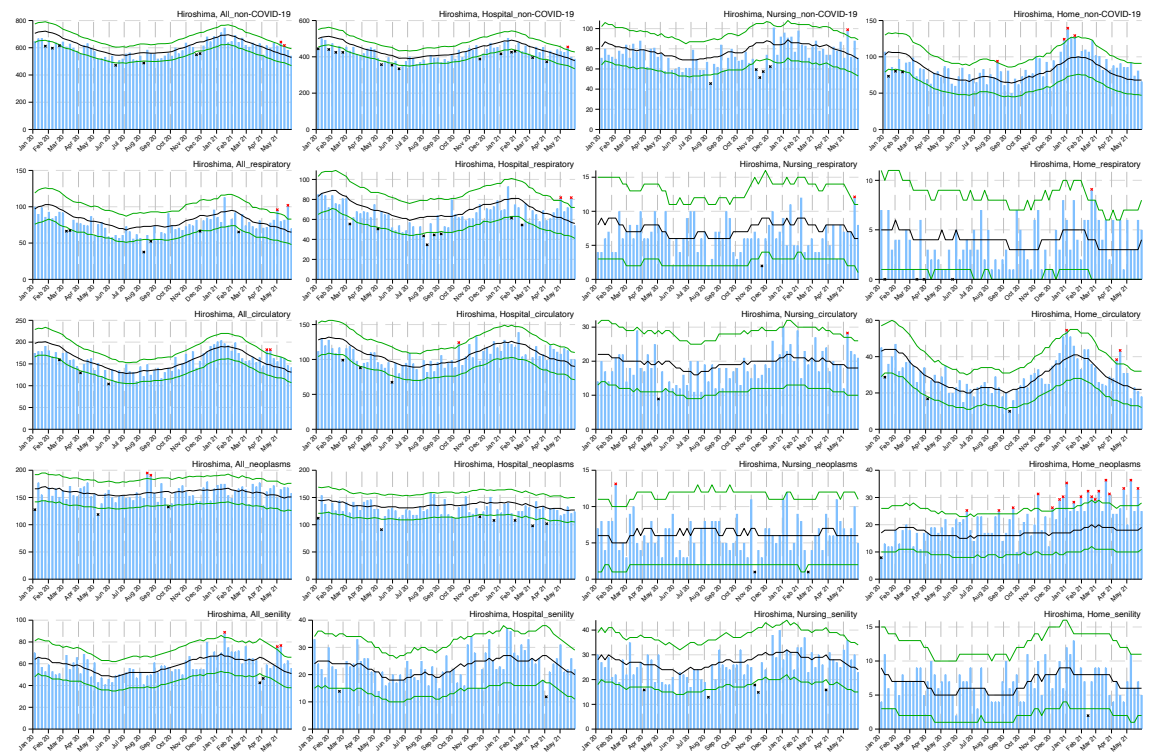

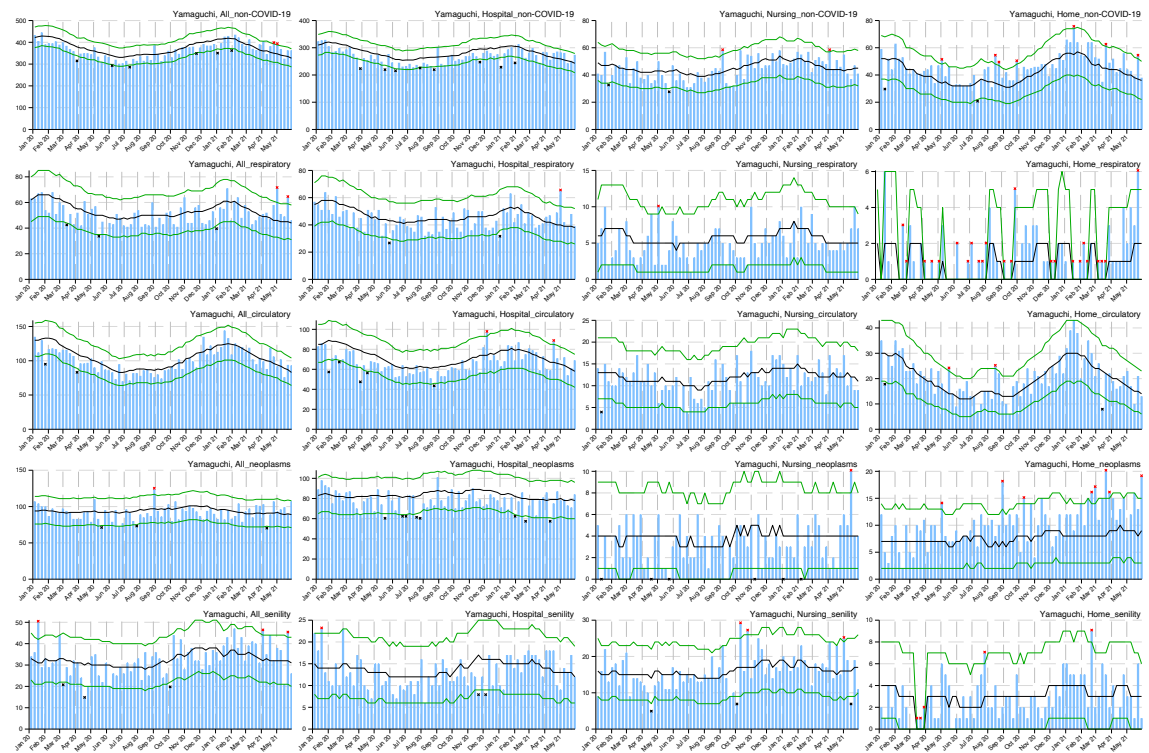



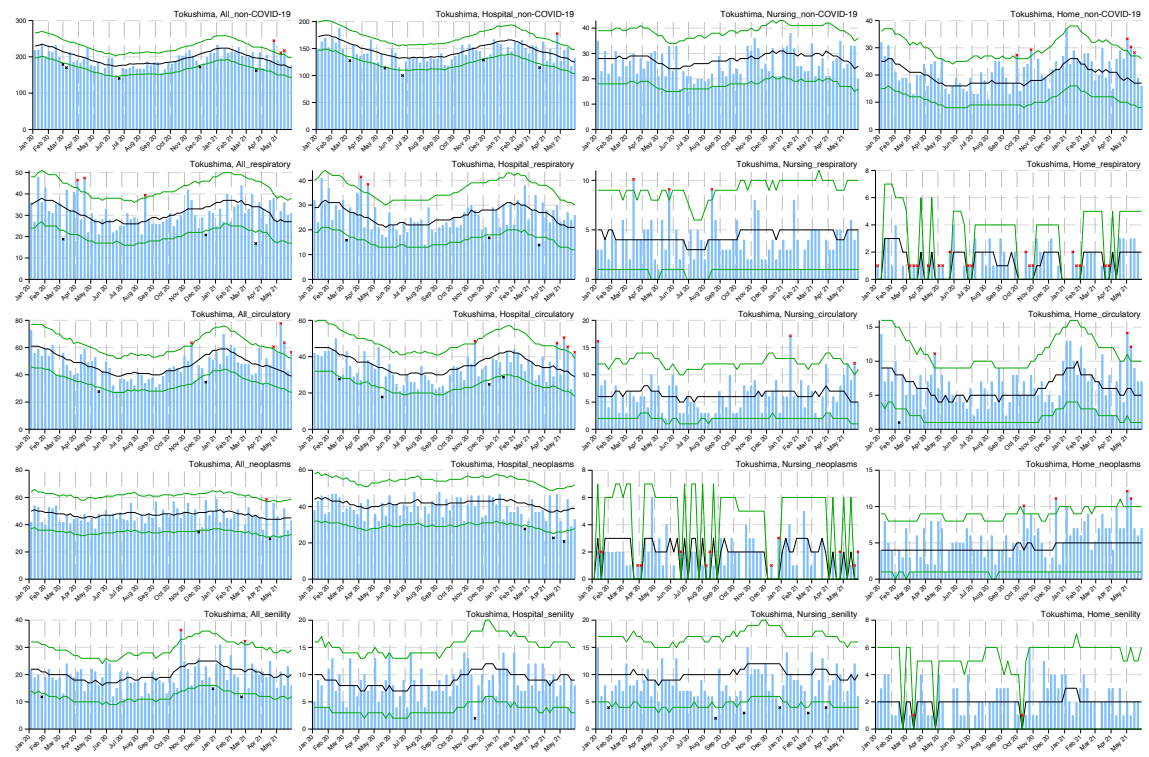

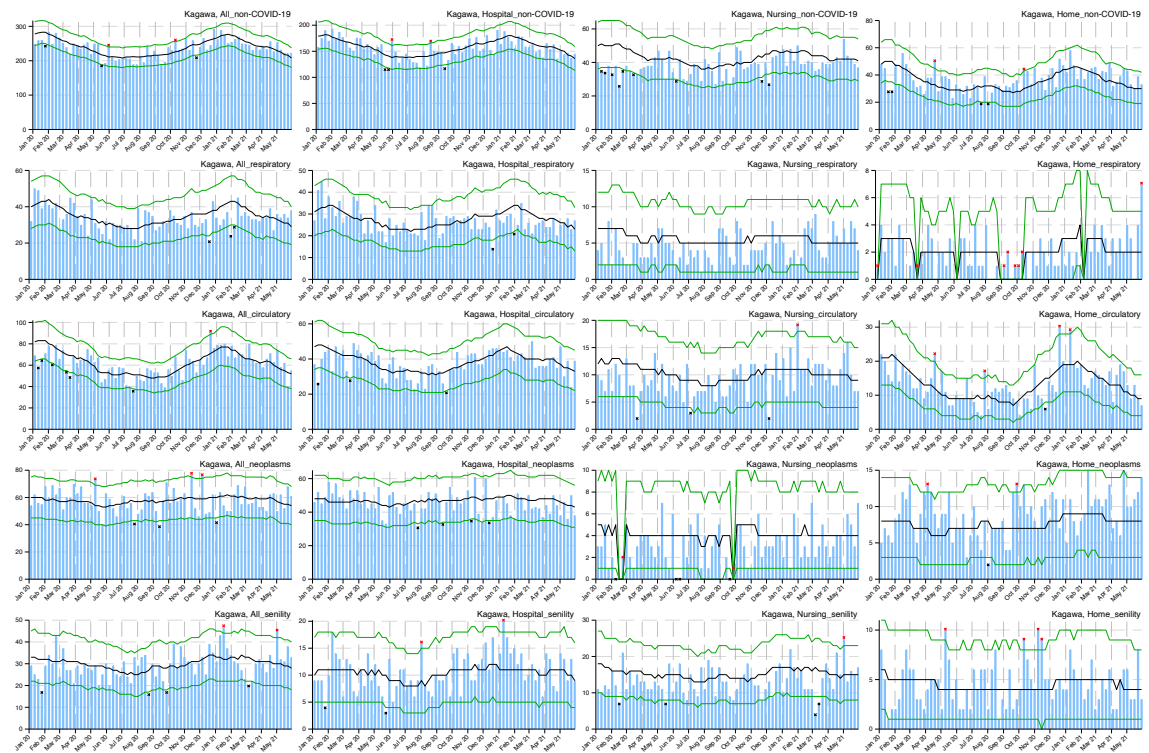

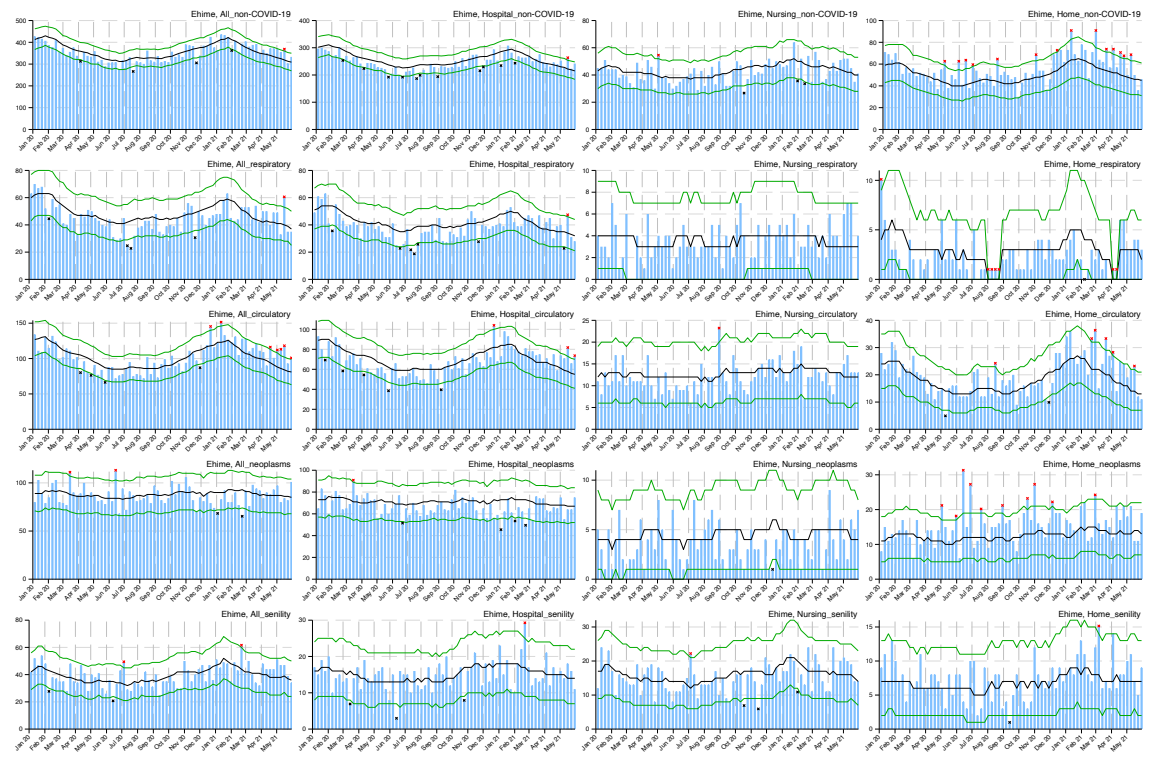

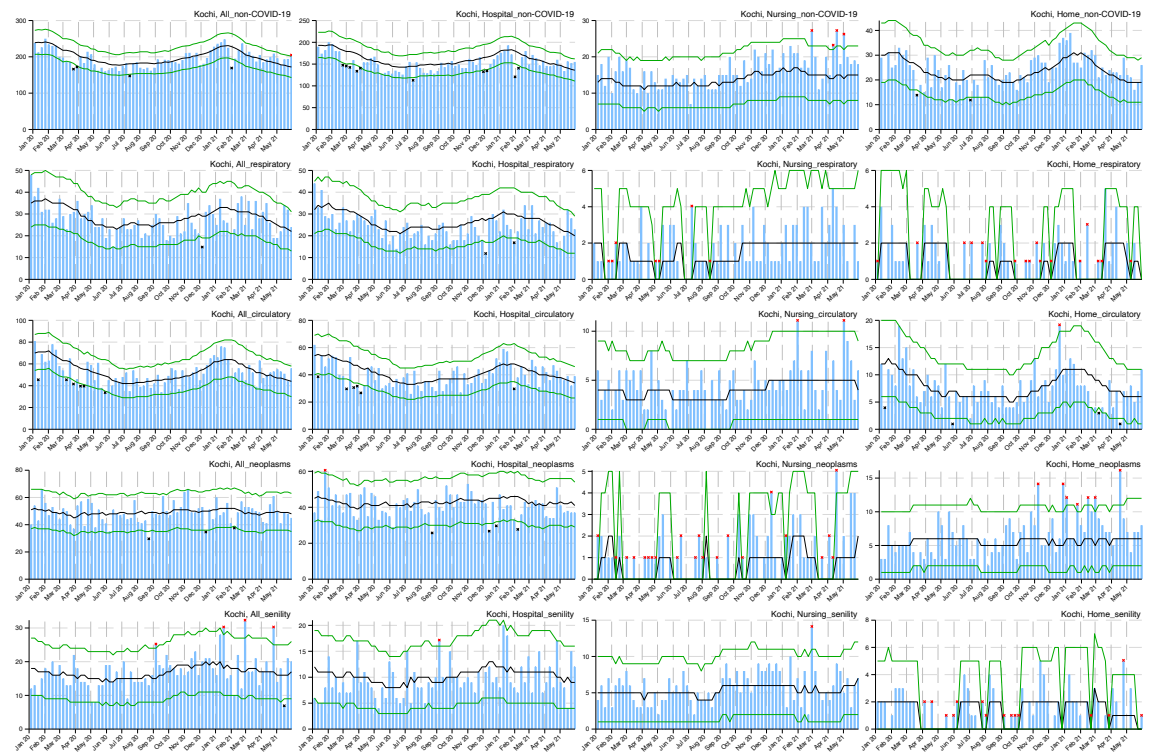

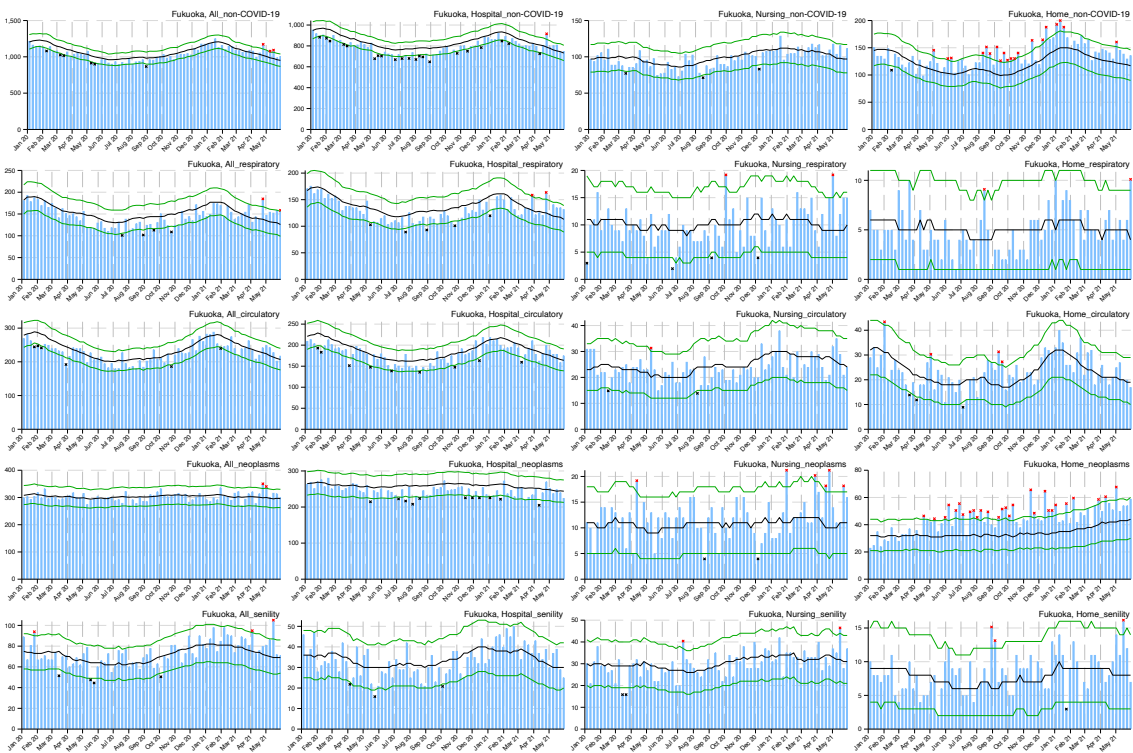

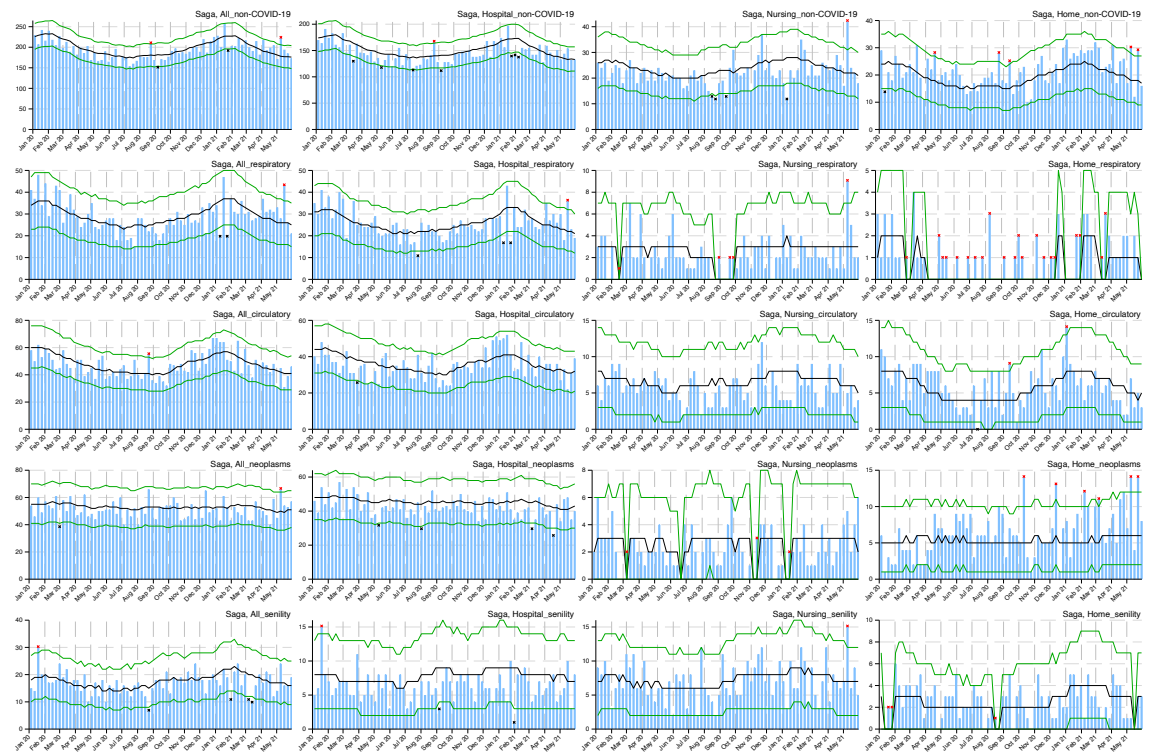

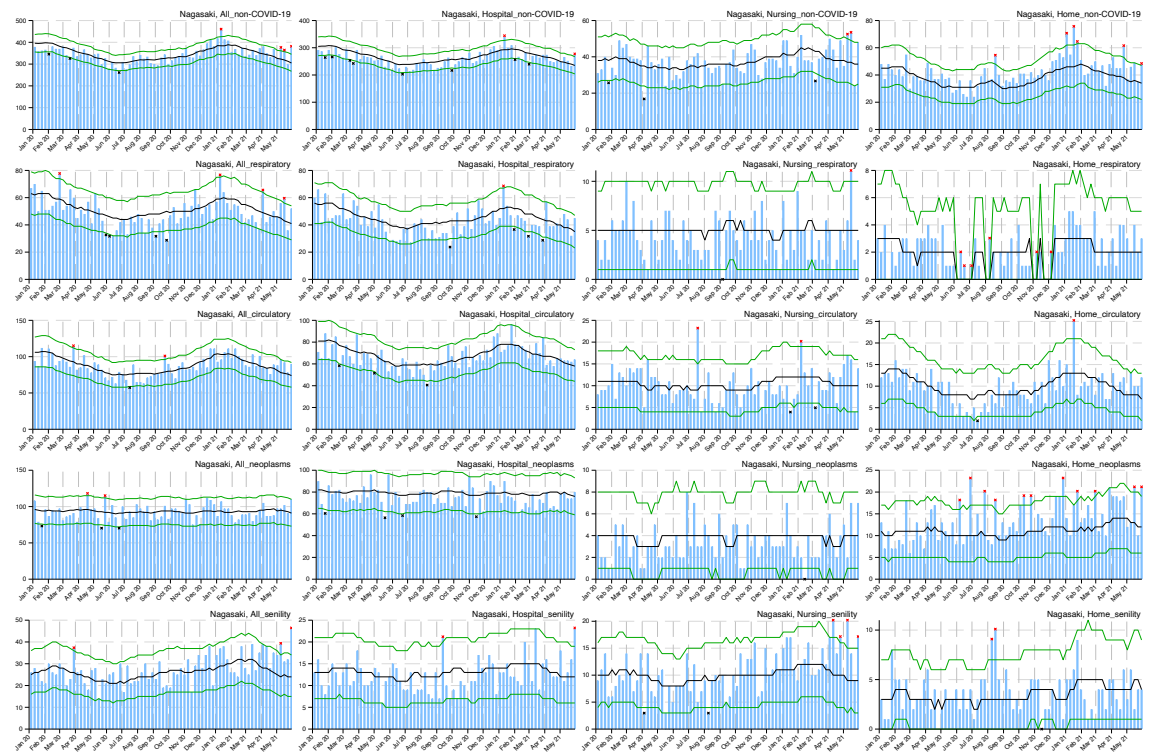

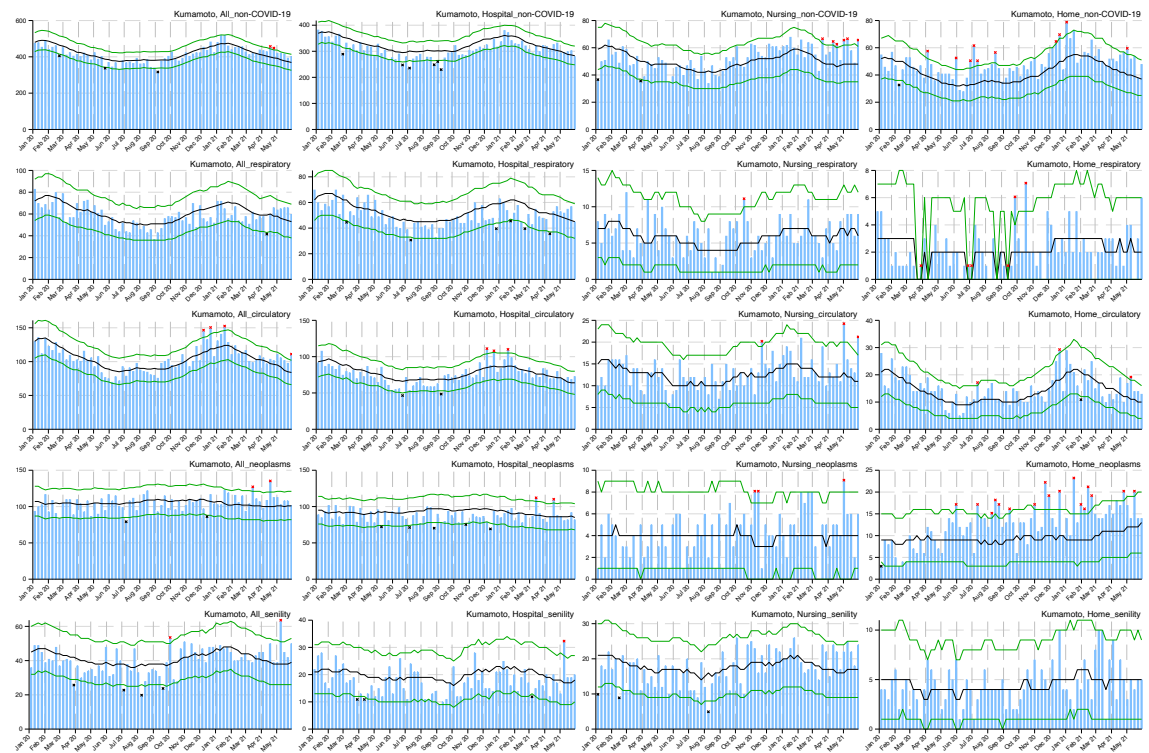



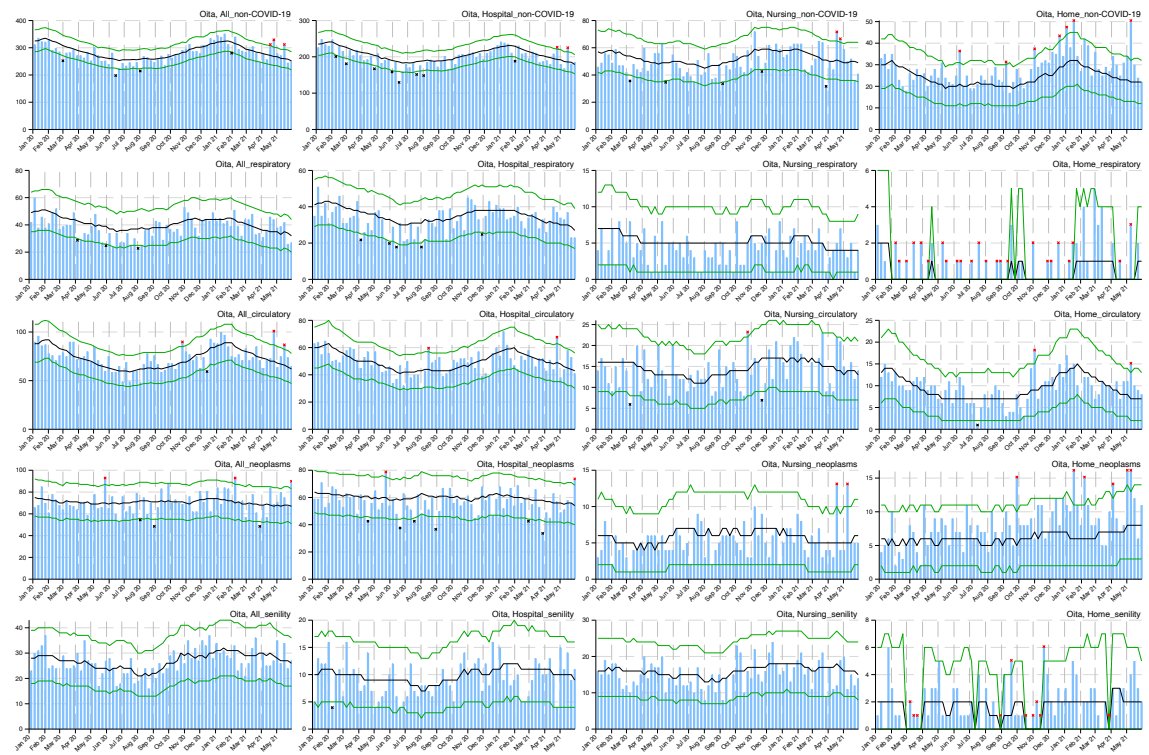

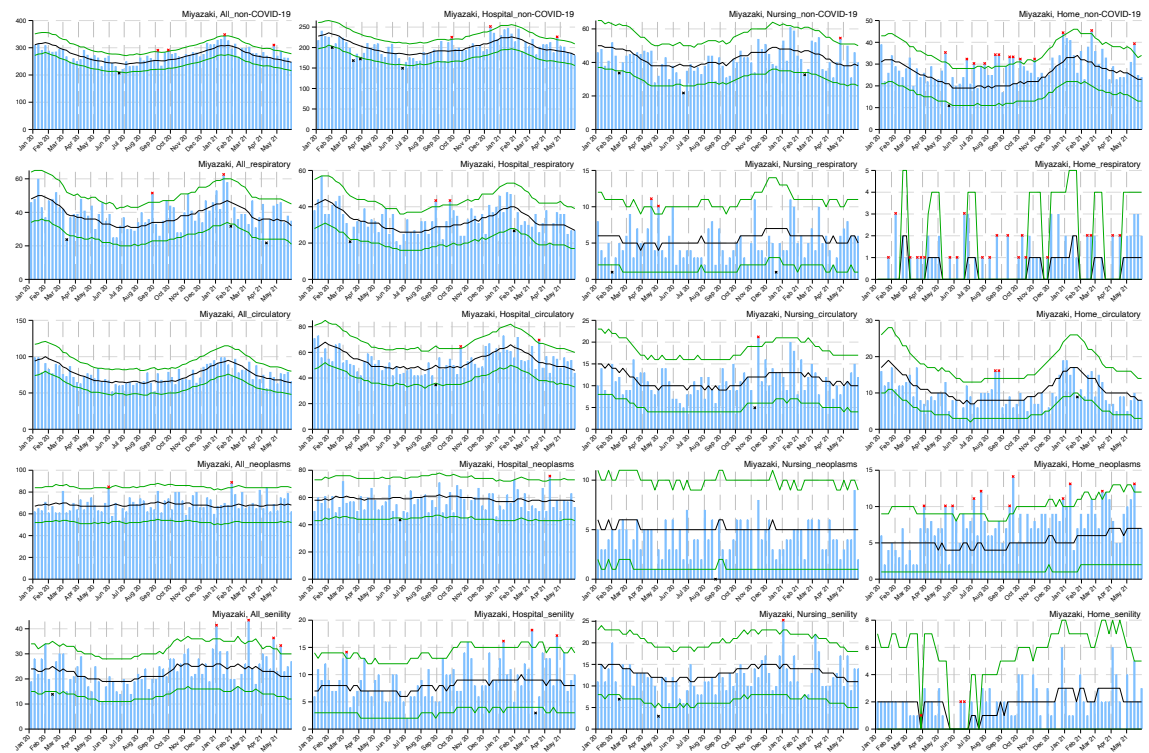

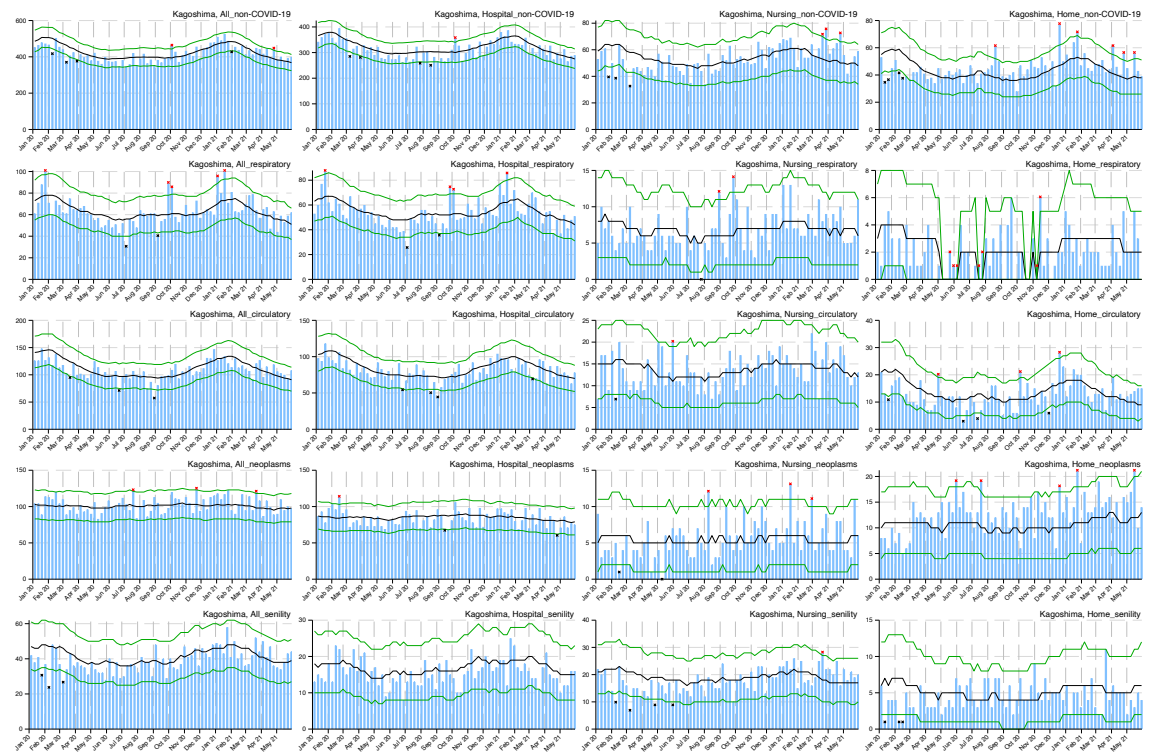

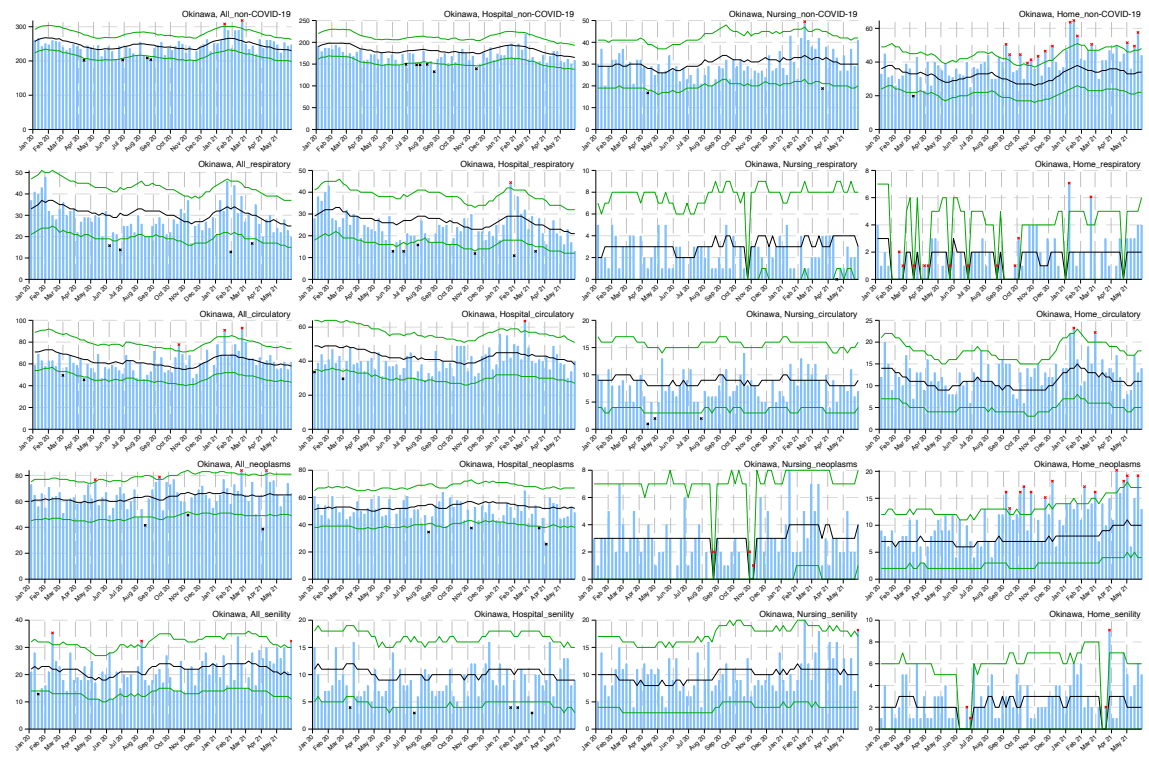

**Table A.1: Weekly number of observed and excess/exiguous deaths in Japan and 47 prefectures for non-COVID-19-related deaths in all places from January 2020 through May 2021.**

| Prefecture | Week                   | Observed | Excess deaths | Percent excess | Exiguous deaths | Percent exiguous |
|------------|------------------------|----------|---------------|----------------|-----------------|------------------|
| Japan      |                        |          |               |                |                 |                  |
|            | Apr 5 to Apr 11, 2021  | 26703    | 0–63          | 0.00–0.24      | 0–0             | 0.00–0.00        |
|            | Apr 12 to Apr 18, 2021 | 27626    | 0–1317        | 0.00–5.01      | 0–0             | 0.00–0.00        |
|            | Apr 19 to Apr 25, 2021 | 27710    | 155–1759      | 0.60–6.78      | 0–0             | 0.00–0.00        |
|            | Apr 26 to May 2, 2021  | 27710    | 690–2166      | 2.70–8.48      | 0–0             | 0.00–0.00        |
|            | May 3 to May 9, 2021   | 27353    | 689–2161      | 2.73–8.58      | 0–0             | 0.00–0.00        |
|            | May 10 to May 16, 2021 | 26698    | 461–1939      | 1.86–7.83      | 0–0             | 0.00–0.00        |
|            | May 17 to May 23, 2021 | 25443    | 0–997         | 0.00–4.08      | 0–0             | 0.00–0.00        |
|            | May 24 to May 30, 2021 | 25201    | 0–985         | 0.00–4.07      | 0–0             | 0.00–0.00        |
| Hokkaido   |                        |          |               |                |                 |                  |
|            | Apr 5 to Apr 11, 2021  | 1257     | 0–8           | 0.00–0.64      | 0–0             | 0.00–0.00        |
|            | Apr 12 to Apr 18, 2021 | 1256     | 0–24          | 0.00–1.95      | 0–0             | 0.00–0.00        |
|            | Apr 19 to Apr 25, 2021 | 1274     | 0–46          | 0.00–3.75      | 0–0             | 0.00–0.00        |
|            | Apr 26 to May 2, 2021  | 1310     | 5–98          | 0.41–8.09      | 0–0             | 0.00–0.00        |
|            | May 3 to May 9, 2021   | 1300     | 3–95          | 0.25–7.88      | 0–0             | 0.00–0.00        |
|            | May 10 to May 16, 2021 | 1279     | 0–81          | 0.00–6.76      | 0–0             | 0.00–0.00        |
|            | May 17 to May 23, 2021 | 1322     | 32–126        | 2.68–10.54     | 0–0             | 0.00–0.00        |
|            | May 24 to May 30, 2021 | 1268     | 0–82          | 0.00–6.91      | 0–0             | 0.00–0.00        |
| Aomori     |                        |          |               |                |                 |                  |
|            | Apr 5 to Apr 11, 2021  | 369      | 0–14          | 0.00–3.94      | 0–0             | 0.00–0.00        |
|            | Apr 12 to Apr 18, 2021 | 360      | 0–6           | 0.00–1.69      | 0–0             | 0.00–0.00        |
|            | Apr 19 to Apr 25, 2021 | 352      | 0–2           | 0.00–0.57      | 0–0             | 0.00–0.00        |
|            | Apr 26 to May 2, 2021  | 368      | 0–22          | 0.00–6.36      | 0–0             | 0.00–0.00        |
|            | May 3 to May 9, 2021   | 354      | 0–12          | 0.00–3.51      | 0–0             | 0.00–0.00        |
|            | May 10 to May 16, 2021 | 371      | 0–37          | 0.00–11.08     | 0–0             | 0.00–0.00        |
|            | May 17 to May 23, 2021 | 362      | 0–29          | 0.00–8.71      | 0–0             | 0.00–0.00        |
|            | May 24 to May 30, 2021 | 325      | 0–0           | 0.00–0.00      | 0–5             | 0.00–1.52        |
| Iwate      |                        |          |               |                |                 |                  |
|            | Apr 5 to Apr 11, 2021  | 336      | 0–0           | 0.00–0.00      | 0–4             | 0.00–1.18        |
|            | Apr 12 to Apr 18, 2021 | 324      | 0–0           | 0.00–0.00      | 0–12            | 0.00–3.57        |
|            | Apr 19 to Apr 25, 2021 | 309      | 0–0           | 0.00–0.00      | 0–26            | 0.00–7.76        |
|            | Apr 26 to May 2, 2021  | 344      | 0–16          | 0.00–4.88      | 0–0             | 0.00–0.00        |
|            | May 3 to May 9, 2021   | 344      | 0–22          | 0.00–6.83      | 0–0             | 0.00–0.00        |
|            | May 10 to May 16, 2021 | 305      | 0–0           | 0.00–0.00      | 0–10            | 0.00–3.17        |
|            | May 17 to May 23, 2021 | 317      | 0–4           | 0.00–1.28      | 0–0             | 0.00–0.00        |
|            | May 24 to May 30, 2021 | 291      | 0–0           | 0.00–0.00      | 0–15            | 0.00–4.90        |
| Miyagi     |                        |          |               |                |                 |                  |
|            | Apr 5 to Apr 11, 2021  | 499      | 0–17          | 0.00–3.53      | 0–0             | 0.00–0.00        |
|            | Apr 12 to Apr 18, 2021 | 551      | 22–72         | 4.59–15.03     | 0–0             | 0.00–0.00        |
|            | Apr 19 to Apr 25, 2021 | 469      | 0–0           | 0.00–0.00      | 0–3             | 0.00–0.64        |
|            | Apr 26 to May 2, 2021  | 492      | 0–21          | 0.00–4.46      | 0–0             | 0.00–0.00        |
|            | May 3 to May 9, 2021   | 489      | 0–25          | 0.00–5.39      | 0–0             | 0.00–0.00        |

|           |                        |     |       |            |      |            |
|-----------|------------------------|-----|-------|------------|------|------------|
|           | May 10 to May 16, 2021 | 436 | 0-0   | 0.00-0.00  | 0-21 | 0.00-4.60  |
|           | May 17 to May 23, 2021 | 434 | 0-0   | 0.00-0.00  | 0-15 | 0.00-3.34  |
|           | May 24 to May 30, 2021 | 457 | 0-17  | 0.00-3.86  | 0-0  | 0.00-0.00  |
| Akita     |                        |     |       |            |      |            |
|           | Apr 5 to Apr 11, 2021  | 309 | 0-6   | 0.00-1.98  | 0-0  | 0.00-0.00  |
|           | Apr 12 to Apr 18, 2021 | 325 | 0-21  | 0.00-6.91  | 0-0  | 0.00-0.00  |
|           | Apr 19 to Apr 25, 2021 | 288 | 0-0   | 0.00-0.00  | 0-14 | 0.00-4.64  |
|           | Apr 26 to May 2, 2021  | 335 | 5-41  | 1.70-13.95 | 0-0  | 0.00-0.00  |
|           | May 3 to May 9, 2021   | 338 | 14-49 | 4.84-16.96 | 0-0  | 0.00-0.00  |
|           | May 10 to May 16, 2021 | 286 | 0-2   | 0.00-0.70  | 0-0  | 0.00-0.00  |
|           | May 17 to May 23, 2021 | 306 | 0-26  | 0.00-9.29  | 0-0  | 0.00-0.00  |
|           | May 24 to May 30, 2021 | 272 | 0-0   | 0.00-0.00  | 0-4  | 0.00-1.45  |
| Yamagata  |                        |     |       |            |      |            |
|           | Apr 5 to Apr 11, 2021  | 257 | 0-0   | 0.00-0.00  | 6-42 | 2.01-14.05 |
|           | Apr 12 to Apr 18, 2021 | 302 | 0-6   | 0.00-2.03  | 0-0  | 0.00-0.00  |
|           | Apr 19 to Apr 25, 2021 | 312 | 0-17  | 0.00-5.76  | 0-0  | 0.00-0.00  |
|           | Apr 26 to May 2, 2021  | 273 | 0-0   | 0.00-0.00  | 0-17 | 0.00-5.86  |
|           | May 3 to May 9, 2021   | 305 | 0-22  | 0.00-7.77  | 0-0  | 0.00-0.00  |
|           | May 10 to May 16, 2021 | 323 | 6-42  | 2.14-14.95 | 0-0  | 0.00-0.00  |
|           | May 17 to May 23, 2021 | 314 | 0-36  | 0.00-12.95 | 0-0  | 0.00-0.00  |
|           | May 24 to May 30, 2021 | 298 | 0-24  | 0.00-8.76  | 0-0  | 0.00-0.00  |
| Fukushima |                        |     |       |            |      |            |
|           | Apr 5 to Apr 11, 2021  | 463 | 0-0   | 0.00-0.00  | 0-9  | 0.00-1.91  |
|           | Apr 12 to Apr 18, 2021 | 492 | 0-24  | 0.00-5.13  | 0-0  | 0.00-0.00  |
|           | Apr 19 to Apr 25, 2021 | 468 | 0-8   | 0.00-1.74  | 0-0  | 0.00-0.00  |
|           | Apr 26 to May 2, 2021  | 491 | 0-40  | 0.00-8.87  | 0-0  | 0.00-0.00  |
|           | May 3 to May 9, 2021   | 478 | 0-33  | 0.00-7.42  | 0-0  | 0.00-0.00  |
|           | May 10 to May 16, 2021 | 472 | 0-32  | 0.00-7.27  | 0-0  | 0.00-0.00  |
|           | May 17 to May 23, 2021 | 451 | 0-17  | 0.00-3.92  | 0-0  | 0.00-0.00  |
|           | May 24 to May 30, 2021 | 431 | 0-0   | 0.00-0.00  | 0-0  | 0.00-0.00  |
| Ibaraki   |                        |     |       |            |      |            |
|           | Apr 5 to Apr 11, 2021  | 607 | 0-0   | 0.00-0.00  | 0-39 | 0.00-6.04  |
|           | Apr 12 to Apr 18, 2021 | 679 | 0-46  | 0.00-7.27  | 0-0  | 0.00-0.00  |
|           | Apr 19 to Apr 25, 2021 | 613 | 0-0   | 0.00-0.00  | 0-14 | 0.00-2.23  |
|           | Apr 26 to May 2, 2021  | 642 | 0-27  | 0.00-4.39  | 0-0  | 0.00-0.00  |
|           | May 3 to May 9, 2021   | 632 | 0-28  | 0.00-4.64  | 0-0  | 0.00-0.00  |
|           | May 10 to May 16, 2021 | 650 | 0-54  | 0.00-9.06  | 0-0  | 0.00-0.00  |
|           | May 17 to May 23, 2021 | 519 | 0-0   | 0.00-0.00  | 0-59 | 0.00-10.21 |
|           | May 24 to May 30, 2021 | 592 | 0-15  | 0.00-2.60  | 0-0  | 0.00-0.00  |
| Tochigi   |                        |     |       |            |      |            |
|           | Apr 5 to Apr 11, 2021  | 406 | 0-0   | 0.00-0.00  | 0-22 | 0.00-5.14  |
|           | Apr 12 to Apr 18, 2021 | 456 | 0-33  | 0.00-7.80  | 0-0  | 0.00-0.00  |
|           | Apr 19 to Apr 25, 2021 | 436 | 0-22  | 0.00-5.31  | 0-0  | 0.00-0.00  |
|           | Apr 26 to May 2, 2021  | 450 | 2-50  | 0.50-12.50 | 0-0  | 0.00-0.00  |
|           | May 3 to May 9, 2021   | 440 | 0-44  | 0.00-11.11 | 0-0  | 0.00-0.00  |
|           | May 10 to May 16, 2021 | 397 | 0-14  | 0.00-3.66  | 0-0  | 0.00-0.00  |

|          |                        |      |        |            |      |           |
|----------|------------------------|------|--------|------------|------|-----------|
|          | May 17 to May 23, 2021 | 395  | 0-21   | 0.00-5.61  | 0-0  | 0.00-0.00 |
|          | May 24 to May 30, 2021 | 416  | 0-44   | 0.00-11.83 | 0-0  | 0.00-0.00 |
| Gunma    |                        |      |        |            |      |           |
|          | Apr 5 to Apr 11, 2021  | 447  | 0-0    | 0.00-0.00  | 0-2  | 0.00-0.45 |
|          | Apr 12 to Apr 18, 2021 | 523  | 31-84  | 7.06-19.13 | 0-0  | 0.00-0.00 |
|          | Apr 19 to Apr 25, 2021 | 452  | 0-17   | 0.00-3.91  | 0-0  | 0.00-0.00 |
|          | Apr 26 to May 2, 2021  | 454  | 0-29   | 0.00-6.82  | 0-0  | 0.00-0.00 |
|          | May 3 to May 9, 2021   | 450  | 0-26   | 0.00-6.13  | 0-0  | 0.00-0.00 |
|          | May 10 to May 16, 2021 | 453  | 0-39   | 0.00-9.42  | 0-0  | 0.00-0.00 |
|          | May 17 to May 23, 2021 | 385  | 0-0    | 0.00-0.00  | 0-24 | 0.00-5.87 |
|          | May 24 to May 30, 2021 | 443  | 0-35   | 0.00-8.58  | 0-0  | 0.00-0.00 |
| Saitama  |                        |      |        |            |      |           |
|          | Apr 5 to Apr 11, 2021  | 1358 | 0-0    | 0.00-0.00  | 0-10 | 0.00-0.73 |
|          | Apr 12 to Apr 18, 2021 | 1408 | 0-60   | 0.00-4.45  | 0-0  | 0.00-0.00 |
|          | Apr 19 to Apr 25, 2021 | 1401 | 0-73   | 0.00-5.50  | 0-0  | 0.00-0.00 |
|          | Apr 26 to May 2, 2021  | 1508 | 84-198 | 6.41-15.11 | 0-0  | 0.00-0.00 |
|          | May 3 to May 9, 2021   | 1435 | 39-146 | 3.03-11.33 | 0-0  | 0.00-0.00 |
|          | May 10 to May 16, 2021 | 1371 | 0-104  | 0.00-8.21  | 0-0  | 0.00-0.00 |
|          | May 17 to May 23, 2021 | 1319 | 0-71   | 0.00-5.69  | 0-0  | 0.00-0.00 |
|          | May 24 to May 30, 2021 | 1293 | 0-57   | 0.00-4.61  | 0-0  | 0.00-0.00 |
| Chiba    |                        |      |        |            |      |           |
|          | Apr 5 to Apr 11, 2021  | 1278 | 0-76   | 0.00-6.32  | 0-0  | 0.00-0.00 |
|          | Apr 12 to Apr 18, 2021 | 1251 | 0-63   | 0.00-5.30  | 0-0  | 0.00-0.00 |
|          | Apr 19 to Apr 25, 2021 | 1198 | 0-23   | 0.00-1.96  | 0-0  | 0.00-0.00 |
|          | Apr 26 to May 2, 2021  | 1249 | 0-96   | 0.00-8.33  | 0-0  | 0.00-0.00 |
|          | May 3 to May 9, 2021   | 1230 | 5-100  | 0.44-8.85  | 0-0  | 0.00-0.00 |
|          | May 10 to May 16, 2021 | 1155 | 0-43   | 0.00-3.87  | 0-0  | 0.00-0.00 |
|          | May 17 to May 23, 2021 | 1083 | 0-0    | 0.00-0.00  | 0-18 | 0.00-1.63 |
|          | May 24 to May 30, 2021 | 1095 | 0-1    | 0.00-0.09  | 0-0  | 0.00-0.00 |
| Tokyo    |                        |      |        |            |      |           |
|          | Apr 5 to Apr 11, 2021  | 2288 | 0-0    | 0.00-0.00  | 0-41 | 0.00-1.76 |
|          | Apr 12 to Apr 18, 2021 | 2463 | 1-166  | 0.04-7.23  | 0-0  | 0.00-0.00 |
|          | Apr 19 to Apr 25, 2021 | 2504 | 85-244 | 3.76-10.80 | 0-0  | 0.00-0.00 |
|          | Apr 26 to May 2, 2021  | 2459 | 88-246 | 3.98-11.12 | 0-0  | 0.00-0.00 |
|          | May 3 to May 9, 2021   | 2360 | 10-173 | 0.46-7.91  | 0-0  | 0.00-0.00 |
|          | May 10 to May 16, 2021 | 2227 | 0-58   | 0.00-2.67  | 0-0  | 0.00-0.00 |
|          | May 17 to May 23, 2021 | 2178 | 0-30   | 0.00-1.40  | 0-0  | 0.00-0.00 |
|          | May 24 to May 30, 2021 | 2162 | 0-37   | 0.00-1.74  | 0-0  | 0.00-0.00 |
| Kanagawa |                        |      |        |            |      |           |
|          | Apr 5 to Apr 11, 2021  | 1666 | 0-40   | 0.00-2.46  | 0-0  | 0.00-0.00 |
|          | Apr 12 to Apr 18, 2021 | 1702 | 0-85   | 0.00-5.26  | 0-0  | 0.00-0.00 |
|          | Apr 19 to Apr 25, 2021 | 1675 | 0-81   | 0.00-5.08  | 0-0  | 0.00-0.00 |
|          | Apr 26 to May 2, 2021  | 1755 | 65-182 | 4.13-11.57 | 0-0  | 0.00-0.00 |
|          | May 3 to May 9, 2021   | 1722 | 59-174 | 3.81-11.24 | 0-0  | 0.00-0.00 |
|          | May 10 to May 16, 2021 | 1647 | 0-114  | 0.00-7.44  | 0-0  | 0.00-0.00 |
|          | May 17 to May 23, 2021 | 1634 | 6-120  | 0.40-7.93  | 0-0  | 0.00-0.00 |

|                        |                        |      |           |             |           |            |
|------------------------|------------------------|------|-----------|-------------|-----------|------------|
| Niigata                | May 24 to May 30, 2021 | 1576 | 0-80      | 0.00-5.35   | 0-0       | 0.00-0.00  |
|                        | Apr 5 to Apr 11, 2021  | 581  | 0-0       | 0.00-0.00   | 0-6       | 0.00-1.02  |
|                        | Apr 12 to Apr 18, 2021 | 619  | 0-34      | 0.00-5.81   | 0-0       | 0.00-0.00  |
|                        | Apr 19 to Apr 25, 2021 | 579  | 0-0       | 0.00-0.00   | 0-2       | 0.00-0.34  |
|                        | Apr 26 to May 2, 2021  | 591  | 0-19      | 0.00-3.32   | 0-0       | 0.00-0.00  |
|                        | May 3 to May 9, 2021   | 574  | 0-11      | 0.00-1.95   | 0-0       | 0.00-0.00  |
|                        | May 10 to May 16, 2021 | 573  | 0-20      | 0.00-3.62   | 0-0       | 0.00-0.00  |
|                        | May 17 to May 23, 2021 | 542  | 0-0       | 0.00-0.00   | 0-6       | 0.00-1.09  |
| May 24 to May 30, 2021 | 560                    | 0-19 | 0.00-3.51 | 0-0         | 0.00-0.00 |            |
| Toyama                 | Apr 5 to Apr 11, 2021  | 284  | 1-36      | 0.40-14.52  | 0-0       | 0.00-0.00  |
|                        | Apr 12 to Apr 18, 2021 | 277  | 0-29      | 0.00-11.69  | 0-0       | 0.00-0.00  |
|                        | Apr 19 to Apr 25, 2021 | 274  | 0-31      | 0.00-12.76  | 0-0       | 0.00-0.00  |
|                        | Apr 26 to May 2, 2021  | 271  | 0-30      | 0.00-12.45  | 0-0       | 0.00-0.00  |
|                        | May 3 to May 9, 2021   | 273  | 0-34      | 0.00-14.23  | 0-0       | 0.00-0.00  |
|                        | May 10 to May 16, 2021 | 238  | 0-5       | 0.00-2.15   | 0-0       | 0.00-0.00  |
|                        | May 17 to May 23, 2021 | 203  | 0-0       | 0.00-0.00   | 0-29      | 0.00-12.50 |
|                        | May 24 to May 30, 2021 | 248  | 0-18      | 0.00-7.83   | 0-0       | 0.00-0.00  |
| Ishikawa               | Apr 5 to Apr 11, 2021  | 268  | 0-22      | 0.00-8.94   | 0-0       | 0.00-0.00  |
|                        | Apr 12 to Apr 18, 2021 | 285  | 9-40      | 3.67-16.33  | 0-0       | 0.00-0.00  |
|                        | Apr 19 to Apr 25, 2021 | 257  | 0-14      | 0.00-5.76   | 0-0       | 0.00-0.00  |
|                        | Apr 26 to May 2, 2021  | 254  | 0-16      | 0.00-6.72   | 0-0       | 0.00-0.00  |
|                        | May 3 to May 9, 2021   | 280  | 13-45     | 5.53-19.15  | 0-0       | 0.00-0.00  |
|                        | May 10 to May 16, 2021 | 261  | 0-28      | 0.00-12.02  | 0-0       | 0.00-0.00  |
|                        | May 17 to May 23, 2021 | 242  | 0-13      | 0.00-5.68   | 0-0       | 0.00-0.00  |
|                        | May 24 to May 30, 2021 | 220  | 0-0       | 0.00-0.00   | 0-7       | 0.00-3.08  |
| Fukui                  | Apr 5 to Apr 11, 2021  | 193  | 0-14      | 0.00-7.82   | 0-0       | 0.00-0.00  |
|                        | Apr 12 to Apr 18, 2021 | 194  | 0-15      | 0.00-8.38   | 0-0       | 0.00-0.00  |
|                        | Apr 19 to Apr 25, 2021 | 189  | 0-12      | 0.00-6.78   | 0-0       | 0.00-0.00  |
|                        | Apr 26 to May 2, 2021  | 204  | 3-33      | 1.75-19.30  | 0-0       | 0.00-0.00  |
|                        | May 3 to May 9, 2021   | 217  | 21-50     | 12.57-29.94 | 0-0       | 0.00-0.00  |
|                        | May 10 to May 16, 2021 | 181  | 0-16      | 0.00-9.70   | 0-0       | 0.00-0.00  |
|                        | May 17 to May 23, 2021 | 193  | 0-29      | 0.00-17.68  | 0-0       | 0.00-0.00  |
|                        | May 24 to May 30, 2021 | 172  | 0-11      | 0.00-6.83   | 0-0       | 0.00-0.00  |
| Yamanashi              | Apr 5 to Apr 11, 2021  | 176  | 0-0       | 0.00-0.00   | 0-17      | 0.00-8.81  |
|                        | Apr 12 to Apr 18, 2021 | 194  | 0-4       | 0.00-2.11   | 0-0       | 0.00-0.00  |
|                        | Apr 19 to Apr 25, 2021 | 205  | 0-20      | 0.00-10.81  | 0-0       | 0.00-0.00  |
|                        | Apr 26 to May 2, 2021  | 207  | 0-24      | 0.00-13.11  | 0-0       | 0.00-0.00  |
|                        | May 3 to May 9, 2021   | 209  | 1-30      | 0.56-16.76  | 0-0       | 0.00-0.00  |
|                        | May 10 to May 16, 2021 | 193  | 0-16      | 0.00-9.04   | 0-0       | 0.00-0.00  |
|                        | May 17 to May 23, 2021 | 213  | 5-36      | 2.82-20.34  | 0-0       | 0.00-0.00  |
|                        | May 24 to May 30, 2021 | 179  | 0-7       | 0.00-4.07   | 0-0       | 0.00-0.00  |



Nagano

|                        |     |      |           |      |           |
|------------------------|-----|------|-----------|------|-----------|
| Apr 5 to Apr 11, 2021  | 495 | 0-0  | 0.00-0.00 | 0-5  | 0.00-1.00 |
| Apr 12 to Apr 18, 2021 | 508 | 0-15 | 0.00-3.04 | 0-0  | 0.00-0.00 |
| Apr 19 to Apr 25, 2021 | 490 | 0-3  | 0.00-0.62 | 0-0  | 0.00-0.00 |
| Apr 26 to May 2, 2021  | 525 | 0-44 | 0.00-9.15 | 0-0  | 0.00-0.00 |
| May 3 to May 9, 2021   | 459 | 0-0  | 0.00-0.00 | 0-10 | 0.00-2.13 |
| May 10 to May 16, 2021 | 497 | 0-32 | 0.00-6.88 | 0-0  | 0.00-0.00 |
| May 17 to May 23, 2021 | 475 | 0-16 | 0.00-3.49 | 0-0  | 0.00-0.00 |
| May 24 to May 30, 2021 | 415 | 0-0  | 0.00-0.00 | 0-35 | 0.00-7.78 |

Gifu

|                        |     |       |            |      |           |
|------------------------|-----|-------|------------|------|-----------|
| Apr 5 to Apr 11, 2021  | 438 | 0-0   | 0.00-0.00  | 0-12 | 0.00-2.67 |
| Apr 12 to Apr 18, 2021 | 449 | 0-14  | 0.00-3.22  | 0-0  | 0.00-0.00 |
| Apr 19 to Apr 25, 2021 | 466 | 0-37  | 0.00-8.62  | 0-0  | 0.00-0.00 |
| Apr 26 to May 2, 2021  | 435 | 0-17  | 0.00-4.07  | 0-0  | 0.00-0.00 |
| May 3 to May 9, 2021   | 451 | 0-41  | 0.00-10.00 | 0-0  | 0.00-0.00 |
| May 10 to May 16, 2021 | 457 | 2-51  | 0.49-12.56 | 0-0  | 0.00-0.00 |
| May 17 to May 23, 2021 | 465 | 15-65 | 3.75-16.25 | 0-0  | 0.00-0.00 |
| May 24 to May 30, 2021 | 384 | 0-0   | 0.00-0.00  | 0-13 | 0.00-3.27 |

Shizuoka

|                        |     |      |           |     |           |
|------------------------|-----|------|-----------|-----|-----------|
| Apr 5 to Apr 11, 2021  | 860 | 0-37 | 0.00-4.50 | 0-0 | 0.00-0.00 |
| Apr 12 to Apr 18, 2021 | 815 | 0-6  | 0.00-0.74 | 0-0 | 0.00-0.00 |
| Apr 19 to Apr 25, 2021 | 815 | 0-19 | 0.00-2.39 | 0-0 | 0.00-0.00 |
| Apr 26 to May 2, 2021  | 858 | 0-76 | 0.00-9.72 | 0-0 | 0.00-0.00 |
| May 3 to May 9, 2021   | 813 | 0-45 | 0.00-5.86 | 0-0 | 0.00-0.00 |
| May 10 to May 16, 2021 | 798 | 0-41 | 0.00-5.42 | 0-0 | 0.00-0.00 |
| May 17 to May 23, 2021 | 815 | 0-74 | 0.00-9.99 | 0-0 | 0.00-0.00 |
| May 24 to May 30, 2021 | 734 | 0-0  | 0.00-0.00 | 0-4 | 0.00-0.54 |

Aichi

|                        |      |        |            |      |           |
|------------------------|------|--------|------------|------|-----------|
| Apr 5 to Apr 11, 2021  | 1278 | 0-0    | 0.00-0.00  | 0-97 | 0.00-7.05 |
| Apr 12 to Apr 18, 2021 | 1368 | 0-11   | 0.00-0.81  | 0-0  | 0.00-0.00 |
| Apr 19 to Apr 25, 2021 | 1389 | 0-50   | 0.00-3.73  | 0-0  | 0.00-0.00 |
| Apr 26 to May 2, 2021  | 1405 | 0-83   | 0.00-6.28  | 0-0  | 0.00-0.00 |
| May 3 to May 9, 2021   | 1344 | 0-41   | 0.00-3.15  | 0-0  | 0.00-0.00 |
| May 10 to May 16, 2021 | 1422 | 40-152 | 3.15-11.97 | 0-0  | 0.00-0.00 |
| May 17 to May 23, 2021 | 1206 | 0-0    | 0.00-0.00  | 0-45 | 0.00-3.60 |
| May 24 to May 30, 2021 | 1274 | 0-39   | 0.00-3.16  | 0-0  | 0.00-0.00 |

Mie

|                        |     |       |            |     |           |
|------------------------|-----|-------|------------|-----|-----------|
| Apr 5 to Apr 11, 2021  | 401 | 0-0   | 0.00-0.00  | 0-6 | 0.00-1.47 |
| Apr 12 to Apr 18, 2021 | 418 | 0-19  | 0.00-4.76  | 0-0 | 0.00-0.00 |
| Apr 19 to Apr 25, 2021 | 409 | 0-21  | 0.00-5.41  | 0-0 | 0.00-0.00 |
| Apr 26 to May 2, 2021  | 429 | 5-49  | 1.32-12.89 | 0-0 | 0.00-0.00 |
| May 3 to May 9, 2021   | 400 | 0-26  | 0.00-6.95  | 0-0 | 0.00-0.00 |
| May 10 to May 16, 2021 | 410 | 0-40  | 0.00-10.81 | 0-0 | 0.00-0.00 |
| May 17 to May 23, 2021 | 417 | 10-55 | 2.76-15.19 | 0-0 | 0.00-0.00 |
| May 24 to May 30, 2021 | 356 | 0-0   | 0.00-0.00  | 0-4 | 0.00-1.11 |

Shiga

|          |                        |      |        |            |     |           |
|----------|------------------------|------|--------|------------|-----|-----------|
|          | Apr 5 to Apr 11, 2021  | 289  | 0-34   | 0.00-13.33 | 0-0 | 0.00-0.00 |
|          | Apr 12 to Apr 18, 2021 | 285  | 0-32   | 0.00-12.65 | 0-0 | 0.00-0.00 |
|          | Apr 19 to Apr 25, 2021 | 250  | 0-2    | 0.00-0.81  | 0-0 | 0.00-0.00 |
|          | Apr 26 to May 2, 2021  | 286  | 7-42   | 2.87-17.21 | 0-0 | 0.00-0.00 |
|          | May 3 to May 9, 2021   | 273  | 0-33   | 0.00-13.75 | 0-0 | 0.00-0.00 |
|          | May 10 to May 16, 2021 | 256  | 0-23   | 0.00-9.87  | 0-0 | 0.00-0.00 |
|          | May 17 to May 23, 2021 | 252  | 0-22   | 0.00-9.57  | 0-0 | 0.00-0.00 |
|          | May 24 to May 30, 2021 | 261  | 0-34   | 0.00-14.98 | 0-0 | 0.00-0.00 |
| Kyoto    |                        |      |        |            |     |           |
|          | Apr 5 to Apr 11, 2021  | 531  | 0-1    | 0.00-0.19  | 0-0 | 0.00-0.00 |
|          | Apr 12 to Apr 18, 2021 | 536  | 0-13   | 0.00-2.49  | 0-0 | 0.00-0.00 |
|          | Apr 19 to Apr 25, 2021 | 556  | 0-41   | 0.00-7.96  | 0-0 | 0.00-0.00 |
|          | Apr 26 to May 2, 2021  | 552  | 0-43   | 0.00-8.45  | 0-0 | 0.00-0.00 |
|          | May 3 to May 9, 2021   | 559  | 1-55   | 0.20-10.91 | 0-0 | 0.00-0.00 |
|          | May 10 to May 16, 2021 | 527  | 0-35   | 0.00-7.11  | 0-0 | 0.00-0.00 |
|          | May 17 to May 23, 2021 | 479  | 0-0    | 0.00-0.00  | 0-5 | 0.00-1.03 |
|          | May 24 to May 30, 2021 | 508  | 0-31   | 0.00-6.50  | 0-0 | 0.00-0.00 |
| Osaka    |                        |      |        |            |     |           |
|          | Apr 5 to Apr 11, 2021  | 1830 | 0-35   | 0.00-1.95  | 0-0 | 0.00-0.00 |
|          | Apr 12 to Apr 18, 2021 | 1792 | 0-13   | 0.00-0.73  | 0-0 | 0.00-0.00 |
|          | Apr 19 to Apr 25, 2021 | 1946 | 55-194 | 3.14-11.07 | 0-0 | 0.00-0.00 |
|          | Apr 26 to May 2, 2021  | 1853 | 0-131  | 0.00-7.61  | 0-0 | 0.00-0.00 |
|          | May 3 to May 9, 2021   | 1910 | 80-208 | 4.70-12.22 | 0-0 | 0.00-0.00 |
|          | May 10 to May 16, 2021 | 1838 | 23-155 | 1.37-9.21  | 0-0 | 0.00-0.00 |
|          | May 17 to May 23, 2021 | 1735 | 0-63   | 0.00-3.77  | 0-0 | 0.00-0.00 |
|          | May 24 to May 30, 2021 | 1707 | 0-58   | 0.00-3.52  | 0-0 | 0.00-0.00 |
| Hyogo    |                        |      |        |            |     |           |
|          | Apr 5 to Apr 11, 2021  | 1145 | 0-11   | 0.00-0.97  | 0-0 | 0.00-0.00 |
|          | Apr 12 to Apr 18, 2021 | 1173 | 0-52   | 0.00-4.64  | 0-0 | 0.00-0.00 |
|          | Apr 19 to Apr 25, 2021 | 1185 | 0-86   | 0.00-7.83  | 0-0 | 0.00-0.00 |
|          | Apr 26 to May 2, 2021  | 1226 | 52-150 | 4.83-13.94 | 0-0 | 0.00-0.00 |
|          | May 3 to May 9, 2021   | 1186 | 26-123 | 2.45-11.57 | 0-0 | 0.00-0.00 |
|          | May 10 to May 16, 2021 | 1157 | 12-104 | 1.14-9.88  | 0-0 | 0.00-0.00 |
|          | May 17 to May 23, 2021 | 1144 | 5-100  | 0.48-9.58  | 0-0 | 0.00-0.00 |
|          | May 24 to May 30, 2021 | 1095 | 0-66   | 0.00-6.41  | 0-0 | 0.00-0.00 |
| Nara     |                        |      |        |            |     |           |
|          | Apr 5 to Apr 11, 2021  | 277  | 0-0    | 0.00-0.00  | 0-9 | 0.00-3.15 |
|          | Apr 12 to Apr 18, 2021 | 306  | 0-22   | 0.00-7.75  | 0-0 | 0.00-0.00 |
|          | Apr 19 to Apr 25, 2021 | 316  | 0-35   | 0.00-12.46 | 0-0 | 0.00-0.00 |
|          | Apr 26 to May 2, 2021  | 291  | 0-14   | 0.00-5.05  | 0-0 | 0.00-0.00 |
|          | May 3 to May 9, 2021   | 263  | 0-0    | 0.00-0.00  | 0-9 | 0.00-3.31 |
|          | May 10 to May 16, 2021 | 298  | 0-29   | 0.00-10.78 | 0-0 | 0.00-0.00 |
|          | May 17 to May 23, 2021 | 267  | 0-2    | 0.00-0.75  | 0-0 | 0.00-0.00 |
|          | May 24 to May 30, 2021 | 271  | 0-9    | 0.00-3.44  | 0-0 | 0.00-0.00 |
| Wakayama |                        |      |        |            |     |           |
|          | Apr 5 to Apr 11, 2021  | 241  | 0-0    | 0.00-0.00  | 0-4 | 0.00-1.63 |

|           |                        |     |       |            |      |            |
|-----------|------------------------|-----|-------|------------|------|------------|
|           | Apr 12 to Apr 18, 2021 | 254 | 0-11  | 0.00-4.53  | 0-0  | 0.00-0.00  |
|           | Apr 19 to Apr 25, 2021 | 263 | 0-25  | 0.00-10.50 | 0-0  | 0.00-0.00  |
|           | Apr 26 to May 2, 2021  | 239 | 0-4   | 0.00-1.70  | 0-0  | 0.00-0.00  |
|           | May 3 to May 9, 2021   | 250 | 0-22  | 0.00-9.65  | 0-0  | 0.00-0.00  |
|           | May 10 to May 16, 2021 | 230 | 0-9   | 0.00-4.07  | 0-0  | 0.00-0.00  |
|           | May 17 to May 23, 2021 | 210 | 0-0   | 0.00-0.00  | 0-8  | 0.00-3.67  |
|           | May 24 to May 30, 2021 | 219 | 0-3   | 0.00-1.39  | 0-0  | 0.00-0.00  |
| Tottori   |                        |     |       |            |      |            |
|           | Apr 5 to Apr 11, 2021  | 144 | 0-4   | 0.00-2.86  | 0-0  | 0.00-0.00  |
|           | Apr 12 to Apr 18, 2021 | 158 | 0-20  | 0.00-14.49 | 0-0  | 0.00-0.00  |
|           | Apr 19 to Apr 25, 2021 | 147 | 0-12  | 0.00-8.89  | 0-0  | 0.00-0.00  |
|           | Apr 26 to May 2, 2021  | 132 | 0-0   | 0.00-0.00  | 0-0  | 0.00-0.00  |
|           | May 3 to May 9, 2021   | 156 | 1-24  | 0.76-18.18 | 0-0  | 0.00-0.00  |
|           | May 10 to May 16, 2021 | 162 | 9-32  | 6.92-24.62 | 0-0  | 0.00-0.00  |
|           | May 17 to May 23, 2021 | 137 | 0-9   | 0.00-7.03  | 0-0  | 0.00-0.00  |
|           | May 24 to May 30, 2021 | 137 | 0-12  | 0.00-9.60  | 0-0  | 0.00-0.00  |
| Shimane   |                        |     |       |            |      |            |
|           | Apr 5 to Apr 11, 2021  | 160 | 0-0   | 0.00-0.00  | 3-30 | 1.58-15.79 |
|           | Apr 12 to Apr 18, 2021 | 220 | 5-34  | 2.69-18.28 | 0-0  | 0.00-0.00  |
|           | Apr 19 to Apr 25, 2021 | 189 | 0-4   | 0.00-2.16  | 0-0  | 0.00-0.00  |
|           | Apr 26 to May 2, 2021  | 194 | 0-14  | 0.00-7.78  | 0-0  | 0.00-0.00  |
|           | May 3 to May 9, 2021   | 202 | 0-27  | 0.00-15.43 | 0-0  | 0.00-0.00  |
|           | May 10 to May 16, 2021 | 183 | 0-12  | 0.00-7.02  | 0-0  | 0.00-0.00  |
|           | May 17 to May 23, 2021 | 186 | 0-19  | 0.00-11.38 | 0-0  | 0.00-0.00  |
|           | May 24 to May 30, 2021 | 178 | 0-13  | 0.00-7.88  | 0-0  | 0.00-0.00  |
| Okayama   |                        |     |       |            |      |            |
|           | Apr 5 to Apr 11, 2021  | 421 | 0-2   | 0.00-0.48  | 0-0  | 0.00-0.00  |
|           | Apr 12 to Apr 18, 2021 | 421 | 0-10  | 0.00-2.43  | 0-0  | 0.00-0.00  |
|           | Apr 19 to Apr 25, 2021 | 441 | 0-33  | 0.00-8.09  | 0-0  | 0.00-0.00  |
|           | Apr 26 to May 2, 2021  | 426 | 0-22  | 0.00-5.45  | 0-0  | 0.00-0.00  |
|           | May 3 to May 9, 2021   | 409 | 0-10  | 0.00-2.51  | 0-0  | 0.00-0.00  |
|           | May 10 to May 16, 2021 | 454 | 11-58 | 2.78-14.65 | 0-0  | 0.00-0.00  |
|           | May 17 to May 23, 2021 | 390 | 0-0   | 0.00-0.00  | 0-0  | 0.00-0.00  |
|           | May 24 to May 30, 2021 | 412 | 0-29  | 0.00-7.57  | 0-0  | 0.00-0.00  |
| Hiroshima |                        |     |       |            |      |            |
|           | Apr 5 to Apr 11, 2021  | 617 | 0-26  | 0.00-4.40  | 0-0  | 0.00-0.00  |
|           | Apr 12 to Apr 18, 2021 | 599 | 0-15  | 0.00-2.57  | 0-0  | 0.00-0.00  |
|           | Apr 19 to Apr 25, 2021 | 635 | 0-63  | 0.00-11.01 | 0-0  | 0.00-0.00  |
|           | Apr 26 to May 2, 2021  | 614 | 0-49  | 0.00-8.67  | 0-0  | 0.00-0.00  |
|           | May 3 to May 9, 2021   | 636 | 20-82 | 3.61-14.80 | 0-0  | 0.00-0.00  |
|           | May 10 to May 16, 2021 | 611 | 1-62  | 0.18-11.29 | 0-0  | 0.00-0.00  |
|           | May 17 to May 23, 2021 | 584 | 0-46  | 0.00-8.55  | 0-0  | 0.00-0.00  |
|           | May 24 to May 30, 2021 | 541 | 0-12  | 0.00-2.27  | 0-0  | 0.00-0.00  |
| Yamaguchi |                        |     |       |            |      |            |
|           | Apr 5 to Apr 11, 2021  | 346 | 0-0   | 0.00-0.00  | 0-15 | 0.00-4.16  |
|           | Apr 12 to Apr 18, 2021 | 382 | 0-28  | 0.00-7.91  | 0-0  | 0.00-0.00  |

|           |                        |      |        |             |      |           |
|-----------|------------------------|------|--------|-------------|------|-----------|
|           | Apr 19 to Apr 25, 2021 | 395  | 2-45   | 0.57-12.86  | 0-0  | 0.00-0.00 |
|           | Apr 26 to May 2, 2021  | 390  | 2-43   | 0.58-12.39  | 0-0  | 0.00-0.00 |
|           | May 3 to May 9, 2021   | 369  | 0-28   | 0.00-8.21   | 0-0  | 0.00-0.00 |
|           | May 10 to May 16, 2021 | 325  | 0-0    | 0.00-0.00   | 0-13 | 0.00-3.85 |
|           | May 17 to May 23, 2021 | 363  | 0-28   | 0.00-8.36   | 0-0  | 0.00-0.00 |
|           | May 24 to May 30, 2021 | 363  | 0-36   | 0.00-11.01  | 0-0  | 0.00-0.00 |
| Tokushima |                        |      |        |             |      |           |
|           | Apr 5 to Apr 11, 2021  | 206  | 0-15   | 0.00-7.85   | 0-0  | 0.00-0.00 |
|           | Apr 12 to Apr 18, 2021 | 188  | 0-0    | 0.00-0.00   | 0-1  | 0.00-0.53 |
|           | Apr 19 to Apr 25, 2021 | 242  | 28-58  | 15.22-31.52 | 0-0  | 0.00-0.00 |
|           | Apr 26 to May 2, 2021  | 190  | 0-11   | 0.00-6.15   | 0-0  | 0.00-0.00 |
|           | May 3 to May 9, 2021   | 209  | 3-32   | 1.69-18.08  | 0-0  | 0.00-0.00 |
|           | May 10 to May 16, 2021 | 215  | 8-37   | 4.49-20.79  | 0-0  | 0.00-0.00 |
|           | May 17 to May 23, 2021 | 173  | 0-1    | 0.00-0.58   | 0-0  | 0.00-0.00 |
|           | May 24 to May 30, 2021 | 176  | 0-6    | 0.00-3.53   | 0-0  | 0.00-0.00 |
| Kagawa    |                        |      |        |             |      |           |
|           | Apr 5 to Apr 11, 2021  | 233  | 0-0    | 0.00-0.00   | 0-8  | 0.00-3.32 |
|           | Apr 12 to Apr 18, 2021 | 256  | 0-18   | 0.00-7.56   | 0-0  | 0.00-0.00 |
|           | Apr 19 to Apr 25, 2021 | 227  | 0-0    | 0.00-0.00   | 0-7  | 0.00-2.99 |
|           | Apr 26 to May 2, 2021  | 254  | 0-25   | 0.00-10.92  | 0-0  | 0.00-0.00 |
|           | May 3 to May 9, 2021   | 232  | 0-7    | 0.00-3.11   | 0-0  | 0.00-0.00 |
|           | May 10 to May 16, 2021 | 223  | 0-5    | 0.00-2.29   | 0-0  | 0.00-0.00 |
|           | May 17 to May 23, 2021 | 221  | 0-5    | 0.00-2.31   | 0-0  | 0.00-0.00 |
|           | May 24 to May 30, 2021 | 223  | 0-15   | 0.00-7.21   | 0-0  | 0.00-0.00 |
| Ehime     |                        |      |        |             |      |           |
|           | Apr 5 to Apr 11, 2021  | 350  | 0-6    | 0.00-1.74   | 0-0  | 0.00-0.00 |
|           | Apr 12 to Apr 18, 2021 | 372  | 0-32   | 0.00-9.41   | 0-0  | 0.00-0.00 |
|           | Apr 19 to Apr 25, 2021 | 372  | 0-38   | 0.00-11.38  | 0-0  | 0.00-0.00 |
|           | Apr 26 to May 2, 2021  | 368  | 0-39   | 0.00-11.85  | 0-0  | 0.00-0.00 |
|           | May 3 to May 9, 2021   | 355  | 0-30   | 0.00-9.23   | 0-0  | 0.00-0.00 |
|           | May 10 to May 16, 2021 | 365  | 5-46   | 1.57-14.42  | 0-0  | 0.00-0.00 |
|           | May 17 to May 23, 2021 | 303  | 0-0    | 0.00-0.00   | 0-10 | 0.00-3.19 |
|           | May 24 to May 30, 2021 | 333  | 0-24   | 0.00-7.77   | 0-0  | 0.00-0.00 |
| Kochi     |                        |      |        |             |      |           |
|           | Apr 5 to Apr 11, 2021  | 193  | 0-5    | 0.00-2.66   | 0-0  | 0.00-0.00 |
|           | Apr 12 to Apr 18, 2021 | 199  | 0-12   | 0.00-6.42   | 0-0  | 0.00-0.00 |
|           | Apr 19 to Apr 25, 2021 | 209  | 0-25   | 0.00-13.59  | 0-0  | 0.00-0.00 |
|           | Apr 26 to May 2, 2021  | 196  | 0-14   | 0.00-7.69   | 0-0  | 0.00-0.00 |
|           | May 3 to May 9, 2021   | 177  | 0-0    | 0.00-0.00   | 0-1  | 0.00-0.56 |
|           | May 10 to May 16, 2021 | 193  | 0-16   | 0.00-9.04   | 0-0  | 0.00-0.00 |
|           | May 17 to May 23, 2021 | 194  | 0-20   | 0.00-11.49  | 0-0  | 0.00-0.00 |
|           | May 24 to May 30, 2021 | 203  | 1-31   | 0.58-18.02  | 0-0  | 0.00-0.00 |
| Fukuoka   |                        |      |        |             |      |           |
|           | Apr 5 to Apr 11, 2021  | 1001 | 0-0    | 0.00-0.00   | 0-44 | 0.00-4.21 |
|           | Apr 12 to Apr 18, 2021 | 1058 | 0-25   | 0.00-2.42   | 0-0  | 0.00-0.00 |
|           | Apr 19 to Apr 25, 2021 | 1161 | 54-142 | 5.30-13.94  | 0-0  | 0.00-0.00 |

|          |                        |      |        |             |      |           |
|----------|------------------------|------|--------|-------------|------|-----------|
|          | Apr 26 to May 2, 2021  | 1087 | 0-82   | 0.00-8.16   | 0-0  | 0.00-0.00 |
|          | May 3 to May 9, 2021   | 1068 | 3-82   | 0.30-8.32   | 0-0  | 0.00-0.00 |
|          | May 10 to May 16, 2021 | 1082 | 19-105 | 1.94-10.75  | 0-0  | 0.00-0.00 |
|          | May 17 to May 23, 2021 | 991  | 0-30   | 0.00-3.12   | 0-0  | 0.00-0.00 |
|          | May 24 to May 30, 2021 | 1010 | 0-58   | 0.00-6.09   | 0-0  | 0.00-0.00 |
| Saga     |                        |      |        |             |      |           |
|          | Apr 5 to Apr 11, 2021  | 193  | 0-4    | 0.00-2.12   | 0-0  | 0.00-0.00 |
|          | Apr 12 to Apr 18, 2021 | 199  | 0-13   | 0.00-6.99   | 0-0  | 0.00-0.00 |
|          | Apr 19 to Apr 25, 2021 | 205  | 0-21   | 0.00-11.41  | 0-0  | 0.00-0.00 |
|          | Apr 26 to May 2, 2021  | 171  | 0-0    | 0.00-0.00   | 0-10 | 0.00-5.52 |
|          | May 3 to May 9, 2021   | 222  | 16-44  | 8.99-24.72  | 0-0  | 0.00-0.00 |
|          | May 10 to May 16, 2021 | 194  | 0-17   | 0.00-9.60   | 0-0  | 0.00-0.00 |
|          | May 17 to May 23, 2021 | 185  | 0-8    | 0.00-4.52   | 0-0  | 0.00-0.00 |
|          | May 24 to May 30, 2021 | 173  | 0-0    | 0.00-0.00   | 0-3  | 0.00-1.70 |
| Nagasaki |                        |      |        |             |      |           |
|          | Apr 5 to Apr 11, 2021  | 350  | 0-7    | 0.00-2.04   | 0-0  | 0.00-0.00 |
|          | Apr 12 to Apr 18, 2021 | 331  | 0-0    | 0.00-0.00   | 0-9  | 0.00-2.65 |
|          | Apr 19 to Apr 25, 2021 | 369  | 0-34   | 0.00-10.15  | 0-0  | 0.00-0.00 |
|          | Apr 26 to May 2, 2021  | 328  | 0-2    | 0.00-0.61   | 0-0  | 0.00-0.00 |
|          | May 3 to May 9, 2021   | 373  | 12-50  | 3.72-15.48  | 0-0  | 0.00-0.00 |
|          | May 10 to May 16, 2021 | 361  | 4-42   | 1.25-13.17  | 0-0  | 0.00-0.00 |
|          | May 17 to May 23, 2021 | 299  | 0-0    | 0.00-0.00   | 0-14 | 0.00-4.47 |
|          | May 24 to May 30, 2021 | 378  | 33-73  | 10.82-23.93 | 0-0  | 0.00-0.00 |
| Kumamoto |                        |      |        |             |      |           |
|          | Apr 5 to Apr 11, 2021  | 430  | 0-26   | 0.00-6.44   | 0-0  | 0.00-0.00 |
|          | Apr 12 to Apr 18, 2021 | 453  | 9-54   | 2.26-13.53  | 0-0  | 0.00-0.00 |
|          | Apr 19 to Apr 25, 2021 | 444  | 6-50   | 1.52-12.69  | 0-0  | 0.00-0.00 |
|          | Apr 26 to May 2, 2021  | 422  | 0-30   | 0.00-7.65   | 0-0  | 0.00-0.00 |
|          | May 3 to May 9, 2021   | 422  | 0-38   | 0.00-9.90   | 0-0  | 0.00-0.00 |
|          | May 10 to May 16, 2021 | 418  | 0-40   | 0.00-10.58  | 0-0  | 0.00-0.00 |
|          | May 17 to May 23, 2021 | 395  | 0-21   | 0.00-5.61   | 0-0  | 0.00-0.00 |
|          | May 24 to May 30, 2021 | 404  | 0-35   | 0.00-9.49   | 0-0  | 0.00-0.00 |
| Oita     |                        |      |        |             |      |           |
|          | Apr 5 to Apr 11, 2021  | 257  | 0-0    | 0.00-0.00   | 0-18 | 0.00-6.55 |
|          | Apr 12 to Apr 18, 2021 | 309  | 1-37   | 0.37-13.60  | 0-0  | 0.00-0.00 |
|          | Apr 19 to Apr 25, 2021 | 326  | 24-58  | 8.96-21.64  | 0-0  | 0.00-0.00 |
|          | Apr 26 to May 2, 2021  | 279  | 0-12   | 0.00-4.49   | 0-0  | 0.00-0.00 |
|          | May 3 to May 9, 2021   | 272  | 0-11   | 0.00-4.21   | 0-0  | 0.00-0.00 |
|          | May 10 to May 16, 2021 | 309  | 15-49  | 5.77-18.85  | 0-0  | 0.00-0.00 |
|          | May 17 to May 23, 2021 | 245  | 0-0    | 0.00-0.00   | 0-13 | 0.00-5.04 |
|          | May 24 to May 30, 2021 | 252  | 0-0    | 0.00-0.00   | 0-0  | 0.00-0.00 |
| Miyazaki |                        |      |        |             |      |           |
|          | Apr 5 to Apr 11, 2021  | 271  | 0-6    | 0.00-2.26   | 0-0  | 0.00-0.00 |
|          | Apr 12 to Apr 18, 2021 | 262  | 0-0    | 0.00-0.00   | 0-2  | 0.00-0.76 |
|          | Apr 19 to Apr 25, 2021 | 307  | 16-48  | 6.18-18.53  | 0-0  | 0.00-0.00 |
|          | Apr 26 to May 2, 2021  | 271  | 0-13   | 0.00-5.04   | 0-0  | 0.00-0.00 |

|           |                        |     |      |            |      |           |
|-----------|------------------------|-----|------|------------|------|-----------|
|           | May 3 to May 9, 2021   | 288 | 0-32 | 0.00-12.50 | 0-0  | 0.00-0.00 |
|           | May 10 to May 16, 2021 | 264 | 0-12 | 0.00-4.76  | 0-0  | 0.00-0.00 |
|           | May 17 to May 23, 2021 | 263 | 0-13 | 0.00-5.20  | 0-0  | 0.00-0.00 |
|           | May 24 to May 30, 2021 | 248 | 0-1  | 0.00-0.40  | 0-0  | 0.00-0.00 |
| Kagoshima |                        |     |      |            |      |           |
|           | Apr 5 to Apr 11, 2021  | 443 | 0-41 | 0.00-10.20 | 0-0  | 0.00-0.00 |
|           | Apr 12 to Apr 18, 2021 | 393 | 0-0  | 0.00-0.00  | 0-3  | 0.00-0.76 |
|           | Apr 19 to Apr 25, 2021 | 444 | 8-55 | 2.06-14.14 | 0-0  | 0.00-0.00 |
|           | Apr 26 to May 2, 2021  | 384 | 0-1  | 0.00-0.26  | 0-0  | 0.00-0.00 |
|           | May 3 to May 9, 2021   | 401 | 0-20 | 0.00-5.25  | 0-0  | 0.00-0.00 |
|           | May 10 to May 16, 2021 | 377 | 0-0  | 0.00-0.00  | 0-0  | 0.00-0.00 |
|           | May 17 to May 23, 2021 | 393 | 0-19 | 0.00-5.08  | 0-0  | 0.00-0.00 |
|           | May 24 to May 30, 2021 | 400 | 0-32 | 0.00-8.70  | 0-0  | 0.00-0.00 |
| Okinawa   |                        |     |      |            |      |           |
|           | Apr 5 to Apr 11, 2021  | 261 | 0-20 | 0.00-8.30  | 0-0  | 0.00-0.00 |
|           | Apr 12 to Apr 18, 2021 | 261 | 0-20 | 0.00-8.30  | 0-0  | 0.00-0.00 |
|           | Apr 19 to Apr 25, 2021 | 257 | 0-21 | 0.00-8.90  | 0-0  | 0.00-0.00 |
|           | Apr 26 to May 2, 2021  | 248 | 0-14 | 0.00-5.98  | 0-0  | 0.00-0.00 |
|           | May 3 to May 9, 2021   | 224 | 0-0  | 0.00-0.00  | 0-10 | 0.00-4.27 |
|           | May 10 to May 16, 2021 | 254 | 0-21 | 0.00-9.01  | 0-0  | 0.00-0.00 |
|           | May 17 to May 23, 2021 | 244 | 0-11 | 0.00-4.72  | 0-0  | 0.00-0.00 |
|           | May 24 to May 30, 2021 | 248 | 0-18 | 0.00-7.83  | 0-0  | 0.00-0.00 |

---

**Table A.2: Weekly number of observed and excess/exiguous deaths in Japan and 47 prefectures for non-COVID-19-related deaths in hospitals and clinics from January 2020 through May 2021.**

| Prefecture | Week                   | Observed | Excess deaths | Percent excess | Exiguous deaths | Percent exiguous |
|------------|------------------------|----------|---------------|----------------|-----------------|------------------|
| Japan      |                        |          |               |                |                 |                  |
|            | Apr 5 to Apr 11, 2021  | 18186    | 0–0           | 0.00–0.00      | 0–481           | 0.00–2.58        |
|            | Apr 12 to Apr 18, 2021 | 18622    | 0–135         | 0.00–0.73      | 0–0             | 0.00–0.00        |
|            | Apr 19 to Apr 25, 2021 | 18851    | 0–620         | 0.00–3.40      | 0–0             | 0.00–0.00        |
|            | Apr 26 to May 2, 2021  | 18497    | 0–521         | 0.00–2.90      | 0–0             | 0.00–0.00        |
|            | May 3 to May 9, 2021   | 18452    | 0–884         | 0.00–5.03      | 0–0             | 0.00–0.00        |
|            | May 10 to May 16, 2021 | 17985    | 0–597         | 0.00–3.43      | 0–0             | 0.00–0.00        |
|            | May 17 to May 23, 2021 | 17130    | 0–41          | 0.00–0.24      | 0–0             | 0.00–0.00        |
|            | May 24 to May 30, 2021 | 17230    | 0–381         | 0.00–2.26      | 0–0             | 0.00–0.00        |
| Hokkaido   |                        |          |               |                |                 |                  |
|            | Apr 5 to Apr 11, 2021  | 986      | 0–0           | 0.00–0.00      | 0–19            | 0.00–1.89        |
|            | Apr 12 to Apr 18, 2021 | 978      | 0–0           | 0.00–0.00      | 0–16            | 0.00–1.61        |
|            | Apr 19 to Apr 25, 2021 | 1032     | 0–44          | 0.00–4.45      | 0–0             | 0.00–0.00        |
|            | Apr 26 to May 2, 2021  | 1021     | 0–44          | 0.00–4.50      | 0–0             | 0.00–0.00        |
|            | May 3 to May 9, 2021   | 1015     | 0–45          | 0.00–4.64      | 0–0             | 0.00–0.00        |
|            | May 10 to May 16, 2021 | 1031     | 0–65          | 0.00–6.73      | 0–0             | 0.00–0.00        |
|            | May 17 to May 23, 2021 | 1068     | 27–106        | 2.81–11.02     | 0–0             | 0.00–0.00        |
|            | May 24 to May 30, 2021 | 997      | 0–44          | 0.00–4.62      | 0–0             | 0.00–0.00        |
| Aomori     |                        |          |               |                |                 |                  |
|            | Apr 5 to Apr 11, 2021  | 262      | 0–10          | 0.00–3.97      | 0–0             | 0.00–0.00        |
|            | Apr 12 to Apr 18, 2021 | 255      | 0–3           | 0.00–1.19      | 0–0             | 0.00–0.00        |
|            | Apr 19 to Apr 25, 2021 | 246      | 0–0           | 0.00–0.00      | 0–4             | 0.00–1.60        |
|            | Apr 26 to May 2, 2021  | 255      | 0–6           | 0.00–2.41      | 0–0             | 0.00–0.00        |
|            | May 3 to May 9, 2021   | 252      | 0–8           | 0.00–3.28      | 0–0             | 0.00–0.00        |
|            | May 10 to May 16, 2021 | 268      | 0–30          | 0.00–12.61     | 0–0             | 0.00–0.00        |
|            | May 17 to May 23, 2021 | 242      | 0–5           | 0.00–2.11      | 0–0             | 0.00–0.00        |
|            | May 24 to May 30, 2021 | 220      | 0–0           | 0.00–0.00      | 0–15            | 0.00–6.38        |
| Iwate      |                        |          |               |                |                 |                  |
|            | Apr 5 to Apr 11, 2021  | 248      | 0–0           | 0.00–0.00      | 0–0             | 0.00–0.00        |
|            | Apr 12 to Apr 18, 2021 | 227      | 0–0           | 0.00–0.00      | 0–20            | 0.00–8.10        |
|            | Apr 19 to Apr 25, 2021 | 232      | 0–0           | 0.00–0.00      | 0–16            | 0.00–6.45        |
|            | Apr 26 to May 2, 2021  | 245      | 0–4           | 0.00–1.66      | 0–0             | 0.00–0.00        |
|            | May 3 to May 9, 2021   | 246      | 0–9           | 0.00–3.80      | 0–0             | 0.00–0.00        |
|            | May 10 to May 16, 2021 | 213      | 0–0           | 0.00–0.00      | 0–19            | 0.00–8.19        |
|            | May 17 to May 23, 2021 | 231      | 0–0           | 0.00–0.00      | 0–0             | 0.00–0.00        |
|            | May 24 to May 30, 2021 | 220      | 0–0           | 0.00–0.00      | 0–5             | 0.00–2.22        |
| Miyagi     |                        |          |               |                |                 |                  |
|            | Apr 5 to Apr 11, 2021  | 317      | 0–0           | 0.00–0.00      | 0–22            | 0.00–6.49        |
|            | Apr 12 to Apr 18, 2021 | 359      | 0–22          | 0.00–6.53      | 0–0             | 0.00–0.00        |
|            | Apr 19 to Apr 25, 2021 | 319      | 0–0           | 0.00–0.00      | 0–13            | 0.00–3.92        |
|            | Apr 26 to May 2, 2021  | 332      | 0–0           | 0.00–0.00      | 0–0             | 0.00–0.00        |
|            | May 3 to May 9, 2021   | 338      | 0–12          | 0.00–3.68      | 0–0             | 0.00–0.00        |

|           |                        |     |      |            |       |            |
|-----------|------------------------|-----|------|------------|-------|------------|
|           | May 10 to May 16, 2021 | 280 | 0-0  | 0.00-0.00  | 4-42  | 1.24-13.04 |
|           | May 17 to May 23, 2021 | 299 | 0-0  | 0.00-0.00  | 0-17  | 0.00-5.38  |
|           | May 24 to May 30, 2021 | 320 | 0-11 | 0.00-3.56  | 0-0   | 0.00-0.00  |
| Akita     |                        |     |      |            |       |            |
|           | Apr 5 to Apr 11, 2021  | 233 | 0-7  | 0.00-3.10  | 0-0   | 0.00-0.00  |
|           | Apr 12 to Apr 18, 2021 | 227 | 0-0  | 0.00-0.00  | 0-0   | 0.00-0.00  |
|           | Apr 19 to Apr 25, 2021 | 222 | 0-0  | 0.00-0.00  | 0-4   | 0.00-1.77  |
|           | Apr 26 to May 2, 2021  | 259 | 7-37 | 3.15-16.67 | 0-0   | 0.00-0.00  |
|           | May 3 to May 9, 2021   | 238 | 0-18 | 0.00-8.18  | 0-0   | 0.00-0.00  |
|           | May 10 to May 16, 2021 | 209 | 0-0  | 0.00-0.00  | 0-6   | 0.00-2.79  |
|           | May 17 to May 23, 2021 | 236 | 0-24 | 0.00-11.32 | 0-0   | 0.00-0.00  |
|           | May 24 to May 30, 2021 | 204 | 0-0  | 0.00-0.00  | 0-5   | 0.00-2.39  |
| Yamagata  |                        |     |      |            |       |            |
|           | Apr 5 to Apr 11, 2021  | 188 | 0-0  | 0.00-0.00  | 0-15  | 0.00-7.39  |
|           | Apr 12 to Apr 18, 2021 | 208 | 0-4  | 0.00-1.96  | 0-0   | 0.00-0.00  |
|           | Apr 19 to Apr 25, 2021 | 205 | 0-2  | 0.00-0.99  | 0-0   | 0.00-0.00  |
|           | Apr 26 to May 2, 2021  | 158 | 0-0  | 0.00-0.00  | 12-41 | 6.03-20.60 |
|           | May 3 to May 9, 2021   | 196 | 0-2  | 0.00-1.03  | 0-0   | 0.00-0.00  |
|           | May 10 to May 16, 2021 | 211 | 0-19 | 0.00-9.90  | 0-0   | 0.00-0.00  |
|           | May 17 to May 23, 2021 | 201 | 0-11 | 0.00-5.79  | 0-0   | 0.00-0.00  |
|           | May 24 to May 30, 2021 | 181 | 0-0  | 0.00-0.00  | 0-8   | 0.00-4.23  |
| Fukushima |                        |     |      |            |       |            |
|           | Apr 5 to Apr 11, 2021  | 322 | 0-0  | 0.00-0.00  | 0-14  | 0.00-4.17  |
|           | Apr 12 to Apr 18, 2021 | 322 | 0-0  | 0.00-0.00  | 0-12  | 0.00-3.59  |
|           | Apr 19 to Apr 25, 2021 | 333 | 0-3  | 0.00-0.91  | 0-0   | 0.00-0.00  |
|           | Apr 26 to May 2, 2021  | 331 | 0-9  | 0.00-2.80  | 0-0   | 0.00-0.00  |
|           | May 3 to May 9, 2021   | 337 | 0-19 | 0.00-5.97  | 0-0   | 0.00-0.00  |
|           | May 10 to May 16, 2021 | 326 | 0-14 | 0.00-4.49  | 0-0   | 0.00-0.00  |
|           | May 17 to May 23, 2021 | 317 | 0-10 | 0.00-3.26  | 0-0   | 0.00-0.00  |
|           | May 24 to May 30, 2021 | 305 | 0-0  | 0.00-0.00  | 0-0   | 0.00-0.00  |
| Ibaraki   |                        |     |      |            |       |            |
|           | Apr 5 to Apr 11, 2021  | 444 | 0-0  | 0.00-0.00  | 0-43  | 0.00-8.83  |
|           | Apr 12 to Apr 18, 2021 | 484 | 0-8  | 0.00-1.68  | 0-0   | 0.00-0.00  |
|           | Apr 19 to Apr 25, 2021 | 457 | 0-0  | 0.00-0.00  | 0-12  | 0.00-2.56  |
|           | Apr 26 to May 2, 2021  | 478 | 0-16 | 0.00-3.46  | 0-0   | 0.00-0.00  |
|           | May 3 to May 9, 2021   | 476 | 0-19 | 0.00-4.16  | 0-0   | 0.00-0.00  |
|           | May 10 to May 16, 2021 | 464 | 0-11 | 0.00-2.43  | 0-0   | 0.00-0.00  |
|           | May 17 to May 23, 2021 | 377 | 0-0  | 0.00-0.00  | 18-67 | 4.05-15.09 |
|           | May 24 to May 30, 2021 | 423 | 0-0  | 0.00-0.00  | 0-17  | 0.00-3.86  |
| Tochigi   |                        |     |      |            |       |            |
|           | Apr 5 to Apr 11, 2021  | 275 | 0-0  | 0.00-0.00  | 0-20  | 0.00-6.78  |
|           | Apr 12 to Apr 18, 2021 | 298 | 0-5  | 0.00-1.71  | 0-0   | 0.00-0.00  |
|           | Apr 19 to Apr 25, 2021 | 276 | 0-0  | 0.00-0.00  | 0-10  | 0.00-3.50  |
|           | Apr 26 to May 2, 2021  | 285 | 0-7  | 0.00-2.52  | 0-0   | 0.00-0.00  |
|           | May 3 to May 9, 2021   | 306 | 0-32 | 0.00-11.68 | 0-0   | 0.00-0.00  |
|           | May 10 to May 16, 2021 | 269 | 0-1  | 0.00-0.37  | 0-0   | 0.00-0.00  |



|          |                        |      |       |            |      |            |
|----------|------------------------|------|-------|------------|------|------------|
|          | May 17 to May 23, 2021 | 244  | 0-0   | 0.00-0.00  | 0-16 | 0.00-6.15  |
|          | May 24 to May 30, 2021 | 270  | 0-12  | 0.00-4.65  | 0-0  | 0.00-0.00  |
| Gunma    |                        |      |       |            |      |            |
|          | Apr 5 to Apr 11, 2021  | 301  | 0-0   | 0.00-0.00  | 0-10 | 0.00-3.22  |
|          | Apr 12 to Apr 18, 2021 | 356  | 10-50 | 3.27-16.34 | 0-0  | 0.00-0.00  |
|          | Apr 19 to Apr 25, 2021 | 262  | 0-0   | 0.00-0.00  | 4-41 | 1.32-13.53 |
|          | Apr 26 to May 2, 2021  | 300  | 0-4   | 0.00-1.35  | 0-0  | 0.00-0.00  |
|          | May 3 to May 9, 2021   | 304  | 0-7   | 0.00-2.36  | 0-0  | 0.00-0.00  |
|          | May 10 to May 16, 2021 | 316  | 0-26  | 0.00-8.97  | 0-0  | 0.00-0.00  |
|          | May 17 to May 23, 2021 | 268  | 0-0   | 0.00-0.00  | 0-15 | 0.00-5.30  |
|          | May 24 to May 30, 2021 | 299  | 0-18  | 0.00-6.41  | 0-0  | 0.00-0.00  |
| Saitama  |                        |      |       |            |      |            |
|          | Apr 5 to Apr 11, 2021  | 943  | 0-0   | 0.00-0.00  | 0-20 | 0.00-2.08  |
|          | Apr 12 to Apr 18, 2021 | 958  | 0-10  | 0.00-1.05  | 0-0  | 0.00-0.00  |
|          | Apr 19 to Apr 25, 2021 | 968  | 0-39  | 0.00-4.20  | 0-0  | 0.00-0.00  |
|          | Apr 26 to May 2, 2021  | 1008 | 3-88  | 0.33-9.57  | 0-0  | 0.00-0.00  |
|          | May 3 to May 9, 2021   | 989  | 4-83  | 0.44-9.16  | 0-0  | 0.00-0.00  |
|          | May 10 to May 16, 2021 | 940  | 0-50  | 0.00-5.62  | 0-0  | 0.00-0.00  |
|          | May 17 to May 23, 2021 | 894  | 0-18  | 0.00-2.05  | 0-0  | 0.00-0.00  |
|          | May 24 to May 30, 2021 | 904  | 0-41  | 0.00-4.75  | 0-0  | 0.00-0.00  |
| Chiba    |                        |      |       |            |      |            |
|          | Apr 5 to Apr 11, 2021  | 905  | 0-56  | 0.00-6.60  | 0-0  | 0.00-0.00  |
|          | Apr 12 to Apr 18, 2021 | 852  | 0-17  | 0.00-2.04  | 0-0  | 0.00-0.00  |
|          | Apr 19 to Apr 25, 2021 | 787  | 0-0   | 0.00-0.00  | 0-36 | 0.00-4.37  |
|          | Apr 26 to May 2, 2021  | 874  | 0-67  | 0.00-8.30  | 0-0  | 0.00-0.00  |
|          | May 3 to May 9, 2021   | 833  | 0-37  | 0.00-4.65  | 0-0  | 0.00-0.00  |
|          | May 10 to May 16, 2021 | 780  | 0-0   | 0.00-0.00  | 0-4  | 0.00-0.51  |
|          | May 17 to May 23, 2021 | 742  | 0-0   | 0.00-0.00  | 0-30 | 0.00-3.89  |
|          | May 24 to May 30, 2021 | 766  | 0-0   | 0.00-0.00  | 0-3  | 0.00-0.39  |
| Tokyo    |                        |      |       |            |      |            |
|          | Apr 5 to Apr 11, 2021  | 1455 | 0-0   | 0.00-0.00  | 0-45 | 0.00-3.00  |
|          | Apr 12 to Apr 18, 2021 | 1536 | 0-62  | 0.00-4.21  | 0-0  | 0.00-0.00  |
|          | Apr 19 to Apr 25, 2021 | 1583 | 8-131 | 0.55-9.02  | 0-0  | 0.00-0.00  |
|          | Apr 26 to May 2, 2021  | 1520 | 0-87  | 0.00-6.07  | 0-0  | 0.00-0.00  |
|          | May 3 to May 9, 2021   | 1453 | 0-44  | 0.00-3.12  | 0-0  | 0.00-0.00  |
|          | May 10 to May 16, 2021 | 1388 | 0-0   | 0.00-0.00  | 0-7  | 0.00-0.50  |
|          | May 17 to May 23, 2021 | 1323 | 0-0   | 0.00-0.00  | 0-51 | 0.00-3.71  |
|          | May 24 to May 30, 2021 | 1402 | 0-42  | 0.00-3.09  | 0-0  | 0.00-0.00  |
| Kanagawa |                        |      |       |            |      |            |
|          | Apr 5 to Apr 11, 2021  | 998  | 0-0   | 0.00-0.00  | 0-34 | 0.00-3.29  |
|          | Apr 12 to Apr 18, 2021 | 1054 | 0-33  | 0.00-3.23  | 0-0  | 0.00-0.00  |
|          | Apr 19 to Apr 25, 2021 | 1031 | 0-27  | 0.00-2.69  | 0-0  | 0.00-0.00  |
|          | Apr 26 to May 2, 2021  | 1002 | 0-14  | 0.00-1.42  | 0-0  | 0.00-0.00  |
|          | May 3 to May 9, 2021   | 1002 | 0-37  | 0.00-3.83  | 0-0  | 0.00-0.00  |
|          | May 10 to May 16, 2021 | 944  | 0-0   | 0.00-0.00  | 0-17 | 0.00-1.77  |
|          | May 17 to May 23, 2021 | 994  | 0-53  | 0.00-5.63  | 0-0  | 0.00-0.00  |

|                        |                        |     |           |            |           |            |
|------------------------|------------------------|-----|-----------|------------|-----------|------------|
| Niigata                | May 24 to May 30, 2021 | 946 | 0-25      | 0.00-2.71  | 0-0       | 0.00-0.00  |
|                        | Apr 5 to Apr 11, 2021  | 390 | 0-0       | 0.00-0.00  | 0-32      | 0.00-7.58  |
|                        | Apr 12 to Apr 18, 2021 | 426 | 0-5       | 0.00-1.19  | 0-0       | 0.00-0.00  |
|                        | Apr 19 to Apr 25, 2021 | 415 | 0-0       | 0.00-0.00  | 0-2       | 0.00-0.48  |
|                        | Apr 26 to May 2, 2021  | 417 | 0-7       | 0.00-1.71  | 0-0       | 0.00-0.00  |
|                        | May 3 to May 9, 2021   | 391 | 0-0       | 0.00-0.00  | 0-14      | 0.00-3.46  |
|                        | May 10 to May 16, 2021 | 390 | 0-0       | 0.00-0.00  | 0-8       | 0.00-2.01  |
|                        | May 17 to May 23, 2021 | 379 | 0-0       | 0.00-0.00  | 0-16      | 0.00-4.05  |
| Toyama                 | May 24 to May 30, 2021 | 387 | 0-0       | 0.00-0.00  | 0-4       | 0.00-1.02  |
|                        | Apr 5 to Apr 11, 2021  | 194 | 0-18      | 0.00-10.23 | 0-0       | 0.00-0.00  |
|                        | Apr 12 to Apr 18, 2021 | 189 | 0-13      | 0.00-7.39  | 0-0       | 0.00-0.00  |
|                        | Apr 19 to Apr 25, 2021 | 185 | 0-13      | 0.00-7.56  | 0-0       | 0.00-0.00  |
|                        | Apr 26 to May 2, 2021  | 172 | 0-1       | 0.00-0.58  | 0-0       | 0.00-0.00  |
|                        | May 3 to May 9, 2021   | 184 | 0-15      | 0.00-8.88  | 0-0       | 0.00-0.00  |
|                        | May 10 to May 16, 2021 | 162 | 0-0       | 0.00-0.00  | 0-4       | 0.00-2.41  |
|                        | May 17 to May 23, 2021 | 142 | 0-0       | 0.00-0.00  | 0-23      | 0.00-13.94 |
| Ishikawa               | May 24 to May 30, 2021 | 169 | 0-6       | 0.00-3.68  | 0-0       | 0.00-0.00  |
|                        | Apr 5 to Apr 11, 2021  | 170 | 0-0       | 0.00-0.00  | 0-6       | 0.00-3.41  |
|                        | Apr 12 to Apr 18, 2021 | 186 | 0-11      | 0.00-6.29  | 0-0       | 0.00-0.00  |
|                        | Apr 19 to Apr 25, 2021 | 174 | 0-1       | 0.00-0.58  | 0-0       | 0.00-0.00  |
|                        | Apr 26 to May 2, 2021  | 177 | 0-8       | 0.00-4.73  | 0-0       | 0.00-0.00  |
|                        | May 3 to May 9, 2021   | 198 | 5-32      | 3.01-19.28 | 0-0       | 0.00-0.00  |
|                        | May 10 to May 16, 2021 | 189 | 0-26      | 0.00-15.95 | 0-0       | 0.00-0.00  |
|                        | May 17 to May 23, 2021 | 162 | 0-0       | 0.00-0.00  | 0-0       | 0.00-0.00  |
| Fukui                  | May 24 to May 30, 2021 | 147 | 0-0       | 0.00-0.00  | 0-12      | 0.00-7.55  |
|                        | Apr 5 to Apr 11, 2021  | 134 | 0-12      | 0.00-9.84  | 0-0       | 0.00-0.00  |
|                        | Apr 12 to Apr 18, 2021 | 128 | 0-6       | 0.00-4.92  | 0-0       | 0.00-0.00  |
|                        | Apr 19 to Apr 25, 2021 | 125 | 0-4       | 0.00-3.31  | 0-0       | 0.00-0.00  |
|                        | Apr 26 to May 2, 2021  | 137 | 0-19      | 0.00-16.10 | 0-0       | 0.00-0.00  |
|                        | May 3 to May 9, 2021   | 142 | 4-26      | 3.45-22.41 | 0-0       | 0.00-0.00  |
|                        | May 10 to May 16, 2021 | 115 | 0-0       | 0.00-0.00  | 0-1       | 0.00-0.86  |
|                        | May 17 to May 23, 2021 | 132 | 0-18      | 0.00-15.79 | 0-0       | 0.00-0.00  |
| Yamanashi              | May 24 to May 30, 2021 | 118 | 0-7       | 0.00-6.31  | 0-0       | 0.00-0.00  |
|                        | Apr 5 to Apr 11, 2021  | 116 | 0-0       | 0.00-0.00  | 0-18      | 0.00-13.43 |
|                        | Apr 12 to Apr 18, 2021 | 132 | 0-1       | 0.00-0.76  | 0-0       | 0.00-0.00  |
|                        | Apr 19 to Apr 25, 2021 | 143 | 0-15      | 0.00-11.72 | 0-0       | 0.00-0.00  |
|                        | Apr 26 to May 2, 2021  | 123 | 0-0       | 0.00-0.00  | 0-4       | 0.00-3.15  |
|                        | May 3 to May 9, 2021   | 138 | 0-13      | 0.00-10.40 | 0-0       | 0.00-0.00  |
|                        | May 10 to May 16, 2021 | 131 | 0-6       | 0.00-4.80  | 0-0       | 0.00-0.00  |
|                        | May 17 to May 23, 2021 | 134 | 0-10      | 0.00-8.06  | 0-0       | 0.00-0.00  |
| May 24 to May 30, 2021 | 115                    | 0-0 | 0.00-0.00 | 0-7        | 0.00-5.74 |            |

Nagano

|                        |     |      |           |      |            |
|------------------------|-----|------|-----------|------|------------|
| Apr 5 to Apr 11, 2021  | 314 | 0-0  | 0.00-0.00 | 0-19 | 0.00-5.71  |
| Apr 12 to Apr 18, 2021 | 324 | 0-0  | 0.00-0.00 | 0-8  | 0.00-2.41  |
| Apr 19 to Apr 25, 2021 | 311 | 0-0  | 0.00-0.00 | 0-15 | 0.00-4.60  |
| Apr 26 to May 2, 2021  | 343 | 0-24 | 0.00-7.52 | 0-0  | 0.00-0.00  |
| May 3 to May 9, 2021   | 306 | 0-0  | 0.00-0.00 | 0-5  | 0.00-1.61  |
| May 10 to May 16, 2021 | 326 | 0-18 | 0.00-5.84 | 0-0  | 0.00-0.00  |
| May 17 to May 23, 2021 | 296 | 0-0  | 0.00-0.00 | 0-8  | 0.00-2.63  |
| May 24 to May 30, 2021 | 264 | 0-0  | 0.00-0.00 | 0-35 | 0.00-11.71 |

Gifu

|                        |     |      |            |      |           |
|------------------------|-----|------|------------|------|-----------|
| Apr 5 to Apr 11, 2021  | 278 | 0-0  | 0.00-0.00  | 0-17 | 0.00-5.76 |
| Apr 12 to Apr 18, 2021 | 272 | 0-0  | 0.00-0.00  | 0-17 | 0.00-5.88 |
| Apr 19 to Apr 25, 2021 | 292 | 0-10 | 0.00-3.55  | 0-0  | 0.00-0.00 |
| Apr 26 to May 2, 2021  | 282 | 0-6  | 0.00-2.17  | 0-0  | 0.00-0.00 |
| May 3 to May 9, 2021   | 289 | 0-16 | 0.00-5.86  | 0-0  | 0.00-0.00 |
| May 10 to May 16, 2021 | 302 | 0-33 | 0.00-12.27 | 0-0  | 0.00-0.00 |
| May 17 to May 23, 2021 | 289 | 0-24 | 0.00-9.06  | 0-0  | 0.00-0.00 |
| May 24 to May 30, 2021 | 264 | 0-1  | 0.00-0.38  | 0-0  | 0.00-0.00 |

Shizuoka

|                        |     |      |           |     |           |
|------------------------|-----|------|-----------|-----|-----------|
| Apr 5 to Apr 11, 2021  | 539 | 0-18 | 0.00-3.45 | 0-0 | 0.00-0.00 |
| Apr 12 to Apr 18, 2021 | 507 | 0-0  | 0.00-0.00 | 0-8 | 0.00-1.55 |
| Apr 19 to Apr 25, 2021 | 513 | 0-9  | 0.00-1.79 | 0-0 | 0.00-0.00 |
| Apr 26 to May 2, 2021  | 526 | 0-29 | 0.00-5.84 | 0-0 | 0.00-0.00 |
| May 3 to May 9, 2021   | 508 | 0-20 | 0.00-4.10 | 0-0 | 0.00-0.00 |
| May 10 to May 16, 2021 | 481 | 0-4  | 0.00-0.84 | 0-0 | 0.00-0.00 |
| May 17 to May 23, 2021 | 494 | 0-24 | 0.00-5.11 | 0-0 | 0.00-0.00 |
| May 24 to May 30, 2021 | 470 | 0-8  | 0.00-1.73 | 0-0 | 0.00-0.00 |

Aichi

|                        |     |      |           |      |           |
|------------------------|-----|------|-----------|------|-----------|
| Apr 5 to Apr 11, 2021  | 861 | 0-0  | 0.00-0.00 | 8-85 | 0.85-8.99 |
| Apr 12 to Apr 18, 2021 | 942 | 0-11 | 0.00-1.18 | 0-0  | 0.00-0.00 |
| Apr 19 to Apr 25, 2021 | 945 | 0-23 | 0.00-2.49 | 0-0  | 0.00-0.00 |
| Apr 26 to May 2, 2021  | 947 | 0-34 | 0.00-3.72 | 0-0  | 0.00-0.00 |
| May 3 to May 9, 2021   | 904 | 0-10 | 0.00-1.12 | 0-0  | 0.00-0.00 |
| May 10 to May 16, 2021 | 932 | 0-58 | 0.00-6.64 | 0-0  | 0.00-0.00 |
| May 17 to May 23, 2021 | 790 | 0-0  | 0.00-0.00 | 0-71 | 0.00-8.25 |
| May 24 to May 30, 2021 | 841 | 0-0  | 0.00-0.00 | 0-5  | 0.00-0.59 |

Mie

|                        |     |      |            |     |           |
|------------------------|-----|------|------------|-----|-----------|
| Apr 5 to Apr 11, 2021  | 255 | 0-0  | 0.00-0.00  | 0-9 | 0.00-3.41 |
| Apr 12 to Apr 18, 2021 | 254 | 0-0  | 0.00-0.00  | 0-5 | 0.00-1.93 |
| Apr 19 to Apr 25, 2021 | 251 | 0-0  | 0.00-0.00  | 0-4 | 0.00-1.57 |
| Apr 26 to May 2, 2021  | 279 | 0-30 | 0.00-12.05 | 0-0 | 0.00-0.00 |
| May 3 to May 9, 2021   | 273 | 0-30 | 0.00-12.35 | 0-0 | 0.00-0.00 |
| May 10 to May 16, 2021 | 258 | 0-19 | 0.00-7.95  | 0-0 | 0.00-0.00 |
| May 17 to May 23, 2021 | 241 | 0-7  | 0.00-2.99  | 0-0 | 0.00-0.00 |
| May 24 to May 30, 2021 | 238 | 0-7  | 0.00-3.03  | 0-0 | 0.00-0.00 |

Shiga

|          |                        |      |      |            |      |            |
|----------|------------------------|------|------|------------|------|------------|
|          | Apr 5 to Apr 11, 2021  | 200  | 0-14 | 0.00-7.53  | 0-0  | 0.00-0.00  |
|          | Apr 12 to Apr 18, 2021 | 193  | 0-9  | 0.00-4.89  | 0-0  | 0.00-0.00  |
|          | Apr 19 to Apr 25, 2021 | 164  | 0-0  | 0.00-0.00  | 0-15 | 0.00-8.38  |
|          | Apr 26 to May 2, 2021  | 192  | 0-16 | 0.00-9.09  | 0-0  | 0.00-0.00  |
|          | May 3 to May 9, 2021   | 194  | 0-21 | 0.00-12.14 | 0-0  | 0.00-0.00  |
|          | May 10 to May 16, 2021 | 163  | 0-0  | 0.00-0.00  | 0-6  | 0.00-3.55  |
|          | May 17 to May 23, 2021 | 182  | 0-15 | 0.00-8.98  | 0-0  | 0.00-0.00  |
|          | May 24 to May 30, 2021 | 174  | 0-9  | 0.00-5.45  | 0-0  | 0.00-0.00  |
| Kyoto    |                        |      |      |            |      |            |
|          | Apr 5 to Apr 11, 2021  | 356  | 0-0  | 0.00-0.00  | 0-22 | 0.00-5.82  |
|          | Apr 12 to Apr 18, 2021 | 377  | 0-5  | 0.00-1.34  | 0-0  | 0.00-0.00  |
|          | Apr 19 to Apr 25, 2021 | 363  | 0-0  | 0.00-0.00  | 0-4  | 0.00-1.09  |
|          | Apr 26 to May 2, 2021  | 385  | 0-22 | 0.00-6.06  | 0-0  | 0.00-0.00  |
|          | May 3 to May 9, 2021   | 375  | 0-18 | 0.00-5.04  | 0-0  | 0.00-0.00  |
|          | May 10 to May 16, 2021 | 349  | 0-2  | 0.00-0.58  | 0-0  | 0.00-0.00  |
|          | May 17 to May 23, 2021 | 305  | 0-0  | 0.00-0.00  | 0-38 | 0.00-11.08 |
|          | May 24 to May 30, 2021 | 331  | 0-0  | 0.00-0.00  | 0-7  | 0.00-2.07  |
| Osaka    |                        |      |      |            |      |            |
|          | Apr 5 to Apr 11, 2021  | 1226 | 0-0  | 0.00-0.00  | 0-17 | 0.00-1.37  |
|          | Apr 12 to Apr 18, 2021 | 1187 | 0-0  | 0.00-0.00  | 0-54 | 0.00-4.35  |
|          | Apr 19 to Apr 25, 2021 | 1329 | 2-99 | 0.16-8.05  | 0-0  | 0.00-0.00  |
|          | Apr 26 to May 2, 2021  | 1189 | 0-0  | 0.00-0.00  | 0-18 | 0.00-1.49  |
|          | May 3 to May 9, 2021   | 1259 | 0-76 | 0.00-6.42  | 0-0  | 0.00-0.00  |
|          | May 10 to May 16, 2021 | 1199 | 0-33 | 0.00-2.83  | 0-0  | 0.00-0.00  |
|          | May 17 to May 23, 2021 | 1147 | 0-0  | 0.00-0.00  | 0-7  | 0.00-0.61  |
|          | May 24 to May 30, 2021 | 1165 | 0-22 | 0.00-1.92  | 0-0  | 0.00-0.00  |
| Hyogo    |                        |      |      |            |      |            |
|          | Apr 5 to Apr 11, 2021  | 742  | 0-0  | 0.00-0.00  | 0-22 | 0.00-2.88  |
|          | Apr 12 to Apr 18, 2021 | 735  | 0-0  | 0.00-0.00  | 0-13 | 0.00-1.74  |
|          | Apr 19 to Apr 25, 2021 | 743  | 0-9  | 0.00-1.23  | 0-0  | 0.00-0.00  |
|          | Apr 26 to May 2, 2021  | 753  | 0-33 | 0.00-4.58  | 0-0  | 0.00-0.00  |
|          | May 3 to May 9, 2021   | 734  | 0-24 | 0.00-3.38  | 0-0  | 0.00-0.00  |
|          | May 10 to May 16, 2021 | 713  | 0-9  | 0.00-1.28  | 0-0  | 0.00-0.00  |
|          | May 17 to May 23, 2021 | 731  | 0-35 | 0.00-5.03  | 0-0  | 0.00-0.00  |
|          | May 24 to May 30, 2021 | 685  | 0-0  | 0.00-0.00  | 0-1  | 0.00-0.15  |
| Nara     |                        |      |      |            |      |            |
|          | Apr 5 to Apr 11, 2021  | 178  | 0-0  | 0.00-0.00  | 0-17 | 0.00-8.72  |
|          | Apr 12 to Apr 18, 2021 | 193  | 0-0  | 0.00-0.00  | 0-0  | 0.00-0.00  |
|          | Apr 19 to Apr 25, 2021 | 223  | 3-33 | 1.58-17.37 | 0-0  | 0.00-0.00  |
|          | Apr 26 to May 2, 2021  | 170  | 0-0  | 0.00-0.00  | 0-17 | 0.00-9.09  |
|          | May 3 to May 9, 2021   | 182  | 0-0  | 0.00-0.00  | 0-3  | 0.00-1.62  |
|          | May 10 to May 16, 2021 | 194  | 0-12 | 0.00-6.59  | 0-0  | 0.00-0.00  |
|          | May 17 to May 23, 2021 | 170  | 0-0  | 0.00-0.00  | 0-8  | 0.00-4.49  |
|          | May 24 to May 30, 2021 | 181  | 0-5  | 0.00-2.84  | 0-0  | 0.00-0.00  |
| Wakayama |                        |      |      |            |      |            |
|          | Apr 5 to Apr 11, 2021  | 168  | 0-0  | 0.00-0.00  | 0-2  | 0.00-1.18  |

|           |                        |     |       |            |      |            |
|-----------|------------------------|-----|-------|------------|------|------------|
|           | Apr 12 to Apr 18, 2021 | 170 | 0-2   | 0.00-1.19  | 0-0  | 0.00-0.00  |
|           | Apr 19 to Apr 25, 2021 | 174 | 0-7   | 0.00-4.19  | 0-0  | 0.00-0.00  |
|           | Apr 26 to May 2, 2021  | 156 | 0-0   | 0.00-0.00  | 0-7  | 0.00-4.29  |
|           | May 3 to May 9, 2021   | 159 | 0-0   | 0.00-0.00  | 0-1  | 0.00-0.63  |
|           | May 10 to May 16, 2021 | 146 | 0-0   | 0.00-0.00  | 0-10 | 0.00-6.41  |
|           | May 17 to May 23, 2021 | 133 | 0-0   | 0.00-0.00  | 0-16 | 0.00-10.74 |
|           | May 24 to May 30, 2021 | 148 | 0-1   | 0.00-0.68  | 0-0  | 0.00-0.00  |
| Tottori   |                        |     |       |            |      |            |
|           | Apr 5 to Apr 11, 2021  | 85  | 0-0   | 0.00-0.00  | 0-10 | 0.00-10.53 |
|           | Apr 12 to Apr 18, 2021 | 91  | 0-0   | 0.00-0.00  | 0-3  | 0.00-3.19  |
|           | Apr 19 to Apr 25, 2021 | 88  | 0-0   | 0.00-0.00  | 0-3  | 0.00-3.30  |
|           | Apr 26 to May 2, 2021  | 87  | 0-0   | 0.00-0.00  | 0-2  | 0.00-2.25  |
|           | May 3 to May 9, 2021   | 101 | 0-13  | 0.00-14.77 | 0-0  | 0.00-0.00  |
|           | May 10 to May 16, 2021 | 98  | 0-11  | 0.00-12.64 | 0-0  | 0.00-0.00  |
|           | May 17 to May 23, 2021 | 87  | 0-2   | 0.00-2.35  | 0-0  | 0.00-0.00  |
|           | May 24 to May 30, 2021 | 84  | 0-0   | 0.00-0.00  | 0-1  | 0.00-1.18  |
| Shimane   |                        |     |       |            |      |            |
|           | Apr 5 to Apr 11, 2021  | 105 | 0-0   | 0.00-0.00  | 2-25 | 1.54-19.23 |
|           | Apr 12 to Apr 18, 2021 | 148 | 0-20  | 0.00-15.63 | 0-0  | 0.00-0.00  |
|           | Apr 19 to Apr 25, 2021 | 133 | 0-7   | 0.00-5.56  | 0-0  | 0.00-0.00  |
|           | Apr 26 to May 2, 2021  | 130 | 0-6   | 0.00-4.84  | 0-0  | 0.00-0.00  |
|           | May 3 to May 9, 2021   | 137 | 0-15  | 0.00-12.30 | 0-0  | 0.00-0.00  |
|           | May 10 to May 16, 2021 | 128 | 0-11  | 0.00-9.40  | 0-0  | 0.00-0.00  |
|           | May 17 to May 23, 2021 | 121 | 0-6   | 0.00-5.22  | 0-0  | 0.00-0.00  |
|           | May 24 to May 30, 2021 | 120 | 0-7   | 0.00-6.19  | 0-0  | 0.00-0.00  |
| Okayama   |                        |     |       |            |      |            |
|           | Apr 5 to Apr 11, 2021  | 304 | 0-0   | 0.00-0.00  | 0-0  | 0.00-0.00  |
|           | Apr 12 to Apr 18, 2021 | 310 | 0-11  | 0.00-3.68  | 0-0  | 0.00-0.00  |
|           | Apr 19 to Apr 25, 2021 | 320 | 0-26  | 0.00-8.84  | 0-0  | 0.00-0.00  |
|           | Apr 26 to May 2, 2021  | 287 | 0-0   | 0.00-0.00  | 0-6  | 0.00-2.05  |
|           | May 3 to May 9, 2021   | 287 | 0-0   | 0.00-0.00  | 0-5  | 0.00-1.71  |
|           | May 10 to May 16, 2021 | 304 | 0-15  | 0.00-5.19  | 0-0  | 0.00-0.00  |
|           | May 17 to May 23, 2021 | 261 | 0-0   | 0.00-0.00  | 0-22 | 0.00-7.77  |
|           | May 24 to May 30, 2021 | 278 | 0-0   | 0.00-0.00  | 0-0  | 0.00-0.00  |
| Hiroshima |                        |     |       |            |      |            |
|           | Apr 5 to Apr 11, 2021  | 433 | 0-9   | 0.00-2.12  | 0-0  | 0.00-0.00  |
|           | Apr 12 to Apr 18, 2021 | 416 | 0-0   | 0.00-0.00  | 0-2  | 0.00-0.48  |
|           | Apr 19 to Apr 25, 2021 | 441 | 0-30  | 0.00-7.30  | 0-0  | 0.00-0.00  |
|           | Apr 26 to May 2, 2021  | 431 | 0-25  | 0.00-6.16  | 0-0  | 0.00-0.00  |
|           | May 3 to May 9, 2021   | 426 | 0-27  | 0.00-6.77  | 0-0  | 0.00-0.00  |
|           | May 10 to May 16, 2021 | 450 | 11-55 | 2.78-13.92 | 0-0  | 0.00-0.00  |
|           | May 17 to May 23, 2021 | 400 | 0-14  | 0.00-3.63  | 0-0  | 0.00-0.00  |
|           | May 24 to May 30, 2021 | 389 | 0-10  | 0.00-2.64  | 0-0  | 0.00-0.00  |
| Yamaguchi |                        |     |       |            |      |            |
|           | Apr 5 to Apr 11, 2021  | 256 | 0-0   | 0.00-0.00  | 0-11 | 0.00-4.12  |
|           | Apr 12 to Apr 18, 2021 | 281 | 0-18  | 0.00-6.84  | 0-0  | 0.00-0.00  |

|           |                        |     |        |             |      |            |
|-----------|------------------------|-----|--------|-------------|------|------------|
|           | Apr 19 to Apr 25, 2021 | 286 | 0-25   | 0.00-9.58   | 0-0  | 0.00-0.00  |
|           | Apr 26 to May 2, 2021  | 283 | 0-24   | 0.00-9.27   | 0-0  | 0.00-0.00  |
|           | May 3 to May 9, 2021   | 281 | 0-26   | 0.00-10.20  | 0-0  | 0.00-0.00  |
|           | May 10 to May 16, 2021 | 243 | 0-0    | 0.00-0.00   | 0-9  | 0.00-3.57  |
|           | May 17 to May 23, 2021 | 252 | 0-3    | 0.00-1.20   | 0-0  | 0.00-0.00  |
|           | May 24 to May 30, 2021 | 274 | 0-31   | 0.00-12.76  | 0-0  | 0.00-0.00  |
| Tokushima |                        |     |        |             |      |            |
|           | Apr 5 to Apr 11, 2021  | 149 | 0-8    | 0.00-5.67   | 0-0  | 0.00-0.00  |
|           | Apr 12 to Apr 18, 2021 | 124 | 0-0    | 0.00-0.00   | 0-16 | 0.00-11.43 |
|           | Apr 19 to Apr 25, 2021 | 176 | 15-39  | 10.95-28.47 | 0-0  | 0.00-0.00  |
|           | Apr 26 to May 2, 2021  | 127 | 0-0    | 0.00-0.00   | 0-7  | 0.00-5.22  |
|           | May 3 to May 9, 2021   | 147 | 0-14   | 0.00-10.53  | 0-0  | 0.00-0.00  |
|           | May 10 to May 16, 2021 | 152 | 0-20   | 0.00-15.15  | 0-0  | 0.00-0.00  |
|           | May 17 to May 23, 2021 | 117 | 0-0    | 0.00-0.00   | 0-10 | 0.00-7.87  |
|           | May 24 to May 30, 2021 | 133 | 0-8    | 0.00-6.40   | 0-0  | 0.00-0.00  |
| Kagawa    |                        |     |        |             |      |            |
|           | Apr 5 to Apr 11, 2021  | 154 | 0-0    | 0.00-0.00   | 0-5  | 0.00-3.14  |
|           | Apr 12 to Apr 18, 2021 | 163 | 0-5    | 0.00-3.16   | 0-0  | 0.00-0.00  |
|           | Apr 19 to Apr 25, 2021 | 136 | 0-0    | 0.00-0.00   | 0-19 | 0.00-12.26 |
|           | Apr 26 to May 2, 2021  | 151 | 0-0    | 0.00-0.00   | 0-1  | 0.00-0.66  |
|           | May 3 to May 9, 2021   | 144 | 0-0    | 0.00-0.00   | 0-6  | 0.00-4.00  |
|           | May 10 to May 16, 2021 | 147 | 0-4    | 0.00-2.80   | 0-0  | 0.00-0.00  |
|           | May 17 to May 23, 2021 | 137 | 0-0    | 0.00-0.00   | 0-4  | 0.00-2.84  |
|           | May 24 to May 30, 2021 | 145 | 0-9    | 0.00-6.62   | 0-0  | 0.00-0.00  |
| Ehime     |                        |     |        |             |      |            |
|           | Apr 5 to Apr 11, 2021  | 231 | 0-0    | 0.00-0.00   | 0-9  | 0.00-3.75  |
|           | Apr 12 to Apr 18, 2021 | 246 | 0-9    | 0.00-3.80   | 0-0  | 0.00-0.00  |
|           | Apr 19 to Apr 25, 2021 | 239 | 0-5    | 0.00-2.14   | 0-0  | 0.00-0.00  |
|           | Apr 26 to May 2, 2021  | 253 | 0-23   | 0.00-10.00  | 0-0  | 0.00-0.00  |
|           | May 3 to May 9, 2021   | 226 | 0-0    | 0.00-0.00   | 0-2  | 0.00-0.88  |
|           | May 10 to May 16, 2021 | 261 | 7-39   | 3.15-17.57  | 0-0  | 0.00-0.00  |
|           | May 17 to May 23, 2021 | 223 | 0-4    | 0.00-1.83   | 0-0  | 0.00-0.00  |
|           | May 24 to May 30, 2021 | 242 | 0-27   | 0.00-12.56  | 0-0  | 0.00-0.00  |
| Kochi     |                        |     |        |             |      |            |
|           | Apr 5 to Apr 11, 2021  | 145 | 0-0    | 0.00-0.00   | 0-5  | 0.00-3.33  |
|           | Apr 12 to Apr 18, 2021 | 147 | 0-0    | 0.00-0.00   | 0-4  | 0.00-2.65  |
|           | Apr 19 to Apr 25, 2021 | 160 | 0-12   | 0.00-8.11   | 0-0  | 0.00-0.00  |
|           | Apr 26 to May 2, 2021  | 146 | 0-0    | 0.00-0.00   | 0-1  | 0.00-0.68  |
|           | May 3 to May 9, 2021   | 134 | 0-0    | 0.00-0.00   | 0-9  | 0.00-6.29  |
|           | May 10 to May 16, 2021 | 156 | 0-15   | 0.00-10.64  | 0-0  | 0.00-0.00  |
|           | May 17 to May 23, 2021 | 152 | 0-14   | 0.00-10.14  | 0-0  | 0.00-0.00  |
|           | May 24 to May 30, 2021 | 155 | 0-19   | 0.00-13.97  | 0-0  | 0.00-0.00  |
| Fukuoka   |                        |     |        |             |      |            |
|           | Apr 5 to Apr 11, 2021  | 733 | 0-0    | 0.00-0.00   | 4-76 | 0.49-9.39  |
|           | Apr 12 to Apr 18, 2021 | 804 | 0-2    | 0.00-0.25   | 0-0  | 0.00-0.00  |
|           | Apr 19 to Apr 25, 2021 | 907 | 44-118 | 5.58-14.96  | 0-0  | 0.00-0.00  |

|          |                        |     |      |            |      |            |
|----------|------------------------|-----|------|------------|------|------------|
|          | Apr 26 to May 2, 2021  | 792 | 0-16 | 0.00-2.06  | 0-0  | 0.00-0.00  |
|          | May 3 to May 9, 2021   | 805 | 0-44 | 0.00-5.78  | 0-0  | 0.00-0.00  |
|          | May 10 to May 16, 2021 | 812 | 0-60 | 0.00-7.98  | 0-0  | 0.00-0.00  |
|          | May 17 to May 23, 2021 | 743 | 0-0  | 0.00-0.00  | 0-2  | 0.00-0.27  |
|          | May 24 to May 30, 2021 | 751 | 0-19 | 0.00-2.60  | 0-0  | 0.00-0.00  |
| Saga     |                        |     |      |            |      |            |
|          | Apr 5 to Apr 11, 2021  | 146 | 0-4  | 0.00-2.82  | 0-0  | 0.00-0.00  |
|          | Apr 12 to Apr 18, 2021 | 139 | 0-0  | 0.00-0.00  | 0-0  | 0.00-0.00  |
|          | Apr 19 to Apr 25, 2021 | 151 | 0-12 | 0.00-8.63  | 0-0  | 0.00-0.00  |
|          | Apr 26 to May 2, 2021  | 133 | 0-0  | 0.00-0.00  | 0-4  | 0.00-2.92  |
|          | May 3 to May 9, 2021   | 144 | 0-9  | 0.00-6.67  | 0-0  | 0.00-0.00  |
|          | May 10 to May 16, 2021 | 154 | 0-21 | 0.00-15.79 | 0-0  | 0.00-0.00  |
|          | May 17 to May 23, 2021 | 132 | 0-0  | 0.00-0.00  | 0-2  | 0.00-1.49  |
|          | May 24 to May 30, 2021 | 133 | 0-0  | 0.00-0.00  | 0-0  | 0.00-0.00  |
| Nagasaki |                        |     |      |            |      |            |
|          | Apr 5 to Apr 11, 2021  | 251 | 0-0  | 0.00-0.00  | 0-13 | 0.00-4.92  |
|          | Apr 12 to Apr 18, 2021 | 247 | 0-0  | 0.00-0.00  | 0-13 | 0.00-5.00  |
|          | Apr 19 to Apr 25, 2021 | 253 | 0-0  | 0.00-0.00  | 0-2  | 0.00-0.78  |
|          | Apr 26 to May 2, 2021  | 248 | 0-0  | 0.00-0.00  | 0-1  | 0.00-0.40  |
|          | May 3 to May 9, 2021   | 266 | 0-19 | 0.00-7.69  | 0-0  | 0.00-0.00  |
|          | May 10 to May 16, 2021 | 252 | 0-9  | 0.00-3.70  | 0-0  | 0.00-0.00  |
|          | May 17 to May 23, 2021 | 233 | 0-0  | 0.00-0.00  | 0-7  | 0.00-2.92  |
|          | May 24 to May 30, 2021 | 275 | 8-40 | 3.40-17.02 | 0-0  | 0.00-0.00  |
| Kumamoto |                        |     |      |            |      |            |
|          | Apr 5 to Apr 11, 2021  | 308 | 0-0  | 0.00-0.00  | 0-1  | 0.00-0.32  |
|          | Apr 12 to Apr 18, 2021 | 327 | 0-21 | 0.00-6.86  | 0-0  | 0.00-0.00  |
|          | Apr 19 to Apr 25, 2021 | 333 | 0-30 | 0.00-9.90  | 0-0  | 0.00-0.00  |
|          | Apr 26 to May 2, 2021  | 295 | 0-0  | 0.00-0.00  | 0-5  | 0.00-1.67  |
|          | May 3 to May 9, 2021   | 296 | 0-2  | 0.00-0.68  | 0-0  | 0.00-0.00  |
|          | May 10 to May 16, 2021 | 300 | 0-12 | 0.00-4.17  | 0-0  | 0.00-0.00  |
|          | May 17 to May 23, 2021 | 303 | 0-17 | 0.00-5.94  | 0-0  | 0.00-0.00  |
|          | May 24 to May 30, 2021 | 281 | 0-0  | 0.00-0.00  | 0-2  | 0.00-0.71  |
| Oita     |                        |     |      |            |      |            |
|          | Apr 5 to Apr 11, 2021  | 180 | 0-0  | 0.00-0.00  | 0-18 | 0.00-9.09  |
|          | Apr 12 to Apr 18, 2021 | 209 | 0-14 | 0.00-7.18  | 0-0  | 0.00-0.00  |
|          | Apr 19 to Apr 25, 2021 | 224 | 3-31 | 1.55-16.06 | 0-0  | 0.00-0.00  |
|          | Apr 26 to May 2, 2021  | 180 | 0-0  | 0.00-0.00  | 0-12 | 0.00-6.25  |
|          | May 3 to May 9, 2021   | 168 | 0-0  | 0.00-0.00  | 0-19 | 0.00-10.16 |
|          | May 10 to May 16, 2021 | 223 | 9-37 | 4.84-19.89 | 0-0  | 0.00-0.00  |
|          | May 17 to May 23, 2021 | 181 | 0-0  | 0.00-0.00  | 0-4  | 0.00-2.16  |
|          | May 24 to May 30, 2021 | 186 | 0-7  | 0.00-3.91  | 0-0  | 0.00-0.00  |
| Miyazaki |                        |     |      |            |      |            |
|          | Apr 5 to Apr 11, 2021  | 213 | 0-18 | 0.00-9.23  | 0-0  | 0.00-0.00  |
|          | Apr 12 to Apr 18, 2021 | 188 | 0-0  | 0.00-0.00  | 0-6  | 0.00-3.09  |
|          | Apr 19 to Apr 25, 2021 | 224 | 5-32 | 2.60-16.67 | 0-0  | 0.00-0.00  |
|          | Apr 26 to May 2, 2021  | 203 | 0-12 | 0.00-6.28  | 0-0  | 0.00-0.00  |

|           |                        |     |      |           |      |           |
|-----------|------------------------|-----|------|-----------|------|-----------|
|           | May 3 to May 9, 2021   | 202 | 0-12 | 0.00-6.32 | 0-0  | 0.00-0.00 |
|           | May 10 to May 16, 2021 | 188 | 0-0  | 0.00-0.00 | 0-0  | 0.00-0.00 |
|           | May 17 to May 23, 2021 | 187 | 0-1  | 0.00-0.54 | 0-0  | 0.00-0.00 |
|           | May 24 to May 30, 2021 | 181 | 0-0  | 0.00-0.00 | 0-1  | 0.00-0.55 |
| Kagoshima |                        |     |      |           |      |           |
|           | Apr 5 to Apr 11, 2021  | 327 | 0-24 | 0.00-7.92 | 0-0  | 0.00-0.00 |
|           | Apr 12 to Apr 18, 2021 | 273 | 0-0  | 0.00-0.00 | 0-26 | 0.00-8.70 |
|           | Apr 19 to Apr 25, 2021 | 298 | 0-5  | 0.00-1.71 | 0-0  | 0.00-0.00 |
|           | Apr 26 to May 2, 2021  | 277 | 0-0  | 0.00-0.00 | 0-13 | 0.00-4.48 |
|           | May 3 to May 9, 2021   | 313 | 0-26 | 0.00-9.06 | 0-0  | 0.00-0.00 |
|           | May 10 to May 16, 2021 | 266 | 0-0  | 0.00-0.00 | 0-16 | 0.00-5.67 |
|           | May 17 to May 23, 2021 | 287 | 0-7  | 0.00-2.50 | 0-0  | 0.00-0.00 |
|           | May 24 to May 30, 2021 | 290 | 0-15 | 0.00-5.45 | 0-0  | 0.00-0.00 |
| Okinawa   |                        |     |      |           |      |           |
|           | Apr 5 to Apr 11, 2021  | 168 | 0-0  | 0.00-0.00 | 0-5  | 0.00-2.89 |
|           | Apr 12 to Apr 18, 2021 | 180 | 0-7  | 0.00-4.05 | 0-0  | 0.00-0.00 |
|           | Apr 19 to Apr 25, 2021 | 179 | 0-10 | 0.00-5.92 | 0-0  | 0.00-0.00 |
|           | Apr 26 to May 2, 2021  | 158 | 0-0  | 0.00-0.00 | 0-12 | 0.00-7.06 |
|           | May 3 to May 9, 2021   | 154 | 0-0  | 0.00-0.00 | 0-14 | 0.00-8.33 |
|           | May 10 to May 16, 2021 | 162 | 0-0  | 0.00-0.00 | 0-6  | 0.00-3.57 |
|           | May 17 to May 23, 2021 | 151 | 0-0  | 0.00-0.00 | 0-16 | 0.00-9.58 |
|           | May 24 to May 30, 2021 | 159 | 0-0  | 0.00-0.00 | 0-6  | 0.00-3.64 |

---



**Table A.3: Weekly number of observed and excess/exiguous deaths in Japan and 47 prefectures for non-COVID-19-related deaths in nursing homes and elderly care facilities from January 2020 through May 2021.**

| Prefecture | Week                   | Observed | Excess deaths | Percent excess | Exiguous deaths | Percent exiguous |
|------------|------------------------|----------|---------------|----------------|-----------------|------------------|
| Japan      |                        |          |               |                |                 |                  |
|            | Apr 5 to Apr 11, 2021  | 3565     | 0–47          | 0.00–1.34      | 0–0             | 0.00–0.00        |
|            | Apr 12 to Apr 18, 2021 | 3840     | 148–361       | 4.25–10.38     | 0–0             | 0.00–0.00        |
|            | Apr 19 to Apr 25, 2021 | 3725     | 48–274        | 1.39–7.94      | 0–0             | 0.00–0.00        |
|            | Apr 26 to May 2, 2021  | 3863     | 217–439       | 6.34–12.82     | 0–0             | 0.00–0.00        |
|            | May 3 to May 9, 2021   | 3856     | 278–485       | 8.25–14.39     | 0–0             | 0.00–0.00        |
|            | May 10 to May 16, 2021 | 3753     | 202–405       | 6.03–12.10     | 0–0             | 0.00–0.00        |
|            | May 17 to May 23, 2021 | 3641     | 133–328       | 4.01–9.90      | 0–0             | 0.00–0.00        |
|            | May 24 to May 30, 2021 | 3494     | 0–190         | 0.00–5.75      | 0–0             | 0.00–0.00        |
| Hokkaido   |                        |          |               |                |                 |                  |
|            | Apr 5 to Apr 11, 2021  | 91       | 0–6           | 0.00–7.06      | 0–0             | 0.00–0.00        |
|            | Apr 12 to Apr 18, 2021 | 105      | 1–20          | 1.18–23.53     | 0–0             | 0.00–0.00        |
|            | Apr 19 to Apr 25, 2021 | 89       | 0–2           | 0.00–2.30      | 0–0             | 0.00–0.00        |
|            | Apr 26 to May 2, 2021  | 89       | 0–3           | 0.00–3.49      | 0–0             | 0.00–0.00        |
|            | May 3 to May 9, 2021   | 108      | 2–21          | 2.30–24.14     | 0–0             | 0.00–0.00        |
|            | May 10 to May 16, 2021 | 79       | 0–0           | 0.00–0.00      | 0–7             | 0.00–8.14        |
|            | May 17 to May 23, 2021 | 80       | 0–0           | 0.00–0.00      | 0–5             | 0.00–5.88        |
|            | May 24 to May 30, 2021 | 94       | 0–11          | 0.00–13.25     | 0–0             | 0.00–0.00        |
| Aomori     |                        |          |               |                |                 |                  |
|            | Apr 5 to Apr 11, 2021  | 64       | 0–9           | 0.00–16.36     | 0–0             | 0.00–0.00        |
|            | Apr 12 to Apr 18, 2021 | 58       | 0–3           | 0.00–5.45      | 0–0             | 0.00–0.00        |
|            | Apr 19 to Apr 25, 2021 | 52       | 0–0           | 0.00–0.00      | 0–2             | 0.00–3.70        |
|            | Apr 26 to May 2, 2021  | 55       | 0–2           | 0.00–3.77      | 0–0             | 0.00–0.00        |
|            | May 3 to May 9, 2021   | 59       | 0–7           | 0.00–13.46     | 0–0             | 0.00–0.00        |
|            | May 10 to May 16, 2021 | 58       | 0–7           | 0.00–13.73     | 0–0             | 0.00–0.00        |
|            | May 17 to May 23, 2021 | 63       | 0–12          | 0.00–23.53     | 0–0             | 0.00–0.00        |
|            | May 24 to May 30, 2021 | 57       | 0–6           | 0.00–11.76     | 0–0             | 0.00–0.00        |
| Iwate      |                        |          |               |                |                 |                  |
|            | Apr 5 to Apr 11, 2021  | 48       | 0–1           | 0.00–2.13      | 0–0             | 0.00–0.00        |
|            | Apr 12 to Apr 18, 2021 | 59       | 0–12          | 0.00–25.53     | 0–0             | 0.00–0.00        |
|            | Apr 19 to Apr 25, 2021 | 39       | 0–0           | 0.00–0.00      | 0–8             | 0.00–17.02       |
|            | Apr 26 to May 2, 2021  | 50       | 0–4           | 0.00–8.70      | 0–0             | 0.00–0.00        |
|            | May 3 to May 9, 2021   | 53       | 0–7           | 0.00–15.22     | 0–0             | 0.00–0.00        |
|            | May 10 to May 16, 2021 | 42       | 0–0           | 0.00–0.00      | 0–2             | 0.00–4.55        |
|            | May 17 to May 23, 2021 | 45       | 0–1           | 0.00–2.27      | 0–0             | 0.00–0.00        |
|            | May 24 to May 30, 2021 | 42       | 0–0           | 0.00–0.00      | 0–3             | 0.00–6.67        |
| Miyagi     |                        |          |               |                |                 |                  |
|            | Apr 5 to Apr 11, 2021  | 69       | 0–7           | 0.00–11.29     | 0–0             | 0.00–0.00        |
|            | Apr 12 to Apr 18, 2021 | 85       | 7–23          | 11.29–37.10    | 0–0             | 0.00–0.00        |
|            | Apr 19 to Apr 25, 2021 | 63       | 0–1           | 0.00–1.61      | 0–0             | 0.00–0.00        |
|            | Apr 26 to May 2, 2021  | 67       | 0–4           | 0.00–6.35      | 0–0             | 0.00–0.00        |
|            | May 3 to May 9, 2021   | 65       | 0–2           | 0.00–3.17      | 0–0             | 0.00–0.00        |

|           |                        |    |      |             |      |            |
|-----------|------------------------|----|------|-------------|------|------------|
|           | May 10 to May 16, 2021 | 73 | 0-11 | 0.00-17.74  | 0-0  | 0.00-0.00  |
|           | May 17 to May 23, 2021 | 58 | 0-0  | 0.00-0.00   | 0-5  | 0.00-7.94  |
|           | May 24 to May 30, 2021 | 58 | 0-0  | 0.00-0.00   | 0-6  | 0.00-9.38  |
| Akita     |                        |    |      |             |      |            |
|           | Apr 5 to Apr 11, 2021  | 40 | 0-1  | 0.00-2.56   | 0-0  | 0.00-0.00  |
|           | Apr 12 to Apr 18, 2021 | 55 | 4-16 | 10.26-41.03 | 0-0  | 0.00-0.00  |
|           | Apr 19 to Apr 25, 2021 | 29 | 0-0  | 0.00-0.00   | 0-10 | 0.00-25.64 |
|           | Apr 26 to May 2, 2021  | 41 | 0-3  | 0.00-7.89   | 0-0  | 0.00-0.00  |
|           | May 3 to May 9, 2021   | 54 | 5-17 | 13.51-45.95 | 0-0  | 0.00-0.00  |
|           | May 10 to May 16, 2021 | 36 | 0-0  | 0.00-0.00   | 0-0  | 0.00-0.00  |
|           | May 17 to May 23, 2021 | 38 | 0-2  | 0.00-5.56   | 0-0  | 0.00-0.00  |
|           | May 24 to May 30, 2021 | 40 | 0-4  | 0.00-11.11  | 0-0  | 0.00-0.00  |
| Yamagata  |                        |    |      |             |      |            |
|           | Apr 5 to Apr 11, 2021  | 41 | 0-0  | 0.00-0.00   | 2-16 | 3.51-28.07 |
|           | Apr 12 to Apr 18, 2021 | 63 | 0-8  | 0.00-14.55  | 0-0  | 0.00-0.00  |
|           | Apr 19 to Apr 25, 2021 | 53 | 0-0  | 0.00-0.00   | 0-0  | 0.00-0.00  |
|           | Apr 26 to May 2, 2021  | 60 | 0-7  | 0.00-13.21  | 0-0  | 0.00-0.00  |
|           | May 3 to May 9, 2021   | 67 | 1-15 | 1.92-28.85  | 0-0  | 0.00-0.00  |
|           | May 10 to May 16, 2021 | 55 | 0-4  | 0.00-7.84   | 0-0  | 0.00-0.00  |
|           | May 17 to May 23, 2021 | 69 | 3-17 | 5.77-32.69  | 0-0  | 0.00-0.00  |
|           | May 24 to May 30, 2021 | 62 | 0-11 | 0.00-21.57  | 0-0  | 0.00-0.00  |
| Fukushima |                        |    |      |             |      |            |
|           | Apr 5 to Apr 11, 2021  | 61 | 0-3  | 0.00-5.17   | 0-0  | 0.00-0.00  |
|           | Apr 12 to Apr 18, 2021 | 59 | 0-1  | 0.00-1.72   | 0-0  | 0.00-0.00  |
|           | Apr 19 to Apr 25, 2021 | 58 | 0-0  | 0.00-0.00   | 0-0  | 0.00-0.00  |
|           | Apr 26 to May 2, 2021  | 65 | 0-6  | 0.00-10.17  | 0-0  | 0.00-0.00  |
|           | May 3 to May 9, 2021   | 67 | 0-9  | 0.00-15.52  | 0-0  | 0.00-0.00  |
|           | May 10 to May 16, 2021 | 62 | 0-5  | 0.00-8.77   | 0-0  | 0.00-0.00  |
|           | May 17 to May 23, 2021 | 55 | 0-0  | 0.00-0.00   | 0-2  | 0.00-3.51  |
|           | May 24 to May 30, 2021 | 55 | 0-0  | 0.00-0.00   | 0-2  | 0.00-3.51  |
| Ibaraki   |                        |    |      |             |      |            |
|           | Apr 5 to Apr 11, 2021  | 56 | 0-0  | 0.00-0.00   | 0-11 | 0.00-16.42 |
|           | Apr 12 to Apr 18, 2021 | 85 | 4-20 | 6.15-30.77  | 0-0  | 0.00-0.00  |
|           | Apr 19 to Apr 25, 2021 | 53 | 0-0  | 0.00-0.00   | 0-11 | 0.00-17.19 |
|           | Apr 26 to May 2, 2021  | 59 | 0-0  | 0.00-0.00   | 0-3  | 0.00-4.84  |
|           | May 3 to May 9, 2021   | 71 | 0-10 | 0.00-16.39  | 0-0  | 0.00-0.00  |
|           | May 10 to May 16, 2021 | 80 | 3-19 | 4.92-31.15  | 0-0  | 0.00-0.00  |
|           | May 17 to May 23, 2021 | 68 | 0-10 | 0.00-17.24  | 0-0  | 0.00-0.00  |
|           | May 24 to May 30, 2021 | 68 | 0-11 | 0.00-19.30  | 0-0  | 0.00-0.00  |
| Tochigi   |                        |    |      |             |      |            |
|           | Apr 5 to Apr 11, 2021  | 49 | 0-0  | 0.00-0.00   | 0-13 | 0.00-20.97 |
|           | Apr 12 to Apr 18, 2021 | 78 | 1-18 | 1.67-30.00  | 0-0  | 0.00-0.00  |
|           | Apr 19 to Apr 25, 2021 | 70 | 0-12 | 0.00-20.69  | 0-0  | 0.00-0.00  |
|           | Apr 26 to May 2, 2021  | 72 | 0-16 | 0.00-28.57  | 0-0  | 0.00-0.00  |
|           | May 3 to May 9, 2021   | 52 | 0-0  | 0.00-0.00   | 0-2  | 0.00-3.70  |
|           | May 10 to May 16, 2021 | 53 | 0-1  | 0.00-1.92   | 0-0  | 0.00-0.00  |

|          |                        |     |       |             |      |           |
|----------|------------------------|-----|-------|-------------|------|-----------|
|          | May 17 to May 23, 2021 | 65  | 0-14  | 0.00-27.45  | 0-0  | 0.00-0.00 |
|          | May 24 to May 30, 2021 | 61  | 0-11  | 0.00-22.00  | 0-0  | 0.00-0.00 |
| Gunma    |                        |     |       |             |      |           |
|          | Apr 5 to Apr 11, 2021  | 76  | 0-2   | 0.00-2.70   | 0-0  | 0.00-0.00 |
|          | Apr 12 to Apr 18, 2021 | 86  | 0-13  | 0.00-17.81  | 0-0  | 0.00-0.00 |
|          | Apr 19 to Apr 25, 2021 | 104 | 17-34 | 24.29-48.57 | 0-0  | 0.00-0.00 |
|          | Apr 26 to May 2, 2021  | 76  | 0-7   | 0.00-10.14  | 0-0  | 0.00-0.00 |
|          | May 3 to May 9, 2021   | 77  | 0-9   | 0.00-13.24  | 0-0  | 0.00-0.00 |
|          | May 10 to May 16, 2021 | 73  | 0-8   | 0.00-12.31  | 0-0  | 0.00-0.00 |
|          | May 17 to May 23, 2021 | 59  | 0-0   | 0.00-0.00   | 0-6  | 0.00-9.23 |
|          | May 24 to May 30, 2021 | 81  | 0-15  | 0.00-22.73  | 0-0  | 0.00-0.00 |
| Saitama  |                        |     |       |             |      |           |
|          | Apr 5 to Apr 11, 2021  | 169 | 0-2   | 0.00-1.20   | 0-0  | 0.00-0.00 |
|          | Apr 12 to Apr 18, 2021 | 168 | 0-5   | 0.00-3.07   | 0-0  | 0.00-0.00 |
|          | Apr 19 to Apr 25, 2021 | 173 | 0-10  | 0.00-6.13   | 0-0  | 0.00-0.00 |
|          | Apr 26 to May 2, 2021  | 198 | 10-35 | 6.13-21.47  | 0-0  | 0.00-0.00 |
|          | May 3 to May 9, 2021   | 191 | 4-29  | 2.47-17.90  | 0-0  | 0.00-0.00 |
|          | May 10 to May 16, 2021 | 165 | 0-6   | 0.00-3.77   | 0-0  | 0.00-0.00 |
|          | May 17 to May 23, 2021 | 165 | 0-7   | 0.00-4.43   | 0-0  | 0.00-0.00 |
|          | May 24 to May 30, 2021 | 171 | 0-15  | 0.00-9.62   | 0-0  | 0.00-0.00 |
| Chiba    |                        |     |       |             |      |           |
|          | Apr 5 to Apr 11, 2021  | 126 | 0-4   | 0.00-3.28   | 0-0  | 0.00-0.00 |
|          | Apr 12 to Apr 18, 2021 | 124 | 0-2   | 0.00-1.64   | 0-0  | 0.00-0.00 |
|          | Apr 19 to Apr 25, 2021 | 147 | 1-23  | 0.81-18.55  | 0-0  | 0.00-0.00 |
|          | Apr 26 to May 2, 2021  | 127 | 0-2   | 0.00-1.60   | 0-0  | 0.00-0.00 |
|          | May 3 to May 9, 2021   | 136 | 0-11  | 0.00-8.80   | 0-0  | 0.00-0.00 |
|          | May 10 to May 16, 2021 | 135 | 0-13  | 0.00-10.66  | 0-0  | 0.00-0.00 |
|          | May 17 to May 23, 2021 | 121 | 0-0   | 0.00-0.00   | 0-0  | 0.00-0.00 |
|          | May 24 to May 30, 2021 | 129 | 0-6   | 0.00-4.88   | 0-0  | 0.00-0.00 |
| Tokyo    |                        |     |       |             |      |           |
|          | Apr 5 to Apr 11, 2021  | 277 | 0-0   | 0.00-0.00   | 0-23 | 0.00-7.67 |
|          | Apr 12 to Apr 18, 2021 | 304 | 0-6   | 0.00-2.01   | 0-0  | 0.00-0.00 |
|          | Apr 19 to Apr 25, 2021 | 302 | 0-6   | 0.00-2.03   | 0-0  | 0.00-0.00 |
|          | Apr 26 to May 2, 2021  | 326 | 0-34  | 0.00-11.64  | 0-0  | 0.00-0.00 |
|          | May 3 to May 9, 2021   | 358 | 36-69 | 12.46-23.88 | 0-0  | 0.00-0.00 |
|          | May 10 to May 16, 2021 | 322 | 5-39  | 1.77-13.78  | 0-0  | 0.00-0.00 |
|          | May 17 to May 23, 2021 | 322 | 8-42  | 2.86-15.00  | 0-0  | 0.00-0.00 |
|          | May 24 to May 30, 2021 | 265 | 0-0   | 0.00-0.00   | 0-14 | 0.00-5.02 |
| Kanagawa |                        |     |       |             |      |           |
|          | Apr 5 to Apr 11, 2021  | 268 | 0-20  | 0.00-8.06   | 0-0  | 0.00-0.00 |
|          | Apr 12 to Apr 18, 2021 | 258 | 0-12  | 0.00-4.88   | 0-0  | 0.00-0.00 |
|          | Apr 19 to Apr 25, 2021 | 238 | 0-0   | 0.00-0.00   | 0-8  | 0.00-3.25 |
|          | Apr 26 to May 2, 2021  | 303 | 23-56 | 9.31-22.67  | 0-0  | 0.00-0.00 |
|          | May 3 to May 9, 2021   | 311 | 33-66 | 13.47-26.94 | 0-0  | 0.00-0.00 |
|          | May 10 to May 16, 2021 | 278 | 0-31  | 0.00-12.55  | 0-0  | 0.00-0.00 |
|          | May 17 to May 23, 2021 | 282 | 5-38  | 2.05-15.57  | 0-0  | 0.00-0.00 |

|                        |                        |     |            |            |           |            |
|------------------------|------------------------|-----|------------|------------|-----------|------------|
| Niigata                | May 24 to May 30, 2021 | 276 | 0-32       | 0.00-13.11 | 0-0       | 0.00-0.00  |
|                        | Apr 5 to Apr 11, 2021  | 111 | 0-12       | 0.00-12.12 | 0-0       | 0.00-0.00  |
|                        | Apr 12 to Apr 18, 2021 | 111 | 0-11       | 0.00-11.00 | 0-0       | 0.00-0.00  |
|                        | Apr 19 to Apr 25, 2021 | 103 | 0-3        | 0.00-3.00  | 0-0       | 0.00-0.00  |
|                        | Apr 26 to May 2, 2021  | 96  | 0-0        | 0.00-0.00  | 0-5       | 0.00-4.95  |
|                        | May 3 to May 9, 2021   | 103 | 0-4        | 0.00-4.04  | 0-0       | 0.00-0.00  |
|                        | May 10 to May 16, 2021 | 126 | 8-28       | 8.16-28.57 | 0-0       | 0.00-0.00  |
|                        | May 17 to May 23, 2021 | 109 | 0-14       | 0.00-14.74 | 0-0       | 0.00-0.00  |
| Toyama                 | May 24 to May 30, 2021 | 107 | 0-14       | 0.00-15.05 | 0-0       | 0.00-0.00  |
|                        | Apr 5 to Apr 11, 2021  | 42  | 0-4        | 0.00-10.53 | 0-0       | 0.00-0.00  |
|                        | Apr 12 to Apr 18, 2021 | 48  | 0-10       | 0.00-26.32 | 0-0       | 0.00-0.00  |
|                        | Apr 19 to Apr 25, 2021 | 47  | 0-10       | 0.00-27.03 | 0-0       | 0.00-0.00  |
|                        | Apr 26 to May 2, 2021  | 50  | 1-13       | 2.70-35.14 | 0-0       | 0.00-0.00  |
|                        | May 3 to May 9, 2021   | 44  | 0-7        | 0.00-18.92 | 0-0       | 0.00-0.00  |
|                        | May 10 to May 16, 2021 | 30  | 0-0        | 0.00-0.00  | 0-7       | 0.00-18.92 |
|                        | May 17 to May 23, 2021 | 33  | 0-0        | 0.00-0.00  | 0-4       | 0.00-10.81 |
| Ishikawa               | May 24 to May 30, 2021 | 33  | 0-0        | 0.00-0.00  | 0-3       | 0.00-8.33  |
|                        | Apr 5 to Apr 11, 2021  | 46  | 0-5        | 0.00-12.20 | 0-0       | 0.00-0.00  |
|                        | Apr 12 to Apr 18, 2021 | 48  | 0-8        | 0.00-20.00 | 0-0       | 0.00-0.00  |
|                        | Apr 19 to Apr 25, 2021 | 42  | 0-2        | 0.00-5.00  | 0-0       | 0.00-0.00  |
|                        | Apr 26 to May 2, 2021  | 40  | 0-0        | 0.00-0.00  | 0-1       | 0.00-2.44  |
|                        | May 3 to May 9, 2021   | 39  | 0-0        | 0.00-0.00  | 0-2       | 0.00-4.88  |
|                        | May 10 to May 16, 2021 | 38  | 0-0        | 0.00-0.00  | 0-3       | 0.00-7.32  |
|                        | May 17 to May 23, 2021 | 47  | 0-7        | 0.00-17.50 | 0-0       | 0.00-0.00  |
| Fukui                  | May 24 to May 30, 2021 | 43  | 0-3        | 0.00-7.50  | 0-0       | 0.00-0.00  |
|                        | Apr 5 to Apr 11, 2021  | 31  | 0-2        | 0.00-6.90  | 0-0       | 0.00-0.00  |
|                        | Apr 12 to Apr 18, 2021 | 32  | 0-4        | 0.00-14.29 | 0-0       | 0.00-0.00  |
|                        | Apr 19 to Apr 25, 2021 | 34  | 0-6        | 0.00-21.43 | 0-0       | 0.00-0.00  |
|                        | Apr 26 to May 2, 2021  | 33  | 0-6        | 0.00-22.22 | 0-0       | 0.00-0.00  |
|                        | May 3 to May 9, 2021   | 33  | 0-6        | 0.00-22.22 | 0-0       | 0.00-0.00  |
|                        | May 10 to May 16, 2021 | 31  | 0-5        | 0.00-19.23 | 0-0       | 0.00-0.00  |
|                        | May 17 to May 23, 2021 | 37  | 1-11       | 3.85-42.31 | 0-0       | 0.00-0.00  |
| Yamanashi              | May 24 to May 30, 2021 | 27  | 0-1        | 0.00-3.85  | 0-0       | 0.00-0.00  |
|                        | Apr 5 to Apr 11, 2021  | 30  | 0-2        | 0.00-7.14  | 0-0       | 0.00-0.00  |
|                        | Apr 12 to Apr 18, 2021 | 27  | 0-0        | 0.00-0.00  | 0-0       | 0.00-0.00  |
|                        | Apr 19 to Apr 25, 2021 | 30  | 0-3        | 0.00-11.11 | 0-0       | 0.00-0.00  |
|                        | Apr 26 to May 2, 2021  | 40  | 2-13       | 7.41-48.15 | 0-0       | 0.00-0.00  |
|                        | May 3 to May 9, 2021   | 31  | 0-5        | 0.00-19.23 | 0-0       | 0.00-0.00  |
|                        | May 10 to May 16, 2021 | 32  | 0-7        | 0.00-28.00 | 0-0       | 0.00-0.00  |
|                        | May 17 to May 23, 2021 | 30  | 0-5        | 0.00-20.00 | 0-0       | 0.00-0.00  |
| May 24 to May 30, 2021 | 28                     | 0-4 | 0.00-16.67 | 0-0        | 0.00-0.00 |            |

Nagano

|                        |     |      |            |      |            |
|------------------------|-----|------|------------|------|------------|
| Apr 5 to Apr 11, 2021  | 89  | 0-0  | 0.00-0.00  | 0-3  | 0.00-3.26  |
| Apr 12 to Apr 18, 2021 | 91  | 0-0  | 0.00-0.00  | 0-0  | 0.00-0.00  |
| Apr 19 to Apr 25, 2021 | 94  | 0-2  | 0.00-2.17  | 0-0  | 0.00-0.00  |
| Apr 26 to May 2, 2021  | 102 | 0-11 | 0.00-12.09 | 0-0  | 0.00-0.00  |
| May 3 to May 9, 2021   | 76  | 0-0  | 0.00-0.00  | 0-12 | 0.00-13.64 |
| May 10 to May 16, 2021 | 103 | 0-15 | 0.00-17.05 | 0-0  | 0.00-0.00  |
| May 17 to May 23, 2021 | 95  | 0-7  | 0.00-7.95  | 0-0  | 0.00-0.00  |
| May 24 to May 30, 2021 | 81  | 0-0  | 0.00-0.00  | 0-6  | 0.00-6.90  |

Gifu

|                        |    |      |            |      |            |
|------------------------|----|------|------------|------|------------|
| Apr 5 to Apr 11, 2021  | 77 | 0-8  | 0.00-11.59 | 0-0  | 0.00-0.00  |
| Apr 12 to Apr 18, 2021 | 74 | 0-6  | 0.00-8.82  | 0-0  | 0.00-0.00  |
| Apr 19 to Apr 25, 2021 | 79 | 0-12 | 0.00-17.91 | 0-0  | 0.00-0.00  |
| Apr 26 to May 2, 2021  | 71 | 0-4  | 0.00-5.97  | 0-0  | 0.00-0.00  |
| May 3 to May 9, 2021   | 81 | 0-15 | 0.00-22.73 | 0-0  | 0.00-0.00  |
| May 10 to May 16, 2021 | 64 | 0-0  | 0.00-0.00  | 0-2  | 0.00-3.03  |
| May 17 to May 23, 2021 | 76 | 0-12 | 0.00-18.75 | 0-0  | 0.00-0.00  |
| May 24 to May 30, 2021 | 47 | 0-0  | 0.00-0.00  | 2-17 | 3.13-26.56 |

Shizuoka

|                        |     |      |            |      |            |
|------------------------|-----|------|------------|------|------------|
| Apr 5 to Apr 11, 2021  | 140 | 0-0  | 0.00-0.00  | 0-22 | 0.00-13.58 |
| Apr 12 to Apr 18, 2021 | 172 | 0-12 | 0.00-7.50  | 0-0  | 0.00-0.00  |
| Apr 19 to Apr 25, 2021 | 161 | 0-2  | 0.00-1.26  | 0-0  | 0.00-0.00  |
| Apr 26 to May 2, 2021  | 171 | 0-17 | 0.00-11.04 | 0-0  | 0.00-0.00  |
| May 3 to May 9, 2021   | 151 | 0-0  | 0.00-0.00  | 0-1  | 0.00-0.66  |
| May 10 to May 16, 2021 | 172 | 0-23 | 0.00-15.44 | 0-0  | 0.00-0.00  |
| May 17 to May 23, 2021 | 171 | 0-23 | 0.00-15.54 | 0-0  | 0.00-0.00  |
| May 24 to May 30, 2021 | 142 | 0-0  | 0.00-0.00  | 0-6  | 0.00-4.05  |

Aichi

|                        |     |      |            |      |            |
|------------------------|-----|------|------------|------|------------|
| Apr 5 to Apr 11, 2021  | 187 | 0-0  | 0.00-0.00  | 0-24 | 0.00-11.37 |
| Apr 12 to Apr 18, 2021 | 199 | 0-0  | 0.00-0.00  | 0-10 | 0.00-4.78  |
| Apr 19 to Apr 25, 2021 | 192 | 0-0  | 0.00-0.00  | 0-16 | 0.00-7.69  |
| Apr 26 to May 2, 2021  | 199 | 0-0  | 0.00-0.00  | 0-7  | 0.00-3.40  |
| May 3 to May 9, 2021   | 210 | 0-7  | 0.00-3.45  | 0-0  | 0.00-0.00  |
| May 10 to May 16, 2021 | 209 | 0-9  | 0.00-4.50  | 0-0  | 0.00-0.00  |
| May 17 to May 23, 2021 | 194 | 0-0  | 0.00-0.00  | 0-3  | 0.00-1.52  |
| May 24 to May 30, 2021 | 218 | 0-22 | 0.00-11.22 | 0-0  | 0.00-0.00  |

Mie

|                        |    |      |            |      |            |
|------------------------|----|------|------------|------|------------|
| Apr 5 to Apr 11, 2021  | 70 | 0-0  | 0.00-0.00  | 0-4  | 0.00-5.41  |
| Apr 12 to Apr 18, 2021 | 82 | 0-10 | 0.00-13.89 | 0-0  | 0.00-0.00  |
| Apr 19 to Apr 25, 2021 | 73 | 0-4  | 0.00-5.80  | 0-0  | 0.00-0.00  |
| Apr 26 to May 2, 2021  | 70 | 0-3  | 0.00-4.48  | 0-0  | 0.00-0.00  |
| May 3 to May 9, 2021   | 61 | 0-0  | 0.00-0.00  | 0-5  | 0.00-7.58  |
| May 10 to May 16, 2021 | 80 | 0-14 | 0.00-21.21 | 0-0  | 0.00-0.00  |
| May 17 to May 23, 2021 | 88 | 5-22 | 7.58-33.33 | 0-0  | 0.00-0.00  |
| May 24 to May 30, 2021 | 55 | 0-0  | 0.00-0.00  | 0-12 | 0.00-17.91 |

Shiga

|          |                        |     |       |            |      |            |
|----------|------------------------|-----|-------|------------|------|------------|
|          | Apr 5 to Apr 11, 2021  | 44  | 2-15  | 6.90-51.72 | 0-0  | 0.00-0.00  |
|          | Apr 12 to Apr 18, 2021 | 39  | 0-10  | 0.00-34.48 | 0-0  | 0.00-0.00  |
|          | Apr 19 to Apr 25, 2021 | 28  | 0-0   | 0.00-0.00  | 0-0  | 0.00-0.00  |
|          | Apr 26 to May 2, 2021  | 38  | 0-9   | 0.00-31.03 | 0-0  | 0.00-0.00  |
|          | May 3 to May 9, 2021   | 30  | 0-1   | 0.00-3.45  | 0-0  | 0.00-0.00  |
|          | May 10 to May 16, 2021 | 38  | 0-9   | 0.00-31.03 | 0-0  | 0.00-0.00  |
|          | May 17 to May 23, 2021 | 30  | 0-0   | 0.00-0.00  | 0-0  | 0.00-0.00  |
|          | May 24 to May 30, 2021 | 36  | 0-7   | 0.00-24.14 | 0-0  | 0.00-0.00  |
| Kyoto    |                        |     |       |            |      |            |
|          | Apr 5 to Apr 11, 2021  | 67  | 0-1   | 0.00-1.52  | 0-0  | 0.00-0.00  |
|          | Apr 12 to Apr 18, 2021 | 61  | 0-0   | 0.00-0.00  | 0-3  | 0.00-4.69  |
|          | Apr 19 to Apr 25, 2021 | 71  | 0-6   | 0.00-9.23  | 0-0  | 0.00-0.00  |
|          | Apr 26 to May 2, 2021  | 66  | 0-1   | 0.00-1.54  | 0-0  | 0.00-0.00  |
|          | May 3 to May 9, 2021   | 74  | 0-10  | 0.00-15.63 | 0-0  | 0.00-0.00  |
|          | May 10 to May 16, 2021 | 70  | 0-8   | 0.00-12.90 | 0-0  | 0.00-0.00  |
|          | May 17 to May 23, 2021 | 53  | 0-0   | 0.00-0.00  | 0-8  | 0.00-13.11 |
|          | May 24 to May 30, 2021 | 73  | 0-12  | 0.00-19.67 | 0-0  | 0.00-0.00  |
| Osaka    |                        |     |       |            |      |            |
|          | Apr 5 to Apr 11, 2021  | 200 | 0-10  | 0.00-5.26  | 0-0  | 0.00-0.00  |
|          | Apr 12 to Apr 18, 2021 | 204 | 0-16  | 0.00-8.51  | 0-0  | 0.00-0.00  |
|          | Apr 19 to Apr 25, 2021 | 196 | 0-10  | 0.00-5.38  | 0-0  | 0.00-0.00  |
|          | Apr 26 to May 2, 2021  | 212 | 0-24  | 0.00-12.77 | 0-0  | 0.00-0.00  |
|          | May 3 to May 9, 2021   | 200 | 0-18  | 0.00-9.89  | 0-0  | 0.00-0.00  |
|          | May 10 to May 16, 2021 | 225 | 13-43 | 7.14-23.63 | 0-0  | 0.00-0.00  |
|          | May 17 to May 23, 2021 | 184 | 0-5   | 0.00-2.79  | 0-0  | 0.00-0.00  |
|          | May 24 to May 30, 2021 | 174 | 0-0   | 0.00-0.00  | 0-1  | 0.00-0.57  |
| Hyogo    |                        |     |       |            |      |            |
|          | Apr 5 to Apr 11, 2021  | 133 | 0-0   | 0.00-0.00  | 0-12 | 0.00-8.28  |
|          | Apr 12 to Apr 18, 2021 | 154 | 0-9   | 0.00-6.21  | 0-0  | 0.00-0.00  |
|          | Apr 19 to Apr 25, 2021 | 160 | 0-14  | 0.00-9.59  | 0-0  | 0.00-0.00  |
|          | Apr 26 to May 2, 2021  | 164 | 0-18  | 0.00-12.33 | 0-0  | 0.00-0.00  |
|          | May 3 to May 9, 2021   | 160 | 0-16  | 0.00-11.11 | 0-0  | 0.00-0.00  |
|          | May 10 to May 16, 2021 | 147 | 0-4   | 0.00-2.80  | 0-0  | 0.00-0.00  |
|          | May 17 to May 23, 2021 | 167 | 0-24  | 0.00-16.78 | 0-0  | 0.00-0.00  |
|          | May 24 to May 30, 2021 | 124 | 0-0   | 0.00-0.00  | 0-15 | 0.00-10.79 |
| Nara     |                        |     |       |            |      |            |
|          | Apr 5 to Apr 11, 2021  | 39  | 0-1   | 0.00-2.63  | 0-0  | 0.00-0.00  |
|          | Apr 12 to Apr 18, 2021 | 48  | 0-10  | 0.00-26.32 | 0-0  | 0.00-0.00  |
|          | Apr 19 to Apr 25, 2021 | 46  | 0-7   | 0.00-17.95 | 0-0  | 0.00-0.00  |
|          | Apr 26 to May 2, 2021  | 51  | 0-12  | 0.00-30.77 | 0-0  | 0.00-0.00  |
|          | May 3 to May 9, 2021   | 25  | 0-0   | 0.00-0.00  | 2-14 | 5.13-35.90 |
|          | May 10 to May 16, 2021 | 44  | 0-5   | 0.00-12.82 | 0-0  | 0.00-0.00  |
|          | May 17 to May 23, 2021 | 54  | 2-15  | 5.13-38.46 | 0-0  | 0.00-0.00  |
|          | May 24 to May 30, 2021 | 38  | 0-0   | 0.00-0.00  | 0-1  | 0.00-2.56  |
| Wakayama |                        |     |       |            |      |            |
|          | Apr 5 to Apr 11, 2021  | 36  | 0-0   | 0.00-0.00  | 0-0  | 0.00-0.00  |

|           |                        |    |      |            |     |            |
|-----------|------------------------|----|------|------------|-----|------------|
|           | Apr 12 to Apr 18, 2021 | 39 | 0-3  | 0.00-8.33  | 0-0 | 0.00-0.00  |
|           | Apr 19 to Apr 25, 2021 | 40 | 0-4  | 0.00-11.11 | 0-0 | 0.00-0.00  |
|           | Apr 26 to May 2, 2021  | 39 | 0-4  | 0.00-11.43 | 0-0 | 0.00-0.00  |
|           | May 3 to May 9, 2021   | 40 | 0-6  | 0.00-17.65 | 0-0 | 0.00-0.00  |
|           | May 10 to May 16, 2021 | 41 | 0-7  | 0.00-20.59 | 0-0 | 0.00-0.00  |
|           | May 17 to May 23, 2021 | 31 | 0-0  | 0.00-0.00  | 0-3 | 0.00-8.82  |
|           | May 24 to May 30, 2021 | 36 | 0-2  | 0.00-5.88  | 0-0 | 0.00-0.00  |
| Tottori   |                        |    |      |            |     |            |
|           | Apr 5 to Apr 11, 2021  | 35 | 0-9  | 0.00-34.62 | 0-0 | 0.00-0.00  |
|           | Apr 12 to Apr 18, 2021 | 32 | 0-6  | 0.00-23.08 | 0-0 | 0.00-0.00  |
|           | Apr 19 to Apr 25, 2021 | 34 | 0-9  | 0.00-36.00 | 0-0 | 0.00-0.00  |
|           | Apr 26 to May 2, 2021  | 22 | 0-0  | 0.00-0.00  | 0-4 | 0.00-15.38 |
|           | May 3 to May 9, 2021   | 29 | 0-3  | 0.00-11.54 | 0-0 | 0.00-0.00  |
|           | May 10 to May 16, 2021 | 30 | 0-4  | 0.00-15.38 | 0-0 | 0.00-0.00  |
|           | May 17 to May 23, 2021 | 19 | 0-0  | 0.00-0.00  | 0-6 | 0.00-24.00 |
|           | May 24 to May 30, 2021 | 29 | 0-5  | 0.00-20.83 | 0-0 | 0.00-0.00  |
| Shimane   |                        |    |      |            |     |            |
|           | Apr 5 to Apr 11, 2021  | 28 | 0-0  | 0.00-0.00  | 0-7 | 0.00-20.00 |
|           | Apr 12 to Apr 18, 2021 | 32 | 0-0  | 0.00-0.00  | 0-2 | 0.00-5.88  |
|           | Apr 19 to Apr 25, 2021 | 35 | 0-0  | 0.00-0.00  | 0-0 | 0.00-0.00  |
|           | Apr 26 to May 2, 2021  | 41 | 0-7  | 0.00-20.59 | 0-0 | 0.00-0.00  |
|           | May 3 to May 9, 2021   | 34 | 0-1  | 0.00-3.03  | 0-0 | 0.00-0.00  |
|           | May 10 to May 16, 2021 | 34 | 0-2  | 0.00-6.25  | 0-0 | 0.00-0.00  |
|           | May 17 to May 23, 2021 | 43 | 1-12 | 3.23-38.71 | 0-0 | 0.00-0.00  |
|           | May 24 to May 30, 2021 | 39 | 0-9  | 0.00-30.00 | 0-0 | 0.00-0.00  |
| Okayama   |                        |    |      |            |     |            |
|           | Apr 5 to Apr 11, 2021  | 53 | 0-0  | 0.00-0.00  | 0-3 | 0.00-5.36  |
|           | Apr 12 to Apr 18, 2021 | 54 | 0-0  | 0.00-0.00  | 0-1 | 0.00-1.82  |
|           | Apr 19 to Apr 25, 2021 | 58 | 0-3  | 0.00-5.45  | 0-0 | 0.00-0.00  |
|           | Apr 26 to May 2, 2021  | 66 | 0-12 | 0.00-22.22 | 0-0 | 0.00-0.00  |
|           | May 3 to May 9, 2021   | 52 | 0-0  | 0.00-0.00  | 0-1 | 0.00-1.89  |
|           | May 10 to May 16, 2021 | 60 | 0-7  | 0.00-13.21 | 0-0 | 0.00-0.00  |
|           | May 17 to May 23, 2021 | 69 | 1-16 | 1.89-30.19 | 0-0 | 0.00-0.00  |
|           | May 24 to May 30, 2021 | 53 | 0-0  | 0.00-0.00  | 0-0 | 0.00-0.00  |
| Hiroshima |                        |    |      |            |     |            |
|           | Apr 5 to Apr 11, 2021  | 82 | 0-2  | 0.00-2.50  | 0-0 | 0.00-0.00  |
|           | Apr 12 to Apr 18, 2021 | 78 | 0-0  | 0.00-0.00  | 0-1 | 0.00-1.27  |
|           | Apr 19 to Apr 25, 2021 | 87 | 0-9  | 0.00-11.54 | 0-0 | 0.00-0.00  |
|           | Apr 26 to May 2, 2021  | 71 | 0-0  | 0.00-0.00  | 0-6 | 0.00-7.79  |
|           | May 3 to May 9, 2021   | 98 | 5-23 | 6.67-30.67 | 0-0 | 0.00-0.00  |
|           | May 10 to May 16, 2021 | 72 | 0-0  | 0.00-0.00  | 0-2 | 0.00-2.70  |
|           | May 17 to May 23, 2021 | 88 | 0-16 | 0.00-22.22 | 0-0 | 0.00-0.00  |
|           | May 24 to May 30, 2021 | 71 | 0-1  | 0.00-1.43  | 0-0 | 0.00-0.00  |
| Yamaguchi |                        |    |      |            |     |            |
|           | Apr 5 to Apr 11, 2021  | 44 | 0-0  | 0.00-0.00  | 0-0 | 0.00-0.00  |
|           | Apr 12 to Apr 18, 2021 | 51 | 0-7  | 0.00-15.91 | 0-0 | 0.00-0.00  |

|           |                        |     |      |             |     |            |
|-----------|------------------------|-----|------|-------------|-----|------------|
|           | Apr 19 to Apr 25, 2021 | 46  | 0-2  | 0.00-4.55   | 0-0 | 0.00-0.00  |
|           | Apr 26 to May 2, 2021  | 55  | 0-12 | 0.00-27.91  | 0-0 | 0.00-0.00  |
|           | May 3 to May 9, 2021   | 41  | 0-0  | 0.00-0.00   | 0-3 | 0.00-6.82  |
|           | May 10 to May 16, 2021 | 37  | 0-0  | 0.00-0.00   | 0-7 | 0.00-15.91 |
|           | May 17 to May 23, 2021 | 47  | 0-2  | 0.00-4.44   | 0-0 | 0.00-0.00  |
|           | May 24 to May 30, 2021 | 41  | 0-0  | 0.00-0.00   | 0-4 | 0.00-8.89  |
| Tokushima |                        |     |      |             |     |            |
|           | Apr 5 to Apr 11, 2021  | 27  | 0-0  | 0.00-0.00   | 0-2 | 0.00-6.90  |
|           | Apr 12 to Apr 18, 2021 | 28  | 0-0  | 0.00-0.00   | 0-1 | 0.00-3.45  |
|           | Apr 19 to Apr 25, 2021 | 35  | 0-7  | 0.00-25.00  | 0-0 | 0.00-0.00  |
|           | Apr 26 to May 2, 2021  | 24  | 0-0  | 0.00-0.00   | 0-3 | 0.00-11.11 |
|           | May 3 to May 9, 2021   | 26  | 0-0  | 0.00-0.00   | 0-1 | 0.00-3.70  |
|           | May 10 to May 16, 2021 | 33  | 0-7  | 0.00-26.92  | 0-0 | 0.00-0.00  |
|           | May 17 to May 23, 2021 | 33  | 0-9  | 0.00-37.50  | 0-0 | 0.00-0.00  |
|           | May 24 to May 30, 2021 | 20  | 0-0  | 0.00-0.00   | 0-5 | 0.00-20.00 |
| Kagawa    |                        |     |      |             |     |            |
|           | Apr 5 to Apr 11, 2021  | 40  | 0-0  | 0.00-0.00   | 0-1 | 0.00-2.44  |
|           | Apr 12 to Apr 18, 2021 | 43  | 0-1  | 0.00-2.38   | 0-0 | 0.00-0.00  |
|           | Apr 19 to Apr 25, 2021 | 41  | 0-0  | 0.00-0.00   | 0-1 | 0.00-2.38  |
|           | Apr 26 to May 2, 2021  | 54  | 0-12 | 0.00-28.57  | 0-0 | 0.00-0.00  |
|           | May 3 to May 9, 2021   | 44  | 0-2  | 0.00-4.76   | 0-0 | 0.00-0.00  |
|           | May 10 to May 16, 2021 | 42  | 0-0  | 0.00-0.00   | 0-0 | 0.00-0.00  |
|           | May 17 to May 23, 2021 | 39  | 0-0  | 0.00-0.00   | 0-3 | 0.00-7.14  |
|           | May 24 to May 30, 2021 | 37  | 0-0  | 0.00-0.00   | 0-4 | 0.00-9.76  |
| Ehime     |                        |     |      |             |     |            |
|           | Apr 5 to Apr 11, 2021  | 49  | 0-3  | 0.00-6.52   | 0-0 | 0.00-0.00  |
|           | Apr 12 to Apr 18, 2021 | 43  | 0-0  | 0.00-0.00   | 0-2 | 0.00-4.44  |
|           | Apr 19 to Apr 25, 2021 | 51  | 0-7  | 0.00-15.91  | 0-0 | 0.00-0.00  |
|           | Apr 26 to May 2, 2021  | 52  | 0-9  | 0.00-20.93  | 0-0 | 0.00-0.00  |
|           | May 3 to May 9, 2021   | 52  | 0-10 | 0.00-23.81  | 0-0 | 0.00-0.00  |
|           | May 10 to May 16, 2021 | 45  | 0-3  | 0.00-7.14   | 0-0 | 0.00-0.00  |
|           | May 17 to May 23, 2021 | 35  | 0-0  | 0.00-0.00   | 0-5 | 0.00-12.50 |
|           | May 24 to May 30, 2021 | 41  | 0-1  | 0.00-2.50   | 0-0 | 0.00-0.00  |
| Kochi     |                        |     |      |             |     |            |
|           | Apr 5 to Apr 11, 2021  | 23  | 1-9  | 7.14-64.29  | 0-0 | 0.00-0.00  |
|           | Apr 12 to Apr 18, 2021 | 27  | 4-12 | 26.67-80.00 | 0-0 | 0.00-0.00  |
|           | Apr 19 to Apr 25, 2021 | 18  | 0-3  | 0.00-20.00  | 0-0 | 0.00-0.00  |
|           | Apr 26 to May 2, 2021  | 26  | 4-12 | 28.57-85.71 | 0-0 | 0.00-0.00  |
|           | May 3 to May 9, 2021   | 20  | 0-5  | 0.00-33.33  | 0-0 | 0.00-0.00  |
|           | May 10 to May 16, 2021 | 18  | 0-3  | 0.00-20.00  | 0-0 | 0.00-0.00  |
|           | May 17 to May 23, 2021 | 19  | 0-4  | 0.00-26.67  | 0-0 | 0.00-0.00  |
|           | May 24 to May 30, 2021 | 18  | 0-3  | 0.00-20.00  | 0-0 | 0.00-0.00  |
| Fukuoka   |                        |     |      |             |     |            |
|           | Apr 5 to Apr 11, 2021  | 102 | 0-0  | 0.00-0.00   | 0-4 | 0.00-3.77  |
|           | Apr 12 to Apr 18, 2021 | 102 | 0-0  | 0.00-0.00   | 0-2 | 0.00-1.92  |
|           | Apr 19 to Apr 25, 2021 | 110 | 0-6  | 0.00-5.77   | 0-0 | 0.00-0.00  |



|          |                        |     |       |             |      |            |
|----------|------------------------|-----|-------|-------------|------|------------|
|          | Apr 26 to May 2, 2021  | 118 | 0-17  | 0.00-16.83  | 0-0  | 0.00-0.00  |
|          | May 3 to May 9, 2021   | 104 | 0-6   | 0.00-6.12   | 0-0  | 0.00-0.00  |
|          | May 10 to May 16, 2021 | 116 | 0-18  | 0.00-18.37  | 0-0  | 0.00-0.00  |
|          | May 17 to May 23, 2021 | 99  | 0-2   | 0.00-2.06   | 0-0  | 0.00-0.00  |
|          | May 24 to May 30, 2021 | 112 | 0-15  | 0.00-15.46  | 0-0  | 0.00-0.00  |
| Saga     |                        |     |       |             |      |            |
|          | Apr 5 to Apr 11, 2021  | 24  | 0-0   | 0.00-0.00   | 0-0  | 0.00-0.00  |
|          | Apr 12 to Apr 18, 2021 | 29  | 0-6   | 0.00-26.09  | 0-0  | 0.00-0.00  |
|          | Apr 19 to Apr 25, 2021 | 25  | 0-2   | 0.00-8.70   | 0-0  | 0.00-0.00  |
|          | Apr 26 to May 2, 2021  | 17  | 0-0   | 0.00-0.00   | 0-5  | 0.00-22.73 |
|          | May 3 to May 9, 2021   | 42  | 11-20 | 50.00-90.91 | 0-0  | 0.00-0.00  |
|          | May 10 to May 16, 2021 | 24  | 0-2   | 0.00-9.09   | 0-0  | 0.00-0.00  |
|          | May 17 to May 23, 2021 | 22  | 0-0   | 0.00-0.00   | 0-0  | 0.00-0.00  |
|          | May 24 to May 30, 2021 | 18  | 0-0   | 0.00-0.00   | 0-3  | 0.00-14.29 |
| Nagasaki |                        |     |       |             |      |            |
|          | Apr 5 to Apr 11, 2021  | 44  | 0-6   | 0.00-15.79  | 0-0  | 0.00-0.00  |
|          | Apr 12 to Apr 18, 2021 | 34  | 0-0   | 0.00-0.00   | 0-4  | 0.00-10.53 |
|          | Apr 19 to Apr 25, 2021 | 49  | 0-11  | 0.00-28.95  | 0-0  | 0.00-0.00  |
|          | Apr 26 to May 2, 2021  | 35  | 0-0   | 0.00-0.00   | 0-3  | 0.00-7.89  |
|          | May 3 to May 9, 2021   | 52  | 2-15  | 5.41-40.54  | 0-0  | 0.00-0.00  |
|          | May 10 to May 16, 2021 | 53  | 4-16  | 10.81-43.24 | 0-0  | 0.00-0.00  |
|          | May 17 to May 23, 2021 | 24  | 0-0   | 0.00-0.00   | 0-12 | 0.00-33.33 |
|          | May 24 to May 30, 2021 | 48  | 0-12  | 0.00-33.33  | 0-0  | 0.00-0.00  |
| Kumamoto |                        |     |       |             |      |            |
|          | Apr 5 to Apr 11, 2021  | 64  | 2-16  | 4.17-33.33  | 0-0  | 0.00-0.00  |
|          | Apr 12 to Apr 18, 2021 | 62  | 2-16  | 4.35-34.78  | 0-0  | 0.00-0.00  |
|          | Apr 19 to Apr 25, 2021 | 51  | 0-4   | 0.00-8.51   | 0-0  | 0.00-0.00  |
|          | Apr 26 to May 2, 2021  | 65  | 3-17  | 6.25-35.42  | 0-0  | 0.00-0.00  |
|          | May 3 to May 9, 2021   | 66  | 4-18  | 8.33-37.50  | 0-0  | 0.00-0.00  |
|          | May 10 to May 16, 2021 | 58  | 0-10  | 0.00-20.83  | 0-0  | 0.00-0.00  |
|          | May 17 to May 23, 2021 | 49  | 0-1   | 0.00-2.08   | 0-0  | 0.00-0.00  |
|          | May 24 to May 30, 2021 | 65  | 4-17  | 8.33-35.42  | 0-0  | 0.00-0.00  |
| Oita     |                        |     |       |             |      |            |
|          | Apr 5 to Apr 11, 2021  | 44  | 0-0   | 0.00-0.00   | 0-6  | 0.00-12.00 |
|          | Apr 12 to Apr 18, 2021 | 71  | 6-20  | 11.76-39.22 | 0-0  | 0.00-0.00  |
|          | Apr 19 to Apr 25, 2021 | 66  | 2-16  | 4.00-32.00  | 0-0  | 0.00-0.00  |
|          | Apr 26 to May 2, 2021  | 59  | 0-10  | 0.00-20.41  | 0-0  | 0.00-0.00  |
|          | May 3 to May 9, 2021   | 50  | 0-1   | 0.00-2.04   | 0-0  | 0.00-0.00  |
|          | May 10 to May 16, 2021 | 52  | 0-2   | 0.00-4.00   | 0-0  | 0.00-0.00  |
|          | May 17 to May 23, 2021 | 36  | 0-0   | 0.00-0.00   | 0-14 | 0.00-28.00 |
|          | May 24 to May 30, 2021 | 41  | 0-0   | 0.00-0.00   | 0-8  | 0.00-16.33 |
| Miyazaki |                        |     |       |             |      |            |
|          | Apr 5 to Apr 11, 2021  | 31  | 0-0   | 0.00-0.00   | 0-9  | 0.00-22.50 |
|          | Apr 12 to Apr 18, 2021 | 40  | 0-1   | 0.00-2.56   | 0-0  | 0.00-0.00  |
|          | Apr 19 to Apr 25, 2021 | 54  | 3-15  | 7.69-38.46  | 0-0  | 0.00-0.00  |
|          | Apr 26 to May 2, 2021  | 38  | 0-0   | 0.00-0.00   | 0-0  | 0.00-0.00  |

|           |                        |    |      |             |     |            |
|-----------|------------------------|----|------|-------------|-----|------------|
|           | May 3 to May 9, 2021   | 50 | 0-12 | 0.00-31.58  | 0-0 | 0.00-0.00  |
|           | May 10 to May 16, 2021 | 31 | 0-0  | 0.00-0.00   | 0-7 | 0.00-18.42 |
|           | May 17 to May 23, 2021 | 46 | 0-7  | 0.00-17.95  | 0-0 | 0.00-0.00  |
|           | May 24 to May 30, 2021 | 40 | 0-2  | 0.00-5.26   | 0-0 | 0.00-0.00  |
| Kagoshima |                        |    |      |             |     |            |
|           | Apr 5 to Apr 11, 2021  | 61 | 0-9  | 0.00-17.31  | 0-0 | 0.00-0.00  |
|           | Apr 12 to Apr 18, 2021 | 65 | 0-13 | 0.00-25.00  | 0-0 | 0.00-0.00  |
|           | Apr 19 to Apr 25, 2021 | 72 | 6-22 | 12.00-44.00 | 0-0 | 0.00-0.00  |
|           | Apr 26 to May 2, 2021  | 56 | 0-6  | 0.00-12.00  | 0-0 | 0.00-0.00  |
|           | May 3 to May 9, 2021   | 42 | 0-0  | 0.00-0.00   | 0-7 | 0.00-14.29 |
|           | May 10 to May 16, 2021 | 50 | 0-0  | 0.00-0.00   | 0-0 | 0.00-0.00  |
|           | May 17 to May 23, 2021 | 55 | 0-5  | 0.00-10.00  | 0-0 | 0.00-0.00  |
|           | May 24 to May 30, 2021 | 59 | 0-11 | 0.00-22.92  | 0-0 | 0.00-0.00  |
| Okinawa   |                        |    |      |             |     |            |
|           | Apr 5 to Apr 11, 2021  | 37 | 0-6  | 0.00-19.35  | 0-0 | 0.00-0.00  |
|           | Apr 12 to Apr 18, 2021 | 33 | 0-2  | 0.00-6.45   | 0-0 | 0.00-0.00  |
|           | Apr 19 to Apr 25, 2021 | 27 | 0-0  | 0.00-0.00   | 0-3 | 0.00-10.00 |
|           | Apr 26 to May 2, 2021  | 34 | 0-4  | 0.00-13.33  | 0-0 | 0.00-0.00  |
|           | May 3 to May 9, 2021   | 27 | 0-0  | 0.00-0.00   | 0-3 | 0.00-10.00 |
|           | May 10 to May 16, 2021 | 37 | 0-7  | 0.00-23.33  | 0-0 | 0.00-0.00  |
|           | May 17 to May 23, 2021 | 29 | 0-0  | 0.00-0.00   | 0-1 | 0.00-3.33  |
|           | May 24 to May 30, 2021 | 41 | 0-11 | 0.00-36.67  | 0-0 | 0.00-0.00  |

---

**Table A.4: Weekly number of observed and excess/exiguous deaths in Japan and 47 prefectures for non-COVID-19-related deaths at homes from January 2020 through May 2021.**

| Prefecture | Week                   | Observed | Excess deaths | Percent excess | Exiguous deaths | Percent exiguous |
|------------|------------------------|----------|---------------|----------------|-----------------|------------------|
| Japan      |                        |          |               |                |                 |                  |
|            | Apr 5 to Apr 11, 2021  | 4409     | 0–424         | 0.00–10.64     | 0–0             | 0.00–0.00        |
|            | Apr 12 to Apr 18, 2021 | 4619     | 67–686        | 1.70–17.44     | 0–0             | 0.00–0.00        |
|            | Apr 19 to Apr 25, 2021 | 4584     | 100–727       | 2.59–18.85     | 0–0             | 0.00–0.00        |
|            | Apr 26 to May 2, 2021  | 4817     | 436–1042      | 11.55–27.60    | 0–0             | 0.00–0.00        |
|            | May 3 to May 9, 2021   | 4484     | 148–759       | 3.97–20.38     | 0–0             | 0.00–0.00        |
|            | May 10 to May 16, 2021 | 4473     | 230–847       | 6.34–23.36     | 0–0             | 0.00–0.00        |
|            | May 17 to May 23, 2021 | 4147     | 0–562         | 0.00–15.68     | 0–0             | 0.00–0.00        |
|            | May 24 to May 30, 2021 | 4010     | 0–443         | 0.00–12.42     | 0–0             | 0.00–0.00        |
| Hokkaido   |                        |          |               |                |                 |                  |
|            | Apr 5 to Apr 11, 2021  | 159      | 0–18          | 0.00–12.77     | 0–0             | 0.00–0.00        |
|            | Apr 12 to Apr 18, 2021 | 149      | 0–10          | 0.00–7.19      | 0–0             | 0.00–0.00        |
|            | Apr 19 to Apr 25, 2021 | 133      | 0–0           | 0.00–0.00      | 0–5             | 0.00–3.62        |
|            | Apr 26 to May 2, 2021  | 174      | 6–39          | 4.44–28.89     | 0–0             | 0.00–0.00        |
|            | May 3 to May 9, 2021   | 155      | 0–20          | 0.00–14.81     | 0–0             | 0.00–0.00        |
|            | May 10 to May 16, 2021 | 151      | 0–17          | 0.00–12.69     | 0–0             | 0.00–0.00        |
|            | May 17 to May 23, 2021 | 152      | 0–16          | 0.00–11.76     | 0–0             | 0.00–0.00        |
|            | May 24 to May 30, 2021 | 158      | 0–24          | 0.00–17.91     | 0–0             | 0.00–0.00        |
| Aomori     |                        |          |               |                |                 |                  |
|            | Apr 5 to Apr 11, 2021  | 36       | 0–0           | 0.00–0.00      | 0–5             | 0.00–12.20       |
|            | Apr 12 to Apr 18, 2021 | 40       | 0–0           | 0.00–0.00      | 0–0             | 0.00–0.00        |
|            | Apr 19 to Apr 25, 2021 | 43       | 0–4           | 0.00–10.26     | 0–0             | 0.00–0.00        |
|            | Apr 26 to May 2, 2021  | 43       | 0–5           | 0.00–13.16     | 0–0             | 0.00–0.00        |
|            | May 3 to May 9, 2021   | 31       | 0–0           | 0.00–0.00      | 0–7             | 0.00–18.42       |
|            | May 10 to May 16, 2021 | 38       | 0–0           | 0.00–0.00      | 0–0             | 0.00–0.00        |
|            | May 17 to May 23, 2021 | 44       | 0–5           | 0.00–12.82     | 0–0             | 0.00–0.00        |
|            | May 24 to May 30, 2021 | 38       | 0–1           | 0.00–2.70      | 0–0             | 0.00–0.00        |
| Iwate      |                        |          |               |                |                 |                  |
|            | Apr 5 to Apr 11, 2021  | 37       | 0–0           | 0.00–0.00      | 0–2             | 0.00–5.13        |
|            | Apr 12 to Apr 18, 2021 | 34       | 0–0           | 0.00–0.00      | 0–4             | 0.00–10.53       |
|            | Apr 19 to Apr 25, 2021 | 32       | 0–0           | 0.00–0.00      | 0–4             | 0.00–11.11       |
|            | Apr 26 to May 2, 2021  | 42       | 0–7           | 0.00–20.00     | 0–0             | 0.00–0.00        |
|            | May 3 to May 9, 2021   | 35       | 0–1           | 0.00–2.94      | 0–0             | 0.00–0.00        |
|            | May 10 to May 16, 2021 | 45       | 0–13          | 0.00–40.63     | 0–0             | 0.00–0.00        |
|            | May 17 to May 23, 2021 | 33       | 0–0           | 0.00–0.00      | 0–0             | 0.00–0.00        |
|            | May 24 to May 30, 2021 | 25       | 0–0           | 0.00–0.00      | 0–8             | 0.00–24.24       |
| Miyagi     |                        |          |               |                |                 |                  |
|            | Apr 5 to Apr 11, 2021  | 101      | 9–28          | 12.33–38.36    | 0–0             | 0.00–0.00        |
|            | Apr 12 to Apr 18, 2021 | 93       | 2–22          | 2.82–30.99     | 0–0             | 0.00–0.00        |
|            | Apr 19 to Apr 25, 2021 | 79       | 0–11          | 0.00–16.18     | 0–0             | 0.00–0.00        |
|            | Apr 26 to May 2, 2021  | 85       | 0–17          | 0.00–25.00     | 0–0             | 0.00–0.00        |
|            | May 3 to May 9, 2021   | 75       | 0–9           | 0.00–13.64     | 0–0             | 0.00–0.00        |

|           |                        |     |       |             |     |            |
|-----------|------------------------|-----|-------|-------------|-----|------------|
|           | May 10 to May 16, 2021 | 69  | 0-4   | 0.00-6.15   | 0-0 | 0.00-0.00  |
|           | May 17 to May 23, 2021 | 66  | 0-3   | 0.00-4.76   | 0-0 | 0.00-0.00  |
|           | May 24 to May 30, 2021 | 69  | 0-8   | 0.00-13.11  | 0-0 | 0.00-0.00  |
| Akita     |                        |     |       |             |     |            |
|           | Apr 5 to Apr 11, 2021  | 28  | 0-0   | 0.00-0.00   | 0-2 | 0.00-6.67  |
|           | Apr 12 to Apr 18, 2021 | 32  | 0-2   | 0.00-6.67   | 0-0 | 0.00-0.00  |
|           | Apr 19 to Apr 25, 2021 | 29  | 0-1   | 0.00-3.57   | 0-0 | 0.00-0.00  |
|           | Apr 26 to May 2, 2021  | 26  | 0-0   | 0.00-0.00   | 0-0 | 0.00-0.00  |
|           | May 3 to May 9, 2021   | 32  | 0-6   | 0.00-23.08  | 0-0 | 0.00-0.00  |
|           | May 10 to May 16, 2021 | 30  | 0-5   | 0.00-20.00  | 0-0 | 0.00-0.00  |
|           | May 17 to May 23, 2021 | 22  | 0-0   | 0.00-0.00   | 0-4 | 0.00-15.38 |
|           | May 24 to May 30, 2021 | 23  | 0-0   | 0.00-0.00   | 0-2 | 0.00-8.00  |
| Yamagata  |                        |     |       |             |     |            |
|           | Apr 5 to Apr 11, 2021  | 26  | 0-0   | 0.00-0.00   | 0-9 | 0.00-25.71 |
|           | Apr 12 to Apr 18, 2021 | 31  | 0-0   | 0.00-0.00   | 0-3 | 0.00-8.82  |
|           | Apr 19 to Apr 25, 2021 | 48  | 1-14  | 2.94-41.18  | 0-0 | 0.00-0.00  |
|           | Apr 26 to May 2, 2021  | 51  | 5-17  | 14.71-50.00 | 0-0 | 0.00-0.00  |
|           | May 3 to May 9, 2021   | 39  | 0-5   | 0.00-14.71  | 0-0 | 0.00-0.00  |
|           | May 10 to May 16, 2021 | 51  | 5-17  | 14.71-50.00 | 0-0 | 0.00-0.00  |
|           | May 17 to May 23, 2021 | 39  | 0-5   | 0.00-14.71  | 0-0 | 0.00-0.00  |
|           | May 24 to May 30, 2021 | 55  | 10-23 | 31.25-71.88 | 0-0 | 0.00-0.00  |
| Fukushima |                        |     |       |             |     |            |
|           | Apr 5 to Apr 11, 2021  | 70  | 0-5   | 0.00-7.69   | 0-0 | 0.00-0.00  |
|           | Apr 12 to Apr 18, 2021 | 96  | 14-32 | 21.88-50.00 | 0-0 | 0.00-0.00  |
|           | Apr 19 to Apr 25, 2021 | 66  | 0-4   | 0.00-6.45   | 0-0 | 0.00-0.00  |
|           | Apr 26 to May 2, 2021  | 89  | 11-27 | 17.74-43.55 | 0-0 | 0.00-0.00  |
|           | May 3 to May 9, 2021   | 60  | 0-0   | 0.00-0.00   | 0-1 | 0.00-1.64  |
|           | May 10 to May 16, 2021 | 70  | 0-10  | 0.00-16.67  | 0-0 | 0.00-0.00  |
|           | May 17 to May 23, 2021 | 69  | 0-10  | 0.00-16.95  | 0-0 | 0.00-0.00  |
|           | May 24 to May 30, 2021 | 57  | 0-0   | 0.00-0.00   | 0-1 | 0.00-1.72  |
| Ibaraki   |                        |     |       |             |     |            |
|           | Apr 5 to Apr 11, 2021  | 95  | 0-10  | 0.00-11.76  | 0-0 | 0.00-0.00  |
|           | Apr 12 to Apr 18, 2021 | 106 | 1-23  | 1.20-27.71  | 0-0 | 0.00-0.00  |
|           | Apr 19 to Apr 25, 2021 | 95  | 0-13  | 0.00-15.85  | 0-0 | 0.00-0.00  |
|           | Apr 26 to May 2, 2021  | 94  | 0-14  | 0.00-17.50  | 0-0 | 0.00-0.00  |
|           | May 3 to May 9, 2021   | 76  | 0-0   | 0.00-0.00   | 0-2 | 0.00-2.56  |
|           | May 10 to May 16, 2021 | 99  | 3-24  | 4.00-32.00  | 0-0 | 0.00-0.00  |
|           | May 17 to May 23, 2021 | 65  | 0-0   | 0.00-0.00   | 0-9 | 0.00-12.16 |
|           | May 24 to May 30, 2021 | 87  | 0-14  | 0.00-19.18  | 0-0 | 0.00-0.00  |
| Tochigi   |                        |     |       |             |     |            |
|           | Apr 5 to Apr 11, 2021  | 75  | 0-7   | 0.00-10.29  | 0-0 | 0.00-0.00  |
|           | Apr 12 to Apr 18, 2021 | 74  | 0-8   | 0.00-12.12  | 0-0 | 0.00-0.00  |
|           | Apr 19 to Apr 25, 2021 | 84  | 0-20  | 0.00-31.25  | 0-0 | 0.00-0.00  |
|           | Apr 26 to May 2, 2021  | 81  | 0-19  | 0.00-30.65  | 0-0 | 0.00-0.00  |
|           | May 3 to May 9, 2021   | 76  | 0-14  | 0.00-22.58  | 0-0 | 0.00-0.00  |
|           | May 10 to May 16, 2021 | 68  | 0-9   | 0.00-15.25  | 0-0 | 0.00-0.00  |

|          |                        |     |       |            |     |            |
|----------|------------------------|-----|-------|------------|-----|------------|
|          | May 17 to May 23, 2021 | 73  | 0-14  | 0.00-23.73 | 0-0 | 0.00-0.00  |
|          | May 24 to May 30, 2021 | 77  | 0-17  | 0.00-28.33 | 0-0 | 0.00-0.00  |
| Gunma    |                        |     |       |            |     |            |
|          | Apr 5 to Apr 11, 2021  | 61  | 0-1   | 0.00-1.67  | 0-0 | 0.00-0.00  |
|          | Apr 12 to Apr 18, 2021 | 72  | 0-13  | 0.00-22.03 | 0-0 | 0.00-0.00  |
|          | Apr 19 to Apr 25, 2021 | 74  | 0-14  | 0.00-23.33 | 0-0 | 0.00-0.00  |
|          | Apr 26 to May 2, 2021  | 73  | 0-14  | 0.00-23.73 | 0-0 | 0.00-0.00  |
|          | May 3 to May 9, 2021   | 62  | 0-3   | 0.00-5.08  | 0-0 | 0.00-0.00  |
|          | May 10 to May 16, 2021 | 57  | 0-0   | 0.00-0.00  | 0-1 | 0.00-1.72  |
|          | May 17 to May 23, 2021 | 48  | 0-0   | 0.00-0.00  | 0-9 | 0.00-15.79 |
|          | May 24 to May 30, 2021 | 57  | 0-0   | 0.00-0.00  | 0-1 | 0.00-1.72  |
| Saitama  |                        |     |       |            |     |            |
|          | Apr 5 to Apr 11, 2021  | 224 | 0-1   | 0.00-0.45  | 0-0 | 0.00-0.00  |
|          | Apr 12 to Apr 18, 2021 | 257 | 0-37  | 0.00-16.82 | 0-0 | 0.00-0.00  |
|          | Apr 19 to Apr 25, 2021 | 239 | 0-21  | 0.00-9.63  | 0-0 | 0.00-0.00  |
|          | Apr 26 to May 2, 2021  | 284 | 14-68 | 6.48-31.48 | 0-0 | 0.00-0.00  |
|          | May 3 to May 9, 2021   | 235 | 0-20  | 0.00-9.30  | 0-0 | 0.00-0.00  |
|          | May 10 to May 16, 2021 | 246 | 0-36  | 0.00-17.14 | 0-0 | 0.00-0.00  |
|          | May 17 to May 23, 2021 | 247 | 0-39  | 0.00-18.75 | 0-0 | 0.00-0.00  |
|          | May 24 to May 30, 2021 | 197 | 0-0   | 0.00-0.00  | 0-7 | 0.00-3.43  |
| Chiba    |                        |     |       |            |     |            |
|          | Apr 5 to Apr 11, 2021  | 220 | 0-10  | 0.00-4.76  | 0-0 | 0.00-0.00  |
|          | Apr 12 to Apr 18, 2021 | 248 | 0-38  | 0.00-18.10 | 0-0 | 0.00-0.00  |
|          | Apr 19 to Apr 25, 2021 | 238 | 0-32  | 0.00-15.53 | 0-0 | 0.00-0.00  |
|          | Apr 26 to May 2, 2021  | 229 | 0-29  | 0.00-14.50 | 0-0 | 0.00-0.00  |
|          | May 3 to May 9, 2021   | 236 | 0-40  | 0.00-20.41 | 0-0 | 0.00-0.00  |
|          | May 10 to May 16, 2021 | 229 | 0-39  | 0.00-20.53 | 0-0 | 0.00-0.00  |
|          | May 17 to May 23, 2021 | 202 | 0-14  | 0.00-7.45  | 0-0 | 0.00-0.00  |
|          | May 24 to May 30, 2021 | 183 | 0-0   | 0.00-0.00  | 0-1 | 0.00-0.54  |
| Tokyo    |                        |     |       |            |     |            |
|          | Apr 5 to Apr 11, 2021  | 518 | 0-16  | 0.00-3.19  | 0-0 | 0.00-0.00  |
|          | Apr 12 to Apr 18, 2021 | 581 | 0-83  | 0.00-16.67 | 0-0 | 0.00-0.00  |
|          | Apr 19 to Apr 25, 2021 | 574 | 0-85  | 0.00-17.38 | 0-0 | 0.00-0.00  |
|          | Apr 26 to May 2, 2021  | 578 | 7-99  | 1.46-20.67 | 0-0 | 0.00-0.00  |
|          | May 3 to May 9, 2021   | 500 | 0-26  | 0.00-5.49  | 0-0 | 0.00-0.00  |
|          | May 10 to May 16, 2021 | 487 | 0-17  | 0.00-3.62  | 0-0 | 0.00-0.00  |
|          | May 17 to May 23, 2021 | 501 | 0-30  | 0.00-6.37  | 0-0 | 0.00-0.00  |
|          | May 24 to May 30, 2021 | 466 | 0-8   | 0.00-1.75  | 0-0 | 0.00-0.00  |
| Kanagawa |                        |     |       |            |     |            |
|          | Apr 5 to Apr 11, 2021  | 351 | 0-21  | 0.00-6.36  | 0-0 | 0.00-0.00  |
|          | Apr 12 to Apr 18, 2021 | 363 | 0-34  | 0.00-10.33 | 0-0 | 0.00-0.00  |
|          | Apr 19 to Apr 25, 2021 | 369 | 0-39  | 0.00-11.82 | 0-0 | 0.00-0.00  |
|          | Apr 26 to May 2, 2021  | 416 | 28-91 | 8.62-28.00 | 0-0 | 0.00-0.00  |
|          | May 3 to May 9, 2021   | 378 | 0-59  | 0.00-18.50 | 0-0 | 0.00-0.00  |
|          | May 10 to May 16, 2021 | 385 | 7-68  | 2.21-21.45 | 0-0 | 0.00-0.00  |
|          | May 17 to May 23, 2021 | 329 | 0-15  | 0.00-4.78  | 0-0 | 0.00-0.00  |

|                        |                        |     |            |             |           |            |
|------------------------|------------------------|-----|------------|-------------|-----------|------------|
| Niigata                | May 24 to May 30, 2021 | 329 | 0-19       | 0.00-6.13   | 0-0       | 0.00-0.00  |
|                        | Apr 5 to Apr 11, 2021  | 68  | 0-9        | 0.00-15.25  | 0-0       | 0.00-0.00  |
|                        | Apr 12 to Apr 18, 2021 | 68  | 0-11       | 0.00-19.30  | 0-0       | 0.00-0.00  |
|                        | Apr 19 to Apr 25, 2021 | 53  | 0-0        | 0.00-0.00   | 0-3       | 0.00-5.36  |
|                        | Apr 26 to May 2, 2021  | 69  | 0-14       | 0.00-25.45  | 0-0       | 0.00-0.00  |
|                        | May 3 to May 9, 2021   | 66  | 0-12       | 0.00-22.22  | 0-0       | 0.00-0.00  |
|                        | May 10 to May 16, 2021 | 53  | 0-1        | 0.00-1.92   | 0-0       | 0.00-0.00  |
|                        | May 17 to May 23, 2021 | 45  | 0-0        | 0.00-0.00   | 0-6       | 0.00-11.76 |
| May 24 to May 30, 2021 | 58                     | 0-9 | 0.00-18.37 | 0-0         | 0.00-0.00 |            |
| Toyama                 | Apr 5 to Apr 11, 2021  | 44  | 1-13       | 3.23-41.94  | 0-0       | 0.00-0.00  |
|                        | Apr 12 to Apr 18, 2021 | 34  | 0-3        | 0.00-9.68   | 0-0       | 0.00-0.00  |
|                        | Apr 19 to Apr 25, 2021 | 34  | 0-3        | 0.00-9.68   | 0-0       | 0.00-0.00  |
|                        | Apr 26 to May 2, 2021  | 40  | 0-10       | 0.00-33.33  | 0-0       | 0.00-0.00  |
|                        | May 3 to May 9, 2021   | 43  | 2-13       | 6.67-43.33  | 0-0       | 0.00-0.00  |
|                        | May 10 to May 16, 2021 | 38  | 0-8        | 0.00-26.67  | 0-0       | 0.00-0.00  |
|                        | May 17 to May 23, 2021 | 26  | 0-0        | 0.00-0.00   | 0-4       | 0.00-13.33 |
|                        | May 24 to May 30, 2021 | 39  | 0-10       | 0.00-34.48  | 0-0       | 0.00-0.00  |
| Ishikawa               | Apr 5 to Apr 11, 2021  | 45  | 8-19       | 30.77-73.08 | 0-0       | 0.00-0.00  |
|                        | Apr 12 to Apr 18, 2021 | 46  | 8-20       | 30.77-76.92 | 0-0       | 0.00-0.00  |
|                        | Apr 19 to Apr 25, 2021 | 38  | 0-12       | 0.00-46.15  | 0-0       | 0.00-0.00  |
|                        | Apr 26 to May 2, 2021  | 32  | 0-7        | 0.00-28.00  | 0-0       | 0.00-0.00  |
|                        | May 3 to May 9, 2021   | 41  | 4-16       | 16.00-64.00 | 0-0       | 0.00-0.00  |
|                        | May 10 to May 16, 2021 | 28  | 0-2        | 0.00-7.69   | 0-0       | 0.00-0.00  |
|                        | May 17 to May 23, 2021 | 31  | 0-6        | 0.00-24.00  | 0-0       | 0.00-0.00  |
|                        | May 24 to May 30, 2021 | 28  | 0-3        | 0.00-12.00  | 0-0       | 0.00-0.00  |
| Fukui                  | Apr 5 to Apr 11, 2021  | 22  | 0-0        | 0.00-0.00   | 0-3       | 0.00-12.00 |
|                        | Apr 12 to Apr 18, 2021 | 29  | 0-5        | 0.00-20.83  | 0-0       | 0.00-0.00  |
|                        | Apr 19 to Apr 25, 2021 | 22  | 0-0        | 0.00-0.00   | 0-1       | 0.00-4.35  |
|                        | Apr 26 to May 2, 2021  | 28  | 0-6        | 0.00-27.27  | 0-0       | 0.00-0.00  |
|                        | May 3 to May 9, 2021   | 37  | 4-15       | 18.18-68.18 | 0-0       | 0.00-0.00  |
|                        | May 10 to May 16, 2021 | 30  | 0-9        | 0.00-42.86  | 0-0       | 0.00-0.00  |
|                        | May 17 to May 23, 2021 | 21  | 0-0        | 0.00-0.00   | 0-0       | 0.00-0.00  |
|                        | May 24 to May 30, 2021 | 24  | 0-3        | 0.00-14.29  | 0-0       | 0.00-0.00  |
| Yamanashi              | Apr 5 to Apr 11, 2021  | 25  | 0-0        | 0.00-0.00   | 0-4       | 0.00-13.79 |
|                        | Apr 12 to Apr 18, 2021 | 26  | 0-0        | 0.00-0.00   | 0-3       | 0.00-10.34 |
|                        | Apr 19 to Apr 25, 2021 | 23  | 0-0        | 0.00-0.00   | 0-5       | 0.00-17.86 |
|                        | Apr 26 to May 2, 2021  | 38  | 0-11       | 0.00-40.74  | 0-0       | 0.00-0.00  |
|                        | May 3 to May 9, 2021   | 36  | 0-10       | 0.00-38.46  | 0-0       | 0.00-0.00  |
|                        | May 10 to May 16, 2021 | 27  | 0-1        | 0.00-3.85   | 0-0       | 0.00-0.00  |
|                        | May 17 to May 23, 2021 | 44  | 7-18       | 26.92-69.23 | 0-0       | 0.00-0.00  |
|                        | May 24 to May 30, 2021 | 32  | 0-7        | 0.00-28.00  | 0-0       | 0.00-0.00  |

Nagano

|                        |    |      |            |     |           |
|------------------------|----|------|------------|-----|-----------|
| Apr 5 to Apr 11, 2021  | 83 | 0-16 | 0.00-23.88 | 0-0 | 0.00-0.00 |
| Apr 12 to Apr 18, 2021 | 84 | 0-18 | 0.00-27.27 | 0-0 | 0.00-0.00 |
| Apr 19 to Apr 25, 2021 | 78 | 0-12 | 0.00-18.18 | 0-0 | 0.00-0.00 |
| Apr 26 to May 2, 2021  | 72 | 0-8  | 0.00-12.50 | 0-0 | 0.00-0.00 |
| May 3 to May 9, 2021   | 67 | 0-4  | 0.00-6.35  | 0-0 | 0.00-0.00 |
| May 10 to May 16, 2021 | 56 | 0-0  | 0.00-0.00  | 0-5 | 0.00-8.20 |
| May 17 to May 23, 2021 | 79 | 2-20 | 3.39-33.90 | 0-0 | 0.00-0.00 |
| May 24 to May 30, 2021 | 64 | 0-5  | 0.00-8.47  | 0-0 | 0.00-0.00 |

Gifu

|                        |    |      |            |     |           |
|------------------------|----|------|------------|-----|-----------|
| Apr 5 to Apr 11, 2021  | 74 | 0-2  | 0.00-2.78  | 0-0 | 0.00-0.00 |
| Apr 12 to Apr 18, 2021 | 94 | 5-24 | 7.14-34.29 | 0-0 | 0.00-0.00 |
| Apr 19 to Apr 25, 2021 | 88 | 0-19 | 0.00-27.54 | 0-0 | 0.00-0.00 |
| Apr 26 to May 2, 2021  | 67 | 0-0  | 0.00-0.00  | 0-1 | 0.00-1.47 |
| May 3 to May 9, 2021   | 64 | 0-0  | 0.00-0.00  | 0-3 | 0.00-4.48 |
| May 10 to May 16, 2021 | 80 | 0-14 | 0.00-21.21 | 0-0 | 0.00-0.00 |
| May 17 to May 23, 2021 | 87 | 6-24 | 9.52-38.10 | 0-0 | 0.00-0.00 |
| May 24 to May 30, 2021 | 66 | 0-4  | 0.00-6.45  | 0-0 | 0.00-0.00 |

Shizuoka

|                        |     |      |            |     |           |
|------------------------|-----|------|------------|-----|-----------|
| Apr 5 to Apr 11, 2021  | 164 | 3-34 | 2.31-26.15 | 0-0 | 0.00-0.00 |
| Apr 12 to Apr 18, 2021 | 122 | 0-0  | 0.00-0.00  | 0-4 | 0.00-3.17 |
| Apr 19 to Apr 25, 2021 | 129 | 0-4  | 0.00-3.20  | 0-0 | 0.00-0.00 |
| Apr 26 to May 2, 2021  | 148 | 0-26 | 0.00-21.31 | 0-0 | 0.00-0.00 |
| May 3 to May 9, 2021   | 140 | 0-21 | 0.00-17.65 | 0-0 | 0.00-0.00 |
| May 10 to May 16, 2021 | 137 | 0-20 | 0.00-17.09 | 0-0 | 0.00-0.00 |
| May 17 to May 23, 2021 | 139 | 0-24 | 0.00-20.87 | 0-0 | 0.00-0.00 |
| May 24 to May 30, 2021 | 113 | 0-0  | 0.00-0.00  | 0-3 | 0.00-2.59 |

Aichi

|                        |     |       |             |     |           |
|------------------------|-----|-------|-------------|-----|-----------|
| Apr 5 to Apr 11, 2021  | 210 | 0-6   | 0.00-2.94   | 0-0 | 0.00-0.00 |
| Apr 12 to Apr 18, 2021 | 214 | 0-11  | 0.00-5.42   | 0-0 | 0.00-0.00 |
| Apr 19 to Apr 25, 2021 | 234 | 0-39  | 0.00-20.00  | 0-0 | 0.00-0.00 |
| Apr 26 to May 2, 2021  | 239 | 0-46  | 0.00-23.83  | 0-0 | 0.00-0.00 |
| May 3 to May 9, 2021   | 206 | 0-12  | 0.00-6.19   | 0-0 | 0.00-0.00 |
| May 10 to May 16, 2021 | 262 | 23-72 | 12.11-37.89 | 0-0 | 0.00-0.00 |
| May 17 to May 23, 2021 | 202 | 0-16  | 0.00-8.60   | 0-0 | 0.00-0.00 |
| May 24 to May 30, 2021 | 198 | 0-18  | 0.00-10.00  | 0-0 | 0.00-0.00 |

Mie

|                        |    |      |            |     |           |
|------------------------|----|------|------------|-----|-----------|
| Apr 5 to Apr 11, 2021  | 69 | 0-10 | 0.00-16.95 | 0-0 | 0.00-0.00 |
| Apr 12 to Apr 18, 2021 | 70 | 0-13 | 0.00-22.81 | 0-0 | 0.00-0.00 |
| Apr 19 to Apr 25, 2021 | 68 | 0-11 | 0.00-19.30 | 0-0 | 0.00-0.00 |
| Apr 26 to May 2, 2021  | 68 | 0-13 | 0.00-23.64 | 0-0 | 0.00-0.00 |
| May 3 to May 9, 2021   | 59 | 0-4  | 0.00-7.27  | 0-0 | 0.00-0.00 |
| May 10 to May 16, 2021 | 64 | 0-10 | 0.00-18.52 | 0-0 | 0.00-0.00 |
| May 17 to May 23, 2021 | 69 | 1-17 | 1.92-32.69 | 0-0 | 0.00-0.00 |
| May 24 to May 30, 2021 | 54 | 0-2  | 0.00-3.85  | 0-0 | 0.00-0.00 |

Shiga

|          |                        |     |        |             |     |            |
|----------|------------------------|-----|--------|-------------|-----|------------|
|          | Apr 5 to Apr 11, 2021  | 40  | 0-2    | 0.00-5.26   | 0-0 | 0.00-0.00  |
|          | Apr 12 to Apr 18, 2021 | 49  | 0-11   | 0.00-28.95  | 0-0 | 0.00-0.00  |
|          | Apr 19 to Apr 25, 2021 | 51  | 0-14   | 0.00-37.84  | 0-0 | 0.00-0.00  |
|          | Apr 26 to May 2, 2021  | 48  | 0-13   | 0.00-37.14  | 0-0 | 0.00-0.00  |
|          | May 3 to May 9, 2021   | 46  | 0-12   | 0.00-35.29  | 0-0 | 0.00-0.00  |
|          | May 10 to May 16, 2021 | 46  | 0-12   | 0.00-35.29  | 0-0 | 0.00-0.00  |
|          | May 17 to May 23, 2021 | 37  | 0-4    | 0.00-12.12  | 0-0 | 0.00-0.00  |
|          | May 24 to May 30, 2021 | 47  | 0-14   | 0.00-42.42  | 0-0 | 0.00-0.00  |
| Kyoto    |                        |     |        |             |     |            |
|          | Apr 5 to Apr 11, 2021  | 103 | 0-22   | 0.00-27.16  | 0-0 | 0.00-0.00  |
|          | Apr 12 to Apr 18, 2021 | 94  | 0-12   | 0.00-14.63  | 0-0 | 0.00-0.00  |
|          | Apr 19 to Apr 25, 2021 | 113 | 6-34   | 7.59-43.04  | 0-0 | 0.00-0.00  |
|          | Apr 26 to May 2, 2021  | 98  | 0-21   | 0.00-27.27  | 0-0 | 0.00-0.00  |
|          | May 3 to May 9, 2021   | 105 | 0-27   | 0.00-34.62  | 0-0 | 0.00-0.00  |
|          | May 10 to May 16, 2021 | 101 | 0-24   | 0.00-31.17  | 0-0 | 0.00-0.00  |
|          | May 17 to May 23, 2021 | 104 | 1-28   | 1.32-36.84  | 0-0 | 0.00-0.00  |
|          | May 24 to May 30, 2021 | 95  | 0-20   | 0.00-26.67  | 0-0 | 0.00-0.00  |
| Osaka    |                        |     |        |             |     |            |
|          | Apr 5 to Apr 11, 2021  | 358 | 0-29   | 0.00-8.81   | 0-0 | 0.00-0.00  |
|          | Apr 12 to Apr 18, 2021 | 359 | 0-38   | 0.00-11.84  | 0-0 | 0.00-0.00  |
|          | Apr 19 to Apr 25, 2021 | 373 | 0-61   | 0.00-19.55  | 0-0 | 0.00-0.00  |
|          | Apr 26 to May 2, 2021  | 419 | 54-117 | 17.88-38.74 | 0-0 | 0.00-0.00  |
|          | May 3 to May 9, 2021   | 399 | 34-98  | 11.30-32.56 | 0-0 | 0.00-0.00  |
|          | May 10 to May 16, 2021 | 377 | 15-80  | 5.05-26.94  | 0-0 | 0.00-0.00  |
|          | May 17 to May 23, 2021 | 360 | 4-67   | 1.37-22.87  | 0-0 | 0.00-0.00  |
|          | May 24 to May 30, 2021 | 332 | 0-46   | 0.00-16.08  | 0-0 | 0.00-0.00  |
| Hyogo    |                        |     |        |             |     |            |
|          | Apr 5 to Apr 11, 2021  | 242 | 1-44   | 0.51-22.22  | 0-0 | 0.00-0.00  |
|          | Apr 12 to Apr 18, 2021 | 257 | 16-60  | 8.12-30.46  | 0-0 | 0.00-0.00  |
|          | Apr 19 to Apr 25, 2021 | 253 | 18-62  | 9.42-32.46  | 0-0 | 0.00-0.00  |
|          | Apr 26 to May 2, 2021  | 281 | 53-95  | 28.49-51.08 | 0-0 | 0.00-0.00  |
|          | May 3 to May 9, 2021   | 257 | 30-73  | 16.30-39.67 | 0-0 | 0.00-0.00  |
|          | May 10 to May 16, 2021 | 264 | 40-82  | 21.98-45.05 | 0-0 | 0.00-0.00  |
|          | May 17 to May 23, 2021 | 215 | 0-36   | 0.00-20.11  | 0-0 | 0.00-0.00  |
|          | May 24 to May 30, 2021 | 257 | 38-80  | 21.47-45.20 | 0-0 | 0.00-0.00  |
| Nara     |                        |     |        |             |     |            |
|          | Apr 5 to Apr 11, 2021  | 57  | 0-8    | 0.00-16.33  | 0-0 | 0.00-0.00  |
|          | Apr 12 to Apr 18, 2021 | 60  | 0-11   | 0.00-22.45  | 0-0 | 0.00-0.00  |
|          | Apr 19 to Apr 25, 2021 | 44  | 0-0    | 0.00-0.00   | 0-3 | 0.00-6.38  |
|          | Apr 26 to May 2, 2021  | 59  | 0-13   | 0.00-28.26  | 0-0 | 0.00-0.00  |
|          | May 3 to May 9, 2021   | 50  | 0-4    | 0.00-8.70   | 0-0 | 0.00-0.00  |
|          | May 10 to May 16, 2021 | 57  | 0-12   | 0.00-26.67  | 0-0 | 0.00-0.00  |
|          | May 17 to May 23, 2021 | 39  | 0-0    | 0.00-0.00   | 0-6 | 0.00-13.33 |
|          | May 24 to May 30, 2021 | 43  | 0-0    | 0.00-0.00   | 0-0 | 0.00-0.00  |
| Wakayama |                        |     |        |             |     |            |
|          | Apr 5 to Apr 11, 2021  | 32  | 0-0    | 0.00-0.00   | 0-1 | 0.00-3.03  |



|           |                        |    |       |             |     |            |
|-----------|------------------------|----|-------|-------------|-----|------------|
|           | Apr 12 to Apr 18, 2021 | 39 | 0-7   | 0.00-21.88  | 0-0 | 0.00-0.00  |
|           | Apr 19 to Apr 25, 2021 | 42 | 0-11  | 0.00-35.48  | 0-0 | 0.00-0.00  |
|           | Apr 26 to May 2, 2021  | 36 | 0-5   | 0.00-16.13  | 0-0 | 0.00-0.00  |
|           | May 3 to May 9, 2021   | 46 | 2-16  | 6.67-53.33  | 0-0 | 0.00-0.00  |
|           | May 10 to May 16, 2021 | 41 | 0-12  | 0.00-41.38  | 0-0 | 0.00-0.00  |
|           | May 17 to May 23, 2021 | 37 | 0-6   | 0.00-19.35  | 0-0 | 0.00-0.00  |
|           | May 24 to May 30, 2021 | 28 | 0-0   | 0.00-0.00   | 0-3 | 0.00-9.68  |
| Tottori   |                        |    |       |             |     |            |
|           | Apr 5 to Apr 11, 2021  | 20 | 0-3   | 0.00-17.65  | 0-0 | 0.00-0.00  |
|           | Apr 12 to Apr 18, 2021 | 28 | 2-11  | 11.76-64.71 | 0-0 | 0.00-0.00  |
|           | Apr 19 to Apr 25, 2021 | 23 | 0-6   | 0.00-35.29  | 0-0 | 0.00-0.00  |
|           | Apr 26 to May 2, 2021  | 17 | 0-0   | 0.00-0.00   | 0-0 | 0.00-0.00  |
|           | May 3 to May 9, 2021   | 22 | 0-5   | 0.00-29.41  | 0-0 | 0.00-0.00  |
|           | May 10 to May 16, 2021 | 25 | 0-9   | 0.00-56.25  | 0-0 | 0.00-0.00  |
|           | May 17 to May 23, 2021 | 24 | 0-8   | 0.00-50.00  | 0-0 | 0.00-0.00  |
|           | May 24 to May 30, 2021 | 21 | 0-5   | 0.00-31.25  | 0-0 | 0.00-0.00  |
| Shimane   |                        |    |       |             |     |            |
|           | Apr 5 to Apr 11, 2021  | 22 | 0-1   | 0.00-4.76   | 0-0 | 0.00-0.00  |
|           | Apr 12 to Apr 18, 2021 | 34 | 3-13  | 14.29-61.90 | 0-0 | 0.00-0.00  |
|           | Apr 19 to Apr 25, 2021 | 17 | 0-0   | 0.00-0.00   | 0-4 | 0.00-19.05 |
|           | Apr 26 to May 2, 2021  | 20 | 0-0   | 0.00-0.00   | 0-0 | 0.00-0.00  |
|           | May 3 to May 9, 2021   | 29 | 0-10  | 0.00-52.63  | 0-0 | 0.00-0.00  |
|           | May 10 to May 16, 2021 | 17 | 0-0   | 0.00-0.00   | 0-2 | 0.00-10.53 |
|           | May 17 to May 23, 2021 | 16 | 0-0   | 0.00-0.00   | 0-3 | 0.00-15.79 |
|           | May 24 to May 30, 2021 | 14 | 0-0   | 0.00-0.00   | 0-5 | 0.00-26.32 |
| Okayama   |                        |    |       |             |     |            |
|           | Apr 5 to Apr 11, 2021  | 56 | 0-5   | 0.00-9.80   | 0-0 | 0.00-0.00  |
|           | Apr 12 to Apr 18, 2021 | 45 | 0-0   | 0.00-0.00   | 0-6 | 0.00-11.76 |
|           | Apr 19 to Apr 25, 2021 | 59 | 0-8   | 0.00-15.69  | 0-0 | 0.00-0.00  |
|           | Apr 26 to May 2, 2021  | 67 | 0-17  | 0.00-34.00  | 0-0 | 0.00-0.00  |
|           | May 3 to May 9, 2021   | 65 | 0-15  | 0.00-30.00  | 0-0 | 0.00-0.00  |
|           | May 10 to May 16, 2021 | 80 | 11-31 | 22.45-63.27 | 0-0 | 0.00-0.00  |
|           | May 17 to May 23, 2021 | 53 | 0-5   | 0.00-10.42  | 0-0 | 0.00-0.00  |
|           | May 24 to May 30, 2021 | 74 | 8-28  | 17.39-60.87 | 0-0 | 0.00-0.00  |
| Hiroshima |                        |    |       |             |     |            |
|           | Apr 5 to Apr 11, 2021  | 85 | 0-11  | 0.00-14.86  | 0-0 | 0.00-0.00  |
|           | Apr 12 to Apr 18, 2021 | 91 | 0-18  | 0.00-24.66  | 0-0 | 0.00-0.00  |
|           | Apr 19 to Apr 25, 2021 | 86 | 0-15  | 0.00-21.13  | 0-0 | 0.00-0.00  |
|           | Apr 26 to May 2, 2021  | 86 | 0-17  | 0.00-24.64  | 0-0 | 0.00-0.00  |
|           | May 3 to May 9, 2021   | 92 | 0-23  | 0.00-33.33  | 0-0 | 0.00-0.00  |
|           | May 10 to May 16, 2021 | 74 | 0-6   | 0.00-8.82   | 0-0 | 0.00-0.00  |
|           | May 17 to May 23, 2021 | 81 | 0-13  | 0.00-19.12  | 0-0 | 0.00-0.00  |
|           | May 24 to May 30, 2021 | 66 | 0-0   | 0.00-0.00   | 0-2 | 0.00-2.94  |
| Yamaguchi |                        |    |       |             |     |            |
|           | Apr 5 to Apr 11, 2021  | 42 | 0-0   | 0.00-0.00   | 0-2 | 0.00-4.55  |
|           | Apr 12 to Apr 18, 2021 | 45 | 0-2   | 0.00-4.65   | 0-0 | 0.00-0.00  |

|           |                        |     |      |             |      |            |
|-----------|------------------------|-----|------|-------------|------|------------|
|           | Apr 19 to Apr 25, 2021 | 56  | 0-15 | 0.00-36.59  | 0-0  | 0.00-0.00  |
|           | Apr 26 to May 2, 2021  | 44  | 0-4  | 0.00-10.00  | 0-0  | 0.00-0.00  |
|           | May 3 to May 9, 2021   | 43  | 0-3  | 0.00-7.50   | 0-0  | 0.00-0.00  |
|           | May 10 to May 16, 2021 | 39  | 0-1  | 0.00-2.63   | 0-0  | 0.00-0.00  |
|           | May 17 to May 23, 2021 | 54  | 2-17 | 5.41-45.95  | 0-0  | 0.00-0.00  |
|           | May 24 to May 30, 2021 | 38  | 0-2  | 0.00-5.56   | 0-0  | 0.00-0.00  |
| Tokushima |                        |     |      |             |      |            |
|           | Apr 5 to Apr 11, 2021  | 26  | 0-5  | 0.00-23.81  | 0-0  | 0.00-0.00  |
|           | Apr 12 to Apr 18, 2021 | 29  | 0-10 | 0.00-52.63  | 0-0  | 0.00-0.00  |
|           | Apr 19 to Apr 25, 2021 | 26  | 0-8  | 0.00-44.44  | 0-0  | 0.00-0.00  |
|           | Apr 26 to May 2, 2021  | 33  | 4-14 | 21.05-73.68 | 0-0  | 0.00-0.00  |
|           | May 3 to May 9, 2021   | 30  | 3-12 | 16.67-66.67 | 0-0  | 0.00-0.00  |
|           | May 10 to May 16, 2021 | 28  | 1-11 | 5.88-64.71  | 0-0  | 0.00-0.00  |
|           | May 17 to May 23, 2021 | 19  | 0-2  | 0.00-11.76  | 0-0  | 0.00-0.00  |
|           | May 24 to May 30, 2021 | 16  | 0-0  | 0.00-0.00   | 0-1  | 0.00-5.88  |
| Kagawa    |                        |     |      |             |      |            |
|           | Apr 5 to Apr 11, 2021  | 35  | 0-1  | 0.00-2.94   | 0-0  | 0.00-0.00  |
|           | Apr 12 to Apr 18, 2021 | 39  | 0-5  | 0.00-14.71  | 0-0  | 0.00-0.00  |
|           | Apr 19 to Apr 25, 2021 | 45  | 0-12 | 0.00-36.36  | 0-0  | 0.00-0.00  |
|           | Apr 26 to May 2, 2021  | 43  | 0-12 | 0.00-38.71  | 0-0  | 0.00-0.00  |
|           | May 3 to May 9, 2021   | 33  | 0-2  | 0.00-6.45   | 0-0  | 0.00-0.00  |
|           | May 10 to May 16, 2021 | 30  | 0-0  | 0.00-0.00   | 0-0  | 0.00-0.00  |
|           | May 17 to May 23, 2021 | 39  | 0-9  | 0.00-30.00  | 0-0  | 0.00-0.00  |
|           | May 24 to May 30, 2021 | 33  | 0-3  | 0.00-10.00  | 0-0  | 0.00-0.00  |
| Ehime     |                        |     |      |             |      |            |
|           | Apr 5 to Apr 11, 2021  | 57  | 0-5  | 0.00-9.62   | 0-0  | 0.00-0.00  |
|           | Apr 12 to Apr 18, 2021 | 70  | 4-20 | 8.00-40.00  | 0-0  | 0.00-0.00  |
|           | Apr 19 to Apr 25, 2021 | 67  | 2-18 | 4.08-36.73  | 0-0  | 0.00-0.00  |
|           | Apr 26 to May 2, 2021  | 50  | 0-2  | 0.00-4.17   | 0-0  | 0.00-0.00  |
|           | May 3 to May 9, 2021   | 68  | 5-21 | 10.64-44.68 | 0-0  | 0.00-0.00  |
|           | May 10 to May 16, 2021 | 50  | 0-4  | 0.00-8.70   | 0-0  | 0.00-0.00  |
|           | May 17 to May 23, 2021 | 36  | 0-0  | 0.00-0.00   | 0-10 | 0.00-21.74 |
|           | May 24 to May 30, 2021 | 46  | 0-1  | 0.00-2.22   | 0-0  | 0.00-0.00  |
| Kochi     |                        |     |      |             |      |            |
|           | Apr 5 to Apr 11, 2021  | 23  | 0-2  | 0.00-9.52   | 0-0  | 0.00-0.00  |
|           | Apr 12 to Apr 18, 2021 | 22  | 0-2  | 0.00-10.00  | 0-0  | 0.00-0.00  |
|           | Apr 19 to Apr 25, 2021 | 29  | 0-9  | 0.00-45.00  | 0-0  | 0.00-0.00  |
|           | Apr 26 to May 2, 2021  | 22  | 0-3  | 0.00-15.79  | 0-0  | 0.00-0.00  |
|           | May 3 to May 9, 2021   | 21  | 0-2  | 0.00-10.53  | 0-0  | 0.00-0.00  |
|           | May 10 to May 16, 2021 | 16  | 0-0  | 0.00-0.00   | 0-3  | 0.00-15.79 |
|           | May 17 to May 23, 2021 | 19  | 0-0  | 0.00-0.00   | 0-0  | 0.00-0.00  |
|           | May 24 to May 30, 2021 | 26  | 0-7  | 0.00-36.84  | 0-0  | 0.00-0.00  |
| Fukuoka   |                        |     |      |             |      |            |
|           | Apr 5 to Apr 11, 2021  | 145 | 0-19 | 0.00-15.08  | 0-0  | 0.00-0.00  |
|           | Apr 12 to Apr 18, 2021 | 141 | 0-16 | 0.00-12.80  | 0-0  | 0.00-0.00  |
|           | Apr 19 to Apr 25, 2021 | 130 | 0-6  | 0.00-4.84   | 0-0  | 0.00-0.00  |

|          |                        |     |       |              |     |            |
|----------|------------------------|-----|-------|--------------|-----|------------|
|          | Apr 26 to May 2, 2021  | 159 | 7-37  | 5.74-30.33   | 0-0 | 0.00-0.00  |
|          | May 3 to May 9, 2021   | 146 | 0-25  | 0.00-20.66   | 0-0 | 0.00-0.00  |
|          | May 10 to May 16, 2021 | 139 | 0-19  | 0.00-15.83   | 0-0 | 0.00-0.00  |
|          | May 17 to May 23, 2021 | 130 | 0-11  | 0.00-9.24    | 0-0 | 0.00-0.00  |
|          | May 24 to May 30, 2021 | 136 | 0-19  | 0.00-16.24   | 0-0 | 0.00-0.00  |
| Saga     |                        |     |       |              |     |            |
|          | Apr 5 to Apr 11, 2021  | 17  | 0-0   | 0.00-0.00    | 0-3 | 0.00-15.00 |
|          | Apr 12 to Apr 18, 2021 | 25  | 0-5   | 0.00-25.00   | 0-0 | 0.00-0.00  |
|          | Apr 19 to Apr 25, 2021 | 26  | 0-6   | 0.00-30.00   | 0-0 | 0.00-0.00  |
|          | Apr 26 to May 2, 2021  | 17  | 0-0   | 0.00-0.00    | 0-2 | 0.00-10.53 |
|          | May 3 to May 9, 2021   | 30  | 2-12  | 11.11-66.67  | 0-0 | 0.00-0.00  |
|          | May 10 to May 16, 2021 | 12  | 0-0   | 0.00-0.00    | 0-6 | 0.00-33.33 |
|          | May 17 to May 23, 2021 | 29  | 2-11  | 11.11-61.11  | 0-0 | 0.00-0.00  |
|          | May 24 to May 30, 2021 | 16  | 0-0   | 0.00-0.00    | 0-1 | 0.00-5.88  |
| Nagasaki |                        |     |       |              |     |            |
|          | Apr 5 to Apr 11, 2021  | 45  | 0-6   | 0.00-15.38   | 0-0 | 0.00-0.00  |
|          | Apr 12 to Apr 18, 2021 | 45  | 0-6   | 0.00-15.38   | 0-0 | 0.00-0.00  |
|          | Apr 19 to Apr 25, 2021 | 61  | 8-23  | 21.05-60.53  | 0-0 | 0.00-0.00  |
|          | Apr 26 to May 2, 2021  | 37  | 0-1   | 0.00-2.78    | 0-0 | 0.00-0.00  |
|          | May 3 to May 9, 2021   | 46  | 0-11  | 0.00-31.43   | 0-0 | 0.00-0.00  |
|          | May 10 to May 16, 2021 | 49  | 0-13  | 0.00-36.11   | 0-0 | 0.00-0.00  |
|          | May 17 to May 23, 2021 | 35  | 0-0   | 0.00-0.00    | 0-0 | 0.00-0.00  |
|          | May 24 to May 30, 2021 | 48  | 1-14  | 2.94-41.18   | 0-0 | 0.00-0.00  |
| Kumamoto |                        |     |       |              |     |            |
|          | Apr 5 to Apr 11, 2021  | 50  | 0-6   | 0.00-13.64   | 0-0 | 0.00-0.00  |
|          | Apr 12 to Apr 18, 2021 | 55  | 0-13  | 0.00-30.95   | 0-0 | 0.00-0.00  |
|          | Apr 19 to Apr 25, 2021 | 57  | 0-15  | 0.00-35.71   | 0-0 | 0.00-0.00  |
|          | Apr 26 to May 2, 2021  | 59  | 4-19  | 10.00-47.50  | 0-0 | 0.00-0.00  |
|          | May 3 to May 9, 2021   | 52  | 0-12  | 0.00-30.00   | 0-0 | 0.00-0.00  |
|          | May 10 to May 16, 2021 | 54  | 0-15  | 0.00-38.46   | 0-0 | 0.00-0.00  |
|          | May 17 to May 23, 2021 | 38  | 0-0   | 0.00-0.00    | 0-0 | 0.00-0.00  |
|          | May 24 to May 30, 2021 | 48  | 0-11  | 0.00-29.73   | 0-0 | 0.00-0.00  |
| Oita     |                        |     |       |              |     |            |
|          | Apr 5 to Apr 11, 2021  | 30  | 0-6   | 0.00-25.00   | 0-0 | 0.00-0.00  |
|          | Apr 12 to Apr 18, 2021 | 25  | 0-2   | 0.00-8.70    | 0-0 | 0.00-0.00  |
|          | Apr 19 to Apr 25, 2021 | 31  | 0-8   | 0.00-34.78   | 0-0 | 0.00-0.00  |
|          | Apr 26 to May 2, 2021  | 34  | 0-11  | 0.00-47.83   | 0-0 | 0.00-0.00  |
|          | May 3 to May 9, 2021   | 50  | 18-28 | 81.82-127.27 | 0-0 | 0.00-0.00  |
|          | May 10 to May 16, 2021 | 30  | 0-8   | 0.00-36.36   | 0-0 | 0.00-0.00  |
|          | May 17 to May 23, 2021 | 24  | 0-2   | 0.00-9.09    | 0-0 | 0.00-0.00  |
|          | May 24 to May 30, 2021 | 22  | 0-0   | 0.00-0.00    | 0-0 | 0.00-0.00  |
| Miyazaki |                        |     |       |              |     |            |
|          | Apr 5 to Apr 11, 2021  | 23  | 0-0   | 0.00-0.00    | 0-3 | 0.00-11.54 |
|          | Apr 12 to Apr 18, 2021 | 24  | 0-0   | 0.00-0.00    | 0-3 | 0.00-11.11 |
|          | Apr 19 to Apr 25, 2021 | 24  | 0-0   | 0.00-0.00    | 0-2 | 0.00-7.69  |
|          | Apr 26 to May 2, 2021  | 26  | 0-0   | 0.00-0.00    | 0-0 | 0.00-0.00  |

|           |                        |    |       |             |     |           |
|-----------|------------------------|----|-------|-------------|-----|-----------|
|           | May 3 to May 9, 2021   | 31 | 0-6   | 0.00-24.00  | 0-0 | 0.00-0.00 |
|           | May 10 to May 16, 2021 | 39 | 4-15  | 16.67-62.50 | 0-0 | 0.00-0.00 |
|           | May 17 to May 23, 2021 | 25 | 0-2   | 0.00-8.70   | 0-0 | 0.00-0.00 |
|           | May 24 to May 30, 2021 | 24 | 0-1   | 0.00-4.35   | 0-0 | 0.00-0.00 |
| Kagoshima |                        |    |       |             |     |           |
|           | Apr 5 to Apr 11, 2021  | 46 | 0-6   | 0.00-15.00  | 0-0 | 0.00-0.00 |
|           | Apr 12 to Apr 18, 2021 | 40 | 0-1   | 0.00-2.56   | 0-0 | 0.00-0.00 |
|           | Apr 19 to Apr 25, 2021 | 56 | 5-18  | 13.16-47.37 | 0-0 | 0.00-0.00 |
|           | Apr 26 to May 2, 2021  | 45 | 0-8   | 0.00-21.62  | 0-0 | 0.00-0.00 |
|           | May 3 to May 9, 2021   | 38 | 0-0   | 0.00-0.00   | 0-0 | 0.00-0.00 |
|           | May 10 to May 16, 2021 | 56 | 4-17  | 10.26-43.59 | 0-0 | 0.00-0.00 |
|           | May 17 to May 23, 2021 | 43 | 0-5   | 0.00-13.16  | 0-0 | 0.00-0.00 |
|           | May 24 to May 30, 2021 | 39 | 0-1   | 0.00-2.63   | 0-0 | 0.00-0.00 |
| Okinawa   |                        |    |       |             |     |           |
|           | Apr 5 to Apr 11, 2021  | 50 | 0-14  | 0.00-38.89  | 0-0 | 0.00-0.00 |
|           | Apr 12 to Apr 18, 2021 | 40 | 0-5   | 0.00-14.29  | 0-0 | 0.00-0.00 |
|           | Apr 19 to Apr 25, 2021 | 45 | 0-10  | 0.00-28.57  | 0-0 | 0.00-0.00 |
|           | Apr 26 to May 2, 2021  | 51 | 5-18  | 15.15-54.55 | 0-0 | 0.00-0.00 |
|           | May 3 to May 9, 2021   | 36 | 0-3   | 0.00-9.09   | 0-0 | 0.00-0.00 |
|           | May 10 to May 16, 2021 | 49 | 2-16  | 6.06-48.48  | 0-0 | 0.00-0.00 |
|           | May 17 to May 23, 2021 | 57 | 10-23 | 29.41-67.65 | 0-0 | 0.00-0.00 |
|           | May 24 to May 30, 2021 | 44 | 0-10  | 0.00-29.41  | 0-0 | 0.00-0.00 |

---

**Table A.5: Weekly number of observed and excess/exiguous deaths in Japan and 47 prefectures for respiratory disease-related deaths in all places from January 2020 through May 2021.**

| Prefecture | Week                   | Observed | Excess deaths | Percent excess | Exiguous deaths | Percent exiguous |
|------------|------------------------|----------|---------------|----------------|-----------------|------------------|
| Japan      |                        |          |               |                |                 |                  |
|            | Apr 5 to Apr 11, 2021  | 3207     | 0–0           | 0.00–0.00      | 0–78            | 0.00–2.37        |
|            | Apr 12 to Apr 18, 2021 | 3330     | 0–90          | 0.00–2.78      | 0–0             | 0.00–0.00        |
|            | Apr 19 to Apr 25, 2021 | 3441     | 0–254         | 0.00–7.97      | 0–0             | 0.00–0.00        |
|            | Apr 26 to May 2, 2021  | 3461     | 0–340         | 0.00–10.89     | 0–0             | 0.00–0.00        |
|            | May 3 to May 9, 2021   | 3528     | 92–474        | 3.01–15.52     | 0–0             | 0.00–0.00        |
|            | May 10 to May 16, 2021 | 3579     | 185–581       | 6.17–19.38     | 0–0             | 0.00–0.00        |
|            | May 17 to May 23, 2021 | 3366     | 66–452        | 2.26–15.51     | 0–0             | 0.00–0.00        |
|            | May 24 to May 30, 2021 | 3183     | 5–361         | 0.18–12.79     | 0–0             | 0.00–0.00        |
| Hokkaido   |                        |          |               |                |                 |                  |
|            | Apr 5 to Apr 11, 2021  | 138      | 0–3           | 0.00–2.22      | 0–0             | 0.00–0.00        |
|            | Apr 12 to Apr 18, 2021 | 126      | 0–0           | 0.00–0.00      | 0–8             | 0.00–5.97        |
|            | Apr 19 to Apr 25, 2021 | 125      | 0–0           | 0.00–0.00      | 0–8             | 0.00–6.02        |
|            | Apr 26 to May 2, 2021  | 156      | 0–23          | 0.00–17.29     | 0–0             | 0.00–0.00        |
|            | May 3 to May 9, 2021   | 150      | 0–18          | 0.00–13.64     | 0–0             | 0.00–0.00        |
|            | May 10 to May 16, 2021 | 166      | 6–36          | 4.62–27.69     | 0–0             | 0.00–0.00        |
|            | May 17 to May 23, 2021 | 137      | 0–8           | 0.00–6.20      | 0–0             | 0.00–0.00        |
|            | May 24 to May 30, 2021 | 144      | 0–17          | 0.00–13.39     | 0–0             | 0.00–0.00        |
| Aomori     |                        |          |               |                |                 |                  |
|            | Apr 5 to Apr 11, 2021  | 35       | 0–0           | 0.00–0.00      | 0–4             | 0.00–10.26       |
|            | Apr 12 to Apr 18, 2021 | 41       | 0–2           | 0.00–5.13      | 0–0             | 0.00–0.00        |
|            | Apr 19 to Apr 25, 2021 | 39       | 0–0           | 0.00–0.00      | 0–0             | 0.00–0.00        |
|            | Apr 26 to May 2, 2021  | 38       | 0–0           | 0.00–0.00      | 0–0             | 0.00–0.00        |
|            | May 3 to May 9, 2021   | 44       | 0–8           | 0.00–22.22     | 0–0             | 0.00–0.00        |
|            | May 10 to May 16, 2021 | 59       | 11–24         | 31.43–68.57    | 0–0             | 0.00–0.00        |
|            | May 17 to May 23, 2021 | 45       | 0–10          | 0.00–28.57     | 0–0             | 0.00–0.00        |
|            | May 24 to May 30, 2021 | 38       | 0–2           | 0.00–5.56      | 0–0             | 0.00–0.00        |
| Iwate      |                        |          |               |                |                 |                  |
|            | Apr 5 to Apr 11, 2021  | 29       | 0–0           | 0.00–0.00      | 0–9             | 0.00–23.68       |
|            | Apr 12 to Apr 18, 2021 | 45       | 0–7           | 0.00–18.42     | 0–0             | 0.00–0.00        |
|            | Apr 19 to Apr 25, 2021 | 28       | 0–0           | 0.00–0.00      | 0–10            | 0.00–26.32       |
|            | Apr 26 to May 2, 2021  | 31       | 0–0           | 0.00–0.00      | 0–6             | 0.00–16.22       |
|            | May 3 to May 9, 2021   | 35       | 0–0           | 0.00–0.00      | 0–1             | 0.00–2.78        |
|            | May 10 to May 16, 2021 | 22       | 0–0           | 0.00–0.00      | 1–13            | 2.86–37.14       |
|            | May 17 to May 23, 2021 | 45       | 0–11          | 0.00–32.35     | 0–0             | 0.00–0.00        |
|            | May 24 to May 30, 2021 | 34       | 0–2           | 0.00–6.25      | 0–0             | 0.00–0.00        |
| Miyagi     |                        |          |               |                |                 |                  |
|            | Apr 5 to Apr 11, 2021  | 58       | 0–10          | 0.00–20.83     | 0–0             | 0.00–0.00        |
|            | Apr 12 to Apr 18, 2021 | 62       | 1–15          | 2.13–31.91     | 0–0             | 0.00–0.00        |
|            | Apr 19 to Apr 25, 2021 | 47       | 0–1           | 0.00–2.17      | 0–0             | 0.00–0.00        |
|            | Apr 26 to May 2, 2021  | 37       | 0–0           | 0.00–0.00      | 0–9             | 0.00–19.57       |
|            | May 3 to May 9, 2021   | 62       | 3–17          | 6.67–37.78     | 0–0             | 0.00–0.00        |

|           |                        |    |      |             |     |            |
|-----------|------------------------|----|------|-------------|-----|------------|
|           | May 10 to May 16, 2021 | 44 | 0-0  | 0.00-0.00   | 0-1 | 0.00-2.22  |
|           | May 17 to May 23, 2021 | 58 | 1-14 | 2.27-31.82  | 0-0 | 0.00-0.00  |
|           | May 24 to May 30, 2021 | 45 | 0-1  | 0.00-2.27   | 0-0 | 0.00-0.00  |
| Akita     |                        |    |      |             |     |            |
|           | Apr 5 to Apr 11, 2021  | 32 | 0-0  | 0.00-0.00   | 0-2 | 0.00-5.88  |
|           | Apr 12 to Apr 18, 2021 | 26 | 0-0  | 0.00-0.00   | 0-8 | 0.00-23.53 |
|           | Apr 19 to Apr 25, 2021 | 35 | 0-0  | 0.00-0.00   | 0-0 | 0.00-0.00  |
|           | Apr 26 to May 2, 2021  | 53 | 8-20 | 24.24-60.61 | 0-0 | 0.00-0.00  |
|           | May 3 to May 9, 2021   | 34 | 0-1  | 0.00-3.03   | 0-0 | 0.00-0.00  |
|           | May 10 to May 16, 2021 | 28 | 0-0  | 0.00-0.00   | 0-4 | 0.00-12.50 |
|           | May 17 to May 23, 2021 | 36 | 0-5  | 0.00-16.13  | 0-0 | 0.00-0.00  |
|           | May 24 to May 30, 2021 | 27 | 0-0  | 0.00-0.00   | 0-3 | 0.00-10.00 |
| Yamagata  |                        |    |      |             |     |            |
|           | Apr 5 to Apr 11, 2021  | 26 | 0-0  | 0.00-0.00   | 0-6 | 0.00-18.75 |
|           | Apr 12 to Apr 18, 2021 | 28 | 0-0  | 0.00-0.00   | 0-5 | 0.00-15.15 |
|           | Apr 19 to Apr 25, 2021 | 37 | 0-5  | 0.00-15.63  | 0-0 | 0.00-0.00  |
|           | Apr 26 to May 2, 2021  | 22 | 0-0  | 0.00-0.00   | 0-9 | 0.00-29.03 |
|           | May 3 to May 9, 2021   | 31 | 0-1  | 0.00-3.33   | 0-0 | 0.00-0.00  |
|           | May 10 to May 16, 2021 | 36 | 0-7  | 0.00-24.14  | 0-0 | 0.00-0.00  |
|           | May 17 to May 23, 2021 | 38 | 0-10 | 0.00-35.71  | 0-0 | 0.00-0.00  |
|           | May 24 to May 30, 2021 | 30 | 0-3  | 0.00-11.11  | 0-0 | 0.00-0.00  |
| Fukushima |                        |    |      |             |     |            |
|           | Apr 5 to Apr 11, 2021  | 48 | 0-0  | 0.00-0.00   | 0-3 | 0.00-5.88  |
|           | Apr 12 to Apr 18, 2021 | 44 | 0-0  | 0.00-0.00   | 0-7 | 0.00-13.73 |
|           | Apr 19 to Apr 25, 2021 | 53 | 0-2  | 0.00-3.92   | 0-0 | 0.00-0.00  |
|           | Apr 26 to May 2, 2021  | 61 | 0-11 | 0.00-22.00  | 0-0 | 0.00-0.00  |
|           | May 3 to May 9, 2021   | 65 | 1-17 | 2.08-35.42  | 0-0 | 0.00-0.00  |
|           | May 10 to May 16, 2021 | 59 | 0-11 | 0.00-22.92  | 0-0 | 0.00-0.00  |
|           | May 17 to May 23, 2021 | 59 | 0-11 | 0.00-22.92  | 0-0 | 0.00-0.00  |
|           | May 24 to May 30, 2021 | 52 | 0-6  | 0.00-13.04  | 0-0 | 0.00-0.00  |
| Ibaraki   |                        |    |      |             |     |            |
|           | Apr 5 to Apr 11, 2021  | 72 | 0-0  | 0.00-0.00   | 0-9 | 0.00-11.11 |
|           | Apr 12 to Apr 18, 2021 | 94 | 0-13 | 0.00-16.05  | 0-0 | 0.00-0.00  |
|           | Apr 19 to Apr 25, 2021 | 83 | 0-3  | 0.00-3.75   | 0-0 | 0.00-0.00  |
|           | Apr 26 to May 2, 2021  | 74 | 0-0  | 0.00-0.00   | 0-3 | 0.00-3.90  |
|           | May 3 to May 9, 2021   | 82 | 0-7  | 0.00-9.33   | 0-0 | 0.00-0.00  |
|           | May 10 to May 16, 2021 | 82 | 0-8  | 0.00-10.81  | 0-0 | 0.00-0.00  |
|           | May 17 to May 23, 2021 | 73 | 0-2  | 0.00-2.82   | 0-0 | 0.00-0.00  |
|           | May 24 to May 30, 2021 | 74 | 0-4  | 0.00-5.71   | 0-0 | 0.00-0.00  |
| Tochigi   |                        |    |      |             |     |            |
|           | Apr 5 to Apr 11, 2021  | 43 | 0-0  | 0.00-0.00   | 0-5 | 0.00-10.42 |
|           | Apr 12 to Apr 18, 2021 | 50 | 0-3  | 0.00-6.38   | 0-0 | 0.00-0.00  |
|           | Apr 19 to Apr 25, 2021 | 53 | 0-7  | 0.00-15.22  | 0-0 | 0.00-0.00  |
|           | Apr 26 to May 2, 2021  | 59 | 0-15 | 0.00-34.09  | 0-0 | 0.00-0.00  |
|           | May 3 to May 9, 2021   | 53 | 0-10 | 0.00-23.26  | 0-0 | 0.00-0.00  |
|           | May 10 to May 16, 2021 | 51 | 0-9  | 0.00-21.43  | 0-0 | 0.00-0.00  |

|          |                        |     |       |             |      |           |
|----------|------------------------|-----|-------|-------------|------|-----------|
|          | May 17 to May 23, 2021 | 43  | 0-2   | 0.00-4.88   | 0-0  | 0.00-0.00 |
|          | May 24 to May 30, 2021 | 39  | 0-0   | 0.00-0.00   | 0-1  | 0.00-2.50 |
| Gunma    |                        |     |       |             |      |           |
|          | Apr 5 to Apr 11, 2021  | 63  | 0-4   | 0.00-6.78   | 0-0  | 0.00-0.00 |
|          | Apr 12 to Apr 18, 2021 | 76  | 0-17  | 0.00-28.81  | 0-0  | 0.00-0.00 |
|          | Apr 19 to Apr 25, 2021 | 53  | 0-0   | 0.00-0.00   | 0-5  | 0.00-8.62 |
|          | Apr 26 to May 2, 2021  | 61  | 0-3   | 0.00-5.17   | 0-0  | 0.00-0.00 |
|          | May 3 to May 9, 2021   | 60  | 0-2   | 0.00-3.45   | 0-0  | 0.00-0.00 |
|          | May 10 to May 16, 2021 | 80  | 8-24  | 14.29-42.86 | 0-0  | 0.00-0.00 |
|          | May 17 to May 23, 2021 | 50  | 0-0   | 0.00-0.00   | 0-3  | 0.00-5.66 |
|          | May 24 to May 30, 2021 | 64  | 0-13  | 0.00-25.49  | 0-0  | 0.00-0.00 |
| Saitama  |                        |     |       |             |      |           |
|          | Apr 5 to Apr 11, 2021  | 171 | 0-0   | 0.00-0.00   | 0-4  | 0.00-2.29 |
|          | Apr 12 to Apr 18, 2021 | 177 | 0-7   | 0.00-4.12   | 0-0  | 0.00-0.00 |
|          | Apr 19 to Apr 25, 2021 | 200 | 3-35  | 1.82-21.21  | 0-0  | 0.00-0.00 |
|          | Apr 26 to May 2, 2021  | 198 | 5-35  | 3.07-21.47  | 0-0  | 0.00-0.00 |
|          | May 3 to May 9, 2021   | 201 | 14-43 | 8.86-27.22  | 0-0  | 0.00-0.00 |
|          | May 10 to May 16, 2021 | 181 | 0-27  | 0.00-17.53  | 0-0  | 0.00-0.00 |
|          | May 17 to May 23, 2021 | 186 | 5-36  | 3.33-24.00  | 0-0  | 0.00-0.00 |
|          | May 24 to May 30, 2021 | 166 | 0-20  | 0.00-13.70  | 0-0  | 0.00-0.00 |
| Chiba    |                        |     |       |             |      |           |
|          | Apr 5 to Apr 11, 2021  | 159 | 0-11  | 0.00-7.43   | 0-0  | 0.00-0.00 |
|          | Apr 12 to Apr 18, 2021 | 138 | 0-0   | 0.00-0.00   | 0-7  | 0.00-4.83 |
|          | Apr 19 to Apr 25, 2021 | 138 | 0-0   | 0.00-0.00   | 0-7  | 0.00-4.83 |
|          | Apr 26 to May 2, 2021  | 157 | 0-17  | 0.00-12.14  | 0-0  | 0.00-0.00 |
|          | May 3 to May 9, 2021   | 154 | 0-17  | 0.00-12.41  | 0-0  | 0.00-0.00 |
|          | May 10 to May 16, 2021 | 147 | 0-11  | 0.00-8.09   | 0-0  | 0.00-0.00 |
|          | May 17 to May 23, 2021 | 137 | 0-4   | 0.00-3.01   | 0-0  | 0.00-0.00 |
|          | May 24 to May 30, 2021 | 138 | 0-7   | 0.00-5.34   | 0-0  | 0.00-0.00 |
| Tokyo    |                        |     |       |             |      |           |
|          | Apr 5 to Apr 11, 2021  | 252 | 0-0   | 0.00-0.00   | 0-13 | 0.00-4.91 |
|          | Apr 12 to Apr 18, 2021 | 300 | 0-41  | 0.00-15.83  | 0-0  | 0.00-0.00 |
|          | Apr 19 to Apr 25, 2021 | 295 | 0-40  | 0.00-15.69  | 0-0  | 0.00-0.00 |
|          | Apr 26 to May 2, 2021  | 285 | 0-34  | 0.00-13.55  | 0-0  | 0.00-0.00 |
|          | May 3 to May 9, 2021   | 298 | 10-53 | 4.08-21.63  | 0-0  | 0.00-0.00 |
|          | May 10 to May 16, 2021 | 266 | 0-25  | 0.00-10.37  | 0-0  | 0.00-0.00 |
|          | May 17 to May 23, 2021 | 263 | 0-29  | 0.00-12.39  | 0-0  | 0.00-0.00 |
|          | May 24 to May 30, 2021 | 274 | 0-43  | 0.00-18.61  | 0-0  | 0.00-0.00 |
| Kanagawa |                        |     |       |             |      |           |
|          | Apr 5 to Apr 11, 2021  | 185 | 0-0   | 0.00-0.00   | 0-7  | 0.00-3.65 |
|          | Apr 12 to Apr 18, 2021 | 199 | 0-10  | 0.00-5.29   | 0-0  | 0.00-0.00 |
|          | Apr 19 to Apr 25, 2021 | 208 | 0-23  | 0.00-12.43  | 0-0  | 0.00-0.00 |
|          | Apr 26 to May 2, 2021  | 206 | 0-26  | 0.00-14.44  | 0-0  | 0.00-0.00 |
|          | May 3 to May 9, 2021   | 190 | 0-15  | 0.00-8.57   | 0-0  | 0.00-0.00 |
|          | May 10 to May 16, 2021 | 187 | 0-14  | 0.00-8.09   | 0-0  | 0.00-0.00 |
|          | May 17 to May 23, 2021 | 208 | 7-41  | 4.19-24.55  | 0-0  | 0.00-0.00 |

|                        |                        |     |           |             |           |            |
|------------------------|------------------------|-----|-----------|-------------|-----------|------------|
| Niigata                | May 24 to May 30, 2021 | 168 | 0-5       | 0.00-3.07   | 0-0       | 0.00-0.00  |
|                        | Apr 5 to Apr 11, 2021  | 66  | 0-6       | 0.00-10.00  | 0-0       | 0.00-0.00  |
|                        | Apr 12 to Apr 18, 2021 | 55  | 0-0       | 0.00-0.00   | 0-5       | 0.00-8.33  |
|                        | Apr 19 to Apr 25, 2021 | 58  | 0-0       | 0.00-0.00   | 0-1       | 0.00-1.69  |
|                        | Apr 26 to May 2, 2021  | 55  | 0-0       | 0.00-0.00   | 0-3       | 0.00-5.17  |
|                        | May 3 to May 9, 2021   | 53  | 0-0       | 0.00-0.00   | 0-4       | 0.00-7.02  |
|                        | May 10 to May 16, 2021 | 66  | 0-10      | 0.00-17.86  | 0-0       | 0.00-0.00  |
|                        | May 17 to May 23, 2021 | 53  | 0-0       | 0.00-0.00   | 0-1       | 0.00-1.85  |
| May 24 to May 30, 2021 | 50                     | 0-0 | 0.00-0.00 | 0-2         | 0.00-3.85 |            |
| Toyama                 | Apr 5 to Apr 11, 2021  | 34  | 0-4       | 0.00-13.33  | 0-0       | 0.00-0.00  |
|                        | Apr 12 to Apr 18, 2021 | 29  | 0-0       | 0.00-0.00   | 0-1       | 0.00-3.33  |
|                        | Apr 19 to Apr 25, 2021 | 36  | 0-6       | 0.00-20.00  | 0-0       | 0.00-0.00  |
|                        | Apr 26 to May 2, 2021  | 30  | 0-1       | 0.00-3.45   | 0-0       | 0.00-0.00  |
|                        | May 3 to May 9, 2021   | 34  | 0-6       | 0.00-21.43  | 0-0       | 0.00-0.00  |
|                        | May 10 to May 16, 2021 | 29  | 0-1       | 0.00-3.57   | 0-0       | 0.00-0.00  |
|                        | May 17 to May 23, 2021 | 26  | 0-0       | 0.00-0.00   | 0-2       | 0.00-7.14  |
|                        | May 24 to May 30, 2021 | 27  | 0-0       | 0.00-0.00   | 0-0       | 0.00-0.00  |
| Ishikawa               | Apr 5 to Apr 11, 2021  | 25  | 0-0       | 0.00-0.00   | 0-4       | 0.00-13.79 |
|                        | Apr 12 to Apr 18, 2021 | 37  | 0-8       | 0.00-27.59  | 0-0       | 0.00-0.00  |
|                        | Apr 19 to Apr 25, 2021 | 26  | 0-0       | 0.00-0.00   | 0-3       | 0.00-10.34 |
|                        | Apr 26 to May 2, 2021  | 32  | 0-3       | 0.00-10.34  | 0-0       | 0.00-0.00  |
|                        | May 3 to May 9, 2021   | 37  | 0-9       | 0.00-32.14  | 0-0       | 0.00-0.00  |
|                        | May 10 to May 16, 2021 | 29  | 0-2       | 0.00-7.41   | 0-0       | 0.00-0.00  |
|                        | May 17 to May 23, 2021 | 19  | 0-0       | 0.00-0.00   | 0-8       | 0.00-29.63 |
|                        | May 24 to May 30, 2021 | 35  | 0-9       | 0.00-34.62  | 0-0       | 0.00-0.00  |
| Fukui                  | Apr 5 to Apr 11, 2021  | 33  | 0-8       | 0.00-32.00  | 0-0       | 0.00-0.00  |
|                        | Apr 12 to Apr 18, 2021 | 21  | 0-0       | 0.00-0.00   | 0-4       | 0.00-16.00 |
|                        | Apr 19 to Apr 25, 2021 | 21  | 0-0       | 0.00-0.00   | 0-3       | 0.00-12.50 |
|                        | Apr 26 to May 2, 2021  | 31  | 0-8       | 0.00-34.78  | 0-0       | 0.00-0.00  |
|                        | May 3 to May 9, 2021   | 30  | 0-7       | 0.00-30.43  | 0-0       | 0.00-0.00  |
|                        | May 10 to May 16, 2021 | 32  | 0-9       | 0.00-39.13  | 0-0       | 0.00-0.00  |
|                        | May 17 to May 23, 2021 | 31  | 0-9       | 0.00-40.91  | 0-0       | 0.00-0.00  |
|                        | May 24 to May 30, 2021 | 30  | 0-9       | 0.00-42.86  | 0-0       | 0.00-0.00  |
| Yamanashi              | Apr 5 to Apr 11, 2021  | 17  | 0-0       | 0.00-0.00   | 0-6       | 0.00-26.09 |
|                        | Apr 12 to Apr 18, 2021 | 18  | 0-0       | 0.00-0.00   | 0-5       | 0.00-21.74 |
|                        | Apr 19 to Apr 25, 2021 | 31  | 0-9       | 0.00-40.91  | 0-0       | 0.00-0.00  |
|                        | Apr 26 to May 2, 2021  | 24  | 0-2       | 0.00-9.09   | 0-0       | 0.00-0.00  |
|                        | May 3 to May 9, 2021   | 33  | 3-12      | 14.29-57.14 | 0-0       | 0.00-0.00  |
|                        | May 10 to May 16, 2021 | 23  | 0-2       | 0.00-9.52   | 0-0       | 0.00-0.00  |
|                        | May 17 to May 23, 2021 | 32  | 1-11      | 4.76-52.38  | 0-0       | 0.00-0.00  |
|                        | May 24 to May 30, 2021 | 21  | 0-1       | 0.00-5.00   | 0-0       | 0.00-0.00  |



Nagano

|                        |    |      |            |     |           |
|------------------------|----|------|------------|-----|-----------|
| Apr 5 to Apr 11, 2021  | 60 | 0-5  | 0.00-9.09  | 0-0 | 0.00-0.00 |
| Apr 12 to Apr 18, 2021 | 55 | 0-2  | 0.00-3.77  | 0-0 | 0.00-0.00 |
| Apr 19 to Apr 25, 2021 | 47 | 0-0  | 0.00-0.00  | 0-5 | 0.00-9.62 |
| Apr 26 to May 2, 2021  | 65 | 0-14 | 0.00-27.45 | 0-0 | 0.00-0.00 |
| May 3 to May 9, 2021   | 58 | 0-9  | 0.00-18.37 | 0-0 | 0.00-0.00 |
| May 10 to May 16, 2021 | 61 | 0-12 | 0.00-24.49 | 0-0 | 0.00-0.00 |
| May 17 to May 23, 2021 | 60 | 0-12 | 0.00-25.00 | 0-0 | 0.00-0.00 |
| May 24 to May 30, 2021 | 60 | 0-14 | 0.00-30.43 | 0-0 | 0.00-0.00 |

Gifu

|                        |    |       |             |      |            |
|------------------------|----|-------|-------------|------|------------|
| Apr 5 to Apr 11, 2021  | 49 | 0-0   | 0.00-0.00   | 0-10 | 0.00-16.95 |
| Apr 12 to Apr 18, 2021 | 61 | 0-4   | 0.00-7.02   | 0-0  | 0.00-0.00  |
| Apr 19 to Apr 25, 2021 | 54 | 0-0   | 0.00-0.00   | 0-2  | 0.00-3.57  |
| Apr 26 to May 2, 2021  | 51 | 0-0   | 0.00-0.00   | 0-3  | 0.00-5.56  |
| May 3 to May 9, 2021   | 71 | 4-19  | 7.69-36.54  | 0-0  | 0.00-0.00  |
| May 10 to May 16, 2021 | 77 | 11-26 | 21.57-50.98 | 0-0  | 0.00-0.00  |
| May 17 to May 23, 2021 | 63 | 0-13  | 0.00-26.00  | 0-0  | 0.00-0.00  |
| May 24 to May 30, 2021 | 51 | 0-2   | 0.00-4.08   | 0-0  | 0.00-0.00  |

Shizuoka

|                        |     |      |            |      |            |
|------------------------|-----|------|------------|------|------------|
| Apr 5 to Apr 11, 2021  | 81  | 0-0  | 0.00-0.00  | 0-12 | 0.00-12.90 |
| Apr 12 to Apr 18, 2021 | 80  | 0-0  | 0.00-0.00  | 0-13 | 0.00-13.98 |
| Apr 19 to Apr 25, 2021 | 100 | 0-9  | 0.00-9.89  | 0-0  | 0.00-0.00  |
| Apr 26 to May 2, 2021  | 102 | 0-16 | 0.00-18.60 | 0-0  | 0.00-0.00  |
| May 3 to May 9, 2021   | 87  | 0-4  | 0.00-4.82  | 0-0  | 0.00-0.00  |
| May 10 to May 16, 2021 | 85  | 0-5  | 0.00-6.25  | 0-0  | 0.00-0.00  |
| May 17 to May 23, 2021 | 102 | 3-24 | 3.85-30.77 | 0-0  | 0.00-0.00  |
| May 24 to May 30, 2021 | 86  | 0-11 | 0.00-14.67 | 0-0  | 0.00-0.00  |

Aichi

|                        |     |      |            |      |            |
|------------------------|-----|------|------------|------|------------|
| Apr 5 to Apr 11, 2021  | 146 | 0-0  | 0.00-0.00  | 0-25 | 0.00-14.62 |
| Apr 12 to Apr 18, 2021 | 174 | 0-6  | 0.00-3.57  | 0-0  | 0.00-0.00  |
| Apr 19 to Apr 25, 2021 | 178 | 0-13 | 0.00-7.88  | 0-0  | 0.00-0.00  |
| Apr 26 to May 2, 2021  | 194 | 0-31 | 0.00-19.02 | 0-0  | 0.00-0.00  |
| May 3 to May 9, 2021   | 175 | 0-16 | 0.00-10.06 | 0-0  | 0.00-0.00  |
| May 10 to May 16, 2021 | 191 | 5-37 | 3.25-24.03 | 0-0  | 0.00-0.00  |
| May 17 to May 23, 2021 | 164 | 0-13 | 0.00-8.61  | 0-0  | 0.00-0.00  |
| May 24 to May 30, 2021 | 168 | 0-22 | 0.00-15.07 | 0-0  | 0.00-0.00  |

Mie

|                        |    |      |            |     |           |
|------------------------|----|------|------------|-----|-----------|
| Apr 5 to Apr 11, 2021  | 54 | 0-7  | 0.00-14.89 | 0-0 | 0.00-0.00 |
| Apr 12 to Apr 18, 2021 | 48 | 0-1  | 0.00-2.13  | 0-0 | 0.00-0.00 |
| Apr 19 to Apr 25, 2021 | 53 | 0-6  | 0.00-12.77 | 0-0 | 0.00-0.00 |
| Apr 26 to May 2, 2021  | 52 | 0-6  | 0.00-13.04 | 0-0 | 0.00-0.00 |
| May 3 to May 9, 2021   | 61 | 3-18 | 6.98-41.86 | 0-0 | 0.00-0.00 |
| May 10 to May 16, 2021 | 53 | 0-10 | 0.00-23.26 | 0-0 | 0.00-0.00 |
| May 17 to May 23, 2021 | 55 | 0-13 | 0.00-30.95 | 0-0 | 0.00-0.00 |
| May 24 to May 30, 2021 | 49 | 0-7  | 0.00-16.67 | 0-0 | 0.00-0.00 |

Shiga

|          |                        |     |       |             |      |            |
|----------|------------------------|-----|-------|-------------|------|------------|
|          | Apr 5 to Apr 11, 2021  | 39  | 0-9   | 0.00-30.00  | 0-0  | 0.00-0.00  |
|          | Apr 12 to Apr 18, 2021 | 30  | 0-0   | 0.00-0.00   | 0-0  | 0.00-0.00  |
|          | Apr 19 to Apr 25, 2021 | 27  | 0-0   | 0.00-0.00   | 0-2  | 0.00-6.90  |
|          | Apr 26 to May 2, 2021  | 34  | 0-5   | 0.00-17.24  | 0-0  | 0.00-0.00  |
|          | May 3 to May 9, 2021   | 43  | 4-15  | 14.29-53.57 | 0-0  | 0.00-0.00  |
|          | May 10 to May 16, 2021 | 32  | 0-5   | 0.00-18.52  | 0-0  | 0.00-0.00  |
|          | May 17 to May 23, 2021 | 34  | 0-8   | 0.00-30.77  | 0-0  | 0.00-0.00  |
|          | May 24 to May 30, 2021 | 25  | 0-0   | 0.00-0.00   | 0-1  | 0.00-3.85  |
| Kyoto    |                        |     |       |             |      |            |
|          | Apr 5 to Apr 11, 2021  | 61  | 0-0   | 0.00-0.00   | 0-5  | 0.00-7.58  |
|          | Apr 12 to Apr 18, 2021 | 50  | 0-0   | 0.00-0.00   | 0-15 | 0.00-23.08 |
|          | Apr 19 to Apr 25, 2021 | 48  | 0-0   | 0.00-0.00   | 0-16 | 0.00-25.00 |
|          | Apr 26 to May 2, 2021  | 66  | 0-3   | 0.00-4.76   | 0-0  | 0.00-0.00  |
|          | May 3 to May 9, 2021   | 77  | 0-16  | 0.00-26.23  | 0-0  | 0.00-0.00  |
|          | May 10 to May 16, 2021 | 66  | 0-7   | 0.00-11.86  | 0-0  | 0.00-0.00  |
|          | May 17 to May 23, 2021 | 47  | 0-0   | 0.00-0.00   | 0-10 | 0.00-17.54 |
|          | May 24 to May 30, 2021 | 60  | 0-4   | 0.00-7.14   | 0-0  | 0.00-0.00  |
| Osaka    |                        |     |       |             |      |            |
|          | Apr 5 to Apr 11, 2021  | 267 | 0-4   | 0.00-1.52   | 0-0  | 0.00-0.00  |
|          | Apr 12 to Apr 18, 2021 | 249 | 0-0   | 0.00-0.00   | 0-12 | 0.00-4.60  |
|          | Apr 19 to Apr 25, 2021 | 275 | 0-21  | 0.00-8.27   | 0-0  | 0.00-0.00  |
|          | Apr 26 to May 2, 2021  | 245 | 0-0   | 0.00-0.00   | 0-4  | 0.00-1.61  |
|          | May 3 to May 9, 2021   | 282 | 0-37  | 0.00-15.10  | 0-0  | 0.00-0.00  |
|          | May 10 to May 16, 2021 | 302 | 16-59 | 6.58-24.28  | 0-0  | 0.00-0.00  |
|          | May 17 to May 23, 2021 | 250 | 0-9   | 0.00-3.73   | 0-0  | 0.00-0.00  |
|          | May 24 to May 30, 2021 | 276 | 0-41  | 0.00-17.45  | 0-0  | 0.00-0.00  |
| Hyogo    |                        |     |       |             |      |            |
|          | Apr 5 to Apr 11, 2021  | 134 | 0-0   | 0.00-0.00   | 0-8  | 0.00-5.63  |
|          | Apr 12 to Apr 18, 2021 | 134 | 0-0   | 0.00-0.00   | 0-6  | 0.00-4.29  |
|          | Apr 19 to Apr 25, 2021 | 136 | 0-0   | 0.00-0.00   | 0-1  | 0.00-0.73  |
|          | Apr 26 to May 2, 2021  | 140 | 0-7   | 0.00-5.26   | 0-0  | 0.00-0.00  |
|          | May 3 to May 9, 2021   | 137 | 0-8   | 0.00-6.20   | 0-0  | 0.00-0.00  |
|          | May 10 to May 16, 2021 | 164 | 9-37  | 7.09-29.13  | 0-0  | 0.00-0.00  |
|          | May 17 to May 23, 2021 | 162 | 8-36  | 6.35-28.57  | 0-0  | 0.00-0.00  |
|          | May 24 to May 30, 2021 | 121 | 0-0   | 0.00-0.00   | 0-1  | 0.00-0.82  |
| Nara     |                        |     |       |             |      |            |
|          | Apr 5 to Apr 11, 2021  | 36  | 0-0   | 0.00-0.00   | 0-5  | 0.00-12.20 |
|          | Apr 12 to Apr 18, 2021 | 43  | 0-3   | 0.00-7.50   | 0-0  | 0.00-0.00  |
|          | Apr 19 to Apr 25, 2021 | 45  | 0-5   | 0.00-12.50  | 0-0  | 0.00-0.00  |
|          | Apr 26 to May 2, 2021  | 41  | 0-2   | 0.00-5.13   | 0-0  | 0.00-0.00  |
|          | May 3 to May 9, 2021   | 37  | 0-0   | 0.00-0.00   | 0-1  | 0.00-2.63  |
|          | May 10 to May 16, 2021 | 44  | 0-7   | 0.00-18.92  | 0-0  | 0.00-0.00  |
|          | May 17 to May 23, 2021 | 42  | 0-7   | 0.00-20.00  | 0-0  | 0.00-0.00  |
|          | May 24 to May 30, 2021 | 34  | 0-0   | 0.00-0.00   | 0-0  | 0.00-0.00  |
| Wakayama |                        |     |       |             |      |            |
|          | Apr 5 to Apr 11, 2021  | 34  | 0-0   | 0.00-0.00   | 0-1  | 0.00-2.86  |

|           |                        |     |       |             |      |            |
|-----------|------------------------|-----|-------|-------------|------|------------|
|           | Apr 12 to Apr 18, 2021 | 39  | 0-4   | 0.00-11.43  | 0-0  | 0.00-0.00  |
|           | Apr 19 to Apr 25, 2021 | 37  | 0-3   | 0.00-8.82   | 0-0  | 0.00-0.00  |
|           | Apr 26 to May 2, 2021  | 25  | 0-0   | 0.00-0.00   | 0-9  | 0.00-26.47 |
|           | May 3 to May 9, 2021   | 26  | 0-0   | 0.00-0.00   | 0-7  | 0.00-21.21 |
|           | May 10 to May 16, 2021 | 20  | 0-0   | 0.00-0.00   | 1-12 | 3.13-37.50 |
|           | May 17 to May 23, 2021 | 28  | 0-0   | 0.00-0.00   | 0-3  | 0.00-9.68  |
|           | May 24 to May 30, 2021 | 29  | 0-0   | 0.00-0.00   | 0-1  | 0.00-3.33  |
| Tottori   |                        |     |       |             |      |            |
|           | Apr 5 to Apr 11, 2021  | 13  | 0-0   | 0.00-0.00   | 0-4  | 0.00-23.53 |
|           | Apr 12 to Apr 18, 2021 | 12  | 0-0   | 0.00-0.00   | 0-4  | 0.00-25.00 |
|           | Apr 19 to Apr 25, 2021 | 15  | 0-0   | 0.00-0.00   | 0-1  | 0.00-6.25  |
|           | Apr 26 to May 2, 2021  | 10  | 0-0   | 0.00-0.00   | 0-5  | 0.00-33.33 |
|           | May 3 to May 9, 2021   | 18  | 0-3   | 0.00-20.00  | 0-0  | 0.00-0.00  |
|           | May 10 to May 16, 2021 | 23  | 1-9   | 7.14-64.29  | 0-0  | 0.00-0.00  |
|           | May 17 to May 23, 2021 | 15  | 0-1   | 0.00-7.14   | 0-0  | 0.00-0.00  |
|           | May 24 to May 30, 2021 | 14  | 0-0   | 0.00-0.00   | 0-0  | 0.00-0.00  |
| Shimane   |                        |     |       |             |      |            |
|           | Apr 5 to Apr 11, 2021  | 21  | 0-0   | 0.00-0.00   | 0-1  | 0.00-4.55  |
|           | Apr 12 to Apr 18, 2021 | 30  | 0-8   | 0.00-36.36  | 0-0  | 0.00-0.00  |
|           | Apr 19 to Apr 25, 2021 | 19  | 0-0   | 0.00-0.00   | 0-2  | 0.00-9.52  |
|           | Apr 26 to May 2, 2021  | 28  | 0-8   | 0.00-40.00  | 0-0  | 0.00-0.00  |
|           | May 3 to May 9, 2021   | 26  | 0-7   | 0.00-36.84  | 0-0  | 0.00-0.00  |
|           | May 10 to May 16, 2021 | 25  | 0-6   | 0.00-31.58  | 0-0  | 0.00-0.00  |
|           | May 17 to May 23, 2021 | 31  | 3-12  | 15.79-63.16 | 0-0  | 0.00-0.00  |
|           | May 24 to May 30, 2021 | 20  | 0-2   | 0.00-11.11  | 0-0  | 0.00-0.00  |
| Okayama   |                        |     |       |             |      |            |
|           | Apr 5 to Apr 11, 2021  | 45  | 0-0   | 0.00-0.00   | 0-16 | 0.00-26.23 |
|           | Apr 12 to Apr 18, 2021 | 56  | 0-0   | 0.00-0.00   | 0-4  | 0.00-6.67  |
|           | Apr 19 to Apr 25, 2021 | 65  | 0-5   | 0.00-8.33   | 0-0  | 0.00-0.00  |
|           | Apr 26 to May 2, 2021  | 59  | 0-0   | 0.00-0.00   | 0-1  | 0.00-1.67  |
|           | May 3 to May 9, 2021   | 62  | 0-5   | 0.00-8.77   | 0-0  | 0.00-0.00  |
|           | May 10 to May 16, 2021 | 74  | 1-18  | 1.79-32.14  | 0-0  | 0.00-0.00  |
|           | May 17 to May 23, 2021 | 45  | 0-0   | 0.00-0.00   | 0-10 | 0.00-18.18 |
|           | May 24 to May 30, 2021 | 56  | 0-3   | 0.00-5.66   | 0-0  | 0.00-0.00  |
| Hiroshima |                        |     |       |             |      |            |
|           | Apr 5 to Apr 11, 2021  | 72  | 0-0   | 0.00-0.00   | 0-4  | 0.00-5.26  |
|           | Apr 12 to Apr 18, 2021 | 78  | 0-5   | 0.00-6.85   | 0-0  | 0.00-0.00  |
|           | Apr 19 to Apr 25, 2021 | 82  | 0-9   | 0.00-12.33  | 0-0  | 0.00-0.00  |
|           | Apr 26 to May 2, 2021  | 95  | 4-23  | 5.56-31.94  | 0-0  | 0.00-0.00  |
|           | May 3 to May 9, 2021   | 80  | 0-10  | 0.00-14.29  | 0-0  | 0.00-0.00  |
|           | May 10 to May 16, 2021 | 82  | 0-13  | 0.00-18.84  | 0-0  | 0.00-0.00  |
|           | May 17 to May 23, 2021 | 101 | 18-35 | 27.27-53.03 | 0-0  | 0.00-0.00  |
|           | May 24 to May 30, 2021 | 70  | 0-5   | 0.00-7.69   | 0-0  | 0.00-0.00  |
| Yamaguchi |                        |     |       |             |      |            |
|           | Apr 5 to Apr 11, 2021  | 52  | 0-3   | 0.00-6.12   | 0-0  | 0.00-0.00  |
|           | Apr 12 to Apr 18, 2021 | 47  | 0-0   | 0.00-0.00   | 0-1  | 0.00-2.08  |

|           |                        |     |       |             |     |            |
|-----------|------------------------|-----|-------|-------------|-----|------------|
|           | Apr 19 to Apr 25, 2021 | 58  | 0-12  | 0.00-26.09  | 0-0 | 0.00-0.00  |
|           | Apr 26 to May 2, 2021  | 71  | 11-25 | 23.91-54.35 | 0-0 | 0.00-0.00  |
|           | May 3 to May 9, 2021   | 51  | 0-6   | 0.00-13.33  | 0-0 | 0.00-0.00  |
|           | May 10 to May 16, 2021 | 49  | 0-4   | 0.00-8.89   | 0-0 | 0.00-0.00  |
|           | May 17 to May 23, 2021 | 64  | 5-19  | 11.11-42.22 | 0-0 | 0.00-0.00  |
|           | May 24 to May 30, 2021 | 46  | 0-2   | 0.00-4.55   | 0-0 | 0.00-0.00  |
| Tokushima |                        |     |       |             |     |            |
|           | Apr 5 to Apr 11, 2021  | 26  | 0-0   | 0.00-0.00   | 0-6 | 0.00-18.75 |
|           | Apr 12 to Apr 18, 2021 | 37  | 0-6   | 0.00-19.35  | 0-0 | 0.00-0.00  |
|           | Apr 19 to Apr 25, 2021 | 38  | 0-10  | 0.00-35.71  | 0-0 | 0.00-0.00  |
|           | Apr 26 to May 2, 2021  | 27  | 0-0   | 0.00-0.00   | 0-0 | 0.00-0.00  |
|           | May 3 to May 9, 2021   | 32  | 0-4   | 0.00-14.29  | 0-0 | 0.00-0.00  |
|           | May 10 to May 16, 2021 | 36  | 0-9   | 0.00-33.33  | 0-0 | 0.00-0.00  |
|           | May 17 to May 23, 2021 | 30  | 0-3   | 0.00-11.11  | 0-0 | 0.00-0.00  |
|           | May 24 to May 30, 2021 | 31  | 0-4   | 0.00-14.81  | 0-0 | 0.00-0.00  |
| Kagawa    |                        |     |       |             |     |            |
|           | Apr 5 to Apr 11, 2021  | 34  | 0-0   | 0.00-0.00   | 0-1 | 0.00-2.86  |
|           | Apr 12 to Apr 18, 2021 | 39  | 0-5   | 0.00-14.71  | 0-0 | 0.00-0.00  |
|           | Apr 19 to Apr 25, 2021 | 27  | 0-0   | 0.00-0.00   | 0-7 | 0.00-20.59 |
|           | Apr 26 to May 2, 2021  | 36  | 0-3   | 0.00-9.09   | 0-0 | 0.00-0.00  |
|           | May 3 to May 9, 2021   | 34  | 0-2   | 0.00-6.25   | 0-0 | 0.00-0.00  |
|           | May 10 to May 16, 2021 | 36  | 0-5   | 0.00-16.13  | 0-0 | 0.00-0.00  |
|           | May 17 to May 23, 2021 | 34  | 0-3   | 0.00-9.68   | 0-0 | 0.00-0.00  |
|           | May 24 to May 30, 2021 | 38  | 0-9   | 0.00-31.03  | 0-0 | 0.00-0.00  |
| Ehime     |                        |     |       |             |     |            |
|           | Apr 5 to Apr 11, 2021  | 50  | 0-7   | 0.00-16.28  | 0-0 | 0.00-0.00  |
|           | Apr 12 to Apr 18, 2021 | 40  | 0-0   | 0.00-0.00   | 0-2 | 0.00-4.76  |
|           | Apr 19 to Apr 25, 2021 | 49  | 0-7   | 0.00-16.67  | 0-0 | 0.00-0.00  |
|           | Apr 26 to May 2, 2021  | 49  | 0-8   | 0.00-19.51  | 0-0 | 0.00-0.00  |
|           | May 3 to May 9, 2021   | 33  | 0-0   | 0.00-0.00   | 0-8 | 0.00-19.51 |
|           | May 10 to May 16, 2021 | 60  | 7-20  | 17.50-50.00 | 0-0 | 0.00-0.00  |
|           | May 17 to May 23, 2021 | 35  | 0-0   | 0.00-0.00   | 0-4 | 0.00-10.26 |
|           | May 24 to May 30, 2021 | 35  | 0-0   | 0.00-0.00   | 0-2 | 0.00-5.41  |
| Kochi     |                        |     |       |             |     |            |
|           | Apr 5 to Apr 11, 2021  | 35  | 0-8   | 0.00-29.63  | 0-0 | 0.00-0.00  |
|           | Apr 12 to Apr 18, 2021 | 26  | 0-0   | 0.00-0.00   | 0-1 | 0.00-3.70  |
|           | Apr 19 to Apr 25, 2021 | 19  | 0-0   | 0.00-0.00   | 0-7 | 0.00-26.92 |
|           | Apr 26 to May 2, 2021  | 19  | 0-0   | 0.00-0.00   | 0-6 | 0.00-24.00 |
|           | May 3 to May 9, 2021   | 22  | 0-0   | 0.00-0.00   | 0-2 | 0.00-8.33  |
|           | May 10 to May 16, 2021 | 34  | 0-10  | 0.00-41.67  | 0-0 | 0.00-0.00  |
|           | May 17 to May 23, 2021 | 32  | 0-9   | 0.00-39.13  | 0-0 | 0.00-0.00  |
|           | May 24 to May 30, 2021 | 24  | 0-2   | 0.00-9.09   | 0-0 | 0.00-0.00  |
| Fukuoka   |                        |     |       |             |     |            |
|           | Apr 5 to Apr 11, 2021  | 144 | 0-3   | 0.00-2.13   | 0-0 | 0.00-0.00  |
|           | Apr 12 to Apr 18, 2021 | 139 | 0-0   | 0.00-0.00   | 0-0 | 0.00-0.00  |
|           | Apr 19 to Apr 25, 2021 | 183 | 16-45 | 11.59-32.61 | 0-0 | 0.00-0.00  |

|          |                        |     |      |             |      |            |
|----------|------------------------|-----|------|-------------|------|------------|
|          | Apr 26 to May 2, 2021  | 148 | 0-13 | 0.00-9.63   | 0-0  | 0.00-0.00  |
|          | May 3 to May 9, 2021   | 155 | 0-23 | 0.00-17.42  | 0-0  | 0.00-0.00  |
|          | May 10 to May 16, 2021 | 153 | 0-22 | 0.00-16.79  | 0-0  | 0.00-0.00  |
|          | May 17 to May 23, 2021 | 159 | 0-29 | 0.00-22.31  | 0-0  | 0.00-0.00  |
|          | May 24 to May 30, 2021 | 157 | 1-31 | 0.79-24.60  | 0-0  | 0.00-0.00  |
| Saga     |                        |     |      |             |      |            |
|          | Apr 5 to Apr 11, 2021  | 31  | 0-3  | 0.00-10.71  | 0-0  | 0.00-0.00  |
|          | Apr 12 to Apr 18, 2021 | 32  | 0-4  | 0.00-14.29  | 0-0  | 0.00-0.00  |
|          | Apr 19 to Apr 25, 2021 | 31  | 0-4  | 0.00-14.81  | 0-0  | 0.00-0.00  |
|          | Apr 26 to May 2, 2021  | 33  | 0-7  | 0.00-26.92  | 0-0  | 0.00-0.00  |
|          | May 3 to May 9, 2021   | 28  | 0-2  | 0.00-7.69   | 0-0  | 0.00-0.00  |
|          | May 10 to May 16, 2021 | 43  | 7-17 | 26.92-65.38 | 0-0  | 0.00-0.00  |
|          | May 17 to May 23, 2021 | 26  | 0-0  | 0.00-0.00   | 0-0  | 0.00-0.00  |
|          | May 24 to May 30, 2021 | 21  | 0-0  | 0.00-0.00   | 0-4  | 0.00-16.00 |
| Nagasaki |                        |     |      |             |      |            |
|          | Apr 5 to Apr 11, 2021  | 42  | 0-0  | 0.00-0.00   | 0-6  | 0.00-12.50 |
|          | Apr 12 to Apr 18, 2021 | 46  | 0-0  | 0.00-0.00   | 0-1  | 0.00-2.13  |
|          | Apr 19 to Apr 25, 2021 | 50  | 0-4  | 0.00-8.70   | 0-0  | 0.00-0.00  |
|          | Apr 26 to May 2, 2021  | 46  | 0-0  | 0.00-0.00   | 0-0  | 0.00-0.00  |
|          | May 3 to May 9, 2021   | 56  | 0-11 | 0.00-24.44  | 0-0  | 0.00-0.00  |
|          | May 10 to May 16, 2021 | 59  | 3-16 | 6.98-37.21  | 0-0  | 0.00-0.00  |
|          | May 17 to May 23, 2021 | 36  | 0-0  | 0.00-0.00   | 0-6  | 0.00-14.29 |
|          | May 24 to May 30, 2021 | 52  | 0-11 | 0.00-26.83  | 0-0  | 0.00-0.00  |
| Kumamoto |                        |     |      |             |      |            |
|          | Apr 5 to Apr 11, 2021  | 42  | 0-0  | 0.00-0.00   | 1-17 | 1.69-28.81 |
|          | Apr 12 to Apr 18, 2021 | 60  | 0-0  | 0.00-0.00   | 0-0  | 0.00-0.00  |
|          | Apr 19 to Apr 25, 2021 | 66  | 0-8  | 0.00-13.79  | 0-0  | 0.00-0.00  |
|          | Apr 26 to May 2, 2021  | 64  | 0-6  | 0.00-10.34  | 0-0  | 0.00-0.00  |
|          | May 3 to May 9, 2021   | 65  | 0-9  | 0.00-16.07  | 0-0  | 0.00-0.00  |
|          | May 10 to May 16, 2021 | 66  | 0-11 | 0.00-20.00  | 0-0  | 0.00-0.00  |
|          | May 17 to May 23, 2021 | 66  | 0-12 | 0.00-22.22  | 0-0  | 0.00-0.00  |
|          | May 24 to May 30, 2021 | 60  | 0-7  | 0.00-13.21  | 0-0  | 0.00-0.00  |
| Oita     |                        |     |      |             |      |            |
|          | Apr 5 to Apr 11, 2021  | 36  | 0-0  | 0.00-0.00   | 0-0  | 0.00-0.00  |
|          | Apr 12 to Apr 18, 2021 | 46  | 0-11 | 0.00-31.43  | 0-0  | 0.00-0.00  |
|          | Apr 19 to Apr 25, 2021 | 44  | 0-9  | 0.00-25.71  | 0-0  | 0.00-0.00  |
|          | Apr 26 to May 2, 2021  | 38  | 0-3  | 0.00-8.57   | 0-0  | 0.00-0.00  |
|          | May 3 to May 9, 2021   | 39  | 0-6  | 0.00-18.18  | 0-0  | 0.00-0.00  |
|          | May 10 to May 16, 2021 | 42  | 0-7  | 0.00-20.00  | 0-0  | 0.00-0.00  |
|          | May 17 to May 23, 2021 | 26  | 0-0  | 0.00-0.00   | 0-8  | 0.00-23.53 |
|          | May 24 to May 30, 2021 | 27  | 0-0  | 0.00-0.00   | 0-5  | 0.00-15.63 |
| Miyazaki |                        |     |      |             |      |            |
|          | Apr 5 to Apr 11, 2021  | 22  | 0-0  | 0.00-0.00   | 2-14 | 5.56-38.89 |
|          | Apr 12 to Apr 18, 2021 | 36  | 0-0  | 0.00-0.00   | 0-0  | 0.00-0.00  |
|          | Apr 19 to Apr 25, 2021 | 44  | 0-9  | 0.00-25.71  | 0-0  | 0.00-0.00  |
|          | Apr 26 to May 2, 2021  | 45  | 0-9  | 0.00-25.00  | 0-0  | 0.00-0.00  |

|           |                        |    |      |            |      |            |
|-----------|------------------------|----|------|------------|------|------------|
|           | May 3 to May 9, 2021   | 46 | 0-11 | 0.00-31.43 | 0-0  | 0.00-0.00  |
|           | May 10 to May 16, 2021 | 34 | 0-0  | 0.00-0.00  | 0-1  | 0.00-2.86  |
|           | May 17 to May 23, 2021 | 38 | 0-4  | 0.00-11.76 | 0-0  | 0.00-0.00  |
|           | May 24 to May 30, 2021 | 35 | 0-3  | 0.00-9.38  | 0-0  | 0.00-0.00  |
| Kagoshima |                        |    |      |            |      |            |
|           | Apr 5 to Apr 11, 2021  | 67 | 0-8  | 0.00-13.56 | 0-0  | 0.00-0.00  |
|           | Apr 12 to Apr 18, 2021 | 47 | 0-0  | 0.00-0.00  | 0-12 | 0.00-20.34 |
|           | Apr 19 to Apr 25, 2021 | 63 | 0-7  | 0.00-12.50 | 0-0  | 0.00-0.00  |
|           | Apr 26 to May 2, 2021  | 44 | 0-0  | 0.00-0.00  | 0-12 | 0.00-21.43 |
|           | May 3 to May 9, 2021   | 59 | 0-4  | 0.00-7.27  | 0-0  | 0.00-0.00  |
|           | May 10 to May 16, 2021 | 53 | 0-0  | 0.00-0.00  | 0-2  | 0.00-3.64  |
|           | May 17 to May 23, 2021 | 59 | 0-6  | 0.00-11.32 | 0-0  | 0.00-0.00  |
|           | May 24 to May 30, 2021 | 62 | 0-11 | 0.00-21.57 | 0-0  | 0.00-0.00  |
| Okinawa   |                        |    |      |            |      |            |
|           | Apr 5 to Apr 11, 2021  | 28 | 0-1  | 0.00-3.70  | 0-0  | 0.00-0.00  |
|           | Apr 12 to Apr 18, 2021 | 30 | 0-3  | 0.00-11.11 | 0-0  | 0.00-0.00  |
|           | Apr 19 to Apr 25, 2021 | 22 | 0-0  | 0.00-0.00  | 0-6  | 0.00-21.43 |
|           | Apr 26 to May 2, 2021  | 24 | 0-0  | 0.00-0.00  | 0-3  | 0.00-11.11 |
|           | May 3 to May 9, 2021   | 22 | 0-0  | 0.00-0.00  | 0-4  | 0.00-15.38 |
|           | May 10 to May 16, 2021 | 28 | 0-2  | 0.00-7.69  | 0-0  | 0.00-0.00  |
|           | May 17 to May 23, 2021 | 23 | 0-0  | 0.00-0.00  | 0-2  | 0.00-8.00  |
|           | May 24 to May 30, 2021 | 20 | 0-0  | 0.00-0.00  | 0-5  | 0.00-20.00 |

---

**Table A.6: Weekly number of observed and excess/exiguous deaths in Japan and 47 prefectures for respiratory disease-related deaths in hospitals and clinics from January 2020 through May 2021.**

| Prefecture | Week                   | Observed | Excess deaths | Percent excess | Exiguous deaths | Percent exiguous |
|------------|------------------------|----------|---------------|----------------|-----------------|------------------|
| Japan      |                        |          |               |                |                 |                  |
|            | Apr 5 to Apr 11, 2021  | 2728     | 0–0           | 0.00–0.00      | 0–103           | 0.00–3.64        |
|            | Apr 12 to Apr 18, 2021 | 2793     | 0–9           | 0.00–0.32      | 0–0             | 0.00–0.00        |
|            | Apr 19 to Apr 25, 2021 | 2906     | 0–168         | 0.00–6.14      | 0–0             | 0.00–0.00        |
|            | Apr 26 to May 2, 2021  | 2916     | 0–242         | 0.00–9.05      | 0–0             | 0.00–0.00        |
|            | May 3 to May 9, 2021   | 2916     | 0–305         | 0.00–11.68     | 0–0             | 0.00–0.00        |
|            | May 10 to May 16, 2021 | 2907     | 5–358         | 0.20–14.04     | 0–0             | 0.00–0.00        |
|            | May 17 to May 23, 2021 | 2742     | 0–252         | 0.00–10.12     | 0–0             | 0.00–0.00        |
|            | May 24 to May 30, 2021 | 2603     | 0–184         | 0.00–7.61      | 0–0             | 0.00–0.00        |
| Hokkaido   |                        |          |               |                |                 |                  |
|            | Apr 5 to Apr 11, 2021  | 129      | 0–4           | 0.00–3.20      | 0–0             | 0.00–0.00        |
|            | Apr 12 to Apr 18, 2021 | 116      | 0–0           | 0.00–0.00      | 0–9             | 0.00–7.20        |
|            | Apr 19 to Apr 25, 2021 | 116      | 0–0           | 0.00–0.00      | 0–8             | 0.00–6.45        |
|            | Apr 26 to May 2, 2021  | 147      | 0–24          | 0.00–19.51     | 0–0             | 0.00–0.00        |
|            | May 3 to May 9, 2021   | 131      | 0–9           | 0.00–7.38      | 0–0             | 0.00–0.00        |
|            | May 10 to May 16, 2021 | 146      | 0–26          | 0.00–21.67     | 0–0             | 0.00–0.00        |
|            | May 17 to May 23, 2021 | 130      | 0–11          | 0.00–9.24      | 0–0             | 0.00–0.00        |
|            | May 24 to May 30, 2021 | 130      | 0–12          | 0.00–10.17     | 0–0             | 0.00–0.00        |
| Aomori     |                        |          |               |                |                 |                  |
|            | Apr 5 to Apr 11, 2021  | 29       | 0–0           | 0.00–0.00      | 0–2             | 0.00–6.45        |
|            | Apr 12 to Apr 18, 2021 | 36       | 0–5           | 0.00–16.13     | 0–0             | 0.00–0.00        |
|            | Apr 19 to Apr 25, 2021 | 33       | 0–2           | 0.00–6.45      | 0–0             | 0.00–0.00        |
|            | Apr 26 to May 2, 2021  | 31       | 0–0           | 0.00–0.00      | 0–0             | 0.00–0.00        |
|            | May 3 to May 9, 2021   | 35       | 0–5           | 0.00–16.67     | 0–0             | 0.00–0.00        |
|            | May 10 to May 16, 2021 | 44       | 4–15          | 13.79–51.72    | 0–0             | 0.00–0.00        |
|            | May 17 to May 23, 2021 | 32       | 0–3           | 0.00–10.34     | 0–0             | 0.00–0.00        |
|            | May 24 to May 30, 2021 | 30       | 0–0           | 0.00–0.00      | 0–0             | 0.00–0.00        |
| Iwate      |                        |          |               |                |                 |                  |
|            | Apr 5 to Apr 11, 2021  | 25       | 0–0           | 0.00–0.00      | 0–8             | 0.00–24.24       |
|            | Apr 12 to Apr 18, 2021 | 42       | 0–10          | 0.00–31.25     | 0–0             | 0.00–0.00        |
|            | Apr 19 to Apr 25, 2021 | 27       | 0–0           | 0.00–0.00      | 0–5             | 0.00–15.63       |
|            | Apr 26 to May 2, 2021  | 30       | 0–0           | 0.00–0.00      | 0–2             | 0.00–6.25        |
|            | May 3 to May 9, 2021   | 30       | 0–0           | 0.00–0.00      | 0–1             | 0.00–3.23        |
|            | May 10 to May 16, 2021 | 16       | 0–0           | 0.00–0.00      | 3–14            | 10.00–46.67      |
|            | May 17 to May 23, 2021 | 34       | 0–5           | 0.00–17.24     | 0–0             | 0.00–0.00        |
|            | May 24 to May 30, 2021 | 29       | 0–1           | 0.00–3.57      | 0–0             | 0.00–0.00        |
| Miyagi     |                        |          |               |                |                 |                  |
|            | Apr 5 to Apr 11, 2021  | 46       | 0–5           | 0.00–12.20     | 0–0             | 0.00–0.00        |
|            | Apr 12 to Apr 18, 2021 | 47       | 0–8           | 0.00–20.51     | 0–0             | 0.00–0.00        |
|            | Apr 19 to Apr 25, 2021 | 38       | 0–0           | 0.00–0.00      | 0–1             | 0.00–2.56        |
|            | Apr 26 to May 2, 2021  | 30       | 0–0           | 0.00–0.00      | 0–9             | 0.00–23.08       |
|            | May 3 to May 9, 2021   | 50       | 0–12          | 0.00–31.58     | 0–0             | 0.00–0.00        |

|           |                        |    |      |             |      |            |
|-----------|------------------------|----|------|-------------|------|------------|
|           | May 10 to May 16, 2021 | 36 | 0-0  | 0.00-0.00   | 0-2  | 0.00-5.26  |
|           | May 17 to May 23, 2021 | 45 | 0-7  | 0.00-18.42  | 0-0  | 0.00-0.00  |
|           | May 24 to May 30, 2021 | 36 | 0-0  | 0.00-0.00   | 0-1  | 0.00-2.70  |
| Akita     |                        |    |      |             |      |            |
|           | Apr 5 to Apr 11, 2021  | 31 | 0-0  | 0.00-0.00   | 0-1  | 0.00-3.13  |
|           | Apr 12 to Apr 18, 2021 | 21 | 0-0  | 0.00-0.00   | 0-11 | 0.00-34.38 |
|           | Apr 19 to Apr 25, 2021 | 34 | 0-2  | 0.00-6.25   | 0-0  | 0.00-0.00  |
|           | Apr 26 to May 2, 2021  | 49 | 7-18 | 22.58-58.06 | 0-0  | 0.00-0.00  |
|           | May 3 to May 9, 2021   | 29 | 0-0  | 0.00-0.00   | 0-2  | 0.00-6.45  |
|           | May 10 to May 16, 2021 | 24 | 0-0  | 0.00-0.00   | 0-6  | 0.00-20.00 |
|           | May 17 to May 23, 2021 | 32 | 0-3  | 0.00-10.34  | 0-0  | 0.00-0.00  |
|           | May 24 to May 30, 2021 | 26 | 0-0  | 0.00-0.00   | 0-1  | 0.00-3.70  |
| Yamagata  |                        |    |      |             |      |            |
|           | Apr 5 to Apr 11, 2021  | 22 | 0-0  | 0.00-0.00   | 0-6  | 0.00-21.43 |
|           | Apr 12 to Apr 18, 2021 | 26 | 0-0  | 0.00-0.00   | 0-2  | 0.00-7.14  |
|           | Apr 19 to Apr 25, 2021 | 27 | 0-0  | 0.00-0.00   | 0-1  | 0.00-3.57  |
|           | Apr 26 to May 2, 2021  | 21 | 0-0  | 0.00-0.00   | 0-5  | 0.00-19.23 |
|           | May 3 to May 9, 2021   | 21 | 0-0  | 0.00-0.00   | 0-5  | 0.00-19.23 |
|           | May 10 to May 16, 2021 | 30 | 0-5  | 0.00-20.00  | 0-0  | 0.00-0.00  |
|           | May 17 to May 23, 2021 | 29 | 0-5  | 0.00-20.83  | 0-0  | 0.00-0.00  |
|           | May 24 to May 30, 2021 | 24 | 0-1  | 0.00-4.35   | 0-0  | 0.00-0.00  |
| Fukushima |                        |    |      |             |      |            |
|           | Apr 5 to Apr 11, 2021  | 41 | 0-0  | 0.00-0.00   | 0-4  | 0.00-8.89  |
|           | Apr 12 to Apr 18, 2021 | 30 | 0-0  | 0.00-0.00   | 1-15 | 2.22-33.33 |
|           | Apr 19 to Apr 25, 2021 | 49 | 0-5  | 0.00-11.36  | 0-0  | 0.00-0.00  |
|           | Apr 26 to May 2, 2021  | 52 | 0-9  | 0.00-20.93  | 0-0  | 0.00-0.00  |
|           | May 3 to May 9, 2021   | 57 | 0-15 | 0.00-35.71  | 0-0  | 0.00-0.00  |
|           | May 10 to May 16, 2021 | 46 | 0-4  | 0.00-9.52   | 0-0  | 0.00-0.00  |
|           | May 17 to May 23, 2021 | 49 | 0-7  | 0.00-16.67  | 0-0  | 0.00-0.00  |
|           | May 24 to May 30, 2021 | 43 | 0-3  | 0.00-7.50   | 0-0  | 0.00-0.00  |
| Ibaraki   |                        |    |      |             |      |            |
|           | Apr 5 to Apr 11, 2021  | 65 | 0-0  | 0.00-0.00   | 0-8  | 0.00-10.96 |
|           | Apr 12 to Apr 18, 2021 | 83 | 0-12 | 0.00-16.90  | 0-0  | 0.00-0.00  |
|           | Apr 19 to Apr 25, 2021 | 71 | 0-1  | 0.00-1.43   | 0-0  | 0.00-0.00  |
|           | Apr 26 to May 2, 2021  | 62 | 0-0  | 0.00-0.00   | 0-6  | 0.00-8.82  |
|           | May 3 to May 9, 2021   | 70 | 0-3  | 0.00-4.48   | 0-0  | 0.00-0.00  |
|           | May 10 to May 16, 2021 | 70 | 0-4  | 0.00-6.06   | 0-0  | 0.00-0.00  |
|           | May 17 to May 23, 2021 | 61 | 0-0  | 0.00-0.00   | 0-3  | 0.00-4.69  |
|           | May 24 to May 30, 2021 | 66 | 0-3  | 0.00-4.76   | 0-0  | 0.00-0.00  |
| Tochigi   |                        |    |      |             |      |            |
|           | Apr 5 to Apr 11, 2021  | 37 | 0-0  | 0.00-0.00   | 0-4  | 0.00-9.76  |
|           | Apr 12 to Apr 18, 2021 | 43 | 0-3  | 0.00-7.50   | 0-0  | 0.00-0.00  |
|           | Apr 19 to Apr 25, 2021 | 43 | 0-4  | 0.00-10.26  | 0-0  | 0.00-0.00  |
|           | Apr 26 to May 2, 2021  | 44 | 0-6  | 0.00-15.79  | 0-0  | 0.00-0.00  |
|           | May 3 to May 9, 2021   | 44 | 0-7  | 0.00-18.92  | 0-0  | 0.00-0.00  |
|           | May 10 to May 16, 2021 | 40 | 0-4  | 0.00-11.11  | 0-0  | 0.00-0.00  |



|          |                        |     |      |            |      |            |
|----------|------------------------|-----|------|------------|------|------------|
|          | May 17 to May 23, 2021 | 38  | 0-3  | 0.00-8.57  | 0-0  | 0.00-0.00  |
|          | May 24 to May 30, 2021 | 28  | 0-0  | 0.00-0.00  | 0-6  | 0.00-17.65 |
| Gunma    |                        |     |      |            |      |            |
|          | Apr 5 to Apr 11, 2021  | 52  | 0-0  | 0.00-0.00  | 0-0  | 0.00-0.00  |
|          | Apr 12 to Apr 18, 2021 | 65  | 0-14 | 0.00-27.45 | 0-0  | 0.00-0.00  |
|          | Apr 19 to Apr 25, 2021 | 42  | 0-0  | 0.00-0.00  | 0-9  | 0.00-17.65 |
|          | Apr 26 to May 2, 2021  | 49  | 0-0  | 0.00-0.00  | 0-0  | 0.00-0.00  |
|          | May 3 to May 9, 2021   | 49  | 0-0  | 0.00-0.00  | 0-0  | 0.00-0.00  |
|          | May 10 to May 16, 2021 | 60  | 0-12 | 0.00-25.00 | 0-0  | 0.00-0.00  |
|          | May 17 to May 23, 2021 | 43  | 0-0  | 0.00-0.00  | 0-3  | 0.00-6.52  |
|          | May 24 to May 30, 2021 | 47  | 0-2  | 0.00-4.44  | 0-0  | 0.00-0.00  |
| Saitama  |                        |     |      |            |      |            |
|          | Apr 5 to Apr 11, 2021  | 151 | 0-0  | 0.00-0.00  | 0-5  | 0.00-3.21  |
|          | Apr 12 to Apr 18, 2021 | 152 | 0-1  | 0.00-0.66  | 0-0  | 0.00-0.00  |
|          | Apr 19 to Apr 25, 2021 | 180 | 4-34 | 2.74-23.29 | 0-0  | 0.00-0.00  |
|          | Apr 26 to May 2, 2021  | 170 | 0-26 | 0.00-18.06 | 0-0  | 0.00-0.00  |
|          | May 3 to May 9, 2021   | 171 | 4-32 | 2.88-23.02 | 0-0  | 0.00-0.00  |
|          | May 10 to May 16, 2021 | 163 | 0-27 | 0.00-19.85 | 0-0  | 0.00-0.00  |
|          | May 17 to May 23, 2021 | 163 | 1-30 | 0.75-22.56 | 0-0  | 0.00-0.00  |
|          | May 24 to May 30, 2021 | 140 | 0-11 | 0.00-8.53  | 0-0  | 0.00-0.00  |
| Chiba    |                        |     |      |            |      |            |
|          | Apr 5 to Apr 11, 2021  | 137 | 0-7  | 0.00-5.38  | 0-0  | 0.00-0.00  |
|          | Apr 12 to Apr 18, 2021 | 117 | 0-0  | 0.00-0.00  | 0-9  | 0.00-7.14  |
|          | Apr 19 to Apr 25, 2021 | 115 | 0-0  | 0.00-0.00  | 0-11 | 0.00-8.73  |
|          | Apr 26 to May 2, 2021  | 136 | 0-13 | 0.00-10.57 | 0-0  | 0.00-0.00  |
|          | May 3 to May 9, 2021   | 125 | 0-6  | 0.00-5.04  | 0-0  | 0.00-0.00  |
|          | May 10 to May 16, 2021 | 121 | 0-2  | 0.00-1.68  | 0-0  | 0.00-0.00  |
|          | May 17 to May 23, 2021 | 123 | 0-7  | 0.00-6.03  | 0-0  | 0.00-0.00  |
|          | May 24 to May 30, 2021 | 118 | 0-4  | 0.00-3.51  | 0-0  | 0.00-0.00  |
| Tokyo    |                        |     |      |            |      |            |
|          | Apr 5 to Apr 11, 2021  | 213 | 0-0  | 0.00-0.00  | 0-6  | 0.00-2.74  |
|          | Apr 12 to Apr 18, 2021 | 242 | 0-29 | 0.00-13.62 | 0-0  | 0.00-0.00  |
|          | Apr 19 to Apr 25, 2021 | 249 | 0-41 | 0.00-19.71 | 0-0  | 0.00-0.00  |
|          | Apr 26 to May 2, 2021  | 237 | 0-31 | 0.00-15.05 | 0-0  | 0.00-0.00  |
|          | May 3 to May 9, 2021   | 228 | 0-27 | 0.00-13.43 | 0-0  | 0.00-0.00  |
|          | May 10 to May 16, 2021 | 215 | 0-18 | 0.00-9.14  | 0-0  | 0.00-0.00  |
|          | May 17 to May 23, 2021 | 216 | 0-24 | 0.00-12.50 | 0-0  | 0.00-0.00  |
|          | May 24 to May 30, 2021 | 221 | 0-32 | 0.00-16.93 | 0-0  | 0.00-0.00  |
| Kanagawa |                        |     |      |            |      |            |
|          | Apr 5 to Apr 11, 2021  | 145 | 0-0  | 0.00-0.00  | 0-15 | 0.00-9.38  |
|          | Apr 12 to Apr 18, 2021 | 164 | 0-8  | 0.00-5.13  | 0-0  | 0.00-0.00  |
|          | Apr 19 to Apr 25, 2021 | 168 | 0-19 | 0.00-12.75 | 0-0  | 0.00-0.00  |
|          | Apr 26 to May 2, 2021  | 161 | 0-14 | 0.00-9.52  | 0-0  | 0.00-0.00  |
|          | May 3 to May 9, 2021   | 154 | 0-11 | 0.00-7.69  | 0-0  | 0.00-0.00  |
|          | May 10 to May 16, 2021 | 148 | 0-7  | 0.00-4.96  | 0-0  | 0.00-0.00  |
|          | May 17 to May 23, 2021 | 163 | 0-27 | 0.00-19.85 | 0-0  | 0.00-0.00  |

|                        |                        |     |           |             |            |            |
|------------------------|------------------------|-----|-----------|-------------|------------|------------|
| Niigata                | May 24 to May 30, 2021 | 131 | 0-0       | 0.00-0.00   | 0-1        | 0.00-0.76  |
|                        | Apr 5 to Apr 11, 2021  | 56  | 0-3       | 0.00-5.66   | 0-0        | 0.00-0.00  |
|                        | Apr 12 to Apr 18, 2021 | 50  | 0-0       | 0.00-0.00   | 0-3        | 0.00-5.66  |
|                        | Apr 19 to Apr 25, 2021 | 48  | 0-0       | 0.00-0.00   | 0-4        | 0.00-7.69  |
|                        | Apr 26 to May 2, 2021  | 48  | 0-0       | 0.00-0.00   | 0-3        | 0.00-5.88  |
|                        | May 3 to May 9, 2021   | 42  | 0-0       | 0.00-0.00   | 0-8        | 0.00-16.00 |
|                        | May 10 to May 16, 2021 | 55  | 0-6       | 0.00-12.24  | 0-0        | 0.00-0.00  |
|                        | May 17 to May 23, 2021 | 46  | 0-0       | 0.00-0.00   | 0-1        | 0.00-2.13  |
| Toyama                 | May 24 to May 30, 2021 | 43  | 0-0       | 0.00-0.00   | 0-4        | 0.00-8.51  |
|                        | Apr 5 to Apr 11, 2021  | 32  | 0-6       | 0.00-23.08  | 0-0        | 0.00-0.00  |
|                        | Apr 12 to Apr 18, 2021 | 22  | 0-0       | 0.00-0.00   | 0-3        | 0.00-12.00 |
|                        | Apr 19 to Apr 25, 2021 | 29  | 0-4       | 0.00-16.00  | 0-0        | 0.00-0.00  |
|                        | Apr 26 to May 2, 2021  | 26  | 0-1       | 0.00-4.00   | 0-0        | 0.00-0.00  |
|                        | May 3 to May 9, 2021   | 28  | 0-4       | 0.00-16.67  | 0-0        | 0.00-0.00  |
|                        | May 10 to May 16, 2021 | 25  | 0-1       | 0.00-4.17   | 0-0        | 0.00-0.00  |
|                        | May 17 to May 23, 2021 | 23  | 0-0       | 0.00-0.00   | 0-1        | 0.00-4.17  |
| Ishikawa               | May 24 to May 30, 2021 | 25  | 0-2       | 0.00-8.70   | 0-0        | 0.00-0.00  |
|                        | Apr 5 to Apr 11, 2021  | 21  | 0-0       | 0.00-0.00   | 0-3        | 0.00-12.50 |
|                        | Apr 12 to Apr 18, 2021 | 28  | 0-4       | 0.00-16.67  | 0-0        | 0.00-0.00  |
|                        | Apr 19 to Apr 25, 2021 | 19  | 0-0       | 0.00-0.00   | 0-5        | 0.00-20.83 |
|                        | Apr 26 to May 2, 2021  | 28  | 0-4       | 0.00-16.67  | 0-0        | 0.00-0.00  |
|                        | May 3 to May 9, 2021   | 32  | 0-9       | 0.00-39.13  | 0-0        | 0.00-0.00  |
|                        | May 10 to May 16, 2021 | 24  | 0-2       | 0.00-9.09   | 0-0        | 0.00-0.00  |
|                        | May 17 to May 23, 2021 | 16  | 0-0       | 0.00-0.00   | 0-6        | 0.00-27.27 |
| Fukui                  | May 24 to May 30, 2021 | 32  | 1-10      | 4.55-45.45  | 0-0        | 0.00-0.00  |
|                        | Apr 5 to Apr 11, 2021  | 31  | 1-11      | 5.00-55.00  | 0-0        | 0.00-0.00  |
|                        | Apr 12 to Apr 18, 2021 | 16  | 0-0       | 0.00-0.00   | 0-5        | 0.00-23.81 |
|                        | Apr 19 to Apr 25, 2021 | 17  | 0-0       | 0.00-0.00   | 0-3        | 0.00-15.00 |
|                        | Apr 26 to May 2, 2021  | 26  | 0-7       | 0.00-36.84  | 0-0        | 0.00-0.00  |
|                        | May 3 to May 9, 2021   | 23  | 0-4       | 0.00-21.05  | 0-0        | 0.00-0.00  |
|                        | May 10 to May 16, 2021 | 25  | 0-6       | 0.00-31.58  | 0-0        | 0.00-0.00  |
|                        | May 17 to May 23, 2021 | 25  | 0-6       | 0.00-31.58  | 0-0        | 0.00-0.00  |
| Yamanashi              | May 24 to May 30, 2021 | 22  | 0-4       | 0.00-22.22  | 0-0        | 0.00-0.00  |
|                        | Apr 5 to Apr 11, 2021  | 15  | 0-0       | 0.00-0.00   | 0-4        | 0.00-21.05 |
|                        | Apr 12 to Apr 18, 2021 | 16  | 0-0       | 0.00-0.00   | 0-3        | 0.00-15.79 |
|                        | Apr 19 to Apr 25, 2021 | 28  | 1-10      | 5.56-55.56  | 0-0        | 0.00-0.00  |
|                        | Apr 26 to May 2, 2021  | 19  | 0-1       | 0.00-5.56   | 0-0        | 0.00-0.00  |
|                        | May 3 to May 9, 2021   | 29  | 3-11      | 16.67-61.11 | 0-0        | 0.00-0.00  |
|                        | May 10 to May 16, 2021 | 21  | 0-3       | 0.00-16.67  | 0-0        | 0.00-0.00  |
|                        | May 17 to May 23, 2021 | 21  | 0-3       | 0.00-16.67  | 0-0        | 0.00-0.00  |
| May 24 to May 30, 2021 | 15                     | 0-0 | 0.00-0.00 | 0-2         | 0.00-11.76 |            |

Nagano

|                        |    |      |            |     |           |
|------------------------|----|------|------------|-----|-----------|
| Apr 5 to Apr 11, 2021  | 49 | 0-4  | 0.00-8.89  | 0-0 | 0.00-0.00 |
| Apr 12 to Apr 18, 2021 | 42 | 0-0  | 0.00-0.00  | 0-2 | 0.00-4.55 |
| Apr 19 to Apr 25, 2021 | 39 | 0-0  | 0.00-0.00  | 0-4 | 0.00-9.30 |
| Apr 26 to May 2, 2021  | 55 | 0-12 | 0.00-27.91 | 0-0 | 0.00-0.00 |
| May 3 to May 9, 2021   | 45 | 0-4  | 0.00-9.76  | 0-0 | 0.00-0.00 |
| May 10 to May 16, 2021 | 51 | 0-10 | 0.00-24.39 | 0-0 | 0.00-0.00 |
| May 17 to May 23, 2021 | 46 | 0-7  | 0.00-17.95 | 0-0 | 0.00-0.00 |
| May 24 to May 30, 2021 | 47 | 0-9  | 0.00-23.68 | 0-0 | 0.00-0.00 |

Gifu

|                        |    |      |             |      |            |
|------------------------|----|------|-------------|------|------------|
| Apr 5 to Apr 11, 2021  | 39 | 0-0  | 0.00-0.00   | 0-10 | 0.00-20.41 |
| Apr 12 to Apr 18, 2021 | 49 | 0-2  | 0.00-4.26   | 0-0  | 0.00-0.00  |
| Apr 19 to Apr 25, 2021 | 45 | 0-0  | 0.00-0.00   | 0-1  | 0.00-2.17  |
| Apr 26 to May 2, 2021  | 45 | 0-0  | 0.00-0.00   | 0-0  | 0.00-0.00  |
| May 3 to May 9, 2021   | 52 | 0-9  | 0.00-20.93  | 0-0  | 0.00-0.00  |
| May 10 to May 16, 2021 | 63 | 6-21 | 14.29-50.00 | 0-0  | 0.00-0.00  |
| May 17 to May 23, 2021 | 50 | 0-9  | 0.00-21.95  | 0-0  | 0.00-0.00  |
| May 24 to May 30, 2021 | 41 | 0-1  | 0.00-2.50   | 0-0  | 0.00-0.00  |

Shizuoka

|                        |    |      |            |      |            |
|------------------------|----|------|------------|------|------------|
| Apr 5 to Apr 11, 2021  | 67 | 0-0  | 0.00-0.00  | 0-9  | 0.00-11.84 |
| Apr 12 to Apr 18, 2021 | 58 | 0-0  | 0.00-0.00  | 0-17 | 0.00-22.67 |
| Apr 19 to Apr 25, 2021 | 82 | 0-10 | 0.00-13.89 | 0-0  | 0.00-0.00  |
| Apr 26 to May 2, 2021  | 82 | 0-14 | 0.00-20.59 | 0-0  | 0.00-0.00  |
| May 3 to May 9, 2021   | 73 | 0-6  | 0.00-8.96  | 0-0  | 0.00-0.00  |
| May 10 to May 16, 2021 | 62 | 0-0  | 0.00-0.00  | 0-2  | 0.00-3.13  |
| May 17 to May 23, 2021 | 79 | 0-18 | 0.00-29.51 | 0-0  | 0.00-0.00  |
| May 24 to May 30, 2021 | 69 | 0-10 | 0.00-16.95 | 0-0  | 0.00-0.00  |

Aichi

|                        |     |      |            |      |            |
|------------------------|-----|------|------------|------|------------|
| Apr 5 to Apr 11, 2021  | 127 | 0-0  | 0.00-0.00  | 0-20 | 0.00-13.61 |
| Apr 12 to Apr 18, 2021 | 149 | 0-6  | 0.00-4.20  | 0-0  | 0.00-0.00  |
| Apr 19 to Apr 25, 2021 | 152 | 0-11 | 0.00-7.80  | 0-0  | 0.00-0.00  |
| Apr 26 to May 2, 2021  | 165 | 0-27 | 0.00-19.57 | 0-0  | 0.00-0.00  |
| May 3 to May 9, 2021   | 144 | 0-9  | 0.00-6.67  | 0-0  | 0.00-0.00  |
| May 10 to May 16, 2021 | 148 | 0-17 | 0.00-12.98 | 0-0  | 0.00-0.00  |
| May 17 to May 23, 2021 | 129 | 0-1  | 0.00-0.78  | 0-0  | 0.00-0.00  |
| May 24 to May 30, 2021 | 136 | 0-12 | 0.00-9.68  | 0-0  | 0.00-0.00  |

Mie

|                        |    |      |            |     |           |
|------------------------|----|------|------------|-----|-----------|
| Apr 5 to Apr 11, 2021  | 38 | 0-0  | 0.00-0.00  | 0-2 | 0.00-5.00 |
| Apr 12 to Apr 18, 2021 | 45 | 0-6  | 0.00-15.38 | 0-0 | 0.00-0.00 |
| Apr 19 to Apr 25, 2021 | 44 | 0-5  | 0.00-12.82 | 0-0 | 0.00-0.00 |
| Apr 26 to May 2, 2021  | 45 | 0-6  | 0.00-15.38 | 0-0 | 0.00-0.00 |
| May 3 to May 9, 2021   | 52 | 2-16 | 5.56-44.44 | 0-0 | 0.00-0.00 |
| May 10 to May 16, 2021 | 39 | 0-3  | 0.00-8.33  | 0-0 | 0.00-0.00 |
| May 17 to May 23, 2021 | 37 | 0-2  | 0.00-5.71  | 0-0 | 0.00-0.00 |
| May 24 to May 30, 2021 | 39 | 0-5  | 0.00-14.71 | 0-0 | 0.00-0.00 |

Shiga

|          |                        |     |      |             |      |            |
|----------|------------------------|-----|------|-------------|------|------------|
|          | Apr 5 to Apr 11, 2021  | 34  | 0-7  | 0.00-25.93  | 0-0  | 0.00-0.00  |
|          | Apr 12 to Apr 18, 2021 | 25  | 0-0  | 0.00-0.00   | 0-1  | 0.00-3.85  |
|          | Apr 19 to Apr 25, 2021 | 24  | 0-0  | 0.00-0.00   | 0-2  | 0.00-7.69  |
|          | Apr 26 to May 2, 2021  | 28  | 0-3  | 0.00-12.00  | 0-0  | 0.00-0.00  |
|          | May 3 to May 9, 2021   | 39  | 4-15 | 16.67-62.50 | 0-0  | 0.00-0.00  |
|          | May 10 to May 16, 2021 | 28  | 0-4  | 0.00-16.67  | 0-0  | 0.00-0.00  |
|          | May 17 to May 23, 2021 | 28  | 0-5  | 0.00-21.74  | 0-0  | 0.00-0.00  |
|          | May 24 to May 30, 2021 | 16  | 0-0  | 0.00-0.00   | 0-6  | 0.00-27.27 |
| Kyoto    |                        |     |      |             |      |            |
|          | Apr 5 to Apr 11, 2021  | 51  | 0-0  | 0.00-0.00   | 0-7  | 0.00-12.07 |
|          | Apr 12 to Apr 18, 2021 | 45  | 0-0  | 0.00-0.00   | 0-12 | 0.00-21.05 |
|          | Apr 19 to Apr 25, 2021 | 37  | 0-0  | 0.00-0.00   | 4-19 | 7.14-33.93 |
|          | Apr 26 to May 2, 2021  | 59  | 0-4  | 0.00-7.27   | 0-0  | 0.00-0.00  |
|          | May 3 to May 9, 2021   | 66  | 0-13 | 0.00-24.53  | 0-0  | 0.00-0.00  |
|          | May 10 to May 16, 2021 | 52  | 0-1  | 0.00-1.96   | 0-0  | 0.00-0.00  |
|          | May 17 to May 23, 2021 | 40  | 0-0  | 0.00-0.00   | 0-10 | 0.00-20.00 |
|          | May 24 to May 30, 2021 | 48  | 0-0  | 0.00-0.00   | 0-0  | 0.00-0.00  |
| Osaka    |                        |     |      |             |      |            |
|          | Apr 5 to Apr 11, 2021  | 226 | 0-0  | 0.00-0.00   | 0-0  | 0.00-0.00  |
|          | Apr 12 to Apr 18, 2021 | 214 | 0-0  | 0.00-0.00   | 0-11 | 0.00-4.89  |
|          | Apr 19 to Apr 25, 2021 | 231 | 0-12 | 0.00-5.48   | 0-0  | 0.00-0.00  |
|          | Apr 26 to May 2, 2021  | 200 | 0-0  | 0.00-0.00   | 0-15 | 0.00-6.98  |
|          | May 3 to May 9, 2021   | 237 | 0-26 | 0.00-12.32  | 0-0  | 0.00-0.00  |
|          | May 10 to May 16, 2021 | 248 | 1-40 | 0.48-19.23  | 0-0  | 0.00-0.00  |
|          | May 17 to May 23, 2021 | 199 | 0-0  | 0.00-0.00   | 0-6  | 0.00-2.93  |
|          | May 24 to May 30, 2021 | 235 | 0-34 | 0.00-16.92  | 0-0  | 0.00-0.00  |
| Hyogo    |                        |     |      |             |      |            |
|          | Apr 5 to Apr 11, 2021  | 116 | 0-0  | 0.00-0.00   | 0-5  | 0.00-4.13  |
|          | Apr 12 to Apr 18, 2021 | 114 | 0-0  | 0.00-0.00   | 0-6  | 0.00-5.00  |
|          | Apr 19 to Apr 25, 2021 | 115 | 0-0  | 0.00-0.00   | 0-3  | 0.00-2.54  |
|          | Apr 26 to May 2, 2021  | 117 | 0-3  | 0.00-2.63   | 0-0  | 0.00-0.00  |
|          | May 3 to May 9, 2021   | 118 | 0-9  | 0.00-8.26   | 0-0  | 0.00-0.00  |
|          | May 10 to May 16, 2021 | 126 | 0-19 | 0.00-17.76  | 0-0  | 0.00-0.00  |
|          | May 17 to May 23, 2021 | 126 | 0-20 | 0.00-18.87  | 0-0  | 0.00-0.00  |
|          | May 24 to May 30, 2021 | 94  | 0-0  | 0.00-0.00   | 0-10 | 0.00-9.62  |
| Nara     |                        |     |      |             |      |            |
|          | Apr 5 to Apr 11, 2021  | 32  | 0-0  | 0.00-0.00   | 0-3  | 0.00-8.57  |
|          | Apr 12 to Apr 18, 2021 | 31  | 0-0  | 0.00-0.00   | 0-4  | 0.00-11.43 |
|          | Apr 19 to Apr 25, 2021 | 36  | 0-2  | 0.00-5.88   | 0-0  | 0.00-0.00  |
|          | Apr 26 to May 2, 2021  | 32  | 0-0  | 0.00-0.00   | 0-2  | 0.00-5.88  |
|          | May 3 to May 9, 2021   | 28  | 0-0  | 0.00-0.00   | 0-5  | 0.00-15.15 |
|          | May 10 to May 16, 2021 | 38  | 0-6  | 0.00-18.75  | 0-0  | 0.00-0.00  |
|          | May 17 to May 23, 2021 | 30  | 0-0  | 0.00-0.00   | 0-1  | 0.00-3.23  |
|          | May 24 to May 30, 2021 | 31  | 0-1  | 0.00-3.33   | 0-0  | 0.00-0.00  |
| Wakayama |                        |     |      |             |      |            |
|          | Apr 5 to Apr 11, 2021  | 27  | 0-0  | 0.00-0.00   | 0-1  | 0.00-3.57  |

|           |                        |    |      |             |      |             |
|-----------|------------------------|----|------|-------------|------|-------------|
|           | Apr 12 to Apr 18, 2021 | 28 | 0-0  | 0.00-0.00   | 0-0  | 0.00-0.00   |
|           | Apr 19 to Apr 25, 2021 | 30 | 0-2  | 0.00-7.14   | 0-0  | 0.00-0.00   |
|           | Apr 26 to May 2, 2021  | 20 | 0-0  | 0.00-0.00   | 0-8  | 0.00-28.57  |
|           | May 3 to May 9, 2021   | 22 | 0-0  | 0.00-0.00   | 0-5  | 0.00-18.52  |
|           | May 10 to May 16, 2021 | 13 | 0-0  | 0.00-0.00   | 4-14 | 14.81-51.85 |
|           | May 17 to May 23, 2021 | 19 | 0-0  | 0.00-0.00   | 0-7  | 0.00-26.92  |
|           | May 24 to May 30, 2021 | 20 | 0-0  | 0.00-0.00   | 0-5  | 0.00-20.00  |
| Tottori   |                        |    |      |             |      |             |
|           | Apr 5 to Apr 11, 2021  | 7  | 0-0  | 0.00-0.00   | 0-7  | 0.00-50.00  |
|           | Apr 12 to Apr 18, 2021 | 9  | 0-0  | 0.00-0.00   | 0-4  | 0.00-30.77  |
|           | Apr 19 to Apr 25, 2021 | 13 | 0-0  | 0.00-0.00   | 0-0  | 0.00-0.00   |
|           | Apr 26 to May 2, 2021  | 10 | 0-0  | 0.00-0.00   | 0-2  | 0.00-16.67  |
|           | May 3 to May 9, 2021   | 12 | 0-0  | 0.00-0.00   | 0-0  | 0.00-0.00   |
|           | May 10 to May 16, 2021 | 11 | 0-0  | 0.00-0.00   | 0-0  | 0.00-0.00   |
|           | May 17 to May 23, 2021 | 11 | 0-0  | 0.00-0.00   | 0-1  | 0.00-8.33   |
|           | May 24 to May 30, 2021 | 12 | 0-1  | 0.00-9.09   | 0-0  | 0.00-0.00   |
| Shimane   |                        |    |      |             |      |             |
|           | Apr 5 to Apr 11, 2021  | 16 | 0-0  | 0.00-0.00   | 0-3  | 0.00-15.79  |
|           | Apr 12 to Apr 18, 2021 | 22 | 0-3  | 0.00-15.79  | 0-0  | 0.00-0.00   |
|           | Apr 19 to Apr 25, 2021 | 17 | 0-0  | 0.00-0.00   | 0-1  | 0.00-5.56   |
|           | Apr 26 to May 2, 2021  | 17 | 0-0  | 0.00-0.00   | 0-1  | 0.00-5.56   |
|           | May 3 to May 9, 2021   | 23 | 0-7  | 0.00-43.75  | 0-0  | 0.00-0.00   |
|           | May 10 to May 16, 2021 | 19 | 0-3  | 0.00-18.75  | 0-0  | 0.00-0.00   |
|           | May 17 to May 23, 2021 | 23 | 0-8  | 0.00-53.33  | 0-0  | 0.00-0.00   |
|           | May 24 to May 30, 2021 | 11 | 0-0  | 0.00-0.00   | 0-4  | 0.00-26.67  |
| Okayama   |                        |    |      |             |      |             |
|           | Apr 5 to Apr 11, 2021  | 37 | 0-0  | 0.00-0.00   | 2-16 | 3.77-30.19  |
|           | Apr 12 to Apr 18, 2021 | 52 | 0-0  | 0.00-0.00   | 0-0  | 0.00-0.00   |
|           | Apr 19 to Apr 25, 2021 | 53 | 0-2  | 0.00-3.92   | 0-0  | 0.00-0.00   |
|           | Apr 26 to May 2, 2021  | 53 | 0-1  | 0.00-1.92   | 0-0  | 0.00-0.00   |
|           | May 3 to May 9, 2021   | 58 | 0-8  | 0.00-16.00  | 0-0  | 0.00-0.00   |
|           | May 10 to May 16, 2021 | 59 | 0-10 | 0.00-20.41  | 0-0  | 0.00-0.00   |
|           | May 17 to May 23, 2021 | 39 | 0-0  | 0.00-0.00   | 0-9  | 0.00-18.75  |
|           | May 24 to May 30, 2021 | 46 | 0-1  | 0.00-2.22   | 0-0  | 0.00-0.00   |
| Hiroshima |                        |    |      |             |      |             |
|           | Apr 5 to Apr 11, 2021  | 61 | 0-0  | 0.00-0.00   | 0-4  | 0.00-6.15   |
|           | Apr 12 to Apr 18, 2021 | 67 | 0-4  | 0.00-6.35   | 0-0  | 0.00-0.00   |
|           | Apr 19 to Apr 25, 2021 | 71 | 0-9  | 0.00-14.52  | 0-0  | 0.00-0.00   |
|           | Apr 26 to May 2, 2021  | 81 | 2-19 | 3.23-30.65  | 0-0  | 0.00-0.00   |
|           | May 3 to May 9, 2021   | 68 | 0-8  | 0.00-13.33  | 0-0  | 0.00-0.00   |
|           | May 10 to May 16, 2021 | 72 | 0-13 | 0.00-22.03  | 0-0  | 0.00-0.00   |
|           | May 17 to May 23, 2021 | 81 | 9-24 | 15.79-42.11 | 0-0  | 0.00-0.00   |
|           | May 24 to May 30, 2021 | 54 | 0-0  | 0.00-0.00   | 0-2  | 0.00-3.57   |
| Yamaguchi |                        |    |      |             |      |             |
|           | Apr 5 to Apr 11, 2021  | 47 | 0-5  | 0.00-11.90  | 0-0  | 0.00-0.00   |
|           | Apr 12 to Apr 18, 2021 | 41 | 0-0  | 0.00-0.00   | 0-0  | 0.00-0.00   |

|           |                        |     |       |             |      |            |
|-----------|------------------------|-----|-------|-------------|------|------------|
|           | Apr 19 to Apr 25, 2021 | 49  | 0-9   | 0.00-22.50  | 0-0  | 0.00-0.00  |
|           | Apr 26 to May 2, 2021  | 65  | 11-25 | 27.50-62.50 | 0-0  | 0.00-0.00  |
|           | May 3 to May 9, 2021   | 42  | 0-3   | 0.00-7.69   | 0-0  | 0.00-0.00  |
|           | May 10 to May 16, 2021 | 39  | 0-0   | 0.00-0.00   | 0-0  | 0.00-0.00  |
|           | May 17 to May 23, 2021 | 48  | 0-9   | 0.00-23.08  | 0-0  | 0.00-0.00  |
|           | May 24 to May 30, 2021 | 39  | 0-1   | 0.00-2.63   | 0-0  | 0.00-0.00  |
| Tokushima |                        |     |       |             |      |            |
|           | Apr 5 to Apr 11, 2021  | 23  | 0-0   | 0.00-0.00   | 0-3  | 0.00-11.54 |
|           | Apr 12 to Apr 18, 2021 | 28  | 0-3   | 0.00-12.00  | 0-0  | 0.00-0.00  |
|           | Apr 19 to Apr 25, 2021 | 30  | 0-7   | 0.00-30.43  | 0-0  | 0.00-0.00  |
|           | Apr 26 to May 2, 2021  | 23  | 0-1   | 0.00-4.55   | 0-0  | 0.00-0.00  |
|           | May 3 to May 9, 2021   | 24  | 0-2   | 0.00-9.09   | 0-0  | 0.00-0.00  |
|           | May 10 to May 16, 2021 | 27  | 0-6   | 0.00-28.57  | 0-0  | 0.00-0.00  |
|           | May 17 to May 23, 2021 | 24  | 0-3   | 0.00-14.29  | 0-0  | 0.00-0.00  |
|           | May 24 to May 30, 2021 | 26  | 0-5   | 0.00-23.81  | 0-0  | 0.00-0.00  |
| Kagawa    |                        |     |       |             |      |            |
|           | Apr 5 to Apr 11, 2021  | 24  | 0-0   | 0.00-0.00   | 0-4  | 0.00-14.29 |
|           | Apr 12 to Apr 18, 2021 | 28  | 0-0   | 0.00-0.00   | 0-0  | 0.00-0.00  |
|           | Apr 19 to Apr 25, 2021 | 20  | 0-0   | 0.00-0.00   | 0-7  | 0.00-25.93 |
|           | Apr 26 to May 2, 2021  | 25  | 0-0   | 0.00-0.00   | 0-1  | 0.00-3.85  |
|           | May 3 to May 9, 2021   | 26  | 0-0   | 0.00-0.00   | 0-0  | 0.00-0.00  |
|           | May 10 to May 16, 2021 | 28  | 0-4   | 0.00-16.67  | 0-0  | 0.00-0.00  |
|           | May 17 to May 23, 2021 | 23  | 0-0   | 0.00-0.00   | 0-2  | 0.00-8.00  |
|           | May 24 to May 30, 2021 | 27  | 0-4   | 0.00-17.39  | 0-0  | 0.00-0.00  |
| Ehime     |                        |     |       |             |      |            |
|           | Apr 5 to Apr 11, 2021  | 45  | 0-9   | 0.00-25.00  | 0-0  | 0.00-0.00  |
|           | Apr 12 to Apr 18, 2021 | 30  | 0-0   | 0.00-0.00   | 0-6  | 0.00-16.67 |
|           | Apr 19 to Apr 25, 2021 | 39  | 0-4   | 0.00-11.43  | 0-0  | 0.00-0.00  |
|           | Apr 26 to May 2, 2021  | 40  | 0-5   | 0.00-14.29  | 0-0  | 0.00-0.00  |
|           | May 3 to May 9, 2021   | 23  | 0-0   | 0.00-0.00   | 1-12 | 2.86-34.29 |
|           | May 10 to May 16, 2021 | 47  | 1-13  | 2.94-38.24  | 0-0  | 0.00-0.00  |
|           | May 17 to May 23, 2021 | 31  | 0-0   | 0.00-0.00   | 0-2  | 0.00-6.06  |
|           | May 24 to May 30, 2021 | 28  | 0-0   | 0.00-0.00   | 0-4  | 0.00-12.50 |
| Kochi     |                        |     |       |             |      |            |
|           | Apr 5 to Apr 11, 2021  | 26  | 0-1   | 0.00-4.00   | 0-0  | 0.00-0.00  |
|           | Apr 12 to Apr 18, 2021 | 22  | 0-0   | 0.00-0.00   | 0-3  | 0.00-12.00 |
|           | Apr 19 to Apr 25, 2021 | 17  | 0-0   | 0.00-0.00   | 0-7  | 0.00-29.17 |
|           | Apr 26 to May 2, 2021  | 14  | 0-0   | 0.00-0.00   | 0-9  | 0.00-39.13 |
|           | May 3 to May 9, 2021   | 20  | 0-0   | 0.00-0.00   | 0-2  | 0.00-9.09  |
|           | May 10 to May 16, 2021 | 32  | 0-10  | 0.00-45.45  | 0-0  | 0.00-0.00  |
|           | May 17 to May 23, 2021 | 28  | 0-7   | 0.00-33.33  | 0-0  | 0.00-0.00  |
|           | May 24 to May 30, 2021 | 23  | 0-3   | 0.00-15.00  | 0-0  | 0.00-0.00  |
| Fukuoka   |                        |     |       |             |      |            |
|           | Apr 5 to Apr 11, 2021  | 126 | 0-0   | 0.00-0.00   | 0-2  | 0.00-1.56  |
|           | Apr 12 to Apr 18, 2021 | 121 | 0-0   | 0.00-0.00   | 0-5  | 0.00-3.97  |
|           | Apr 19 to Apr 25, 2021 | 162 | 11-37 | 8.80-29.60  | 0-0  | 0.00-0.00  |

|          |                        |     |      |             |      |            |
|----------|------------------------|-----|------|-------------|------|------------|
|          | Apr 26 to May 2, 2021  | 124 | 0-2  | 0.00-1.64   | 0-0  | 0.00-0.00  |
|          | May 3 to May 9, 2021   | 141 | 0-22 | 0.00-18.49  | 0-0  | 0.00-0.00  |
|          | May 10 to May 16, 2021 | 135 | 0-17 | 0.00-14.41  | 0-0  | 0.00-0.00  |
|          | May 17 to May 23, 2021 | 135 | 0-18 | 0.00-15.38  | 0-0  | 0.00-0.00  |
|          | May 24 to May 30, 2021 | 132 | 0-19 | 0.00-16.81  | 0-0  | 0.00-0.00  |
| Saga     |                        |     |      |             |      |            |
|          | Apr 5 to Apr 11, 2021  | 27  | 0-2  | 0.00-8.00   | 0-0  | 0.00-0.00  |
|          | Apr 12 to Apr 18, 2021 | 30  | 0-6  | 0.00-25.00  | 0-0  | 0.00-0.00  |
|          | Apr 19 to Apr 25, 2021 | 26  | 0-2  | 0.00-8.33   | 0-0  | 0.00-0.00  |
|          | Apr 26 to May 2, 2021  | 30  | 0-7  | 0.00-30.43  | 0-0  | 0.00-0.00  |
|          | May 3 to May 9, 2021   | 18  | 0-0  | 0.00-0.00   | 0-5  | 0.00-21.74 |
|          | May 10 to May 16, 2021 | 36  | 4-14 | 18.18-63.64 | 0-0  | 0.00-0.00  |
|          | May 17 to May 23, 2021 | 23  | 0-1  | 0.00-4.55   | 0-0  | 0.00-0.00  |
|          | May 24 to May 30, 2021 | 19  | 0-0  | 0.00-0.00   | 0-2  | 0.00-9.52  |
| Nagasaki |                        |     |      |             |      |            |
|          | Apr 5 to Apr 11, 2021  | 39  | 0-0  | 0.00-0.00   | 0-4  | 0.00-9.30  |
|          | Apr 12 to Apr 18, 2021 | 39  | 0-0  | 0.00-0.00   | 0-3  | 0.00-7.14  |
|          | Apr 19 to Apr 25, 2021 | 41  | 0-1  | 0.00-2.50   | 0-0  | 0.00-0.00  |
|          | Apr 26 to May 2, 2021  | 40  | 0-0  | 0.00-0.00   | 0-0  | 0.00-0.00  |
|          | May 3 to May 9, 2021   | 48  | 0-10 | 0.00-26.32  | 0-0  | 0.00-0.00  |
|          | May 10 to May 16, 2021 | 44  | 0-6  | 0.00-15.79  | 0-0  | 0.00-0.00  |
|          | May 17 to May 23, 2021 | 32  | 0-0  | 0.00-0.00   | 0-5  | 0.00-13.51 |
|          | May 24 to May 30, 2021 | 45  | 0-10 | 0.00-28.57  | 0-0  | 0.00-0.00  |
| Kumamoto |                        |     |      |             |      |            |
|          | Apr 5 to Apr 11, 2021  | 36  | 0-0  | 0.00-0.00   | 1-15 | 1.96-29.41 |
|          | Apr 12 to Apr 18, 2021 | 53  | 0-2  | 0.00-3.92   | 0-0  | 0.00-0.00  |
|          | Apr 19 to Apr 25, 2021 | 57  | 0-7  | 0.00-14.00  | 0-0  | 0.00-0.00  |
|          | Apr 26 to May 2, 2021  | 53  | 0-4  | 0.00-8.16   | 0-0  | 0.00-0.00  |
|          | May 3 to May 9, 2021   | 52  | 0-4  | 0.00-8.33   | 0-0  | 0.00-0.00  |
|          | May 10 to May 16, 2021 | 55  | 0-8  | 0.00-17.02  | 0-0  | 0.00-0.00  |
|          | May 17 to May 23, 2021 | 57  | 0-11 | 0.00-23.91  | 0-0  | 0.00-0.00  |
|          | May 24 to May 30, 2021 | 45  | 0-0  | 0.00-0.00   | 0-0  | 0.00-0.00  |
| Oita     |                        |     |      |             |      |            |
|          | Apr 5 to Apr 11, 2021  | 32  | 0-0  | 0.00-0.00   | 0-0  | 0.00-0.00  |
|          | Apr 12 to Apr 18, 2021 | 40  | 0-9  | 0.00-29.03  | 0-0  | 0.00-0.00  |
|          | Apr 19 to Apr 25, 2021 | 37  | 0-6  | 0.00-19.35  | 0-0  | 0.00-0.00  |
|          | Apr 26 to May 2, 2021  | 34  | 0-4  | 0.00-13.33  | 0-0  | 0.00-0.00  |
|          | May 3 to May 9, 2021   | 33  | 0-3  | 0.00-10.00  | 0-0  | 0.00-0.00  |
|          | May 10 to May 16, 2021 | 37  | 0-7  | 0.00-23.33  | 0-0  | 0.00-0.00  |
|          | May 17 to May 23, 2021 | 23  | 0-0  | 0.00-0.00   | 0-6  | 0.00-20.69 |
|          | May 24 to May 30, 2021 | 23  | 0-0  | 0.00-0.00   | 0-4  | 0.00-14.81 |
| Miyazaki |                        |     |      |             |      |            |
|          | Apr 5 to Apr 11, 2021  | 20  | 0-0  | 0.00-0.00   | 0-10 | 0.00-33.33 |
|          | Apr 12 to Apr 18, 2021 | 31  | 0-1  | 0.00-3.33   | 0-0  | 0.00-0.00  |
|          | Apr 19 to Apr 25, 2021 | 37  | 0-7  | 0.00-23.33  | 0-0  | 0.00-0.00  |
|          | Apr 26 to May 2, 2021  | 36  | 0-6  | 0.00-20.00  | 0-0  | 0.00-0.00  |

|           |                        |    |     |            |      |            |
|-----------|------------------------|----|-----|------------|------|------------|
|           | May 3 to May 9, 2021   | 36 | 0-6 | 0.00-20.00 | 0-0  | 0.00-0.00  |
|           | May 10 to May 16, 2021 | 25 | 0-0 | 0.00-0.00  | 0-4  | 0.00-13.79 |
|           | May 17 to May 23, 2021 | 27 | 0-0 | 0.00-0.00  | 0-1  | 0.00-3.57  |
|           | May 24 to May 30, 2021 | 27 | 0-0 | 0.00-0.00  | 0-0  | 0.00-0.00  |
| Kagoshima |                        |    |     |            |      |            |
|           | Apr 5 to Apr 11, 2021  | 55 | 0-3 | 0.00-5.77  | 0-0  | 0.00-0.00  |
|           | Apr 12 to Apr 18, 2021 | 37 | 0-0 | 0.00-0.00  | 0-14 | 0.00-27.45 |
|           | Apr 19 to Apr 25, 2021 | 48 | 0-0 | 0.00-0.00  | 0-1  | 0.00-2.04  |
|           | Apr 26 to May 2, 2021  | 37 | 0-0 | 0.00-0.00  | 0-11 | 0.00-22.92 |
|           | May 3 to May 9, 2021   | 52 | 0-4 | 0.00-8.33  | 0-0  | 0.00-0.00  |
|           | May 10 to May 16, 2021 | 41 | 0-0 | 0.00-0.00  | 0-6  | 0.00-12.77 |
|           | May 17 to May 23, 2021 | 48 | 0-2 | 0.00-4.35  | 0-0  | 0.00-0.00  |
|           | May 24 to May 30, 2021 | 51 | 0-7 | 0.00-15.91 | 0-0  | 0.00-0.00  |
| Okinawa   |                        |    |     |            |      |            |
|           | Apr 5 to Apr 11, 2021  | 23 | 0-0 | 0.00-0.00  | 0-0  | 0.00-0.00  |
|           | Apr 12 to Apr 18, 2021 | 27 | 0-4 | 0.00-17.39 | 0-0  | 0.00-0.00  |
|           | Apr 19 to Apr 25, 2021 | 21 | 0-0 | 0.00-0.00  | 0-2  | 0.00-8.70  |
|           | Apr 26 to May 2, 2021  | 20 | 0-0 | 0.00-0.00  | 0-3  | 0.00-13.04 |
|           | May 3 to May 9, 2021   | 16 | 0-0 | 0.00-0.00  | 0-6  | 0.00-27.27 |
|           | May 10 to May 16, 2021 | 23 | 0-1 | 0.00-4.55  | 0-0  | 0.00-0.00  |
|           | May 17 to May 23, 2021 | 17 | 0-0 | 0.00-0.00  | 0-4  | 0.00-19.05 |
|           | May 24 to May 30, 2021 | 13 | 0-0 | 0.00-0.00  | 0-8  | 0.00-38.10 |

---



**Table A.7: Weekly number of observed and excess/exiguous deaths in Japan and 47 prefectures for respiratory disease-related deaths in nursing homes and elderly care facilities from January 2020 through May 2021.**

| Prefecture | Week                   | Observed | Excess deaths | Percent excess | Exiguous deaths | Percent exiguous |
|------------|------------------------|----------|---------------|----------------|-----------------|------------------|
| Japan      |                        |          |               |                |                 |                  |
|            | Apr 5 to Apr 11, 2021  | 265      | 0–0           | 0.00–0.00      | 0–4             | 0.00–1.49        |
|            | Apr 12 to Apr 18, 2021 | 286      | 0–17          | 0.00–6.32      | 0–0             | 0.00–0.00        |
|            | Apr 19 to Apr 25, 2021 | 295      | 0–27          | 0.00–10.07     | 0–0             | 0.00–0.00        |
|            | Apr 26 to May 2, 2021  | 306      | 0–41          | 0.00–15.47     | 0–0             | 0.00–0.00        |
|            | May 3 to May 9, 2021   | 345      | 36–81         | 13.64–30.68    | 0–0             | 0.00–0.00        |
|            | May 10 to May 16, 2021 | 393      | 87–131        | 33.21–50.00    | 0–0             | 0.00–0.00        |
|            | May 17 to May 23, 2021 | 360      | 61–104        | 23.83–40.63    | 0–0             | 0.00–0.00        |
|            | May 24 to May 30, 2021 | 330      | 34–78         | 13.49–30.95    | 0–0             | 0.00–0.00        |
| Hokkaido   |                        |          |               |                |                 |                  |
|            | Apr 5 to Apr 11, 2021  | 3        | 0–0           | 0.00–0.00      | 0–3             | 0.00–50.00       |
|            | Apr 12 to Apr 18, 2021 | 3        | 0–0           | 0.00–0.00      | 0–3             | 0.00–50.00       |
|            | Apr 19 to Apr 25, 2021 | 4        | 0–0           | 0.00–0.00      | 0–2             | 0.00–33.33       |
|            | Apr 26 to May 2, 2021  | 3        | 0–0           | 0.00–0.00      | 0–3             | 0.00–50.00       |
|            | May 3 to May 9, 2021   | 8        | 0–2           | 0.00–33.33     | 0–0             | 0.00–0.00        |
|            | May 10 to May 16, 2021 | 11       | 0–5           | 0.00–83.33     | 0–0             | 0.00–0.00        |
|            | May 17 to May 23, 2021 | 2        | 0–0           | 0.00–0.00      | 0–4             | 0.00–66.67       |
|            | May 24 to May 30, 2021 | 7        | 0–1           | 0.00–16.67     | 0–0             | 0.00–0.00        |
| Aomori     |                        |          |               |                |                 |                  |
|            | Apr 5 to Apr 11, 2021  | 4        | 0–0           | 0.00–0.00      | 0–1             | 0.00–20.00       |
|            | Apr 12 to Apr 18, 2021 | 4        | 0–0           | 0.00–0.00      | 0–2             | 0.00–33.33       |
|            | Apr 19 to Apr 25, 2021 | 4        | 0–0           | 0.00–0.00      | 0–2             | 0.00–33.33       |
|            | Apr 26 to May 2, 2021  | 1        | 0–0           | 0.00–0.00      | 0–4             | 0.00–80.00       |
|            | May 3 to May 9, 2021   | 6        | 0–1           | 0.00–20.00     | 0–0             | 0.00–0.00        |
|            | May 10 to May 16, 2021 | 8        | 0–3           | 0.00–60.00     | 0–0             | 0.00–0.00        |
|            | May 17 to May 23, 2021 | 8        | 0–4           | 0.00–100.00    | 0–0             | 0.00–0.00        |
|            | May 24 to May 30, 2021 | 6        | 0–2           | 0.00–50.00     | 0–0             | 0.00–0.00        |
| Iwate      |                        |          |               |                |                 |                  |
|            | Apr 5 to Apr 11, 2021  | 3        | 0–0           | 0.00–0.00      | 0–1             | 0.00–25.00       |
|            | Apr 12 to Apr 18, 2021 | 2        | 0–0           | 0.00–0.00      | 0–3             | 0.00–60.00       |
|            | Apr 19 to Apr 25, 2021 | 0        | 0–0           | 0.00–0.00      | 1–4             | 25.00–100.00     |
|            | Apr 26 to May 2, 2021  | 0        | 0–0           | 0.00–0.00      | 1–4             | 25.00–100.00     |
|            | May 3 to May 9, 2021   | 3        | 0–0           | 0.00–0.00      | 0–1             | 0.00–25.00       |
|            | May 10 to May 16, 2021 | 6        | 0–2           | 0.00–50.00     | 0–0             | 0.00–0.00        |
|            | May 17 to May 23, 2021 | 7        | 0–3           | 0.00–75.00     | 0–0             | 0.00–0.00        |
|            | May 24 to May 30, 2021 | 3        | 0–0           | 0.00–0.00      | 0–1             | 0.00–25.00       |
| Miyagi     |                        |          |               |                |                 |                  |
|            | Apr 5 to Apr 11, 2021  | 4        | 0–0           | 0.00–0.00      | 0–0             | 0.00–0.00        |
|            | Apr 12 to Apr 18, 2021 | 8        | 0–4           | 0.00–100.00    | 0–0             | 0.00–0.00        |
|            | Apr 19 to Apr 25, 2021 | 6        | 0–2           | 0.00–50.00     | 0–0             | 0.00–0.00        |
|            | Apr 26 to May 2, 2021  | 3        | 0–0           | 0.00–0.00      | 0–1             | 0.00–25.00       |

|           |                        |   |     |             |     |              |
|-----------|------------------------|---|-----|-------------|-----|--------------|
|           | May 3 to May 9, 2021   | 8 | 0-3 | 0.00-60.00  | 0-0 | 0.00-0.00    |
|           | May 10 to May 16, 2021 | 2 | 0-0 | 0.00-0.00   | 0-2 | 0.00-50.00   |
|           | May 17 to May 23, 2021 | 7 | 0-3 | 0.00-75.00  | 0-0 | 0.00-0.00    |
|           | May 24 to May 30, 2021 | 3 | 0-0 | 0.00-0.00   | 0-1 | 0.00-25.00   |
| Akita     |                        |   |     |             |     |              |
|           | Apr 5 to Apr 11, 2021  | 0 | 0-0 | 0.00-0.00   | 0-2 | 0.00-100.00  |
|           | Apr 12 to Apr 18, 2021 | 2 | 0-0 | 0.00-0.00   | 0-0 | 0.00-0.00    |
|           | Apr 19 to Apr 25, 2021 | 1 | 0-0 | 0.00-0.00   | 0-2 | 0.00-66.67   |
|           | Apr 26 to May 2, 2021  | 3 | 0-1 | 0.00-50.00  | 0-0 | 0.00-0.00    |
|           | May 3 to May 9, 2021   | 2 | 0-0 | 0.00-0.00   | 0-0 | 0.00-0.00    |
|           | May 10 to May 16, 2021 | 2 | 0-0 | 0.00-0.00   | 0-0 | 0.00-0.00    |
|           | May 17 to May 23, 2021 | 2 | 0-0 | 0.00-0.00   | 0-0 | 0.00-0.00    |
|           | May 24 to May 30, 2021 | 1 | 0-0 | 0.00-0.00   | 0-1 | 0.00-50.00   |
| Yamagata  |                        |   |     |             |     |              |
|           | Apr 5 to Apr 11, 2021  | 4 | 0-1 | 0.00-33.33  | 0-0 | 0.00-0.00    |
|           | Apr 12 to Apr 18, 2021 | 2 | 0-0 | 0.00-0.00   | 0-2 | 0.00-50.00   |
|           | Apr 19 to Apr 25, 2021 | 8 | 0-4 | 0.00-100.00 | 0-0 | 0.00-0.00    |
|           | Apr 26 to May 2, 2021  | 1 | 0-0 | 0.00-0.00   | 0-3 | 0.00-75.00   |
|           | May 3 to May 9, 2021   | 8 | 0-4 | 0.00-100.00 | 0-0 | 0.00-0.00    |
|           | May 10 to May 16, 2021 | 6 | 0-2 | 0.00-50.00  | 0-0 | 0.00-0.00    |
|           | May 17 to May 23, 2021 | 7 | 0-3 | 0.00-75.00  | 0-0 | 0.00-0.00    |
|           | May 24 to May 30, 2021 | 2 | 0-0 | 0.00-0.00   | 0-1 | 0.00-33.33   |
| Fukushima |                        |   |     |             |     |              |
|           | Apr 5 to Apr 11, 2021  | 3 | 0-0 | 0.00-0.00   | 0-1 | 0.00-25.00   |
|           | Apr 12 to Apr 18, 2021 | 6 | 0-2 | 0.00-50.00  | 0-0 | 0.00-0.00    |
|           | Apr 19 to Apr 25, 2021 | 0 | 0-0 | 0.00-0.00   | 1-4 | 25.00-100.00 |
|           | Apr 26 to May 2, 2021  | 4 | 0-0 | 0.00-0.00   | 0-0 | 0.00-0.00    |
|           | May 3 to May 9, 2021   | 5 | 0-1 | 0.00-25.00  | 0-0 | 0.00-0.00    |
|           | May 10 to May 16, 2021 | 7 | 0-3 | 0.00-75.00  | 0-0 | 0.00-0.00    |
|           | May 17 to May 23, 2021 | 6 | 0-2 | 0.00-50.00  | 0-0 | 0.00-0.00    |
|           | May 24 to May 30, 2021 | 6 | 0-2 | 0.00-50.00  | 0-0 | 0.00-0.00    |
| Ibaraki   |                        |   |     |             |     |              |
|           | Apr 5 to Apr 11, 2021  | 3 | 0-0 | 0.00-0.00   | 0-3 | 0.00-50.00   |
|           | Apr 12 to Apr 18, 2021 | 8 | 0-2 | 0.00-33.33  | 0-0 | 0.00-0.00    |
|           | Apr 19 to Apr 25, 2021 | 5 | 0-0 | 0.00-0.00   | 0-1 | 0.00-16.67   |
|           | Apr 26 to May 2, 2021  | 8 | 0-3 | 0.00-60.00  | 0-0 | 0.00-0.00    |
|           | May 3 to May 9, 2021   | 7 | 0-2 | 0.00-40.00  | 0-0 | 0.00-0.00    |
|           | May 10 to May 16, 2021 | 4 | 0-0 | 0.00-0.00   | 0-1 | 0.00-20.00   |
|           | May 17 to May 23, 2021 | 8 | 0-3 | 0.00-60.00  | 0-0 | 0.00-0.00    |
|           | May 24 to May 30, 2021 | 2 | 0-0 | 0.00-0.00   | 0-3 | 0.00-60.00   |
| Tochigi   |                        |   |     |             |     |              |
|           | Apr 5 to Apr 11, 2021  | 3 | 0-0 | 0.00-0.00   | 0-2 | 0.00-40.00   |
|           | Apr 12 to Apr 18, 2021 | 4 | 0-0 | 0.00-0.00   | 0-1 | 0.00-20.00   |
|           | Apr 19 to Apr 25, 2021 | 5 | 0-0 | 0.00-0.00   | 0-0 | 0.00-0.00    |
|           | Apr 26 to May 2, 2021  | 8 | 0-3 | 0.00-60.00  | 0-0 | 0.00-0.00    |
|           | May 3 to May 9, 2021   | 4 | 0-0 | 0.00-0.00   | 0-0 | 0.00-0.00    |

|          |                        |    |      |               |     |            |
|----------|------------------------|----|------|---------------|-----|------------|
|          | May 10 to May 16, 2021 | 9  | 1-5  | 25.00-125.00  | 0-0 | 0.00-0.00  |
|          | May 17 to May 23, 2021 | 5  | 0-1  | 0.00-25.00    | 0-0 | 0.00-0.00  |
|          | May 24 to May 30, 2021 | 4  | 0-0  | 0.00-0.00     | 0-0 | 0.00-0.00  |
| Gunma    |                        |    |      |               |     |            |
|          | Apr 5 to Apr 11, 2021  | 8  | 0-3  | 0.00-60.00    | 0-0 | 0.00-0.00  |
|          | Apr 12 to Apr 18, 2021 | 8  | 0-3  | 0.00-60.00    | 0-0 | 0.00-0.00  |
|          | Apr 19 to Apr 25, 2021 | 11 | 1-5  | 16.67-83.33   | 0-0 | 0.00-0.00  |
|          | Apr 26 to May 2, 2021  | 8  | 0-2  | 0.00-33.33    | 0-0 | 0.00-0.00  |
|          | May 3 to May 9, 2021   | 3  | 0-0  | 0.00-0.00     | 0-3 | 0.00-50.00 |
|          | May 10 to May 16, 2021 | 16 | 6-10 | 100.00-166.67 | 0-0 | 0.00-0.00  |
|          | May 17 to May 23, 2021 | 4  | 0-0  | 0.00-0.00     | 0-1 | 0.00-20.00 |
|          | May 24 to May 30, 2021 | 12 | 2-7  | 40.00-140.00  | 0-0 | 0.00-0.00  |
| Saitama  |                        |    |      |               |     |            |
|          | Apr 5 to Apr 11, 2021  | 8  | 0-0  | 0.00-0.00     | 0-4 | 0.00-33.33 |
|          | Apr 12 to Apr 18, 2021 | 9  | 0-0  | 0.00-0.00     | 0-2 | 0.00-18.18 |
|          | Apr 19 to Apr 25, 2021 | 12 | 0-0  | 0.00-0.00     | 0-0 | 0.00-0.00  |
|          | Apr 26 to May 2, 2021  | 12 | 0-0  | 0.00-0.00     | 0-0 | 0.00-0.00  |
|          | May 3 to May 9, 2021   | 18 | 0-7  | 0.00-63.64    | 0-0 | 0.00-0.00  |
|          | May 10 to May 16, 2021 | 11 | 0-0  | 0.00-0.00     | 0-0 | 0.00-0.00  |
|          | May 17 to May 23, 2021 | 9  | 0-0  | 0.00-0.00     | 0-1 | 0.00-10.00 |
|          | May 24 to May 30, 2021 | 12 | 0-2  | 0.00-20.00    | 0-0 | 0.00-0.00  |
| Chiba    |                        |    |      |               |     |            |
|          | Apr 5 to Apr 11, 2021  | 11 | 0-1  | 0.00-10.00    | 0-0 | 0.00-0.00  |
|          | Apr 12 to Apr 18, 2021 | 12 | 0-2  | 0.00-20.00    | 0-0 | 0.00-0.00  |
|          | Apr 19 to Apr 25, 2021 | 7  | 0-0  | 0.00-0.00     | 0-3 | 0.00-30.00 |
|          | Apr 26 to May 2, 2021  | 9  | 0-0  | 0.00-0.00     | 0-1 | 0.00-10.00 |
|          | May 3 to May 9, 2021   | 14 | 0-4  | 0.00-40.00    | 0-0 | 0.00-0.00  |
|          | May 10 to May 16, 2021 | 11 | 0-1  | 0.00-10.00    | 0-0 | 0.00-0.00  |
|          | May 17 to May 23, 2021 | 8  | 0-0  | 0.00-0.00     | 0-1 | 0.00-11.11 |
|          | May 24 to May 30, 2021 | 9  | 0-0  | 0.00-0.00     | 0-0 | 0.00-0.00  |
| Tokyo    |                        |    |      |               |     |            |
|          | Apr 5 to Apr 11, 2021  | 17 | 0-0  | 0.00-0.00     | 0-5 | 0.00-22.73 |
|          | Apr 12 to Apr 18, 2021 | 27 | 0-5  | 0.00-22.73    | 0-0 | 0.00-0.00  |
|          | Apr 19 to Apr 25, 2021 | 19 | 0-0  | 0.00-0.00     | 0-3 | 0.00-13.64 |
|          | Apr 26 to May 2, 2021  | 25 | 0-4  | 0.00-19.05    | 0-0 | 0.00-0.00  |
|          | May 3 to May 9, 2021   | 33 | 2-12 | 9.52-57.14    | 0-0 | 0.00-0.00  |
|          | May 10 to May 16, 2021 | 22 | 0-1  | 0.00-4.76     | 0-0 | 0.00-0.00  |
|          | May 17 to May 23, 2021 | 23 | 0-3  | 0.00-15.00    | 0-0 | 0.00-0.00  |
|          | May 24 to May 30, 2021 | 21 | 0-1  | 0.00-5.00     | 0-0 | 0.00-0.00  |
| Kanagawa |                        |    |      |               |     |            |
|          | Apr 5 to Apr 11, 2021  | 19 | 0-3  | 0.00-18.75    | 0-0 | 0.00-0.00  |
|          | Apr 12 to Apr 18, 2021 | 15 | 0-0  | 0.00-0.00     | 0-1 | 0.00-6.25  |
|          | Apr 19 to Apr 25, 2021 | 12 | 0-0  | 0.00-0.00     | 0-4 | 0.00-25.00 |
|          | Apr 26 to May 2, 2021  | 22 | 0-6  | 0.00-37.50    | 0-0 | 0.00-0.00  |
|          | May 3 to May 9, 2021   | 20 | 0-4  | 0.00-25.00    | 0-0 | 0.00-0.00  |
|          | May 10 to May 16, 2021 | 16 | 0-0  | 0.00-0.00     | 0-0 | 0.00-0.00  |

|           |                        |    |     |              |     |             |
|-----------|------------------------|----|-----|--------------|-----|-------------|
|           | May 17 to May 23, 2021 | 20 | 0-4 | 0.00-25.00   | 0-0 | 0.00-0.00   |
|           | May 24 to May 30, 2021 | 18 | 0-2 | 0.00-12.50   | 0-0 | 0.00-0.00   |
| Niigata   |                        |    |     |              |     |             |
|           | Apr 5 to Apr 11, 2021  | 8  | 0-3 | 0.00-60.00   | 0-0 | 0.00-0.00   |
|           | Apr 12 to Apr 18, 2021 | 3  | 0-0 | 0.00-0.00    | 0-2 | 0.00-40.00  |
|           | Apr 19 to Apr 25, 2021 | 7  | 0-2 | 0.00-40.00   | 0-0 | 0.00-0.00   |
|           | Apr 26 to May 2, 2021  | 5  | 0-0 | 0.00-0.00    | 0-0 | 0.00-0.00   |
|           | May 3 to May 9, 2021   | 9  | 0-4 | 0.00-80.00   | 0-0 | 0.00-0.00   |
|           | May 10 to May 16, 2021 | 7  | 0-2 | 0.00-40.00   | 0-0 | 0.00-0.00   |
|           | May 17 to May 23, 2021 | 5  | 0-0 | 0.00-0.00    | 0-0 | 0.00-0.00   |
|           | May 24 to May 30, 2021 | 5  | 0-0 | 0.00-0.00    | 0-0 | 0.00-0.00   |
| Toyama    |                        |    |     |              |     |             |
|           | Apr 5 to Apr 11, 2021  | 2  | 0-0 | 0.00-0.00    | 0-2 | 0.00-50.00  |
|           | Apr 12 to Apr 18, 2021 | 4  | 0-1 | 0.00-33.33   | 0-0 | 0.00-0.00   |
|           | Apr 19 to Apr 25, 2021 | 4  | 0-1 | 0.00-33.33   | 0-0 | 0.00-0.00   |
|           | Apr 26 to May 2, 2021  | 3  | 0-0 | 0.00-0.00    | 0-0 | 0.00-0.00   |
|           | May 3 to May 9, 2021   | 4  | 0-1 | 0.00-33.33   | 0-0 | 0.00-0.00   |
|           | May 10 to May 16, 2021 | 3  | 0-0 | 0.00-0.00    | 0-0 | 0.00-0.00   |
|           | May 17 to May 23, 2021 | 2  | 0-0 | 0.00-0.00    | 0-1 | 0.00-33.33  |
|           | May 24 to May 30, 2021 | 2  | 0-0 | 0.00-0.00    | 0-1 | 0.00-33.33  |
| Ishikawa  |                        |    |     |              |     |             |
|           | Apr 5 to Apr 11, 2021  | 1  | 0-0 | 0.00-0.00    | 0-3 | 0.00-75.00  |
|           | Apr 12 to Apr 18, 2021 | 6  | 0-2 | 0.00-50.00   | 0-0 | 0.00-0.00   |
|           | Apr 19 to Apr 25, 2021 | 5  | 0-1 | 0.00-25.00   | 0-0 | 0.00-0.00   |
|           | Apr 26 to May 2, 2021  | 4  | 0-0 | 0.00-0.00    | 0-0 | 0.00-0.00   |
|           | May 3 to May 9, 2021   | 4  | 0-0 | 0.00-0.00    | 0-0 | 0.00-0.00   |
|           | May 10 to May 16, 2021 | 5  | 0-1 | 0.00-25.00   | 0-0 | 0.00-0.00   |
|           | May 17 to May 23, 2021 | 3  | 0-0 | 0.00-0.00    | 0-0 | 0.00-0.00   |
|           | May 24 to May 30, 2021 | 1  | 0-0 | 0.00-0.00    | 0-2 | 0.00-66.67  |
| Fukui     |                        |    |     |              |     |             |
|           | Apr 5 to Apr 11, 2021  | 1  | 0-0 | 0.00-0.00    | 0-3 | 0.00-75.00  |
|           | Apr 12 to Apr 18, 2021 | 4  | 0-0 | 0.00-0.00    | 0-0 | 0.00-0.00   |
|           | Apr 19 to Apr 25, 2021 | 2  | 0-0 | 0.00-0.00    | 0-2 | 0.00-50.00  |
|           | Apr 26 to May 2, 2021  | 3  | 0-0 | 0.00-0.00    | 0-0 | 0.00-0.00   |
|           | May 3 to May 9, 2021   | 4  | 0-1 | 0.00-33.33   | 0-0 | 0.00-0.00   |
|           | May 10 to May 16, 2021 | 5  | 0-2 | 0.00-66.67   | 0-0 | 0.00-0.00   |
|           | May 17 to May 23, 2021 | 2  | 0-0 | 0.00-0.00    | 0-1 | 0.00-33.33  |
|           | May 24 to May 30, 2021 | 6  | 0-3 | 0.00-100.00  | 0-0 | 0.00-0.00   |
| Yamanashi |                        |    |     |              |     |             |
|           | Apr 5 to Apr 11, 2021  | 1  | NA  | NA           | NA  | NA          |
|           | Apr 12 to Apr 18, 2021 | 1  | NA  | NA           | NA  | NA          |
|           | Apr 19 to Apr 25, 2021 | 2  | NA  | NA           | NA  | NA          |
|           | Apr 26 to May 2, 2021  | 5  | 0-3 | 0.00-150.00  | 0-0 | 0.00-0.00   |
|           | May 3 to May 9, 2021   | 2  | 0-0 | 0.00-0.00    | 0-0 | 0.00-0.00   |
|           | May 10 to May 16, 2021 | 0  | 0-0 | 0.00-0.00    | 0-2 | 0.00-100.00 |
|           | May 17 to May 23, 2021 | 6  | 1-4 | 50.00-200.00 | 0-0 | 0.00-0.00   |

|                        |                        |     |           |              |           |            |
|------------------------|------------------------|-----|-----------|--------------|-----------|------------|
| Nagano                 | May 24 to May 30, 2021 | 2   | 0-0       | 0.00-0.00    | 0-0       | 0.00-0.00  |
|                        | Apr 5 to Apr 11, 2021  | 8   | 0-2       | 0.00-33.33   | 0-0       | 0.00-0.00  |
|                        | Apr 12 to Apr 18, 2021 | 7   | 0-1       | 0.00-16.67   | 0-0       | 0.00-0.00  |
|                        | Apr 19 to Apr 25, 2021 | 4   | 0-0       | 0.00-0.00    | 0-2       | 0.00-33.33 |
|                        | Apr 26 to May 2, 2021  | 7   | 0-2       | 0.00-40.00   | 0-0       | 0.00-0.00  |
|                        | May 3 to May 9, 2021   | 6   | 0-1       | 0.00-20.00   | 0-0       | 0.00-0.00  |
|                        | May 10 to May 16, 2021 | 5   | 0-0       | 0.00-0.00    | 0-0       | 0.00-0.00  |
|                        | May 17 to May 23, 2021 | 11  | 1-6       | 20.00-120.00 | 0-0       | 0.00-0.00  |
| Gifu                   | May 24 to May 30, 2021 | 7   | 0-2       | 0.00-40.00   | 0-0       | 0.00-0.00  |
|                        | Apr 5 to Apr 11, 2021  | 6   | 0-0       | 0.00-0.00    | 0-0       | 0.00-0.00  |
|                        | Apr 12 to Apr 18, 2021 | 5   | 0-0       | 0.00-0.00    | 0-1       | 0.00-16.67 |
|                        | Apr 19 to Apr 25, 2021 | 5   | 0-0       | 0.00-0.00    | 0-1       | 0.00-16.67 |
|                        | Apr 26 to May 2, 2021  | 5   | 0-0       | 0.00-0.00    | 0-1       | 0.00-16.67 |
|                        | May 3 to May 9, 2021   | 11  | 0-5       | 0.00-83.33   | 0-0       | 0.00-0.00  |
|                        | May 10 to May 16, 2021 | 9   | 0-3       | 0.00-50.00   | 0-0       | 0.00-0.00  |
|                        | May 17 to May 23, 2021 | 6   | 0-0       | 0.00-0.00    | 0-0       | 0.00-0.00  |
| Shizuoka               | May 24 to May 30, 2021 | 6   | 0-0       | 0.00-0.00    | 0-0       | 0.00-0.00  |
|                        | Apr 5 to Apr 11, 2021  | 6   | 0-0       | 0.00-0.00    | 0-5       | 0.00-45.45 |
|                        | Apr 12 to Apr 18, 2021 | 12  | 0-0       | 0.00-0.00    | 0-0       | 0.00-0.00  |
|                        | Apr 19 to Apr 25, 2021 | 12  | 0-0       | 0.00-0.00    | 0-0       | 0.00-0.00  |
|                        | Apr 26 to May 2, 2021  | 12  | 0-1       | 0.00-9.09    | 0-0       | 0.00-0.00  |
|                        | May 3 to May 9, 2021   | 10  | 0-0       | 0.00-0.00    | 0-1       | 0.00-9.09  |
|                        | May 10 to May 16, 2021 | 15  | 0-4       | 0.00-36.36   | 0-0       | 0.00-0.00  |
|                        | May 17 to May 23, 2021 | 13  | 0-2       | 0.00-18.18   | 0-0       | 0.00-0.00  |
| Aichi                  | May 24 to May 30, 2021 | 15  | 0-4       | 0.00-36.36   | 0-0       | 0.00-0.00  |
|                        | Apr 5 to Apr 11, 2021  | 9   | 0-0       | 0.00-0.00    | 0-8       | 0.00-47.06 |
|                        | Apr 12 to Apr 18, 2021 | 15  | 0-0       | 0.00-0.00    | 0-2       | 0.00-11.76 |
|                        | Apr 19 to Apr 25, 2021 | 18  | 0-1       | 0.00-5.88    | 0-0       | 0.00-0.00  |
|                        | Apr 26 to May 2, 2021  | 16  | 0-0       | 0.00-0.00    | 0-1       | 0.00-5.88  |
|                        | May 3 to May 9, 2021   | 22  | 0-5       | 0.00-29.41   | 0-0       | 0.00-0.00  |
|                        | May 10 to May 16, 2021 | 25  | 1-9       | 6.25-56.25   | 0-0       | 0.00-0.00  |
|                        | May 17 to May 23, 2021 | 25  | 1-9       | 6.25-56.25   | 0-0       | 0.00-0.00  |
| Mie                    | May 24 to May 30, 2021 | 24  | 1-9       | 6.67-60.00   | 0-0       | 0.00-0.00  |
|                        | Apr 5 to Apr 11, 2021  | 9   | 0-3       | 0.00-50.00   | 0-0       | 0.00-0.00  |
|                        | Apr 12 to Apr 18, 2021 | 1   | 0-0       | 0.00-0.00    | 0-4       | 0.00-80.00 |
|                        | Apr 19 to Apr 25, 2021 | 4   | 0-0       | 0.00-0.00    | 0-1       | 0.00-20.00 |
|                        | Apr 26 to May 2, 2021  | 4   | 0-0       | 0.00-0.00    | 0-1       | 0.00-20.00 |
|                        | May 3 to May 9, 2021   | 7   | 0-2       | 0.00-40.00   | 0-0       | 0.00-0.00  |
|                        | May 10 to May 16, 2021 | 10  | 0-5       | 0.00-100.00  | 0-0       | 0.00-0.00  |
|                        | May 17 to May 23, 2021 | 10  | 0-5       | 0.00-100.00  | 0-0       | 0.00-0.00  |
| May 24 to May 30, 2021 | 5                      | 0-0 | 0.00-0.00 | 0-0          | 0.00-0.00 |            |

Shiga

|                        |   |     |              |     |            |
|------------------------|---|-----|--------------|-----|------------|
| Apr 5 to Apr 11, 2021  | 5 | 0-2 | 0.00-66.67   | 0-0 | 0.00-0.00  |
| Apr 12 to Apr 18, 2021 | 4 | 0-2 | 0.00-100.00  | 0-0 | 0.00-0.00  |
| Apr 19 to Apr 25, 2021 | 1 | 0-0 | 0.00-0.00    | 0-1 | 0.00-50.00 |
| Apr 26 to May 2, 2021  | 4 | 0-2 | 0.00-100.00  | 0-0 | 0.00-0.00  |
| May 3 to May 9, 2021   | 2 | 0-0 | 0.00-0.00    | 0-0 | 0.00-0.00  |
| May 10 to May 16, 2021 | 2 | 0-0 | 0.00-0.00    | 0-0 | 0.00-0.00  |
| May 17 to May 23, 2021 | 6 | 1-4 | 50.00-200.00 | 0-0 | 0.00-0.00  |
| May 24 to May 30, 2021 | 6 | 0-4 | 0.00-200.00  | 0-0 | 0.00-0.00  |

Kyoto

|                        |   |     |            |     |            |
|------------------------|---|-----|------------|-----|------------|
| Apr 5 to Apr 11, 2021  | 5 | 0-0 | 0.00-0.00  | 0-0 | 0.00-0.00  |
| Apr 12 to Apr 18, 2021 | 2 | 0-0 | 0.00-0.00  | 0-3 | 0.00-60.00 |
| Apr 19 to Apr 25, 2021 | 3 | 0-0 | 0.00-0.00  | 0-2 | 0.00-40.00 |
| Apr 26 to May 2, 2021  | 3 | 0-0 | 0.00-0.00  | 0-3 | 0.00-50.00 |
| May 3 to May 9, 2021   | 5 | 0-0 | 0.00-0.00  | 0-1 | 0.00-16.67 |
| May 10 to May 16, 2021 | 8 | 0-2 | 0.00-33.33 | 0-0 | 0.00-0.00  |
| May 17 to May 23, 2021 | 4 | 0-0 | 0.00-0.00  | 0-2 | 0.00-33.33 |
| May 24 to May 30, 2021 | 8 | 0-2 | 0.00-33.33 | 0-0 | 0.00-0.00  |

Osaka

|                        |    |      |             |     |            |
|------------------------|----|------|-------------|-----|------------|
| Apr 5 to Apr 11, 2021  | 18 | 0-0  | 0.00-0.00   | 0-1 | 0.00-5.26  |
| Apr 12 to Apr 18, 2021 | 18 | 0-0  | 0.00-0.00   | 0-0 | 0.00-0.00  |
| Apr 19 to Apr 25, 2021 | 21 | 0-3  | 0.00-16.67  | 0-0 | 0.00-0.00  |
| Apr 26 to May 2, 2021  | 17 | 0-0  | 0.00-0.00   | 0-2 | 0.00-10.53 |
| May 3 to May 9, 2021   | 19 | 0-1  | 0.00-5.56   | 0-0 | 0.00-0.00  |
| May 10 to May 16, 2021 | 33 | 6-15 | 33.33-83.33 | 0-0 | 0.00-0.00  |
| May 17 to May 23, 2021 | 24 | 0-6  | 0.00-33.33  | 0-0 | 0.00-0.00  |
| May 24 to May 30, 2021 | 22 | 0-5  | 0.00-29.41  | 0-0 | 0.00-0.00  |

Hyogo

|                        |    |     |             |     |            |
|------------------------|----|-----|-------------|-----|------------|
| Apr 5 to Apr 11, 2021  | 6  | 0-0 | 0.00-0.00   | 0-4 | 0.00-40.00 |
| Apr 12 to Apr 18, 2021 | 12 | 0-2 | 0.00-20.00  | 0-0 | 0.00-0.00  |
| Apr 19 to Apr 25, 2021 | 12 | 0-2 | 0.00-20.00  | 0-0 | 0.00-0.00  |
| Apr 26 to May 2, 2021  | 11 | 0-1 | 0.00-10.00  | 0-0 | 0.00-0.00  |
| May 3 to May 9, 2021   | 11 | 0-1 | 0.00-10.00  | 0-0 | 0.00-0.00  |
| May 10 to May 16, 2021 | 14 | 0-4 | 0.00-40.00  | 0-0 | 0.00-0.00  |
| May 17 to May 23, 2021 | 20 | 3-9 | 27.27-81.82 | 0-0 | 0.00-0.00  |
| May 24 to May 30, 2021 | 12 | 0-2 | 0.00-20.00  | 0-0 | 0.00-0.00  |

Nara

|                        |   |     |              |     |             |
|------------------------|---|-----|--------------|-----|-------------|
| Apr 5 to Apr 11, 2021  | 3 | 0-0 | 0.00-0.00    | 0-1 | 0.00-25.00  |
| Apr 12 to Apr 18, 2021 | 8 | 0-4 | 0.00-100.00  | 0-0 | 0.00-0.00   |
| Apr 19 to Apr 25, 2021 | 6 | 0-2 | 0.00-50.00   | 0-0 | 0.00-0.00   |
| Apr 26 to May 2, 2021  | 6 | 0-3 | 0.00-100.00  | 0-0 | 0.00-0.00   |
| May 3 to May 9, 2021   | 2 | 0-0 | 0.00-0.00    | 0-2 | 0.00-50.00  |
| May 10 to May 16, 2021 | 2 | 0-0 | 0.00-0.00    | 0-1 | 0.00-33.33  |
| May 17 to May 23, 2021 | 9 | 1-6 | 33.33-200.00 | 0-0 | 0.00-0.00   |
| May 24 to May 30, 2021 | 0 | 0-0 | 0.00-0.00    | 0-4 | 0.00-100.00 |

Wakayama

|           |                        |    |     |               |     |             |
|-----------|------------------------|----|-----|---------------|-----|-------------|
|           | Apr 5 to Apr 11, 2021  | 4  | 0-0 | 0.00-0.00     | 0-0 | 0.00-0.00   |
|           | Apr 12 to Apr 18, 2021 | 7  | 0-3 | 0.00-75.00    | 0-0 | 0.00-0.00   |
|           | Apr 19 to Apr 25, 2021 | 3  | 0-0 | 0.00-0.00     | 0-1 | 0.00-25.00  |
|           | Apr 26 to May 2, 2021  | 3  | 0-0 | 0.00-0.00     | 0-1 | 0.00-25.00  |
|           | May 3 to May 9, 2021   | 3  | 0-0 | 0.00-0.00     | 0-1 | 0.00-25.00  |
|           | May 10 to May 16, 2021 | 7  | 0-3 | 0.00-75.00    | 0-0 | 0.00-0.00   |
|           | May 17 to May 23, 2021 | 6  | 0-2 | 0.00-50.00    | 0-0 | 0.00-0.00   |
|           | May 24 to May 30, 2021 | 6  | 0-3 | 0.00-100.00   | 0-0 | 0.00-0.00   |
| Tottori   |                        |    |     |               |     |             |
|           | Apr 5 to Apr 11, 2021  | 5  | 0-3 | 0.00-150.00   | 0-0 | 0.00-0.00   |
|           | Apr 12 to Apr 18, 2021 | 2  | 0-0 | 0.00-0.00     | 0-1 | 0.00-33.33  |
|           | Apr 19 to Apr 25, 2021 | 0  | 0-0 | 0.00-0.00     | 0-3 | 0.00-100.00 |
|           | Apr 26 to May 2, 2021  | 0  | 0-0 | 0.00-0.00     | 0-3 | 0.00-100.00 |
|           | May 3 to May 9, 2021   | 2  | NA  | NA            | NA  | NA          |
|           | May 10 to May 16, 2021 | 9  | 3-6 | 100.00-200.00 | 0-0 | 0.00-0.00   |
|           | May 17 to May 23, 2021 | 4  | 0-1 | 0.00-33.33    | 0-0 | 0.00-0.00   |
|           | May 24 to May 30, 2021 | 2  | 0-0 | 0.00-0.00     | 0-0 | 0.00-0.00   |
| Shimane   |                        |    |     |               |     |             |
|           | Apr 5 to Apr 11, 2021  | 1  | 0-0 | 0.00-0.00     | 0-2 | 0.00-66.67  |
|           | Apr 12 to Apr 18, 2021 | 4  | 0-1 | 0.00-33.33    | 0-0 | 0.00-0.00   |
|           | Apr 19 to Apr 25, 2021 | 1  | 0-0 | 0.00-0.00     | 0-2 | 0.00-66.67  |
|           | Apr 26 to May 2, 2021  | 8  | 2-6 | 100.00-300.00 | 0-0 | 0.00-0.00   |
|           | May 3 to May 9, 2021   | 0  | 0-0 | 0.00-0.00     | 0-3 | 0.00-100.00 |
|           | May 10 to May 16, 2021 | 4  | 0-2 | 0.00-100.00   | 0-0 | 0.00-0.00   |
|           | May 17 to May 23, 2021 | 8  | 2-6 | 100.00-300.00 | 0-0 | 0.00-0.00   |
|           | May 24 to May 30, 2021 | 7  | 1-5 | 50.00-250.00  | 0-0 | 0.00-0.00   |
| Okayama   |                        |    |     |               |     |             |
|           | Apr 5 to Apr 11, 2021  | 5  | 0-0 | 0.00-0.00     | 0-1 | 0.00-16.67  |
|           | Apr 12 to Apr 18, 2021 | 3  | 0-0 | 0.00-0.00     | 0-3 | 0.00-50.00  |
|           | Apr 19 to Apr 25, 2021 | 8  | 0-2 | 0.00-33.33    | 0-0 | 0.00-0.00   |
|           | Apr 26 to May 2, 2021  | 5  | 0-0 | 0.00-0.00     | 0-1 | 0.00-16.67  |
|           | May 3 to May 9, 2021   | 2  | 0-0 | 0.00-0.00     | 0-4 | 0.00-66.67  |
|           | May 10 to May 16, 2021 | 9  | 0-3 | 0.00-50.00    | 0-0 | 0.00-0.00   |
|           | May 17 to May 23, 2021 | 4  | 0-0 | 0.00-0.00     | 0-2 | 0.00-33.33  |
|           | May 24 to May 30, 2021 | 5  | 0-0 | 0.00-0.00     | 0-1 | 0.00-16.67  |
| Hiroshima |                        |    |     |               |     |             |
|           | Apr 5 to Apr 11, 2021  | 8  | 0-0 | 0.00-0.00     | 0-0 | 0.00-0.00   |
|           | Apr 12 to Apr 18, 2021 | 3  | 0-0 | 0.00-0.00     | 0-5 | 0.00-62.50  |
|           | Apr 19 to Apr 25, 2021 | 8  | 0-0 | 0.00-0.00     | 0-0 | 0.00-0.00   |
|           | Apr 26 to May 2, 2021  | 7  | 0-0 | 0.00-0.00     | 0-1 | 0.00-12.50  |
|           | May 3 to May 9, 2021   | 7  | 0-0 | 0.00-0.00     | 0-0 | 0.00-0.00   |
|           | May 10 to May 16, 2021 | 7  | 0-0 | 0.00-0.00     | 0-0 | 0.00-0.00   |
|           | May 17 to May 23, 2021 | 12 | 1-6 | 16.67-100.00  | 0-0 | 0.00-0.00   |
|           | May 24 to May 30, 2021 | 8  | 0-2 | 0.00-33.33    | 0-0 | 0.00-0.00   |
| Yamaguchi |                        |    |     |               |     |             |
|           | Apr 5 to Apr 11, 2021  | 4  | 0-0 | 0.00-0.00     | 0-1 | 0.00-20.00  |

|           |                        |    |     |             |     |             |
|-----------|------------------------|----|-----|-------------|-----|-------------|
|           | Apr 12 to Apr 18, 2021 | 4  | 0-0 | 0.00-0.00   | 0-1 | 0.00-20.00  |
|           | Apr 19 to Apr 25, 2021 | 5  | 0-0 | 0.00-0.00   | 0-0 | 0.00-0.00   |
|           | Apr 26 to May 2, 2021  | 4  | 0-0 | 0.00-0.00   | 0-1 | 0.00-20.00  |
|           | May 3 to May 9, 2021   | 5  | 0-0 | 0.00-0.00   | 0-0 | 0.00-0.00   |
|           | May 10 to May 16, 2021 | 7  | 0-2 | 0.00-40.00  | 0-0 | 0.00-0.00   |
|           | May 17 to May 23, 2021 | 10 | 0-5 | 0.00-100.00 | 0-0 | 0.00-0.00   |
|           | May 24 to May 30, 2021 | 7  | 0-2 | 0.00-40.00  | 0-0 | 0.00-0.00   |
| Tokushima |                        |    |     |             |     |             |
|           | Apr 5 to Apr 11, 2021  | 3  | 0-0 | 0.00-0.00   | 0-2 | 0.00-40.00  |
|           | Apr 12 to Apr 18, 2021 | 5  | 0-1 | 0.00-25.00  | 0-0 | 0.00-0.00   |
|           | Apr 19 to Apr 25, 2021 | 5  | 0-1 | 0.00-25.00  | 0-0 | 0.00-0.00   |
|           | Apr 26 to May 2, 2021  | 4  | 0-0 | 0.00-0.00   | 0-0 | 0.00-0.00   |
|           | May 3 to May 9, 2021   | 5  | 0-0 | 0.00-0.00   | 0-0 | 0.00-0.00   |
|           | May 10 to May 16, 2021 | 6  | 0-1 | 0.00-20.00  | 0-0 | 0.00-0.00   |
|           | May 17 to May 23, 2021 | 4  | 0-0 | 0.00-0.00   | 0-1 | 0.00-20.00  |
|           | May 24 to May 30, 2021 | 5  | 0-0 | 0.00-0.00   | 0-0 | 0.00-0.00   |
| Kagawa    |                        |    |     |             |     |             |
|           | Apr 5 to Apr 11, 2021  | 8  | 0-3 | 0.00-60.00  | 0-0 | 0.00-0.00   |
|           | Apr 12 to Apr 18, 2021 | 6  | 0-1 | 0.00-20.00  | 0-0 | 0.00-0.00   |
|           | Apr 19 to Apr 25, 2021 | 5  | 0-0 | 0.00-0.00   | 0-0 | 0.00-0.00   |
|           | Apr 26 to May 2, 2021  | 7  | 0-2 | 0.00-40.00  | 0-0 | 0.00-0.00   |
|           | May 3 to May 9, 2021   | 5  | 0-0 | 0.00-0.00   | 0-0 | 0.00-0.00   |
|           | May 10 to May 16, 2021 | 8  | 0-3 | 0.00-60.00  | 0-0 | 0.00-0.00   |
|           | May 17 to May 23, 2021 | 7  | 0-2 | 0.00-40.00  | 0-0 | 0.00-0.00   |
|           | May 24 to May 30, 2021 | 4  | 0-0 | 0.00-0.00   | 0-1 | 0.00-20.00  |
| Ehime     |                        |    |     |             |     |             |
|           | Apr 5 to Apr 11, 2021  | 4  | 0-1 | 0.00-33.33  | 0-0 | 0.00-0.00   |
|           | Apr 12 to Apr 18, 2021 | 4  | 0-1 | 0.00-33.33  | 0-0 | 0.00-0.00   |
|           | Apr 19 to Apr 25, 2021 | 3  | 0-0 | 0.00-0.00   | 0-0 | 0.00-0.00   |
|           | Apr 26 to May 2, 2021  | 6  | 0-3 | 0.00-100.00 | 0-0 | 0.00-0.00   |
|           | May 3 to May 9, 2021   | 7  | 0-4 | 0.00-133.33 | 0-0 | 0.00-0.00   |
|           | May 10 to May 16, 2021 | 7  | 0-4 | 0.00-133.33 | 0-0 | 0.00-0.00   |
|           | May 17 to May 23, 2021 | 0  | 0-0 | 0.00-0.00   | 0-3 | 0.00-100.00 |
|           | May 24 to May 30, 2021 | 4  | 0-1 | 0.00-33.33  | 0-0 | 0.00-0.00   |
| Kochi     |                        |    |     |             |     |             |
|           | Apr 5 to Apr 11, 2021  | 5  | 0-3 | 0.00-150.00 | 0-0 | 0.00-0.00   |
|           | Apr 12 to Apr 18, 2021 | 4  | 0-2 | 0.00-100.00 | 0-0 | 0.00-0.00   |
|           | Apr 19 to Apr 25, 2021 | 2  | 0-0 | 0.00-0.00   | 0-0 | 0.00-0.00   |
|           | Apr 26 to May 2, 2021  | 3  | 0-1 | 0.00-50.00  | 0-0 | 0.00-0.00   |
|           | May 3 to May 9, 2021   | 1  | 0-0 | 0.00-0.00   | 0-1 | 0.00-50.00  |
|           | May 10 to May 16, 2021 | 0  | 0-0 | 0.00-0.00   | 0-2 | 0.00-100.00 |
|           | May 17 to May 23, 2021 | 3  | 0-1 | 0.00-50.00  | 0-0 | 0.00-0.00   |
|           | May 24 to May 30, 2021 | 1  | 0-0 | 0.00-0.00   | 0-1 | 0.00-50.00  |
| Fukuoka   |                        |    |     |             |     |             |
|           | Apr 5 to Apr 11, 2021  | 12 | 0-3 | 0.00-33.33  | 0-0 | 0.00-0.00   |
|           | Apr 12 to Apr 18, 2021 | 9  | 0-0 | 0.00-0.00   | 0-0 | 0.00-0.00   |



|          |                        |    |      |              |     |            |
|----------|------------------------|----|------|--------------|-----|------------|
|          | Apr 19 to Apr 25, 2021 | 15 | 0-6  | 0.00-66.67   | 0-0 | 0.00-0.00  |
|          | Apr 26 to May 2, 2021  | 19 | 4-10 | 44.44-111.11 | 0-0 | 0.00-0.00  |
|          | May 3 to May 9, 2021   | 8  | 0-0  | 0.00-0.00    | 0-1 | 0.00-11.11 |
|          | May 10 to May 16, 2021 | 12 | 0-3  | 0.00-33.33   | 0-0 | 0.00-0.00  |
|          | May 17 to May 23, 2021 | 15 | 0-6  | 0.00-66.67   | 0-0 | 0.00-0.00  |
|          | May 24 to May 30, 2021 | 15 | 0-5  | 0.00-50.00   | 0-0 | 0.00-0.00  |
| Saga     |                        |    |      |              |     |            |
|          | Apr 5 to Apr 11, 2021  | 3  | 0-0  | 0.00-0.00    | 0-0 | 0.00-0.00  |
|          | Apr 12 to Apr 18, 2021 | 1  | 0-0  | 0.00-0.00    | 0-2 | 0.00-66.67 |
|          | Apr 19 to Apr 25, 2021 | 3  | 0-0  | 0.00-0.00    | 0-0 | 0.00-0.00  |
|          | Apr 26 to May 2, 2021  | 1  | 0-0  | 0.00-0.00    | 0-2 | 0.00-66.67 |
|          | May 3 to May 9, 2021   | 9  | 2-6  | 66.67-200.00 | 0-0 | 0.00-0.00  |
|          | May 10 to May 16, 2021 | 5  | 0-2  | 0.00-66.67   | 0-0 | 0.00-0.00  |
|          | May 17 to May 23, 2021 | 2  | 0-0  | 0.00-0.00    | 0-1 | 0.00-33.33 |
|          | May 24 to May 30, 2021 | 2  | 0-0  | 0.00-0.00    | 0-1 | 0.00-33.33 |
| Nagasaki |                        |    |      |              |     |            |
|          | Apr 5 to Apr 11, 2021  | 1  | 0-0  | 0.00-0.00    | 0-4 | 0.00-80.00 |
|          | Apr 12 to Apr 18, 2021 | 2  | 0-0  | 0.00-0.00    | 0-3 | 0.00-60.00 |
|          | Apr 19 to Apr 25, 2021 | 5  | 0-0  | 0.00-0.00    | 0-0 | 0.00-0.00  |
|          | Apr 26 to May 2, 2021  | 3  | 0-0  | 0.00-0.00    | 0-2 | 0.00-40.00 |
|          | May 3 to May 9, 2021   | 6  | 0-1  | 0.00-20.00   | 0-0 | 0.00-0.00  |
|          | May 10 to May 16, 2021 | 11 | 1-6  | 20.00-120.00 | 0-0 | 0.00-0.00  |
|          | May 17 to May 23, 2021 | 2  | 0-0  | 0.00-0.00    | 0-3 | 0.00-60.00 |
|          | May 24 to May 30, 2021 | 4  | 0-0  | 0.00-0.00    | 0-1 | 0.00-20.00 |
| Kumamoto |                        |    |      |              |     |            |
|          | Apr 5 to Apr 11, 2021  | 5  | 0-0  | 0.00-0.00    | 0-1 | 0.00-16.67 |
|          | Apr 12 to Apr 18, 2021 | 4  | 0-0  | 0.00-0.00    | 0-2 | 0.00-33.33 |
|          | Apr 19 to Apr 25, 2021 | 8  | 0-1  | 0.00-14.29   | 0-0 | 0.00-0.00  |
|          | Apr 26 to May 2, 2021  | 7  | 0-0  | 0.00-0.00    | 0-0 | 0.00-0.00  |
|          | May 3 to May 9, 2021   | 9  | 0-3  | 0.00-50.00   | 0-0 | 0.00-0.00  |
|          | May 10 to May 16, 2021 | 9  | 0-2  | 0.00-28.57   | 0-0 | 0.00-0.00  |
|          | May 17 to May 23, 2021 | 6  | 0-0  | 0.00-0.00    | 0-1 | 0.00-14.29 |
|          | May 24 to May 30, 2021 | 9  | 0-3  | 0.00-50.00   | 0-0 | 0.00-0.00  |
| Oita     |                        |    |      |              |     |            |
|          | Apr 5 to Apr 11, 2021  | 4  | 0-0  | 0.00-0.00    | 0-0 | 0.00-0.00  |
|          | Apr 12 to Apr 18, 2021 | 5  | 0-1  | 0.00-25.00   | 0-0 | 0.00-0.00  |
|          | Apr 19 to Apr 25, 2021 | 7  | 0-3  | 0.00-75.00   | 0-0 | 0.00-0.00  |
|          | Apr 26 to May 2, 2021  | 4  | 0-0  | 0.00-0.00    | 0-0 | 0.00-0.00  |
|          | May 3 to May 9, 2021   | 3  | 0-0  | 0.00-0.00    | 0-1 | 0.00-25.00 |
|          | May 10 to May 16, 2021 | 5  | 0-1  | 0.00-25.00   | 0-0 | 0.00-0.00  |
|          | May 17 to May 23, 2021 | 1  | 0-0  | 0.00-0.00    | 0-3 | 0.00-75.00 |
|          | May 24 to May 30, 2021 | 4  | 0-0  | 0.00-0.00    | 0-0 | 0.00-0.00  |
| Miyazaki |                        |    |      |              |     |            |
|          | Apr 5 to Apr 11, 2021  | 2  | 0-0  | 0.00-0.00    | 0-4 | 0.00-66.67 |
|          | Apr 12 to Apr 18, 2021 | 3  | 0-0  | 0.00-0.00    | 0-2 | 0.00-40.00 |
|          | Apr 19 to Apr 25, 2021 | 6  | 0-1  | 0.00-20.00   | 0-0 | 0.00-0.00  |

|           |                        |    |     |            |     |              |
|-----------|------------------------|----|-----|------------|-----|--------------|
|           | Apr 26 to May 2, 2021  | 7  | 0-2 | 0.00-40.00 | 0-0 | 0.00-0.00    |
|           | May 3 to May 9, 2021   | 8  | 0-3 | 0.00-60.00 | 0-0 | 0.00-0.00    |
|           | May 10 to May 16, 2021 | 6  | 0-0 | 0.00-0.00  | 0-0 | 0.00-0.00    |
|           | May 17 to May 23, 2021 | 6  | 0-0 | 0.00-0.00  | 0-0 | 0.00-0.00    |
|           | May 24 to May 30, 2021 | 6  | 0-1 | 0.00-20.00 | 0-0 | 0.00-0.00    |
| Kagoshima |                        |    |     |            |     |              |
|           | Apr 5 to Apr 11, 2021  | 9  | 0-2 | 0.00-28.57 | 0-0 | 0.00-0.00    |
|           | Apr 12 to Apr 18, 2021 | 8  | 0-1 | 0.00-14.29 | 0-0 | 0.00-0.00    |
|           | Apr 19 to Apr 25, 2021 | 10 | 0-4 | 0.00-66.67 | 0-0 | 0.00-0.00    |
|           | Apr 26 to May 2, 2021  | 5  | 0-0 | 0.00-0.00  | 0-2 | 0.00-28.57   |
|           | May 3 to May 9, 2021   | 5  | 0-0 | 0.00-0.00  | 0-2 | 0.00-28.57   |
|           | May 10 to May 16, 2021 | 5  | 0-0 | 0.00-0.00  | 0-2 | 0.00-28.57   |
|           | May 17 to May 23, 2021 | 6  | 0-0 | 0.00-0.00  | 0-1 | 0.00-14.29   |
|           | May 24 to May 30, 2021 | 11 | 0-5 | 0.00-83.33 | 0-0 | 0.00-0.00    |
| Okinawa   |                        |    |     |            |     |              |
|           | Apr 5 to Apr 11, 2021  | 4  | 0-0 | 0.00-0.00  | 0-0 | 0.00-0.00    |
|           | Apr 12 to Apr 18, 2021 | 0  | 0-0 | 0.00-0.00  | 1-4 | 25.00-100.00 |
|           | Apr 19 to Apr 25, 2021 | 1  | 0-0 | 0.00-0.00  | 0-3 | 0.00-75.00   |
|           | Apr 26 to May 2, 2021  | 1  | 0-0 | 0.00-0.00  | 0-3 | 0.00-75.00   |
|           | May 3 to May 9, 2021   | 3  | 0-0 | 0.00-0.00  | 0-1 | 0.00-25.00   |
|           | May 10 to May 16, 2021 | 2  | 0-0 | 0.00-0.00  | 0-2 | 0.00-50.00   |
|           | May 17 to May 23, 2021 | 2  | 0-0 | 0.00-0.00  | 0-2 | 0.00-50.00   |
|           | May 24 to May 30, 2021 | 3  | 0-0 | 0.00-0.00  | 0-0 | 0.00-0.00    |

---

**Table A.8: Weekly number of observed and excess/exiguous deaths in Japan and 47 prefectures for respiratory disease-related deaths at homes from January 2020 through May 2021.**

| Prefecture | Week                   | Observed | Excess deaths | Percent excess | Exiguous deaths | Percent exiguous |
|------------|------------------------|----------|---------------|----------------|-----------------|------------------|
| Japan      |                        |          |               |                |                 |                  |
|            | Apr 5 to Apr 11, 2021  | 199      | 0–25          | 0.00–14.37     | 0–0             | 0.00–0.00        |
|            | Apr 12 to Apr 18, 2021 | 222      | 13–50         | 7.56–29.07     | 0–0             | 0.00–0.00        |
|            | Apr 19 to Apr 25, 2021 | 220      | 8–46          | 4.60–26.44     | 0–0             | 0.00–0.00        |
|            | Apr 26 to May 2, 2021  | 218      | 11–47         | 6.43–27.49     | 0–0             | 0.00–0.00        |
|            | May 3 to May 9, 2021   | 238      | 36–69         | 21.30–40.83    | 0–0             | 0.00–0.00        |
|            | May 10 to May 16, 2021 | 240      | 42–77         | 25.77–47.24    | 0–0             | 0.00–0.00        |
|            | May 17 to May 23, 2021 | 237      | 42–77         | 26.25–48.13    | 0–0             | 0.00–0.00        |
|            | May 24 to May 30, 2021 | 228      | 33–69         | 20.75–43.40    | 0–0             | 0.00–0.00        |
| Hokkaido   |                        |          |               |                |                 |                  |
|            | Apr 5 to Apr 11, 2021  | 6        | 0–0           | 0.00–0.00      | 0–0             | 0.00–0.00        |
|            | Apr 12 to Apr 18, 2021 | 7        | 0–2           | 0.00–40.00     | 0–0             | 0.00–0.00        |
|            | Apr 19 to Apr 25, 2021 | 5        | 0–0           | 0.00–0.00      | 0–0             | 0.00–0.00        |
|            | Apr 26 to May 2, 2021  | 5        | 0–0           | 0.00–0.00      | 0–0             | 0.00–0.00        |
|            | May 3 to May 9, 2021   | 11       | 2–6           | 40.00–120.00   | 0–0             | 0.00–0.00        |
|            | May 10 to May 16, 2021 | 7        | 0–2           | 0.00–40.00     | 0–0             | 0.00–0.00        |
|            | May 17 to May 23, 2021 | 5        | 0–0           | 0.00–0.00      | 0–0             | 0.00–0.00        |
|            | May 24 to May 30, 2021 | 7        | 0–2           | 0.00–40.00     | 0–0             | 0.00–0.00        |
| Aomori     |                        |          |               |                |                 |                  |
|            | Apr 5 to Apr 11, 2021  | 2        | 0–0           | 0.00–0.00      | 0–1             | 0.00–33.33       |
|            | Apr 12 to Apr 18, 2021 | 1        | 0–0           | 0.00–0.00      | 0–2             | 0.00–66.67       |
|            | Apr 19 to Apr 25, 2021 | 2        | 0–0           | 0.00–0.00      | 0–1             | 0.00–33.33       |
|            | Apr 26 to May 2, 2021  | 6        | 0–3           | 0.00–100.00    | 0–0             | 0.00–0.00        |
|            | May 3 to May 9, 2021   | 3        | 0–0           | 0.00–0.00      | 0–0             | 0.00–0.00        |
|            | May 10 to May 16, 2021 | 5        | 0–2           | 0.00–66.67     | 0–0             | 0.00–0.00        |
|            | May 17 to May 23, 2021 | 5        | 0–2           | 0.00–66.67     | 0–0             | 0.00–0.00        |
|            | May 24 to May 30, 2021 | 0        | 0–0           | 0.00–0.00      | 0–3             | 0.00–100.00      |
| Iwate      |                        |          |               |                |                 |                  |
|            | Apr 5 to Apr 11, 2021  | 1        | 0–0           | 0.00–0.00      | 0–1             | 0.00–50.00       |
|            | Apr 12 to Apr 18, 2021 | 0        | NA            | NA             | NA              | NA               |
|            | Apr 19 to Apr 25, 2021 | 1        | NA            | NA             | NA              | NA               |
|            | Apr 26 to May 2, 2021  | 1        | NA            | NA             | NA              | NA               |
|            | May 3 to May 9, 2021   | 2        | NA            | NA             | NA              | NA               |
|            | May 10 to May 16, 2021 | 0        | NA            | NA             | NA              | NA               |
|            | May 17 to May 23, 2021 | 2        | 0–0           | 0.00–0.00      | 0–0             | 0.00–0.00        |
|            | May 24 to May 30, 2021 | 2        | 0–0           | 0.00–0.00      | 0–0             | 0.00–0.00        |
| Miyagi     |                        |          |               |                |                 |                  |
|            | Apr 5 to Apr 11, 2021  | 8        | 1–5           | 33.33–166.67   | 0–0             | 0.00–0.00        |
|            | Apr 12 to Apr 18, 2021 | 7        | 0–4           | 0.00–133.33    | 0–0             | 0.00–0.00        |
|            | Apr 19 to Apr 25, 2021 | 3        | 0–0           | 0.00–0.00      | 0–0             | 0.00–0.00        |
|            | Apr 26 to May 2, 2021  | 4        | 0–1           | 0.00–33.33     | 0–0             | 0.00–0.00        |
|            | May 3 to May 9, 2021   | 4        | 0–1           | 0.00–33.33     | 0–0             | 0.00–0.00        |

|           |                        |   |     |              |     |            |
|-----------|------------------------|---|-----|--------------|-----|------------|
|           | May 10 to May 16, 2021 | 4 | 0-1 | 0.00-33.33   | 0-0 | 0.00-0.00  |
|           | May 17 to May 23, 2021 | 6 | 0-3 | 0.00-100.00  | 0-0 | 0.00-0.00  |
|           | May 24 to May 30, 2021 | 4 | 0-1 | 0.00-33.33   | 0-0 | 0.00-0.00  |
| Akita     |                        |   |     |              |     |            |
|           | Apr 5 to Apr 11, 2021  | 0 | NA  | NA           | NA  | NA         |
|           | Apr 12 to Apr 18, 2021 | 2 | NA  | NA           | NA  | NA         |
|           | Apr 19 to Apr 25, 2021 | 0 | NA  | NA           | NA  | NA         |
|           | Apr 26 to May 2, 2021  | 0 | NA  | NA           | NA  | NA         |
|           | May 3 to May 9, 2021   | 2 | NA  | NA           | NA  | NA         |
|           | May 10 to May 16, 2021 | 2 | NA  | NA           | NA  | NA         |
|           | May 17 to May 23, 2021 | 0 | NA  | NA           | NA  | NA         |
|           | May 24 to May 30, 2021 | 0 | NA  | NA           | NA  | NA         |
| Yamagata  |                        |   |     |              |     |            |
|           | Apr 5 to Apr 11, 2021  | 0 | NA  | NA           | NA  | NA         |
|           | Apr 12 to Apr 18, 2021 | 0 | NA  | NA           | NA  | NA         |
|           | Apr 19 to Apr 25, 2021 | 2 | NA  | NA           | NA  | NA         |
|           | Apr 26 to May 2, 2021  | 0 | NA  | NA           | NA  | NA         |
|           | May 3 to May 9, 2021   | 2 | NA  | NA           | NA  | NA         |
|           | May 10 to May 16, 2021 | 0 | NA  | NA           | NA  | NA         |
|           | May 17 to May 23, 2021 | 2 | NA  | NA           | NA  | NA         |
|           | May 24 to May 30, 2021 | 4 | 0-2 | 0.00-100.00  | 0-0 | 0.00-0.00  |
| Fukushima |                        |   |     |              |     |            |
|           | Apr 5 to Apr 11, 2021  | 2 | 0-0 | 0.00-0.00    | 0-1 | 0.00-33.33 |
|           | Apr 12 to Apr 18, 2021 | 8 | 1-5 | 33.33-166.67 | 0-0 | 0.00-0.00  |
|           | Apr 19 to Apr 25, 2021 | 3 | 0-0 | 0.00-0.00    | 0-0 | 0.00-0.00  |
|           | Apr 26 to May 2, 2021  | 5 | 0-2 | 0.00-66.67   | 0-0 | 0.00-0.00  |
|           | May 3 to May 9, 2021   | 3 | 0-0 | 0.00-0.00    | 0-0 | 0.00-0.00  |
|           | May 10 to May 16, 2021 | 3 | 0-0 | 0.00-0.00    | 0-0 | 0.00-0.00  |
|           | May 17 to May 23, 2021 | 4 | 0-1 | 0.00-33.33   | 0-0 | 0.00-0.00  |
|           | May 24 to May 30, 2021 | 3 | 0-0 | 0.00-0.00    | 0-0 | 0.00-0.00  |
| Ibaraki   |                        |   |     |              |     |            |
|           | Apr 5 to Apr 11, 2021  | 4 | 0-0 | 0.00-0.00    | 0-0 | 0.00-0.00  |
|           | Apr 12 to Apr 18, 2021 | 2 | 0-0 | 0.00-0.00    | 0-2 | 0.00-50.00 |
|           | Apr 19 to Apr 25, 2021 | 7 | 0-3 | 0.00-75.00   | 0-0 | 0.00-0.00  |
|           | Apr 26 to May 2, 2021  | 4 | 0-0 | 0.00-0.00    | 0-0 | 0.00-0.00  |
|           | May 3 to May 9, 2021   | 3 | 0-0 | 0.00-0.00    | 0-1 | 0.00-25.00 |
|           | May 10 to May 16, 2021 | 6 | 0-2 | 0.00-50.00   | 0-0 | 0.00-0.00  |
|           | May 17 to May 23, 2021 | 4 | 0-1 | 0.00-33.33   | 0-0 | 0.00-0.00  |
|           | May 24 to May 30, 2021 | 3 | 0-0 | 0.00-0.00    | 0-0 | 0.00-0.00  |
| Tochigi   |                        |   |     |              |     |            |
|           | Apr 5 to Apr 11, 2021  | 3 | 0-0 | 0.00-0.00    | 0-0 | 0.00-0.00  |
|           | Apr 12 to Apr 18, 2021 | 3 | 0-1 | 0.00-50.00   | 0-0 | 0.00-0.00  |
|           | Apr 19 to Apr 25, 2021 | 5 | 0-3 | 0.00-150.00  | 0-0 | 0.00-0.00  |
|           | Apr 26 to May 2, 2021  | 5 | 0-3 | 0.00-150.00  | 0-0 | 0.00-0.00  |
|           | May 3 to May 9, 2021   | 2 | 0-0 | 0.00-0.00    | 0-0 | 0.00-0.00  |
|           | May 10 to May 16, 2021 | 2 | 0-0 | 0.00-0.00    | 0-0 | 0.00-0.00  |

|          |                        |    |      |              |     |             |
|----------|------------------------|----|------|--------------|-----|-------------|
|          | May 17 to May 23, 2021 | 0  | 0-0  | 0.00-0.00    | 0-2 | 0.00-100.00 |
|          | May 24 to May 30, 2021 | 7  | 1-5  | 50.00-250.00 | 0-0 | 0.00-0.00   |
| Gunma    |                        |    |      |              |     |             |
|          | Apr 5 to Apr 11, 2021  | 3  | 0-0  | 0.00-0.00    | 0-0 | 0.00-0.00   |
|          | Apr 12 to Apr 18, 2021 | 1  | 0-0  | 0.00-0.00    | 0-2 | 0.00-66.67  |
|          | Apr 19 to Apr 25, 2021 | 0  | 0-0  | 0.00-0.00    | 0-3 | 0.00-100.00 |
|          | Apr 26 to May 2, 2021  | 4  | 0-1  | 0.00-33.33   | 0-0 | 0.00-0.00   |
|          | May 3 to May 9, 2021   | 8  | 1-5  | 33.33-166.67 | 0-0 | 0.00-0.00   |
|          | May 10 to May 16, 2021 | 4  | 0-1  | 0.00-33.33   | 0-0 | 0.00-0.00   |
|          | May 17 to May 23, 2021 | 3  | 0-0  | 0.00-0.00    | 0-0 | 0.00-0.00   |
|          | May 24 to May 30, 2021 | 5  | 0-2  | 0.00-66.67   | 0-0 | 0.00-0.00   |
| Saitama  |                        |    |      |              |     |             |
|          | Apr 5 to Apr 11, 2021  | 12 | 0-3  | 0.00-33.33   | 0-0 | 0.00-0.00   |
|          | Apr 12 to Apr 18, 2021 | 12 | 0-3  | 0.00-33.33   | 0-0 | 0.00-0.00   |
|          | Apr 19 to Apr 25, 2021 | 8  | 0-0  | 0.00-0.00    | 0-1 | 0.00-11.11  |
|          | Apr 26 to May 2, 2021  | 16 | 1-7  | 11.11-77.78  | 0-0 | 0.00-0.00   |
|          | May 3 to May 9, 2021   | 12 | 0-3  | 0.00-33.33   | 0-0 | 0.00-0.00   |
|          | May 10 to May 16, 2021 | 7  | 0-0  | 0.00-0.00    | 0-1 | 0.00-12.50  |
|          | May 17 to May 23, 2021 | 14 | 0-6  | 0.00-75.00   | 0-0 | 0.00-0.00   |
|          | May 24 to May 30, 2021 | 14 | 0-6  | 0.00-75.00   | 0-0 | 0.00-0.00   |
| Chiba    |                        |    |      |              |     |             |
|          | Apr 5 to Apr 11, 2021  | 10 | 0-1  | 0.00-11.11   | 0-0 | 0.00-0.00   |
|          | Apr 12 to Apr 18, 2021 | 9  | 0-0  | 0.00-0.00    | 0-1 | 0.00-10.00  |
|          | Apr 19 to Apr 25, 2021 | 14 | 0-4  | 0.00-40.00   | 0-0 | 0.00-0.00   |
|          | Apr 26 to May 2, 2021  | 12 | 0-3  | 0.00-33.33   | 0-0 | 0.00-0.00   |
|          | May 3 to May 9, 2021   | 13 | 0-4  | 0.00-44.44   | 0-0 | 0.00-0.00   |
|          | May 10 to May 16, 2021 | 13 | 0-4  | 0.00-44.44   | 0-0 | 0.00-0.00   |
|          | May 17 to May 23, 2021 | 6  | 0-0  | 0.00-0.00    | 0-3 | 0.00-33.33  |
|          | May 24 to May 30, 2021 | 9  | 0-0  | 0.00-0.00    | 0-0 | 0.00-0.00   |
| Tokyo    |                        |    |      |              |     |             |
|          | Apr 5 to Apr 11, 2021  | 20 | 0-0  | 0.00-0.00    | 0-4 | 0.00-16.67  |
|          | Apr 12 to Apr 18, 2021 | 31 | 0-7  | 0.00-29.17   | 0-0 | 0.00-0.00   |
|          | Apr 19 to Apr 25, 2021 | 25 | 0-0  | 0.00-0.00    | 0-0 | 0.00-0.00   |
|          | Apr 26 to May 2, 2021  | 19 | 0-0  | 0.00-0.00    | 0-5 | 0.00-20.83  |
|          | May 3 to May 9, 2021   | 34 | 1-11 | 4.35-47.83   | 0-0 | 0.00-0.00   |
|          | May 10 to May 16, 2021 | 26 | 0-3  | 0.00-13.04   | 0-0 | 0.00-0.00   |
|          | May 17 to May 23, 2021 | 22 | 0-0  | 0.00-0.00    | 0-0 | 0.00-0.00   |
|          | May 24 to May 30, 2021 | 29 | 0-7  | 0.00-31.82   | 0-0 | 0.00-0.00   |
| Kanagawa |                        |    |      |              |     |             |
|          | Apr 5 to Apr 11, 2021  | 19 | 0-3  | 0.00-18.75   | 0-0 | 0.00-0.00   |
|          | Apr 12 to Apr 18, 2021 | 20 | 0-3  | 0.00-17.65   | 0-0 | 0.00-0.00   |
|          | Apr 19 to Apr 25, 2021 | 26 | 0-9  | 0.00-52.94   | 0-0 | 0.00-0.00   |
|          | Apr 26 to May 2, 2021  | 20 | 0-3  | 0.00-17.65   | 0-0 | 0.00-0.00   |
|          | May 3 to May 9, 2021   | 13 | 0-0  | 0.00-0.00    | 0-3 | 0.00-18.75  |
|          | May 10 to May 16, 2021 | 20 | 0-4  | 0.00-25.00   | 0-0 | 0.00-0.00   |
|          | May 17 to May 23, 2021 | 21 | 0-5  | 0.00-31.25   | 0-0 | 0.00-0.00   |

|                        |                        |     |             |             |           |             |
|------------------------|------------------------|-----|-------------|-------------|-----------|-------------|
| Niigata                | May 24 to May 30, 2021 | 19  | 0-4         | 0.00-26.67  | 0-0       | 0.00-0.00   |
|                        | Apr 5 to Apr 11, 2021  | 2   | 0-0         | 0.00-0.00   | 0-1       | 0.00-33.33  |
|                        | Apr 12 to Apr 18, 2021 | 2   | 0-0         | 0.00-0.00   | 0-1       | 0.00-33.33  |
|                        | Apr 19 to Apr 25, 2021 | 3   | 0-0         | 0.00-0.00   | 0-0       | 0.00-0.00   |
|                        | Apr 26 to May 2, 2021  | 2   | 0-0         | 0.00-0.00   | 0-1       | 0.00-33.33  |
|                        | May 3 to May 9, 2021   | 2   | 0-0         | 0.00-0.00   | 0-1       | 0.00-33.33  |
|                        | May 10 to May 16, 2021 | 4   | 0-2         | 0.00-100.00 | 0-0       | 0.00-0.00   |
|                        | May 17 to May 23, 2021 | 2   | 0-0         | 0.00-0.00   | 0-0       | 0.00-0.00   |
| Toyama                 | May 24 to May 30, 2021 | 2   | 0-0         | 0.00-0.00   | 0-0       | 0.00-0.00   |
|                        | Apr 5 to Apr 11, 2021  | 0   | 0-0         | 0.00-0.00   | 0-2       | 0.00-100.00 |
|                        | Apr 12 to Apr 18, 2021 | 2   | 0-0         | 0.00-0.00   | 0-0       | 0.00-0.00   |
|                        | Apr 19 to Apr 25, 2021 | 3   | 0-1         | 0.00-50.00  | 0-0       | 0.00-0.00   |
|                        | Apr 26 to May 2, 2021  | 1   | 0-0         | 0.00-0.00   | 0-1       | 0.00-50.00  |
|                        | May 3 to May 9, 2021   | 1   | 0-0         | 0.00-0.00   | 0-1       | 0.00-50.00  |
|                        | May 10 to May 16, 2021 | 1   | 0-0         | 0.00-0.00   | 0-1       | 0.00-50.00  |
|                        | May 17 to May 23, 2021 | 1   | NA          | NA          | NA        | NA          |
| Ishikawa               | May 24 to May 30, 2021 | 0   | NA          | NA          | NA        | NA          |
|                        | Apr 5 to Apr 11, 2021  | 3   | 0-1         | 0.00-50.00  | 0-0       | 0.00-0.00   |
|                        | Apr 12 to Apr 18, 2021 | 3   | 0-1         | 0.00-50.00  | 0-0       | 0.00-0.00   |
|                        | Apr 19 to Apr 25, 2021 | 2   | 0-0         | 0.00-0.00   | 0-0       | 0.00-0.00   |
|                        | Apr 26 to May 2, 2021  | 0   | 0-0         | 0.00-0.00   | 0-2       | 0.00-100.00 |
|                        | May 3 to May 9, 2021   | 1   | 0-0         | 0.00-0.00   | 0-1       | 0.00-50.00  |
|                        | May 10 to May 16, 2021 | 0   | NA          | NA          | NA        | NA          |
|                        | May 17 to May 23, 2021 | 0   | NA          | NA          | NA        | NA          |
| Fukui                  | May 24 to May 30, 2021 | 2   | NA          | NA          | NA        | NA          |
|                        | Apr 5 to Apr 11, 2021  | 1   | NA          | NA          | NA        | NA          |
|                        | Apr 12 to Apr 18, 2021 | 0   | NA          | NA          | NA        | NA          |
|                        | Apr 19 to Apr 25, 2021 | 1   | NA          | NA          | NA        | NA          |
|                        | Apr 26 to May 2, 2021  | 0   | NA          | NA          | NA        | NA          |
|                        | May 3 to May 9, 2021   | 3   | NA          | NA          | NA        | NA          |
|                        | May 10 to May 16, 2021 | 2   | 0-1         | 0.00-100.00 | 0-0       | 0.00-0.00   |
|                        | May 17 to May 23, 2021 | 4   | 0-3         | 0.00-300.00 | 0-0       | 0.00-0.00   |
| Yamanashi              | May 24 to May 30, 2021 | 2   | 0-1         | 0.00-100.00 | 0-0       | 0.00-0.00   |
|                        | Apr 5 to Apr 11, 2021  | 1   | 0-0         | 0.00-0.00   | 0-1       | 0.00-50.00  |
|                        | Apr 12 to Apr 18, 2021 | 1   | 0-0         | 0.00-0.00   | 0-2       | 0.00-66.67  |
|                        | Apr 19 to Apr 25, 2021 | 0   | 0-0         | 0.00-0.00   | 0-2       | 0.00-100.00 |
|                        | Apr 26 to May 2, 2021  | 0   | NA          | NA          | NA        | NA          |
|                        | May 3 to May 9, 2021   | 2   | NA          | NA          | NA        | NA          |
|                        | May 10 to May 16, 2021 | 2   | NA          | NA          | NA        | NA          |
|                        | May 17 to May 23, 2021 | 5   | 0-2         | 0.00-66.67  | 0-0       | 0.00-0.00   |
| May 24 to May 30, 2021 | 4                      | 0-2 | 0.00-100.00 | 0-0         | 0.00-0.00 |             |

Nagano

|                        |   |     |             |     |            |
|------------------------|---|-----|-------------|-----|------------|
| Apr 5 to Apr 11, 2021  | 3 | 0-0 | 0.00-0.00   | 0-0 | 0.00-0.00  |
| Apr 12 to Apr 18, 2021 | 5 | 0-2 | 0.00-66.67  | 0-0 | 0.00-0.00  |
| Apr 19 to Apr 25, 2021 | 4 | 0-1 | 0.00-33.33  | 0-0 | 0.00-0.00  |
| Apr 26 to May 2, 2021  | 2 | 0-0 | 0.00-0.00   | 0-2 | 0.00-50.00 |
| May 3 to May 9, 2021   | 7 | 0-4 | 0.00-133.33 | 0-0 | 0.00-0.00  |
| May 10 to May 16, 2021 | 5 | 0-2 | 0.00-66.67  | 0-0 | 0.00-0.00  |
| May 17 to May 23, 2021 | 3 | 0-0 | 0.00-0.00   | 0-0 | 0.00-0.00  |
| May 24 to May 30, 2021 | 6 | 0-3 | 0.00-100.00 | 0-0 | 0.00-0.00  |

Gifu

|                        |   |     |              |     |            |
|------------------------|---|-----|--------------|-----|------------|
| Apr 5 to Apr 11, 2021  | 4 | 0-0 | 0.00-0.00    | 0-0 | 0.00-0.00  |
| Apr 12 to Apr 18, 2021 | 7 | 0-3 | 0.00-75.00   | 0-0 | 0.00-0.00  |
| Apr 19 to Apr 25, 2021 | 4 | 0-0 | 0.00-0.00    | 0-0 | 0.00-0.00  |
| Apr 26 to May 2, 2021  | 1 | 0-0 | 0.00-0.00    | 0-3 | 0.00-75.00 |
| May 3 to May 9, 2021   | 8 | 1-5 | 33.33-166.67 | 0-0 | 0.00-0.00  |
| May 10 to May 16, 2021 | 5 | 0-2 | 0.00-66.67   | 0-0 | 0.00-0.00  |
| May 17 to May 23, 2021 | 7 | 0-4 | 0.00-133.33  | 0-0 | 0.00-0.00  |
| May 24 to May 30, 2021 | 4 | 0-1 | 0.00-33.33   | 0-0 | 0.00-0.00  |

Shizuoka

|                        |    |     |            |     |            |
|------------------------|----|-----|------------|-----|------------|
| Apr 5 to Apr 11, 2021  | 8  | 0-1 | 0.00-14.29 | 0-0 | 0.00-0.00  |
| Apr 12 to Apr 18, 2021 | 9  | 0-2 | 0.00-28.57 | 0-0 | 0.00-0.00  |
| Apr 19 to Apr 25, 2021 | 5  | 0-0 | 0.00-0.00  | 0-2 | 0.00-28.57 |
| Apr 26 to May 2, 2021  | 7  | 0-0 | 0.00-0.00  | 0-0 | 0.00-0.00  |
| May 3 to May 9, 2021   | 4  | 0-0 | 0.00-0.00  | 0-3 | 0.00-42.86 |
| May 10 to May 16, 2021 | 8  | 0-2 | 0.00-33.33 | 0-0 | 0.00-0.00  |
| May 17 to May 23, 2021 | 10 | 0-3 | 0.00-42.86 | 0-0 | 0.00-0.00  |
| May 24 to May 30, 2021 | 2  | 0-0 | 0.00-0.00  | 0-5 | 0.00-71.43 |

Aichi

|                        |    |     |              |     |            |
|------------------------|----|-----|--------------|-----|------------|
| Apr 5 to Apr 11, 2021  | 10 | 0-2 | 0.00-25.00   | 0-0 | 0.00-0.00  |
| Apr 12 to Apr 18, 2021 | 10 | 0-2 | 0.00-25.00   | 0-0 | 0.00-0.00  |
| Apr 19 to Apr 25, 2021 | 8  | 0-0 | 0.00-0.00    | 0-0 | 0.00-0.00  |
| Apr 26 to May 2, 2021  | 11 | 0-3 | 0.00-37.50   | 0-0 | 0.00-0.00  |
| May 3 to May 9, 2021   | 7  | 0-0 | 0.00-0.00    | 0-1 | 0.00-12.50 |
| May 10 to May 16, 2021 | 16 | 2-8 | 25.00-100.00 | 0-0 | 0.00-0.00  |
| May 17 to May 23, 2021 | 10 | 0-2 | 0.00-25.00   | 0-0 | 0.00-0.00  |
| May 24 to May 30, 2021 | 8  | 0-0 | 0.00-0.00    | 0-0 | 0.00-0.00  |

Mie

|                        |   |     |              |     |             |
|------------------------|---|-----|--------------|-----|-------------|
| Apr 5 to Apr 11, 2021  | 7 | 1-4 | 33.33-133.33 | 0-0 | 0.00-0.00   |
| Apr 12 to Apr 18, 2021 | 2 | 0-0 | 0.00-0.00    | 0-1 | 0.00-33.33  |
| Apr 19 to Apr 25, 2021 | 5 | 0-2 | 0.00-66.67   | 0-0 | 0.00-0.00   |
| Apr 26 to May 2, 2021  | 2 | 0-0 | 0.00-0.00    | 0-1 | 0.00-33.33  |
| May 3 to May 9, 2021   | 0 | 0-0 | 0.00-0.00    | 0-3 | 0.00-100.00 |
| May 10 to May 16, 2021 | 4 | 0-2 | 0.00-100.00  | 0-0 | 0.00-0.00   |
| May 17 to May 23, 2021 | 6 | 0-3 | 0.00-100.00  | 0-0 | 0.00-0.00   |
| May 24 to May 30, 2021 | 5 | 0-2 | 0.00-66.67   | 0-0 | 0.00-0.00   |

Shiga

|          |                        |    |      |              |     |             |
|----------|------------------------|----|------|--------------|-----|-------------|
|          | Apr 5 to Apr 11, 2021  | 0  | 0-0  | 0.00-0.00    | 0-3 | 0.00-100.00 |
|          | Apr 12 to Apr 18, 2021 | 1  | NA   | NA           | NA  | NA          |
|          | Apr 19 to Apr 25, 2021 | 2  | 0-0  | 0.00-0.00    | 0-0 | 0.00-0.00   |
|          | Apr 26 to May 2, 2021  | 2  | 0-0  | 0.00-0.00    | 0-0 | 0.00-0.00   |
|          | May 3 to May 9, 2021   | 2  | 0-0  | 0.00-0.00    | 0-0 | 0.00-0.00   |
|          | May 10 to May 16, 2021 | 2  | 0-0  | 0.00-0.00    | 0-0 | 0.00-0.00   |
|          | May 17 to May 23, 2021 | 0  | 0-0  | 0.00-0.00    | 0-2 | 0.00-100.00 |
|          | May 24 to May 30, 2021 | 3  | 0-1  | 0.00-50.00   | 0-0 | 0.00-0.00   |
| Kyoto    |                        |    |      |              |     |             |
|          | Apr 5 to Apr 11, 2021  | 5  | 0-1  | 0.00-25.00   | 0-0 | 0.00-0.00   |
|          | Apr 12 to Apr 18, 2021 | 3  | 0-0  | 0.00-0.00    | 0-0 | 0.00-0.00   |
|          | Apr 19 to Apr 25, 2021 | 8  | 1-5  | 33.33-166.67 | 0-0 | 0.00-0.00   |
|          | Apr 26 to May 2, 2021  | 4  | 0-1  | 0.00-33.33   | 0-0 | 0.00-0.00   |
|          | May 3 to May 9, 2021   | 6  | 0-3  | 0.00-100.00  | 0-0 | 0.00-0.00   |
|          | May 10 to May 16, 2021 | 5  | 0-2  | 0.00-66.67   | 0-0 | 0.00-0.00   |
|          | May 17 to May 23, 2021 | 3  | 0-0  | 0.00-0.00    | 0-0 | 0.00-0.00   |
|          | May 24 to May 30, 2021 | 4  | 0-1  | 0.00-33.33   | 0-0 | 0.00-0.00   |
| Osaka    |                        |    |      |              |     |             |
|          | Apr 5 to Apr 11, 2021  | 21 | 0-4  | 0.00-23.53   | 0-0 | 0.00-0.00   |
|          | Apr 12 to Apr 18, 2021 | 14 | 0-0  | 0.00-0.00    | 0-3 | 0.00-17.65  |
|          | Apr 19 to Apr 25, 2021 | 20 | 0-3  | 0.00-17.65   | 0-0 | 0.00-0.00   |
|          | Apr 26 to May 2, 2021  | 27 | 2-10 | 11.76-58.82  | 0-0 | 0.00-0.00   |
|          | May 3 to May 9, 2021   | 23 | 0-6  | 0.00-35.29   | 0-0 | 0.00-0.00   |
|          | May 10 to May 16, 2021 | 18 | 0-1  | 0.00-5.88    | 0-0 | 0.00-0.00   |
|          | May 17 to May 23, 2021 | 25 | 0-9  | 0.00-56.25   | 0-0 | 0.00-0.00   |
|          | May 24 to May 30, 2021 | 17 | 0-1  | 0.00-6.25    | 0-0 | 0.00-0.00   |
| Hyogo    |                        |    |      |              |     |             |
|          | Apr 5 to Apr 11, 2021  | 10 | 0-0  | 0.00-0.00    | 0-0 | 0.00-0.00   |
|          | Apr 12 to Apr 18, 2021 | 5  | 0-0  | 0.00-0.00    | 0-5 | 0.00-50.00  |
|          | Apr 19 to Apr 25, 2021 | 8  | 0-0  | 0.00-0.00    | 0-2 | 0.00-20.00  |
|          | Apr 26 to May 2, 2021  | 12 | 0-3  | 0.00-33.33   | 0-0 | 0.00-0.00   |
|          | May 3 to May 9, 2021   | 6  | 0-0  | 0.00-0.00    | 0-4 | 0.00-40.00  |
|          | May 10 to May 16, 2021 | 20 | 4-11 | 44.44-122.22 | 0-0 | 0.00-0.00   |
|          | May 17 to May 23, 2021 | 14 | 0-4  | 0.00-40.00   | 0-0 | 0.00-0.00   |
|          | May 24 to May 30, 2021 | 12 | 0-2  | 0.00-20.00   | 0-0 | 0.00-0.00   |
| Nara     |                        |    |      |              |     |             |
|          | Apr 5 to Apr 11, 2021  | 1  | NA   | NA           | NA  | NA          |
|          | Apr 12 to Apr 18, 2021 | 4  | 0-1  | 0.00-33.33   | 0-0 | 0.00-0.00   |
|          | Apr 19 to Apr 25, 2021 | 3  | 0-0  | 0.00-0.00    | 0-0 | 0.00-0.00   |
|          | Apr 26 to May 2, 2021  | 3  | 0-0  | 0.00-0.00    | 0-0 | 0.00-0.00   |
|          | May 3 to May 9, 2021   | 7  | 1-4  | 33.33-133.33 | 0-0 | 0.00-0.00   |
|          | May 10 to May 16, 2021 | 4  | 0-1  | 0.00-33.33   | 0-0 | 0.00-0.00   |
|          | May 17 to May 23, 2021 | 3  | 0-1  | 0.00-50.00   | 0-0 | 0.00-0.00   |
|          | May 24 to May 30, 2021 | 3  | 0-1  | 0.00-50.00   | 0-0 | 0.00-0.00   |
| Wakayama |                        |    |      |              |     |             |
|          | Apr 5 to Apr 11, 2021  | 3  | 0-0  | 0.00-0.00    | 0-0 | 0.00-0.00   |



|           |                        |   |     |             |     |             |
|-----------|------------------------|---|-----|-------------|-----|-------------|
|           | Apr 12 to Apr 18, 2021 | 4 | 0-1 | 0.00-33.33  | 0-0 | 0.00-0.00   |
|           | Apr 19 to Apr 25, 2021 | 3 | 0-0 | 0.00-0.00   | 0-0 | 0.00-0.00   |
|           | Apr 26 to May 2, 2021  | 1 | 0-0 | 0.00-0.00   | 0-1 | 0.00-50.00  |
|           | May 3 to May 9, 2021   | 1 | 0-0 | 0.00-0.00   | 0-1 | 0.00-50.00  |
|           | May 10 to May 16, 2021 | 0 | 0-0 | 0.00-0.00   | 0-2 | 0.00-100.00 |
|           | May 17 to May 23, 2021 | 2 | NA  | NA          | NA  | NA          |
|           | May 24 to May 30, 2021 | 3 | 0-1 | 0.00-50.00  | 0-0 | 0.00-0.00   |
| Tottori   |                        |   |     |             |     |             |
|           | Apr 5 to Apr 11, 2021  | 1 | 0-0 | 0.00-0.00   | 0-0 | 0.00-0.00   |
|           | Apr 12 to Apr 18, 2021 | 1 | NA  | NA          | NA  | NA          |
|           | Apr 19 to Apr 25, 2021 | 2 | NA  | NA          | NA  | NA          |
|           | Apr 26 to May 2, 2021  | 0 | NA  | NA          | NA  | NA          |
|           | May 3 to May 9, 2021   | 2 | 0-1 | 0.00-100.00 | 0-0 | 0.00-0.00   |
|           | May 10 to May 16, 2021 | 3 | 0-2 | 0.00-200.00 | 0-0 | 0.00-0.00   |
|           | May 17 to May 23, 2021 | 0 | 0-0 | 0.00-0.00   | 0-1 | 0.00-100.00 |
|           | May 24 to May 30, 2021 | 0 | 0-0 | 0.00-0.00   | 0-1 | 0.00-100.00 |
| Shimane   |                        |   |     |             |     |             |
|           | Apr 5 to Apr 11, 2021  | 4 | 0-3 | 0.00-300.00 | 0-0 | 0.00-0.00   |
|           | Apr 12 to Apr 18, 2021 | 4 | 0-3 | 0.00-300.00 | 0-0 | 0.00-0.00   |
|           | Apr 19 to Apr 25, 2021 | 1 | 0-0 | 0.00-0.00   | 0-0 | 0.00-0.00   |
|           | Apr 26 to May 2, 2021  | 3 | 0-2 | 0.00-200.00 | 0-0 | 0.00-0.00   |
|           | May 3 to May 9, 2021   | 3 | 0-2 | 0.00-200.00 | 0-0 | 0.00-0.00   |
|           | May 10 to May 16, 2021 | 2 | 0-1 | 0.00-100.00 | 0-0 | 0.00-0.00   |
|           | May 17 to May 23, 2021 | 0 | 0-0 | 0.00-0.00   | 0-1 | 0.00-100.00 |
|           | May 24 to May 30, 2021 | 0 | 0-0 | 0.00-0.00   | 0-2 | 0.00-100.00 |
| Okayama   |                        |   |     |             |     |             |
|           | Apr 5 to Apr 11, 2021  | 2 | 0-0 | 0.00-0.00   | 0-1 | 0.00-33.33  |
|           | Apr 12 to Apr 18, 2021 | 1 | 0-0 | 0.00-0.00   | 0-2 | 0.00-66.67  |
|           | Apr 19 to Apr 25, 2021 | 4 | 0-1 | 0.00-33.33  | 0-0 | 0.00-0.00   |
|           | Apr 26 to May 2, 2021  | 1 | 0-0 | 0.00-0.00   | 0-2 | 0.00-66.67  |
|           | May 3 to May 9, 2021   | 2 | 0-0 | 0.00-0.00   | 0-1 | 0.00-33.33  |
|           | May 10 to May 16, 2021 | 4 | 0-1 | 0.00-33.33  | 0-0 | 0.00-0.00   |
|           | May 17 to May 23, 2021 | 2 | 0-0 | 0.00-0.00   | 0-1 | 0.00-33.33  |
|           | May 24 to May 30, 2021 | 5 | 0-2 | 0.00-66.67  | 0-0 | 0.00-0.00   |
| Hiroshima |                        |   |     |             |     |             |
|           | Apr 5 to Apr 11, 2021  | 3 | 0-0 | 0.00-0.00   | 0-0 | 0.00-0.00   |
|           | Apr 12 to Apr 18, 2021 | 6 | 0-3 | 0.00-100.00 | 0-0 | 0.00-0.00   |
|           | Apr 19 to Apr 25, 2021 | 1 | 0-0 | 0.00-0.00   | 0-2 | 0.00-66.67  |
|           | Apr 26 to May 2, 2021  | 6 | 0-3 | 0.00-100.00 | 0-0 | 0.00-0.00   |
|           | May 3 to May 9, 2021   | 3 | 0-0 | 0.00-0.00   | 0-0 | 0.00-0.00   |
|           | May 10 to May 16, 2021 | 3 | 0-0 | 0.00-0.00   | 0-0 | 0.00-0.00   |
|           | May 17 to May 23, 2021 | 6 | 0-3 | 0.00-100.00 | 0-0 | 0.00-0.00   |
|           | May 24 to May 30, 2021 | 5 | 0-1 | 0.00-25.00  | 0-0 | 0.00-0.00   |
| Yamaguchi |                        |   |     |             |     |             |
|           | Apr 5 to Apr 11, 2021  | 1 | 0-0 | 0.00-0.00   | 0-0 | 0.00-0.00   |
|           | Apr 12 to Apr 18, 2021 | 1 | 0-0 | 0.00-0.00   | 0-0 | 0.00-0.00   |

|           |                        |   |     |               |     |             |
|-----------|------------------------|---|-----|---------------|-----|-------------|
|           | Apr 19 to Apr 25, 2021 | 4 | 0-3 | 0.00-300.00   | 0-0 | 0.00-0.00   |
|           | Apr 26 to May 2, 2021  | 2 | 0-1 | 0.00-100.00   | 0-0 | 0.00-0.00   |
|           | May 3 to May 9, 2021   | 4 | 0-3 | 0.00-300.00   | 0-0 | 0.00-0.00   |
|           | May 10 to May 16, 2021 | 3 | 0-1 | 0.00-50.00    | 0-0 | 0.00-0.00   |
|           | May 17 to May 23, 2021 | 6 | 1-4 | 50.00-200.00  | 0-0 | 0.00-0.00   |
|           | May 24 to May 30, 2021 | 0 | 0-0 | 0.00-0.00     | 0-2 | 0.00-100.00 |
| Tokushima |                        |   |     |               |     |             |
|           | Apr 5 to Apr 11, 2021  | 0 | NA  | NA            | NA  | NA          |
|           | Apr 12 to Apr 18, 2021 | 3 | 0-1 | 0.00-50.00    | 0-0 | 0.00-0.00   |
|           | Apr 19 to Apr 25, 2021 | 3 | 0-1 | 0.00-50.00    | 0-0 | 0.00-0.00   |
|           | Apr 26 to May 2, 2021  | 0 | 0-0 | 0.00-0.00     | 0-2 | 0.00-100.00 |
|           | May 3 to May 9, 2021   | 3 | 0-1 | 0.00-50.00    | 0-0 | 0.00-0.00   |
|           | May 10 to May 16, 2021 | 3 | 0-1 | 0.00-50.00    | 0-0 | 0.00-0.00   |
|           | May 17 to May 23, 2021 | 2 | 0-0 | 0.00-0.00     | 0-0 | 0.00-0.00   |
|           | May 24 to May 30, 2021 | 0 | 0-0 | 0.00-0.00     | 0-2 | 0.00-100.00 |
| Kagawa    |                        |   |     |               |     |             |
|           | Apr 5 to Apr 11, 2021  | 2 | 0-0 | 0.00-0.00     | 0-0 | 0.00-0.00   |
|           | Apr 12 to Apr 18, 2021 | 3 | 0-1 | 0.00-50.00    | 0-0 | 0.00-0.00   |
|           | Apr 19 to Apr 25, 2021 | 2 | 0-0 | 0.00-0.00     | 0-0 | 0.00-0.00   |
|           | Apr 26 to May 2, 2021  | 4 | 0-2 | 0.00-100.00   | 0-0 | 0.00-0.00   |
|           | May 3 to May 9, 2021   | 3 | 0-1 | 0.00-50.00    | 0-0 | 0.00-0.00   |
|           | May 10 to May 16, 2021 | 0 | 0-0 | 0.00-0.00     | 0-2 | 0.00-100.00 |
|           | May 17 to May 23, 2021 | 4 | 0-2 | 0.00-100.00   | 0-0 | 0.00-0.00   |
|           | May 24 to May 30, 2021 | 7 | 2-5 | 100.00-250.00 | 0-0 | 0.00-0.00   |
| Ehime     |                        |   |     |               |     |             |
|           | Apr 5 to Apr 11, 2021  | 1 | NA  | NA            | NA  | NA          |
|           | Apr 12 to Apr 18, 2021 | 6 | 0-3 | 0.00-100.00   | 0-0 | 0.00-0.00   |
|           | Apr 19 to Apr 25, 2021 | 6 | 0-3 | 0.00-100.00   | 0-0 | 0.00-0.00   |
|           | Apr 26 to May 2, 2021  | 3 | 0-0 | 0.00-0.00     | 0-0 | 0.00-0.00   |
|           | May 3 to May 9, 2021   | 3 | 0-0 | 0.00-0.00     | 0-0 | 0.00-0.00   |
|           | May 10 to May 16, 2021 | 4 | 0-1 | 0.00-33.33    | 0-0 | 0.00-0.00   |
|           | May 17 to May 23, 2021 | 4 | 0-1 | 0.00-33.33    | 0-0 | 0.00-0.00   |
|           | May 24 to May 30, 2021 | 3 | 0-1 | 0.00-50.00    | 0-0 | 0.00-0.00   |
| Kochi     |                        |   |     |               |     |             |
|           | Apr 5 to Apr 11, 2021  | 4 | 0-2 | 0.00-100.00   | 0-0 | 0.00-0.00   |
|           | Apr 12 to Apr 18, 2021 | 0 | 0-0 | 0.00-0.00     | 0-2 | 0.00-100.00 |
|           | Apr 19 to Apr 25, 2021 | 0 | 0-0 | 0.00-0.00     | 0-2 | 0.00-100.00 |
|           | Apr 26 to May 2, 2021  | 2 | 0-1 | 0.00-100.00   | 0-0 | 0.00-0.00   |
|           | May 3 to May 9, 2021   | 1 | NA  | NA            | NA  | NA          |
|           | May 10 to May 16, 2021 | 2 | 0-1 | 0.00-100.00   | 0-0 | 0.00-0.00   |
|           | May 17 to May 23, 2021 | 0 | 0-0 | 0.00-0.00     | 0-1 | 0.00-100.00 |
|           | May 24 to May 30, 2021 | 0 | NA  | NA            | NA  | NA          |
| Fukuoka   |                        |   |     |               |     |             |
|           | Apr 5 to Apr 11, 2021  | 6 | 0-1 | 0.00-20.00    | 0-0 | 0.00-0.00   |
|           | Apr 12 to Apr 18, 2021 | 7 | 0-2 | 0.00-40.00    | 0-0 | 0.00-0.00   |
|           | Apr 19 to Apr 25, 2021 | 4 | 0-0 | 0.00-0.00     | 0-1 | 0.00-20.00  |

|          |                        |    |     |              |     |             |
|----------|------------------------|----|-----|--------------|-----|-------------|
|          | Apr 26 to May 2, 2021  | 5  | 0-0 | 0.00-0.00    | 0-0 | 0.00-0.00   |
|          | May 3 to May 9, 2021   | 6  | 0-1 | 0.00-20.00   | 0-0 | 0.00-0.00   |
|          | May 10 to May 16, 2021 | 4  | 0-0 | 0.00-0.00    | 0-1 | 0.00-20.00  |
|          | May 17 to May 23, 2021 | 6  | 0-1 | 0.00-20.00   | 0-0 | 0.00-0.00   |
|          | May 24 to May 30, 2021 | 10 | 1-6 | 25.00-150.00 | 0-0 | 0.00-0.00   |
| Saga     |                        |    |     |              |     |             |
|          | Apr 5 to Apr 11, 2021  | 1  | 0-0 | 0.00-0.00    | 0-0 | 0.00-0.00   |
|          | Apr 12 to Apr 18, 2021 | 1  | 0-0 | 0.00-0.00    | 0-0 | 0.00-0.00   |
|          | Apr 19 to Apr 25, 2021 | 2  | 0-1 | 0.00-100.00  | 0-0 | 0.00-0.00   |
|          | Apr 26 to May 2, 2021  | 2  | 0-1 | 0.00-100.00  | 0-0 | 0.00-0.00   |
|          | May 3 to May 9, 2021   | 0  | 0-0 | 0.00-0.00    | 0-1 | 0.00-100.00 |
|          | May 10 to May 16, 2021 | 2  | 0-1 | 0.00-100.00  | 0-0 | 0.00-0.00   |
|          | May 17 to May 23, 2021 | 1  | 0-0 | 0.00-0.00    | 0-0 | 0.00-0.00   |
|          | May 24 to May 30, 2021 | 0  | NA  | NA           | NA  | NA          |
| Nagasaki |                        |    |     |              |     |             |
|          | Apr 5 to Apr 11, 2021  | 1  | 0-0 | 0.00-0.00    | 0-1 | 0.00-50.00  |
|          | Apr 12 to Apr 18, 2021 | 4  | 0-2 | 0.00-100.00  | 0-0 | 0.00-0.00   |
|          | Apr 19 to Apr 25, 2021 | 4  | 0-2 | 0.00-100.00  | 0-0 | 0.00-0.00   |
|          | Apr 26 to May 2, 2021  | 3  | 0-1 | 0.00-50.00   | 0-0 | 0.00-0.00   |
|          | May 3 to May 9, 2021   | 2  | 0-0 | 0.00-0.00    | 0-0 | 0.00-0.00   |
|          | May 10 to May 16, 2021 | 4  | 0-2 | 0.00-100.00  | 0-0 | 0.00-0.00   |
|          | May 17 to May 23, 2021 | 2  | 0-0 | 0.00-0.00    | 0-0 | 0.00-0.00   |
|          | May 24 to May 30, 2021 | 3  | 0-1 | 0.00-50.00   | 0-0 | 0.00-0.00   |
| Kumamoto |                        |    |     |              |     |             |
|          | Apr 5 to Apr 11, 2021  | 1  | 0-0 | 0.00-0.00    | 0-1 | 0.00-50.00  |
|          | Apr 12 to Apr 18, 2021 | 3  | 0-0 | 0.00-0.00    | 0-0 | 0.00-0.00   |
|          | Apr 19 to Apr 25, 2021 | 1  | 0-0 | 0.00-0.00    | 0-1 | 0.00-50.00  |
|          | Apr 26 to May 2, 2021  | 4  | 0-2 | 0.00-100.00  | 0-0 | 0.00-0.00   |
|          | May 3 to May 9, 2021   | 4  | 0-1 | 0.00-33.33   | 0-0 | 0.00-0.00   |
|          | May 10 to May 16, 2021 | 0  | 0-0 | 0.00-0.00    | 0-2 | 0.00-100.00 |
|          | May 17 to May 23, 2021 | 3  | 0-1 | 0.00-50.00   | 0-0 | 0.00-0.00   |
|          | May 24 to May 30, 2021 | 6  | 0-4 | 0.00-200.00  | 0-0 | 0.00-0.00   |
| Oita     |                        |    |     |              |     |             |
|          | Apr 5 to Apr 11, 2021  | 0  | NA  | NA           | NA  | NA          |
|          | Apr 12 to Apr 18, 2021 | 1  | NA  | NA           | NA  | NA          |
|          | Apr 19 to Apr 25, 2021 | 0  | NA  | NA           | NA  | NA          |
|          | Apr 26 to May 2, 2021  | 0  | NA  | NA           | NA  | NA          |
|          | May 3 to May 9, 2021   | 3  | NA  | NA           | NA  | NA          |
|          | May 10 to May 16, 2021 | 0  | NA  | NA           | NA  | NA          |
|          | May 17 to May 23, 2021 | 2  | 0-1 | 0.00-100.00  | 0-0 | 0.00-0.00   |
|          | May 24 to May 30, 2021 | 0  | 0-0 | 0.00-0.00    | 0-1 | 0.00-100.00 |
| Miyazaki |                        |    |     |              |     |             |
|          | Apr 5 to Apr 11, 2021  | 0  | NA  | NA           | NA  | NA          |
|          | Apr 12 to Apr 18, 2021 | 2  | NA  | NA           | NA  | NA          |
|          | Apr 19 to Apr 25, 2021 | 1  | 0-0 | 0.00-0.00    | 0-0 | 0.00-0.00   |
|          | Apr 26 to May 2, 2021  | 2  | 0-1 | 0.00-100.00  | 0-0 | 0.00-0.00   |

|           |                        |   |     |             |     |             |
|-----------|------------------------|---|-----|-------------|-----|-------------|
|           | May 3 to May 9, 2021   | 2 | 0-1 | 0.00-100.00 | 0-0 | 0.00-0.00   |
|           | May 10 to May 16, 2021 | 3 | 0-2 | 0.00-200.00 | 0-0 | 0.00-0.00   |
|           | May 17 to May 23, 2021 | 3 | 0-2 | 0.00-200.00 | 0-0 | 0.00-0.00   |
|           | May 24 to May 30, 2021 | 2 | 0-1 | 0.00-100.00 | 0-0 | 0.00-0.00   |
| Kagoshima |                        |   |     |             |     |             |
|           | Apr 5 to Apr 11, 2021  | 2 | 0-0 | 0.00-0.00   | 0-1 | 0.00-33.33  |
|           | Apr 12 to Apr 18, 2021 | 1 | 0-0 | 0.00-0.00   | 0-2 | 0.00-66.67  |
|           | Apr 19 to Apr 25, 2021 | 5 | 0-3 | 0.00-150.00 | 0-0 | 0.00-0.00   |
|           | Apr 26 to May 2, 2021  | 2 | 0-0 | 0.00-0.00   | 0-0 | 0.00-0.00   |
|           | May 3 to May 9, 2021   | 2 | 0-0 | 0.00-0.00   | 0-0 | 0.00-0.00   |
|           | May 10 to May 16, 2021 | 5 | 0-3 | 0.00-150.00 | 0-0 | 0.00-0.00   |
|           | May 17 to May 23, 2021 | 3 | 0-1 | 0.00-50.00  | 0-0 | 0.00-0.00   |
|           | May 24 to May 30, 2021 | 0 | 0-0 | 0.00-0.00   | 0-2 | 0.00-100.00 |
| Okinawa   |                        |   |     |             |     |             |
|           | Apr 5 to Apr 11, 2021  | 1 | 0-0 | 0.00-0.00   | 0-1 | 0.00-50.00  |
|           | Apr 12 to Apr 18, 2021 | 3 | 0-1 | 0.00-50.00  | 0-0 | 0.00-0.00   |
|           | Apr 19 to Apr 25, 2021 | 0 | NA  | NA          | NA  | NA          |
|           | Apr 26 to May 2, 2021  | 3 | 0-1 | 0.00-50.00  | 0-0 | 0.00-0.00   |
|           | May 3 to May 9, 2021   | 3 | 0-1 | 0.00-50.00  | 0-0 | 0.00-0.00   |
|           | May 10 to May 16, 2021 | 3 | 0-1 | 0.00-50.00  | 0-0 | 0.00-0.00   |
|           | May 17 to May 23, 2021 | 4 | 0-2 | 0.00-100.00 | 0-0 | 0.00-0.00   |
|           | May 24 to May 30, 2021 | 4 | 0-2 | 0.00-100.00 | 0-0 | 0.00-0.00   |

---

**Table A.9: Weekly number of observed and excess/exiguous deaths in Japan and 47 prefectures for circulatory disease-related deaths in all places from January 2020 through May 2021.**

| Prefecture | Week                   | Observed | Excess deaths | Percent excess | Exiguous deaths | Percent exiguous |
|------------|------------------------|----------|---------------|----------------|-----------------|------------------|
| Japan      |                        |          |               |                |                 |                  |
|            | Apr 5 to Apr 11, 2021  | 6986     | 0–271         | 0.00–4.04      | 0–0             | 0.00–0.00        |
|            | Apr 12 to Apr 18, 2021 | 7108     | 0–534         | 0.00–8.12      | 0–0             | 0.00–0.00        |
|            | Apr 19 to Apr 25, 2021 | 7062     | 27–638        | 0.42–9.93      | 0–0             | 0.00–0.00        |
|            | Apr 26 to May 2, 2021  | 7135     | 253–839       | 4.02–13.33     | 0–0             | 0.00–0.00        |
|            | May 3 to May 9, 2021   | 7042     | 308–886       | 5.00–14.39     | 0–0             | 0.00–0.00        |
|            | May 10 to May 16, 2021 | 6726     | 121–704       | 2.01–11.69     | 0–0             | 0.00–0.00        |
|            | May 17 to May 23, 2021 | 6356     | 0–499         | 0.00–8.52      | 0–0             | 0.00–0.00        |
|            | May 24 to May 30, 2021 | 6279     | 0–504         | 0.00–8.73      | 0–0             | 0.00–0.00        |
| Hokkaido   |                        |          |               |                |                 |                  |
|            | Apr 5 to Apr 11, 2021  | 320      | 0–0           | 0.00–0.00      | 0–0             | 0.00–0.00        |
|            | Apr 12 to Apr 18, 2021 | 301      | 0–0           | 0.00–0.00      | 0–14            | 0.00–4.44        |
|            | Apr 19 to Apr 25, 2021 | 350      | 0–36          | 0.00–11.46     | 0–0             | 0.00–0.00        |
|            | Apr 26 to May 2, 2021  | 328      | 0–20          | 0.00–6.49      | 0–0             | 0.00–0.00        |
|            | May 3 to May 9, 2021   | 357      | 12–55         | 3.97–18.21     | 0–0             | 0.00–0.00        |
|            | May 10 to May 16, 2021 | 345      | 3–45          | 1.00–15.00     | 0–0             | 0.00–0.00        |
|            | May 17 to May 23, 2021 | 352      | 9–52          | 3.00–17.33     | 0–0             | 0.00–0.00        |
|            | May 24 to May 30, 2021 | 323      | 0–30          | 0.00–10.24     | 0–0             | 0.00–0.00        |
| Aomori     |                        |          |               |                |                 |                  |
|            | Apr 5 to Apr 11, 2021  | 116      | 2–21          | 2.11–22.11     | 0–0             | 0.00–0.00        |
|            | Apr 12 to Apr 18, 2021 | 88       | 0–0           | 0.00–0.00      | 0–6             | 0.00–6.38        |
|            | Apr 19 to Apr 25, 2021 | 91       | 0–0           | 0.00–0.00      | 0–2             | 0.00–2.15        |
|            | Apr 26 to May 2, 2021  | 90       | 0–0           | 0.00–0.00      | 0–1             | 0.00–1.10        |
|            | May 3 to May 9, 2021   | 95       | 0–7           | 0.00–7.95      | 0–0             | 0.00–0.00        |
|            | May 10 to May 16, 2021 | 82       | 0–0           | 0.00–0.00      | 0–3             | 0.00–3.53        |
|            | May 17 to May 23, 2021 | 90       | 0–7           | 0.00–8.43      | 0–0             | 0.00–0.00        |
|            | May 24 to May 30, 2021 | 93       | 0–11          | 0.00–13.41     | 0–0             | 0.00–0.00        |
| Iwate      |                        |          |               |                |                 |                  |
|            | Apr 5 to Apr 11, 2021  | 96       | 0–0           | 0.00–0.00      | 0–4             | 0.00–4.00        |
|            | Apr 12 to Apr 18, 2021 | 92       | 0–0           | 0.00–0.00      | 0–5             | 0.00–5.15        |
|            | Apr 19 to Apr 25, 2021 | 89       | 0–0           | 0.00–0.00      | 0–7             | 0.00–7.29        |
|            | Apr 26 to May 2, 2021  | 118      | 4–25          | 4.30–26.88     | 0–0             | 0.00–0.00        |
|            | May 3 to May 9, 2021   | 116      | 6–27          | 6.74–30.34     | 0–0             | 0.00–0.00        |
|            | May 10 to May 16, 2021 | 90       | 0–4           | 0.00–4.65      | 0–0             | 0.00–0.00        |
|            | May 17 to May 23, 2021 | 104      | 0–18          | 0.00–20.93     | 0–0             | 0.00–0.00        |
|            | May 24 to May 30, 2021 | 98       | 0–13          | 0.00–15.29     | 0–0             | 0.00–0.00        |
| Miyagi     |                        |          |               |                |                 |                  |
|            | Apr 5 to Apr 11, 2021  | 158      | 0–24          | 0.00–17.91     | 0–0             | 0.00–0.00        |
|            | Apr 12 to Apr 18, 2021 | 127      | 0–0           | 0.00–0.00      | 0–5             | 0.00–3.79        |
|            | Apr 19 to Apr 25, 2021 | 132      | 0–4           | 0.00–3.13      | 0–0             | 0.00–0.00        |
|            | Apr 26 to May 2, 2021  | 157      | 7–32          | 5.60–25.60     | 0–0             | 0.00–0.00        |
|            | May 3 to May 9, 2021   | 129      | 0–6           | 0.00–4.88      | 0–0             | 0.00–0.00        |

|           |                        |     |       |             |      |            |
|-----------|------------------------|-----|-------|-------------|------|------------|
|           | May 10 to May 16, 2021 | 115 | 0-0   | 0.00-0.00   | 0-7  | 0.00-5.74  |
|           | May 17 to May 23, 2021 | 120 | 0-1   | 0.00-0.84   | 0-0  | 0.00-0.00  |
|           | May 24 to May 30, 2021 | 125 | 0-10  | 0.00-8.70   | 0-0  | 0.00-0.00  |
| Akita     |                        |     |       |             |      |            |
|           | Apr 5 to Apr 11, 2021  | 92  | 0-14  | 0.00-17.95  | 0-0  | 0.00-0.00  |
|           | Apr 12 to Apr 18, 2021 | 89  | 0-13  | 0.00-17.11  | 0-0  | 0.00-0.00  |
|           | Apr 19 to Apr 25, 2021 | 71  | 0-0   | 0.00-0.00   | 0-4  | 0.00-5.33  |
|           | Apr 26 to May 2, 2021  | 79  | 0-4   | 0.00-5.33   | 0-0  | 0.00-0.00  |
|           | May 3 to May 9, 2021   | 109 | 17-35 | 22.97-47.30 | 0-0  | 0.00-0.00  |
|           | May 10 to May 16, 2021 | 78  | 0-5   | 0.00-6.85   | 0-0  | 0.00-0.00  |
|           | May 17 to May 23, 2021 | 77  | 0-5   | 0.00-6.94   | 0-0  | 0.00-0.00  |
|           | May 24 to May 30, 2021 | 66  | 0-0   | 0.00-0.00   | 0-5  | 0.00-7.04  |
| Yamagata  |                        |     |       |             |      |            |
|           | Apr 5 to Apr 11, 2021  | 78  | 0-0   | 0.00-0.00   | 0-5  | 0.00-6.02  |
|           | Apr 12 to Apr 18, 2021 | 93  | 0-9   | 0.00-10.71  | 0-0  | 0.00-0.00  |
|           | Apr 19 to Apr 25, 2021 | 89  | 0-6   | 0.00-7.23   | 0-0  | 0.00-0.00  |
|           | Apr 26 to May 2, 2021  | 70  | 0-0   | 0.00-0.00   | 0-11 | 0.00-13.58 |
|           | May 3 to May 9, 2021   | 81  | 0-2   | 0.00-2.53   | 0-0  | 0.00-0.00  |
|           | May 10 to May 16, 2021 | 84  | 0-7   | 0.00-9.09   | 0-0  | 0.00-0.00  |
|           | May 17 to May 23, 2021 | 80  | 0-7   | 0.00-9.59   | 0-0  | 0.00-0.00  |
|           | May 24 to May 30, 2021 | 82  | 0-9   | 0.00-12.33  | 0-0  | 0.00-0.00  |
| Fukushima |                        |     |       |             |      |            |
|           | Apr 5 to Apr 11, 2021  | 132 | 0-5   | 0.00-3.94   | 0-0  | 0.00-0.00  |
|           | Apr 12 to Apr 18, 2021 | 137 | 0-11  | 0.00-8.73   | 0-0  | 0.00-0.00  |
|           | Apr 19 to Apr 25, 2021 | 143 | 0-19  | 0.00-15.32  | 0-0  | 0.00-0.00  |
|           | Apr 26 to May 2, 2021  | 134 | 0-12  | 0.00-9.84   | 0-0  | 0.00-0.00  |
|           | May 3 to May 9, 2021   | 141 | 0-22  | 0.00-18.49  | 0-0  | 0.00-0.00  |
|           | May 10 to May 16, 2021 | 126 | 0-8   | 0.00-6.78   | 0-0  | 0.00-0.00  |
|           | May 17 to May 23, 2021 | 136 | 0-20  | 0.00-17.24  | 0-0  | 0.00-0.00  |
|           | May 24 to May 30, 2021 | 118 | 0-5   | 0.00-4.42   | 0-0  | 0.00-0.00  |
| Ibaraki   |                        |     |       |             |      |            |
|           | Apr 5 to Apr 11, 2021  | 180 | 0-13  | 0.00-7.78   | 0-0  | 0.00-0.00  |
|           | Apr 12 to Apr 18, 2021 | 190 | 0-28  | 0.00-17.28  | 0-0  | 0.00-0.00  |
|           | Apr 19 to Apr 25, 2021 | 162 | 0-5   | 0.00-3.18   | 0-0  | 0.00-0.00  |
|           | Apr 26 to May 2, 2021  | 158 | 0-6   | 0.00-3.95   | 0-0  | 0.00-0.00  |
|           | May 3 to May 9, 2021   | 169 | 0-21  | 0.00-14.19  | 0-0  | 0.00-0.00  |
|           | May 10 to May 16, 2021 | 191 | 14-44 | 9.52-29.93  | 0-0  | 0.00-0.00  |
|           | May 17 to May 23, 2021 | 140 | 0-0   | 0.00-0.00   | 0-3  | 0.00-2.10  |
|           | May 24 to May 30, 2021 | 147 | 0-8   | 0.00-5.76   | 0-0  | 0.00-0.00  |
| Tochigi   |                        |     |       |             |      |            |
|           | Apr 5 to Apr 11, 2021  | 123 | 0-7   | 0.00-6.03   | 0-0  | 0.00-0.00  |
|           | Apr 12 to Apr 18, 2021 | 148 | 14-35 | 12.39-30.97 | 0-0  | 0.00-0.00  |
|           | Apr 19 to Apr 25, 2021 | 123 | 0-13  | 0.00-11.82  | 0-0  | 0.00-0.00  |
|           | Apr 26 to May 2, 2021  | 127 | 0-19  | 0.00-17.59  | 0-0  | 0.00-0.00  |
|           | May 3 to May 9, 2021   | 116 | 0-12  | 0.00-11.54  | 0-0  | 0.00-0.00  |
|           | May 10 to May 16, 2021 | 107 | 0-7   | 0.00-7.00   | 0-0  | 0.00-0.00  |

|          |                        |     |       |             |      |           |
|----------|------------------------|-----|-------|-------------|------|-----------|
|          | May 17 to May 23, 2021 | 136 | 18–38 | 18.37–38.78 | 0–0  | 0.00–0.00 |
|          | May 24 to May 30, 2021 | 100 | 0–4   | 0.00–4.17   | 0–0  | 0.00–0.00 |
| Gunma    |                        |     |       |             |      |           |
|          | Apr 5 to Apr 11, 2021  | 123 | 0–1   | 0.00–0.82   | 0–0  | 0.00–0.00 |
|          | Apr 12 to Apr 18, 2021 | 145 | 4–28  | 3.42–23.93  | 0–0  | 0.00–0.00 |
|          | Apr 19 to Apr 25, 2021 | 123 | 0–7   | 0.00–6.03   | 0–0  | 0.00–0.00 |
|          | Apr 26 to May 2, 2021  | 139 | 1–26  | 0.88–23.01  | 0–0  | 0.00–0.00 |
|          | May 3 to May 9, 2021   | 134 | 0–23  | 0.00–20.72  | 0–0  | 0.00–0.00 |
|          | May 10 to May 16, 2021 | 136 | 3–27  | 2.75–24.77  | 0–0  | 0.00–0.00 |
|          | May 17 to May 23, 2021 | 118 | 0–10  | 0.00–9.26   | 0–0  | 0.00–0.00 |
|          | May 24 to May 30, 2021 | 124 | 0–17  | 0.00–15.89  | 0–0  | 0.00–0.00 |
| Saitama  |                        |     |       |             |      |           |
|          | Apr 5 to Apr 11, 2021  | 327 | 0–0   | 0.00–0.00   | 0–7  | 0.00–2.10 |
|          | Apr 12 to Apr 18, 2021 | 348 | 0–21  | 0.00–6.42   | 0–0  | 0.00–0.00 |
|          | Apr 19 to Apr 25, 2021 | 362 | 0–44  | 0.00–13.84  | 0–0  | 0.00–0.00 |
|          | Apr 26 to May 2, 2021  | 391 | 32–78 | 10.22–24.92 | 0–0  | 0.00–0.00 |
|          | May 3 to May 9, 2021   | 382 | 33–77 | 10.82–25.25 | 0–0  | 0.00–0.00 |
|          | May 10 to May 16, 2021 | 330 | 0–30  | 0.00–10.00  | 0–0  | 0.00–0.00 |
|          | May 17 to May 23, 2021 | 303 | 0–11  | 0.00–3.77   | 0–0  | 0.00–0.00 |
|          | May 24 to May 30, 2021 | 310 | 0–23  | 0.00–8.01   | 0–0  | 0.00–0.00 |
| Chiba    |                        |     |       |             |      |           |
|          | Apr 5 to Apr 11, 2021  | 341 | 0–30  | 0.00–9.65   | 0–0  | 0.00–0.00 |
|          | Apr 12 to Apr 18, 2021 | 346 | 0–42  | 0.00–13.82  | 0–0  | 0.00–0.00 |
|          | Apr 19 to Apr 25, 2021 | 348 | 8–55  | 2.73–18.77  | 0–0  | 0.00–0.00 |
|          | Apr 26 to May 2, 2021  | 354 | 18–65 | 6.23–22.49  | 0–0  | 0.00–0.00 |
|          | May 3 to May 9, 2021   | 312 | 0–32  | 0.00–11.43  | 0–0  | 0.00–0.00 |
|          | May 10 to May 16, 2021 | 323 | 0–45  | 0.00–16.19  | 0–0  | 0.00–0.00 |
|          | May 17 to May 23, 2021 | 297 | 0–25  | 0.00–9.19   | 0–0  | 0.00–0.00 |
|          | May 24 to May 30, 2021 | 274 | 0–8   | 0.00–3.01   | 0–0  | 0.00–0.00 |
| Tokyo    |                        |     |       |             |      |           |
|          | Apr 5 to Apr 11, 2021  | 613 | 0–24  | 0.00–4.07   | 0–0  | 0.00–0.00 |
|          | Apr 12 to Apr 18, 2021 | 631 | 0–55  | 0.00–9.55   | 0–0  | 0.00–0.00 |
|          | Apr 19 to Apr 25, 2021 | 623 | 0–62  | 0.00–11.05  | 0–0  | 0.00–0.00 |
|          | Apr 26 to May 2, 2021  | 619 | 7–79  | 1.30–14.63  | 0–0  | 0.00–0.00 |
|          | May 3 to May 9, 2021   | 589 | 0–61  | 0.00–11.55  | 0–0  | 0.00–0.00 |
|          | May 10 to May 16, 2021 | 532 | 0–12  | 0.00–2.31   | 0–0  | 0.00–0.00 |
|          | May 17 to May 23, 2021 | 500 | 0–0   | 0.00–0.00   | 0–9  | 0.00–1.77 |
|          | May 24 to May 30, 2021 | 479 | 0–0   | 0.00–0.00   | 0–19 | 0.00–3.82 |
| Kanagawa |                        |     |       |             |      |           |
|          | Apr 5 to Apr 11, 2021  | 418 | 0–27  | 0.00–6.91   | 0–0  | 0.00–0.00 |
|          | Apr 12 to Apr 18, 2021 | 420 | 0–36  | 0.00–9.38   | 0–0  | 0.00–0.00 |
|          | Apr 19 to Apr 25, 2021 | 395 | 0–17  | 0.00–4.50   | 0–0  | 0.00–0.00 |
|          | Apr 26 to May 2, 2021  | 440 | 26–76 | 7.14–20.88  | 0–0  | 0.00–0.00 |
|          | May 3 to May 9, 2021   | 404 | 1–47  | 0.28–13.17  | 0–0  | 0.00–0.00 |
|          | May 10 to May 16, 2021 | 364 | 0–10  | 0.00–2.82   | 0–0  | 0.00–0.00 |
|          | May 17 to May 23, 2021 | 404 | 9–56  | 2.59–16.09  | 0–0  | 0.00–0.00 |

|                        |                        |     |           |             |           |            |
|------------------------|------------------------|-----|-----------|-------------|-----------|------------|
| Niigata                | May 24 to May 30, 2021 | 354 | 0-13      | 0.00-3.81   | 0-0       | 0.00-0.00  |
|                        | Apr 5 to Apr 11, 2021  | 154 | 0-4       | 0.00-2.67   | 0-0       | 0.00-0.00  |
|                        | Apr 12 to Apr 18, 2021 | 156 | 0-7       | 0.00-4.70   | 0-0       | 0.00-0.00  |
|                        | Apr 19 to Apr 25, 2021 | 151 | 0-4       | 0.00-2.72   | 0-0       | 0.00-0.00  |
|                        | Apr 26 to May 2, 2021  | 153 | 0-9       | 0.00-6.25   | 0-0       | 0.00-0.00  |
|                        | May 3 to May 9, 2021   | 142 | 0-1       | 0.00-0.71   | 0-0       | 0.00-0.00  |
|                        | May 10 to May 16, 2021 | 136 | 0-0       | 0.00-0.00   | 0-2       | 0.00-1.45  |
|                        | May 17 to May 23, 2021 | 133 | 0-0       | 0.00-0.00   | 0-2       | 0.00-1.48  |
| May 24 to May 30, 2021 | 127                    | 0-0 | 0.00-0.00 | 0-6         | 0.00-4.51 |            |
| Toyama                 | Apr 5 to Apr 11, 2021  | 84  | 8-24      | 13.33-40.00 | 0-0       | 0.00-0.00  |
|                        | Apr 12 to Apr 18, 2021 | 73  | 0-14      | 0.00-23.73  | 0-0       | 0.00-0.00  |
|                        | Apr 19 to Apr 25, 2021 | 56  | 0-0       | 0.00-0.00   | 0-1       | 0.00-1.75  |
|                        | Apr 26 to May 2, 2021  | 67  | 0-12      | 0.00-21.82  | 0-0       | 0.00-0.00  |
|                        | May 3 to May 9, 2021   | 70  | 0-16      | 0.00-29.63  | 0-0       | 0.00-0.00  |
|                        | May 10 to May 16, 2021 | 54  | 0-0       | 0.00-0.00   | 0-0       | 0.00-0.00  |
|                        | May 17 to May 23, 2021 | 50  | 0-0       | 0.00-0.00   | 0-3       | 0.00-5.66  |
|                        | May 24 to May 30, 2021 | 70  | 4-19      | 7.84-37.25  | 0-0       | 0.00-0.00  |
| Ishikawa               | Apr 5 to Apr 11, 2021  | 79  | 0-13      | 0.00-19.70  | 0-0       | 0.00-0.00  |
|                        | Apr 12 to Apr 18, 2021 | 78  | 0-13      | 0.00-20.00  | 0-0       | 0.00-0.00  |
|                        | Apr 19 to Apr 25, 2021 | 69  | 0-7       | 0.00-11.29  | 0-0       | 0.00-0.00  |
|                        | Apr 26 to May 2, 2021  | 80  | 5-21      | 8.47-35.59  | 0-0       | 0.00-0.00  |
|                        | May 3 to May 9, 2021   | 81  | 8-24      | 14.04-42.11 | 0-0       | 0.00-0.00  |
|                        | May 10 to May 16, 2021 | 75  | 2-18      | 3.51-31.58  | 0-0       | 0.00-0.00  |
|                        | May 17 to May 23, 2021 | 67  | 0-11      | 0.00-19.64  | 0-0       | 0.00-0.00  |
|                        | May 24 to May 30, 2021 | 75  | 3-20      | 5.45-36.36  | 0-0       | 0.00-0.00  |
| Fukui                  | Apr 5 to Apr 11, 2021  | 49  | 0-0       | 0.00-0.00   | 0-3       | 0.00-5.77  |
|                        | Apr 12 to Apr 18, 2021 | 52  | 0-2       | 0.00-4.00   | 0-0       | 0.00-0.00  |
|                        | Apr 19 to Apr 25, 2021 | 47  | 0-0       | 0.00-0.00   | 0-2       | 0.00-4.08  |
|                        | Apr 26 to May 2, 2021  | 66  | 3-19      | 6.38-40.43  | 0-0       | 0.00-0.00  |
|                        | May 3 to May 9, 2021   | 70  | 10-24     | 21.74-52.17 | 0-0       | 0.00-0.00  |
|                        | May 10 to May 16, 2021 | 52  | 0-7       | 0.00-15.56  | 0-0       | 0.00-0.00  |
|                        | May 17 to May 23, 2021 | 52  | 0-7       | 0.00-15.56  | 0-0       | 0.00-0.00  |
|                        | May 24 to May 30, 2021 | 53  | 0-9       | 0.00-20.45  | 0-0       | 0.00-0.00  |
| Yamanashi              | Apr 5 to Apr 11, 2021  | 42  | 0-0       | 0.00-0.00   | 0-8       | 0.00-16.00 |
|                        | Apr 12 to Apr 18, 2021 | 70  | 5-21      | 10.20-42.86 | 0-0       | 0.00-0.00  |
|                        | Apr 19 to Apr 25, 2021 | 50  | 0-3       | 0.00-6.38   | 0-0       | 0.00-0.00  |
|                        | Apr 26 to May 2, 2021  | 52  | 0-6       | 0.00-13.04  | 0-0       | 0.00-0.00  |
|                        | May 3 to May 9, 2021   | 50  | 0-6       | 0.00-13.64  | 0-0       | 0.00-0.00  |
|                        | May 10 to May 16, 2021 | 62  | 3-18      | 6.82-40.91  | 0-0       | 0.00-0.00  |
|                        | May 17 to May 23, 2021 | 45  | 0-1       | 0.00-2.27   | 0-0       | 0.00-0.00  |
|                        | May 24 to May 30, 2021 | 50  | 0-7       | 0.00-16.28  | 0-0       | 0.00-0.00  |



Nagano

|                        |     |      |           |      |            |
|------------------------|-----|------|-----------|------|------------|
| Apr 5 to Apr 11, 2021  | 133 | 0-0  | 0.00-0.00 | 0-2  | 0.00-1.48  |
| Apr 12 to Apr 18, 2021 | 126 | 0-0  | 0.00-0.00 | 0-9  | 0.00-6.67  |
| Apr 19 to Apr 25, 2021 | 136 | 0-2  | 0.00-1.49 | 0-0  | 0.00-0.00  |
| Apr 26 to May 2, 2021  | 128 | 0-0  | 0.00-0.00 | 0-3  | 0.00-2.29  |
| May 3 to May 9, 2021   | 130 | 0-1  | 0.00-0.78 | 0-0  | 0.00-0.00  |
| May 10 to May 16, 2021 | 139 | 0-12 | 0.00-9.45 | 0-0  | 0.00-0.00  |
| May 17 to May 23, 2021 | 113 | 0-0  | 0.00-0.00 | 0-12 | 0.00-9.60  |
| May 24 to May 30, 2021 | 106 | 0-0  | 0.00-0.00 | 0-13 | 0.00-10.92 |

Gifu

|                        |     |      |            |     |           |
|------------------------|-----|------|------------|-----|-----------|
| Apr 5 to Apr 11, 2021  | 112 | 0-3  | 0.00-2.75  | 0-0 | 0.00-0.00 |
| Apr 12 to Apr 18, 2021 | 113 | 0-6  | 0.00-5.61  | 0-0 | 0.00-0.00 |
| Apr 19 to Apr 25, 2021 | 130 | 4-26 | 3.85-25.00 | 0-0 | 0.00-0.00 |
| Apr 26 to May 2, 2021  | 104 | 0-4  | 0.00-4.00  | 0-0 | 0.00-0.00 |
| May 3 to May 9, 2021   | 98  | 0-4  | 0.00-4.26  | 0-0 | 0.00-0.00 |
| May 10 to May 16, 2021 | 108 | 0-14 | 0.00-14.89 | 0-0 | 0.00-0.00 |
| May 17 to May 23, 2021 | 109 | 0-18 | 0.00-19.78 | 0-0 | 0.00-0.00 |
| May 24 to May 30, 2021 | 107 | 0-17 | 0.00-18.89 | 0-0 | 0.00-0.00 |

Shizuoka

|                        |     |      |            |     |           |
|------------------------|-----|------|------------|-----|-----------|
| Apr 5 to Apr 11, 2021  | 230 | 0-22 | 0.00-10.58 | 0-0 | 0.00-0.00 |
| Apr 12 to Apr 18, 2021 | 230 | 0-26 | 0.00-12.75 | 0-0 | 0.00-0.00 |
| Apr 19 to Apr 25, 2021 | 219 | 0-20 | 0.00-10.05 | 0-0 | 0.00-0.00 |
| Apr 26 to May 2, 2021  | 217 | 0-23 | 0.00-11.86 | 0-0 | 0.00-0.00 |
| May 3 to May 9, 2021   | 198 | 0-9  | 0.00-4.76  | 0-0 | 0.00-0.00 |
| May 10 to May 16, 2021 | 206 | 0-20 | 0.00-10.75 | 0-0 | 0.00-0.00 |
| May 17 to May 23, 2021 | 190 | 0-10 | 0.00-5.56  | 0-0 | 0.00-0.00 |
| May 24 to May 30, 2021 | 182 | 0-5  | 0.00-2.82  | 0-0 | 0.00-0.00 |

Aichi

|                        |     |      |            |      |           |
|------------------------|-----|------|------------|------|-----------|
| Apr 5 to Apr 11, 2021  | 309 | 0-2  | 0.00-0.65  | 0-0  | 0.00-0.00 |
| Apr 12 to Apr 18, 2021 | 290 | 0-0  | 0.00-0.00  | 0-12 | 0.00-3.97 |
| Apr 19 to Apr 25, 2021 | 323 | 0-29 | 0.00-9.86  | 0-0  | 0.00-0.00 |
| Apr 26 to May 2, 2021  | 303 | 0-14 | 0.00-4.84  | 0-0  | 0.00-0.00 |
| May 3 to May 9, 2021   | 285 | 0-1  | 0.00-0.35  | 0-0  | 0.00-0.00 |
| May 10 to May 16, 2021 | 320 | 6-48 | 2.21-17.65 | 0-0  | 0.00-0.00 |
| May 17 to May 23, 2021 | 248 | 0-0  | 0.00-0.00  | 0-19 | 0.00-7.12 |
| May 24 to May 30, 2021 | 276 | 0-13 | 0.00-4.94  | 0-0  | 0.00-0.00 |

Mie

|                        |     |       |             |     |           |
|------------------------|-----|-------|-------------|-----|-----------|
| Apr 5 to Apr 11, 2021  | 106 | 0-0   | 0.00-0.00   | 0-0 | 0.00-0.00 |
| Apr 12 to Apr 18, 2021 | 110 | 0-8   | 0.00-7.84   | 0-0 | 0.00-0.00 |
| Apr 19 to Apr 25, 2021 | 95  | 0-0   | 0.00-0.00   | 0-4 | 0.00-4.04 |
| Apr 26 to May 2, 2021  | 128 | 11-34 | 11.70-36.17 | 0-0 | 0.00-0.00 |
| May 3 to May 9, 2021   | 84  | 0-0   | 0.00-0.00   | 0-7 | 0.00-7.69 |
| May 10 to May 16, 2021 | 94  | 0-5   | 0.00-5.62   | 0-0 | 0.00-0.00 |
| May 17 to May 23, 2021 | 99  | 0-12  | 0.00-13.79  | 0-0 | 0.00-0.00 |
| May 24 to May 30, 2021 | 79  | 0-0   | 0.00-0.00   | 0-7 | 0.00-8.14 |

Shiga

|          |                        |     |       |            |     |           |
|----------|------------------------|-----|-------|------------|-----|-----------|
|          | Apr 5 to Apr 11, 2021  | 68  | 0-3   | 0.00-4.62  | 0-0 | 0.00-0.00 |
|          | Apr 12 to Apr 18, 2021 | 81  | 0-16  | 0.00-24.62 | 0-0 | 0.00-0.00 |
|          | Apr 19 to Apr 25, 2021 | 59  | 0-0   | 0.00-0.00  | 0-3 | 0.00-4.84 |
|          | Apr 26 to May 2, 2021  | 62  | 0-1   | 0.00-1.64  | 0-0 | 0.00-0.00 |
|          | May 3 to May 9, 2021   | 72  | 0-14  | 0.00-24.14 | 0-0 | 0.00-0.00 |
|          | May 10 to May 16, 2021 | 58  | 0-2   | 0.00-3.57  | 0-0 | 0.00-0.00 |
|          | May 17 to May 23, 2021 | 65  | 0-11  | 0.00-20.37 | 0-0 | 0.00-0.00 |
|          | May 24 to May 30, 2021 | 66  | 0-15  | 0.00-29.41 | 0-0 | 0.00-0.00 |
| Kyoto    |                        |     |       |            |     |           |
|          | Apr 5 to Apr 11, 2021  | 158 | 0-21  | 0.00-15.33 | 0-0 | 0.00-0.00 |
|          | Apr 12 to Apr 18, 2021 | 146 | 0-12  | 0.00-8.96  | 0-0 | 0.00-0.00 |
|          | Apr 19 to Apr 25, 2021 | 154 | 0-22  | 0.00-16.67 | 0-0 | 0.00-0.00 |
|          | Apr 26 to May 2, 2021  | 159 | 4-31  | 3.13-24.22 | 0-0 | 0.00-0.00 |
|          | May 3 to May 9, 2021   | 147 | 0-21  | 0.00-16.67 | 0-0 | 0.00-0.00 |
|          | May 10 to May 16, 2021 | 147 | 2-27  | 1.67-22.50 | 0-0 | 0.00-0.00 |
|          | May 17 to May 23, 2021 | 146 | 3-28  | 2.54-23.73 | 0-0 | 0.00-0.00 |
|          | May 24 to May 30, 2021 | 133 | 0-17  | 0.00-14.66 | 0-0 | 0.00-0.00 |
| Osaka    |                        |     |       |            |     |           |
|          | Apr 5 to Apr 11, 2021  | 457 | 0-14  | 0.00-3.16  | 0-0 | 0.00-0.00 |
|          | Apr 12 to Apr 18, 2021 | 458 | 0-25  | 0.00-5.77  | 0-0 | 0.00-0.00 |
|          | Apr 19 to Apr 25, 2021 | 469 | 0-44  | 0.00-10.35 | 0-0 | 0.00-0.00 |
|          | Apr 26 to May 2, 2021  | 469 | 0-55  | 0.00-13.29 | 0-0 | 0.00-0.00 |
|          | May 3 to May 9, 2021   | 485 | 22-80 | 5.43-19.75 | 0-0 | 0.00-0.00 |
|          | May 10 to May 16, 2021 | 433 | 0-38  | 0.00-9.62  | 0-0 | 0.00-0.00 |
|          | May 17 to May 23, 2021 | 420 | 0-35  | 0.00-9.09  | 0-0 | 0.00-0.00 |
|          | May 24 to May 30, 2021 | 412 | 0-34  | 0.00-8.99  | 0-0 | 0.00-0.00 |
| Hyogo    |                        |     |       |            |     |           |
|          | Apr 5 to Apr 11, 2021  | 309 | 0-28  | 0.00-9.96  | 0-0 | 0.00-0.00 |
|          | Apr 12 to Apr 18, 2021 | 288 | 0-12  | 0.00-4.35  | 0-0 | 0.00-0.00 |
|          | Apr 19 to Apr 25, 2021 | 299 | 0-29  | 0.00-10.74 | 0-0 | 0.00-0.00 |
|          | Apr 26 to May 2, 2021  | 301 | 0-41  | 0.00-15.77 | 0-0 | 0.00-0.00 |
|          | May 3 to May 9, 2021   | 294 | 0-40  | 0.00-15.75 | 0-0 | 0.00-0.00 |
|          | May 10 to May 16, 2021 | 300 | 7-48  | 2.78-19.05 | 0-0 | 0.00-0.00 |
|          | May 17 to May 23, 2021 | 269 | 0-24  | 0.00-9.80  | 0-0 | 0.00-0.00 |
|          | May 24 to May 30, 2021 | 293 | 6-49  | 2.46-20.08 | 0-0 | 0.00-0.00 |
| Nara     |                        |     |       |            |     |           |
|          | Apr 5 to Apr 11, 2021  | 66  | 0-0   | 0.00-0.00  | 0-7 | 0.00-9.59 |
|          | Apr 12 to Apr 18, 2021 | 92  | 2-21  | 2.82-29.58 | 0-0 | 0.00-0.00 |
|          | Apr 19 to Apr 25, 2021 | 72  | 0-1   | 0.00-1.41  | 0-0 | 0.00-0.00 |
|          | Apr 26 to May 2, 2021  | 80  | 0-12  | 0.00-17.65 | 0-0 | 0.00-0.00 |
|          | May 3 to May 9, 2021   | 68  | 0-0   | 0.00-0.00  | 0-0 | 0.00-0.00 |
|          | May 10 to May 16, 2021 | 68  | 0-2   | 0.00-3.03  | 0-0 | 0.00-0.00 |
|          | May 17 to May 23, 2021 | 68  | 0-3   | 0.00-4.62  | 0-0 | 0.00-0.00 |
|          | May 24 to May 30, 2021 | 64  | 0-1   | 0.00-1.59  | 0-0 | 0.00-0.00 |
| Wakayama |                        |     |       |            |     |           |
|          | Apr 5 to Apr 11, 2021  | 67  | 0-5   | 0.00-8.06  | 0-0 | 0.00-0.00 |

|           |                        |     |      |             |      |            |
|-----------|------------------------|-----|------|-------------|------|------------|
|           | Apr 12 to Apr 18, 2021 | 48  | 0-0  | 0.00-0.00   | 0-13 | 0.00-21.31 |
|           | Apr 19 to Apr 25, 2021 | 63  | 0-4  | 0.00-6.78   | 0-0  | 0.00-0.00  |
|           | Apr 26 to May 2, 2021  | 62  | 0-6  | 0.00-10.71  | 0-0  | 0.00-0.00  |
|           | May 3 to May 9, 2021   | 65  | 0-11 | 0.00-20.37  | 0-0  | 0.00-0.00  |
|           | May 10 to May 16, 2021 | 68  | 1-16 | 1.92-30.77  | 0-0  | 0.00-0.00  |
|           | May 17 to May 23, 2021 | 50  | 0-0  | 0.00-0.00   | 0-0  | 0.00-0.00  |
|           | May 24 to May 30, 2021 | 49  | 0-0  | 0.00-0.00   | 0-0  | 0.00-0.00  |
| Tottori   |                        |     |      |             |      |            |
|           | Apr 5 to Apr 11, 2021  | 36  | 0-1  | 0.00-2.86   | 0-0  | 0.00-0.00  |
|           | Apr 12 to Apr 18, 2021 | 45  | 0-11 | 0.00-32.35  | 0-0  | 0.00-0.00  |
|           | Apr 19 to Apr 25, 2021 | 39  | 0-5  | 0.00-14.71  | 0-0  | 0.00-0.00  |
|           | Apr 26 to May 2, 2021  | 31  | 0-0  | 0.00-0.00   | 0-2  | 0.00-6.06  |
|           | May 3 to May 9, 2021   | 45  | 0-12 | 0.00-36.36  | 0-0  | 0.00-0.00  |
|           | May 10 to May 16, 2021 | 44  | 1-13 | 3.23-41.94  | 0-0  | 0.00-0.00  |
|           | May 17 to May 23, 2021 | 28  | 0-0  | 0.00-0.00   | 0-2  | 0.00-6.67  |
|           | May 24 to May 30, 2021 | 34  | 0-6  | 0.00-21.43  | 0-0  | 0.00-0.00  |
| Shimane   |                        |     |      |             |      |            |
|           | Apr 5 to Apr 11, 2021  | 37  | 0-0  | 0.00-0.00   | 0-11 | 0.00-22.92 |
|           | Apr 12 to Apr 18, 2021 | 56  | 0-8  | 0.00-16.67  | 0-0  | 0.00-0.00  |
|           | Apr 19 to Apr 25, 2021 | 38  | 0-0  | 0.00-0.00   | 0-10 | 0.00-20.83 |
|           | Apr 26 to May 2, 2021  | 46  | 0-0  | 0.00-0.00   | 0-1  | 0.00-2.13  |
|           | May 3 to May 9, 2021   | 51  | 0-6  | 0.00-13.33  | 0-0  | 0.00-0.00  |
|           | May 10 to May 16, 2021 | 49  | 0-7  | 0.00-16.67  | 0-0  | 0.00-0.00  |
|           | May 17 to May 23, 2021 | 58  | 4-18 | 10.00-45.00 | 0-0  | 0.00-0.00  |
|           | May 24 to May 30, 2021 | 36  | 0-0  | 0.00-0.00   | 0-3  | 0.00-7.69  |
| Okayama   |                        |     |      |             |      |            |
|           | Apr 5 to Apr 11, 2021  | 104 | 0-0  | 0.00-0.00   | 0-1  | 0.00-0.95  |
|           | Apr 12 to Apr 18, 2021 | 91  | 0-0  | 0.00-0.00   | 0-11 | 0.00-10.78 |
|           | Apr 19 to Apr 25, 2021 | 112 | 0-13 | 0.00-13.13  | 0-0  | 0.00-0.00  |
|           | Apr 26 to May 2, 2021  | 112 | 0-14 | 0.00-14.29  | 0-0  | 0.00-0.00  |
|           | May 3 to May 9, 2021   | 104 | 0-7  | 0.00-7.22   | 0-0  | 0.00-0.00  |
|           | May 10 to May 16, 2021 | 101 | 0-5  | 0.00-5.21   | 0-0  | 0.00-0.00  |
|           | May 17 to May 23, 2021 | 110 | 0-17 | 0.00-18.28  | 0-0  | 0.00-0.00  |
|           | May 24 to May 30, 2021 | 107 | 0-18 | 0.00-20.22  | 0-0  | 0.00-0.00  |
| Hiroshima |                        |     |      |             |      |            |
|           | Apr 5 to Apr 11, 2021  | 181 | 7-32 | 4.70-21.48  | 0-0  | 0.00-0.00  |
|           | Apr 12 to Apr 18, 2021 | 181 | 8-33 | 5.41-22.30  | 0-0  | 0.00-0.00  |
|           | Apr 19 to Apr 25, 2021 | 163 | 0-19 | 0.00-13.19  | 0-0  | 0.00-0.00  |
|           | Apr 26 to May 2, 2021  | 156 | 0-13 | 0.00-9.09   | 0-0  | 0.00-0.00  |
|           | May 3 to May 9, 2021   | 166 | 0-25 | 0.00-17.73  | 0-0  | 0.00-0.00  |
|           | May 10 to May 16, 2021 | 163 | 0-24 | 0.00-17.27  | 0-0  | 0.00-0.00  |
|           | May 17 to May 23, 2021 | 147 | 0-14 | 0.00-10.53  | 0-0  | 0.00-0.00  |
|           | May 24 to May 30, 2021 | 142 | 0-11 | 0.00-8.40   | 0-0  | 0.00-0.00  |
| Yamaguchi |                        |     |      |             |      |            |
|           | Apr 5 to Apr 11, 2021  | 88  | 0-0  | 0.00-0.00   | 0-12 | 0.00-12.00 |
|           | Apr 12 to Apr 18, 2021 | 119 | 0-20 | 0.00-20.20  | 0-0  | 0.00-0.00  |

|           |                        |     |       |             |      |            |
|-----------|------------------------|-----|-------|-------------|------|------------|
|           | Apr 19 to Apr 25, 2021 | 106 | 0-10  | 0.00-10.42  | 0-0  | 0.00-0.00  |
|           | Apr 26 to May 2, 2021  | 92  | 0-0   | 0.00-0.00   | 0-2  | 0.00-2.13  |
|           | May 3 to May 9, 2021   | 102 | 0-10  | 0.00-10.87  | 0-0  | 0.00-0.00  |
|           | May 10 to May 16, 2021 | 76  | 0-0   | 0.00-0.00   | 0-13 | 0.00-14.61 |
|           | May 17 to May 23, 2021 | 94  | 0-7   | 0.00-8.05   | 0-0  | 0.00-0.00  |
|           | May 24 to May 30, 2021 | 93  | 0-10  | 0.00-12.05  | 0-0  | 0.00-0.00  |
| Tokushima |                        |     |       |             |      |            |
|           | Apr 5 to Apr 11, 2021  | 52  | 0-5   | 0.00-10.64  | 0-0  | 0.00-0.00  |
|           | Apr 12 to Apr 18, 2021 | 47  | 0-1   | 0.00-2.17   | 0-0  | 0.00-0.00  |
|           | Apr 19 to Apr 25, 2021 | 60  | 1-15  | 2.22-33.33  | 0-0  | 0.00-0.00  |
|           | Apr 26 to May 2, 2021  | 56  | 0-12  | 0.00-27.27  | 0-0  | 0.00-0.00  |
|           | May 3 to May 9, 2021   | 77  | 21-34 | 48.84-79.07 | 0-0  | 0.00-0.00  |
|           | May 10 to May 16, 2021 | 63  | 8-21  | 19.05-50.00 | 0-0  | 0.00-0.00  |
|           | May 17 to May 23, 2021 | 43  | 0-3   | 0.00-7.50   | 0-0  | 0.00-0.00  |
|           | May 24 to May 30, 2021 | 56  | 4-17  | 10.26-43.59 | 0-0  | 0.00-0.00  |
| Kagawa    |                        |     |       |             |      |            |
|           | Apr 5 to Apr 11, 2021  | 66  | 0-2   | 0.00-3.13   | 0-0  | 0.00-0.00  |
|           | Apr 12 to Apr 18, 2021 | 71  | 0-8   | 0.00-12.70  | 0-0  | 0.00-0.00  |
|           | Apr 19 to Apr 25, 2021 | 63  | 0-3   | 0.00-5.00   | 0-0  | 0.00-0.00  |
|           | Apr 26 to May 2, 2021  | 74  | 0-16  | 0.00-27.59  | 0-0  | 0.00-0.00  |
|           | May 3 to May 9, 2021   | 58  | 0-2   | 0.00-3.57   | 0-0  | 0.00-0.00  |
|           | May 10 to May 16, 2021 | 62  | 0-7   | 0.00-12.73  | 0-0  | 0.00-0.00  |
|           | May 17 to May 23, 2021 | 40  | 0-0   | 0.00-0.00   | 0-13 | 0.00-24.53 |
|           | May 24 to May 30, 2021 | 55  | 0-3   | 0.00-5.77   | 0-0  | 0.00-0.00  |
| Ehime     |                        |     |       |             |      |            |
|           | Apr 5 to Apr 11, 2021  | 90  | 0-0   | 0.00-0.00   | 0-7  | 0.00-7.22  |
|           | Apr 12 to Apr 18, 2021 | 115 | 2-21  | 2.13-22.34  | 0-0  | 0.00-0.00  |
|           | Apr 19 to Apr 25, 2021 | 101 | 0-10  | 0.00-10.99  | 0-0  | 0.00-0.00  |
|           | Apr 26 to May 2, 2021  | 111 | 3-23  | 3.41-26.14  | 0-0  | 0.00-0.00  |
|           | May 3 to May 9, 2021   | 112 | 8-26  | 9.30-30.23  | 0-0  | 0.00-0.00  |
|           | May 10 to May 16, 2021 | 117 | 15-33 | 17.86-39.29 | 0-0  | 0.00-0.00  |
|           | May 17 to May 23, 2021 | 93  | 0-11  | 0.00-13.41  | 0-0  | 0.00-0.00  |
|           | May 24 to May 30, 2021 | 100 | 1-19  | 1.23-23.46  | 0-0  | 0.00-0.00  |
| Kochi     |                        |     |       |             |      |            |
|           | Apr 5 to Apr 11, 2021  | 50  | 0-1   | 0.00-2.04   | 0-0  | 0.00-0.00  |
|           | Apr 12 to Apr 18, 2021 | 52  | 0-2   | 0.00-4.00   | 0-0  | 0.00-0.00  |
|           | Apr 19 to Apr 25, 2021 | 53  | 0-5   | 0.00-10.42  | 0-0  | 0.00-0.00  |
|           | Apr 26 to May 2, 2021  | 55  | 0-8   | 0.00-17.02  | 0-0  | 0.00-0.00  |
|           | May 3 to May 9, 2021   | 53  | 0-6   | 0.00-12.77  | 0-0  | 0.00-0.00  |
|           | May 10 to May 16, 2021 | 51  | 0-5   | 0.00-10.87  | 0-0  | 0.00-0.00  |
|           | May 17 to May 23, 2021 | 44  | 0-0   | 0.00-0.00   | 0-1  | 0.00-2.22  |
|           | May 24 to May 30, 2021 | 56  | 0-12  | 0.00-27.27  | 0-0  | 0.00-0.00  |
| Fukuoka   |                        |     |       |             |      |            |
|           | Apr 5 to Apr 11, 2021  | 209 | 0-0   | 0.00-0.00   | 0-24 | 0.00-10.30 |
|           | Apr 12 to Apr 18, 2021 | 221 | 0-0   | 0.00-0.00   | 0-9  | 0.00-3.91  |
|           | Apr 19 to Apr 25, 2021 | 242 | 0-15  | 0.00-6.61   | 0-0  | 0.00-0.00  |

|          |                        |     |       |             |      |            |
|----------|------------------------|-----|-------|-------------|------|------------|
|          | Apr 26 to May 2, 2021  | 249 | 0-25  | 0.00-11.16  | 0-0  | 0.00-0.00  |
|          | May 3 to May 9, 2021   | 243 | 0-25  | 0.00-11.47  | 0-0  | 0.00-0.00  |
|          | May 10 to May 16, 2021 | 228 | 0-14  | 0.00-6.54   | 0-0  | 0.00-0.00  |
|          | May 17 to May 23, 2021 | 203 | 0-0   | 0.00-0.00   | 0-7  | 0.00-3.33  |
|          | May 24 to May 30, 2021 | 218 | 0-11  | 0.00-5.31   | 0-0  | 0.00-0.00  |
| Saga     |                        |     |       |             |      |            |
|          | Apr 5 to Apr 11, 2021  | 47  | 0-2   | 0.00-4.44   | 0-0  | 0.00-0.00  |
|          | Apr 12 to Apr 18, 2021 | 42  | 0-0   | 0.00-0.00   | 0-2  | 0.00-4.55  |
|          | Apr 19 to Apr 25, 2021 | 48  | 0-4   | 0.00-9.09   | 0-0  | 0.00-0.00  |
|          | Apr 26 to May 2, 2021  | 31  | 0-0   | 0.00-0.00   | 0-12 | 0.00-27.91 |
|          | May 3 to May 9, 2021   | 45  | 0-3   | 0.00-7.14   | 0-0  | 0.00-0.00  |
|          | May 10 to May 16, 2021 | 31  | 0-0   | 0.00-0.00   | 0-10 | 0.00-24.39 |
|          | May 17 to May 23, 2021 | 39  | 0-0   | 0.00-0.00   | 0-2  | 0.00-4.88  |
|          | May 24 to May 30, 2021 | 46  | 0-5   | 0.00-12.20  | 0-0  | 0.00-0.00  |
| Nagasaki |                        |     |       |             |      |            |
|          | Apr 5 to Apr 11, 2021  | 84  | 0-0   | 0.00-0.00   | 0-0  | 0.00-0.00  |
|          | Apr 12 to Apr 18, 2021 | 76  | 0-0   | 0.00-0.00   | 0-9  | 0.00-10.59 |
|          | Apr 19 to Apr 25, 2021 | 89  | 0-5   | 0.00-5.95   | 0-0  | 0.00-0.00  |
|          | Apr 26 to May 2, 2021  | 88  | 0-7   | 0.00-8.64   | 0-0  | 0.00-0.00  |
|          | May 3 to May 9, 2021   | 96  | 0-18  | 0.00-23.08  | 0-0  | 0.00-0.00  |
|          | May 10 to May 16, 2021 | 92  | 0-15  | 0.00-19.48  | 0-0  | 0.00-0.00  |
|          | May 17 to May 23, 2021 | 78  | 0-2   | 0.00-2.63   | 0-0  | 0.00-0.00  |
|          | May 24 to May 30, 2021 | 90  | 0-16  | 0.00-21.62  | 0-0  | 0.00-0.00  |
| Kumamoto |                        |     |       |             |      |            |
|          | Apr 5 to Apr 11, 2021  | 97  | 0-0   | 0.00-0.00   | 0-3  | 0.00-3.00  |
|          | Apr 12 to Apr 18, 2021 | 104 | 0-7   | 0.00-7.22   | 0-0  | 0.00-0.00  |
|          | Apr 19 to Apr 25, 2021 | 102 | 0-6   | 0.00-6.25   | 0-0  | 0.00-0.00  |
|          | Apr 26 to May 2, 2021  | 111 | 0-16  | 0.00-16.84  | 0-0  | 0.00-0.00  |
|          | May 3 to May 9, 2021   | 106 | 0-14  | 0.00-15.22  | 0-0  | 0.00-0.00  |
|          | May 10 to May 16, 2021 | 102 | 0-15  | 0.00-17.24  | 0-0  | 0.00-0.00  |
|          | May 17 to May 23, 2021 | 98  | 0-13  | 0.00-15.29  | 0-0  | 0.00-0.00  |
|          | May 24 to May 30, 2021 | 110 | 8-26  | 9.52-30.95  | 0-0  | 0.00-0.00  |
| Oita     |                        |     |       |             |      |            |
|          | Apr 5 to Apr 11, 2021  | 71  | 0-0   | 0.00-0.00   | 0-1  | 0.00-1.39  |
|          | Apr 12 to Apr 18, 2021 | 73  | 0-3   | 0.00-4.29   | 0-0  | 0.00-0.00  |
|          | Apr 19 to Apr 25, 2021 | 100 | 13-30 | 18.57-42.86 | 0-0  | 0.00-0.00  |
|          | Apr 26 to May 2, 2021  | 64  | 0-0   | 0.00-0.00   | 0-4  | 0.00-5.88  |
|          | May 3 to May 9, 2021   | 75  | 0-8   | 0.00-11.94  | 0-0  | 0.00-0.00  |
|          | May 10 to May 16, 2021 | 86  | 4-20  | 6.06-30.30  | 0-0  | 0.00-0.00  |
|          | May 17 to May 23, 2021 | 74  | 0-10  | 0.00-15.63  | 0-0  | 0.00-0.00  |
|          | May 24 to May 30, 2021 | 65  | 0-3   | 0.00-4.84   | 0-0  | 0.00-0.00  |
| Miyazaki |                        |     |       |             |      |            |
|          | Apr 5 to Apr 11, 2021  | 56  | 0-0   | 0.00-0.00   | 0-14 | 0.00-20.00 |
|          | Apr 12 to Apr 18, 2021 | 79  | 0-9   | 0.00-12.86  | 0-0  | 0.00-0.00  |
|          | Apr 19 to Apr 25, 2021 | 72  | 0-4   | 0.00-5.88   | 0-0  | 0.00-0.00  |
|          | Apr 26 to May 2, 2021  | 63  | 0-0   | 0.00-0.00   | 0-5  | 0.00-7.35  |

|           |                        |     |      |            |     |           |
|-----------|------------------------|-----|------|------------|-----|-----------|
|           | May 3 to May 9, 2021   | 77  | 0-9  | 0.00-13.24 | 0-0 | 0.00-0.00 |
|           | May 10 to May 16, 2021 | 76  | 0-10 | 0.00-15.15 | 0-0 | 0.00-0.00 |
|           | May 17 to May 23, 2021 | 79  | 0-14 | 0.00-21.54 | 0-0 | 0.00-0.00 |
|           | May 24 to May 30, 2021 | 66  | 0-2  | 0.00-3.13  | 0-0 | 0.00-0.00 |
| Kagoshima |                        |     |      |            |     |           |
|           | Apr 5 to Apr 11, 2021  | 115 | 0-10 | 0.00-9.52  | 0-0 | 0.00-0.00 |
|           | Apr 12 to Apr 18, 2021 | 102 | 0-0  | 0.00-0.00  | 0-1 | 0.00-0.97 |
|           | Apr 19 to Apr 25, 2021 | 119 | 0-19 | 0.00-19.00 | 0-0 | 0.00-0.00 |
|           | Apr 26 to May 2, 2021  | 106 | 0-8  | 0.00-8.16  | 0-0 | 0.00-0.00 |
|           | May 3 to May 9, 2021   | 103 | 0-7  | 0.00-7.29  | 0-0 | 0.00-0.00 |
|           | May 10 to May 16, 2021 | 100 | 0-6  | 0.00-6.38  | 0-0 | 0.00-0.00 |
|           | May 17 to May 23, 2021 | 92  | 0-0  | 0.00-0.00  | 0-1 | 0.00-1.08 |
|           | May 24 to May 30, 2021 | 108 | 0-17 | 0.00-18.68 | 0-0 | 0.00-0.00 |
| Okinawa   |                        |     |      |            |     |           |
|           | Apr 5 to Apr 11, 2021  | 63  | 0-3  | 0.00-5.00  | 0-0 | 0.00-0.00 |
|           | Apr 12 to Apr 18, 2021 | 68  | 0-8  | 0.00-13.33 | 0-0 | 0.00-0.00 |
|           | Apr 19 to Apr 25, 2021 | 62  | 0-3  | 0.00-5.08  | 0-0 | 0.00-0.00 |
|           | Apr 26 to May 2, 2021  | 55  | 0-0  | 0.00-0.00  | 0-4 | 0.00-6.78 |
|           | May 3 to May 9, 2021   | 56  | 0-0  | 0.00-0.00  | 0-4 | 0.00-6.67 |
|           | May 10 to May 16, 2021 | 62  | 0-3  | 0.00-5.08  | 0-0 | 0.00-0.00 |
|           | May 17 to May 23, 2021 | 55  | 0-0  | 0.00-0.00  | 0-4 | 0.00-6.78 |
|           | May 24 to May 30, 2021 | 62  | 0-4  | 0.00-6.90  | 0-0 | 0.00-0.00 |

---

**Table A.10: Weekly number of observed and excess/exiguous deaths in Japan and 47 prefectures for circulatory disease-related deaths in hospitals and clinics from January 2020 through May 2021.**

| Prefecture | Week                   | Observed | Excess deaths | Percent excess | Exiguous deaths | Percent exiguous |
|------------|------------------------|----------|---------------|----------------|-----------------|------------------|
| Japan      |                        |          |               |                |                 |                  |
|            | Apr 5 to Apr 11, 2021  | 4799     | 0–176         | 0.00–3.81      | 0–0             | 0.00–0.00        |
|            | Apr 12 to Apr 18, 2021 | 4818     | 0–295         | 0.00–6.52      | 0–0             | 0.00–0.00        |
|            | Apr 19 to Apr 25, 2021 | 4903     | 99–456        | 2.23–10.25     | 0–0             | 0.00–0.00        |
|            | Apr 26 to May 2, 2021  | 4770     | 46–406        | 1.05–9.30      | 0–0             | 0.00–0.00        |
|            | May 3 to May 9, 2021   | 4736     | 99–454        | 2.31–10.60     | 0–0             | 0.00–0.00        |
|            | May 10 to May 16, 2021 | 4497     | 0–308         | 0.00–7.35      | 0–0             | 0.00–0.00        |
|            | May 17 to May 23, 2021 | 4290     | 0–213         | 0.00–5.22      | 0–0             | 0.00–0.00        |
|            | May 24 to May 30, 2021 | 4311     | 0–308         | 0.00–7.69      | 0–0             | 0.00–0.00        |
| Hokkaido   |                        |          |               |                |                 |                  |
|            | Apr 5 to Apr 11, 2021  | 252      | 0–0           | 0.00–0.00      | 0–0             | 0.00–0.00        |
|            | Apr 12 to Apr 18, 2021 | 230      | 0–0           | 0.00–0.00      | 0–17            | 0.00–6.88        |
|            | Apr 19 to Apr 25, 2021 | 289      | 10–43         | 4.07–17.48     | 0–0             | 0.00–0.00        |
|            | Apr 26 to May 2, 2021  | 257      | 0–17          | 0.00–7.08      | 0–0             | 0.00–0.00        |
|            | May 3 to May 9, 2021   | 270      | 0–34          | 0.00–14.41     | 0–0             | 0.00–0.00        |
|            | May 10 to May 16, 2021 | 267      | 0–32          | 0.00–13.62     | 0–0             | 0.00–0.00        |
|            | May 17 to May 23, 2021 | 268      | 1–35          | 0.43–15.02     | 0–0             | 0.00–0.00        |
|            | May 24 to May 30, 2021 | 254      | 0–26          | 0.00–11.40     | 0–0             | 0.00–0.00        |
| Aomori     |                        |          |               |                |                 |                  |
|            | Apr 5 to Apr 11, 2021  | 79       | 0–10          | 0.00–14.49     | 0–0             | 0.00–0.00        |
|            | Apr 12 to Apr 18, 2021 | 52       | 0–0           | 0.00–0.00      | 1–17            | 1.45–24.64       |
|            | Apr 19 to Apr 25, 2021 | 65       | 0–0           | 0.00–0.00      | 0–3             | 0.00–4.41        |
|            | Apr 26 to May 2, 2021  | 66       | 0–0           | 0.00–0.00      | 0–0             | 0.00–0.00        |
|            | May 3 to May 9, 2021   | 75       | 0–11          | 0.00–17.19     | 0–0             | 0.00–0.00        |
|            | May 10 to May 16, 2021 | 55       | 0–0           | 0.00–0.00      | 0–7             | 0.00–11.29       |
|            | May 17 to May 23, 2021 | 54       | 0–0           | 0.00–0.00      | 0–6             | 0.00–10.00       |
|            | May 24 to May 30, 2021 | 67       | 0–8           | 0.00–13.56     | 0–0             | 0.00–0.00        |
| Iwate      |                        |          |               |                |                 |                  |
|            | Apr 5 to Apr 11, 2021  | 63       | 0–0           | 0.00–0.00      | 0–5             | 0.00–7.35        |
|            | Apr 12 to Apr 18, 2021 | 64       | 0–0           | 0.00–0.00      | 0–3             | 0.00–4.48        |
|            | Apr 19 to Apr 25, 2021 | 66       | 0–0           | 0.00–0.00      | 0–0             | 0.00–0.00        |
|            | Apr 26 to May 2, 2021  | 76       | 0–13          | 0.00–20.63     | 0–0             | 0.00–0.00        |
|            | May 3 to May 9, 2021   | 78       | 0–16          | 0.00–25.81     | 0–0             | 0.00–0.00        |
|            | May 10 to May 16, 2021 | 59       | 0–0           | 0.00–0.00      | 0–1             | 0.00–1.67        |
|            | May 17 to May 23, 2021 | 68       | 0–8           | 0.00–13.33     | 0–0             | 0.00–0.00        |
|            | May 24 to May 30, 2021 | 69       | 0–10          | 0.00–16.95     | 0–0             | 0.00–0.00        |
| Miyagi     |                        |          |               |                |                 |                  |
|            | Apr 5 to Apr 11, 2021  | 104      | 0–9           | 0.00–9.47      | 0–0             | 0.00–0.00        |
|            | Apr 12 to Apr 18, 2021 | 96       | 0–2           | 0.00–2.13      | 0–0             | 0.00–0.00        |
|            | Apr 19 to Apr 25, 2021 | 96       | 0–4           | 0.00–4.35      | 0–0             | 0.00–0.00        |
|            | Apr 26 to May 2, 2021  | 108      | 0–17          | 0.00–18.68     | 0–0             | 0.00–0.00        |
|            | May 3 to May 9, 2021   | 87       | 0–0           | 0.00–0.00      | 0–2             | 0.00–2.25        |

|           |                        |     |      |             |      |            |
|-----------|------------------------|-----|------|-------------|------|------------|
|           | May 10 to May 16, 2021 | 78  | 0-0  | 0.00-0.00   | 0-11 | 0.00-12.36 |
|           | May 17 to May 23, 2021 | 85  | 0-0  | 0.00-0.00   | 0-1  | 0.00-1.16  |
|           | May 24 to May 30, 2021 | 85  | 0-1  | 0.00-1.19   | 0-0  | 0.00-0.00  |
| Akita     |                        |     |      |             |      |            |
|           | Apr 5 to Apr 11, 2021  | 66  | 0-10 | 0.00-17.86  | 0-0  | 0.00-0.00  |
|           | Apr 12 to Apr 18, 2021 | 61  | 0-6  | 0.00-10.91  | 0-0  | 0.00-0.00  |
|           | Apr 19 to Apr 25, 2021 | 56  | 0-1  | 0.00-1.82   | 0-0  | 0.00-0.00  |
|           | Apr 26 to May 2, 2021  | 58  | 0-4  | 0.00-7.41   | 0-0  | 0.00-0.00  |
|           | May 3 to May 9, 2021   | 77  | 8-22 | 14.55-40.00 | 0-0  | 0.00-0.00  |
|           | May 10 to May 16, 2021 | 52  | 0-0  | 0.00-0.00   | 0-2  | 0.00-3.70  |
|           | May 17 to May 23, 2021 | 53  | 0-1  | 0.00-1.92   | 0-0  | 0.00-0.00  |
|           | May 24 to May 30, 2021 | 45  | 0-0  | 0.00-0.00   | 0-6  | 0.00-11.76 |
| Yamagata  |                        |     |      |             |      |            |
|           | Apr 5 to Apr 11, 2021  | 59  | 0-1  | 0.00-1.72   | 0-0  | 0.00-0.00  |
|           | Apr 12 to Apr 18, 2021 | 61  | 0-3  | 0.00-5.17   | 0-0  | 0.00-0.00  |
|           | Apr 19 to Apr 25, 2021 | 63  | 0-5  | 0.00-8.62   | 0-0  | 0.00-0.00  |
|           | Apr 26 to May 2, 2021  | 43  | 0-0  | 0.00-0.00   | 0-13 | 0.00-23.21 |
|           | May 3 to May 9, 2021   | 55  | 0-1  | 0.00-1.85   | 0-0  | 0.00-0.00  |
|           | May 10 to May 16, 2021 | 60  | 0-7  | 0.00-13.21  | 0-0  | 0.00-0.00  |
|           | May 17 to May 23, 2021 | 51  | 0-0  | 0.00-0.00   | 0-0  | 0.00-0.00  |
|           | May 24 to May 30, 2021 | 49  | 0-0  | 0.00-0.00   | 0-2  | 0.00-3.92  |
| Fukushima |                        |     |      |             |      |            |
|           | Apr 5 to Apr 11, 2021  | 95  | 0-9  | 0.00-10.47  | 0-0  | 0.00-0.00  |
|           | Apr 12 to Apr 18, 2021 | 93  | 0-8  | 0.00-9.41   | 0-0  | 0.00-0.00  |
|           | Apr 19 to Apr 25, 2021 | 104 | 0-19 | 0.00-22.35  | 0-0  | 0.00-0.00  |
|           | Apr 26 to May 2, 2021  | 88  | 0-5  | 0.00-6.02   | 0-0  | 0.00-0.00  |
|           | May 3 to May 9, 2021   | 94  | 0-12 | 0.00-14.63  | 0-0  | 0.00-0.00  |
|           | May 10 to May 16, 2021 | 85  | 0-5  | 0.00-6.25   | 0-0  | 0.00-0.00  |
|           | May 17 to May 23, 2021 | 97  | 0-18 | 0.00-22.78  | 0-0  | 0.00-0.00  |
|           | May 24 to May 30, 2021 | 83  | 0-5  | 0.00-6.41   | 0-0  | 0.00-0.00  |
| Ibaraki   |                        |     |      |             |      |            |
|           | Apr 5 to Apr 11, 2021  | 126 | 0-5  | 0.00-4.13   | 0-0  | 0.00-0.00  |
|           | Apr 12 to Apr 18, 2021 | 136 | 0-19 | 0.00-16.24  | 0-0  | 0.00-0.00  |
|           | Apr 19 to Apr 25, 2021 | 121 | 0-8  | 0.00-7.08   | 0-0  | 0.00-0.00  |
|           | Apr 26 to May 2, 2021  | 119 | 0-10 | 0.00-9.17   | 0-0  | 0.00-0.00  |
|           | May 3 to May 9, 2021   | 126 | 0-18 | 0.00-16.67  | 0-0  | 0.00-0.00  |
|           | May 10 to May 16, 2021 | 133 | 3-24 | 2.75-22.02  | 0-0  | 0.00-0.00  |
|           | May 17 to May 23, 2021 | 98  | 0-0  | 0.00-0.00   | 0-8  | 0.00-7.55  |
|           | May 24 to May 30, 2021 | 104 | 0-0  | 0.00-0.00   | 0-1  | 0.00-0.95  |
| Tochigi   |                        |     |      |             |      |            |
|           | Apr 5 to Apr 11, 2021  | 79  | 0-3  | 0.00-3.95   | 0-0  | 0.00-0.00  |
|           | Apr 12 to Apr 18, 2021 | 98  | 7-24 | 9.46-32.43  | 0-0  | 0.00-0.00  |
|           | Apr 19 to Apr 25, 2021 | 73  | 0-0  | 0.00-0.00   | 0-0  | 0.00-0.00  |
|           | Apr 26 to May 2, 2021  | 81  | 0-10 | 0.00-14.08  | 0-0  | 0.00-0.00  |
|           | May 3 to May 9, 2021   | 83  | 0-14 | 0.00-20.29  | 0-0  | 0.00-0.00  |
|           | May 10 to May 16, 2021 | 70  | 0-3  | 0.00-4.48   | 0-0  | 0.00-0.00  |



|          |                        |     |       |            |      |           |
|----------|------------------------|-----|-------|------------|------|-----------|
|          | May 17 to May 23, 2021 | 74  | 0-8   | 0.00-12.12 | 0-0  | 0.00-0.00 |
|          | May 24 to May 30, 2021 | 58  | 0-0   | 0.00-0.00  | 0-6  | 0.00-9.38 |
| Gunma    |                        |     |       |            |      |           |
|          | Apr 5 to Apr 11, 2021  | 81  | 0-0   | 0.00-0.00  | 0-2  | 0.00-2.41 |
|          | Apr 12 to Apr 18, 2021 | 100 | 1-19  | 1.23-23.46 | 0-0  | 0.00-0.00 |
|          | Apr 19 to Apr 25, 2021 | 76  | 0-0   | 0.00-0.00  | 0-2  | 0.00-2.56 |
|          | Apr 26 to May 2, 2021  | 88  | 0-11  | 0.00-14.29 | 0-0  | 0.00-0.00 |
|          | May 3 to May 9, 2021   | 85  | 0-10  | 0.00-13.33 | 0-0  | 0.00-0.00 |
|          | May 10 to May 16, 2021 | 94  | 2-20  | 2.70-27.03 | 0-0  | 0.00-0.00 |
|          | May 17 to May 23, 2021 | 81  | 0-7   | 0.00-9.46  | 0-0  | 0.00-0.00 |
|          | May 24 to May 30, 2021 | 83  | 0-10  | 0.00-13.70 | 0-0  | 0.00-0.00 |
| Saitama  |                        |     |       |            |      |           |
|          | Apr 5 to Apr 11, 2021  | 243 | 0-8   | 0.00-3.40  | 0-0  | 0.00-0.00 |
|          | Apr 12 to Apr 18, 2021 | 235 | 0-5   | 0.00-2.17  | 0-0  | 0.00-0.00 |
|          | Apr 19 to Apr 25, 2021 | 255 | 0-29  | 0.00-12.83 | 0-0  | 0.00-0.00 |
|          | Apr 26 to May 2, 2021  | 268 | 11-45 | 4.93-20.18 | 0-0  | 0.00-0.00 |
|          | May 3 to May 9, 2021   | 264 | 10-46 | 4.59-21.10 | 0-0  | 0.00-0.00 |
|          | May 10 to May 16, 2021 | 238 | 0-24  | 0.00-11.21 | 0-0  | 0.00-0.00 |
|          | May 17 to May 23, 2021 | 208 | 0-0   | 0.00-0.00  | 0-1  | 0.00-0.48 |
|          | May 24 to May 30, 2021 | 225 | 0-20  | 0.00-9.76  | 0-0  | 0.00-0.00 |
| Chiba    |                        |     |       |            |      |           |
|          | Apr 5 to Apr 11, 2021  | 256 | 8-41  | 3.72-19.07 | 0-0  | 0.00-0.00 |
|          | Apr 12 to Apr 18, 2021 | 233 | 0-25  | 0.00-12.02 | 0-0  | 0.00-0.00 |
|          | Apr 19 to Apr 25, 2021 | 228 | 0-25  | 0.00-12.32 | 0-0  | 0.00-0.00 |
|          | Apr 26 to May 2, 2021  | 244 | 12-44 | 6.00-22.00 | 0-0  | 0.00-0.00 |
|          | May 3 to May 9, 2021   | 221 | 0-27  | 0.00-13.92 | 0-0  | 0.00-0.00 |
|          | May 10 to May 16, 2021 | 213 | 0-20  | 0.00-10.36 | 0-0  | 0.00-0.00 |
|          | May 17 to May 23, 2021 | 209 | 0-19  | 0.00-10.00 | 0-0  | 0.00-0.00 |
|          | May 24 to May 30, 2021 | 192 | 0-5   | 0.00-2.67  | 0-0  | 0.00-0.00 |
| Tokyo    |                        |     |       |            |      |           |
|          | Apr 5 to Apr 11, 2021  | 427 | 0-36  | 0.00-9.21  | 0-0  | 0.00-0.00 |
|          | Apr 12 to Apr 18, 2021 | 400 | 0-16  | 0.00-4.17  | 0-0  | 0.00-0.00 |
|          | Apr 19 to Apr 25, 2021 | 412 | 0-33  | 0.00-8.71  | 0-0  | 0.00-0.00 |
|          | Apr 26 to May 2, 2021  | 413 | 0-47  | 0.00-12.84 | 0-0  | 0.00-0.00 |
|          | May 3 to May 9, 2021   | 389 | 0-28  | 0.00-7.76  | 0-0  | 0.00-0.00 |
|          | May 10 to May 16, 2021 | 361 | 0-9   | 0.00-2.56  | 0-0  | 0.00-0.00 |
|          | May 17 to May 23, 2021 | 333 | 0-0   | 0.00-0.00  | 0-12 | 0.00-3.48 |
|          | May 24 to May 30, 2021 | 334 | 0-0   | 0.00-0.00  | 0-6  | 0.00-1.76 |
| Kanagawa |                        |     |       |            |      |           |
|          | Apr 5 to Apr 11, 2021  | 269 | 0-6   | 0.00-2.28  | 0-0  | 0.00-0.00 |
|          | Apr 12 to Apr 18, 2021 | 287 | 0-31  | 0.00-12.11 | 0-0  | 0.00-0.00 |
|          | Apr 19 to Apr 25, 2021 | 266 | 0-16  | 0.00-6.40  | 0-0  | 0.00-0.00 |
|          | Apr 26 to May 2, 2021  | 279 | 3-35  | 1.23-14.34 | 0-0  | 0.00-0.00 |
|          | May 3 to May 9, 2021   | 268 | 0-28  | 0.00-11.67 | 0-0  | 0.00-0.00 |
|          | May 10 to May 16, 2021 | 232 | 0-0   | 0.00-0.00  | 0-6  | 0.00-2.52 |
|          | May 17 to May 23, 2021 | 280 | 17-48 | 7.33-20.69 | 0-0  | 0.00-0.00 |

|                        |                        |     |           |             |           |            |
|------------------------|------------------------|-----|-----------|-------------|-----------|------------|
| Niigata                | May 24 to May 30, 2021 | 249 | 0-21      | 0.00-9.21   | 0-0       | 0.00-0.00  |
|                        | Apr 5 to Apr 11, 2021  | 97  | 0-0       | 0.00-0.00   | 0-9       | 0.00-8.49  |
|                        | Apr 12 to Apr 18, 2021 | 104 | 0-0       | 0.00-0.00   | 0-2       | 0.00-1.89  |
|                        | Apr 19 to Apr 25, 2021 | 109 | 0-5       | 0.00-4.81   | 0-0       | 0.00-0.00  |
|                        | Apr 26 to May 2, 2021  | 112 | 0-10      | 0.00-9.80   | 0-0       | 0.00-0.00  |
|                        | May 3 to May 9, 2021   | 106 | 0-6       | 0.00-6.00   | 0-0       | 0.00-0.00  |
|                        | May 10 to May 16, 2021 | 86  | 0-0       | 0.00-0.00   | 0-12      | 0.00-12.24 |
|                        | May 17 to May 23, 2021 | 91  | 0-0       | 0.00-0.00   | 0-6       | 0.00-6.19  |
| May 24 to May 30, 2021 | 89                     | 0-0 | 0.00-0.00 | 0-7         | 0.00-7.29 |            |
| Toyama                 | Apr 5 to Apr 11, 2021  | 62  | 4-18      | 9.09-40.91  | 0-0       | 0.00-0.00  |
|                        | Apr 12 to Apr 18, 2021 | 56  | 0-12      | 0.00-27.27  | 0-0       | 0.00-0.00  |
|                        | Apr 19 to Apr 25, 2021 | 39  | 0-0       | 0.00-0.00   | 0-3       | 0.00-7.14  |
|                        | Apr 26 to May 2, 2021  | 49  | 0-8       | 0.00-19.51  | 0-0       | 0.00-0.00  |
|                        | May 3 to May 9, 2021   | 45  | 0-5       | 0.00-12.50  | 0-0       | 0.00-0.00  |
|                        | May 10 to May 16, 2021 | 40  | 0-0       | 0.00-0.00   | 0-0       | 0.00-0.00  |
|                        | May 17 to May 23, 2021 | 38  | 0-0       | 0.00-0.00   | 0-0       | 0.00-0.00  |
|                        | May 24 to May 30, 2021 | 45  | 0-8       | 0.00-21.62  | 0-0       | 0.00-0.00  |
| Ishikawa               | Apr 5 to Apr 11, 2021  | 49  | 0-1       | 0.00-2.08   | 0-0       | 0.00-0.00  |
|                        | Apr 12 to Apr 18, 2021 | 52  | 0-5       | 0.00-10.64  | 0-0       | 0.00-0.00  |
|                        | Apr 19 to Apr 25, 2021 | 51  | 0-6       | 0.00-13.33  | 0-0       | 0.00-0.00  |
|                        | Apr 26 to May 2, 2021  | 55  | 0-13      | 0.00-30.95  | 0-0       | 0.00-0.00  |
|                        | May 3 to May 9, 2021   | 59  | 5-19      | 12.50-47.50 | 0-0       | 0.00-0.00  |
|                        | May 10 to May 16, 2021 | 53  | 0-13      | 0.00-32.50  | 0-0       | 0.00-0.00  |
|                        | May 17 to May 23, 2021 | 40  | 0-1       | 0.00-2.56   | 0-0       | 0.00-0.00  |
|                        | May 24 to May 30, 2021 | 51  | 0-13      | 0.00-34.21  | 0-0       | 0.00-0.00  |
| Fukui                  | Apr 5 to Apr 11, 2021  | 29  | 0-0       | 0.00-0.00   | 0-4       | 0.00-12.12 |
|                        | Apr 12 to Apr 18, 2021 | 41  | 0-9       | 0.00-28.13  | 0-0       | 0.00-0.00  |
|                        | Apr 19 to Apr 25, 2021 | 34  | 0-2       | 0.00-6.25   | 0-0       | 0.00-0.00  |
|                        | Apr 26 to May 2, 2021  | 46  | 4-15      | 12.90-48.39 | 0-0       | 0.00-0.00  |
|                        | May 3 to May 9, 2021   | 40  | 0-10      | 0.00-33.33  | 0-0       | 0.00-0.00  |
|                        | May 10 to May 16, 2021 | 27  | 0-0       | 0.00-0.00   | 0-3       | 0.00-10.00 |
|                        | May 17 to May 23, 2021 | 32  | 0-2       | 0.00-6.67   | 0-0       | 0.00-0.00  |
|                        | May 24 to May 30, 2021 | 36  | 0-7       | 0.00-24.14  | 0-0       | 0.00-0.00  |
| Yamanashi              | Apr 5 to Apr 11, 2021  | 26  | 0-0       | 0.00-0.00   | 0-11      | 0.00-29.73 |
|                        | Apr 12 to Apr 18, 2021 | 49  | 0-13      | 0.00-36.11  | 0-0       | 0.00-0.00  |
|                        | Apr 19 to Apr 25, 2021 | 40  | 0-6       | 0.00-17.65  | 0-0       | 0.00-0.00  |
|                        | Apr 26 to May 2, 2021  | 30  | 0-0       | 0.00-0.00   | 0-4       | 0.00-11.76 |
|                        | May 3 to May 9, 2021   | 30  | 0-0       | 0.00-0.00   | 0-3       | 0.00-9.09  |
|                        | May 10 to May 16, 2021 | 40  | 0-8       | 0.00-25.00  | 0-0       | 0.00-0.00  |
|                        | May 17 to May 23, 2021 | 33  | 0-1       | 0.00-3.13   | 0-0       | 0.00-0.00  |
|                        | May 24 to May 30, 2021 | 32  | 0-1       | 0.00-3.23   | 0-0       | 0.00-0.00  |

Nagano

|                        |    |     |           |      |            |
|------------------------|----|-----|-----------|------|------------|
| Apr 5 to Apr 11, 2021  | 86 | 0-0 | 0.00-0.00 | 0-7  | 0.00-7.53  |
| Apr 12 to Apr 18, 2021 | 78 | 0-0 | 0.00-0.00 | 0-14 | 0.00-15.22 |
| Apr 19 to Apr 25, 2021 | 83 | 0-0 | 0.00-0.00 | 0-8  | 0.00-8.79  |
| Apr 26 to May 2, 2021  | 89 | 0-1 | 0.00-1.14 | 0-0  | 0.00-0.00  |
| May 3 to May 9, 2021   | 91 | 0-4 | 0.00-4.60 | 0-0  | 0.00-0.00  |
| May 10 to May 16, 2021 | 93 | 0-7 | 0.00-8.14 | 0-0  | 0.00-0.00  |
| May 17 to May 23, 2021 | 67 | 0-0 | 0.00-0.00 | 0-16 | 0.00-19.28 |
| May 24 to May 30, 2021 | 70 | 0-0 | 0.00-0.00 | 0-10 | 0.00-12.50 |

Gifu

|                        |    |      |            |     |           |
|------------------------|----|------|------------|-----|-----------|
| Apr 5 to Apr 11, 2021  | 76 | 0-0  | 0.00-0.00  | 0-0 | 0.00-0.00 |
| Apr 12 to Apr 18, 2021 | 76 | 0-2  | 0.00-2.70  | 0-0 | 0.00-0.00 |
| Apr 19 to Apr 25, 2021 | 92 | 1-20 | 1.39-27.78 | 0-0 | 0.00-0.00 |
| Apr 26 to May 2, 2021  | 71 | 0-3  | 0.00-4.41  | 0-0 | 0.00-0.00 |
| May 3 to May 9, 2021   | 64 | 0-0  | 0.00-0.00  | 0-3 | 0.00-4.48 |
| May 10 to May 16, 2021 | 73 | 0-8  | 0.00-12.31 | 0-0 | 0.00-0.00 |
| May 17 to May 23, 2021 | 74 | 0-11 | 0.00-17.46 | 0-0 | 0.00-0.00 |
| May 24 to May 30, 2021 | 70 | 0-6  | 0.00-9.38  | 0-0 | 0.00-0.00 |

Shizuoka

|                        |     |      |            |     |           |
|------------------------|-----|------|------------|-----|-----------|
| Apr 5 to Apr 11, 2021  | 143 | 0-11 | 0.00-8.33  | 0-0 | 0.00-0.00 |
| Apr 12 to Apr 18, 2021 | 154 | 0-22 | 0.00-16.67 | 0-0 | 0.00-0.00 |
| Apr 19 to Apr 25, 2021 | 139 | 0-10 | 0.00-7.75  | 0-0 | 0.00-0.00 |
| Apr 26 to May 2, 2021  | 139 | 0-13 | 0.00-10.32 | 0-0 | 0.00-0.00 |
| May 3 to May 9, 2021   | 117 | 0-0  | 0.00-0.00  | 0-5 | 0.00-4.10 |
| May 10 to May 16, 2021 | 132 | 0-12 | 0.00-10.00 | 0-0 | 0.00-0.00 |
| May 17 to May 23, 2021 | 116 | 0-0  | 0.00-0.00  | 0-2 | 0.00-1.69 |
| May 24 to May 30, 2021 | 119 | 0-2  | 0.00-1.71  | 0-0 | 0.00-0.00 |

Aichi

|                        |     |      |            |     |           |
|------------------------|-----|------|------------|-----|-----------|
| Apr 5 to Apr 11, 2021  | 214 | 0-2  | 0.00-0.94  | 0-0 | 0.00-0.00 |
| Apr 12 to Apr 18, 2021 | 203 | 0-0  | 0.00-0.00  | 0-5 | 0.00-2.40 |
| Apr 19 to Apr 25, 2021 | 235 | 0-30 | 0.00-14.63 | 0-0 | 0.00-0.00 |
| Apr 26 to May 2, 2021  | 218 | 0-18 | 0.00-9.00  | 0-0 | 0.00-0.00 |
| May 3 to May 9, 2021   | 198 | 0-1  | 0.00-0.51  | 0-0 | 0.00-0.00 |
| May 10 to May 16, 2021 | 214 | 0-24 | 0.00-12.63 | 0-0 | 0.00-0.00 |
| May 17 to May 23, 2021 | 176 | 0-0  | 0.00-0.00  | 0-9 | 0.00-4.86 |
| May 24 to May 30, 2021 | 189 | 0-7  | 0.00-3.85  | 0-0 | 0.00-0.00 |

Mie

|                        |    |      |             |     |            |
|------------------------|----|------|-------------|-----|------------|
| Apr 5 to Apr 11, 2021  | 74 | 0-6  | 0.00-8.82   | 0-0 | 0.00-0.00  |
| Apr 12 to Apr 18, 2021 | 60 | 0-0  | 0.00-0.00   | 0-5 | 0.00-7.69  |
| Apr 19 to Apr 25, 2021 | 56 | 0-0  | 0.00-0.00   | 0-7 | 0.00-11.11 |
| Apr 26 to May 2, 2021  | 85 | 7-25 | 11.67-41.67 | 0-0 | 0.00-0.00  |
| May 3 to May 9, 2021   | 54 | 0-0  | 0.00-0.00   | 0-5 | 0.00-8.47  |
| May 10 to May 16, 2021 | 62 | 0-5  | 0.00-8.77   | 0-0 | 0.00-0.00  |
| May 17 to May 23, 2021 | 61 | 0-5  | 0.00-8.93   | 0-0 | 0.00-0.00  |
| May 24 to May 30, 2021 | 55 | 0-0  | 0.00-0.00   | 0-0 | 0.00-0.00  |

Shiga

|          |                        |     |      |            |     |            |
|----------|------------------------|-----|------|------------|-----|------------|
|          | Apr 5 to Apr 11, 2021  | 48  | 0-3  | 0.00-6.67  | 0-0 | 0.00-0.00  |
|          | Apr 12 to Apr 18, 2021 | 54  | 0-10 | 0.00-22.73 | 0-0 | 0.00-0.00  |
|          | Apr 19 to Apr 25, 2021 | 40  | 0-0  | 0.00-0.00  | 0-3 | 0.00-6.98  |
|          | Apr 26 to May 2, 2021  | 38  | 0-0  | 0.00-0.00  | 0-4 | 0.00-9.52  |
|          | May 3 to May 9, 2021   | 47  | 0-6  | 0.00-14.63 | 0-0 | 0.00-0.00  |
|          | May 10 to May 16, 2021 | 31  | 0-0  | 0.00-0.00  | 0-8 | 0.00-20.51 |
|          | May 17 to May 23, 2021 | 38  | 0-1  | 0.00-2.70  | 0-0 | 0.00-0.00  |
|          | May 24 to May 30, 2021 | 46  | 0-11 | 0.00-31.43 | 0-0 | 0.00-0.00  |
| Kyoto    |                        |     |      |            |     |            |
|          | Apr 5 to Apr 11, 2021  | 112 | 2-22 | 2.22-24.44 | 0-0 | 0.00-0.00  |
|          | Apr 12 to Apr 18, 2021 | 93  | 0-5  | 0.00-5.68  | 0-0 | 0.00-0.00  |
|          | Apr 19 to Apr 25, 2021 | 98  | 0-10 | 0.00-11.36 | 0-0 | 0.00-0.00  |
|          | Apr 26 to May 2, 2021  | 112 | 6-26 | 6.98-30.23 | 0-0 | 0.00-0.00  |
|          | May 3 to May 9, 2021   | 92  | 0-9  | 0.00-10.84 | 0-0 | 0.00-0.00  |
|          | May 10 to May 16, 2021 | 83  | 0-3  | 0.00-3.75  | 0-0 | 0.00-0.00  |
|          | May 17 to May 23, 2021 | 93  | 0-13 | 0.00-16.25 | 0-0 | 0.00-0.00  |
|          | May 24 to May 30, 2021 | 84  | 0-6  | 0.00-7.69  | 0-0 | 0.00-0.00  |
| Osaka    |                        |     |      |            |     |            |
|          | Apr 5 to Apr 11, 2021  | 271 | 0-0  | 0.00-0.00  | 0-4 | 0.00-1.45  |
|          | Apr 12 to Apr 18, 2021 | 282 | 0-8  | 0.00-2.92  | 0-0 | 0.00-0.00  |
|          | Apr 19 to Apr 25, 2021 | 310 | 6-43 | 2.25-16.10 | 0-0 | 0.00-0.00  |
|          | Apr 26 to May 2, 2021  | 261 | 0-0  | 0.00-0.00  | 0-0 | 0.00-0.00  |
|          | May 3 to May 9, 2021   | 294 | 1-39 | 0.39-15.29 | 0-0 | 0.00-0.00  |
|          | May 10 to May 16, 2021 | 251 | 0-0  | 0.00-0.00  | 0-0 | 0.00-0.00  |
|          | May 17 to May 23, 2021 | 263 | 0-14 | 0.00-5.62  | 0-0 | 0.00-0.00  |
|          | May 24 to May 30, 2021 | 253 | 0-10 | 0.00-4.12  | 0-0 | 0.00-0.00  |
| Hyogo    |                        |     |      |            |     |            |
|          | Apr 5 to Apr 11, 2021  | 200 | 0-21 | 0.00-11.73 | 0-0 | 0.00-0.00  |
|          | Apr 12 to Apr 18, 2021 | 187 | 0-12 | 0.00-6.86  | 0-0 | 0.00-0.00  |
|          | Apr 19 to Apr 25, 2021 | 197 | 0-27 | 0.00-15.88 | 0-0 | 0.00-0.00  |
|          | Apr 26 to May 2, 2021  | 186 | 0-21 | 0.00-12.73 | 0-0 | 0.00-0.00  |
|          | May 3 to May 9, 2021   | 186 | 0-24 | 0.00-14.81 | 0-0 | 0.00-0.00  |
|          | May 10 to May 16, 2021 | 191 | 3-31 | 1.88-19.38 | 0-0 | 0.00-0.00  |
|          | May 17 to May 23, 2021 | 174 | 0-17 | 0.00-10.83 | 0-0 | 0.00-0.00  |
|          | May 24 to May 30, 2021 | 173 | 0-17 | 0.00-10.90 | 0-0 | 0.00-0.00  |
| Nara     |                        |     |      |            |     |            |
|          | Apr 5 to Apr 11, 2021  | 40  | 0-0  | 0.00-0.00  | 0-6 | 0.00-13.04 |
|          | Apr 12 to Apr 18, 2021 | 60  | 3-16 | 6.82-36.36 | 0-0 | 0.00-0.00  |
|          | Apr 19 to Apr 25, 2021 | 49  | 0-6  | 0.00-13.95 | 0-0 | 0.00-0.00  |
|          | Apr 26 to May 2, 2021  | 36  | 0-0  | 0.00-0.00  | 0-6 | 0.00-14.29 |
|          | May 3 to May 9, 2021   | 44  | 0-3  | 0.00-7.32  | 0-0 | 0.00-0.00  |
|          | May 10 to May 16, 2021 | 38  | 0-0  | 0.00-0.00  | 0-3 | 0.00-7.32  |
|          | May 17 to May 23, 2021 | 44  | 0-4  | 0.00-10.00 | 0-0 | 0.00-0.00  |
|          | May 24 to May 30, 2021 | 43  | 0-4  | 0.00-10.26 | 0-0 | 0.00-0.00  |
| Wakayama |                        |     |      |            |     |            |
|          | Apr 5 to Apr 11, 2021  | 48  | 0-8  | 0.00-20.00 | 0-0 | 0.00-0.00  |

|           |                        |     |      |            |     |            |
|-----------|------------------------|-----|------|------------|-----|------------|
|           | Apr 12 to Apr 18, 2021 | 33  | 0-0  | 0.00-0.00  | 0-7 | 0.00-17.50 |
|           | Apr 19 to Apr 25, 2021 | 38  | 0-0  | 0.00-0.00  | 0-1 | 0.00-2.56  |
|           | Apr 26 to May 2, 2021  | 31  | 0-0  | 0.00-0.00  | 0-6 | 0.00-16.22 |
|           | May 3 to May 9, 2021   | 37  | 0-2  | 0.00-5.71  | 0-0 | 0.00-0.00  |
|           | May 10 to May 16, 2021 | 45  | 0-11 | 0.00-32.35 | 0-0 | 0.00-0.00  |
|           | May 17 to May 23, 2021 | 39  | 0-6  | 0.00-18.18 | 0-0 | 0.00-0.00  |
|           | May 24 to May 30, 2021 | 32  | 0-0  | 0.00-0.00  | 0-0 | 0.00-0.00  |
| Tottori   |                        |     |      |            |     |            |
|           | Apr 5 to Apr 11, 2021  | 17  | 0-0  | 0.00-0.00  | 0-6 | 0.00-26.09 |
|           | Apr 12 to Apr 18, 2021 | 22  | 0-0  | 0.00-0.00  | 0-0 | 0.00-0.00  |
|           | Apr 19 to Apr 25, 2021 | 20  | 0-0  | 0.00-0.00  | 0-2 | 0.00-9.09  |
|           | Apr 26 to May 2, 2021  | 21  | 0-0  | 0.00-0.00  | 0-1 | 0.00-4.55  |
|           | May 3 to May 9, 2021   | 26  | 0-4  | 0.00-18.18 | 0-0 | 0.00-0.00  |
|           | May 10 to May 16, 2021 | 25  | 0-4  | 0.00-19.05 | 0-0 | 0.00-0.00  |
|           | May 17 to May 23, 2021 | 14  | 0-0  | 0.00-0.00  | 0-6 | 0.00-30.00 |
|           | May 24 to May 30, 2021 | 21  | 0-2  | 0.00-10.53 | 0-0 | 0.00-0.00  |
| Shimane   |                        |     |      |            |     |            |
|           | Apr 5 to Apr 11, 2021  | 26  | 0-0  | 0.00-0.00  | 0-5 | 0.00-16.13 |
|           | Apr 12 to Apr 18, 2021 | 36  | 0-5  | 0.00-16.13 | 0-0 | 0.00-0.00  |
|           | Apr 19 to Apr 25, 2021 | 25  | 0-0  | 0.00-0.00  | 0-6 | 0.00-19.35 |
|           | Apr 26 to May 2, 2021  | 28  | 0-0  | 0.00-0.00  | 0-2 | 0.00-6.67  |
|           | May 3 to May 9, 2021   | 30  | 0-1  | 0.00-3.45  | 0-0 | 0.00-0.00  |
|           | May 10 to May 16, 2021 | 31  | 0-3  | 0.00-10.71 | 0-0 | 0.00-0.00  |
|           | May 17 to May 23, 2021 | 37  | 0-10 | 0.00-37.04 | 0-0 | 0.00-0.00  |
|           | May 24 to May 30, 2021 | 21  | 0-0  | 0.00-0.00  | 0-5 | 0.00-19.23 |
| Okayama   |                        |     |      |            |     |            |
|           | Apr 5 to Apr 11, 2021  | 77  | 0-5  | 0.00-6.94  | 0-0 | 0.00-0.00  |
|           | Apr 12 to Apr 18, 2021 | 74  | 0-3  | 0.00-4.23  | 0-0 | 0.00-0.00  |
|           | Apr 19 to Apr 25, 2021 | 78  | 0-9  | 0.00-13.04 | 0-0 | 0.00-0.00  |
|           | Apr 26 to May 2, 2021  | 76  | 0-8  | 0.00-11.76 | 0-0 | 0.00-0.00  |
|           | May 3 to May 9, 2021   | 69  | 0-1  | 0.00-1.47  | 0-0 | 0.00-0.00  |
|           | May 10 to May 16, 2021 | 63  | 0-0  | 0.00-0.00  | 0-4 | 0.00-5.97  |
|           | May 17 to May 23, 2021 | 71  | 0-6  | 0.00-9.23  | 0-0 | 0.00-0.00  |
|           | May 24 to May 30, 2021 | 69  | 0-7  | 0.00-11.29 | 0-0 | 0.00-0.00  |
| Hiroshima |                        |     |      |            |     |            |
|           | Apr 5 to Apr 11, 2021  | 120 | 0-19 | 0.00-18.81 | 0-0 | 0.00-0.00  |
|           | Apr 12 to Apr 18, 2021 | 115 | 0-14 | 0.00-13.86 | 0-0 | 0.00-0.00  |
|           | Apr 19 to Apr 25, 2021 | 111 | 0-12 | 0.00-12.12 | 0-0 | 0.00-0.00  |
|           | Apr 26 to May 2, 2021  | 108 | 0-10 | 0.00-10.20 | 0-0 | 0.00-0.00  |
|           | May 3 to May 9, 2021   | 116 | 0-18 | 0.00-18.37 | 0-0 | 0.00-0.00  |
|           | May 10 to May 16, 2021 | 113 | 0-17 | 0.00-17.71 | 0-0 | 0.00-0.00  |
|           | May 17 to May 23, 2021 | 100 | 0-9  | 0.00-9.89  | 0-0 | 0.00-0.00  |
|           | May 24 to May 30, 2021 | 100 | 0-10 | 0.00-11.11 | 0-0 | 0.00-0.00  |
| Yamaguchi |                        |     |      |            |     |            |
|           | Apr 5 to Apr 11, 2021  | 59  | 0-0  | 0.00-0.00  | 0-8 | 0.00-11.94 |
|           | Apr 12 to Apr 18, 2021 | 88  | 3-21 | 4.48-31.34 | 0-0 | 0.00-0.00  |

|           |                        |     |      |             |      |            |
|-----------|------------------------|-----|------|-------------|------|------------|
|           | Apr 19 to Apr 25, 2021 | 71  | 0-5  | 0.00-7.58   | 0-0  | 0.00-0.00  |
|           | Apr 26 to May 2, 2021  | 50  | 0-0  | 0.00-0.00   | 0-15 | 0.00-23.08 |
|           | May 3 to May 9, 2021   | 72  | 0-8  | 0.00-12.50  | 0-0  | 0.00-0.00  |
|           | May 10 to May 16, 2021 | 54  | 0-0  | 0.00-0.00   | 0-8  | 0.00-12.90 |
|           | May 17 to May 23, 2021 | 61  | 0-1  | 0.00-1.67   | 0-0  | 0.00-0.00  |
|           | May 24 to May 30, 2021 | 69  | 0-11 | 0.00-18.97  | 0-0  | 0.00-0.00  |
| Tokushima |                        |     |      |             |      |            |
|           | Apr 5 to Apr 11, 2021  | 37  | 0-3  | 0.00-8.82   | 0-0  | 0.00-0.00  |
|           | Apr 12 to Apr 18, 2021 | 29  | 0-0  | 0.00-0.00   | 0-6  | 0.00-17.14 |
|           | Apr 19 to Apr 25, 2021 | 47  | 2-14 | 6.06-42.42  | 0-0  | 0.00-0.00  |
|           | Apr 26 to May 2, 2021  | 30  | 0-0  | 0.00-0.00   | 0-3  | 0.00-9.09  |
|           | May 3 to May 9, 2021   | 50  | 6-18 | 18.75-56.25 | 0-0  | 0.00-0.00  |
|           | May 10 to May 16, 2021 | 45  | 2-13 | 6.25-40.63  | 0-0  | 0.00-0.00  |
|           | May 17 to May 23, 2021 | 22  | 0-0  | 0.00-0.00   | 0-8  | 0.00-26.67 |
|           | May 24 to May 30, 2021 | 42  | 3-13 | 10.34-44.83 | 0-0  | 0.00-0.00  |
| Kagawa    |                        |     |      |             |      |            |
|           | Apr 5 to Apr 11, 2021  | 40  | 0-0  | 0.00-0.00   | 0-0  | 0.00-0.00  |
|           | Apr 12 to Apr 18, 2021 | 41  | 0-1  | 0.00-2.50   | 0-0  | 0.00-0.00  |
|           | Apr 19 to Apr 25, 2021 | 35  | 0-0  | 0.00-0.00   | 0-3  | 0.00-7.89  |
|           | Apr 26 to May 2, 2021  | 47  | 0-10 | 0.00-27.03  | 0-0  | 0.00-0.00  |
|           | May 3 to May 9, 2021   | 30  | 0-0  | 0.00-0.00   | 0-5  | 0.00-14.29 |
|           | May 10 to May 16, 2021 | 39  | 0-4  | 0.00-11.43  | 0-0  | 0.00-0.00  |
|           | May 17 to May 23, 2021 | 24  | 0-0  | 0.00-0.00   | 0-10 | 0.00-29.41 |
|           | May 24 to May 30, 2021 | 39  | 0-6  | 0.00-18.18  | 0-0  | 0.00-0.00  |
| Ehime     |                        |     |      |             |      |            |
|           | Apr 5 to Apr 11, 2021  | 64  | 0-0  | 0.00-0.00   | 0-1  | 0.00-1.54  |
|           | Apr 12 to Apr 18, 2021 | 75  | 0-11 | 0.00-17.19  | 0-0  | 0.00-0.00  |
|           | Apr 19 to Apr 25, 2021 | 59  | 0-0  | 0.00-0.00   | 0-4  | 0.00-6.35  |
|           | Apr 26 to May 2, 2021  | 74  | 0-13 | 0.00-21.31  | 0-0  | 0.00-0.00  |
|           | May 3 to May 9, 2021   | 71  | 0-12 | 0.00-20.34  | 0-0  | 0.00-0.00  |
|           | May 10 to May 16, 2021 | 81  | 8-23 | 13.79-39.66 | 0-0  | 0.00-0.00  |
|           | May 17 to May 23, 2021 | 66  | 0-10 | 0.00-17.86  | 0-0  | 0.00-0.00  |
|           | May 24 to May 30, 2021 | 73  | 3-18 | 5.45-32.73  | 0-0  | 0.00-0.00  |
| Kochi     |                        |     |      |             |      |            |
|           | Apr 5 to Apr 11, 2021  | 36  | 0-0  | 0.00-0.00   | 0-3  | 0.00-7.69  |
|           | Apr 12 to Apr 18, 2021 | 47  | 0-8  | 0.00-20.51  | 0-0  | 0.00-0.00  |
|           | Apr 19 to Apr 25, 2021 | 43  | 0-5  | 0.00-13.16  | 0-0  | 0.00-0.00  |
|           | Apr 26 to May 2, 2021  | 38  | 0-0  | 0.00-0.00   | 0-0  | 0.00-0.00  |
|           | May 3 to May 9, 2021   | 36  | 0-0  | 0.00-0.00   | 0-1  | 0.00-2.70  |
|           | May 10 to May 16, 2021 | 39  | 0-3  | 0.00-8.33   | 0-0  | 0.00-0.00  |
|           | May 17 to May 23, 2021 | 32  | 0-0  | 0.00-0.00   | 0-3  | 0.00-8.57  |
|           | May 24 to May 30, 2021 | 39  | 0-5  | 0.00-14.71  | 0-0  | 0.00-0.00  |
| Fukuoka   |                        |     |      |             |      |            |
|           | Apr 5 to Apr 11, 2021  | 163 | 0-0  | 0.00-0.00   | 0-21 | 0.00-11.41 |
|           | Apr 12 to Apr 18, 2021 | 181 | 0-1  | 0.00-0.56   | 0-0  | 0.00-0.00  |
|           | Apr 19 to Apr 25, 2021 | 200 | 0-22 | 0.00-12.36  | 0-0  | 0.00-0.00  |

|          |                        |     |      |            |      |            |
|----------|------------------------|-----|------|------------|------|------------|
|          | Apr 26 to May 2, 2021  | 189 | 0-13 | 0.00-7.39  | 0-0  | 0.00-0.00  |
|          | May 3 to May 9, 2021   | 179 | 0-7  | 0.00-4.07  | 0-0  | 0.00-0.00  |
|          | May 10 to May 16, 2021 | 179 | 0-10 | 0.00-5.92  | 0-0  | 0.00-0.00  |
|          | May 17 to May 23, 2021 | 159 | 0-0  | 0.00-0.00  | 0-7  | 0.00-4.22  |
|          | May 24 to May 30, 2021 | 175 | 0-11 | 0.00-6.71  | 0-0  | 0.00-0.00  |
| Saga     |                        |     |      |            |      |            |
|          | Apr 5 to Apr 11, 2021  | 36  | 0-3  | 0.00-9.09  | 0-0  | 0.00-0.00  |
|          | Apr 12 to Apr 18, 2021 | 32  | 0-0  | 0.00-0.00  | 0-0  | 0.00-0.00  |
|          | Apr 19 to Apr 25, 2021 | 36  | 0-3  | 0.00-9.09  | 0-0  | 0.00-0.00  |
|          | Apr 26 to May 2, 2021  | 27  | 0-0  | 0.00-0.00  | 0-6  | 0.00-18.18 |
|          | May 3 to May 9, 2021   | 33  | 0-1  | 0.00-3.13  | 0-0  | 0.00-0.00  |
|          | May 10 to May 16, 2021 | 22  | 0-0  | 0.00-0.00  | 0-9  | 0.00-29.03 |
|          | May 17 to May 23, 2021 | 31  | 0-0  | 0.00-0.00  | 0-0  | 0.00-0.00  |
|          | May 24 to May 30, 2021 | 39  | 0-7  | 0.00-21.88 | 0-0  | 0.00-0.00  |
| Nagasaki |                        |     |      |            |      |            |
|          | Apr 5 to Apr 11, 2021  | 63  | 0-0  | 0.00-0.00  | 0-4  | 0.00-5.97  |
|          | Apr 12 to Apr 18, 2021 | 58  | 0-0  | 0.00-0.00  | 0-8  | 0.00-12.12 |
|          | Apr 19 to Apr 25, 2021 | 65  | 0-0  | 0.00-0.00  | 0-0  | 0.00-0.00  |
|          | Apr 26 to May 2, 2021  | 65  | 0-2  | 0.00-3.17  | 0-0  | 0.00-0.00  |
|          | May 3 to May 9, 2021   | 63  | 0-2  | 0.00-3.28  | 0-0  | 0.00-0.00  |
|          | May 10 to May 16, 2021 | 63  | 0-3  | 0.00-5.00  | 0-0  | 0.00-0.00  |
|          | May 17 to May 23, 2021 | 62  | 0-3  | 0.00-5.08  | 0-0  | 0.00-0.00  |
|          | May 24 to May 30, 2021 | 64  | 0-6  | 0.00-10.34 | 0-0  | 0.00-0.00  |
| Kumamoto |                        |     |      |            |      |            |
|          | Apr 5 to Apr 11, 2021  | 70  | 0-0  | 0.00-0.00  | 0-3  | 0.00-4.11  |
|          | Apr 12 to Apr 18, 2021 | 70  | 0-0  | 0.00-0.00  | 0-2  | 0.00-2.78  |
|          | Apr 19 to Apr 25, 2021 | 80  | 0-9  | 0.00-12.68 | 0-0  | 0.00-0.00  |
|          | Apr 26 to May 2, 2021  | 70  | 0-0  | 0.00-0.00  | 0-1  | 0.00-1.41  |
|          | May 3 to May 9, 2021   | 69  | 0-1  | 0.00-1.47  | 0-0  | 0.00-0.00  |
|          | May 10 to May 16, 2021 | 72  | 0-7  | 0.00-10.77 | 0-0  | 0.00-0.00  |
|          | May 17 to May 23, 2021 | 69  | 0-5  | 0.00-7.81  | 0-0  | 0.00-0.00  |
|          | May 24 to May 30, 2021 | 73  | 0-9  | 0.00-14.06 | 0-0  | 0.00-0.00  |
| Oita     |                        |     |      |            |      |            |
|          | Apr 5 to Apr 11, 2021  | 51  | 0-2  | 0.00-4.08  | 0-0  | 0.00-0.00  |
|          | Apr 12 to Apr 18, 2021 | 44  | 0-0  | 0.00-0.00  | 0-4  | 0.00-8.33  |
|          | Apr 19 to Apr 25, 2021 | 67  | 4-18 | 8.16-36.73 | 0-0  | 0.00-0.00  |
|          | Apr 26 to May 2, 2021  | 38  | 0-0  | 0.00-0.00  | 0-10 | 0.00-20.83 |
|          | May 3 to May 9, 2021   | 44  | 0-0  | 0.00-0.00  | 0-2  | 0.00-4.35  |
|          | May 10 to May 16, 2021 | 58  | 0-13 | 0.00-28.89 | 0-0  | 0.00-0.00  |
|          | May 17 to May 23, 2021 | 53  | 0-9  | 0.00-20.45 | 0-0  | 0.00-0.00  |
|          | May 24 to May 30, 2021 | 41  | 0-0  | 0.00-0.00  | 0-2  | 0.00-4.65  |
| Miyazaki |                        |     |      |            |      |            |
|          | Apr 5 to Apr 11, 2021  | 44  | 0-0  | 0.00-0.00  | 0-7  | 0.00-13.73 |
|          | Apr 12 to Apr 18, 2021 | 57  | 0-7  | 0.00-14.00 | 0-0  | 0.00-0.00  |
|          | Apr 19 to Apr 25, 2021 | 55  | 0-6  | 0.00-12.24 | 0-0  | 0.00-0.00  |
|          | Apr 26 to May 2, 2021  | 48  | 0-0  | 0.00-0.00  | 0-1  | 0.00-2.04  |

|           |                        |    |      |            |      |            |
|-----------|------------------------|----|------|------------|------|------------|
|           | May 3 to May 9, 2021   | 56 | 0-7  | 0.00-14.29 | 0-0  | 0.00-0.00  |
|           | May 10 to May 16, 2021 | 53 | 0-5  | 0.00-10.42 | 0-0  | 0.00-0.00  |
|           | May 17 to May 23, 2021 | 54 | 0-7  | 0.00-14.89 | 0-0  | 0.00-0.00  |
|           | May 24 to May 30, 2021 | 44 | 0-0  | 0.00-0.00  | 0-2  | 0.00-4.35  |
| Kagoshima |                        |    |      |            |      |            |
|           | Apr 5 to Apr 11, 2021  | 87 | 0-7  | 0.00-8.75  | 0-0  | 0.00-0.00  |
|           | Apr 12 to Apr 18, 2021 | 72 | 0-0  | 0.00-0.00  | 0-6  | 0.00-7.69  |
|           | Apr 19 to Apr 25, 2021 | 87 | 0-12 | 0.00-16.00 | 0-0  | 0.00-0.00  |
|           | Apr 26 to May 2, 2021  | 76 | 0-2  | 0.00-2.70  | 0-0  | 0.00-0.00  |
|           | May 3 to May 9, 2021   | 78 | 0-5  | 0.00-6.85  | 0-0  | 0.00-0.00  |
|           | May 10 to May 16, 2021 | 74 | 0-2  | 0.00-2.78  | 0-0  | 0.00-0.00  |
|           | May 17 to May 23, 2021 | 63 | 0-0  | 0.00-0.00  | 0-8  | 0.00-11.27 |
|           | May 24 to May 30, 2021 | 78 | 0-8  | 0.00-11.43 | 0-0  | 0.00-0.00  |
| Okinawa   |                        |    |      |            |      |            |
|           | Apr 5 to Apr 11, 2021  | 35 | 0-0  | 0.00-0.00  | 0-7  | 0.00-16.67 |
|           | Apr 12 to Apr 18, 2021 | 49 | 0-7  | 0.00-16.67 | 0-0  | 0.00-0.00  |
|           | Apr 19 to Apr 25, 2021 | 44 | 0-3  | 0.00-7.32  | 0-0  | 0.00-0.00  |
|           | Apr 26 to May 2, 2021  | 39 | 0-0  | 0.00-0.00  | 0-2  | 0.00-4.88  |
|           | May 3 to May 9, 2021   | 38 | 0-0  | 0.00-0.00  | 0-3  | 0.00-7.32  |
|           | May 10 to May 16, 2021 | 30 | 0-0  | 0.00-0.00  | 0-10 | 0.00-25.00 |
|           | May 17 to May 23, 2021 | 34 | 0-0  | 0.00-0.00  | 0-6  | 0.00-15.00 |
|           | May 24 to May 30, 2021 | 40 | 0-2  | 0.00-5.26  | 0-0  | 0.00-0.00  |

---



**Table A.11: Weekly number of observed and excess/exiguous deaths in Japan and 47 prefectures for circulatory disease-related deaths in nursing homes and elderly care facilities from January 2020 through May 2021.**

| Prefecture | Week                   | Observed | Excess deaths | Percent excess | Exiguous deaths | Percent exiguous |
|------------|------------------------|----------|---------------|----------------|-----------------|------------------|
| Japan      |                        |          |               |                |                 |                  |
|            | Apr 5 to Apr 11, 2021  | 821      | 0–22          | 0.00–2.75      | 0–0             | 0.00–0.00        |
|            | Apr 12 to Apr 18, 2021 | 871      | 12–82         | 1.52–10.39     | 0–0             | 0.00–0.00        |
|            | Apr 19 to Apr 25, 2021 | 857      | 0–71          | 0.00–9.03      | 0–0             | 0.00–0.00        |
|            | Apr 26 to May 2, 2021  | 941      | 98–166        | 12.65–21.42    | 0–0             | 0.00–0.00        |
|            | May 3 to May 9, 2021   | 935      | 105–175       | 13.82–23.03    | 0–0             | 0.00–0.00        |
|            | May 10 to May 16, 2021 | 896      | 91–159        | 12.35–21.57    | 0–0             | 0.00–0.00        |
|            | May 17 to May 23, 2021 | 862      | 61–129        | 8.32–17.60     | 0–0             | 0.00–0.00        |
|            | May 24 to May 30, 2021 | 793      | 0–65          | 0.00–8.93      | 0–0             | 0.00–0.00        |
| Hokkaido   |                        |          |               |                |                 |                  |
|            | Apr 5 to Apr 11, 2021  | 18       | 0–0           | 0.00–0.00      | 0–3             | 0.00–14.29       |
|            | Apr 12 to Apr 18, 2021 | 21       | 0–0           | 0.00–0.00      | 0–0             | 0.00–0.00        |
|            | Apr 19 to Apr 25, 2021 | 24       | 0–3           | 0.00–14.29     | 0–0             | 0.00–0.00        |
|            | Apr 26 to May 2, 2021  | 18       | 0–0           | 0.00–0.00      | 0–3             | 0.00–14.29       |
|            | May 3 to May 9, 2021   | 24       | 0–3           | 0.00–14.29     | 0–0             | 0.00–0.00        |
|            | May 10 to May 16, 2021 | 22       | 0–1           | 0.00–4.76      | 0–0             | 0.00–0.00        |
|            | May 17 to May 23, 2021 | 25       | 0–4           | 0.00–19.05     | 0–0             | 0.00–0.00        |
|            | May 24 to May 30, 2021 | 23       | 0–3           | 0.00–15.00     | 0–0             | 0.00–0.00        |
| Aomori     |                        |          |               |                |                 |                  |
|            | Apr 5 to Apr 11, 2021  | 19       | 0–5           | 0.00–35.71     | 0–0             | 0.00–0.00        |
|            | Apr 12 to Apr 18, 2021 | 19       | 0–5           | 0.00–35.71     | 0–0             | 0.00–0.00        |
|            | Apr 19 to Apr 25, 2021 | 15       | 0–1           | 0.00–7.14      | 0–0             | 0.00–0.00        |
|            | Apr 26 to May 2, 2021  | 14       | 0–0           | 0.00–0.00      | 0–0             | 0.00–0.00        |
|            | May 3 to May 9, 2021   | 12       | 0–0           | 0.00–0.00      | 0–1             | 0.00–7.69        |
|            | May 10 to May 16, 2021 | 14       | 0–1           | 0.00–7.69      | 0–0             | 0.00–0.00        |
|            | May 17 to May 23, 2021 | 19       | 0–5           | 0.00–35.71     | 0–0             | 0.00–0.00        |
|            | May 24 to May 30, 2021 | 16       | 0–2           | 0.00–14.29     | 0–0             | 0.00–0.00        |
| Iwate      |                        |          |               |                |                 |                  |
|            | Apr 5 to Apr 11, 2021  | 16       | 0–3           | 0.00–23.08     | 0–0             | 0.00–0.00        |
|            | Apr 12 to Apr 18, 2021 | 14       | 0–1           | 0.00–7.69      | 0–0             | 0.00–0.00        |
|            | Apr 19 to Apr 25, 2021 | 12       | 0–0           | 0.00–0.00      | 0–1             | 0.00–7.69        |
|            | Apr 26 to May 2, 2021  | 17       | 0–4           | 0.00–30.77     | 0–0             | 0.00–0.00        |
|            | May 3 to May 9, 2021   | 19       | 0–6           | 0.00–46.15     | 0–0             | 0.00–0.00        |
|            | May 10 to May 16, 2021 | 10       | 0–0           | 0.00–0.00      | 0–2             | 0.00–16.67       |
|            | May 17 to May 23, 2021 | 18       | 0–6           | 0.00–50.00     | 0–0             | 0.00–0.00        |
|            | May 24 to May 30, 2021 | 14       | 0–2           | 0.00–16.67     | 0–0             | 0.00–0.00        |
| Miyagi     |                        |          |               |                |                 |                  |
|            | Apr 5 to Apr 11, 2021  | 17       | 0–2           | 0.00–13.33     | 0–0             | 0.00–0.00        |
|            | Apr 12 to Apr 18, 2021 | 13       | 0–0           | 0.00–0.00      | 0–1             | 0.00–7.14        |
|            | Apr 19 to Apr 25, 2021 | 13       | 0–0           | 0.00–0.00      | 0–1             | 0.00–7.14        |
|            | Apr 26 to May 2, 2021  | 19       | 0–5           | 0.00–35.71     | 0–0             | 0.00–0.00        |

|           |                        |    |     |             |     |            |
|-----------|------------------------|----|-----|-------------|-----|------------|
|           | May 3 to May 9, 2021   | 16 | 0-2 | 0.00-14.29  | 0-0 | 0.00-0.00  |
|           | May 10 to May 16, 2021 | 14 | 0-0 | 0.00-0.00   | 0-0 | 0.00-0.00  |
|           | May 17 to May 23, 2021 | 17 | 0-3 | 0.00-21.43  | 0-0 | 0.00-0.00  |
|           | May 24 to May 30, 2021 | 19 | 0-5 | 0.00-35.71  | 0-0 | 0.00-0.00  |
| Akita     |                        |    |     |             |     |            |
|           | Apr 5 to Apr 11, 2021  | 19 | 1-8 | 9.09-72.73  | 0-0 | 0.00-0.00  |
|           | Apr 12 to Apr 18, 2021 | 17 | 0-6 | 0.00-54.55  | 0-0 | 0.00-0.00  |
|           | Apr 19 to Apr 25, 2021 | 8  | 0-0 | 0.00-0.00   | 0-3 | 0.00-27.27 |
|           | Apr 26 to May 2, 2021  | 11 | 0-0 | 0.00-0.00   | 0-0 | 0.00-0.00  |
|           | May 3 to May 9, 2021   | 20 | 3-9 | 27.27-81.82 | 0-0 | 0.00-0.00  |
|           | May 10 to May 16, 2021 | 13 | 0-3 | 0.00-30.00  | 0-0 | 0.00-0.00  |
|           | May 17 to May 23, 2021 | 15 | 0-5 | 0.00-50.00  | 0-0 | 0.00-0.00  |
|           | May 24 to May 30, 2021 | 14 | 0-4 | 0.00-40.00  | 0-0 | 0.00-0.00  |
| Yamagata  |                        |    |     |             |     |            |
|           | Apr 5 to Apr 11, 2021  | 10 | 0-0 | 0.00-0.00   | 0-2 | 0.00-16.67 |
|           | Apr 12 to Apr 18, 2021 | 21 | 2-9 | 16.67-75.00 | 0-0 | 0.00-0.00  |
|           | Apr 19 to Apr 25, 2021 | 11 | 0-0 | 0.00-0.00   | 0-0 | 0.00-0.00  |
|           | Apr 26 to May 2, 2021  | 15 | 0-4 | 0.00-36.36  | 0-0 | 0.00-0.00  |
|           | May 3 to May 9, 2021   | 11 | 0-0 | 0.00-0.00   | 0-1 | 0.00-8.33  |
|           | May 10 to May 16, 2021 | 6  | 0-0 | 0.00-0.00   | 0-5 | 0.00-45.45 |
|           | May 17 to May 23, 2021 | 18 | 0-7 | 0.00-63.64  | 0-0 | 0.00-0.00  |
|           | May 24 to May 30, 2021 | 11 | 0-0 | 0.00-0.00   | 0-1 | 0.00-8.33  |
| Fukushima |                        |    |     |             |     |            |
|           | Apr 5 to Apr 11, 2021  | 13 | 0-0 | 0.00-0.00   | 0-3 | 0.00-18.75 |
|           | Apr 12 to Apr 18, 2021 | 14 | 0-0 | 0.00-0.00   | 0-1 | 0.00-6.67  |
|           | Apr 19 to Apr 25, 2021 | 11 | 0-0 | 0.00-0.00   | 0-5 | 0.00-31.25 |
|           | Apr 26 to May 2, 2021  | 19 | 0-3 | 0.00-18.75  | 0-0 | 0.00-0.00  |
|           | May 3 to May 9, 2021   | 20 | 0-4 | 0.00-25.00  | 0-0 | 0.00-0.00  |
|           | May 10 to May 16, 2021 | 16 | 0-0 | 0.00-0.00   | 0-0 | 0.00-0.00  |
|           | May 17 to May 23, 2021 | 15 | 0-0 | 0.00-0.00   | 0-0 | 0.00-0.00  |
|           | May 24 to May 30, 2021 | 13 | 0-0 | 0.00-0.00   | 0-2 | 0.00-13.33 |
| Ibaraki   |                        |    |     |             |     |            |
|           | Apr 5 to Apr 11, 2021  | 14 | 0-0 | 0.00-0.00   | 0-1 | 0.00-6.67  |
|           | Apr 12 to Apr 18, 2021 | 20 | 0-5 | 0.00-33.33  | 0-0 | 0.00-0.00  |
|           | Apr 19 to Apr 25, 2021 | 14 | 0-0 | 0.00-0.00   | 0-0 | 0.00-0.00  |
|           | Apr 26 to May 2, 2021  | 12 | 0-0 | 0.00-0.00   | 0-2 | 0.00-14.29 |
|           | May 3 to May 9, 2021   | 18 | 0-5 | 0.00-38.46  | 0-0 | 0.00-0.00  |
|           | May 10 to May 16, 2021 | 17 | 0-4 | 0.00-30.77  | 0-0 | 0.00-0.00  |
|           | May 17 to May 23, 2021 | 20 | 0-7 | 0.00-53.85  | 0-0 | 0.00-0.00  |
|           | May 24 to May 30, 2021 | 15 | 0-3 | 0.00-25.00  | 0-0 | 0.00-0.00  |
| Tochigi   |                        |    |     |             |     |            |
|           | Apr 5 to Apr 11, 2021  | 10 | 0-0 | 0.00-0.00   | 0-6 | 0.00-37.50 |
|           | Apr 12 to Apr 18, 2021 | 17 | 0-2 | 0.00-13.33  | 0-0 | 0.00-0.00  |
|           | Apr 19 to Apr 25, 2021 | 17 | 0-2 | 0.00-13.33  | 0-0 | 0.00-0.00  |
|           | Apr 26 to May 2, 2021  | 21 | 0-6 | 0.00-40.00  | 0-0 | 0.00-0.00  |
|           | May 3 to May 9, 2021   | 11 | 0-0 | 0.00-0.00   | 0-3 | 0.00-21.43 |

|          |                        |    |      |              |      |            |
|----------|------------------------|----|------|--------------|------|------------|
|          | May 10 to May 16, 2021 | 12 | 0-0  | 0.00-0.00    | 0-2  | 0.00-14.29 |
|          | May 17 to May 23, 2021 | 30 | 9-17 | 69.23-130.77 | 0-0  | 0.00-0.00  |
|          | May 24 to May 30, 2021 | 16 | 0-3  | 0.00-23.08   | 0-0  | 0.00-0.00  |
| Gunma    |                        |    |      |              |      |            |
|          | Apr 5 to Apr 11, 2021  | 19 | 0-0  | 0.00-0.00    | 0-0  | 0.00-0.00  |
|          | Apr 12 to Apr 18, 2021 | 22 | 0-4  | 0.00-22.22   | 0-0  | 0.00-0.00  |
|          | Apr 19 to Apr 25, 2021 | 21 | 0-3  | 0.00-16.67   | 0-0  | 0.00-0.00  |
|          | Apr 26 to May 2, 2021  | 18 | 0-1  | 0.00-5.88    | 0-0  | 0.00-0.00  |
|          | May 3 to May 9, 2021   | 24 | 0-7  | 0.00-41.18   | 0-0  | 0.00-0.00  |
|          | May 10 to May 16, 2021 | 22 | 0-5  | 0.00-29.41   | 0-0  | 0.00-0.00  |
|          | May 17 to May 23, 2021 | 18 | 0-1  | 0.00-5.88    | 0-0  | 0.00-0.00  |
|          | May 24 to May 30, 2021 | 21 | 0-5  | 0.00-31.25   | 0-0  | 0.00-0.00  |
| Saitama  |                        |    |      |              |      |            |
|          | Apr 5 to Apr 11, 2021  | 33 | 0-0  | 0.00-0.00    | 0-3  | 0.00-8.33  |
|          | Apr 12 to Apr 18, 2021 | 34 | 0-0  | 0.00-0.00    | 0-2  | 0.00-5.56  |
|          | Apr 19 to Apr 25, 2021 | 44 | 0-9  | 0.00-25.71   | 0-0  | 0.00-0.00  |
|          | Apr 26 to May 2, 2021  | 39 | 0-4  | 0.00-11.43   | 0-0  | 0.00-0.00  |
|          | May 3 to May 9, 2021   | 46 | 0-12 | 0.00-35.29   | 0-0  | 0.00-0.00  |
|          | May 10 to May 16, 2021 | 32 | 0-0  | 0.00-0.00    | 0-1  | 0.00-3.03  |
|          | May 17 to May 23, 2021 | 34 | 0-1  | 0.00-3.03    | 0-0  | 0.00-0.00  |
|          | May 24 to May 30, 2021 | 33 | 0-1  | 0.00-3.13    | 0-0  | 0.00-0.00  |
| Chiba    |                        |    |      |              |      |            |
|          | Apr 5 to Apr 11, 2021  | 24 | 0-0  | 0.00-0.00    | 0-2  | 0.00-7.69  |
|          | Apr 12 to Apr 18, 2021 | 33 | 0-7  | 0.00-26.92   | 0-0  | 0.00-0.00  |
|          | Apr 19 to Apr 25, 2021 | 40 | 4-14 | 15.38-53.85  | 0-0  | 0.00-0.00  |
|          | Apr 26 to May 2, 2021  | 34 | 0-7  | 0.00-25.93   | 0-0  | 0.00-0.00  |
|          | May 3 to May 9, 2021   | 31 | 0-5  | 0.00-19.23   | 0-0  | 0.00-0.00  |
|          | May 10 to May 16, 2021 | 29 | 0-4  | 0.00-16.00   | 0-0  | 0.00-0.00  |
|          | May 17 to May 23, 2021 | 29 | 0-4  | 0.00-16.00   | 0-0  | 0.00-0.00  |
|          | May 24 to May 30, 2021 | 27 | 0-3  | 0.00-12.50   | 0-0  | 0.00-0.00  |
| Tokyo    |                        |    |      |              |      |            |
|          | Apr 5 to Apr 11, 2021  | 52 | 0-0  | 0.00-0.00    | 0-5  | 0.00-8.77  |
|          | Apr 12 to Apr 18, 2021 | 70 | 0-14 | 0.00-25.00   | 0-0  | 0.00-0.00  |
|          | Apr 19 to Apr 25, 2021 | 53 | 0-0  | 0.00-0.00    | 0-4  | 0.00-7.02  |
|          | Apr 26 to May 2, 2021  | 67 | 0-12 | 0.00-21.82   | 0-0  | 0.00-0.00  |
|          | May 3 to May 9, 2021   | 71 | 1-16 | 1.82-29.09   | 0-0  | 0.00-0.00  |
|          | May 10 to May 16, 2021 | 62 | 0-8  | 0.00-14.81   | 0-0  | 0.00-0.00  |
|          | May 17 to May 23, 2021 | 58 | 0-4  | 0.00-7.41    | 0-0  | 0.00-0.00  |
|          | May 24 to May 30, 2021 | 41 | 0-0  | 0.00-0.00    | 0-11 | 0.00-21.15 |
| Kanagawa |                        |    |      |              |      |            |
|          | Apr 5 to Apr 11, 2021  | 50 | 0-10 | 0.00-25.00   | 0-0  | 0.00-0.00  |
|          | Apr 12 to Apr 18, 2021 | 52 | 0-12 | 0.00-30.00   | 0-0  | 0.00-0.00  |
|          | Apr 19 to Apr 25, 2021 | 46 | 0-6  | 0.00-15.00   | 0-0  | 0.00-0.00  |
|          | Apr 26 to May 2, 2021  | 44 | 0-4  | 0.00-10.00   | 0-0  | 0.00-0.00  |
|          | May 3 to May 9, 2021   | 50 | 0-12 | 0.00-31.58   | 0-0  | 0.00-0.00  |
|          | May 10 to May 16, 2021 | 50 | 1-13 | 2.70-35.14   | 0-0  | 0.00-0.00  |

|           |                        |    |      |             |     |            |
|-----------|------------------------|----|------|-------------|-----|------------|
|           | May 17 to May 23, 2021 | 53 | 3-16 | 8.11-43.24  | 0-0 | 0.00-0.00  |
|           | May 24 to May 30, 2021 | 42 | 0-5  | 0.00-13.51  | 0-0 | 0.00-0.00  |
| Niigata   |                        |    |      |             |     |            |
|           | Apr 5 to Apr 11, 2021  | 29 | 0-6  | 0.00-26.09  | 0-0 | 0.00-0.00  |
|           | Apr 12 to Apr 18, 2021 | 22 | 0-0  | 0.00-0.00   | 0-1 | 0.00-4.35  |
|           | Apr 19 to Apr 25, 2021 | 29 | 0-5  | 0.00-20.83  | 0-0 | 0.00-0.00  |
|           | Apr 26 to May 2, 2021  | 22 | 0-0  | 0.00-0.00   | 0-3 | 0.00-12.00 |
|           | May 3 to May 9, 2021   | 17 | 0-0  | 0.00-0.00   | 0-7 | 0.00-29.17 |
|           | May 10 to May 16, 2021 | 30 | 0-7  | 0.00-30.43  | 0-0 | 0.00-0.00  |
|           | May 17 to May 23, 2021 | 24 | 0-1  | 0.00-4.35   | 0-0 | 0.00-0.00  |
|           | May 24 to May 30, 2021 | 22 | 0-0  | 0.00-0.00   | 0-1 | 0.00-4.35  |
| Toyama    |                        |    |      |             |     |            |
|           | Apr 5 to Apr 11, 2021  | 10 | 0-1  | 0.00-11.11  | 0-0 | 0.00-0.00  |
|           | Apr 12 to Apr 18, 2021 | 13 | 0-4  | 0.00-44.44  | 0-0 | 0.00-0.00  |
|           | Apr 19 to Apr 25, 2021 | 7  | 0-0  | 0.00-0.00   | 0-2 | 0.00-22.22 |
|           | Apr 26 to May 2, 2021  | 13 | 0-4  | 0.00-44.44  | 0-0 | 0.00-0.00  |
|           | May 3 to May 9, 2021   | 12 | 0-3  | 0.00-33.33  | 0-0 | 0.00-0.00  |
|           | May 10 to May 16, 2021 | 7  | 0-0  | 0.00-0.00   | 0-2 | 0.00-22.22 |
|           | May 17 to May 23, 2021 | 7  | 0-0  | 0.00-0.00   | 0-3 | 0.00-30.00 |
|           | May 24 to May 30, 2021 | 10 | 0-1  | 0.00-11.11  | 0-0 | 0.00-0.00  |
| Ishikawa  |                        |    |      |             |     |            |
|           | Apr 5 to Apr 11, 2021  | 13 | 0-3  | 0.00-30.00  | 0-0 | 0.00-0.00  |
|           | Apr 12 to Apr 18, 2021 | 14 | 0-4  | 0.00-40.00  | 0-0 | 0.00-0.00  |
|           | Apr 19 to Apr 25, 2021 | 10 | 0-0  | 0.00-0.00   | 0-0 | 0.00-0.00  |
|           | Apr 26 to May 2, 2021  | 15 | 0-5  | 0.00-50.00  | 0-0 | 0.00-0.00  |
|           | May 3 to May 9, 2021   | 9  | 0-0  | 0.00-0.00   | 0-1 | 0.00-10.00 |
|           | May 10 to May 16, 2021 | 11 | 0-1  | 0.00-10.00  | 0-0 | 0.00-0.00  |
|           | May 17 to May 23, 2021 | 16 | 0-6  | 0.00-60.00  | 0-0 | 0.00-0.00  |
|           | May 24 to May 30, 2021 | 13 | 0-3  | 0.00-30.00  | 0-0 | 0.00-0.00  |
| Fukui     |                        |    |      |             |     |            |
|           | Apr 5 to Apr 11, 2021  | 6  | 0-0  | 0.00-0.00   | 0-2 | 0.00-25.00 |
|           | Apr 12 to Apr 18, 2021 | 3  | 0-0  | 0.00-0.00   | 0-5 | 0.00-62.50 |
|           | Apr 19 to Apr 25, 2021 | 6  | 0-0  | 0.00-0.00   | 0-2 | 0.00-25.00 |
|           | Apr 26 to May 2, 2021  | 10 | 0-2  | 0.00-25.00  | 0-0 | 0.00-0.00  |
|           | May 3 to May 9, 2021   | 13 | 0-5  | 0.00-62.50  | 0-0 | 0.00-0.00  |
|           | May 10 to May 16, 2021 | 13 | 0-5  | 0.00-62.50  | 0-0 | 0.00-0.00  |
|           | May 17 to May 23, 2021 | 12 | 0-4  | 0.00-50.00  | 0-0 | 0.00-0.00  |
|           | May 24 to May 30, 2021 | 8  | 0-1  | 0.00-14.29  | 0-0 | 0.00-0.00  |
| Yamanashi |                        |    |      |             |     |            |
|           | Apr 5 to Apr 11, 2021  | 8  | 0-2  | 0.00-33.33  | 0-0 | 0.00-0.00  |
|           | Apr 12 to Apr 18, 2021 | 10 | 0-4  | 0.00-66.67  | 0-0 | 0.00-0.00  |
|           | Apr 19 to Apr 25, 2021 | 4  | 0-0  | 0.00-0.00   | 0-2 | 0.00-33.33 |
|           | Apr 26 to May 2, 2021  | 9  | 0-2  | 0.00-28.57  | 0-0 | 0.00-0.00  |
|           | May 3 to May 9, 2021   | 11 | 0-4  | 0.00-57.14  | 0-0 | 0.00-0.00  |
|           | May 10 to May 16, 2021 | 12 | 0-6  | 0.00-100.00 | 0-0 | 0.00-0.00  |
|           | May 17 to May 23, 2021 | 3  | 0-0  | 0.00-0.00   | 0-4 | 0.00-57.14 |

|                        |                        |     |           |            |           |            |
|------------------------|------------------------|-----|-----------|------------|-----------|------------|
| Nagano                 | May 24 to May 30, 2021 | 9   | 0-2       | 0.00-28.57 | 0-0       | 0.00-0.00  |
|                        | Apr 5 to Apr 11, 2021  | 23  | 0-0       | 0.00-0.00  | 0-1       | 0.00-4.17  |
|                        | Apr 12 to Apr 18, 2021 | 25  | 0-1       | 0.00-4.17  | 0-0       | 0.00-0.00  |
|                        | Apr 19 to Apr 25, 2021 | 25  | 0-0       | 0.00-0.00  | 0-0       | 0.00-0.00  |
|                        | Apr 26 to May 2, 2021  | 23  | 0-0       | 0.00-0.00  | 0-2       | 0.00-8.00  |
|                        | May 3 to May 9, 2021   | 20  | 0-0       | 0.00-0.00  | 0-4       | 0.00-16.67 |
|                        | May 10 to May 16, 2021 | 31  | 0-7       | 0.00-29.17 | 0-0       | 0.00-0.00  |
|                        | May 17 to May 23, 2021 | 22  | 0-0       | 0.00-0.00  | 0-2       | 0.00-8.33  |
| May 24 to May 30, 2021 | 22                     | 0-0 | 0.00-0.00 | 0-1        | 0.00-4.35 |            |
| Gifu                   | Apr 5 to Apr 11, 2021  | 22  | 0-6       | 0.00-37.50 | 0-0       | 0.00-0.00  |
|                        | Apr 12 to Apr 18, 2021 | 20  | 0-4       | 0.00-25.00 | 0-0       | 0.00-0.00  |
|                        | Apr 19 to Apr 25, 2021 | 21  | 0-5       | 0.00-31.25 | 0-0       | 0.00-0.00  |
|                        | Apr 26 to May 2, 2021  | 19  | 0-4       | 0.00-26.67 | 0-0       | 0.00-0.00  |
|                        | May 3 to May 9, 2021   | 21  | 0-6       | 0.00-40.00 | 0-0       | 0.00-0.00  |
|                        | May 10 to May 16, 2021 | 19  | 0-4       | 0.00-26.67 | 0-0       | 0.00-0.00  |
|                        | May 17 to May 23, 2021 | 17  | 0-3       | 0.00-21.43 | 0-0       | 0.00-0.00  |
|                        | May 24 to May 30, 2021 | 16  | 0-2       | 0.00-14.29 | 0-0       | 0.00-0.00  |
| Shizuoka               | Apr 5 to Apr 11, 2021  | 30  | 0-0       | 0.00-0.00  | 0-6       | 0.00-16.67 |
|                        | Apr 12 to Apr 18, 2021 | 47  | 0-13      | 0.00-38.24 | 0-0       | 0.00-0.00  |
|                        | Apr 19 to Apr 25, 2021 | 41  | 0-7       | 0.00-20.59 | 0-0       | 0.00-0.00  |
|                        | Apr 26 to May 2, 2021  | 39  | 0-6       | 0.00-18.18 | 0-0       | 0.00-0.00  |
|                        | May 3 to May 9, 2021   | 45  | 2-14      | 6.45-45.16 | 0-0       | 0.00-0.00  |
|                        | May 10 to May 16, 2021 | 40  | 0-8       | 0.00-25.00 | 0-0       | 0.00-0.00  |
|                        | May 17 to May 23, 2021 | 43  | 1-13      | 3.33-43.33 | 0-0       | 0.00-0.00  |
|                        | May 24 to May 30, 2021 | 25  | 0-0       | 0.00-0.00  | 0-4       | 0.00-13.79 |
| Aichi                  | Apr 5 to Apr 11, 2021  | 36  | 0-0       | 0.00-0.00  | 0-4       | 0.00-10.00 |
|                        | Apr 12 to Apr 18, 2021 | 29  | 0-0       | 0.00-0.00  | 0-11      | 0.00-27.50 |
|                        | Apr 19 to Apr 25, 2021 | 38  | 0-0       | 0.00-0.00  | 0-1       | 0.00-2.56  |
|                        | Apr 26 to May 2, 2021  | 38  | 0-0       | 0.00-0.00  | 0-1       | 0.00-2.56  |
|                        | May 3 to May 9, 2021   | 38  | 0-0       | 0.00-0.00  | 0-0       | 0.00-0.00  |
|                        | May 10 to May 16, 2021 | 41  | 0-4       | 0.00-10.81 | 0-0       | 0.00-0.00  |
|                        | May 17 to May 23, 2021 | 34  | 0-0       | 0.00-0.00  | 0-2       | 0.00-5.56  |
|                        | May 24 to May 30, 2021 | 38  | 0-1       | 0.00-2.70  | 0-0       | 0.00-0.00  |
| Mie                    | Apr 5 to Apr 11, 2021  | 13  | 0-0       | 0.00-0.00  | 0-5       | 0.00-27.78 |
|                        | Apr 12 to Apr 18, 2021 | 22  | 0-4       | 0.00-22.22 | 0-0       | 0.00-0.00  |
|                        | Apr 19 to Apr 25, 2021 | 16  | 0-0       | 0.00-0.00  | 0-2       | 0.00-11.11 |
|                        | Apr 26 to May 2, 2021  | 24  | 0-7       | 0.00-41.18 | 0-0       | 0.00-0.00  |
|                        | May 3 to May 9, 2021   | 8   | 0-0       | 0.00-0.00  | 1-8       | 6.25-50.00 |
|                        | May 10 to May 16, 2021 | 18  | 0-2       | 0.00-12.50 | 0-0       | 0.00-0.00  |
|                        | May 17 to May 23, 2021 | 17  | 0-1       | 0.00-6.25  | 0-0       | 0.00-0.00  |
|                        | May 24 to May 30, 2021 | 11  | 0-0       | 0.00-0.00  | 0-6       | 0.00-35.29 |

Shiga

|                        |    |     |              |     |            |
|------------------------|----|-----|--------------|-----|------------|
| Apr 5 to Apr 11, 2021  | 9  | 0-3 | 0.00-50.00   | 0-0 | 0.00-0.00  |
| Apr 12 to Apr 18, 2021 | 13 | 2-7 | 33.33-116.67 | 0-0 | 0.00-0.00  |
| Apr 19 to Apr 25, 2021 | 7  | 0-1 | 0.00-16.67   | 0-0 | 0.00-0.00  |
| Apr 26 to May 2, 2021  | 7  | 0-1 | 0.00-16.67   | 0-0 | 0.00-0.00  |
| May 3 to May 9, 2021   | 6  | 0-0 | 0.00-0.00    | 0-0 | 0.00-0.00  |
| May 10 to May 16, 2021 | 11 | 0-5 | 0.00-83.33   | 0-0 | 0.00-0.00  |
| May 17 to May 23, 2021 | 11 | 0-4 | 0.00-57.14   | 0-0 | 0.00-0.00  |
| May 24 to May 30, 2021 | 6  | 0-0 | 0.00-0.00    | 0-1 | 0.00-14.29 |

Kyoto

|                        |    |     |            |     |            |
|------------------------|----|-----|------------|-----|------------|
| Apr 5 to Apr 11, 2021  | 17 | 0-1 | 0.00-6.25  | 0-0 | 0.00-0.00  |
| Apr 12 to Apr 18, 2021 | 14 | 0-0 | 0.00-0.00  | 0-2 | 0.00-12.50 |
| Apr 19 to Apr 25, 2021 | 23 | 0-7 | 0.00-43.75 | 0-0 | 0.00-0.00  |
| Apr 26 to May 2, 2021  | 17 | 0-1 | 0.00-6.25  | 0-0 | 0.00-0.00  |
| May 3 to May 9, 2021   | 16 | 0-0 | 0.00-0.00  | 0-0 | 0.00-0.00  |
| May 10 to May 16, 2021 | 19 | 0-4 | 0.00-26.67 | 0-0 | 0.00-0.00  |
| May 17 to May 23, 2021 | 12 | 0-0 | 0.00-0.00  | 0-2 | 0.00-14.29 |
| May 24 to May 30, 2021 | 17 | 0-3 | 0.00-21.43 | 0-0 | 0.00-0.00  |

Osaka

|                        |    |      |            |     |           |
|------------------------|----|------|------------|-----|-----------|
| Apr 5 to Apr 11, 2021  | 55 | 0-14 | 0.00-34.15 | 0-0 | 0.00-0.00 |
| Apr 12 to Apr 18, 2021 | 47 | 0-7  | 0.00-17.50 | 0-0 | 0.00-0.00 |
| Apr 19 to Apr 25, 2021 | 37 | 0-0  | 0.00-0.00  | 0-3 | 0.00-7.50 |
| Apr 26 to May 2, 2021  | 53 | 0-12 | 0.00-29.27 | 0-0 | 0.00-0.00 |
| May 3 to May 9, 2021   | 46 | 0-6  | 0.00-15.00 | 0-0 | 0.00-0.00 |
| May 10 to May 16, 2021 | 39 | 0-0  | 0.00-0.00  | 0-1 | 0.00-2.50 |
| May 17 to May 23, 2021 | 37 | 0-0  | 0.00-0.00  | 0-1 | 0.00-2.63 |
| May 24 to May 30, 2021 | 40 | 0-3  | 0.00-8.11  | 0-0 | 0.00-0.00 |

Hyogo

|                        |    |     |            |     |            |
|------------------------|----|-----|------------|-----|------------|
| Apr 5 to Apr 11, 2021  | 36 | 0-1 | 0.00-2.86  | 0-0 | 0.00-0.00  |
| Apr 12 to Apr 18, 2021 | 28 | 0-0 | 0.00-0.00  | 0-6 | 0.00-17.65 |
| Apr 19 to Apr 25, 2021 | 30 | 0-0 | 0.00-0.00  | 0-4 | 0.00-11.76 |
| Apr 26 to May 2, 2021  | 38 | 0-4 | 0.00-11.76 | 0-0 | 0.00-0.00  |
| May 3 to May 9, 2021   | 34 | 0-1 | 0.00-3.03  | 0-0 | 0.00-0.00  |
| May 10 to May 16, 2021 | 37 | 0-4 | 0.00-12.12 | 0-0 | 0.00-0.00  |
| May 17 to May 23, 2021 | 32 | 0-0 | 0.00-0.00  | 0-1 | 0.00-3.03  |
| May 24 to May 30, 2021 | 35 | 0-4 | 0.00-12.90 | 0-0 | 0.00-0.00  |

Nara

|                        |    |     |            |     |            |
|------------------------|----|-----|------------|-----|------------|
| Apr 5 to Apr 11, 2021  | 8  | 0-0 | 0.00-0.00  | 0-2 | 0.00-20.00 |
| Apr 12 to Apr 18, 2021 | 8  | 0-0 | 0.00-0.00  | 0-2 | 0.00-20.00 |
| Apr 19 to Apr 25, 2021 | 12 | 0-1 | 0.00-9.09  | 0-0 | 0.00-0.00  |
| Apr 26 to May 2, 2021  | 16 | 0-5 | 0.00-45.45 | 0-0 | 0.00-0.00  |
| May 3 to May 9, 2021   | 8  | 0-0 | 0.00-0.00  | 0-3 | 0.00-27.27 |
| May 10 to May 16, 2021 | 16 | 0-4 | 0.00-33.33 | 0-0 | 0.00-0.00  |
| May 17 to May 23, 2021 | 12 | 0-1 | 0.00-9.09  | 0-0 | 0.00-0.00  |
| May 24 to May 30, 2021 | 9  | 0-0 | 0.00-0.00  | 0-2 | 0.00-18.18 |

Wakayama

|           |                        |    |      |            |     |            |
|-----------|------------------------|----|------|------------|-----|------------|
|           | Apr 5 to Apr 11, 2021  | 7  | 0-0  | 0.00-0.00  | 0-3 | 0.00-30.00 |
|           | Apr 12 to Apr 18, 2021 | 5  | 0-0  | 0.00-0.00  | 0-5 | 0.00-50.00 |
|           | Apr 19 to Apr 25, 2021 | 8  | 0-0  | 0.00-0.00  | 0-2 | 0.00-20.00 |
|           | Apr 26 to May 2, 2021  | 14 | 0-5  | 0.00-55.56 | 0-0 | 0.00-0.00  |
|           | May 3 to May 9, 2021   | 15 | 0-6  | 0.00-66.67 | 0-0 | 0.00-0.00  |
|           | May 10 to May 16, 2021 | 9  | 0-1  | 0.00-12.50 | 0-0 | 0.00-0.00  |
|           | May 17 to May 23, 2021 | 5  | 0-0  | 0.00-0.00  | 0-3 | 0.00-37.50 |
|           | May 24 to May 30, 2021 | 9  | 0-2  | 0.00-28.57 | 0-0 | 0.00-0.00  |
| Tottori   |                        |    |      |            |     |            |
|           | Apr 5 to Apr 11, 2021  | 13 | 0-5  | 0.00-62.50 | 0-0 | 0.00-0.00  |
|           | Apr 12 to Apr 18, 2021 | 10 | 0-3  | 0.00-42.86 | 0-0 | 0.00-0.00  |
|           | Apr 19 to Apr 25, 2021 | 13 | 0-6  | 0.00-85.71 | 0-0 | 0.00-0.00  |
|           | Apr 26 to May 2, 2021  | 7  | 0-0  | 0.00-0.00  | 0-0 | 0.00-0.00  |
|           | May 3 to May 9, 2021   | 9  | 0-2  | 0.00-28.57 | 0-0 | 0.00-0.00  |
|           | May 10 to May 16, 2021 | 11 | 0-5  | 0.00-83.33 | 0-0 | 0.00-0.00  |
|           | May 17 to May 23, 2021 | 4  | 0-0  | 0.00-0.00  | 0-2 | 0.00-33.33 |
|           | May 24 to May 30, 2021 | 8  | 0-2  | 0.00-33.33 | 0-0 | 0.00-0.00  |
| Shimane   |                        |    |      |            |     |            |
|           | Apr 5 to Apr 11, 2021  | 6  | 0-0  | 0.00-0.00  | 0-4 | 0.00-40.00 |
|           | Apr 12 to Apr 18, 2021 | 7  | 0-0  | 0.00-0.00  | 0-3 | 0.00-30.00 |
|           | Apr 19 to Apr 25, 2021 | 8  | 0-0  | 0.00-0.00  | 0-2 | 0.00-20.00 |
|           | Apr 26 to May 2, 2021  | 11 | 0-2  | 0.00-22.22 | 0-0 | 0.00-0.00  |
|           | May 3 to May 9, 2021   | 12 | 0-3  | 0.00-33.33 | 0-0 | 0.00-0.00  |
|           | May 10 to May 16, 2021 | 13 | 0-4  | 0.00-44.44 | 0-0 | 0.00-0.00  |
|           | May 17 to May 23, 2021 | 13 | 0-4  | 0.00-44.44 | 0-0 | 0.00-0.00  |
|           | May 24 to May 30, 2021 | 9  | 0-0  | 0.00-0.00  | 0-0 | 0.00-0.00  |
| Okayama   |                        |    |      |            |     |            |
|           | Apr 5 to Apr 11, 2021  | 10 | 0-0  | 0.00-0.00  | 0-3 | 0.00-23.08 |
|           | Apr 12 to Apr 18, 2021 | 8  | 0-0  | 0.00-0.00  | 0-5 | 0.00-38.46 |
|           | Apr 19 to Apr 25, 2021 | 17 | 0-4  | 0.00-30.77 | 0-0 | 0.00-0.00  |
|           | Apr 26 to May 2, 2021  | 16 | 0-3  | 0.00-23.08 | 0-0 | 0.00-0.00  |
|           | May 3 to May 9, 2021   | 13 | 0-1  | 0.00-8.33  | 0-0 | 0.00-0.00  |
|           | May 10 to May 16, 2021 | 11 | 0-0  | 0.00-0.00  | 0-2 | 0.00-15.38 |
|           | May 17 to May 23, 2021 | 20 | 0-7  | 0.00-53.85 | 0-0 | 0.00-0.00  |
|           | May 24 to May 30, 2021 | 11 | 0-0  | 0.00-0.00  | 0-2 | 0.00-15.38 |
| Hiroshima |                        |    |      |            |     |            |
|           | Apr 5 to Apr 11, 2021  | 20 | 0-1  | 0.00-5.26  | 0-0 | 0.00-0.00  |
|           | Apr 12 to Apr 18, 2021 | 19 | 0-0  | 0.00-0.00  | 0-0 | 0.00-0.00  |
|           | Apr 19 to Apr 25, 2021 | 19 | 0-0  | 0.00-0.00  | 0-0 | 0.00-0.00  |
|           | Apr 26 to May 2, 2021  | 12 | 0-0  | 0.00-0.00  | 0-7 | 0.00-36.84 |
|           | May 3 to May 9, 2021   | 28 | 1-10 | 5.56-55.56 | 0-0 | 0.00-0.00  |
|           | May 10 to May 16, 2021 | 23 | 0-5  | 0.00-27.78 | 0-0 | 0.00-0.00  |
|           | May 17 to May 23, 2021 | 22 | 0-4  | 0.00-22.22 | 0-0 | 0.00-0.00  |
|           | May 24 to May 30, 2021 | 21 | 0-3  | 0.00-16.67 | 0-0 | 0.00-0.00  |
| Yamaguchi |                        |    |      |            |     |            |
|           | Apr 5 to Apr 11, 2021  | 13 | 0-0  | 0.00-0.00  | 0-0 | 0.00-0.00  |

|           |                        |    |     |              |     |            |
|-----------|------------------------|----|-----|--------------|-----|------------|
|           | Apr 12 to Apr 18, 2021 | 14 | 0-2 | 0.00-16.67   | 0-0 | 0.00-0.00  |
|           | Apr 19 to Apr 25, 2021 | 13 | 0-1 | 0.00-8.33    | 0-0 | 0.00-0.00  |
|           | Apr 26 to May 2, 2021  | 17 | 0-5 | 0.00-41.67   | 0-0 | 0.00-0.00  |
|           | May 3 to May 9, 2021   | 10 | 0-0 | 0.00-0.00    | 0-3 | 0.00-23.08 |
|           | May 10 to May 16, 2021 | 12 | 0-0 | 0.00-0.00    | 0-0 | 0.00-0.00  |
|           | May 17 to May 23, 2021 | 9  | 0-0 | 0.00-0.00    | 0-3 | 0.00-25.00 |
|           | May 24 to May 30, 2021 | 9  | 0-0 | 0.00-0.00    | 0-2 | 0.00-18.18 |
| Tokushima |                        |    |     |              |     |            |
|           | Apr 5 to Apr 11, 2021  | 6  | 0-0 | 0.00-0.00    | 0-1 | 0.00-14.29 |
|           | Apr 12 to Apr 18, 2021 | 5  | 0-0 | 0.00-0.00    | 0-2 | 0.00-28.57 |
|           | Apr 19 to Apr 25, 2021 | 8  | 0-1 | 0.00-14.29   | 0-0 | 0.00-0.00  |
|           | Apr 26 to May 2, 2021  | 10 | 0-3 | 0.00-42.86   | 0-0 | 0.00-0.00  |
|           | May 3 to May 9, 2021   | 12 | 0-6 | 0.00-100.00  | 0-0 | 0.00-0.00  |
|           | May 10 to May 16, 2021 | 9  | 0-4 | 0.00-80.00   | 0-0 | 0.00-0.00  |
|           | May 17 to May 23, 2021 | 12 | 2-7 | 40.00-140.00 | 0-0 | 0.00-0.00  |
|           | May 24 to May 30, 2021 | 5  | 0-0 | 0.00-0.00    | 0-0 | 0.00-0.00  |
| Kagawa    |                        |    |     |              |     |            |
|           | Apr 5 to Apr 11, 2021  | 8  | 0-0 | 0.00-0.00    | 0-2 | 0.00-20.00 |
|           | Apr 12 to Apr 18, 2021 | 8  | 0-0 | 0.00-0.00    | 0-2 | 0.00-20.00 |
|           | Apr 19 to Apr 25, 2021 | 11 | 0-1 | 0.00-10.00   | 0-0 | 0.00-0.00  |
|           | Apr 26 to May 2, 2021  | 14 | 0-4 | 0.00-40.00   | 0-0 | 0.00-0.00  |
|           | May 3 to May 9, 2021   | 16 | 0-6 | 0.00-60.00   | 0-0 | 0.00-0.00  |
|           | May 10 to May 16, 2021 | 10 | 0-1 | 0.00-11.11   | 0-0 | 0.00-0.00  |
|           | May 17 to May 23, 2021 | 7  | 0-0 | 0.00-0.00    | 0-2 | 0.00-22.22 |
|           | May 24 to May 30, 2021 | 7  | 0-0 | 0.00-0.00    | 0-2 | 0.00-22.22 |
| Ehime     |                        |    |     |              |     |            |
|           | Apr 5 to Apr 11, 2021  | 8  | 0-0 | 0.00-0.00    | 0-5 | 0.00-38.46 |
|           | Apr 12 to Apr 18, 2021 | 13 | 0-0 | 0.00-0.00    | 0-0 | 0.00-0.00  |
|           | Apr 19 to Apr 25, 2021 | 13 | 0-0 | 0.00-0.00    | 0-0 | 0.00-0.00  |
|           | Apr 26 to May 2, 2021  | 15 | 0-3 | 0.00-25.00   | 0-0 | 0.00-0.00  |
|           | May 3 to May 9, 2021   | 17 | 0-5 | 0.00-41.67   | 0-0 | 0.00-0.00  |
|           | May 10 to May 16, 2021 | 13 | 0-1 | 0.00-8.33    | 0-0 | 0.00-0.00  |
|           | May 17 to May 23, 2021 | 13 | 0-1 | 0.00-8.33    | 0-0 | 0.00-0.00  |
|           | May 24 to May 30, 2021 | 13 | 0-1 | 0.00-8.33    | 0-0 | 0.00-0.00  |
| Kochi     |                        |    |     |              |     |            |
|           | Apr 5 to Apr 11, 2021  | 7  | 0-2 | 0.00-40.00   | 0-0 | 0.00-0.00  |
|           | Apr 12 to Apr 18, 2021 | 4  | 0-0 | 0.00-0.00    | 0-1 | 0.00-20.00 |
|           | Apr 19 to Apr 25, 2021 | 3  | 0-0 | 0.00-0.00    | 0-2 | 0.00-40.00 |
|           | Apr 26 to May 2, 2021  | 11 | 1-6 | 20.00-120.00 | 0-0 | 0.00-0.00  |
|           | May 3 to May 9, 2021   | 9  | 0-4 | 0.00-80.00   | 0-0 | 0.00-0.00  |
|           | May 10 to May 16, 2021 | 7  | 0-2 | 0.00-40.00   | 0-0 | 0.00-0.00  |
|           | May 17 to May 23, 2021 | 3  | 0-0 | 0.00-0.00    | 0-2 | 0.00-40.00 |
|           | May 24 to May 30, 2021 | 6  | 0-2 | 0.00-50.00   | 0-0 | 0.00-0.00  |
| Fukuoka   |                        |    |     |              |     |            |
|           | Apr 5 to Apr 11, 2021  | 24 | 0-0 | 0.00-0.00    | 0-3 | 0.00-11.11 |
|           | Apr 12 to Apr 18, 2021 | 19 | 0-0 | 0.00-0.00    | 0-9 | 0.00-32.14 |



|          |                        |    |      |             |     |            |
|----------|------------------------|----|------|-------------|-----|------------|
|          | Apr 19 to Apr 25, 2021 | 21 | 0-0  | 0.00-0.00   | 0-7 | 0.00-25.00 |
|          | Apr 26 to May 2, 2021  | 32 | 0-5  | 0.00-18.52  | 0-0 | 0.00-0.00  |
|          | May 3 to May 9, 2021   | 35 | 0-9  | 0.00-34.62  | 0-0 | 0.00-0.00  |
|          | May 10 to May 16, 2021 | 29 | 0-4  | 0.00-16.00  | 0-0 | 0.00-0.00  |
|          | May 17 to May 23, 2021 | 21 | 0-0  | 0.00-0.00   | 0-4 | 0.00-16.00 |
|          | May 24 to May 30, 2021 | 24 | 0-0  | 0.00-0.00   | 0-0 | 0.00-0.00  |
| Saga     |                        |    |      |             |     |            |
|          | Apr 5 to Apr 11, 2021  | 5  | 0-0  | 0.00-0.00   | 0-2 | 0.00-28.57 |
|          | Apr 12 to Apr 18, 2021 | 5  | 0-0  | 0.00-0.00   | 0-2 | 0.00-28.57 |
|          | Apr 19 to Apr 25, 2021 | 9  | 0-3  | 0.00-50.00  | 0-0 | 0.00-0.00  |
|          | Apr 26 to May 2, 2021  | 2  | 0-0  | 0.00-0.00   | 0-4 | 0.00-66.67 |
|          | May 3 to May 9, 2021   | 5  | 0-0  | 0.00-0.00   | 0-1 | 0.00-16.67 |
|          | May 10 to May 16, 2021 | 6  | 0-0  | 0.00-0.00   | 0-0 | 0.00-0.00  |
|          | May 17 to May 23, 2021 | 3  | 0-0  | 0.00-0.00   | 0-3 | 0.00-50.00 |
|          | May 24 to May 30, 2021 | 4  | 0-0  | 0.00-0.00   | 0-1 | 0.00-20.00 |
| Nagasaki |                        |    |      |             |     |            |
|          | Apr 5 to Apr 11, 2021  | 12 | 0-2  | 0.00-20.00  | 0-0 | 0.00-0.00  |
|          | Apr 12 to Apr 18, 2021 | 6  | 0-0  | 0.00-0.00   | 0-4 | 0.00-40.00 |
|          | Apr 19 to Apr 25, 2021 | 12 | 0-2  | 0.00-20.00  | 0-0 | 0.00-0.00  |
|          | Apr 26 to May 2, 2021  | 15 | 0-5  | 0.00-50.00  | 0-0 | 0.00-0.00  |
|          | May 3 to May 9, 2021   | 17 | 0-7  | 0.00-70.00  | 0-0 | 0.00-0.00  |
|          | May 10 to May 16, 2021 | 16 | 0-6  | 0.00-60.00  | 0-0 | 0.00-0.00  |
|          | May 17 to May 23, 2021 | 4  | 0-0  | 0.00-0.00   | 0-6 | 0.00-60.00 |
|          | May 24 to May 30, 2021 | 14 | 0-4  | 0.00-40.00  | 0-0 | 0.00-0.00  |
| Kumamoto |                        |    |      |             |     |            |
|          | Apr 5 to Apr 11, 2021  | 12 | 0-0  | 0.00-0.00   | 0-0 | 0.00-0.00  |
|          | Apr 12 to Apr 18, 2021 | 15 | 0-3  | 0.00-25.00  | 0-0 | 0.00-0.00  |
|          | Apr 19 to Apr 25, 2021 | 11 | 0-0  | 0.00-0.00   | 0-1 | 0.00-8.33  |
|          | Apr 26 to May 2, 2021  | 24 | 4-11 | 30.77-84.62 | 0-0 | 0.00-0.00  |
|          | May 3 to May 9, 2021   | 16 | 0-4  | 0.00-33.33  | 0-0 | 0.00-0.00  |
|          | May 10 to May 16, 2021 | 14 | 0-2  | 0.00-16.67  | 0-0 | 0.00-0.00  |
|          | May 17 to May 23, 2021 | 13 | 0-2  | 0.00-18.18  | 0-0 | 0.00-0.00  |
|          | May 24 to May 30, 2021 | 21 | 4-10 | 36.36-90.91 | 0-0 | 0.00-0.00  |
| Oita     |                        |    |      |             |     |            |
|          | Apr 5 to Apr 11, 2021  | 9  | 0-0  | 0.00-0.00   | 0-6 | 0.00-40.00 |
|          | Apr 12 to Apr 18, 2021 | 22 | 0-8  | 0.00-57.14  | 0-0 | 0.00-0.00  |
|          | Apr 19 to Apr 25, 2021 | 21 | 0-7  | 0.00-50.00  | 0-0 | 0.00-0.00  |
|          | Apr 26 to May 2, 2021  | 15 | 0-2  | 0.00-15.38  | 0-0 | 0.00-0.00  |
|          | May 3 to May 9, 2021   | 14 | 0-0  | 0.00-0.00   | 0-0 | 0.00-0.00  |
|          | May 10 to May 16, 2021 | 16 | 0-2  | 0.00-14.29  | 0-0 | 0.00-0.00  |
|          | May 17 to May 23, 2021 | 12 | 0-0  | 0.00-0.00   | 0-2 | 0.00-14.29 |
|          | May 24 to May 30, 2021 | 14 | 0-1  | 0.00-7.69   | 0-0 | 0.00-0.00  |
| Miyazaki |                        |    |      |             |     |            |
|          | Apr 5 to Apr 11, 2021  | 7  | 0-0  | 0.00-0.00   | 0-3 | 0.00-30.00 |
|          | Apr 12 to Apr 18, 2021 | 10 | 0-0  | 0.00-0.00   | 0-1 | 0.00-9.09  |
|          | Apr 19 to Apr 25, 2021 | 8  | 0-0  | 0.00-0.00   | 0-3 | 0.00-27.27 |

|           |                        |    |     |            |     |            |
|-----------|------------------------|----|-----|------------|-----|------------|
|           | Apr 26 to May 2, 2021  | 10 | 0-0 | 0.00-0.00  | 0-0 | 0.00-0.00  |
|           | May 3 to May 9, 2021   | 11 | 0-0 | 0.00-0.00  | 0-0 | 0.00-0.00  |
|           | May 10 to May 16, 2021 | 13 | 0-3 | 0.00-30.00 | 0-0 | 0.00-0.00  |
|           | May 17 to May 23, 2021 | 15 | 0-5 | 0.00-50.00 | 0-0 | 0.00-0.00  |
|           | May 24 to May 30, 2021 | 12 | 0-2 | 0.00-20.00 | 0-0 | 0.00-0.00  |
| Kagoshima |                        |    |     |            |     |            |
|           | Apr 5 to Apr 11, 2021  | 16 | 0-1 | 0.00-6.67  | 0-0 | 0.00-0.00  |
|           | Apr 12 to Apr 18, 2021 | 14 | 0-0 | 0.00-0.00  | 0-1 | 0.00-6.67  |
|           | Apr 19 to Apr 25, 2021 | 19 | 0-5 | 0.00-35.71 | 0-0 | 0.00-0.00  |
|           | Apr 26 to May 2, 2021  | 17 | 0-4 | 0.00-30.77 | 0-0 | 0.00-0.00  |
|           | May 3 to May 9, 2021   | 12 | 0-0 | 0.00-0.00  | 0-1 | 0.00-7.69  |
|           | May 10 to May 16, 2021 | 10 | 0-0 | 0.00-0.00  | 0-2 | 0.00-16.67 |
|           | May 17 to May 23, 2021 | 12 | 0-0 | 0.00-0.00  | 0-1 | 0.00-7.69  |
|           | May 24 to May 30, 2021 | 13 | 0-1 | 0.00-8.33  | 0-0 | 0.00-0.00  |
| Okinawa   |                        |    |     |            |     |            |
|           | Apr 5 to Apr 11, 2021  | 9  | 0-1 | 0.00-12.50 | 0-0 | 0.00-0.00  |
|           | Apr 12 to Apr 18, 2021 | 5  | 0-0 | 0.00-0.00  | 0-3 | 0.00-37.50 |
|           | Apr 19 to Apr 25, 2021 | 8  | 0-0 | 0.00-0.00  | 0-0 | 0.00-0.00  |
|           | Apr 26 to May 2, 2021  | 8  | 0-0 | 0.00-0.00  | 0-0 | 0.00-0.00  |
|           | May 3 to May 9, 2021   | 7  | 0-0 | 0.00-0.00  | 0-1 | 0.00-12.50 |
|           | May 10 to May 16, 2021 | 11 | 0-3 | 0.00-37.50 | 0-0 | 0.00-0.00  |
|           | May 17 to May 23, 2021 | 6  | 0-0 | 0.00-0.00  | 0-2 | 0.00-25.00 |
|           | May 24 to May 30, 2021 | 7  | 0-0 | 0.00-0.00  | 0-2 | 0.00-22.22 |

---

**Table A.12: Weekly number of observed and excess/exiguous deaths in Japan and 47 prefectures for circulatory disease-related deaths at homes from January 2020 through May 2021.**

| Prefecture | Week                   | Observed | Excess deaths | Percent excess | Exiguous deaths | Percent exiguous |
|------------|------------------------|----------|---------------|----------------|-----------------|------------------|
| Japan      |                        |          |               |                |                 |                  |
|            | Apr 5 to Apr 11, 2021  | 1242     | 0–47          | 0.00–3.93      | 0–0             | 0.00–0.00        |
|            | Apr 12 to Apr 18, 2021 | 1304     | 0–142         | 0.00–12.22     | 0–0             | 0.00–0.00        |
|            | Apr 19 to Apr 25, 2021 | 1193     | 0–72          | 0.00–6.42      | 0–0             | 0.00–0.00        |
|            | Apr 26 to May 2, 2021  | 1321     | 22–248        | 2.05–23.11     | 0–0             | 0.00–0.00        |
|            | May 3 to May 9, 2021   | 1236     | 0–202         | 0.00–19.54     | 0–0             | 0.00–0.00        |
|            | May 10 to May 16, 2021 | 1220     | 0–218         | 0.00–21.76     | 0–0             | 0.00–0.00        |
|            | May 17 to May 23, 2021 | 1083     | 0–103         | 0.00–10.51     | 0–0             | 0.00–0.00        |
|            | May 24 to May 30, 2021 | 1060     | 0–111         | 0.00–11.70     | 0–0             | 0.00–0.00        |
| Hokkaido   |                        |          |               |                |                 |                  |
|            | Apr 5 to Apr 11, 2021  | 42       | 0–0           | 0.00–0.00      | 0–4             | 0.00–8.70        |
|            | Apr 12 to Apr 18, 2021 | 44       | 0–0           | 0.00–0.00      | 0–1             | 0.00–2.22        |
|            | Apr 19 to Apr 25, 2021 | 33       | 0–0           | 0.00–0.00      | 0–12            | 0.00–26.67       |
|            | Apr 26 to May 2, 2021  | 48       | 0–4           | 0.00–9.09      | 0–0             | 0.00–0.00        |
|            | May 3 to May 9, 2021   | 58       | 0–15          | 0.00–34.88     | 0–0             | 0.00–0.00        |
|            | May 10 to May 16, 2021 | 49       | 0–7           | 0.00–16.67     | 0–0             | 0.00–0.00        |
|            | May 17 to May 23, 2021 | 55       | 0–11          | 0.00–25.00     | 0–0             | 0.00–0.00        |
|            | May 24 to May 30, 2021 | 42       | 0–0           | 0.00–0.00      | 0–0             | 0.00–0.00        |
| Aomori     |                        |          |               |                |                 |                  |
|            | Apr 5 to Apr 11, 2021  | 14       | 0–2           | 0.00–16.67     | 0–0             | 0.00–0.00        |
|            | Apr 12 to Apr 18, 2021 | 15       | 0–4           | 0.00–36.36     | 0–0             | 0.00–0.00        |
|            | Apr 19 to Apr 25, 2021 | 8        | 0–0           | 0.00–0.00      | 0–3             | 0.00–27.27       |
|            | Apr 26 to May 2, 2021  | 7        | 0–0           | 0.00–0.00      | 0–4             | 0.00–36.36       |
|            | May 3 to May 9, 2021   | 6        | 0–0           | 0.00–0.00      | 0–5             | 0.00–45.45       |
|            | May 10 to May 16, 2021 | 10       | 0–0           | 0.00–0.00      | 0–1             | 0.00–9.09        |
|            | May 17 to May 23, 2021 | 13       | 0–2           | 0.00–18.18     | 0–0             | 0.00–0.00        |
|            | May 24 to May 30, 2021 | 6        | 0–0           | 0.00–0.00      | 0–4             | 0.00–40.00       |
| Iwate      |                        |          |               |                |                 |                  |
|            | Apr 5 to Apr 11, 2021  | 17       | 0–0           | 0.00–0.00      | 0–2             | 0.00–10.53       |
|            | Apr 12 to Apr 18, 2021 | 14       | 0–0           | 0.00–0.00      | 0–4             | 0.00–22.22       |
|            | Apr 19 to Apr 25, 2021 | 11       | 0–0           | 0.00–0.00      | 0–6             | 0.00–35.29       |
|            | Apr 26 to May 2, 2021  | 23       | 0–7           | 0.00–43.75     | 0–0             | 0.00–0.00        |
|            | May 3 to May 9, 2021   | 15       | 0–0           | 0.00–0.00      | 0–0             | 0.00–0.00        |
|            | May 10 to May 16, 2021 | 19       | 0–5           | 0.00–35.71     | 0–0             | 0.00–0.00        |
|            | May 17 to May 23, 2021 | 15       | 0–1           | 0.00–7.14      | 0–0             | 0.00–0.00        |
|            | May 24 to May 30, 2021 | 13       | 0–0           | 0.00–0.00      | 0–1             | 0.00–7.14        |
| Miyagi     |                        |          |               |                |                 |                  |
|            | Apr 5 to Apr 11, 2021  | 33       | 0–10          | 0.00–43.48     | 0–0             | 0.00–0.00        |
|            | Apr 12 to Apr 18, 2021 | 18       | 0–0           | 0.00–0.00      | 0–4             | 0.00–18.18       |
|            | Apr 19 to Apr 25, 2021 | 19       | 0–0           | 0.00–0.00      | 0–2             | 0.00–9.52        |
|            | Apr 26 to May 2, 2021  | 27       | 0–7           | 0.00–35.00     | 0–0             | 0.00–0.00        |
|            | May 3 to May 9, 2021   | 21       | 0–2           | 0.00–10.53     | 0–0             | 0.00–0.00        |

|           |                        |    |      |              |     |            |
|-----------|------------------------|----|------|--------------|-----|------------|
|           | May 10 to May 16, 2021 | 18 | 0-0  | 0.00-0.00    | 0-1 | 0.00-5.26  |
|           | May 17 to May 23, 2021 | 16 | 0-0  | 0.00-0.00    | 0-1 | 0.00-5.88  |
|           | May 24 to May 30, 2021 | 18 | 0-1  | 0.00-5.88    | 0-0 | 0.00-0.00  |
| Akita     |                        |    |      |              |     |            |
|           | Apr 5 to Apr 11, 2021  | 7  | 0-0  | 0.00-0.00    | 0-3 | 0.00-30.00 |
|           | Apr 12 to Apr 18, 2021 | 7  | 0-0  | 0.00-0.00    | 0-3 | 0.00-30.00 |
|           | Apr 19 to Apr 25, 2021 | 7  | 0-0  | 0.00-0.00    | 0-2 | 0.00-22.22 |
|           | Apr 26 to May 2, 2021  | 7  | 0-0  | 0.00-0.00    | 0-1 | 0.00-12.50 |
|           | May 3 to May 9, 2021   | 9  | 0-1  | 0.00-12.50   | 0-0 | 0.00-0.00  |
|           | May 10 to May 16, 2021 | 10 | 0-2  | 0.00-25.00   | 0-0 | 0.00-0.00  |
|           | May 17 to May 23, 2021 | 5  | 0-0  | 0.00-0.00    | 0-3 | 0.00-37.50 |
|           | May 24 to May 30, 2021 | 7  | 0-0  | 0.00-0.00    | 0-1 | 0.00-12.50 |
| Yamagata  |                        |    |      |              |     |            |
|           | Apr 5 to Apr 11, 2021  | 9  | 0-0  | 0.00-0.00    | 0-4 | 0.00-30.77 |
|           | Apr 12 to Apr 18, 2021 | 11 | 0-0  | 0.00-0.00    | 0-1 | 0.00-8.33  |
|           | Apr 19 to Apr 25, 2021 | 13 | 0-1  | 0.00-8.33    | 0-0 | 0.00-0.00  |
|           | Apr 26 to May 2, 2021  | 11 | 0-0  | 0.00-0.00    | 0-1 | 0.00-8.33  |
|           | May 3 to May 9, 2021   | 15 | 0-3  | 0.00-25.00   | 0-0 | 0.00-0.00  |
|           | May 10 to May 16, 2021 | 18 | 0-6  | 0.00-50.00   | 0-0 | 0.00-0.00  |
|           | May 17 to May 23, 2021 | 11 | 0-0  | 0.00-0.00    | 0-0 | 0.00-0.00  |
|           | May 24 to May 30, 2021 | 22 | 3-11 | 27.27-100.00 | 0-0 | 0.00-0.00  |
| Fukushima |                        |    |      |              |     |            |
|           | Apr 5 to Apr 11, 2021  | 22 | 0-0  | 0.00-0.00    | 0-2 | 0.00-8.33  |
|           | Apr 12 to Apr 18, 2021 | 27 | 0-4  | 0.00-17.39   | 0-0 | 0.00-0.00  |
|           | Apr 19 to Apr 25, 2021 | 24 | 0-3  | 0.00-14.29   | 0-0 | 0.00-0.00  |
|           | Apr 26 to May 2, 2021  | 25 | 0-4  | 0.00-19.05   | 0-0 | 0.00-0.00  |
|           | May 3 to May 9, 2021   | 21 | 0-1  | 0.00-5.00    | 0-0 | 0.00-0.00  |
|           | May 10 to May 16, 2021 | 22 | 0-2  | 0.00-10.00   | 0-0 | 0.00-0.00  |
|           | May 17 to May 23, 2021 | 21 | 0-2  | 0.00-10.53   | 0-0 | 0.00-0.00  |
|           | May 24 to May 30, 2021 | 19 | 0-1  | 0.00-5.56    | 0-0 | 0.00-0.00  |
| Ibaraki   |                        |    |      |              |     |            |
|           | Apr 5 to Apr 11, 2021  | 38 | 0-9  | 0.00-31.03   | 0-0 | 0.00-0.00  |
|           | Apr 12 to Apr 18, 2021 | 32 | 0-4  | 0.00-14.29   | 0-0 | 0.00-0.00  |
|           | Apr 19 to Apr 25, 2021 | 25 | 0-0  | 0.00-0.00    | 0-2 | 0.00-7.41  |
|           | Apr 26 to May 2, 2021  | 22 | 0-0  | 0.00-0.00    | 0-5 | 0.00-18.52 |
|           | May 3 to May 9, 2021   | 25 | 0-0  | 0.00-0.00    | 0-0 | 0.00-0.00  |
|           | May 10 to May 16, 2021 | 38 | 4-15 | 17.39-65.22  | 0-0 | 0.00-0.00  |
|           | May 17 to May 23, 2021 | 19 | 0-0  | 0.00-0.00    | 0-3 | 0.00-13.64 |
|           | May 24 to May 30, 2021 | 24 | 0-2  | 0.00-9.09    | 0-0 | 0.00-0.00  |
| Tochigi   |                        |    |      |              |     |            |
|           | Apr 5 to Apr 11, 2021  | 32 | 0-7  | 0.00-28.00   | 0-0 | 0.00-0.00  |
|           | Apr 12 to Apr 18, 2021 | 30 | 0-7  | 0.00-30.43   | 0-0 | 0.00-0.00  |
|           | Apr 19 to Apr 25, 2021 | 31 | 0-9  | 0.00-40.91   | 0-0 | 0.00-0.00  |
|           | Apr 26 to May 2, 2021  | 22 | 0-1  | 0.00-4.76    | 0-0 | 0.00-0.00  |
|           | May 3 to May 9, 2021   | 20 | 0-0  | 0.00-0.00    | 0-0 | 0.00-0.00  |
|           | May 10 to May 16, 2021 | 22 | 0-4  | 0.00-22.22   | 0-0 | 0.00-0.00  |

|          |                        |     |      |             |      |            |
|----------|------------------------|-----|------|-------------|------|------------|
|          | May 17 to May 23, 2021 | 32  | 5-14 | 27.78-77.78 | 0-0  | 0.00-0.00  |
|          | May 24 to May 30, 2021 | 22  | 0-4  | 0.00-22.22  | 0-0  | 0.00-0.00  |
| Gunma    |                        |     |      |             |      |            |
|          | Apr 5 to Apr 11, 2021  | 21  | 0-0  | 0.00-0.00   | 0-1  | 0.00-4.55  |
|          | Apr 12 to Apr 18, 2021 | 21  | 0-1  | 0.00-5.00   | 0-0  | 0.00-0.00  |
|          | Apr 19 to Apr 25, 2021 | 24  | 0-4  | 0.00-20.00  | 0-0  | 0.00-0.00  |
|          | Apr 26 to May 2, 2021  | 30  | 0-10 | 0.00-50.00  | 0-0  | 0.00-0.00  |
|          | May 3 to May 9, 2021   | 23  | 0-4  | 0.00-21.05  | 0-0  | 0.00-0.00  |
|          | May 10 to May 16, 2021 | 17  | 0-0  | 0.00-0.00   | 0-2  | 0.00-10.53 |
|          | May 17 to May 23, 2021 | 17  | 0-0  | 0.00-0.00   | 0-1  | 0.00-5.56  |
|          | May 24 to May 30, 2021 | 17  | 0-0  | 0.00-0.00   | 0-0  | 0.00-0.00  |
| Saitama  |                        |     |      |             |      |            |
|          | Apr 5 to Apr 11, 2021  | 46  | 0-0  | 0.00-0.00   | 0-15 | 0.00-24.59 |
|          | Apr 12 to Apr 18, 2021 | 75  | 0-17 | 0.00-29.31  | 0-0  | 0.00-0.00  |
|          | Apr 19 to Apr 25, 2021 | 58  | 0-1  | 0.00-1.75   | 0-0  | 0.00-0.00  |
|          | Apr 26 to May 2, 2021  | 81  | 6-26 | 10.91-47.27 | 0-0  | 0.00-0.00  |
|          | May 3 to May 9, 2021   | 64  | 0-13 | 0.00-25.49  | 0-0  | 0.00-0.00  |
|          | May 10 to May 16, 2021 | 56  | 0-5  | 0.00-9.80   | 0-0  | 0.00-0.00  |
|          | May 17 to May 23, 2021 | 56  | 0-7  | 0.00-14.29  | 0-0  | 0.00-0.00  |
|          | May 24 to May 30, 2021 | 49  | 0-1  | 0.00-2.08   | 0-0  | 0.00-0.00  |
| Chiba    |                        |     |      |             |      |            |
|          | Apr 5 to Apr 11, 2021  | 56  | 0-0  | 0.00-0.00   | 0-10 | 0.00-15.15 |
|          | Apr 12 to Apr 18, 2021 | 74  | 0-9  | 0.00-13.85  | 0-0  | 0.00-0.00  |
|          | Apr 19 to Apr 25, 2021 | 73  | 0-10 | 0.00-15.87  | 0-0  | 0.00-0.00  |
|          | Apr 26 to May 2, 2021  | 71  | 0-11 | 0.00-18.33  | 0-0  | 0.00-0.00  |
|          | May 3 to May 9, 2021   | 54  | 0-0  | 0.00-0.00   | 0-4  | 0.00-6.90  |
|          | May 10 to May 16, 2021 | 78  | 1-22 | 1.79-39.29  | 0-0  | 0.00-0.00  |
|          | May 17 to May 23, 2021 | 57  | 0-2  | 0.00-3.64   | 0-0  | 0.00-0.00  |
|          | May 24 to May 30, 2021 | 50  | 0-0  | 0.00-0.00   | 0-2  | 0.00-3.85  |
| Tokyo    |                        |     |      |             |      |            |
|          | Apr 5 to Apr 11, 2021  | 127 | 0-0  | 0.00-0.00   | 0-8  | 0.00-5.93  |
|          | Apr 12 to Apr 18, 2021 | 153 | 0-23 | 0.00-17.69  | 0-0  | 0.00-0.00  |
|          | Apr 19 to Apr 25, 2021 | 156 | 0-32 | 0.00-25.81  | 0-0  | 0.00-0.00  |
|          | Apr 26 to May 2, 2021  | 139 | 0-20 | 0.00-16.81  | 0-0  | 0.00-0.00  |
|          | May 3 to May 9, 2021   | 121 | 0-8  | 0.00-7.08   | 0-0  | 0.00-0.00  |
|          | May 10 to May 16, 2021 | 105 | 0-0  | 0.00-0.00   | 0-4  | 0.00-3.67  |
|          | May 17 to May 23, 2021 | 105 | 0-0  | 0.00-0.00   | 0-1  | 0.00-0.94  |
|          | May 24 to May 30, 2021 | 97  | 0-0  | 0.00-0.00   | 0-6  | 0.00-5.83  |
| Kanagawa |                        |     |      |             |      |            |
|          | Apr 5 to Apr 11, 2021  | 85  | 0-0  | 0.00-0.00   | 0-1  | 0.00-1.16  |
|          | Apr 12 to Apr 18, 2021 | 75  | 0-0  | 0.00-0.00   | 0-8  | 0.00-9.64  |
|          | Apr 19 to Apr 25, 2021 | 76  | 0-0  | 0.00-0.00   | 0-7  | 0.00-8.43  |
|          | Apr 26 to May 2, 2021  | 110 | 5-32 | 6.41-41.03  | 0-0  | 0.00-0.00  |
|          | May 3 to May 9, 2021   | 81  | 0-4  | 0.00-5.19   | 0-0  | 0.00-0.00  |
|          | May 10 to May 16, 2021 | 77  | 0-0  | 0.00-0.00   | 0-0  | 0.00-0.00  |
|          | May 17 to May 23, 2021 | 67  | 0-0  | 0.00-0.00   | 0-8  | 0.00-10.67 |

|                        |                        |     |            |              |           |            |
|------------------------|------------------------|-----|------------|--------------|-----------|------------|
| Niigata                | May 24 to May 30, 2021 | 59  | 0-0        | 0.00-0.00    | 0-13      | 0.00-18.06 |
|                        | Apr 5 to Apr 11, 2021  | 25  | 0-6        | 0.00-31.58   | 0-0       | 0.00-0.00  |
|                        | Apr 12 to Apr 18, 2021 | 29  | 2-10       | 10.53-52.63  | 0-0       | 0.00-0.00  |
|                        | Apr 19 to Apr 25, 2021 | 11  | 0-0        | 0.00-0.00    | 0-7       | 0.00-38.89 |
|                        | Apr 26 to May 2, 2021  | 19  | 0-1        | 0.00-5.56    | 0-0       | 0.00-0.00  |
|                        | May 3 to May 9, 2021   | 15  | 0-0        | 0.00-0.00    | 0-2       | 0.00-11.76 |
|                        | May 10 to May 16, 2021 | 19  | 0-3        | 0.00-18.75   | 0-0       | 0.00-0.00  |
|                        | May 17 to May 23, 2021 | 15  | 0-0        | 0.00-0.00    | 0-0       | 0.00-0.00  |
| Toyama                 | May 24 to May 30, 2021 | 15  | 0-0        | 0.00-0.00    | 0-0       | 0.00-0.00  |
|                        | Apr 5 to Apr 11, 2021  | 10  | 0-3        | 0.00-42.86   | 0-0       | 0.00-0.00  |
|                        | Apr 12 to Apr 18, 2021 | 4   | 0-0        | 0.00-0.00    | 0-2       | 0.00-33.33 |
|                        | Apr 19 to Apr 25, 2021 | 7   | 0-1        | 0.00-16.67   | 0-0       | 0.00-0.00  |
|                        | Apr 26 to May 2, 2021  | 5   | 0-0        | 0.00-0.00    | 0-1       | 0.00-16.67 |
|                        | May 3 to May 9, 2021   | 13  | 2-7        | 33.33-116.67 | 0-0       | 0.00-0.00  |
|                        | May 10 to May 16, 2021 | 4   | 0-0        | 0.00-0.00    | 0-2       | 0.00-33.33 |
|                        | May 17 to May 23, 2021 | 5   | 0-0        | 0.00-0.00    | 0-1       | 0.00-16.67 |
| Ishikawa               | May 24 to May 30, 2021 | 13  | 3-8        | 60.00-160.00 | 0-0       | 0.00-0.00  |
|                        | Apr 5 to Apr 11, 2021  | 15  | 1-7        | 12.50-87.50  | 0-0       | 0.00-0.00  |
|                        | Apr 12 to Apr 18, 2021 | 12  | 0-4        | 0.00-50.00   | 0-0       | 0.00-0.00  |
|                        | Apr 19 to Apr 25, 2021 | 8   | 0-0        | 0.00-0.00    | 0-0       | 0.00-0.00  |
|                        | Apr 26 to May 2, 2021  | 8   | 0-1        | 0.00-14.29   | 0-0       | 0.00-0.00  |
|                        | May 3 to May 9, 2021   | 13  | 0-6        | 0.00-85.71   | 0-0       | 0.00-0.00  |
|                        | May 10 to May 16, 2021 | 7   | 0-0        | 0.00-0.00    | 0-1       | 0.00-12.50 |
|                        | May 17 to May 23, 2021 | 9   | 0-1        | 0.00-12.50   | 0-0       | 0.00-0.00  |
| Fukui                  | May 24 to May 30, 2021 | 9   | 0-2        | 0.00-28.57   | 0-0       | 0.00-0.00  |
|                        | Apr 5 to Apr 11, 2021  | 11  | 0-0        | 0.00-0.00    | 0-0       | 0.00-0.00  |
|                        | Apr 12 to Apr 18, 2021 | 7   | 0-0        | 0.00-0.00    | 0-3       | 0.00-30.00 |
|                        | Apr 19 to Apr 25, 2021 | 6   | 0-0        | 0.00-0.00    | 0-4       | 0.00-40.00 |
|                        | Apr 26 to May 2, 2021  | 10  | 0-1        | 0.00-11.11   | 0-0       | 0.00-0.00  |
|                        | May 3 to May 9, 2021   | 17  | 0-8        | 0.00-88.89   | 0-0       | 0.00-0.00  |
|                        | May 10 to May 16, 2021 | 12  | 0-4        | 0.00-50.00   | 0-0       | 0.00-0.00  |
|                        | May 17 to May 23, 2021 | 6   | 0-0        | 0.00-0.00    | 0-2       | 0.00-25.00 |
| Yamanashi              | May 24 to May 30, 2021 | 6   | 0-0        | 0.00-0.00    | 0-2       | 0.00-25.00 |
|                        | Apr 5 to Apr 11, 2021  | 7   | 0-0        | 0.00-0.00    | 0-0       | 0.00-0.00  |
|                        | Apr 12 to Apr 18, 2021 | 9   | 0-2        | 0.00-28.57   | 0-0       | 0.00-0.00  |
|                        | Apr 19 to Apr 25, 2021 | 4   | 0-0        | 0.00-0.00    | 0-2       | 0.00-33.33 |
|                        | Apr 26 to May 2, 2021  | 10  | 0-4        | 0.00-66.67   | 0-0       | 0.00-0.00  |
|                        | May 3 to May 9, 2021   | 9   | 0-3        | 0.00-50.00   | 0-0       | 0.00-0.00  |
|                        | May 10 to May 16, 2021 | 8   | 0-2        | 0.00-33.33   | 0-0       | 0.00-0.00  |
|                        | May 17 to May 23, 2021 | 7   | 0-1        | 0.00-16.67   | 0-0       | 0.00-0.00  |
| May 24 to May 30, 2021 | 9                      | 0-3 | 0.00-50.00 | 0-0          | 0.00-0.00 |            |

Nagano

|                        |    |     |            |     |            |
|------------------------|----|-----|------------|-----|------------|
| Apr 5 to Apr 11, 2021  | 24 | 0-5 | 0.00-26.32 | 0-0 | 0.00-0.00  |
| Apr 12 to Apr 18, 2021 | 21 | 0-2 | 0.00-10.53 | 0-0 | 0.00-0.00  |
| Apr 19 to Apr 25, 2021 | 25 | 0-6 | 0.00-31.58 | 0-0 | 0.00-0.00  |
| Apr 26 to May 2, 2021  | 16 | 0-0 | 0.00-0.00  | 0-2 | 0.00-11.11 |
| May 3 to May 9, 2021   | 16 | 0-0 | 0.00-0.00  | 0-2 | 0.00-11.11 |
| May 10 to May 16, 2021 | 13 | 0-0 | 0.00-0.00  | 0-5 | 0.00-27.78 |
| May 17 to May 23, 2021 | 20 | 0-3 | 0.00-17.65 | 0-0 | 0.00-0.00  |
| May 24 to May 30, 2021 | 14 | 0-0 | 0.00-0.00  | 0-3 | 0.00-17.65 |

Gifu

|                        |    |     |            |     |            |
|------------------------|----|-----|------------|-----|------------|
| Apr 5 to Apr 11, 2021  | 12 | 0-0 | 0.00-0.00  | 0-4 | 0.00-25.00 |
| Apr 12 to Apr 18, 2021 | 17 | 0-2 | 0.00-13.33 | 0-0 | 0.00-0.00  |
| Apr 19 to Apr 25, 2021 | 15 | 0-0 | 0.00-0.00  | 0-0 | 0.00-0.00  |
| Apr 26 to May 2, 2021  | 8  | 0-0 | 0.00-0.00  | 0-6 | 0.00-42.86 |
| May 3 to May 9, 2021   | 9  | 0-0 | 0.00-0.00  | 0-5 | 0.00-35.71 |
| May 10 to May 16, 2021 | 13 | 0-0 | 0.00-0.00  | 0-0 | 0.00-0.00  |
| May 17 to May 23, 2021 | 14 | 0-2 | 0.00-16.67 | 0-0 | 0.00-0.00  |
| May 24 to May 30, 2021 | 17 | 0-5 | 0.00-41.67 | 0-0 | 0.00-0.00  |

Shizuoka

|                        |    |      |            |      |            |
|------------------------|----|------|------------|------|------------|
| Apr 5 to Apr 11, 2021  | 51 | 0-13 | 0.00-34.21 | 0-0  | 0.00-0.00  |
| Apr 12 to Apr 18, 2021 | 25 | 0-0  | 0.00-0.00  | 0-12 | 0.00-32.43 |
| Apr 19 to Apr 25, 2021 | 36 | 0-0  | 0.00-0.00  | 0-0  | 0.00-0.00  |
| Apr 26 to May 2, 2021  | 37 | 0-2  | 0.00-5.71  | 0-0  | 0.00-0.00  |
| May 3 to May 9, 2021   | 36 | 0-2  | 0.00-5.88  | 0-0  | 0.00-0.00  |
| May 10 to May 16, 2021 | 32 | 0-0  | 0.00-0.00  | 0-1  | 0.00-3.03  |
| May 17 to May 23, 2021 | 27 | 0-0  | 0.00-0.00  | 0-5  | 0.00-15.63 |
| May 24 to May 30, 2021 | 36 | 0-5  | 0.00-16.13 | 0-0  | 0.00-0.00  |

Aichi

|                        |    |      |            |     |            |
|------------------------|----|------|------------|-----|------------|
| Apr 5 to Apr 11, 2021  | 55 | 0-5  | 0.00-10.00 | 0-0 | 0.00-0.00  |
| Apr 12 to Apr 18, 2021 | 54 | 0-5  | 0.00-10.20 | 0-0 | 0.00-0.00  |
| Apr 19 to Apr 25, 2021 | 45 | 0-0  | 0.00-0.00  | 0-1 | 0.00-2.17  |
| Apr 26 to May 2, 2021  | 47 | 0-1  | 0.00-2.17  | 0-0 | 0.00-0.00  |
| May 3 to May 9, 2021   | 44 | 0-0  | 0.00-0.00  | 0-0 | 0.00-0.00  |
| May 10 to May 16, 2021 | 62 | 2-19 | 4.65-44.19 | 0-0 | 0.00-0.00  |
| May 17 to May 23, 2021 | 34 | 0-0  | 0.00-0.00  | 0-7 | 0.00-17.07 |
| May 24 to May 30, 2021 | 45 | 0-5  | 0.00-12.50 | 0-0 | 0.00-0.00  |

Mie

|                        |    |     |            |     |            |
|------------------------|----|-----|------------|-----|------------|
| Apr 5 to Apr 11, 2021  | 17 | 0-0 | 0.00-0.00  | 0-2 | 0.00-10.53 |
| Apr 12 to Apr 18, 2021 | 24 | 0-7 | 0.00-41.18 | 0-0 | 0.00-0.00  |
| Apr 19 to Apr 25, 2021 | 20 | 0-3 | 0.00-17.65 | 0-0 | 0.00-0.00  |
| Apr 26 to May 2, 2021  | 17 | 0-1 | 0.00-6.25  | 0-0 | 0.00-0.00  |
| May 3 to May 9, 2021   | 19 | 0-3 | 0.00-18.75 | 0-0 | 0.00-0.00  |
| May 10 to May 16, 2021 | 12 | 0-0 | 0.00-0.00  | 0-3 | 0.00-20.00 |
| May 17 to May 23, 2021 | 16 | 0-1 | 0.00-6.67  | 0-0 | 0.00-0.00  |
| May 24 to May 30, 2021 | 11 | 0-0 | 0.00-0.00  | 0-3 | 0.00-21.43 |

Shiga

|          |                        |     |       |             |     |            |
|----------|------------------------|-----|-------|-------------|-----|------------|
|          | Apr 5 to Apr 11, 2021  | 9   | 0-0   | 0.00-0.00   | 0-5 | 0.00-35.71 |
|          | Apr 12 to Apr 18, 2021 | 12  | 0-0   | 0.00-0.00   | 0-1 | 0.00-7.69  |
|          | Apr 19 to Apr 25, 2021 | 10  | 0-0   | 0.00-0.00   | 0-2 | 0.00-16.67 |
|          | Apr 26 to May 2, 2021  | 15  | 0-3   | 0.00-25.00  | 0-0 | 0.00-0.00  |
|          | May 3 to May 9, 2021   | 17  | 0-7   | 0.00-70.00  | 0-0 | 0.00-0.00  |
|          | May 10 to May 16, 2021 | 11  | 0-0   | 0.00-0.00   | 0-0 | 0.00-0.00  |
|          | May 17 to May 23, 2021 | 16  | 0-6   | 0.00-60.00  | 0-0 | 0.00-0.00  |
|          | May 24 to May 30, 2021 | 14  | 0-4   | 0.00-40.00  | 0-0 | 0.00-0.00  |
| Kyoto    |                        |     |       |             |     |            |
|          | Apr 5 to Apr 11, 2021  | 27  | 0-0   | 0.00-0.00   | 0-3 | 0.00-10.00 |
|          | Apr 12 to Apr 18, 2021 | 37  | 0-7   | 0.00-23.33  | 0-0 | 0.00-0.00  |
|          | Apr 19 to Apr 25, 2021 | 31  | 0-2   | 0.00-6.90   | 0-0 | 0.00-0.00  |
|          | Apr 26 to May 2, 2021  | 30  | 0-3   | 0.00-11.11  | 0-0 | 0.00-0.00  |
|          | May 3 to May 9, 2021   | 37  | 0-10  | 0.00-37.04  | 0-0 | 0.00-0.00  |
|          | May 10 to May 16, 2021 | 42  | 4-17  | 16.00-68.00 | 0-0 | 0.00-0.00  |
|          | May 17 to May 23, 2021 | 37  | 0-13  | 0.00-54.17  | 0-0 | 0.00-0.00  |
|          | May 24 to May 30, 2021 | 32  | 0-8   | 0.00-33.33  | 0-0 | 0.00-0.00  |
| Osaka    |                        |     |       |             |     |            |
|          | Apr 5 to Apr 11, 2021  | 118 | 0-0   | 0.00-0.00   | 0-0 | 0.00-0.00  |
|          | Apr 12 to Apr 18, 2021 | 117 | 0-5   | 0.00-4.46   | 0-0 | 0.00-0.00  |
|          | Apr 19 to Apr 25, 2021 | 111 | 0-3   | 0.00-2.78   | 0-0 | 0.00-0.00  |
|          | Apr 26 to May 2, 2021  | 144 | 11-41 | 10.68-39.81 | 0-0 | 0.00-0.00  |
|          | May 3 to May 9, 2021   | 132 | 0-32  | 0.00-32.00  | 0-0 | 0.00-0.00  |
|          | May 10 to May 16, 2021 | 135 | 8-38  | 8.25-39.18  | 0-0 | 0.00-0.00  |
|          | May 17 to May 23, 2021 | 113 | 0-19  | 0.00-20.21  | 0-0 | 0.00-0.00  |
|          | May 24 to May 30, 2021 | 109 | 0-19  | 0.00-21.11  | 0-0 | 0.00-0.00  |
| Hyogo    |                        |     |       |             |     |            |
|          | Apr 5 to Apr 11, 2021  | 69  | 0-7   | 0.00-11.29  | 0-0 | 0.00-0.00  |
|          | Apr 12 to Apr 18, 2021 | 68  | 0-6   | 0.00-9.68   | 0-0 | 0.00-0.00  |
|          | Apr 19 to Apr 25, 2021 | 67  | 0-7   | 0.00-11.67  | 0-0 | 0.00-0.00  |
|          | Apr 26 to May 2, 2021  | 72  | 0-15  | 0.00-26.32  | 0-0 | 0.00-0.00  |
|          | May 3 to May 9, 2021   | 66  | 0-12  | 0.00-22.22  | 0-0 | 0.00-0.00  |
|          | May 10 to May 16, 2021 | 66  | 0-13  | 0.00-24.53  | 0-0 | 0.00-0.00  |
|          | May 17 to May 23, 2021 | 56  | 0-5   | 0.00-9.80   | 0-0 | 0.00-0.00  |
|          | May 24 to May 30, 2021 | 79  | 8-29  | 16.00-58.00 | 0-0 | 0.00-0.00  |
| Nara     |                        |     |       |             |     |            |
|          | Apr 5 to Apr 11, 2021  | 18  | 0-1   | 0.00-5.88   | 0-0 | 0.00-0.00  |
|          | Apr 12 to Apr 18, 2021 | 24  | 0-7   | 0.00-41.18  | 0-0 | 0.00-0.00  |
|          | Apr 19 to Apr 25, 2021 | 11  | 0-0   | 0.00-0.00   | 0-6 | 0.00-35.29 |
|          | Apr 26 to May 2, 2021  | 24  | 0-8   | 0.00-50.00  | 0-0 | 0.00-0.00  |
|          | May 3 to May 9, 2021   | 14  | 0-0   | 0.00-0.00   | 0-2 | 0.00-12.50 |
|          | May 10 to May 16, 2021 | 14  | 0-0   | 0.00-0.00   | 0-1 | 0.00-6.67  |
|          | May 17 to May 23, 2021 | 12  | 0-0   | 0.00-0.00   | 0-3 | 0.00-20.00 |
|          | May 24 to May 30, 2021 | 8   | 0-0   | 0.00-0.00   | 0-6 | 0.00-42.86 |
| Wakayama |                        |     |       |             |     |            |
|          | Apr 5 to Apr 11, 2021  | 10  | 0-0   | 0.00-0.00   | 0-2 | 0.00-16.67 |



|           |                        |    |      |             |     |            |
|-----------|------------------------|----|------|-------------|-----|------------|
|           | Apr 12 to Apr 18, 2021 | 10 | 0-0  | 0.00-0.00   | 0-1 | 0.00-9.09  |
|           | Apr 19 to Apr 25, 2021 | 15 | 0-4  | 0.00-36.36  | 0-0 | 0.00-0.00  |
|           | Apr 26 to May 2, 2021  | 15 | 0-5  | 0.00-50.00  | 0-0 | 0.00-0.00  |
|           | May 3 to May 9, 2021   | 11 | 0-1  | 0.00-10.00  | 0-0 | 0.00-0.00  |
|           | May 10 to May 16, 2021 | 14 | 0-5  | 0.00-55.56  | 0-0 | 0.00-0.00  |
|           | May 17 to May 23, 2021 | 6  | 0-0  | 0.00-0.00   | 0-4 | 0.00-40.00 |
|           | May 24 to May 30, 2021 | 6  | 0-0  | 0.00-0.00   | 0-4 | 0.00-40.00 |
| Tottori   |                        |    |      |             |     |            |
|           | Apr 5 to Apr 11, 2021  | 5  | 0-0  | 0.00-0.00   | 0-0 | 0.00-0.00  |
|           | Apr 12 to Apr 18, 2021 | 9  | 0-4  | 0.00-80.00  | 0-0 | 0.00-0.00  |
|           | Apr 19 to Apr 25, 2021 | 6  | 0-1  | 0.00-20.00  | 0-0 | 0.00-0.00  |
|           | Apr 26 to May 2, 2021  | 2  | 0-0  | 0.00-0.00   | 0-3 | 0.00-60.00 |
|           | May 3 to May 9, 2021   | 10 | 0-5  | 0.00-100.00 | 0-0 | 0.00-0.00  |
|           | May 10 to May 16, 2021 | 8  | 0-3  | 0.00-60.00  | 0-0 | 0.00-0.00  |
|           | May 17 to May 23, 2021 | 8  | 0-3  | 0.00-60.00  | 0-0 | 0.00-0.00  |
|           | May 24 to May 30, 2021 | 5  | 0-1  | 0.00-25.00  | 0-0 | 0.00-0.00  |
| Shimane   |                        |    |      |             |     |            |
|           | Apr 5 to Apr 11, 2021  | 5  | 0-0  | 0.00-0.00   | 0-2 | 0.00-28.57 |
|           | Apr 12 to Apr 18, 2021 | 12 | 0-5  | 0.00-71.43  | 0-0 | 0.00-0.00  |
|           | Apr 19 to Apr 25, 2021 | 5  | 0-0  | 0.00-0.00   | 0-2 | 0.00-28.57 |
|           | Apr 26 to May 2, 2021  | 5  | 0-0  | 0.00-0.00   | 0-2 | 0.00-28.57 |
|           | May 3 to May 9, 2021   | 7  | 0-1  | 0.00-16.67  | 0-0 | 0.00-0.00  |
|           | May 10 to May 16, 2021 | 3  | 0-0  | 0.00-0.00   | 0-3 | 0.00-50.00 |
|           | May 17 to May 23, 2021 | 6  | 0-0  | 0.00-0.00   | 0-0 | 0.00-0.00  |
|           | May 24 to May 30, 2021 | 6  | 0-0  | 0.00-0.00   | 0-0 | 0.00-0.00  |
| Okayama   |                        |    |      |             |     |            |
|           | Apr 5 to Apr 11, 2021  | 16 | 0-0  | 0.00-0.00   | 0-4 | 0.00-20.00 |
|           | Apr 12 to Apr 18, 2021 | 9  | 0-0  | 0.00-0.00   | 0-9 | 0.00-50.00 |
|           | Apr 19 to Apr 25, 2021 | 15 | 0-0  | 0.00-0.00   | 0-3 | 0.00-16.67 |
|           | Apr 26 to May 2, 2021  | 20 | 0-3  | 0.00-17.65  | 0-0 | 0.00-0.00  |
|           | May 3 to May 9, 2021   | 22 | 0-6  | 0.00-37.50  | 0-0 | 0.00-0.00  |
|           | May 10 to May 16, 2021 | 25 | 0-10 | 0.00-66.67  | 0-0 | 0.00-0.00  |
|           | May 17 to May 23, 2021 | 16 | 0-1  | 0.00-6.67   | 0-0 | 0.00-0.00  |
|           | May 24 to May 30, 2021 | 24 | 1-10 | 7.14-71.43  | 0-0 | 0.00-0.00  |
| Hiroshima |                        |    |      |             |     |            |
|           | Apr 5 to Apr 11, 2021  | 38 | 2-12 | 7.69-46.15  | 0-0 | 0.00-0.00  |
|           | Apr 12 to Apr 18, 2021 | 43 | 7-18 | 28.00-72.00 | 0-0 | 0.00-0.00  |
|           | Apr 19 to Apr 25, 2021 | 31 | 0-7  | 0.00-29.17  | 0-0 | 0.00-0.00  |
|           | Apr 26 to May 2, 2021  | 31 | 0-7  | 0.00-29.17  | 0-0 | 0.00-0.00  |
|           | May 3 to May 9, 2021   | 17 | 0-0  | 0.00-0.00   | 0-6 | 0.00-26.09 |
|           | May 10 to May 16, 2021 | 23 | 0-1  | 0.00-4.55   | 0-0 | 0.00-0.00  |
|           | May 17 to May 23, 2021 | 21 | 0-0  | 0.00-0.00   | 0-1 | 0.00-4.55  |
|           | May 24 to May 30, 2021 | 18 | 0-0  | 0.00-0.00   | 0-4 | 0.00-18.18 |
| Yamaguchi |                        |    |      |             |     |            |
|           | Apr 5 to Apr 11, 2021  | 16 | 0-0  | 0.00-0.00   | 0-4 | 0.00-20.00 |
|           | Apr 12 to Apr 18, 2021 | 17 | 0-0  | 0.00-0.00   | 0-2 | 0.00-10.53 |

|           |                        |    |     |              |     |             |
|-----------|------------------------|----|-----|--------------|-----|-------------|
|           | Apr 19 to Apr 25, 2021 | 21 | 0-3 | 0.00-16.67   | 0-0 | 0.00-0.00   |
|           | Apr 26 to May 2, 2021  | 23 | 0-6 | 0.00-35.29   | 0-0 | 0.00-0.00   |
|           | May 3 to May 9, 2021   | 17 | 0-1 | 0.00-6.25    | 0-0 | 0.00-0.00   |
|           | May 10 to May 16, 2021 | 10 | 0-0 | 0.00-0.00    | 0-5 | 0.00-33.33  |
|           | May 17 to May 23, 2021 | 21 | 0-6 | 0.00-40.00   | 0-0 | 0.00-0.00   |
|           | May 24 to May 30, 2021 | 13 | 0-0 | 0.00-0.00    | 0-1 | 0.00-7.14   |
| Tokushima |                        |    |     |              |     |             |
|           | Apr 5 to Apr 11, 2021  | 7  | 0-1 | 0.00-16.67   | 0-0 | 0.00-0.00   |
|           | Apr 12 to Apr 18, 2021 | 10 | 0-5 | 0.00-100.00  | 0-0 | 0.00-0.00   |
|           | Apr 19 to Apr 25, 2021 | 4  | 0-0 | 0.00-0.00    | 0-1 | 0.00-20.00  |
|           | Apr 26 to May 2, 2021  | 14 | 3-8 | 50.00-133.33 | 0-0 | 0.00-0.00   |
|           | May 3 to May 9, 2021   | 12 | 2-6 | 33.33-100.00 | 0-0 | 0.00-0.00   |
|           | May 10 to May 16, 2021 | 9  | 0-4 | 0.00-80.00   | 0-0 | 0.00-0.00   |
|           | May 17 to May 23, 2021 | 7  | 0-2 | 0.00-40.00   | 0-0 | 0.00-0.00   |
|           | May 24 to May 30, 2021 | 7  | 0-2 | 0.00-40.00   | 0-0 | 0.00-0.00   |
| Kagawa    |                        |    |     |              |     |             |
|           | Apr 5 to Apr 11, 2021  | 16 | 0-3 | 0.00-23.08   | 0-0 | 0.00-0.00   |
|           | Apr 12 to Apr 18, 2021 | 19 | 0-6 | 0.00-46.15   | 0-0 | 0.00-0.00   |
|           | Apr 19 to Apr 25, 2021 | 17 | 0-6 | 0.00-54.55   | 0-0 | 0.00-0.00   |
|           | Apr 26 to May 2, 2021  | 13 | 0-2 | 0.00-18.18   | 0-0 | 0.00-0.00   |
|           | May 3 to May 9, 2021   | 9  | 0-0 | 0.00-0.00    | 0-1 | 0.00-10.00  |
|           | May 10 to May 16, 2021 | 13 | 0-3 | 0.00-30.00   | 0-0 | 0.00-0.00   |
|           | May 17 to May 23, 2021 | 9  | 0-0 | 0.00-0.00    | 0-0 | 0.00-0.00   |
|           | May 24 to May 30, 2021 | 7  | 0-0 | 0.00-0.00    | 0-2 | 0.00-22.22  |
| Ehime     |                        |    |     |              |     |             |
|           | Apr 5 to Apr 11, 2021  | 14 | 0-0 | 0.00-0.00    | 0-3 | 0.00-17.65  |
|           | Apr 12 to Apr 18, 2021 | 25 | 0-8 | 0.00-47.06   | 0-0 | 0.00-0.00   |
|           | Apr 19 to Apr 25, 2021 | 24 | 0-8 | 0.00-50.00   | 0-0 | 0.00-0.00   |
|           | Apr 26 to May 2, 2021  | 19 | 0-3 | 0.00-18.75   | 0-0 | 0.00-0.00   |
|           | May 3 to May 9, 2021   | 22 | 0-8 | 0.00-57.14   | 0-0 | 0.00-0.00   |
|           | May 10 to May 16, 2021 | 23 | 1-9 | 7.14-64.29   | 0-0 | 0.00-0.00   |
|           | May 17 to May 23, 2021 | 12 | 0-0 | 0.00-0.00    | 0-1 | 0.00-7.69   |
|           | May 24 to May 30, 2021 | 11 | 0-0 | 0.00-0.00    | 0-2 | 0.00-15.38  |
| Kochi     |                        |    |     |              |     |             |
|           | Apr 5 to Apr 11, 2021  | 7  | 0-0 | 0.00-0.00    | 0-0 | 0.00-0.00   |
|           | Apr 12 to Apr 18, 2021 | 1  | 0-0 | 0.00-0.00    | 1-6 | 14.29-85.71 |
|           | Apr 19 to Apr 25, 2021 | 7  | 0-1 | 0.00-16.67   | 0-0 | 0.00-0.00   |
|           | Apr 26 to May 2, 2021  | 6  | 0-0 | 0.00-0.00    | 0-0 | 0.00-0.00   |
|           | May 3 to May 9, 2021   | 8  | 0-2 | 0.00-33.33   | 0-0 | 0.00-0.00   |
|           | May 10 to May 16, 2021 | 5  | 0-0 | 0.00-0.00    | 0-1 | 0.00-16.67  |
|           | May 17 to May 23, 2021 | 7  | 0-1 | 0.00-16.67   | 0-0 | 0.00-0.00   |
|           | May 24 to May 30, 2021 | 11 | 0-5 | 0.00-83.33   | 0-0 | 0.00-0.00   |
| Fukuoka   |                        |    |     |              |     |             |
|           | Apr 5 to Apr 11, 2021  | 21 | 0-0 | 0.00-0.00    | 0-0 | 0.00-0.00   |
|           | Apr 12 to Apr 18, 2021 | 18 | 0-0 | 0.00-0.00    | 0-3 | 0.00-14.29  |
|           | Apr 19 to Apr 25, 2021 | 21 | 0-0 | 0.00-0.00    | 0-0 | 0.00-0.00   |

|          |                        |    |     |              |     |            |
|----------|------------------------|----|-----|--------------|-----|------------|
|          | Apr 26 to May 2, 2021  | 25 | 0-4 | 0.00-19.05   | 0-0 | 0.00-0.00  |
|          | May 3 to May 9, 2021   | 27 | 0-7 | 0.00-35.00   | 0-0 | 0.00-0.00  |
|          | May 10 to May 16, 2021 | 20 | 0-0 | 0.00-0.00    | 0-0 | 0.00-0.00  |
|          | May 17 to May 23, 2021 | 20 | 0-1 | 0.00-5.26    | 0-0 | 0.00-0.00  |
|          | May 24 to May 30, 2021 | 17 | 0-0 | 0.00-0.00    | 0-2 | 0.00-10.53 |
| Saga     |                        |    |     |              |     |            |
|          | Apr 5 to Apr 11, 2021  | 4  | 0-0 | 0.00-0.00    | 0-2 | 0.00-33.33 |
|          | Apr 12 to Apr 18, 2021 | 4  | 0-0 | 0.00-0.00    | 0-2 | 0.00-33.33 |
|          | Apr 19 to Apr 25, 2021 | 2  | 0-0 | 0.00-0.00    | 0-4 | 0.00-66.67 |
|          | Apr 26 to May 2, 2021  | 2  | 0-0 | 0.00-0.00    | 0-3 | 0.00-60.00 |
|          | May 3 to May 9, 2021   | 7  | 0-2 | 0.00-40.00   | 0-0 | 0.00-0.00  |
|          | May 10 to May 16, 2021 | 3  | 0-0 | 0.00-0.00    | 0-2 | 0.00-40.00 |
|          | May 17 to May 23, 2021 | 5  | 0-1 | 0.00-25.00   | 0-0 | 0.00-0.00  |
|          | May 24 to May 30, 2021 | 3  | 0-0 | 0.00-0.00    | 0-2 | 0.00-40.00 |
| Nagasaki |                        |    |     |              |     |            |
|          | Apr 5 to Apr 11, 2021  | 9  | 0-0 | 0.00-0.00    | 0-0 | 0.00-0.00  |
|          | Apr 12 to Apr 18, 2021 | 11 | 0-2 | 0.00-22.22   | 0-0 | 0.00-0.00  |
|          | Apr 19 to Apr 25, 2021 | 12 | 0-4 | 0.00-50.00   | 0-0 | 0.00-0.00  |
|          | Apr 26 to May 2, 2021  | 8  | 0-0 | 0.00-0.00    | 0-0 | 0.00-0.00  |
|          | May 3 to May 9, 2021   | 13 | 0-5 | 0.00-62.50   | 0-0 | 0.00-0.00  |
|          | May 10 to May 16, 2021 | 10 | 0-2 | 0.00-25.00   | 0-0 | 0.00-0.00  |
|          | May 17 to May 23, 2021 | 10 | 0-2 | 0.00-25.00   | 0-0 | 0.00-0.00  |
|          | May 24 to May 30, 2021 | 12 | 0-5 | 0.00-71.43   | 0-0 | 0.00-0.00  |
| Kumamoto |                        |    |     |              |     |            |
|          | Apr 5 to Apr 11, 2021  | 13 | 0-0 | 0.00-0.00    | 0-1 | 0.00-7.14  |
|          | Apr 12 to Apr 18, 2021 | 19 | 0-6 | 0.00-46.15   | 0-0 | 0.00-0.00  |
|          | Apr 19 to Apr 25, 2021 | 10 | 0-0 | 0.00-0.00    | 0-2 | 0.00-16.67 |
|          | Apr 26 to May 2, 2021  | 17 | 0-5 | 0.00-41.67   | 0-0 | 0.00-0.00  |
|          | May 3 to May 9, 2021   | 19 | 1-8 | 9.09-72.73   | 0-0 | 0.00-0.00  |
|          | May 10 to May 16, 2021 | 14 | 0-3 | 0.00-27.27   | 0-0 | 0.00-0.00  |
|          | May 17 to May 23, 2021 | 14 | 0-4 | 0.00-40.00   | 0-0 | 0.00-0.00  |
|          | May 24 to May 30, 2021 | 13 | 0-3 | 0.00-30.00   | 0-0 | 0.00-0.00  |
| Oita     |                        |    |     |              |     |            |
|          | Apr 5 to Apr 11, 2021  | 11 | 0-2 | 0.00-22.22   | 0-0 | 0.00-0.00  |
|          | Apr 12 to Apr 18, 2021 | 7  | 0-0 | 0.00-0.00    | 0-1 | 0.00-12.50 |
|          | Apr 19 to Apr 25, 2021 | 11 | 0-3 | 0.00-37.50   | 0-0 | 0.00-0.00  |
|          | Apr 26 to May 2, 2021  | 11 | 0-3 | 0.00-37.50   | 0-0 | 0.00-0.00  |
|          | May 3 to May 9, 2021   | 15 | 2-8 | 28.57-114.29 | 0-0 | 0.00-0.00  |
|          | May 10 to May 16, 2021 | 10 | 0-3 | 0.00-42.86   | 0-0 | 0.00-0.00  |
|          | May 17 to May 23, 2021 | 9  | 0-2 | 0.00-28.57   | 0-0 | 0.00-0.00  |
|          | May 24 to May 30, 2021 | 8  | 0-1 | 0.00-14.29   | 0-0 | 0.00-0.00  |
| Miyazaki |                        |    |     |              |     |            |
|          | Apr 5 to Apr 11, 2021  | 5  | 0-0 | 0.00-0.00    | 0-5 | 0.00-50.00 |
|          | Apr 12 to Apr 18, 2021 | 9  | 0-0 | 0.00-0.00    | 0-1 | 0.00-10.00 |
|          | Apr 19 to Apr 25, 2021 | 9  | 0-0 | 0.00-0.00    | 0-1 | 0.00-10.00 |
|          | Apr 26 to May 2, 2021  | 5  | 0-0 | 0.00-0.00    | 0-5 | 0.00-50.00 |

|           |                        |    |     |            |     |            |
|-----------|------------------------|----|-----|------------|-----|------------|
|           | May 3 to May 9, 2021   | 8  | 0-0 | 0.00-0.00  | 0-1 | 0.00-11.11 |
|           | May 10 to May 16, 2021 | 10 | 0-1 | 0.00-11.11 | 0-0 | 0.00-0.00  |
|           | May 17 to May 23, 2021 | 8  | 0-0 | 0.00-0.00  | 0-0 | 0.00-0.00  |
|           | May 24 to May 30, 2021 | 8  | 0-0 | 0.00-0.00  | 0-0 | 0.00-0.00  |
| Kagoshima |                        |    |     |            |     |            |
|           | Apr 5 to Apr 11, 2021  | 11 | 0-0 | 0.00-0.00  | 0-1 | 0.00-8.33  |
|           | Apr 12 to Apr 18, 2021 | 13 | 0-2 | 0.00-18.18 | 0-0 | 0.00-0.00  |
|           | Apr 19 to Apr 25, 2021 | 11 | 0-0 | 0.00-0.00  | 0-0 | 0.00-0.00  |
|           | Apr 26 to May 2, 2021  | 12 | 0-2 | 0.00-20.00 | 0-0 | 0.00-0.00  |
|           | May 3 to May 9, 2021   | 13 | 0-3 | 0.00-30.00 | 0-0 | 0.00-0.00  |
|           | May 10 to May 16, 2021 | 14 | 0-4 | 0.00-40.00 | 0-0 | 0.00-0.00  |
|           | May 17 to May 23, 2021 | 15 | 0-6 | 0.00-66.67 | 0-0 | 0.00-0.00  |
|           | May 24 to May 30, 2021 | 15 | 0-6 | 0.00-66.67 | 0-0 | 0.00-0.00  |
| Okinawa   |                        |    |     |            |     |            |
|           | Apr 5 to Apr 11, 2021  | 17 | 0-6 | 0.00-54.55 | 0-0 | 0.00-0.00  |
|           | Apr 12 to Apr 18, 2021 | 12 | 0-1 | 0.00-9.09  | 0-0 | 0.00-0.00  |
|           | Apr 19 to Apr 25, 2021 | 7  | 0-0 | 0.00-0.00  | 0-4 | 0.00-36.36 |
|           | Apr 26 to May 2, 2021  | 8  | 0-0 | 0.00-0.00  | 0-2 | 0.00-20.00 |
|           | May 3 to May 9, 2021   | 9  | 0-0 | 0.00-0.00  | 0-1 | 0.00-10.00 |
|           | May 10 to May 16, 2021 | 17 | 0-6 | 0.00-54.55 | 0-0 | 0.00-0.00  |
|           | May 17 to May 23, 2021 | 13 | 0-2 | 0.00-18.18 | 0-0 | 0.00-0.00  |
|           | May 24 to May 30, 2021 | 14 | 0-3 | 0.00-27.27 | 0-0 | 0.00-0.00  |

---

**Table A.13: Weekly number of observed and excess/exiguous deaths in Japan and 47 prefectures for malignant neoplasms-related deaths in all places from January 2020 through May 2021.**

| Prefecture | Week                   | Observed | Excess deaths | Percent excess | Exiguous deaths | Percent exiguous |
|------------|------------------------|----------|---------------|----------------|-----------------|------------------|
| Japan      |                        |          |               |                |                 |                  |
|            | Apr 5 to Apr 11, 2021  | 7221     | 0–21          | 0.00–0.29      | 0–0             | 0.00–0.00        |
|            | Apr 12 to Apr 18, 2021 | 7439     | 46–252        | 0.64–3.51      | 0–0             | 0.00–0.00        |
|            | Apr 19 to Apr 25, 2021 | 7439     | 59–264        | 0.82–3.68      | 0–0             | 0.00–0.00        |
|            | Apr 26 to May 2, 2021  | 7620     | 265–471       | 3.71–6.59      | 0–0             | 0.00–0.00        |
|            | May 3 to May 9, 2021   | 7474     | 145–344       | 2.03–4.82      | 0–0             | 0.00–0.00        |
|            | May 10 to May 16, 2021 | 7357     | 56–249        | 0.79–3.50      | 0–0             | 0.00–0.00        |
|            | May 17 to May 23, 2021 | 7274     | 0–172         | 0.00–2.42      | 0–0             | 0.00–0.00        |
|            | May 24 to May 30, 2021 | 7308     | 0–187         | 0.00–2.63      | 0–0             | 0.00–0.00        |
| Hokkaido   |                        |          |               |                |                 |                  |
|            | Apr 5 to Apr 11, 2021  | 357      | 0–0           | 0.00–0.00      | 0–21            | 0.00–5.56        |
|            | Apr 12 to Apr 18, 2021 | 405      | 0–30          | 0.00–8.00      | 0–0             | 0.00–0.00        |
|            | Apr 19 to Apr 25, 2021 | 373      | 0–0           | 0.00–0.00      | 0–2             | 0.00–0.53        |
|            | Apr 26 to May 2, 2021  | 398      | 0–25          | 0.00–6.70      | 0–0             | 0.00–0.00        |
|            | May 3 to May 9, 2021   | 387      | 0–15          | 0.00–4.03      | 0–0             | 0.00–0.00        |
|            | May 10 to May 16, 2021 | 387      | 0–14          | 0.00–3.75      | 0–0             | 0.00–0.00        |
|            | May 17 to May 23, 2021 | 416      | 5–43          | 1.34–11.53     | 0–0             | 0.00–0.00        |
|            | May 24 to May 30, 2021 | 389      | 0–14          | 0.00–3.73      | 0–0             | 0.00–0.00        |
| Aomori     |                        |          |               |                |                 |                  |
|            | Apr 5 to Apr 11, 2021  | 112      | 0–17          | 0.00–17.89     | 0–0             | 0.00–0.00        |
|            | Apr 12 to Apr 18, 2021 | 108      | 0–11          | 0.00–11.34     | 0–0             | 0.00–0.00        |
|            | Apr 19 to Apr 25, 2021 | 104      | 0–6           | 0.00–6.12      | 0–0             | 0.00–0.00        |
|            | Apr 26 to May 2, 2021  | 107      | 0–8           | 0.00–8.08      | 0–0             | 0.00–0.00        |
|            | May 3 to May 9, 2021   | 96       | 0–0           | 0.00–0.00      | 0–1             | 0.00–1.03        |
|            | May 10 to May 16, 2021 | 99       | 0–3           | 0.00–3.13      | 0–0             | 0.00–0.00        |
|            | May 17 to May 23, 2021 | 111      | 0–14          | 0.00–14.43     | 0–0             | 0.00–0.00        |
|            | May 24 to May 30, 2021 | 81       | 0–0           | 0.00–0.00      | 0–18            | 0.00–18.18       |
| Iwate      |                        |          |               |                |                 |                  |
|            | Apr 5 to Apr 11, 2021  | 95       | 0–8           | 0.00–9.20      | 0–0             | 0.00–0.00        |
|            | Apr 12 to Apr 18, 2021 | 75       | 0–0           | 0.00–0.00      | 0–11            | 0.00–12.79       |
|            | Apr 19 to Apr 25, 2021 | 98       | 0–12          | 0.00–13.95     | 0–0             | 0.00–0.00        |
|            | Apr 26 to May 2, 2021  | 103      | 0–17          | 0.00–19.77     | 0–0             | 0.00–0.00        |
|            | May 3 to May 9, 2021   | 86       | 0–0           | 0.00–0.00      | 0–0             | 0.00–0.00        |
|            | May 10 to May 16, 2021 | 87       | 0–0           | 0.00–0.00      | 0–0             | 0.00–0.00        |
|            | May 17 to May 23, 2021 | 85       | 0–0           | 0.00–0.00      | 0–2             | 0.00–2.30        |
|            | May 24 to May 30, 2021 | 89       | 0–3           | 0.00–3.49      | 0–0             | 0.00–0.00        |
| Miyagi     |                        |          |               |                |                 |                  |
|            | Apr 5 to Apr 11, 2021  | 130      | 0–0           | 0.00–0.00      | 0–1             | 0.00–0.76        |
|            | Apr 12 to Apr 18, 2021 | 150      | 0–18          | 0.00–13.64     | 0–0             | 0.00–0.00        |
|            | Apr 19 to Apr 25, 2021 | 130      | 0–0           | 0.00–0.00      | 0–0             | 0.00–0.00        |
|            | Apr 26 to May 2, 2021  | 150      | 0–19          | 0.00–14.50     | 0–0             | 0.00–0.00        |
|            | May 3 to May 9, 2021   | 126      | 0–0           | 0.00–0.00      | 0–5             | 0.00–3.82        |

|           |                        |     |      |            |      |            |
|-----------|------------------------|-----|------|------------|------|------------|
|           | May 10 to May 16, 2021 | 126 | 0-0  | 0.00-0.00  | 0-4  | 0.00-3.08  |
|           | May 17 to May 23, 2021 | 117 | 0-0  | 0.00-0.00  | 0-14 | 0.00-10.69 |
|           | May 24 to May 30, 2021 | 140 | 0-10 | 0.00-7.69  | 0-0  | 0.00-0.00  |
| Akita     |                        |     |      |            |      |            |
|           | Apr 5 to Apr 11, 2021  | 78  | 0-0  | 0.00-0.00  | 0-0  | 0.00-0.00  |
|           | Apr 12 to Apr 18, 2021 | 76  | 0-0  | 0.00-0.00  | 0-2  | 0.00-2.56  |
|           | Apr 19 to Apr 25, 2021 | 76  | 0-0  | 0.00-0.00  | 0-1  | 0.00-1.30  |
|           | Apr 26 to May 2, 2021  | 84  | 0-7  | 0.00-9.09  | 0-0  | 0.00-0.00  |
|           | May 3 to May 9, 2021   | 84  | 0-8  | 0.00-10.53 | 0-0  | 0.00-0.00  |
|           | May 10 to May 16, 2021 | 70  | 0-0  | 0.00-0.00  | 0-6  | 0.00-7.89  |
|           | May 17 to May 23, 2021 | 96  | 2-21 | 2.67-28.00 | 0-0  | 0.00-0.00  |
|           | May 24 to May 30, 2021 | 83  | 0-8  | 0.00-10.67 | 0-0  | 0.00-0.00  |
| Yamagata  |                        |     |      |            |      |            |
|           | Apr 5 to Apr 11, 2021  | 67  | 0-0  | 0.00-0.00  | 0-5  | 0.00-6.94  |
|           | Apr 12 to Apr 18, 2021 | 72  | 0-0  | 0.00-0.00  | 0-0  | 0.00-0.00  |
|           | Apr 19 to Apr 25, 2021 | 77  | 0-5  | 0.00-6.94  | 0-0  | 0.00-0.00  |
|           | Apr 26 to May 2, 2021  | 77  | 0-6  | 0.00-8.45  | 0-0  | 0.00-0.00  |
|           | May 3 to May 9, 2021   | 84  | 0-13 | 0.00-18.31 | 0-0  | 0.00-0.00  |
|           | May 10 to May 16, 2021 | 91  | 2-19 | 2.78-26.39 | 0-0  | 0.00-0.00  |
|           | May 17 to May 23, 2021 | 92  | 4-21 | 5.63-29.58 | 0-0  | 0.00-0.00  |
|           | May 24 to May 30, 2021 | 74  | 0-3  | 0.00-4.23  | 0-0  | 0.00-0.00  |
| Fukushima |                        |     |      |            |      |            |
|           | Apr 5 to Apr 11, 2021  | 107 | 0-0  | 0.00-0.00  | 0-13 | 0.00-10.83 |
|           | Apr 12 to Apr 18, 2021 | 138 | 0-18 | 0.00-15.00 | 0-0  | 0.00-0.00  |
|           | Apr 19 to Apr 25, 2021 | 106 | 0-0  | 0.00-0.00  | 0-11 | 0.00-9.40  |
|           | Apr 26 to May 2, 2021  | 124 | 0-7  | 0.00-5.98  | 0-0  | 0.00-0.00  |
|           | May 3 to May 9, 2021   | 132 | 0-16 | 0.00-13.79 | 0-0  | 0.00-0.00  |
|           | May 10 to May 16, 2021 | 110 | 0-0  | 0.00-0.00  | 0-5  | 0.00-4.35  |
|           | May 17 to May 23, 2021 | 123 | 0-10 | 0.00-8.85  | 0-0  | 0.00-0.00  |
|           | May 24 to May 30, 2021 | 114 | 0-0  | 0.00-0.00  | 0-1  | 0.00-0.87  |
| Ibaraki   |                        |     |      |            |      |            |
|           | Apr 5 to Apr 11, 2021  | 159 | 0-0  | 0.00-0.00  | 0-9  | 0.00-5.36  |
|           | Apr 12 to Apr 18, 2021 | 175 | 0-9  | 0.00-5.42  | 0-0  | 0.00-0.00  |
|           | Apr 19 to Apr 25, 2021 | 157 | 0-0  | 0.00-0.00  | 0-10 | 0.00-5.99  |
|           | Apr 26 to May 2, 2021  | 185 | 0-17 | 0.00-10.12 | 0-0  | 0.00-0.00  |
|           | May 3 to May 9, 2021   | 187 | 0-18 | 0.00-10.65 | 0-0  | 0.00-0.00  |
|           | May 10 to May 16, 2021 | 186 | 0-18 | 0.00-10.71 | 0-0  | 0.00-0.00  |
|           | May 17 to May 23, 2021 | 152 | 0-0  | 0.00-0.00  | 0-15 | 0.00-8.98  |
|           | May 24 to May 30, 2021 | 160 | 0-0  | 0.00-0.00  | 0-6  | 0.00-3.61  |
| Tochigi   |                        |     |      |            |      |            |
|           | Apr 5 to Apr 11, 2021  | 110 | 0-0  | 0.00-0.00  | 0-0  | 0.00-0.00  |
|           | Apr 12 to Apr 18, 2021 | 108 | 0-0  | 0.00-0.00  | 0-1  | 0.00-0.92  |
|           | Apr 19 to Apr 25, 2021 | 114 | 0-6  | 0.00-5.56  | 0-0  | 0.00-0.00  |
|           | Apr 26 to May 2, 2021  | 110 | 0-3  | 0.00-2.80  | 0-0  | 0.00-0.00  |
|           | May 3 to May 9, 2021   | 127 | 0-19 | 0.00-17.59 | 0-0  | 0.00-0.00  |
|           | May 10 to May 16, 2021 | 91  | 0-0  | 0.00-0.00  | 0-16 | 0.00-14.95 |

|          |                        |     |       |            |      |            |
|----------|------------------------|-----|-------|------------|------|------------|
|          | May 17 to May 23, 2021 | 93  | 0-0   | 0.00-0.00  | 0-14 | 0.00-13.08 |
|          | May 24 to May 30, 2021 | 129 | 1-22  | 0.93-20.56 | 0-0  | 0.00-0.00  |
| Gunma    |                        |     |       |            |      |            |
|          | Apr 5 to Apr 11, 2021  | 122 | 0-8   | 0.00-7.02  | 0-0  | 0.00-0.00  |
|          | Apr 12 to Apr 18, 2021 | 121 | 0-6   | 0.00-5.22  | 0-0  | 0.00-0.00  |
|          | Apr 19 to Apr 25, 2021 | 102 | 0-0   | 0.00-0.00  | 0-15 | 0.00-12.82 |
|          | Apr 26 to May 2, 2021  | 116 | 0-0   | 0.00-0.00  | 0-0  | 0.00-0.00  |
|          | May 3 to May 9, 2021   | 109 | 0-0   | 0.00-0.00  | 0-7  | 0.00-6.03  |
|          | May 10 to May 16, 2021 | 109 | 0-0   | 0.00-0.00  | 0-8  | 0.00-6.84  |
|          | May 17 to May 23, 2021 | 97  | 0-0   | 0.00-0.00  | 0-18 | 0.00-15.65 |
|          | May 24 to May 30, 2021 | 114 | 0-0   | 0.00-0.00  | 0-1  | 0.00-0.87  |
| Saitama  |                        |     |       |            |      |            |
|          | Apr 5 to Apr 11, 2021  | 404 | 0-13  | 0.00-3.32  | 0-0  | 0.00-0.00  |
|          | Apr 12 to Apr 18, 2021 | 394 | 0-6   | 0.00-1.55  | 0-0  | 0.00-0.00  |
|          | Apr 19 to Apr 25, 2021 | 369 | 0-0   | 0.00-0.00  | 0-18 | 0.00-4.65  |
|          | Apr 26 to May 2, 2021  | 400 | 0-12  | 0.00-3.09  | 0-0  | 0.00-0.00  |
|          | May 3 to May 9, 2021   | 411 | 0-24  | 0.00-6.20  | 0-0  | 0.00-0.00  |
|          | May 10 to May 16, 2021 | 404 | 0-20  | 0.00-5.21  | 0-0  | 0.00-0.00  |
|          | May 17 to May 23, 2021 | 408 | 0-23  | 0.00-5.97  | 0-0  | 0.00-0.00  |
|          | May 24 to May 30, 2021 | 398 | 0-14  | 0.00-3.65  | 0-0  | 0.00-0.00  |
| Chiba    |                        |     |       |            |      |            |
|          | Apr 5 to Apr 11, 2021  | 364 | 0-24  | 0.00-7.06  | 0-0  | 0.00-0.00  |
|          | Apr 12 to Apr 18, 2021 | 381 | 6-43  | 1.78-12.72 | 0-0  | 0.00-0.00  |
|          | Apr 19 to Apr 25, 2021 | 322 | 0-0   | 0.00-0.00  | 0-15 | 0.00-4.45  |
|          | Apr 26 to May 2, 2021  | 325 | 0-0   | 0.00-0.00  | 0-10 | 0.00-2.99  |
|          | May 3 to May 9, 2021   | 358 | 0-24  | 0.00-7.19  | 0-0  | 0.00-0.00  |
|          | May 10 to May 16, 2021 | 303 | 0-0   | 0.00-0.00  | 0-25 | 0.00-7.62  |
|          | May 17 to May 23, 2021 | 306 | 0-0   | 0.00-0.00  | 0-20 | 0.00-6.13  |
|          | May 24 to May 30, 2021 | 333 | 0-5   | 0.00-1.52  | 0-0  | 0.00-0.00  |
| Tokyo    |                        |     |       |            |      |            |
|          | Apr 5 to Apr 11, 2021  | 622 | 0-0   | 0.00-0.00  | 0-27 | 0.00-4.16  |
|          | Apr 12 to Apr 18, 2021 | 676 | 0-31  | 0.00-4.81  | 0-0  | 0.00-0.00  |
|          | Apr 19 to Apr 25, 2021 | 702 | 9-60  | 1.40-9.35  | 0-0  | 0.00-0.00  |
|          | Apr 26 to May 2, 2021  | 719 | 25-78 | 3.90-12.17 | 0-0  | 0.00-0.00  |
|          | May 3 to May 9, 2021   | 661 | 0-20  | 0.00-3.12  | 0-0  | 0.00-0.00  |
|          | May 10 to May 16, 2021 | 632 | 0-0   | 0.00-0.00  | 0-7  | 0.00-1.10  |
|          | May 17 to May 23, 2021 | 628 | 0-0   | 0.00-0.00  | 0-11 | 0.00-1.72  |
|          | May 24 to May 30, 2021 | 648 | 0-7   | 0.00-1.09  | 0-0  | 0.00-0.00  |
| Kanagawa |                        |     |       |            |      |            |
|          | Apr 5 to Apr 11, 2021  | 462 | 0-0   | 0.00-0.00  | 0-1  | 0.00-0.22  |
|          | Apr 12 to Apr 18, 2021 | 466 | 0-3   | 0.00-0.65  | 0-0  | 0.00-0.00  |
|          | Apr 19 to Apr 25, 2021 | 494 | 0-28  | 0.00-6.01  | 0-0  | 0.00-0.00  |
|          | Apr 26 to May 2, 2021  | 510 | 0-44  | 0.00-9.44  | 0-0  | 0.00-0.00  |
|          | May 3 to May 9, 2021   | 491 | 0-28  | 0.00-6.05  | 0-0  | 0.00-0.00  |
|          | May 10 to May 16, 2021 | 481 | 0-18  | 0.00-3.89  | 0-0  | 0.00-0.00  |
|          | May 17 to May 23, 2021 | 464 | 0-3   | 0.00-0.65  | 0-0  | 0.00-0.00  |

|                        |                        |     |            |            |           |            |
|------------------------|------------------------|-----|------------|------------|-----------|------------|
| Niigata                | May 24 to May 30, 2021 | 483 | 0-22       | 0.00-4.77  | 0-0       | 0.00-0.00  |
|                        | Apr 5 to Apr 11, 2021  | 137 | 0-0        | 0.00-0.00  | 0-11      | 0.00-7.43  |
|                        | Apr 12 to Apr 18, 2021 | 143 | 0-0        | 0.00-0.00  | 0-6       | 0.00-4.03  |
|                        | Apr 19 to Apr 25, 2021 | 153 | 0-3        | 0.00-2.00  | 0-0       | 0.00-0.00  |
|                        | Apr 26 to May 2, 2021  | 147 | 0-0        | 0.00-0.00  | 0-3       | 0.00-2.00  |
|                        | May 3 to May 9, 2021   | 119 | 0-0        | 0.00-0.00  | 6-29      | 4.05-19.59 |
|                        | May 10 to May 16, 2021 | 140 | 0-0        | 0.00-0.00  | 0-8       | 0.00-5.41  |
|                        | May 17 to May 23, 2021 | 127 | 0-0        | 0.00-0.00  | 0-21      | 0.00-14.19 |
| Toyama                 | May 24 to May 30, 2021 | 152 | 0-3        | 0.00-2.01  | 0-0       | 0.00-0.00  |
|                        | Apr 5 to Apr 11, 2021  | 75  | 0-9        | 0.00-13.64 | 0-0       | 0.00-0.00  |
|                        | Apr 12 to Apr 18, 2021 | 70  | 0-4        | 0.00-6.06  | 0-0       | 0.00-0.00  |
|                        | Apr 19 to Apr 25, 2021 | 72  | 0-7        | 0.00-10.77 | 0-0       | 0.00-0.00  |
|                        | Apr 26 to May 2, 2021  | 77  | 0-11       | 0.00-16.67 | 0-0       | 0.00-0.00  |
|                        | May 3 to May 9, 2021   | 75  | 0-10       | 0.00-15.38 | 0-0       | 0.00-0.00  |
|                        | May 10 to May 16, 2021 | 71  | 0-5        | 0.00-7.58  | 0-0       | 0.00-0.00  |
|                        | May 17 to May 23, 2021 | 53  | 0-0        | 0.00-0.00  | 0-13      | 0.00-19.70 |
| Ishikawa               | May 24 to May 30, 2021 | 68  | 0-1        | 0.00-1.49  | 0-0       | 0.00-0.00  |
|                        | Apr 5 to Apr 11, 2021  | 78  | 0-11       | 0.00-16.42 | 0-0       | 0.00-0.00  |
|                        | Apr 12 to Apr 18, 2021 | 74  | 0-7        | 0.00-10.45 | 0-0       | 0.00-0.00  |
|                        | Apr 19 to Apr 25, 2021 | 76  | 0-9        | 0.00-13.43 | 0-0       | 0.00-0.00  |
|                        | Apr 26 to May 2, 2021  | 70  | 0-4        | 0.00-6.06  | 0-0       | 0.00-0.00  |
|                        | May 3 to May 9, 2021   | 74  | 0-7        | 0.00-10.45 | 0-0       | 0.00-0.00  |
|                        | May 10 to May 16, 2021 | 65  | 0-0        | 0.00-0.00  | 0-2       | 0.00-2.99  |
|                        | May 17 to May 23, 2021 | 69  | 0-2        | 0.00-2.99  | 0-0       | 0.00-0.00  |
| Fukui                  | May 24 to May 30, 2021 | 56  | 0-0        | 0.00-0.00  | 0-11      | 0.00-16.42 |
|                        | Apr 5 to Apr 11, 2021  | 41  | 0-0        | 0.00-0.00  | 0-2       | 0.00-4.65  |
|                        | Apr 12 to Apr 18, 2021 | 51  | 0-7        | 0.00-15.91 | 0-0       | 0.00-0.00  |
|                        | Apr 19 to Apr 25, 2021 | 45  | 0-2        | 0.00-4.65  | 0-0       | 0.00-0.00  |
|                        | Apr 26 to May 2, 2021  | 50  | 0-7        | 0.00-16.28 | 0-0       | 0.00-0.00  |
|                        | May 3 to May 9, 2021   | 54  | 0-12       | 0.00-28.57 | 0-0       | 0.00-0.00  |
|                        | May 10 to May 16, 2021 | 46  | 0-4        | 0.00-9.52  | 0-0       | 0.00-0.00  |
|                        | May 17 to May 23, 2021 | 46  | 0-3        | 0.00-6.98  | 0-0       | 0.00-0.00  |
| Yamanashi              | May 24 to May 30, 2021 | 46  | 0-4        | 0.00-9.52  | 0-0       | 0.00-0.00  |
|                        | Apr 5 to Apr 11, 2021  | 42  | 0-0        | 0.00-0.00  | 0-7       | 0.00-14.29 |
|                        | Apr 12 to Apr 18, 2021 | 39  | 0-0        | 0.00-0.00  | 0-10      | 0.00-20.41 |
|                        | Apr 19 to Apr 25, 2021 | 44  | 0-0        | 0.00-0.00  | 0-4       | 0.00-8.33  |
|                        | Apr 26 to May 2, 2021  | 46  | 0-0        | 0.00-0.00  | 0-3       | 0.00-6.12  |
|                        | May 3 to May 9, 2021   | 61  | 0-13       | 0.00-27.08 | 0-0       | 0.00-0.00  |
|                        | May 10 to May 16, 2021 | 59  | 0-11       | 0.00-22.92 | 0-0       | 0.00-0.00  |
|                        | May 17 to May 23, 2021 | 65  | 2-16       | 4.08-32.65 | 0-0       | 0.00-0.00  |
| May 24 to May 30, 2021 | 56                     | 0-8 | 0.00-16.67 | 0-0        | 0.00-0.00 |            |



Nagano

|                        |     |     |           |      |            |
|------------------------|-----|-----|-----------|------|------------|
| Apr 5 to Apr 11, 2021  | 108 | 0-0 | 0.00-0.00 | 0-13 | 0.00-10.74 |
| Apr 12 to Apr 18, 2021 | 123 | 0-2 | 0.00-1.65 | 0-0  | 0.00-0.00  |
| Apr 19 to Apr 25, 2021 | 113 | 0-0 | 0.00-0.00 | 0-6  | 0.00-5.04  |
| Apr 26 to May 2, 2021  | 120 | 0-3 | 0.00-2.56 | 0-0  | 0.00-0.00  |
| May 3 to May 9, 2021   | 107 | 0-0 | 0.00-0.00 | 0-11 | 0.00-9.32  |
| May 10 to May 16, 2021 | 123 | 0-4 | 0.00-3.36 | 0-0  | 0.00-0.00  |
| May 17 to May 23, 2021 | 123 | 0-6 | 0.00-5.13 | 0-0  | 0.00-0.00  |
| May 24 to May 30, 2021 | 101 | 0-0 | 0.00-0.00 | 0-18 | 0.00-15.13 |

Gifu

|                        |     |      |            |     |           |
|------------------------|-----|------|------------|-----|-----------|
| Apr 5 to Apr 11, 2021  | 123 | 0-6  | 0.00-5.13  | 0-0 | 0.00-0.00 |
| Apr 12 to Apr 18, 2021 | 130 | 0-15 | 0.00-13.04 | 0-0 | 0.00-0.00 |
| Apr 19 to Apr 25, 2021 | 133 | 0-19 | 0.00-16.67 | 0-0 | 0.00-0.00 |
| Apr 26 to May 2, 2021  | 105 | 0-0  | 0.00-0.00  | 0-8 | 0.00-7.08 |
| May 3 to May 9, 2021   | 139 | 3-24 | 2.61-20.87 | 0-0 | 0.00-0.00 |
| May 10 to May 16, 2021 | 126 | 0-12 | 0.00-10.53 | 0-0 | 0.00-0.00 |
| May 17 to May 23, 2021 | 136 | 0-21 | 0.00-18.26 | 0-0 | 0.00-0.00 |
| May 24 to May 30, 2021 | 116 | 0-0  | 0.00-0.00  | 0-0 | 0.00-0.00 |

Shizuoka

|                        |     |      |            |     |           |
|------------------------|-----|------|------------|-----|-----------|
| Apr 5 to Apr 11, 2021  | 229 | 0-19 | 0.00-9.05  | 0-0 | 0.00-0.00 |
| Apr 12 to Apr 18, 2021 | 199 | 0-0  | 0.00-0.00  | 0-9 | 0.00-4.33 |
| Apr 19 to Apr 25, 2021 | 204 | 0-0  | 0.00-0.00  | 0-3 | 0.00-1.45 |
| Apr 26 to May 2, 2021  | 230 | 0-22 | 0.00-10.58 | 0-0 | 0.00-0.00 |
| May 3 to May 9, 2021   | 212 | 0-6  | 0.00-2.91  | 0-0 | 0.00-0.00 |
| May 10 to May 16, 2021 | 200 | 0-0  | 0.00-0.00  | 0-6 | 0.00-2.91 |
| May 17 to May 23, 2021 | 245 | 9-38 | 4.35-18.36 | 0-0 | 0.00-0.00 |
| May 24 to May 30, 2021 | 203 | 0-0  | 0.00-0.00  | 0-3 | 0.00-1.46 |

Aichi

|                        |     |      |           |      |           |
|------------------------|-----|------|-----------|------|-----------|
| Apr 5 to Apr 11, 2021  | 356 | 0-0  | 0.00-0.00 | 0-23 | 0.00-6.07 |
| Apr 12 to Apr 18, 2021 | 369 | 0-0  | 0.00-0.00 | 0-9  | 0.00-2.38 |
| Apr 19 to Apr 25, 2021 | 363 | 0-0  | 0.00-0.00 | 0-13 | 0.00-3.46 |
| Apr 26 to May 2, 2021  | 391 | 0-13 | 0.00-3.44 | 0-0  | 0.00-0.00 |
| May 3 to May 9, 2021   | 373 | 0-0  | 0.00-0.00 | 0-8  | 0.00-2.10 |
| May 10 to May 16, 2021 | 415 | 0-37 | 0.00-9.79 | 0-0  | 0.00-0.00 |
| May 17 to May 23, 2021 | 339 | 0-0  | 0.00-0.00 | 0-35 | 0.00-9.36 |
| May 24 to May 30, 2021 | 367 | 0-0  | 0.00-0.00 | 0-5  | 0.00-1.34 |

Mie

|                        |     |      |            |     |           |
|------------------------|-----|------|------------|-----|-----------|
| Apr 5 to Apr 11, 2021  | 92  | 0-0  | 0.00-0.00  | 0-9 | 0.00-8.91 |
| Apr 12 to Apr 18, 2021 | 103 | 0-4  | 0.00-4.04  | 0-0 | 0.00-0.00 |
| Apr 19 to Apr 25, 2021 | 103 | 0-5  | 0.00-5.10  | 0-0 | 0.00-0.00 |
| Apr 26 to May 2, 2021  | 94  | 0-0  | 0.00-0.00  | 0-4 | 0.00-4.08 |
| May 3 to May 9, 2021   | 111 | 0-15 | 0.00-15.63 | 0-0 | 0.00-0.00 |
| May 10 to May 16, 2021 | 117 | 1-21 | 1.04-21.88 | 0-0 | 0.00-0.00 |
| May 17 to May 23, 2021 | 118 | 4-24 | 4.26-25.53 | 0-0 | 0.00-0.00 |
| May 24 to May 30, 2021 | 103 | 0-8  | 0.00-8.42  | 0-0 | 0.00-0.00 |

Shiga

|          |                        |     |       |            |      |            |
|----------|------------------------|-----|-------|------------|------|------------|
|          | Apr 5 to Apr 11, 2021  | 72  | 0-0   | 0.00-0.00  | 0-0  | 0.00-0.00  |
|          | Apr 12 to Apr 18, 2021 | 73  | 0-2   | 0.00-2.82  | 0-0  | 0.00-0.00  |
|          | Apr 19 to Apr 25, 2021 | 69  | 0-0   | 0.00-0.00  | 0-1  | 0.00-1.43  |
|          | Apr 26 to May 2, 2021  | 84  | 0-14  | 0.00-20.00 | 0-0  | 0.00-0.00  |
|          | May 3 to May 9, 2021   | 58  | 0-0   | 0.00-0.00  | 0-12 | 0.00-17.14 |
|          | May 10 to May 16, 2021 | 73  | 0-5   | 0.00-7.35  | 0-0  | 0.00-0.00  |
|          | May 17 to May 23, 2021 | 77  | 0-7   | 0.00-10.00 | 0-0  | 0.00-0.00  |
|          | May 24 to May 30, 2021 | 78  | 0-8   | 0.00-11.43 | 0-0  | 0.00-0.00  |
| Kyoto    |                        |     |       |            |      |            |
|          | Apr 5 to Apr 11, 2021  | 145 | 0-0   | 0.00-0.00  | 0-2  | 0.00-1.36  |
|          | Apr 12 to Apr 18, 2021 | 163 | 0-16  | 0.00-10.88 | 0-0  | 0.00-0.00  |
|          | Apr 19 to Apr 25, 2021 | 166 | 0-20  | 0.00-13.70 | 0-0  | 0.00-0.00  |
|          | Apr 26 to May 2, 2021  | 159 | 0-12  | 0.00-8.16  | 0-0  | 0.00-0.00  |
|          | May 3 to May 9, 2021   | 152 | 0-4   | 0.00-2.70  | 0-0  | 0.00-0.00  |
|          | May 10 to May 16, 2021 | 154 | 0-6   | 0.00-4.05  | 0-0  | 0.00-0.00  |
|          | May 17 to May 23, 2021 | 137 | 0-0   | 0.00-0.00  | 0-12 | 0.00-8.05  |
|          | May 24 to May 30, 2021 | 153 | 0-4   | 0.00-2.68  | 0-0  | 0.00-0.00  |
| Osaka    |                        |     |       |            |      |            |
|          | Apr 5 to Apr 11, 2021  | 554 | 0-31  | 0.00-5.93  | 0-0  | 0.00-0.00  |
|          | Apr 12 to Apr 18, 2021 | 513 | 0-0   | 0.00-0.00  | 0-6  | 0.00-1.16  |
|          | Apr 19 to Apr 25, 2021 | 562 | 0-43  | 0.00-8.29  | 0-0  | 0.00-0.00  |
|          | Apr 26 to May 2, 2021  | 565 | 2-49  | 0.39-9.50  | 0-0  | 0.00-0.00  |
|          | May 3 to May 9, 2021   | 548 | 0-32  | 0.00-6.20  | 0-0  | 0.00-0.00  |
|          | May 10 to May 16, 2021 | 507 | 0-0   | 0.00-0.00  | 0-7  | 0.00-1.36  |
|          | May 17 to May 23, 2021 | 514 | 0-1   | 0.00-0.19  | 0-0  | 0.00-0.00  |
|          | May 24 to May 30, 2021 | 492 | 0-0   | 0.00-0.00  | 0-20 | 0.00-3.91  |
| Hyogo    |                        |     |       |            |      |            |
|          | Apr 5 to Apr 11, 2021  | 319 | 0-6   | 0.00-1.92  | 0-0  | 0.00-0.00  |
|          | Apr 12 to Apr 18, 2021 | 326 | 0-17  | 0.00-5.50  | 0-0  | 0.00-0.00  |
|          | Apr 19 to Apr 25, 2021 | 318 | 0-11  | 0.00-3.58  | 0-0  | 0.00-0.00  |
|          | Apr 26 to May 2, 2021  | 368 | 30-64 | 9.87-21.05 | 0-0  | 0.00-0.00  |
|          | May 3 to May 9, 2021   | 318 | 0-15  | 0.00-4.95  | 0-0  | 0.00-0.00  |
|          | May 10 to May 16, 2021 | 314 | 0-10  | 0.00-3.29  | 0-0  | 0.00-0.00  |
|          | May 17 to May 23, 2021 | 326 | 0-21  | 0.00-6.89  | 0-0  | 0.00-0.00  |
|          | May 24 to May 30, 2021 | 321 | 0-14  | 0.00-4.56  | 0-0  | 0.00-0.00  |
| Nara     |                        |     |       |            |      |            |
|          | Apr 5 to Apr 11, 2021  | 84  | 0-4   | 0.00-5.00  | 0-0  | 0.00-0.00  |
|          | Apr 12 to Apr 18, 2021 | 82  | 0-1   | 0.00-1.23  | 0-0  | 0.00-0.00  |
|          | Apr 19 to Apr 25, 2021 | 85  | 0-5   | 0.00-6.25  | 0-0  | 0.00-0.00  |
|          | Apr 26 to May 2, 2021  | 74  | 0-0   | 0.00-0.00  | 0-8  | 0.00-9.76  |
|          | May 3 to May 9, 2021   | 91  | 0-8   | 0.00-9.64  | 0-0  | 0.00-0.00  |
|          | May 10 to May 16, 2021 | 95  | 0-12  | 0.00-14.46 | 0-0  | 0.00-0.00  |
|          | May 17 to May 23, 2021 | 72  | 0-0   | 0.00-0.00  | 0-10 | 0.00-12.20 |
|          | May 24 to May 30, 2021 | 85  | 0-2   | 0.00-2.41  | 0-0  | 0.00-0.00  |
| Wakayama |                        |     |       |            |      |            |
|          | Apr 5 to Apr 11, 2021  | 61  | 0-0   | 0.00-0.00  | 0-2  | 0.00-3.17  |

|           |                        |     |      |            |      |            |
|-----------|------------------------|-----|------|------------|------|------------|
|           | Apr 12 to Apr 18, 2021 | 63  | 0-0  | 0.00-0.00  | 0-0  | 0.00-0.00  |
|           | Apr 19 to Apr 25, 2021 | 57  | 0-0  | 0.00-0.00  | 0-6  | 0.00-9.52  |
|           | Apr 26 to May 2, 2021  | 65  | 0-2  | 0.00-3.17  | 0-0  | 0.00-0.00  |
|           | May 3 to May 9, 2021   | 77  | 0-16 | 0.00-26.23 | 0-0  | 0.00-0.00  |
|           | May 10 to May 16, 2021 | 72  | 0-10 | 0.00-16.13 | 0-0  | 0.00-0.00  |
|           | May 17 to May 23, 2021 | 71  | 0-10 | 0.00-16.39 | 0-0  | 0.00-0.00  |
|           | May 24 to May 30, 2021 | 70  | 0-8  | 0.00-12.90 | 0-0  | 0.00-0.00  |
| Tottori   |                        |     |      |            |      |            |
|           | Apr 5 to Apr 11, 2021  | 41  | 0-6  | 0.00-17.14 | 0-0  | 0.00-0.00  |
|           | Apr 12 to Apr 18, 2021 | 33  | 0-0  | 0.00-0.00  | 0-2  | 0.00-5.71  |
|           | Apr 19 to Apr 25, 2021 | 34  | 0-0  | 0.00-0.00  | 0-0  | 0.00-0.00  |
|           | Apr 26 to May 2, 2021  | 43  | 0-9  | 0.00-26.47 | 0-0  | 0.00-0.00  |
|           | May 3 to May 9, 2021   | 43  | 0-10 | 0.00-30.30 | 0-0  | 0.00-0.00  |
|           | May 10 to May 16, 2021 | 39  | 0-4  | 0.00-11.43 | 0-0  | 0.00-0.00  |
|           | May 17 to May 23, 2021 | 44  | 0-9  | 0.00-25.71 | 0-0  | 0.00-0.00  |
|           | May 24 to May 30, 2021 | 46  | 0-10 | 0.00-27.78 | 0-0  | 0.00-0.00  |
| Shimane   |                        |     |      |            |      |            |
|           | Apr 5 to Apr 11, 2021  | 38  | 0-0  | 0.00-0.00  | 0-8  | 0.00-17.39 |
|           | Apr 12 to Apr 18, 2021 | 48  | 0-3  | 0.00-6.67  | 0-0  | 0.00-0.00  |
|           | Apr 19 to Apr 25, 2021 | 47  | 0-2  | 0.00-4.44  | 0-0  | 0.00-0.00  |
|           | Apr 26 to May 2, 2021  | 53  | 0-9  | 0.00-20.45 | 0-0  | 0.00-0.00  |
|           | May 3 to May 9, 2021   | 55  | 0-11 | 0.00-25.00 | 0-0  | 0.00-0.00  |
|           | May 10 to May 16, 2021 | 44  | 0-0  | 0.00-0.00  | 0-0  | 0.00-0.00  |
|           | May 17 to May 23, 2021 | 37  | 0-0  | 0.00-0.00  | 0-7  | 0.00-15.91 |
|           | May 24 to May 30, 2021 | 53  | 0-9  | 0.00-20.45 | 0-0  | 0.00-0.00  |
| Okayama   |                        |     |      |            |      |            |
|           | Apr 5 to Apr 11, 2021  | 112 | 0-6  | 0.00-5.66  | 0-0  | 0.00-0.00  |
|           | Apr 12 to Apr 18, 2021 | 106 | 0-1  | 0.00-0.95  | 0-0  | 0.00-0.00  |
|           | Apr 19 to Apr 25, 2021 | 109 | 0-3  | 0.00-2.83  | 0-0  | 0.00-0.00  |
|           | Apr 26 to May 2, 2021  | 104 | 0-0  | 0.00-0.00  | 0-4  | 0.00-3.70  |
|           | May 3 to May 9, 2021   | 103 | 0-0  | 0.00-0.00  | 0-6  | 0.00-5.50  |
|           | May 10 to May 16, 2021 | 127 | 0-18 | 0.00-16.51 | 0-0  | 0.00-0.00  |
|           | May 17 to May 23, 2021 | 109 | 0-2  | 0.00-1.87  | 0-0  | 0.00-0.00  |
|           | May 24 to May 30, 2021 | 109 | 0-1  | 0.00-0.93  | 0-0  | 0.00-0.00  |
| Hiroshima |                        |     |      |            |      |            |
|           | Apr 5 to Apr 11, 2021  | 161 | 0-7  | 0.00-4.55  | 0-0  | 0.00-0.00  |
|           | Apr 12 to Apr 18, 2021 | 167 | 0-12 | 0.00-7.74  | 0-0  | 0.00-0.00  |
|           | Apr 19 to Apr 25, 2021 | 172 | 0-17 | 0.00-10.97 | 0-0  | 0.00-0.00  |
|           | Apr 26 to May 2, 2021  | 150 | 0-0  | 0.00-0.00  | 0-4  | 0.00-2.60  |
|           | May 3 to May 9, 2021   | 165 | 0-14 | 0.00-9.27  | 0-0  | 0.00-0.00  |
|           | May 10 to May 16, 2021 | 169 | 0-20 | 0.00-13.42 | 0-0  | 0.00-0.00  |
|           | May 17 to May 23, 2021 | 168 | 0-17 | 0.00-11.26 | 0-0  | 0.00-0.00  |
|           | May 24 to May 30, 2021 | 158 | 0-7  | 0.00-4.64  | 0-0  | 0.00-0.00  |
| Yamaguchi |                        |     |      |            |      |            |
|           | Apr 5 to Apr 11, 2021  | 71  | 0-0  | 0.00-0.00  | 2-20 | 2.20-21.98 |
|           | Apr 12 to Apr 18, 2021 | 89  | 0-0  | 0.00-0.00  | 0-2  | 0.00-2.20  |

|           |                        |     |       |            |      |            |
|-----------|------------------------|-----|-------|------------|------|------------|
|           | Apr 19 to Apr 25, 2021 | 107 | 0-16  | 0.00-17.58 | 0-0  | 0.00-0.00  |
|           | Apr 26 to May 2, 2021  | 93  | 0-1   | 0.00-1.09  | 0-0  | 0.00-0.00  |
|           | May 3 to May 9, 2021   | 96  | 0-6   | 0.00-6.67  | 0-0  | 0.00-0.00  |
|           | May 10 to May 16, 2021 | 99  | 0-10  | 0.00-11.24 | 0-0  | 0.00-0.00  |
|           | May 17 to May 23, 2021 | 90  | 0-0   | 0.00-0.00  | 0-0  | 0.00-0.00  |
|           | May 24 to May 30, 2021 | 107 | 0-18  | 0.00-20.22 | 0-0  | 0.00-0.00  |
| Tokushima |                        |     |       |            |      |            |
|           | Apr 5 to Apr 11, 2021  | 58  | 1-14  | 2.27-31.82 | 0-0  | 0.00-0.00  |
|           | Apr 12 to Apr 18, 2021 | 30  | 0-0   | 0.00-0.00  | 1-14 | 2.27-31.82 |
|           | Apr 19 to Apr 25, 2021 | 56  | 0-12  | 0.00-27.27 | 0-0  | 0.00-0.00  |
|           | Apr 26 to May 2, 2021  | 46  | 0-2   | 0.00-4.55  | 0-0  | 0.00-0.00  |
|           | May 3 to May 9, 2021   | 32  | 0-0   | 0.00-0.00  | 0-12 | 0.00-27.27 |
|           | May 10 to May 16, 2021 | 52  | 0-7   | 0.00-15.56 | 0-0  | 0.00-0.00  |
|           | May 17 to May 23, 2021 | 36  | 0-0   | 0.00-0.00  | 0-9  | 0.00-20.00 |
|           | May 24 to May 30, 2021 | 43  | 0-0   | 0.00-0.00  | 0-2  | 0.00-4.44  |
| Kagawa    |                        |     |       |            |      |            |
|           | Apr 5 to Apr 11, 2021  | 50  | 0-0   | 0.00-0.00  | 0-9  | 0.00-15.25 |
|           | Apr 12 to Apr 18, 2021 | 62  | 0-2   | 0.00-3.33  | 0-0  | 0.00-0.00  |
|           | Apr 19 to Apr 25, 2021 | 63  | 0-4   | 0.00-6.78  | 0-0  | 0.00-0.00  |
|           | Apr 26 to May 2, 2021  | 50  | 0-0   | 0.00-0.00  | 0-7  | 0.00-12.28 |
|           | May 3 to May 9, 2021   | 62  | 0-6   | 0.00-10.71 | 0-0  | 0.00-0.00  |
|           | May 10 to May 16, 2021 | 52  | 0-0   | 0.00-0.00  | 0-3  | 0.00-5.45  |
|           | May 17 to May 23, 2021 | 68  | 0-13  | 0.00-23.64 | 0-0  | 0.00-0.00  |
|           | May 24 to May 30, 2021 | 61  | 0-7   | 0.00-12.96 | 0-0  | 0.00-0.00  |
| Ehime     |                        |     |       |            |      |            |
|           | Apr 5 to Apr 11, 2021  | 90  | 0-3   | 0.00-3.45  | 0-0  | 0.00-0.00  |
|           | Apr 12 to Apr 18, 2021 | 88  | 0-1   | 0.00-1.15  | 0-0  | 0.00-0.00  |
|           | Apr 19 to Apr 25, 2021 | 93  | 0-6   | 0.00-6.90  | 0-0  | 0.00-0.00  |
|           | Apr 26 to May 2, 2021  | 97  | 0-10  | 0.00-11.49 | 0-0  | 0.00-0.00  |
|           | May 3 to May 9, 2021   | 80  | 0-0   | 0.00-0.00  | 0-7  | 0.00-8.05  |
|           | May 10 to May 16, 2021 | 84  | 0-0   | 0.00-0.00  | 0-2  | 0.00-2.33  |
|           | May 17 to May 23, 2021 | 82  | 0-0   | 0.00-0.00  | 0-4  | 0.00-4.65  |
|           | May 24 to May 30, 2021 | 101 | 0-16  | 0.00-18.82 | 0-0  | 0.00-0.00  |
| Kochi     |                        |     |       |            |      |            |
|           | Apr 5 to Apr 11, 2021  | 41  | 0-0   | 0.00-0.00  | 0-8  | 0.00-16.33 |
|           | Apr 12 to Apr 18, 2021 | 55  | 0-6   | 0.00-12.24 | 0-0  | 0.00-0.00  |
|           | Apr 19 to Apr 25, 2021 | 61  | 0-12  | 0.00-24.49 | 0-0  | 0.00-0.00  |
|           | Apr 26 to May 2, 2021  | 50  | 0-0   | 0.00-0.00  | 0-0  | 0.00-0.00  |
|           | May 3 to May 9, 2021   | 41  | 0-0   | 0.00-0.00  | 0-8  | 0.00-16.33 |
|           | May 10 to May 16, 2021 | 49  | 0-0   | 0.00-0.00  | 0-0  | 0.00-0.00  |
|           | May 17 to May 23, 2021 | 48  | 0-0   | 0.00-0.00  | 0-1  | 0.00-2.04  |
|           | May 24 to May 30, 2021 | 45  | 0-0   | 0.00-0.00  | 0-3  | 0.00-6.25  |
| Fukuoka   |                        |     |       |            |      |            |
|           | Apr 5 to Apr 11, 2021  | 279 | 0-0   | 0.00-0.00  | 0-23 | 0.00-7.62  |
|           | Apr 12 to Apr 18, 2021 | 314 | 0-13  | 0.00-4.32  | 0-0  | 0.00-0.00  |
|           | Apr 19 to Apr 25, 2021 | 347 | 14-48 | 4.68-16.05 | 0-0  | 0.00-0.00  |

|          |                        |     |       |             |      |            |
|----------|------------------------|-----|-------|-------------|------|------------|
|          | Apr 26 to May 2, 2021  | 337 | 3-37  | 1.00-12.33  | 0-0  | 0.00-0.00  |
|          | May 3 to May 9, 2021   | 302 | 0-5   | 0.00-1.68   | 0-0  | 0.00-0.00  |
|          | May 10 to May 16, 2021 | 317 | 0-22  | 0.00-7.46   | 0-0  | 0.00-0.00  |
|          | May 17 to May 23, 2021 | 314 | 0-17  | 0.00-5.72   | 0-0  | 0.00-0.00  |
|          | May 24 to May 30, 2021 | 300 | 0-4   | 0.00-1.35   | 0-0  | 0.00-0.00  |
| Saga     |                        |     |       |             |      |            |
|          | Apr 5 to Apr 11, 2021  | 47  | 0-0   | 0.00-0.00   | 0-4  | 0.00-7.84  |
|          | Apr 12 to Apr 18, 2021 | 40  | 0-0   | 0.00-0.00   | 0-11 | 0.00-21.57 |
|          | Apr 19 to Apr 25, 2021 | 59  | 0-9   | 0.00-18.00  | 0-0  | 0.00-0.00  |
|          | Apr 26 to May 2, 2021  | 45  | 0-0   | 0.00-0.00   | 0-4  | 0.00-8.16  |
|          | May 3 to May 9, 2021   | 66  | 2-16  | 4.00-32.00  | 0-0  | 0.00-0.00  |
|          | May 10 to May 16, 2021 | 54  | 0-5   | 0.00-10.20  | 0-0  | 0.00-0.00  |
|          | May 17 to May 23, 2021 | 53  | 0-2   | 0.00-3.92   | 0-0  | 0.00-0.00  |
|          | May 24 to May 30, 2021 | 57  | 0-6   | 0.00-11.76  | 0-0  | 0.00-0.00  |
| Nagasaki |                        |     |       |             |      |            |
|          | Apr 5 to Apr 11, 2021  | 87  | 0-0   | 0.00-0.00   | 0-9  | 0.00-9.38  |
|          | Apr 12 to Apr 18, 2021 | 87  | 0-0   | 0.00-0.00   | 0-9  | 0.00-9.38  |
|          | Apr 19 to Apr 25, 2021 | 88  | 0-0   | 0.00-0.00   | 0-9  | 0.00-9.28  |
|          | Apr 26 to May 2, 2021  | 97  | 0-3   | 0.00-3.19   | 0-0  | 0.00-0.00  |
|          | May 3 to May 9, 2021   | 97  | 0-2   | 0.00-2.11   | 0-0  | 0.00-0.00  |
|          | May 10 to May 16, 2021 | 102 | 0-8   | 0.00-8.51   | 0-0  | 0.00-0.00  |
|          | May 17 to May 23, 2021 | 91  | 0-0   | 0.00-0.00   | 0-2  | 0.00-2.15  |
|          | May 24 to May 30, 2021 | 110 | 0-19  | 0.00-20.88  | 0-0  | 0.00-0.00  |
| Kumamoto |                        |     |       |             |      |            |
|          | Apr 5 to Apr 11, 2021  | 109 | 0-9   | 0.00-9.00   | 0-0  | 0.00-0.00  |
|          | Apr 12 to Apr 18, 2021 | 134 | 14-34 | 14.00-34.00 | 0-0  | 0.00-0.00  |
|          | Apr 19 to Apr 25, 2021 | 113 | 0-13  | 0.00-13.00  | 0-0  | 0.00-0.00  |
|          | Apr 26 to May 2, 2021  | 113 | 0-12  | 0.00-11.88  | 0-0  | 0.00-0.00  |
|          | May 3 to May 9, 2021   | 103 | 0-2   | 0.00-1.98   | 0-0  | 0.00-0.00  |
|          | May 10 to May 16, 2021 | 108 | 0-8   | 0.00-8.00   | 0-0  | 0.00-0.00  |
|          | May 17 to May 23, 2021 | 108 | 0-7   | 0.00-6.93   | 0-0  | 0.00-0.00  |
|          | May 24 to May 30, 2021 | 102 | 0-1   | 0.00-0.99   | 0-0  | 0.00-0.00  |
| Oita     |                        |     |       |             |      |            |
|          | Apr 5 to Apr 11, 2021  | 57  | 0-0   | 0.00-0.00   | 0-12 | 0.00-17.39 |
|          | Apr 12 to Apr 18, 2021 | 84  | 0-16  | 0.00-23.53  | 0-0  | 0.00-0.00  |
|          | Apr 19 to Apr 25, 2021 | 69  | 0-2   | 0.00-2.99   | 0-0  | 0.00-0.00  |
|          | Apr 26 to May 2, 2021  | 71  | 0-3   | 0.00-4.41   | 0-0  | 0.00-0.00  |
|          | May 3 to May 9, 2021   | 80  | 0-13  | 0.00-19.40  | 0-0  | 0.00-0.00  |
|          | May 10 to May 16, 2021 | 75  | 0-7   | 0.00-10.29  | 0-0  | 0.00-0.00  |
|          | May 17 to May 23, 2021 | 67  | 0-0   | 0.00-0.00   | 0-1  | 0.00-1.47  |
|          | May 24 to May 30, 2021 | 89  | 6-22  | 8.96-32.84  | 0-0  | 0.00-0.00  |
| Miyazaki |                        |     |       |             |      |            |
|          | Apr 5 to Apr 11, 2021  | 84  | 0-16  | 0.00-23.53  | 0-0  | 0.00-0.00  |
|          | Apr 12 to Apr 18, 2021 | 62  | 0-0   | 0.00-0.00   | 0-6  | 0.00-8.82  |
|          | Apr 19 to Apr 25, 2021 | 69  | 0-1   | 0.00-1.47   | 0-0  | 0.00-0.00  |
|          | Apr 26 to May 2, 2021  | 63  | 0-0   | 0.00-0.00   | 0-5  | 0.00-7.35  |

|           |                        |     |      |            |     |            |
|-----------|------------------------|-----|------|------------|-----|------------|
|           | May 3 to May 9, 2021   | 75  | 0-6  | 0.00-8.70  | 0-0 | 0.00-0.00  |
|           | May 10 to May 16, 2021 | 74  | 0-6  | 0.00-8.82  | 0-0 | 0.00-0.00  |
|           | May 17 to May 23, 2021 | 79  | 0-10 | 0.00-14.49 | 0-0 | 0.00-0.00  |
|           | May 24 to May 30, 2021 | 62  | 0-0  | 0.00-0.00  | 0-6 | 0.00-8.82  |
| Kagoshima |                        |     |      |            |     |            |
|           | Apr 5 to Apr 11, 2021  | 108 | 0-11 | 0.00-11.34 | 0-0 | 0.00-0.00  |
|           | Apr 12 to Apr 18, 2021 | 99  | 0-2  | 0.00-2.06  | 0-0 | 0.00-0.00  |
|           | Apr 19 to Apr 25, 2021 | 89  | 0-0  | 0.00-0.00  | 0-6 | 0.00-6.32  |
|           | Apr 26 to May 2, 2021  | 90  | 0-0  | 0.00-0.00  | 0-7 | 0.00-7.22  |
|           | May 3 to May 9, 2021   | 110 | 0-12 | 0.00-12.24 | 0-0 | 0.00-0.00  |
|           | May 10 to May 16, 2021 | 95  | 0-0  | 0.00-0.00  | 0-3 | 0.00-3.06  |
|           | May 17 to May 23, 2021 | 100 | 0-3  | 0.00-3.09  | 0-0 | 0.00-0.00  |
|           | May 24 to May 30, 2021 | 97  | 0-0  | 0.00-0.00  | 0-1 | 0.00-1.02  |
| Okinawa   |                        |     |      |            |     |            |
|           | Apr 5 to Apr 11, 2021  | 83  | 2-18 | 3.08-27.69 | 0-0 | 0.00-0.00  |
|           | Apr 12 to Apr 18, 2021 | 75  | 0-9  | 0.00-13.64 | 0-0 | 0.00-0.00  |
|           | Apr 19 to Apr 25, 2021 | 76  | 0-11 | 0.00-16.92 | 0-0 | 0.00-0.00  |
|           | Apr 26 to May 2, 2021  | 65  | 0-0  | 0.00-0.00  | 0-0 | 0.00-0.00  |
|           | May 3 to May 9, 2021   | 56  | 0-0  | 0.00-0.00  | 0-9 | 0.00-13.85 |
|           | May 10 to May 16, 2021 | 64  | 0-0  | 0.00-0.00  | 0-1 | 0.00-1.54  |
|           | May 17 to May 23, 2021 | 74  | 0-9  | 0.00-13.85 | 0-0 | 0.00-0.00  |
|           | May 24 to May 30, 2021 | 66  | 0-1  | 0.00-1.54  | 0-0 | 0.00-0.00  |

---

**Table A.14: Weekly number of observed and excess/exiguous deaths in Japan and 47 prefectures for malignant neoplasms-related deaths in hospitals and clinics from January 2020 through May 2021.**

| Prefecture | Week                   | Observed | Excess deaths | Percent excess | Exiguous deaths | Percent exiguous |
|------------|------------------------|----------|---------------|----------------|-----------------|------------------|
| Japan      |                        |          |               |                |                 |                  |
|            | Apr 5 to Apr 11, 2021  | 5211     | 0–0           | 0.00–0.00      | 197–438         | 3.49–7.75        |
|            | Apr 12 to Apr 18, 2021 | 5362     | 0–0           | 0.00–0.00      | 40–281          | 0.71–4.98        |
|            | Apr 19 to Apr 25, 2021 | 5314     | 0–0           | 0.00–0.00      | 70–313          | 1.24–5.56        |
|            | Apr 26 to May 2, 2021  | 5372     | 0–0           | 0.00–0.00      | 0–226           | 0.00–4.04        |
|            | May 3 to May 9, 2021   | 5273     | 0–0           | 0.00–0.00      | 52–298          | 0.93–5.35        |
|            | May 10 to May 16, 2021 | 5264     | 0–0           | 0.00–0.00      | 29–277          | 0.52–5.00        |
|            | May 17 to May 23, 2021 | 5221     | 0–0           | 0.00–0.00      | 69–320          | 1.25–5.78        |
|            | May 24 to May 30, 2021 | 5202     | 0–0           | 0.00–0.00      | 67–323          | 1.21–5.85        |
| Hokkaido   |                        |          |               |                |                 |                  |
|            | Apr 5 to Apr 11, 2021  | 301      | 0–0           | 0.00–0.00      | 0–29            | 0.00–8.79        |
|            | Apr 12 to Apr 18, 2021 | 333      | 0–6           | 0.00–1.83      | 0–0             | 0.00–0.00        |
|            | Apr 19 to Apr 25, 2021 | 321      | 0–0           | 0.00–0.00      | 0–6             | 0.00–1.83        |
|            | Apr 26 to May 2, 2021  | 318      | 0–0           | 0.00–0.00      | 0–7             | 0.00–2.15        |
|            | May 3 to May 9, 2021   | 314      | 0–0           | 0.00–0.00      | 0–10            | 0.00–3.09        |
|            | May 10 to May 16, 2021 | 324      | 0–0           | 0.00–0.00      | 0–0             | 0.00–0.00        |
|            | May 17 to May 23, 2021 | 362      | 2–38          | 0.62–11.73     | 0–0             | 0.00–0.00        |
|            | May 24 to May 30, 2021 | 310      | 0–0           | 0.00–0.00      | 0–16            | 0.00–4.91        |
| Aomori     |                        |          |               |                |                 |                  |
|            | Apr 5 to Apr 11, 2021  | 96       | 0–14          | 0.00–17.07     | 0–0             | 0.00–0.00        |
|            | Apr 12 to Apr 18, 2021 | 97       | 0–13          | 0.00–15.48     | 0–0             | 0.00–0.00        |
|            | Apr 19 to Apr 25, 2021 | 86       | 0–2           | 0.00–2.38      | 0–0             | 0.00–0.00        |
|            | Apr 26 to May 2, 2021  | 87       | 0–2           | 0.00–2.35      | 0–0             | 0.00–0.00        |
|            | May 3 to May 9, 2021   | 79       | 0–0           | 0.00–0.00      | 0–5             | 0.00–5.95        |
|            | May 10 to May 16, 2021 | 85       | 0–3           | 0.00–3.66      | 0–0             | 0.00–0.00        |
|            | May 17 to May 23, 2021 | 88       | 0–4           | 0.00–4.76      | 0–0             | 0.00–0.00        |
|            | May 24 to May 30, 2021 | 60       | 0–0           | 0.00–0.00      | 7–24            | 8.33–28.57       |
| Iwate      |                        |          |               |                |                 |                  |
|            | Apr 5 to Apr 11, 2021  | 86       | 0–10          | 0.00–13.16     | 0–0             | 0.00–0.00        |
|            | Apr 12 to Apr 18, 2021 | 60       | 0–0           | 0.00–0.00      | 0–16            | 0.00–21.05       |
|            | Apr 19 to Apr 25, 2021 | 81       | 0–4           | 0.00–5.19      | 0–0             | 0.00–0.00        |
|            | Apr 26 to May 2, 2021  | 79       | 0–2           | 0.00–2.60      | 0–0             | 0.00–0.00        |
|            | May 3 to May 9, 2021   | 72       | 0–0           | 0.00–0.00      | 0–4             | 0.00–5.26        |
|            | May 10 to May 16, 2021 | 72       | 0–0           | 0.00–0.00      | 0–4             | 0.00–5.26        |
|            | May 17 to May 23, 2021 | 71       | 0–0           | 0.00–0.00      | 0–6             | 0.00–7.79        |
|            | May 24 to May 30, 2021 | 71       | 0–0           | 0.00–0.00      | 0–4             | 0.00–5.33        |
| Miyagi     |                        |          |               |                |                 |                  |
|            | Apr 5 to Apr 11, 2021  | 88       | 0–0           | 0.00–0.00      | 0–15            | 0.00–14.56       |
|            | Apr 12 to Apr 18, 2021 | 105      | 0–1           | 0.00–0.96      | 0–0             | 0.00–0.00        |
|            | Apr 19 to Apr 25, 2021 | 87       | 0–0           | 0.00–0.00      | 0–16            | 0.00–15.53       |
|            | Apr 26 to May 2, 2021  | 106      | 0–3           | 0.00–2.91      | 0–0             | 0.00–0.00        |
|            | May 3 to May 9, 2021   | 84       | 0–0           | 0.00–0.00      | 0–18            | 0.00–17.65       |

|           |                        |     |      |            |      |            |
|-----------|------------------------|-----|------|------------|------|------------|
|           | May 10 to May 16, 2021 | 89  | 0-0  | 0.00-0.00  | 0-12 | 0.00-11.88 |
|           | May 17 to May 23, 2021 | 86  | 0-0  | 0.00-0.00  | 0-15 | 0.00-14.85 |
|           | May 24 to May 30, 2021 | 101 | 0-1  | 0.00-1.00  | 0-0  | 0.00-0.00  |
| Akita     |                        |     |      |            |      |            |
|           | Apr 5 to Apr 11, 2021  | 65  | 0-0  | 0.00-0.00  | 0-5  | 0.00-7.14  |
|           | Apr 12 to Apr 18, 2021 | 65  | 0-0  | 0.00-0.00  | 0-6  | 0.00-8.45  |
|           | Apr 19 to Apr 25, 2021 | 63  | 0-0  | 0.00-0.00  | 0-7  | 0.00-10.00 |
|           | Apr 26 to May 2, 2021  | 76  | 0-6  | 0.00-8.57  | 0-0  | 0.00-0.00  |
|           | May 3 to May 9, 2021   | 69  | 0-0  | 0.00-0.00  | 0-1  | 0.00-1.43  |
|           | May 10 to May 16, 2021 | 63  | 0-0  | 0.00-0.00  | 0-6  | 0.00-8.70  |
|           | May 17 to May 23, 2021 | 87  | 0-19 | 0.00-27.94 | 0-0  | 0.00-0.00  |
|           | May 24 to May 30, 2021 | 72  | 0-2  | 0.00-2.86  | 0-0  | 0.00-0.00  |
| Yamagata  |                        |     |      |            |      |            |
|           | Apr 5 to Apr 11, 2021  | 50  | 0-0  | 0.00-0.00  | 0-6  | 0.00-10.71 |
|           | Apr 12 to Apr 18, 2021 | 57  | 0-1  | 0.00-1.79  | 0-0  | 0.00-0.00  |
|           | Apr 19 to Apr 25, 2021 | 54  | 0-0  | 0.00-0.00  | 0-2  | 0.00-3.57  |
|           | Apr 26 to May 2, 2021  | 43  | 0-0  | 0.00-0.00  | 0-13 | 0.00-23.21 |
|           | May 3 to May 9, 2021   | 59  | 0-3  | 0.00-5.36  | 0-0  | 0.00-0.00  |
|           | May 10 to May 16, 2021 | 60  | 0-3  | 0.00-5.26  | 0-0  | 0.00-0.00  |
|           | May 17 to May 23, 2021 | 63  | 0-7  | 0.00-12.50 | 0-0  | 0.00-0.00  |
|           | May 24 to May 30, 2021 | 51  | 0-0  | 0.00-0.00  | 0-6  | 0.00-10.53 |
| Fukushima |                        |     |      |            |      |            |
|           | Apr 5 to Apr 11, 2021  | 85  | 0-0  | 0.00-0.00  | 0-17 | 0.00-16.67 |
|           | Apr 12 to Apr 18, 2021 | 102 | 0-0  | 0.00-0.00  | 0-0  | 0.00-0.00  |
|           | Apr 19 to Apr 25, 2021 | 85  | 0-0  | 0.00-0.00  | 0-14 | 0.00-14.14 |
|           | Apr 26 to May 2, 2021  | 90  | 0-0  | 0.00-0.00  | 0-9  | 0.00-9.09  |
|           | May 3 to May 9, 2021   | 95  | 0-0  | 0.00-0.00  | 0-3  | 0.00-3.06  |
|           | May 10 to May 16, 2021 | 84  | 0-0  | 0.00-0.00  | 0-13 | 0.00-13.40 |
|           | May 17 to May 23, 2021 | 98  | 0-3  | 0.00-3.16  | 0-0  | 0.00-0.00  |
|           | May 24 to May 30, 2021 | 89  | 0-0  | 0.00-0.00  | 0-7  | 0.00-7.29  |
| Ibaraki   |                        |     |      |            |      |            |
|           | Apr 5 to Apr 11, 2021  | 120 | 0-0  | 0.00-0.00  | 0-21 | 0.00-14.89 |
|           | Apr 12 to Apr 18, 2021 | 127 | 0-0  | 0.00-0.00  | 0-12 | 0.00-8.63  |
|           | Apr 19 to Apr 25, 2021 | 117 | 0-0  | 0.00-0.00  | 0-23 | 0.00-16.43 |
|           | Apr 26 to May 2, 2021  | 147 | 0-7  | 0.00-5.00  | 0-0  | 0.00-0.00  |
|           | May 3 to May 9, 2021   | 145 | 0-4  | 0.00-2.84  | 0-0  | 0.00-0.00  |
|           | May 10 to May 16, 2021 | 141 | 0-0  | 0.00-0.00  | 0-0  | 0.00-0.00  |
|           | May 17 to May 23, 2021 | 121 | 0-0  | 0.00-0.00  | 0-19 | 0.00-13.57 |
|           | May 24 to May 30, 2021 | 123 | 0-0  | 0.00-0.00  | 0-15 | 0.00-10.87 |
| Tochigi   |                        |     |      |            |      |            |
|           | Apr 5 to Apr 11, 2021  | 83  | 0-0  | 0.00-0.00  | 0-2  | 0.00-2.35  |
|           | Apr 12 to Apr 18, 2021 | 77  | 0-0  | 0.00-0.00  | 0-7  | 0.00-8.33  |
|           | Apr 19 to Apr 25, 2021 | 87  | 0-3  | 0.00-3.57  | 0-0  | 0.00-0.00  |
|           | Apr 26 to May 2, 2021  | 68  | 0-0  | 0.00-0.00  | 0-16 | 0.00-19.05 |
|           | May 3 to May 9, 2021   | 87  | 0-3  | 0.00-3.57  | 0-0  | 0.00-0.00  |
|           | May 10 to May 16, 2021 | 60  | 0-0  | 0.00-0.00  | 6-23 | 7.23-27.71 |



|          |                        |     |      |            |       |            |
|----------|------------------------|-----|------|------------|-------|------------|
|          | May 17 to May 23, 2021 | 68  | 0-0  | 0.00-0.00  | 0-13  | 0.00-16.05 |
|          | May 24 to May 30, 2021 | 94  | 0-11 | 0.00-13.25 | 0-0   | 0.00-0.00  |
| Gunma    |                        |     |      |            |       |            |
|          | Apr 5 to Apr 11, 2021  | 86  | 0-0  | 0.00-0.00  | 0-0   | 0.00-0.00  |
|          | Apr 12 to Apr 18, 2021 | 77  | 0-0  | 0.00-0.00  | 0-11  | 0.00-12.50 |
|          | Apr 19 to Apr 25, 2021 | 65  | 0-0  | 0.00-0.00  | 4-23  | 4.55-26.14 |
|          | Apr 26 to May 2, 2021  | 85  | 0-0  | 0.00-0.00  | 0-2   | 0.00-2.30  |
|          | May 3 to May 9, 2021   | 79  | 0-0  | 0.00-0.00  | 0-8   | 0.00-9.20  |
|          | May 10 to May 16, 2021 | 77  | 0-0  | 0.00-0.00  | 0-10  | 0.00-11.49 |
|          | May 17 to May 23, 2021 | 72  | 0-0  | 0.00-0.00  | 0-14  | 0.00-16.28 |
|          | May 24 to May 30, 2021 | 85  | 0-0  | 0.00-0.00  | 0-1   | 0.00-1.16  |
| Saitama  |                        |     |      |            |       |            |
|          | Apr 5 to Apr 11, 2021  | 270 | 0-0  | 0.00-0.00  | 0-24  | 0.00-8.16  |
|          | Apr 12 to Apr 18, 2021 | 272 | 0-0  | 0.00-0.00  | 0-21  | 0.00-7.17  |
|          | Apr 19 to Apr 25, 2021 | 251 | 0-0  | 0.00-0.00  | 6-41  | 2.05-14.04 |
|          | Apr 26 to May 2, 2021  | 272 | 0-0  | 0.00-0.00  | 0-19  | 0.00-6.53  |
|          | May 3 to May 9, 2021   | 287 | 0-0  | 0.00-0.00  | 0-1   | 0.00-0.35  |
|          | May 10 to May 16, 2021 | 278 | 0-0  | 0.00-0.00  | 0-4   | 0.00-1.42  |
|          | May 17 to May 23, 2021 | 262 | 0-0  | 0.00-0.00  | 0-22  | 0.00-7.75  |
|          | May 24 to May 30, 2021 | 272 | 0-0  | 0.00-0.00  | 0-12  | 0.00-4.23  |
| Chiba    |                        |     |      |            |       |            |
|          | Apr 5 to Apr 11, 2021  | 262 | 0-0  | 0.00-0.00  | 0-4   | 0.00-1.50  |
|          | Apr 12 to Apr 18, 2021 | 264 | 0-0  | 0.00-0.00  | 0-0   | 0.00-0.00  |
|          | Apr 19 to Apr 25, 2021 | 215 | 0-0  | 0.00-0.00  | 14-47 | 5.34-17.94 |
|          | Apr 26 to May 2, 2021  | 246 | 0-0  | 0.00-0.00  | 0-14  | 0.00-5.38  |
|          | May 3 to May 9, 2021   | 253 | 0-0  | 0.00-0.00  | 0-5   | 0.00-1.94  |
|          | May 10 to May 16, 2021 | 221 | 0-0  | 0.00-0.00  | 1-33  | 0.39-12.99 |
|          | May 17 to May 23, 2021 | 213 | 0-0  | 0.00-0.00  | 7-38  | 2.79-15.14 |
|          | May 24 to May 30, 2021 | 246 | 0-0  | 0.00-0.00  | 0-7   | 0.00-2.77  |
| Tokyo    |                        |     |      |            |       |            |
|          | Apr 5 to Apr 11, 2021  | 379 | 0-0  | 0.00-0.00  | 25-76 | 5.49-16.70 |
|          | Apr 12 to Apr 18, 2021 | 432 | 0-0  | 0.00-0.00  | 0-21  | 0.00-4.64  |
|          | Apr 19 to Apr 25, 2021 | 451 | 0-3  | 0.00-0.67  | 0-0   | 0.00-0.00  |
|          | Apr 26 to May 2, 2021  | 448 | 0-1  | 0.00-0.22  | 0-0   | 0.00-0.00  |
|          | May 3 to May 9, 2021   | 420 | 0-0  | 0.00-0.00  | 0-26  | 0.00-5.83  |
|          | May 10 to May 16, 2021 | 406 | 0-0  | 0.00-0.00  | 0-36  | 0.00-8.14  |
|          | May 17 to May 23, 2021 | 390 | 0-0  | 0.00-0.00  | 3-53  | 0.68-11.96 |
|          | May 24 to May 30, 2021 | 413 | 0-0  | 0.00-0.00  | 0-29  | 0.00-6.56  |
| Kanagawa |                        |     |      |            |       |            |
|          | Apr 5 to Apr 11, 2021  | 268 | 0-0  | 0.00-0.00  | 0-35  | 0.00-11.55 |
|          | Apr 12 to Apr 18, 2021 | 272 | 0-0  | 0.00-0.00  | 0-30  | 0.00-9.93  |
|          | Apr 19 to Apr 25, 2021 | 285 | 0-0  | 0.00-0.00  | 0-17  | 0.00-5.63  |
|          | Apr 26 to May 2, 2021  | 276 | 0-0  | 0.00-0.00  | 0-23  | 0.00-7.69  |
|          | May 3 to May 9, 2021   | 260 | 0-0  | 0.00-0.00  | 0-37  | 0.00-12.46 |
|          | May 10 to May 16, 2021 | 263 | 0-0  | 0.00-0.00  | 0-35  | 0.00-11.74 |
|          | May 17 to May 23, 2021 | 260 | 0-0  | 0.00-0.00  | 0-36  | 0.00-12.16 |

|                        |                        |     |           |            |           |            |
|------------------------|------------------------|-----|-----------|------------|-----------|------------|
| Niigata                | May 24 to May 30, 2021 | 267 | 0-0       | 0.00-0.00  | 0-26      | 0.00-8.87  |
|                        | Apr 5 to Apr 11, 2021  | 117 | 0-0       | 0.00-0.00  | 0-14      | 0.00-10.69 |
|                        | Apr 12 to Apr 18, 2021 | 123 | 0-0       | 0.00-0.00  | 0-10      | 0.00-7.52  |
|                        | Apr 19 to Apr 25, 2021 | 132 | 0-0       | 0.00-0.00  | 0-1       | 0.00-0.75  |
|                        | Apr 26 to May 2, 2021  | 123 | 0-0       | 0.00-0.00  | 0-9       | 0.00-6.82  |
|                        | May 3 to May 9, 2021   | 98  | 0-0       | 0.00-0.00  | 11-33     | 8.40-25.19 |
|                        | May 10 to May 16, 2021 | 121 | 0-0       | 0.00-0.00  | 0-10      | 0.00-7.63  |
|                        | May 17 to May 23, 2021 | 117 | 0-0       | 0.00-0.00  | 0-15      | 0.00-11.36 |
| Toyama                 | May 24 to May 30, 2021 | 128 | 0-0       | 0.00-0.00  | 0-4       | 0.00-3.03  |
|                        | Apr 5 to Apr 11, 2021  | 45  | 0-0       | 0.00-0.00  | 0-8       | 0.00-15.09 |
|                        | Apr 12 to Apr 18, 2021 | 52  | 0-0       | 0.00-0.00  | 0-1       | 0.00-1.89  |
|                        | Apr 19 to Apr 25, 2021 | 59  | 0-7       | 0.00-13.46 | 0-0       | 0.00-0.00  |
|                        | Apr 26 to May 2, 2021  | 58  | 0-5       | 0.00-9.43  | 0-0       | 0.00-0.00  |
|                        | May 3 to May 9, 2021   | 56  | 0-3       | 0.00-5.66  | 0-0       | 0.00-0.00  |
|                        | May 10 to May 16, 2021 | 47  | 0-0       | 0.00-0.00  | 0-5       | 0.00-9.62  |
|                        | May 17 to May 23, 2021 | 39  | 0-0       | 0.00-0.00  | 1-14      | 1.89-26.42 |
| Ishikawa               | May 24 to May 30, 2021 | 52  | 0-0       | 0.00-0.00  | 0-2       | 0.00-3.70  |
|                        | Apr 5 to Apr 11, 2021  | 50  | 0-0       | 0.00-0.00  | 0-4       | 0.00-7.41  |
|                        | Apr 12 to Apr 18, 2021 | 59  | 0-5       | 0.00-9.26  | 0-0       | 0.00-0.00  |
|                        | Apr 19 to Apr 25, 2021 | 53  | 0-0       | 0.00-0.00  | 0-1       | 0.00-1.85  |
|                        | Apr 26 to May 2, 2021  | 51  | 0-0       | 0.00-0.00  | 0-2       | 0.00-3.77  |
|                        | May 3 to May 9, 2021   | 49  | 0-0       | 0.00-0.00  | 0-4       | 0.00-7.55  |
|                        | May 10 to May 16, 2021 | 54  | 0-1       | 0.00-1.89  | 0-0       | 0.00-0.00  |
|                        | May 17 to May 23, 2021 | 53  | 0-0       | 0.00-0.00  | 0-0       | 0.00-0.00  |
| Fukui                  | May 24 to May 30, 2021 | 43  | 0-0       | 0.00-0.00  | 0-10      | 0.00-18.87 |
|                        | Apr 5 to Apr 11, 2021  | 35  | 0-0       | 0.00-0.00  | 0-1       | 0.00-2.78  |
|                        | Apr 12 to Apr 18, 2021 | 42  | 0-6       | 0.00-16.67 | 0-0       | 0.00-0.00  |
|                        | Apr 19 to Apr 25, 2021 | 34  | 0-0       | 0.00-0.00  | 0-2       | 0.00-5.56  |
|                        | Apr 26 to May 2, 2021  | 35  | 0-0       | 0.00-0.00  | 0-1       | 0.00-2.78  |
|                        | May 3 to May 9, 2021   | 34  | 0-0       | 0.00-0.00  | 0-1       | 0.00-2.86  |
|                        | May 10 to May 16, 2021 | 34  | 0-0       | 0.00-0.00  | 0-2       | 0.00-5.56  |
|                        | May 17 to May 23, 2021 | 35  | 0-0       | 0.00-0.00  | 0-1       | 0.00-2.78  |
| Yamanashi              | May 24 to May 30, 2021 | 33  | 0-0       | 0.00-0.00  | 0-3       | 0.00-8.33  |
|                        | Apr 5 to Apr 11, 2021  | 30  | 0-0       | 0.00-0.00  | 0-8       | 0.00-21.05 |
|                        | Apr 12 to Apr 18, 2021 | 29  | 0-0       | 0.00-0.00  | 0-9       | 0.00-23.68 |
|                        | Apr 19 to Apr 25, 2021 | 31  | 0-0       | 0.00-0.00  | 0-6       | 0.00-16.22 |
|                        | Apr 26 to May 2, 2021  | 34  | 0-0       | 0.00-0.00  | 0-3       | 0.00-8.11  |
|                        | May 3 to May 9, 2021   | 43  | 0-6       | 0.00-16.22 | 0-0       | 0.00-0.00  |
|                        | May 10 to May 16, 2021 | 43  | 0-6       | 0.00-16.22 | 0-0       | 0.00-0.00  |
|                        | May 17 to May 23, 2021 | 39  | 0-1       | 0.00-2.63  | 0-0       | 0.00-0.00  |
| May 24 to May 30, 2021 | 36                     | 0-0 | 0.00-0.00 | 0-1        | 0.00-2.70 |            |

Nagano

|                        |     |     |           |      |            |
|------------------------|-----|-----|-----------|------|------------|
| Apr 5 to Apr 11, 2021  | 76  | 0-0 | 0.00-0.00 | 0-19 | 0.00-20.00 |
| Apr 12 to Apr 18, 2021 | 100 | 0-5 | 0.00-5.26 | 0-0  | 0.00-0.00  |
| Apr 19 to Apr 25, 2021 | 87  | 0-0 | 0.00-0.00 | 0-7  | 0.00-7.45  |
| Apr 26 to May 2, 2021  | 93  | 0-1 | 0.00-1.09 | 0-0  | 0.00-0.00  |
| May 3 to May 9, 2021   | 73  | 0-0 | 0.00-0.00 | 1-19 | 1.09-20.65 |
| May 10 to May 16, 2021 | 92  | 0-0 | 0.00-0.00 | 0-0  | 0.00-0.00  |
| May 17 to May 23, 2021 | 92  | 0-0 | 0.00-0.00 | 0-0  | 0.00-0.00  |
| May 24 to May 30, 2021 | 70  | 0-0 | 0.00-0.00 | 4-23 | 4.30-24.73 |

Gifu

|                        |    |     |           |      |            |
|------------------------|----|-----|-----------|------|------------|
| Apr 5 to Apr 11, 2021  | 77 | 0-0 | 0.00-0.00 | 0-7  | 0.00-8.33  |
| Apr 12 to Apr 18, 2021 | 77 | 0-0 | 0.00-0.00 | 0-6  | 0.00-7.23  |
| Apr 19 to Apr 25, 2021 | 80 | 0-0 | 0.00-0.00 | 0-2  | 0.00-2.44  |
| Apr 26 to May 2, 2021  | 63 | 0-0 | 0.00-0.00 | 0-18 | 0.00-22.22 |
| May 3 to May 9, 2021   | 90 | 0-8 | 0.00-9.76 | 0-0  | 0.00-0.00  |
| May 10 to May 16, 2021 | 83 | 0-1 | 0.00-1.22 | 0-0  | 0.00-0.00  |
| May 17 to May 23, 2021 | 86 | 0-3 | 0.00-3.61 | 0-0  | 0.00-0.00  |
| May 24 to May 30, 2021 | 82 | 0-0 | 0.00-0.00 | 0-1  | 0.00-1.20  |

Shizuoka

|                        |     |      |            |      |            |
|------------------------|-----|------|------------|------|------------|
| Apr 5 to Apr 11, 2021  | 163 | 0-8  | 0.00-5.16  | 0-0  | 0.00-0.00  |
| Apr 12 to Apr 18, 2021 | 137 | 0-0  | 0.00-0.00  | 0-17 | 0.00-11.04 |
| Apr 19 to Apr 25, 2021 | 140 | 0-0  | 0.00-0.00  | 0-13 | 0.00-8.50  |
| Apr 26 to May 2, 2021  | 147 | 0-0  | 0.00-0.00  | 0-6  | 0.00-3.92  |
| May 3 to May 9, 2021   | 140 | 0-0  | 0.00-0.00  | 0-13 | 0.00-8.50  |
| May 10 to May 16, 2021 | 140 | 0-0  | 0.00-0.00  | 0-13 | 0.00-8.50  |
| May 17 to May 23, 2021 | 170 | 0-17 | 0.00-11.11 | 0-0  | 0.00-0.00  |
| May 24 to May 30, 2021 | 148 | 0-0  | 0.00-0.00  | 0-4  | 0.00-2.63  |

Aichi

|                        |     |     |           |       |            |
|------------------------|-----|-----|-----------|-------|------------|
| Apr 5 to Apr 11, 2021  | 254 | 0-0 | 0.00-0.00 | 4-38  | 1.37-13.01 |
| Apr 12 to Apr 18, 2021 | 268 | 0-0 | 0.00-0.00 | 0-25  | 0.00-8.53  |
| Apr 19 to Apr 25, 2021 | 250 | 0-0 | 0.00-0.00 | 7-41  | 2.41-14.09 |
| Apr 26 to May 2, 2021  | 276 | 0-0 | 0.00-0.00 | 0-14  | 0.00-4.83  |
| May 3 to May 9, 2021   | 267 | 0-0 | 0.00-0.00 | 0-24  | 0.00-8.25  |
| May 10 to May 16, 2021 | 291 | 0-3 | 0.00-1.04 | 0-0   | 0.00-0.00  |
| May 17 to May 23, 2021 | 236 | 0-0 | 0.00-0.00 | 17-51 | 5.92-17.77 |
| May 24 to May 30, 2021 | 254 | 0-0 | 0.00-0.00 | 0-31  | 0.00-10.88 |

Mie

|                        |    |      |            |      |            |
|------------------------|----|------|------------|------|------------|
| Apr 5 to Apr 11, 2021  | 63 | 0-0  | 0.00-0.00  | 0-12 | 0.00-16.00 |
| Apr 12 to Apr 18, 2021 | 69 | 0-0  | 0.00-0.00  | 0-5  | 0.00-6.76  |
| Apr 19 to Apr 25, 2021 | 71 | 0-0  | 0.00-0.00  | 0-3  | 0.00-4.05  |
| Apr 26 to May 2, 2021  | 65 | 0-0  | 0.00-0.00  | 0-8  | 0.00-10.96 |
| May 3 to May 9, 2021   | 81 | 0-9  | 0.00-12.50 | 0-0  | 0.00-0.00  |
| May 10 to May 16, 2021 | 82 | 0-10 | 0.00-13.89 | 0-0  | 0.00-0.00  |
| May 17 to May 23, 2021 | 76 | 0-5  | 0.00-7.04  | 0-0  | 0.00-0.00  |
| May 24 to May 30, 2021 | 69 | 0-0  | 0.00-0.00  | 0-2  | 0.00-2.82  |

Shiga

|          |                        |     |      |            |      |            |
|----------|------------------------|-----|------|------------|------|------------|
|          | Apr 5 to Apr 11, 2021  | 50  | 0-0  | 0.00-0.00  | 0-10 | 0.00-16.67 |
|          | Apr 12 to Apr 18, 2021 | 54  | 0-0  | 0.00-0.00  | 0-6  | 0.00-10.00 |
|          | Apr 19 to Apr 25, 2021 | 47  | 0-0  | 0.00-0.00  | 0-13 | 0.00-21.67 |
|          | Apr 26 to May 2, 2021  | 61  | 0-2  | 0.00-3.39  | 0-0  | 0.00-0.00  |
|          | May 3 to May 9, 2021   | 40  | 0-0  | 0.00-0.00  | 4-19 | 6.78-32.20 |
|          | May 10 to May 16, 2021 | 45  | 0-0  | 0.00-0.00  | 0-12 | 0.00-21.05 |
|          | May 17 to May 23, 2021 | 61  | 0-2  | 0.00-3.39  | 0-0  | 0.00-0.00  |
|          | May 24 to May 30, 2021 | 54  | 0-0  | 0.00-0.00  | 0-5  | 0.00-8.47  |
| Kyoto    |                        |     |      |            |      |            |
|          | Apr 5 to Apr 11, 2021  | 93  | 0-0  | 0.00-0.00  | 5-26 | 4.20-21.85 |
|          | Apr 12 to Apr 18, 2021 | 132 | 0-14 | 0.00-11.86 | 0-0  | 0.00-0.00  |
|          | Apr 19 to Apr 25, 2021 | 117 | 0-0  | 0.00-0.00  | 0-0  | 0.00-0.00  |
|          | Apr 26 to May 2, 2021  | 121 | 0-4  | 0.00-3.42  | 0-0  | 0.00-0.00  |
|          | May 3 to May 9, 2021   | 108 | 0-0  | 0.00-0.00  | 0-9  | 0.00-7.69  |
|          | May 10 to May 16, 2021 | 111 | 0-0  | 0.00-0.00  | 0-6  | 0.00-5.13  |
|          | May 17 to May 23, 2021 | 92  | 0-0  | 0.00-0.00  | 5-26 | 4.24-22.03 |
|          | May 24 to May 30, 2021 | 107 | 0-0  | 0.00-0.00  | 0-10 | 0.00-8.55  |
| Osaka    |                        |     |      |            |      |            |
|          | Apr 5 to Apr 11, 2021  | 394 | 0-0  | 0.00-0.00  | 0-1  | 0.00-0.25  |
|          | Apr 12 to Apr 18, 2021 | 355 | 0-0  | 0.00-0.00  | 0-38 | 0.00-9.67  |
|          | Apr 19 to Apr 25, 2021 | 385 | 0-0  | 0.00-0.00  | 0-9  | 0.00-2.28  |
|          | Apr 26 to May 2, 2021  | 376 | 0-0  | 0.00-0.00  | 0-15 | 0.00-3.84  |
|          | May 3 to May 9, 2021   | 373 | 0-0  | 0.00-0.00  | 0-17 | 0.00-4.36  |
|          | May 10 to May 16, 2021 | 355 | 0-0  | 0.00-0.00  | 0-34 | 0.00-8.74  |
|          | May 17 to May 23, 2021 | 357 | 0-0  | 0.00-0.00  | 0-30 | 0.00-7.75  |
|          | May 24 to May 30, 2021 | 340 | 0-0  | 0.00-0.00  | 5-47 | 1.29-12.14 |
| Hyogo    |                        |     |      |            |      |            |
|          | Apr 5 to Apr 11, 2021  | 232 | 0-0  | 0.00-0.00  | 0-7  | 0.00-2.93  |
|          | Apr 12 to Apr 18, 2021 | 202 | 0-0  | 0.00-0.00  | 3-32 | 1.28-13.68 |
|          | Apr 19 to Apr 25, 2021 | 209 | 0-0  | 0.00-0.00  | 0-24 | 0.00-10.30 |
|          | Apr 26 to May 2, 2021  | 239 | 0-9  | 0.00-3.91  | 0-0  | 0.00-0.00  |
|          | May 3 to May 9, 2021   | 206 | 0-0  | 0.00-0.00  | 0-23 | 0.00-10.04 |
|          | May 10 to May 16, 2021 | 194 | 0-0  | 0.00-0.00  | 6-35 | 2.62-15.28 |
|          | May 17 to May 23, 2021 | 223 | 0-0  | 0.00-0.00  | 0-7  | 0.00-3.04  |
|          | May 24 to May 30, 2021 | 207 | 0-0  | 0.00-0.00  | 0-23 | 0.00-10.00 |
| Nara     |                        |     |      |            |      |            |
|          | Apr 5 to Apr 11, 2021  | 59  | 0-0  | 0.00-0.00  | 0-2  | 0.00-3.28  |
|          | Apr 12 to Apr 18, 2021 | 56  | 0-0  | 0.00-0.00  | 0-5  | 0.00-8.20  |
|          | Apr 19 to Apr 25, 2021 | 66  | 0-5  | 0.00-8.20  | 0-0  | 0.00-0.00  |
|          | Apr 26 to May 2, 2021  | 48  | 0-0  | 0.00-0.00  | 0-14 | 0.00-22.58 |
|          | May 3 to May 9, 2021   | 69  | 0-6  | 0.00-9.52  | 0-0  | 0.00-0.00  |
|          | May 10 to May 16, 2021 | 67  | 0-4  | 0.00-6.35  | 0-0  | 0.00-0.00  |
|          | May 17 to May 23, 2021 | 50  | 0-0  | 0.00-0.00  | 0-12 | 0.00-19.35 |
|          | May 24 to May 30, 2021 | 60  | 0-0  | 0.00-0.00  | 0-3  | 0.00-4.76  |
| Wakayama |                        |     |      |            |      |            |
|          | Apr 5 to Apr 11, 2021  | 44  | 0-0  | 0.00-0.00  | 0-3  | 0.00-6.38  |

|           |                        |     |     |            |      |            |
|-----------|------------------------|-----|-----|------------|------|------------|
|           | Apr 12 to Apr 18, 2021 | 45  | 0-0 | 0.00-0.00  | 0-2  | 0.00-4.26  |
|           | Apr 19 to Apr 25, 2021 | 40  | 0-0 | 0.00-0.00  | 0-8  | 0.00-16.67 |
|           | Apr 26 to May 2, 2021  | 45  | 0-0 | 0.00-0.00  | 0-2  | 0.00-4.26  |
|           | May 3 to May 9, 2021   | 44  | 0-0 | 0.00-0.00  | 0-2  | 0.00-4.35  |
|           | May 10 to May 16, 2021 | 49  | 0-3 | 0.00-6.52  | 0-0  | 0.00-0.00  |
|           | May 17 to May 23, 2021 | 46  | 0-1 | 0.00-2.22  | 0-0  | 0.00-0.00  |
|           | May 24 to May 30, 2021 | 50  | 0-4 | 0.00-8.70  | 0-0  | 0.00-0.00  |
| Tottori   |                        |     |     |            |      |            |
|           | Apr 5 to Apr 11, 2021  | 33  | 0-4 | 0.00-13.79 | 0-0  | 0.00-0.00  |
|           | Apr 12 to Apr 18, 2021 | 25  | 0-0 | 0.00-0.00  | 0-4  | 0.00-13.79 |
|           | Apr 19 to Apr 25, 2021 | 26  | 0-0 | 0.00-0.00  | 0-2  | 0.00-7.14  |
|           | Apr 26 to May 2, 2021  | 30  | 0-2 | 0.00-7.14  | 0-0  | 0.00-0.00  |
|           | May 3 to May 9, 2021   | 33  | 0-5 | 0.00-17.86 | 0-0  | 0.00-0.00  |
|           | May 10 to May 16, 2021 | 31  | 0-2 | 0.00-6.90  | 0-0  | 0.00-0.00  |
|           | May 17 to May 23, 2021 | 35  | 0-6 | 0.00-20.69 | 0-0  | 0.00-0.00  |
|           | May 24 to May 30, 2021 | 29  | 0-0 | 0.00-0.00  | 0-0  | 0.00-0.00  |
| Shimane   |                        |     |     |            |      |            |
|           | Apr 5 to Apr 11, 2021  | 30  | 0-0 | 0.00-0.00  | 0-8  | 0.00-21.05 |
|           | Apr 12 to Apr 18, 2021 | 39  | 0-1 | 0.00-2.63  | 0-0  | 0.00-0.00  |
|           | Apr 19 to Apr 25, 2021 | 37  | 0-0 | 0.00-0.00  | 0-1  | 0.00-2.63  |
|           | Apr 26 to May 2, 2021  | 45  | 0-8 | 0.00-21.62 | 0-0  | 0.00-0.00  |
|           | May 3 to May 9, 2021   | 45  | 0-8 | 0.00-21.62 | 0-0  | 0.00-0.00  |
|           | May 10 to May 16, 2021 | 39  | 0-2 | 0.00-5.41  | 0-0  | 0.00-0.00  |
|           | May 17 to May 23, 2021 | 30  | 0-0 | 0.00-0.00  | 0-7  | 0.00-18.92 |
|           | May 24 to May 30, 2021 | 42  | 0-5 | 0.00-13.51 | 0-0  | 0.00-0.00  |
| Okayama   |                        |     |     |            |      |            |
|           | Apr 5 to Apr 11, 2021  | 93  | 0-3 | 0.00-3.33  | 0-0  | 0.00-0.00  |
|           | Apr 12 to Apr 18, 2021 | 87  | 0-0 | 0.00-0.00  | 0-1  | 0.00-1.14  |
|           | Apr 19 to Apr 25, 2021 | 84  | 0-0 | 0.00-0.00  | 0-4  | 0.00-4.55  |
|           | Apr 26 to May 2, 2021  | 74  | 0-0 | 0.00-0.00  | 0-15 | 0.00-16.85 |
|           | May 3 to May 9, 2021   | 77  | 0-0 | 0.00-0.00  | 0-14 | 0.00-15.38 |
|           | May 10 to May 16, 2021 | 90  | 0-1 | 0.00-1.12  | 0-0  | 0.00-0.00  |
|           | May 17 to May 23, 2021 | 81  | 0-0 | 0.00-0.00  | 0-6  | 0.00-6.90  |
|           | May 24 to May 30, 2021 | 76  | 0-0 | 0.00-0.00  | 0-12 | 0.00-13.64 |
| Hiroshima |                        |     |     |            |      |            |
|           | Apr 5 to Apr 11, 2021  | 130 | 0-1 | 0.00-0.78  | 0-0  | 0.00-0.00  |
|           | Apr 12 to Apr 18, 2021 | 129 | 0-0 | 0.00-0.00  | 0-1  | 0.00-0.77  |
|           | Apr 19 to Apr 25, 2021 | 127 | 0-0 | 0.00-0.00  | 0-3  | 0.00-2.31  |
|           | Apr 26 to May 2, 2021  | 117 | 0-0 | 0.00-0.00  | 0-13 | 0.00-10.00 |
|           | May 3 to May 9, 2021   | 120 | 0-0 | 0.00-0.00  | 0-7  | 0.00-5.51  |
|           | May 10 to May 16, 2021 | 133 | 0-7 | 0.00-5.56  | 0-0  | 0.00-0.00  |
|           | May 17 to May 23, 2021 | 121 | 0-0 | 0.00-0.00  | 0-6  | 0.00-4.72  |
|           | May 24 to May 30, 2021 | 124 | 0-0 | 0.00-0.00  | 0-3  | 0.00-2.36  |
| Yamaguchi |                        |     |     |            |      |            |
|           | Apr 5 to Apr 11, 2021  | 58  | 0-0 | 0.00-0.00  | 3-21 | 3.80-26.58 |
|           | Apr 12 to Apr 18, 2021 | 75  | 0-0 | 0.00-0.00  | 0-4  | 0.00-5.06  |

|           |                        |     |      |            |       |             |
|-----------|------------------------|-----|------|------------|-------|-------------|
|           | Apr 19 to Apr 25, 2021 | 87  | 0-8  | 0.00-10.13 | 0-0   | 0.00-0.00   |
|           | Apr 26 to May 2, 2021  | 78  | 0-0  | 0.00-0.00  | 0-2   | 0.00-2.50   |
|           | May 3 to May 9, 2021   | 79  | 0-1  | 0.00-1.28  | 0-0   | 0.00-0.00   |
|           | May 10 to May 16, 2021 | 73  | 0-0  | 0.00-0.00  | 0-5   | 0.00-6.41   |
|           | May 17 to May 23, 2021 | 71  | 0-0  | 0.00-0.00  | 0-8   | 0.00-10.13  |
|           | May 24 to May 30, 2021 | 84  | 0-6  | 0.00-7.69  | 0-0   | 0.00-0.00   |
| Tokushima |                        |     |      |            |       |             |
|           | Apr 5 to Apr 11, 2021  | 46  | 0-9  | 0.00-24.32 | 0-0   | 0.00-0.00   |
|           | Apr 12 to Apr 18, 2021 | 23  | 0-0  | 0.00-0.00  | 2-14  | 5.41-37.84  |
|           | Apr 19 to Apr 25, 2021 | 47  | 0-9  | 0.00-23.68 | 0-0   | 0.00-0.00   |
|           | Apr 26 to May 2, 2021  | 32  | 0-0  | 0.00-0.00  | 0-5   | 0.00-13.51  |
|           | May 3 to May 9, 2021   | 21  | 0-0  | 0.00-0.00  | 5-17  | 13.16-44.74 |
|           | May 10 to May 16, 2021 | 44  | 0-6  | 0.00-15.79 | 0-0   | 0.00-0.00   |
|           | May 17 to May 23, 2021 | 29  | 0-0  | 0.00-0.00  | 0-10  | 0.00-25.64  |
|           | May 24 to May 30, 2021 | 33  | 0-0  | 0.00-0.00  | 0-6   | 0.00-15.38  |
| Kagawa    |                        |     |      |            |       |             |
|           | Apr 5 to Apr 11, 2021  | 39  | 0-0  | 0.00-0.00  | 0-9   | 0.00-18.75  |
|           | Apr 12 to Apr 18, 2021 | 50  | 0-2  | 0.00-4.17  | 0-0   | 0.00-0.00   |
|           | Apr 19 to Apr 25, 2021 | 44  | 0-0  | 0.00-0.00  | 0-3   | 0.00-6.38   |
|           | Apr 26 to May 2, 2021  | 38  | 0-0  | 0.00-0.00  | 0-8   | 0.00-17.39  |
|           | May 3 to May 9, 2021   | 46  | 0-1  | 0.00-2.22  | 0-0   | 0.00-0.00   |
|           | May 10 to May 16, 2021 | 36  | 0-0  | 0.00-0.00  | 0-8   | 0.00-18.18  |
|           | May 17 to May 23, 2021 | 50  | 0-6  | 0.00-13.64 | 0-0   | 0.00-0.00   |
|           | May 24 to May 30, 2021 | 38  | 0-0  | 0.00-0.00  | 0-5   | 0.00-11.63  |
| Ehime     |                        |     |      |            |       |             |
|           | Apr 5 to Apr 11, 2021  | 62  | 0-0  | 0.00-0.00  | 0-6   | 0.00-8.82   |
|           | Apr 12 to Apr 18, 2021 | 66  | 0-0  | 0.00-0.00  | 0-2   | 0.00-2.94   |
|           | Apr 19 to Apr 25, 2021 | 65  | 0-0  | 0.00-0.00  | 0-3   | 0.00-4.41   |
|           | Apr 26 to May 2, 2021  | 75  | 0-7  | 0.00-10.29 | 0-0   | 0.00-0.00   |
|           | May 3 to May 9, 2021   | 55  | 0-0  | 0.00-0.00  | 0-13  | 0.00-19.12  |
|           | May 10 to May 16, 2021 | 64  | 0-0  | 0.00-0.00  | 0-3   | 0.00-4.48   |
|           | May 17 to May 23, 2021 | 64  | 0-0  | 0.00-0.00  | 0-3   | 0.00-4.48   |
|           | May 24 to May 30, 2021 | 75  | 0-8  | 0.00-11.94 | 0-0   | 0.00-0.00   |
| Kochi     |                        |     |      |            |       |             |
|           | Apr 5 to Apr 11, 2021  | 34  | 0-0  | 0.00-0.00  | 0-9   | 0.00-20.93  |
|           | Apr 12 to Apr 18, 2021 | 34  | 0-0  | 0.00-0.00  | 0-8   | 0.00-19.05  |
|           | Apr 19 to Apr 25, 2021 | 51  | 0-9  | 0.00-21.43 | 0-0   | 0.00-0.00   |
|           | Apr 26 to May 2, 2021  | 41  | 0-0  | 0.00-0.00  | 0-2   | 0.00-4.65   |
|           | May 3 to May 9, 2021   | 37  | 0-0  | 0.00-0.00  | 0-5   | 0.00-11.90  |
|           | May 10 to May 16, 2021 | 38  | 0-0  | 0.00-0.00  | 0-4   | 0.00-9.52   |
|           | May 17 to May 23, 2021 | 37  | 0-0  | 0.00-0.00  | 0-6   | 0.00-13.95  |
|           | May 24 to May 30, 2021 | 37  | 0-0  | 0.00-0.00  | 0-4   | 0.00-9.76   |
| Fukuoka   |                        |     |      |            |       |             |
|           | Apr 5 to Apr 11, 2021  | 207 | 0-0  | 0.00-0.00  | 14-45 | 5.56-17.86  |
|           | Apr 12 to Apr 18, 2021 | 240 | 0-0  | 0.00-0.00  | 0-9   | 0.00-3.61   |
|           | Apr 19 to Apr 25, 2021 | 270 | 0-21 | 0.00-8.43  | 0-0   | 0.00-0.00   |

|          |                        |     |      |            |      |            |
|----------|------------------------|-----|------|------------|------|------------|
|          | Apr 26 to May 2, 2021  | 253 | 0-5  | 0.00-2.02  | 0-0  | 0.00-0.00  |
|          | May 3 to May 9, 2021   | 238 | 0-0  | 0.00-0.00  | 0-8  | 0.00-3.25  |
|          | May 10 to May 16, 2021 | 249 | 0-5  | 0.00-2.05  | 0-0  | 0.00-0.00  |
|          | May 17 to May 23, 2021 | 240 | 0-0  | 0.00-0.00  | 0-5  | 0.00-2.04  |
|          | May 24 to May 30, 2021 | 225 | 0-0  | 0.00-0.00  | 0-19 | 0.00-7.79  |
| Saga     |                        |     |      |            |      |            |
|          | Apr 5 to Apr 11, 2021  | 40  | 0-0  | 0.00-0.00  | 0-3  | 0.00-6.98  |
|          | Apr 12 to Apr 18, 2021 | 26  | 0-0  | 0.00-0.00  | 4-16 | 9.52-38.10 |
|          | Apr 19 to Apr 25, 2021 | 44  | 0-2  | 0.00-4.76  | 0-0  | 0.00-0.00  |
|          | Apr 26 to May 2, 2021  | 34  | 0-0  | 0.00-0.00  | 0-7  | 0.00-17.07 |
|          | May 3 to May 9, 2021   | 47  | 0-6  | 0.00-14.63 | 0-0  | 0.00-0.00  |
|          | May 10 to May 16, 2021 | 48  | 0-7  | 0.00-17.07 | 0-0  | 0.00-0.00  |
|          | May 17 to May 23, 2021 | 35  | 0-0  | 0.00-0.00  | 0-7  | 0.00-16.67 |
|          | May 24 to May 30, 2021 | 40  | 0-0  | 0.00-0.00  | 0-3  | 0.00-6.98  |
| Nagasaki |                        |     |      |            |      |            |
|          | Apr 5 to Apr 11, 2021  | 65  | 0-0  | 0.00-0.00  | 0-15 | 0.00-18.75 |
|          | Apr 12 to Apr 18, 2021 | 67  | 0-0  | 0.00-0.00  | 0-13 | 0.00-16.25 |
|          | Apr 19 to Apr 25, 2021 | 64  | 0-0  | 0.00-0.00  | 0-16 | 0.00-20.00 |
|          | Apr 26 to May 2, 2021  | 78  | 0-0  | 0.00-0.00  | 0-0  | 0.00-0.00  |
|          | May 3 to May 9, 2021   | 80  | 0-0  | 0.00-0.00  | 0-0  | 0.00-0.00  |
|          | May 10 to May 16, 2021 | 74  | 0-0  | 0.00-0.00  | 0-4  | 0.00-5.13  |
|          | May 17 to May 23, 2021 | 74  | 0-0  | 0.00-0.00  | 0-3  | 0.00-3.90  |
|          | May 24 to May 30, 2021 | 80  | 0-4  | 0.00-5.26  | 0-0  | 0.00-0.00  |
| Kumamoto |                        |     |      |            |      |            |
|          | Apr 5 to Apr 11, 2021  | 86  | 0-0  | 0.00-0.00  | 0-0  | 0.00-0.00  |
|          | Apr 12 to Apr 18, 2021 | 109 | 4-23 | 4.65-26.74 | 0-0  | 0.00-0.00  |
|          | Apr 19 to Apr 25, 2021 | 88  | 0-2  | 0.00-2.33  | 0-0  | 0.00-0.00  |
|          | Apr 26 to May 2, 2021  | 87  | 0-1  | 0.00-1.16  | 0-0  | 0.00-0.00  |
|          | May 3 to May 9, 2021   | 81  | 0-0  | 0.00-0.00  | 0-5  | 0.00-5.81  |
|          | May 10 to May 16, 2021 | 82  | 0-0  | 0.00-0.00  | 0-4  | 0.00-4.65  |
|          | May 17 to May 23, 2021 | 92  | 0-5  | 0.00-5.75  | 0-0  | 0.00-0.00  |
|          | May 24 to May 30, 2021 | 82  | 0-0  | 0.00-0.00  | 0-3  | 0.00-3.53  |
| Oita     |                        |     |      |            |      |            |
|          | Apr 5 to Apr 11, 2021  | 45  | 0-0  | 0.00-0.00  | 0-12 | 0.00-21.05 |
|          | Apr 12 to Apr 18, 2021 | 63  | 0-7  | 0.00-12.50 | 0-0  | 0.00-0.00  |
|          | Apr 19 to Apr 25, 2021 | 57  | 0-1  | 0.00-1.79  | 0-0  | 0.00-0.00  |
|          | Apr 26 to May 2, 2021  | 49  | 0-0  | 0.00-0.00  | 0-7  | 0.00-12.50 |
|          | May 3 to May 9, 2021   | 51  | 0-0  | 0.00-0.00  | 0-4  | 0.00-7.27  |
|          | May 10 to May 16, 2021 | 58  | 0-2  | 0.00-3.57  | 0-0  | 0.00-0.00  |
|          | May 17 to May 23, 2021 | 56  | 0-0  | 0.00-0.00  | 0-0  | 0.00-0.00  |
|          | May 24 to May 30, 2021 | 73  | 4-19 | 7.41-35.19 | 0-0  | 0.00-0.00  |
| Miyazaki |                        |     |      |            |      |            |
|          | Apr 5 to Apr 11, 2021  | 75  | 2-17 | 3.45-29.31 | 0-0  | 0.00-0.00  |
|          | Apr 12 to Apr 18, 2021 | 53  | 0-0  | 0.00-0.00  | 0-5  | 0.00-8.62  |
|          | Apr 19 to Apr 25, 2021 | 58  | 0-0  | 0.00-0.00  | 0-0  | 0.00-0.00  |
|          | Apr 26 to May 2, 2021  | 50  | 0-0  | 0.00-0.00  | 0-8  | 0.00-13.79 |

|           |                        |    |     |            |      |            |
|-----------|------------------------|----|-----|------------|------|------------|
|           | May 3 to May 9, 2021   | 58 | 0-0 | 0.00-0.00  | 0-0  | 0.00-0.00  |
|           | May 10 to May 16, 2021 | 57 | 0-0 | 0.00-0.00  | 0-1  | 0.00-1.72  |
|           | May 17 to May 23, 2021 | 63 | 0-5 | 0.00-8.62  | 0-0  | 0.00-0.00  |
|           | May 24 to May 30, 2021 | 53 | 0-0 | 0.00-0.00  | 0-4  | 0.00-7.02  |
| Kagoshima |                        |    |     |            |      |            |
|           | Apr 5 to Apr 11, 2021  | 87 | 0-6 | 0.00-7.41  | 0-0  | 0.00-0.00  |
|           | Apr 12 to Apr 18, 2021 | 80 | 0-0 | 0.00-0.00  | 0-1  | 0.00-1.23  |
|           | Apr 19 to Apr 25, 2021 | 61 | 0-0 | 0.00-0.00  | 1-19 | 1.25-23.75 |
|           | Apr 26 to May 2, 2021  | 71 | 0-0 | 0.00-0.00  | 0-10 | 0.00-12.35 |
|           | May 3 to May 9, 2021   | 86 | 0-5 | 0.00-6.17  | 0-0  | 0.00-0.00  |
|           | May 10 to May 16, 2021 | 71 | 0-0 | 0.00-0.00  | 0-8  | 0.00-10.13 |
|           | May 17 to May 23, 2021 | 77 | 0-0 | 0.00-0.00  | 0-1  | 0.00-1.28  |
|           | May 24 to May 30, 2021 | 75 | 0-0 | 0.00-0.00  | 0-4  | 0.00-5.06  |
| Okinawa   |                        |    |     |            |      |            |
|           | Apr 5 to Apr 11, 2021  | 60 | 0-8 | 0.00-15.38 | 0-0  | 0.00-0.00  |
|           | Apr 12 to Apr 18, 2021 | 56 | 0-3 | 0.00-5.66  | 0-0  | 0.00-0.00  |
|           | Apr 19 to Apr 25, 2021 | 55 | 0-3 | 0.00-5.77  | 0-0  | 0.00-0.00  |
|           | Apr 26 to May 2, 2021  | 44 | 0-0 | 0.00-0.00  | 0-8  | 0.00-15.38 |
|           | May 3 to May 9, 2021   | 45 | 0-0 | 0.00-0.00  | 0-8  | 0.00-15.09 |
|           | May 10 to May 16, 2021 | 46 | 0-0 | 0.00-0.00  | 0-6  | 0.00-11.54 |
|           | May 17 to May 23, 2021 | 53 | 0-0 | 0.00-0.00  | 0-0  | 0.00-0.00  |
|           | May 24 to May 30, 2021 | 49 | 0-0 | 0.00-0.00  | 0-3  | 0.00-5.77  |

---



**Table A.15: Weekly number of observed and excess/exiguous deaths in Japan and 47 prefectures for malignant neoplasms-related deaths in nursing homes and elderly care facilities from January 2020 through May 2021.**

| Prefecture | Week                   | Observed | Excess deaths | Percent excess | Exiguous deaths | Percent exiguous |
|------------|------------------------|----------|---------------|----------------|-----------------|------------------|
| Japan      |                        |          |               |                |                 |                  |
|            | Apr 5 to Apr 11, 2021  | 403      | 0–35          | 0.00–9.51      | 0–0             | 0.00–0.00        |
|            | Apr 12 to Apr 18, 2021 | 433      | 29–68         | 7.95–18.63     | 0–0             | 0.00–0.00        |
|            | Apr 19 to Apr 25, 2021 | 426      | 23–63         | 6.34–17.36     | 0–0             | 0.00–0.00        |
|            | Apr 26 to May 2, 2021  | 465      | 62–101        | 17.03–27.75    | 0–0             | 0.00–0.00        |
|            | May 3 to May 9, 2021   | 491      | 88–127        | 24.18–34.89    | 0–0             | 0.00–0.00        |
|            | May 10 to May 16, 2021 | 428      | 21–60         | 5.71–16.30     | 0–0             | 0.00–0.00        |
|            | May 17 to May 23, 2021 | 463      | 58–97         | 15.85–26.50    | 0–0             | 0.00–0.00        |
|            | May 24 to May 30, 2021 | 473      | 69–108        | 18.90–29.59    | 0–0             | 0.00–0.00        |
| Hokkaido   |                        |          |               |                |                 |                  |
|            | Apr 5 to Apr 11, 2021  | 9        | 0–0           | 0.00–0.00      | 0–0             | 0.00–0.00        |
|            | Apr 12 to Apr 18, 2021 | 17       | 2–8           | 22.22–88.89    | 0–0             | 0.00–0.00        |
|            | Apr 19 to Apr 25, 2021 | 8        | 0–0           | 0.00–0.00      | 0–1             | 0.00–11.11       |
|            | Apr 26 to May 2, 2021  | 12       | 0–2           | 0.00–20.00     | 0–0             | 0.00–0.00        |
|            | May 3 to May 9, 2021   | 23       | 6–13          | 60.00–130.00   | 0–0             | 0.00–0.00        |
|            | May 10 to May 16, 2021 | 7        | 0–0           | 0.00–0.00      | 0–3             | 0.00–30.00       |
|            | May 17 to May 23, 2021 | 8        | 0–0           | 0.00–0.00      | 0–2             | 0.00–20.00       |
|            | May 24 to May 30, 2021 | 8        | 0–0           | 0.00–0.00      | 0–2             | 0.00–20.00       |
| Aomori     |                        |          |               |                |                 |                  |
|            | Apr 5 to Apr 11, 2021  | 10       | 0–5           | 0.00–100.00    | 0–0             | 0.00–0.00        |
|            | Apr 12 to Apr 18, 2021 | 4        | 0–0           | 0.00–0.00      | 0–1             | 0.00–20.00       |
|            | Apr 19 to Apr 25, 2021 | 6        | 0–1           | 0.00–20.00     | 0–0             | 0.00–0.00        |
|            | Apr 26 to May 2, 2021  | 7        | 0–2           | 0.00–40.00     | 0–0             | 0.00–0.00        |
|            | May 3 to May 9, 2021   | 9        | 0–4           | 0.00–80.00     | 0–0             | 0.00–0.00        |
|            | May 10 to May 16, 2021 | 6        | 0–1           | 0.00–20.00     | 0–0             | 0.00–0.00        |
|            | May 17 to May 23, 2021 | 11       | 1–6           | 20.00–120.00   | 0–0             | 0.00–0.00        |
|            | May 24 to May 30, 2021 | 8        | 0–3           | 0.00–60.00     | 0–0             | 0.00–0.00        |
| Iwate      |                        |          |               |                |                 |                  |
|            | Apr 5 to Apr 11, 2021  | 4        | 0–0           | 0.00–0.00      | 0–1             | 0.00–20.00       |
|            | Apr 12 to Apr 18, 2021 | 6        | 0–1           | 0.00–20.00     | 0–0             | 0.00–0.00        |
|            | Apr 19 to Apr 25, 2021 | 4        | 0–0           | 0.00–0.00      | 0–0             | 0.00–0.00        |
|            | Apr 26 to May 2, 2021  | 10       | 1–6           | 25.00–150.00   | 0–0             | 0.00–0.00        |
|            | May 3 to May 9, 2021   | 6        | 0–1           | 0.00–20.00     | 0–0             | 0.00–0.00        |
|            | May 10 to May 16, 2021 | 4        | 0–0           | 0.00–0.00      | 0–1             | 0.00–20.00       |
|            | May 17 to May 23, 2021 | 5        | 0–0           | 0.00–0.00      | 0–0             | 0.00–0.00        |
|            | May 24 to May 30, 2021 | 7        | 0–2           | 0.00–40.00     | 0–0             | 0.00–0.00        |
| Miyagi     |                        |          |               |                |                 |                  |
|            | Apr 5 to Apr 11, 2021  | 9        | 0–3           | 0.00–50.00     | 0–0             | 0.00–0.00        |
|            | Apr 12 to Apr 18, 2021 | 10       | 0–4           | 0.00–66.67     | 0–0             | 0.00–0.00        |
|            | Apr 19 to Apr 25, 2021 | 9        | 0–2           | 0.00–28.57     | 0–0             | 0.00–0.00        |
|            | Apr 26 to May 2, 2021  | 8        | 0–1           | 0.00–14.29     | 0–0             | 0.00–0.00        |
|            | May 3 to May 9, 2021   | 13       | 0–6           | 0.00–85.71     | 0–0             | 0.00–0.00        |

|           |                        |    |     |              |     |             |
|-----------|------------------------|----|-----|--------------|-----|-------------|
|           | May 10 to May 16, 2021 | 11 | 0-4 | 0.00-57.14   | 0-0 | 0.00-0.00   |
|           | May 17 to May 23, 2021 | 4  | 0-0 | 0.00-0.00    | 0-3 | 0.00-42.86  |
|           | May 24 to May 30, 2021 | 8  | 0-1 | 0.00-14.29   | 0-0 | 0.00-0.00   |
| Akita     |                        |    |     |              |     |             |
|           | Apr 5 to Apr 11, 2021  | 3  | 0-0 | 0.00-0.00    | 0-0 | 0.00-0.00   |
|           | Apr 12 to Apr 18, 2021 | 4  | 0-1 | 0.00-33.33   | 0-0 | 0.00-0.00   |
|           | Apr 19 to Apr 25, 2021 | 3  | 0-0 | 0.00-0.00    | 0-0 | 0.00-0.00   |
|           | Apr 26 to May 2, 2021  | 3  | 0-0 | 0.00-0.00    | 0-0 | 0.00-0.00   |
|           | May 3 to May 9, 2021   | 6  | 0-3 | 0.00-100.00  | 0-0 | 0.00-0.00   |
|           | May 10 to May 16, 2021 | 0  | 0-0 | 0.00-0.00    | 0-3 | 0.00-100.00 |
|           | May 17 to May 23, 2021 | 4  | 0-1 | 0.00-33.33   | 0-0 | 0.00-0.00   |
|           | May 24 to May 30, 2021 | 6  | 0-3 | 0.00-100.00  | 0-0 | 0.00-0.00   |
| Yamagata  |                        |    |     |              |     |             |
|           | Apr 5 to Apr 11, 2021  | 6  | 0-0 | 0.00-0.00    | 0-0 | 0.00-0.00   |
|           | Apr 12 to Apr 18, 2021 | 5  | 0-0 | 0.00-0.00    | 0-1 | 0.00-16.67  |
|           | Apr 19 to Apr 25, 2021 | 2  | 0-0 | 0.00-0.00    | 0-3 | 0.00-60.00  |
|           | Apr 26 to May 2, 2021  | 6  | 0-1 | 0.00-20.00   | 0-0 | 0.00-0.00   |
|           | May 3 to May 9, 2021   | 10 | 0-5 | 0.00-100.00  | 0-0 | 0.00-0.00   |
|           | May 10 to May 16, 2021 | 10 | 1-5 | 20.00-100.00 | 0-0 | 0.00-0.00   |
|           | May 17 to May 23, 2021 | 9  | 0-4 | 0.00-80.00   | 0-0 | 0.00-0.00   |
|           | May 24 to May 30, 2021 | 6  | 0-2 | 0.00-50.00   | 0-0 | 0.00-0.00   |
| Fukushima |                        |    |     |              |     |             |
|           | Apr 5 to Apr 11, 2021  | 4  | 0-0 | 0.00-0.00    | 0-1 | 0.00-20.00  |
|           | Apr 12 to Apr 18, 2021 | 2  | 0-0 | 0.00-0.00    | 0-3 | 0.00-60.00  |
|           | Apr 19 to Apr 25, 2021 | 5  | 0-0 | 0.00-0.00    | 0-0 | 0.00-0.00   |
|           | Apr 26 to May 2, 2021  | 6  | 0-2 | 0.00-50.00   | 0-0 | 0.00-0.00   |
|           | May 3 to May 9, 2021   | 9  | 0-4 | 0.00-80.00   | 0-0 | 0.00-0.00   |
|           | May 10 to May 16, 2021 | 4  | 0-0 | 0.00-0.00    | 0-1 | 0.00-20.00  |
|           | May 17 to May 23, 2021 | 2  | 0-0 | 0.00-0.00    | 0-3 | 0.00-60.00  |
|           | May 24 to May 30, 2021 | 7  | 0-2 | 0.00-40.00   | 0-0 | 0.00-0.00   |
| Ibaraki   |                        |    |     |              |     |             |
|           | Apr 5 to Apr 11, 2021  | 8  | 0-1 | 0.00-14.29   | 0-0 | 0.00-0.00   |
|           | Apr 12 to Apr 18, 2021 | 7  | 0-0 | 0.00-0.00    | 0-0 | 0.00-0.00   |
|           | Apr 19 to Apr 25, 2021 | 1  | 0-0 | 0.00-0.00    | 1-6 | 14.29-85.71 |
|           | Apr 26 to May 2, 2021  | 5  | 0-0 | 0.00-0.00    | 0-2 | 0.00-28.57  |
|           | May 3 to May 9, 2021   | 10 | 0-3 | 0.00-42.86   | 0-0 | 0.00-0.00   |
|           | May 10 to May 16, 2021 | 10 | 0-3 | 0.00-42.86   | 0-0 | 0.00-0.00   |
|           | May 17 to May 23, 2021 | 10 | 0-3 | 0.00-42.86   | 0-0 | 0.00-0.00   |
|           | May 24 to May 30, 2021 | 3  | 0-0 | 0.00-0.00    | 0-4 | 0.00-57.14  |
| Tochigi   |                        |    |     |              |     |             |
|           | Apr 5 to Apr 11, 2021  | 2  | 0-0 | 0.00-0.00    | 1-5 | 14.29-71.43 |
|           | Apr 12 to Apr 18, 2021 | 7  | 0-0 | 0.00-0.00    | 0-0 | 0.00-0.00   |
|           | Apr 19 to Apr 25, 2021 | 7  | 0-0 | 0.00-0.00    | 0-0 | 0.00-0.00   |
|           | Apr 26 to May 2, 2021  | 5  | 0-0 | 0.00-0.00    | 0-2 | 0.00-28.57  |
|           | May 3 to May 9, 2021   | 7  | 0-0 | 0.00-0.00    | 0-0 | 0.00-0.00   |
|           | May 10 to May 16, 2021 | 9  | 0-2 | 0.00-28.57   | 0-0 | 0.00-0.00   |

|          |                        |    |      |             |     |            |
|----------|------------------------|----|------|-------------|-----|------------|
|          | May 17 to May 23, 2021 | 8  | 0-1  | 0.00-14.29  | 0-0 | 0.00-0.00  |
|          | May 24 to May 30, 2021 | 5  | 0-0  | 0.00-0.00   | 0-1 | 0.00-16.67 |
| Gunma    |                        |    |      |             |     |            |
|          | Apr 5 to Apr 11, 2021  | 13 | 0-4  | 0.00-44.44  | 0-0 | 0.00-0.00  |
|          | Apr 12 to Apr 18, 2021 | 18 | 2-8  | 20.00-80.00 | 0-0 | 0.00-0.00  |
|          | Apr 19 to Apr 25, 2021 | 10 | 0-0  | 0.00-0.00   | 0-0 | 0.00-0.00  |
|          | Apr 26 to May 2, 2021  | 9  | 0-0  | 0.00-0.00   | 0-1 | 0.00-10.00 |
|          | May 3 to May 9, 2021   | 13 | 0-3  | 0.00-30.00  | 0-0 | 0.00-0.00  |
|          | May 10 to May 16, 2021 | 8  | 0-0  | 0.00-0.00   | 0-2 | 0.00-20.00 |
|          | May 17 to May 23, 2021 | 6  | 0-0  | 0.00-0.00   | 0-3 | 0.00-33.33 |
|          | May 24 to May 30, 2021 | 10 | 0-1  | 0.00-11.11  | 0-0 | 0.00-0.00  |
| Saitama  |                        |    |      |             |     |            |
|          | Apr 5 to Apr 11, 2021  | 30 | 0-7  | 0.00-30.43  | 0-0 | 0.00-0.00  |
|          | Apr 12 to Apr 18, 2021 | 24 | 0-1  | 0.00-4.35   | 0-0 | 0.00-0.00  |
|          | Apr 19 to Apr 25, 2021 | 20 | 0-0  | 0.00-0.00   | 0-2 | 0.00-9.09  |
|          | Apr 26 to May 2, 2021  | 37 | 4-14 | 17.39-60.87 | 0-0 | 0.00-0.00  |
|          | May 3 to May 9, 2021   | 25 | 0-2  | 0.00-8.70   | 0-0 | 0.00-0.00  |
|          | May 10 to May 16, 2021 | 26 | 0-2  | 0.00-8.33   | 0-0 | 0.00-0.00  |
|          | May 17 to May 23, 2021 | 37 | 1-12 | 4.00-48.00  | 0-0 | 0.00-0.00  |
|          | May 24 to May 30, 2021 | 31 | 0-7  | 0.00-29.17  | 0-0 | 0.00-0.00  |
| Chiba    |                        |    |      |             |     |            |
|          | Apr 5 to Apr 11, 2021  | 14 | 0-0  | 0.00-0.00   | 0-0 | 0.00-0.00  |
|          | Apr 12 to Apr 18, 2021 | 12 | 0-0  | 0.00-0.00   | 0-2 | 0.00-14.29 |
|          | Apr 19 to Apr 25, 2021 | 23 | 0-8  | 0.00-53.33  | 0-0 | 0.00-0.00  |
|          | Apr 26 to May 2, 2021  | 17 | 0-2  | 0.00-13.33  | 0-0 | 0.00-0.00  |
|          | May 3 to May 9, 2021   | 14 | 0-0  | 0.00-0.00   | 0-1 | 0.00-6.67  |
|          | May 10 to May 16, 2021 | 14 | 0-0  | 0.00-0.00   | 0-0 | 0.00-0.00  |
|          | May 17 to May 23, 2021 | 16 | 0-1  | 0.00-6.67   | 0-0 | 0.00-0.00  |
|          | May 24 to May 30, 2021 | 14 | 0-0  | 0.00-0.00   | 0-1 | 0.00-6.67  |
| Tokyo    |                        |    |      |             |     |            |
|          | Apr 5 to Apr 11, 2021  | 28 | 0-0  | 0.00-0.00   | 0-8 | 0.00-22.22 |
|          | Apr 12 to Apr 18, 2021 | 36 | 0-1  | 0.00-2.86   | 0-0 | 0.00-0.00  |
|          | Apr 19 to Apr 25, 2021 | 45 | 0-10 | 0.00-28.57  | 0-0 | 0.00-0.00  |
|          | Apr 26 to May 2, 2021  | 40 | 0-5  | 0.00-14.29  | 0-0 | 0.00-0.00  |
|          | May 3 to May 9, 2021   | 48 | 0-13 | 0.00-37.14  | 0-0 | 0.00-0.00  |
|          | May 10 to May 16, 2021 | 34 | 0-0  | 0.00-0.00   | 0-1 | 0.00-2.86  |
|          | May 17 to May 23, 2021 | 37 | 0-2  | 0.00-5.71   | 0-0 | 0.00-0.00  |
|          | May 24 to May 30, 2021 | 42 | 0-6  | 0.00-16.67  | 0-0 | 0.00-0.00  |
| Kanagawa |                        |    |      |             |     |            |
|          | Apr 5 to Apr 11, 2021  | 48 | 0-3  | 0.00-6.67   | 0-0 | 0.00-0.00  |
|          | Apr 12 to Apr 18, 2021 | 43 | 0-0  | 0.00-0.00   | 0-1 | 0.00-2.27  |
|          | Apr 19 to Apr 25, 2021 | 50 | 0-6  | 0.00-13.64  | 0-0 | 0.00-0.00  |
|          | Apr 26 to May 2, 2021  | 65 | 7-21 | 15.91-47.73 | 0-0 | 0.00-0.00  |
|          | May 3 to May 9, 2021   | 60 | 2-16 | 4.55-36.36  | 0-0 | 0.00-0.00  |
|          | May 10 to May 16, 2021 | 42 | 0-0  | 0.00-0.00   | 0-3 | 0.00-6.67  |
|          | May 17 to May 23, 2021 | 57 | 0-13 | 0.00-29.55  | 0-0 | 0.00-0.00  |

|                        |                        |     |            |               |           |             |
|------------------------|------------------------|-----|------------|---------------|-----------|-------------|
| Niigata                | May 24 to May 30, 2021 | 68  | 9-23       | 20.00-51.11   | 0-0       | 0.00-0.00   |
|                        | Apr 5 to Apr 11, 2021  | 9   | 0-2        | 0.00-28.57    | 0-0       | 0.00-0.00   |
|                        | Apr 12 to Apr 18, 2021 | 7   | 0-0        | 0.00-0.00     | 0-0       | 0.00-0.00   |
|                        | Apr 19 to Apr 25, 2021 | 8   | 0-0        | 0.00-0.00     | 0-0       | 0.00-0.00   |
|                        | Apr 26 to May 2, 2021  | 5   | 0-0        | 0.00-0.00     | 0-3       | 0.00-37.50  |
|                        | May 3 to May 9, 2021   | 9   | 0-2        | 0.00-28.57    | 0-0       | 0.00-0.00   |
|                        | May 10 to May 16, 2021 | 11  | 0-4        | 0.00-57.14    | 0-0       | 0.00-0.00   |
|                        | May 17 to May 23, 2021 | 4   | 0-0        | 0.00-0.00     | 0-3       | 0.00-42.86  |
| May 24 to May 30, 2021 | 8                      | 0-1 | 0.00-14.29 | 0-0           | 0.00-0.00 |             |
| Toyama                 | Apr 5 to Apr 11, 2021  | 6   | 0-2        | 0.00-50.00    | 0-0       | 0.00-0.00   |
|                        | Apr 12 to Apr 18, 2021 | 5   | 0-1        | 0.00-25.00    | 0-0       | 0.00-0.00   |
|                        | Apr 19 to Apr 25, 2021 | 4   | 0-0        | 0.00-0.00     | 0-1       | 0.00-20.00  |
|                        | Apr 26 to May 2, 2021  | 3   | 0-0        | 0.00-0.00     | 0-1       | 0.00-25.00  |
|                        | May 3 to May 9, 2021   | 5   | 0-1        | 0.00-25.00    | 0-0       | 0.00-0.00   |
|                        | May 10 to May 16, 2021 | 6   | 0-2        | 0.00-50.00    | 0-0       | 0.00-0.00   |
|                        | May 17 to May 23, 2021 | 4   | 0-0        | 0.00-0.00     | 0-0       | 0.00-0.00   |
|                        | May 24 to May 30, 2021 | 4   | 0-0        | 0.00-0.00     | 0-0       | 0.00-0.00   |
| Ishikawa               | Apr 5 to Apr 11, 2021  | 11  | 0-6        | 0.00-120.00   | 0-0       | 0.00-0.00   |
|                        | Apr 12 to Apr 18, 2021 | 3   | 0-0        | 0.00-0.00     | 0-2       | 0.00-40.00  |
|                        | Apr 19 to Apr 25, 2021 | 7   | 0-2        | 0.00-40.00    | 0-0       | 0.00-0.00   |
|                        | Apr 26 to May 2, 2021  | 4   | 0-0        | 0.00-0.00     | 0-1       | 0.00-20.00  |
|                        | May 3 to May 9, 2021   | 6   | 0-1        | 0.00-20.00    | 0-0       | 0.00-0.00   |
|                        | May 10 to May 16, 2021 | 1   | 0-0        | 0.00-0.00     | 1-5       | 16.67-83.33 |
|                        | May 17 to May 23, 2021 | 4   | 0-0        | 0.00-0.00     | 0-2       | 0.00-33.33  |
|                        | May 24 to May 30, 2021 | 4   | 0-0        | 0.00-0.00     | 0-2       | 0.00-33.33  |
| Fukui                  | Apr 5 to Apr 11, 2021  | 2   | 0-0        | 0.00-0.00     | 0-0       | 0.00-0.00   |
|                        | Apr 12 to Apr 18, 2021 | 1   | 0-0        | 0.00-0.00     | 0-1       | 0.00-50.00  |
|                        | Apr 19 to Apr 25, 2021 | 5   | 0-3        | 0.00-150.00   | 0-0       | 0.00-0.00   |
|                        | Apr 26 to May 2, 2021  | 4   | 0-2        | 0.00-100.00   | 0-0       | 0.00-0.00   |
|                        | May 3 to May 9, 2021   | 8   | 3-6        | 150.00-300.00 | 0-0       | 0.00-0.00   |
|                        | May 10 to May 16, 2021 | 0   | 0-0        | 0.00-0.00     | 0-2       | 0.00-100.00 |
|                        | May 17 to May 23, 2021 | 6   | 1-4        | 50.00-200.00  | 0-0       | 0.00-0.00   |
|                        | May 24 to May 30, 2021 | 2   | 0-0        | 0.00-0.00     | 0-0       | 0.00-0.00   |
| Yamanashi              | Apr 5 to Apr 11, 2021  | 3   | 0-1        | 0.00-50.00    | 0-0       | 0.00-0.00   |
|                        | Apr 12 to Apr 18, 2021 | 1   | 0-0        | 0.00-0.00     | 0-1       | 0.00-50.00  |
|                        | Apr 19 to Apr 25, 2021 | 4   | 0-1        | 0.00-33.33    | 0-0       | 0.00-0.00   |
|                        | Apr 26 to May 2, 2021  | 4   | 0-1        | 0.00-33.33    | 0-0       | 0.00-0.00   |
|                        | May 3 to May 9, 2021   | 2   | 0-0        | 0.00-0.00     | 0-1       | 0.00-33.33  |
|                        | May 10 to May 16, 2021 | 2   | 0-0        | 0.00-0.00     | 0-1       | 0.00-33.33  |
|                        | May 17 to May 23, 2021 | 5   | 0-3        | 0.00-150.00   | 0-0       | 0.00-0.00   |
|                        | May 24 to May 30, 2021 | 5   | 0-3        | 0.00-150.00   | 0-0       | 0.00-0.00   |

## Nagano

|                        |    |     |            |     |            |
|------------------------|----|-----|------------|-----|------------|
| Apr 5 to Apr 11, 2021  | 4  | 0-0 | 0.00-0.00  | 0-3 | 0.00-42.86 |
| Apr 12 to Apr 18, 2021 | 5  | 0-0 | 0.00-0.00  | 0-3 | 0.00-37.50 |
| Apr 19 to Apr 25, 2021 | 7  | 0-0 | 0.00-0.00  | 0-1 | 0.00-12.50 |
| Apr 26 to May 2, 2021  | 7  | 0-0 | 0.00-0.00  | 0-0 | 0.00-0.00  |
| May 3 to May 9, 2021   | 9  | 0-2 | 0.00-28.57 | 0-0 | 0.00-0.00  |
| May 10 to May 16, 2021 | 8  | 0-1 | 0.00-14.29 | 0-0 | 0.00-0.00  |
| May 17 to May 23, 2021 | 8  | 0-1 | 0.00-14.29 | 0-0 | 0.00-0.00  |
| May 24 to May 30, 2021 | 10 | 0-3 | 0.00-42.86 | 0-0 | 0.00-0.00  |

## Gifu

|                        |    |     |            |     |            |
|------------------------|----|-----|------------|-----|------------|
| Apr 5 to Apr 11, 2021  | 12 | 0-3 | 0.00-33.33 | 0-0 | 0.00-0.00  |
| Apr 12 to Apr 18, 2021 | 9  | 0-0 | 0.00-0.00  | 0-0 | 0.00-0.00  |
| Apr 19 to Apr 25, 2021 | 12 | 0-3 | 0.00-33.33 | 0-0 | 0.00-0.00  |
| Apr 26 to May 2, 2021  | 10 | 0-1 | 0.00-11.11 | 0-0 | 0.00-0.00  |
| May 3 to May 9, 2021   | 11 | 0-2 | 0.00-22.22 | 0-0 | 0.00-0.00  |
| May 10 to May 16, 2021 | 8  | 0-0 | 0.00-0.00  | 0-1 | 0.00-11.11 |
| May 17 to May 23, 2021 | 6  | 0-0 | 0.00-0.00  | 0-3 | 0.00-33.33 |
| May 24 to May 30, 2021 | 7  | 0-0 | 0.00-0.00  | 0-2 | 0.00-22.22 |

## Shizuoka

|                        |    |     |            |     |            |
|------------------------|----|-----|------------|-----|------------|
| Apr 5 to Apr 11, 2021  | 14 | 0-0 | 0.00-0.00  | 0-1 | 0.00-6.67  |
| Apr 12 to Apr 18, 2021 | 19 | 0-4 | 0.00-26.67 | 0-0 | 0.00-0.00  |
| Apr 19 to Apr 25, 2021 | 12 | 0-0 | 0.00-0.00  | 0-3 | 0.00-20.00 |
| Apr 26 to May 2, 2021  | 19 | 0-5 | 0.00-35.71 | 0-0 | 0.00-0.00  |
| May 3 to May 9, 2021   | 9  | 0-0 | 0.00-0.00  | 0-5 | 0.00-35.71 |
| May 10 to May 16, 2021 | 18 | 0-3 | 0.00-20.00 | 0-0 | 0.00-0.00  |
| May 17 to May 23, 2021 | 21 | 0-6 | 0.00-40.00 | 0-0 | 0.00-0.00  |
| May 24 to May 30, 2021 | 14 | 0-0 | 0.00-0.00  | 0-0 | 0.00-0.00  |

## Aichi

|                        |    |     |            |     |            |
|------------------------|----|-----|------------|-----|------------|
| Apr 5 to Apr 11, 2021  | 28 | 0-1 | 0.00-3.70  | 0-0 | 0.00-0.00  |
| Apr 12 to Apr 18, 2021 | 26 | 0-0 | 0.00-0.00  | 0-0 | 0.00-0.00  |
| Apr 19 to Apr 25, 2021 | 25 | 0-0 | 0.00-0.00  | 0-2 | 0.00-7.41  |
| Apr 26 to May 2, 2021  | 24 | 0-0 | 0.00-0.00  | 0-4 | 0.00-14.29 |
| May 3 to May 9, 2021   | 27 | 0-0 | 0.00-0.00  | 0-1 | 0.00-3.57  |
| May 10 to May 16, 2021 | 21 | 0-0 | 0.00-0.00  | 0-8 | 0.00-27.59 |
| May 17 to May 23, 2021 | 28 | 0-0 | 0.00-0.00  | 0-0 | 0.00-0.00  |
| May 24 to May 30, 2021 | 33 | 0-4 | 0.00-13.79 | 0-0 | 0.00-0.00  |

## Mie

|                        |    |     |             |     |            |
|------------------------|----|-----|-------------|-----|------------|
| Apr 5 to Apr 11, 2021  | 4  | 0-0 | 0.00-0.00   | 0-3 | 0.00-42.86 |
| Apr 12 to Apr 18, 2021 | 11 | 0-5 | 0.00-83.33  | 0-0 | 0.00-0.00  |
| Apr 19 to Apr 25, 2021 | 7  | 0-1 | 0.00-16.67  | 0-0 | 0.00-0.00  |
| Apr 26 to May 2, 2021  | 6  | 0-0 | 0.00-0.00   | 0-0 | 0.00-0.00  |
| May 3 to May 9, 2021   | 8  | 0-2 | 0.00-33.33  | 0-0 | 0.00-0.00  |
| May 10 to May 16, 2021 | 13 | 1-6 | 14.29-85.71 | 0-0 | 0.00-0.00  |
| May 17 to May 23, 2021 | 12 | 0-6 | 0.00-100.00 | 0-0 | 0.00-0.00  |
| May 24 to May 30, 2021 | 8  | 0-1 | 0.00-14.29  | 0-0 | 0.00-0.00  |

## Shiga

|          |                        |    |     |               |     |             |
|----------|------------------------|----|-----|---------------|-----|-------------|
|          | Apr 5 to Apr 11, 2021  | 6  | 0-3 | 0.00-100.00   | 0-0 | 0.00-0.00   |
|          | Apr 12 to Apr 18, 2021 | 5  | 0-2 | 0.00-66.67    | 0-0 | 0.00-0.00   |
|          | Apr 19 to Apr 25, 2021 | 3  | 0-0 | 0.00-0.00     | 0-0 | 0.00-0.00   |
|          | Apr 26 to May 2, 2021  | 5  | 0-2 | 0.00-66.67    | 0-0 | 0.00-0.00   |
|          | May 3 to May 9, 2021   | 0  | 0-0 | 0.00-0.00     | 0-3 | 0.00-100.00 |
|          | May 10 to May 16, 2021 | 4  | 0-2 | 0.00-100.00   | 0-0 | 0.00-0.00   |
|          | May 17 to May 23, 2021 | 2  | 0-0 | 0.00-0.00     | 0-0 | 0.00-0.00   |
|          | May 24 to May 30, 2021 | 5  | 0-3 | 0.00-150.00   | 0-0 | 0.00-0.00   |
| Kyoto    |                        |    |     |               |     |             |
|          | Apr 5 to Apr 11, 2021  | 7  | 0-2 | 0.00-40.00    | 0-0 | 0.00-0.00   |
|          | Apr 12 to Apr 18, 2021 | 5  | 0-1 | 0.00-25.00    | 0-0 | 0.00-0.00   |
|          | Apr 19 to Apr 25, 2021 | 9  | 0-4 | 0.00-80.00    | 0-0 | 0.00-0.00   |
|          | Apr 26 to May 2, 2021  | 7  | 0-2 | 0.00-40.00    | 0-0 | 0.00-0.00   |
|          | May 3 to May 9, 2021   | 4  | 0-0 | 0.00-0.00     | 0-1 | 0.00-20.00  |
|          | May 10 to May 16, 2021 | 11 | 2-6 | 40.00-120.00  | 0-0 | 0.00-0.00   |
|          | May 17 to May 23, 2021 | 3  | 0-0 | 0.00-0.00     | 0-2 | 0.00-40.00  |
|          | May 24 to May 30, 2021 | 11 | 1-6 | 20.00-120.00  | 0-0 | 0.00-0.00   |
| Osaka    |                        |    |     |               |     |             |
|          | Apr 5 to Apr 11, 2021  | 27 | 0-0 | 0.00-0.00     | 0-1 | 0.00-3.57   |
|          | Apr 12 to Apr 18, 2021 | 27 | 0-0 | 0.00-0.00     | 0-1 | 0.00-3.57   |
|          | Apr 19 to Apr 25, 2021 | 25 | 0-0 | 0.00-0.00     | 0-2 | 0.00-7.41   |
|          | Apr 26 to May 2, 2021  | 32 | 0-5 | 0.00-18.52    | 0-0 | 0.00-0.00   |
|          | May 3 to May 9, 2021   | 30 | 0-3 | 0.00-11.11    | 0-0 | 0.00-0.00   |
|          | May 10 to May 16, 2021 | 28 | 0-1 | 0.00-3.70     | 0-0 | 0.00-0.00   |
|          | May 17 to May 23, 2021 | 20 | 0-0 | 0.00-0.00     | 0-6 | 0.00-23.08  |
|          | May 24 to May 30, 2021 | 25 | 0-0 | 0.00-0.00     | 0-0 | 0.00-0.00   |
| Hyogo    |                        |    |     |               |     |             |
|          | Apr 5 to Apr 11, 2021  | 11 | 0-0 | 0.00-0.00     | 0-1 | 0.00-8.33   |
|          | Apr 12 to Apr 18, 2021 | 20 | 0-8 | 0.00-66.67    | 0-0 | 0.00-0.00   |
|          | Apr 19 to Apr 25, 2021 | 9  | 0-0 | 0.00-0.00     | 0-3 | 0.00-25.00  |
|          | Apr 26 to May 2, 2021  | 13 | 0-1 | 0.00-8.33     | 0-0 | 0.00-0.00   |
|          | May 3 to May 9, 2021   | 12 | 0-1 | 0.00-9.09     | 0-0 | 0.00-0.00   |
|          | May 10 to May 16, 2021 | 16 | 0-4 | 0.00-33.33    | 0-0 | 0.00-0.00   |
|          | May 17 to May 23, 2021 | 16 | 0-4 | 0.00-33.33    | 0-0 | 0.00-0.00   |
|          | May 24 to May 30, 2021 | 16 | 0-4 | 0.00-33.33    | 0-0 | 0.00-0.00   |
| Nara     |                        |    |     |               |     |             |
|          | Apr 5 to Apr 11, 2021  | 4  | 0-0 | 0.00-0.00     | 0-0 | 0.00-0.00   |
|          | Apr 12 to Apr 18, 2021 | 7  | 0-3 | 0.00-75.00    | 0-0 | 0.00-0.00   |
|          | Apr 19 to Apr 25, 2021 | 3  | 0-0 | 0.00-0.00     | 0-1 | 0.00-25.00  |
|          | Apr 26 to May 2, 2021  | 6  | 0-2 | 0.00-50.00    | 0-0 | 0.00-0.00   |
|          | May 3 to May 9, 2021   | 3  | 0-0 | 0.00-0.00     | 0-1 | 0.00-25.00  |
|          | May 10 to May 16, 2021 | 5  | 0-2 | 0.00-66.67    | 0-0 | 0.00-0.00   |
|          | May 17 to May 23, 2021 | 10 | 3-7 | 100.00-233.33 | 0-0 | 0.00-0.00   |
|          | May 24 to May 30, 2021 | 3  | 0-0 | 0.00-0.00     | 0-1 | 0.00-25.00  |
| Wakayama |                        |    |     |               |     |             |
|          | Apr 5 to Apr 11, 2021  | 8  | 0-4 | 0.00-100.00   | 0-0 | 0.00-0.00   |

|           |                        |    |     |             |     |             |
|-----------|------------------------|----|-----|-------------|-----|-------------|
|           | Apr 12 to Apr 18, 2021 | 3  | 0-0 | 0.00-0.00   | 0-1 | 0.00-25.00  |
|           | Apr 19 to Apr 25, 2021 | 5  | 0-1 | 0.00-25.00  | 0-0 | 0.00-0.00   |
|           | Apr 26 to May 2, 2021  | 6  | 0-2 | 0.00-50.00  | 0-0 | 0.00-0.00   |
|           | May 3 to May 9, 2021   | 8  | 0-4 | 0.00-100.00 | 0-0 | 0.00-0.00   |
|           | May 10 to May 16, 2021 | 8  | 0-4 | 0.00-100.00 | 0-0 | 0.00-0.00   |
|           | May 17 to May 23, 2021 | 7  | 0-3 | 0.00-75.00  | 0-0 | 0.00-0.00   |
|           | May 24 to May 30, 2021 | 2  | 0-0 | 0.00-0.00   | 0-2 | 0.00-50.00  |
| Tottori   |                        |    |     |             |     |             |
|           | Apr 5 to Apr 11, 2021  | 3  | 0-0 | 0.00-0.00   | 0-0 | 0.00-0.00   |
|           | Apr 12 to Apr 18, 2021 | 3  | 0-0 | 0.00-0.00   | 0-0 | 0.00-0.00   |
|           | Apr 19 to Apr 25, 2021 | 3  | 0-1 | 0.00-50.00  | 0-0 | 0.00-0.00   |
|           | Apr 26 to May 2, 2021  | 3  | 0-1 | 0.00-50.00  | 0-0 | 0.00-0.00   |
|           | May 3 to May 9, 2021   | 4  | 0-2 | 0.00-100.00 | 0-0 | 0.00-0.00   |
|           | May 10 to May 16, 2021 | 0  | 0-0 | 0.00-0.00   | 0-2 | 0.00-100.00 |
|           | May 17 to May 23, 2021 | 0  | 0-0 | 0.00-0.00   | 0-2 | 0.00-100.00 |
|           | May 24 to May 30, 2021 | 6  | 0-4 | 0.00-200.00 | 0-0 | 0.00-0.00   |
| Shimane   |                        |    |     |             |     |             |
|           | Apr 5 to Apr 11, 2021  | 2  | 0-0 | 0.00-0.00   | 0-1 | 0.00-33.33  |
|           | Apr 12 to Apr 18, 2021 | 0  | 0-0 | 0.00-0.00   | 0-3 | 0.00-100.00 |
|           | Apr 19 to Apr 25, 2021 | 7  | 0-4 | 0.00-133.33 | 0-0 | 0.00-0.00   |
|           | Apr 26 to May 2, 2021  | 2  | 0-0 | 0.00-0.00   | 0-1 | 0.00-33.33  |
|           | May 3 to May 9, 2021   | 4  | 0-1 | 0.00-33.33  | 0-0 | 0.00-0.00   |
|           | May 10 to May 16, 2021 | 3  | 0-0 | 0.00-0.00   | 0-0 | 0.00-0.00   |
|           | May 17 to May 23, 2021 | 3  | 0-0 | 0.00-0.00   | 0-0 | 0.00-0.00   |
|           | May 24 to May 30, 2021 | 4  | 0-1 | 0.00-33.33  | 0-0 | 0.00-0.00   |
| Okayama   |                        |    |     |             |     |             |
|           | Apr 5 to Apr 11, 2021  | 1  | 0-0 | 0.00-0.00   | 0-4 | 0.00-80.00  |
|           | Apr 12 to Apr 18, 2021 | 3  | 0-0 | 0.00-0.00   | 0-2 | 0.00-40.00  |
|           | Apr 19 to Apr 25, 2021 | 4  | 0-0 | 0.00-0.00   | 0-2 | 0.00-33.33  |
|           | Apr 26 to May 2, 2021  | 8  | 0-2 | 0.00-33.33  | 0-0 | 0.00-0.00   |
|           | May 3 to May 9, 2021   | 10 | 0-4 | 0.00-66.67  | 0-0 | 0.00-0.00   |
|           | May 10 to May 16, 2021 | 7  | 0-1 | 0.00-16.67  | 0-0 | 0.00-0.00   |
|           | May 17 to May 23, 2021 | 8  | 0-3 | 0.00-60.00  | 0-0 | 0.00-0.00   |
|           | May 24 to May 30, 2021 | 6  | 0-1 | 0.00-20.00  | 0-0 | 0.00-0.00   |
| Hiroshima |                        |    |     |             |     |             |
|           | Apr 5 to Apr 11, 2021  | 6  | 0-0 | 0.00-0.00   | 0-1 | 0.00-14.29  |
|           | Apr 12 to Apr 18, 2021 | 11 | 0-5 | 0.00-83.33  | 0-0 | 0.00-0.00   |
|           | Apr 19 to Apr 25, 2021 | 8  | 0-2 | 0.00-33.33  | 0-0 | 0.00-0.00   |
|           | Apr 26 to May 2, 2021  | 7  | 0-1 | 0.00-16.67  | 0-0 | 0.00-0.00   |
|           | May 3 to May 9, 2021   | 6  | 0-0 | 0.00-0.00   | 0-0 | 0.00-0.00   |
|           | May 10 to May 16, 2021 | 7  | 0-1 | 0.00-16.67  | 0-0 | 0.00-0.00   |
|           | May 17 to May 23, 2021 | 10 | 0-4 | 0.00-66.67  | 0-0 | 0.00-0.00   |
|           | May 24 to May 30, 2021 | 5  | 0-0 | 0.00-0.00   | 0-1 | 0.00-16.67  |
| Yamaguchi |                        |    |     |             |     |             |
|           | Apr 5 to Apr 11, 2021  | 2  | 0-0 | 0.00-0.00   | 0-2 | 0.00-50.00  |
|           | Apr 12 to Apr 18, 2021 | 1  | 0-0 | 0.00-0.00   | 0-3 | 0.00-75.00  |

|           |                        |    |      |               |     |             |
|-----------|------------------------|----|------|---------------|-----|-------------|
|           | Apr 19 to Apr 25, 2021 | 5  | 0-1  | 0.00-25.00    | 0-0 | 0.00-0.00   |
|           | Apr 26 to May 2, 2021  | 6  | 0-2  | 0.00-50.00    | 0-0 | 0.00-0.00   |
|           | May 3 to May 9, 2021   | 5  | 0-1  | 0.00-25.00    | 0-0 | 0.00-0.00   |
|           | May 10 to May 16, 2021 | 10 | 2-6  | 50.00-150.00  | 0-0 | 0.00-0.00   |
|           | May 17 to May 23, 2021 | 4  | 0-0  | 0.00-0.00     | 0-0 | 0.00-0.00   |
|           | May 24 to May 30, 2021 | 4  | 0-0  | 0.00-0.00     | 0-0 | 0.00-0.00   |
| Tokushima |                        |    |      |               |     |             |
|           | Apr 5 to Apr 11, 2021  | 2  | 0-0  | 0.00-0.00     | 0-0 | 0.00-0.00   |
|           | Apr 12 to Apr 18, 2021 | 0  | NA   | NA            | NA  | NA          |
|           | Apr 19 to Apr 25, 2021 | 2  | NA   | NA            | NA  | NA          |
|           | Apr 26 to May 2, 2021  | 2  | 0-0  | 0.00-0.00     | 0-0 | 0.00-0.00   |
|           | May 3 to May 9, 2021   | 0  | NA   | NA            | NA  | NA          |
|           | May 10 to May 16, 2021 | 1  | 0-0  | 0.00-0.00     | 0-1 | 0.00-50.00  |
|           | May 17 to May 23, 2021 | 1  | NA   | NA            | NA  | NA          |
|           | May 24 to May 30, 2021 | 2  | NA   | NA            | NA  | NA          |
| Kagawa    |                        |    |      |               |     |             |
|           | Apr 5 to Apr 11, 2021  | 3  | 0-0  | 0.00-0.00     | 0-1 | 0.00-25.00  |
|           | Apr 12 to Apr 18, 2021 | 4  | 0-0  | 0.00-0.00     | 0-0 | 0.00-0.00   |
|           | Apr 19 to Apr 25, 2021 | 4  | 0-0  | 0.00-0.00     | 0-0 | 0.00-0.00   |
|           | Apr 26 to May 2, 2021  | 1  | 0-0  | 0.00-0.00     | 0-3 | 0.00-75.00  |
|           | May 3 to May 9, 2021   | 6  | 0-2  | 0.00-50.00    | 0-0 | 0.00-0.00   |
|           | May 10 to May 16, 2021 | 5  | 0-1  | 0.00-25.00    | 0-0 | 0.00-0.00   |
|           | May 17 to May 23, 2021 | 3  | 0-0  | 0.00-0.00     | 0-1 | 0.00-25.00  |
|           | May 24 to May 30, 2021 | 7  | 0-3  | 0.00-75.00    | 0-0 | 0.00-0.00   |
| Ehime     |                        |    |      |               |     |             |
|           | Apr 5 to Apr 11, 2021  | 4  | 0-0  | 0.00-0.00     | 0-1 | 0.00-20.00  |
|           | Apr 12 to Apr 18, 2021 | 2  | 0-0  | 0.00-0.00     | 0-3 | 0.00-60.00  |
|           | Apr 19 to Apr 25, 2021 | 6  | 0-1  | 0.00-20.00    | 0-0 | 0.00-0.00   |
|           | Apr 26 to May 2, 2021  | 4  | 0-0  | 0.00-0.00     | 0-1 | 0.00-20.00  |
|           | May 3 to May 9, 2021   | 2  | 0-0  | 0.00-0.00     | 0-3 | 0.00-60.00  |
|           | May 10 to May 16, 2021 | 6  | 0-2  | 0.00-50.00    | 0-0 | 0.00-0.00   |
|           | May 17 to May 23, 2021 | 5  | 0-1  | 0.00-25.00    | 0-0 | 0.00-0.00   |
|           | May 24 to May 30, 2021 | 7  | 0-3  | 0.00-75.00    | 0-0 | 0.00-0.00   |
| Kochi     |                        |    |      |               |     |             |
|           | Apr 5 to Apr 11, 2021  | 1  | NA   | NA            | NA  | NA          |
|           | Apr 12 to Apr 18, 2021 | 5  | 1-4  | 100.00-400.00 | 0-0 | 0.00-0.00   |
|           | Apr 19 to Apr 25, 2021 | 1  | 0-0  | 0.00-0.00     | 0-0 | 0.00-0.00   |
|           | Apr 26 to May 2, 2021  | 2  | 0-1  | 0.00-100.00   | 0-0 | 0.00-0.00   |
|           | May 3 to May 9, 2021   | 0  | 0-0  | 0.00-0.00     | 0-1 | 0.00-100.00 |
|           | May 10 to May 16, 2021 | 4  | 0-3  | 0.00-300.00   | 0-0 | 0.00-0.00   |
|           | May 17 to May 23, 2021 | 4  | 0-3  | 0.00-300.00   | 0-0 | 0.00-0.00   |
|           | May 24 to May 30, 2021 | 0  | 0-0  | 0.00-0.00     | 0-2 | 0.00-100.00 |
| Fukuoka   |                        |    |      |               |     |             |
|           | Apr 5 to Apr 11, 2021  | 12 | 0-1  | 0.00-9.09     | 0-0 | 0.00-0.00   |
|           | Apr 12 to Apr 18, 2021 | 18 | 1-8  | 10.00-80.00   | 0-0 | 0.00-0.00   |
|           | Apr 19 to Apr 25, 2021 | 21 | 4-11 | 40.00-110.00  | 0-0 | 0.00-0.00   |



|          |                        |    |     |              |     |            |
|----------|------------------------|----|-----|--------------|-----|------------|
|          | Apr 26 to May 2, 2021  | 14 | 0-4 | 0.00-40.00   | 0-0 | 0.00-0.00  |
|          | May 3 to May 9, 2021   | 11 | 0-1 | 0.00-10.00   | 0-0 | 0.00-0.00  |
|          | May 10 to May 16, 2021 | 11 | 0-0 | 0.00-0.00    | 0-0 | 0.00-0.00  |
|          | May 17 to May 23, 2021 | 18 | 1-7 | 9.09-63.64   | 0-0 | 0.00-0.00  |
|          | May 24 to May 30, 2021 | 16 | 0-5 | 0.00-45.45   | 0-0 | 0.00-0.00  |
| Saga     |                        |    |     |              |     |            |
|          | Apr 5 to Apr 11, 2021  | 1  | 0-0 | 0.00-0.00    | 0-2 | 0.00-66.67 |
|          | Apr 12 to Apr 18, 2021 | 2  | 0-0 | 0.00-0.00    | 0-1 | 0.00-33.33 |
|          | Apr 19 to Apr 25, 2021 | 3  | 0-0 | 0.00-0.00    | 0-0 | 0.00-0.00  |
|          | Apr 26 to May 2, 2021  | 4  | 0-1 | 0.00-33.33   | 0-0 | 0.00-0.00  |
|          | May 3 to May 9, 2021   | 5  | 0-2 | 0.00-66.67   | 0-0 | 0.00-0.00  |
|          | May 10 to May 16, 2021 | 2  | 0-0 | 0.00-0.00    | 0-1 | 0.00-33.33 |
|          | May 17 to May 23, 2021 | 4  | 0-1 | 0.00-33.33   | 0-0 | 0.00-0.00  |
|          | May 24 to May 30, 2021 | 6  | 0-4 | 0.00-200.00  | 0-0 | 0.00-0.00  |
| Nagasaki |                        |    |     |              |     |            |
|          | Apr 5 to Apr 11, 2021  | 3  | 0-0 | 0.00-0.00    | 0-0 | 0.00-0.00  |
|          | Apr 12 to Apr 18, 2021 | 2  | 0-0 | 0.00-0.00    | 0-1 | 0.00-33.33 |
|          | Apr 19 to Apr 25, 2021 | 4  | 0-1 | 0.00-33.33   | 0-0 | 0.00-0.00  |
|          | Apr 26 to May 2, 2021  | 5  | 0-1 | 0.00-25.00   | 0-0 | 0.00-0.00  |
|          | May 3 to May 9, 2021   | 2  | 0-0 | 0.00-0.00    | 0-2 | 0.00-50.00 |
|          | May 10 to May 16, 2021 | 7  | 0-3 | 0.00-75.00   | 0-0 | 0.00-0.00  |
|          | May 17 to May 23, 2021 | 4  | 0-0 | 0.00-0.00    | 0-0 | 0.00-0.00  |
|          | May 24 to May 30, 2021 | 7  | 0-3 | 0.00-75.00   | 0-0 | 0.00-0.00  |
| Kumamoto |                        |    |     |              |     |            |
|          | Apr 5 to Apr 11, 2021  | 5  | 0-1 | 0.00-25.00   | 0-0 | 0.00-0.00  |
|          | Apr 12 to Apr 18, 2021 | 5  | 0-1 | 0.00-25.00   | 0-0 | 0.00-0.00  |
|          | Apr 19 to Apr 25, 2021 | 4  | 0-0 | 0.00-0.00    | 0-0 | 0.00-0.00  |
|          | Apr 26 to May 2, 2021  | 9  | 1-5 | 25.00-125.00 | 0-0 | 0.00-0.00  |
|          | May 3 to May 9, 2021   | 6  | 0-2 | 0.00-50.00   | 0-0 | 0.00-0.00  |
|          | May 10 to May 16, 2021 | 6  | 0-2 | 0.00-50.00   | 0-0 | 0.00-0.00  |
|          | May 17 to May 23, 2021 | 2  | 0-0 | 0.00-0.00    | 0-2 | 0.00-50.00 |
|          | May 24 to May 30, 2021 | 6  | 0-2 | 0.00-50.00   | 0-0 | 0.00-0.00  |
| Oita     |                        |    |     |              |     |            |
|          | Apr 5 to Apr 11, 2021  | 3  | 0-0 | 0.00-0.00    | 0-2 | 0.00-40.00 |
|          | Apr 12 to Apr 18, 2021 | 13 | 3-8 | 60.00-160.00 | 0-0 | 0.00-0.00  |
|          | Apr 19 to Apr 25, 2021 | 4  | 0-0 | 0.00-0.00    | 0-1 | 0.00-20.00 |
|          | Apr 26 to May 2, 2021  | 4  | 0-0 | 0.00-0.00    | 0-1 | 0.00-20.00 |
|          | May 3 to May 9, 2021   | 13 | 3-8 | 60.00-160.00 | 0-0 | 0.00-0.00  |
|          | May 10 to May 16, 2021 | 5  | 0-0 | 0.00-0.00    | 0-0 | 0.00-0.00  |
|          | May 17 to May 23, 2021 | 5  | 0-0 | 0.00-0.00    | 0-1 | 0.00-16.67 |
|          | May 24 to May 30, 2021 | 5  | 0-0 | 0.00-0.00    | 0-1 | 0.00-16.67 |
| Miyazaki |                        |    |     |              |     |            |
|          | Apr 5 to Apr 11, 2021  | 4  | 0-0 | 0.00-0.00    | 0-1 | 0.00-20.00 |
|          | Apr 12 to Apr 18, 2021 | 4  | 0-0 | 0.00-0.00    | 0-1 | 0.00-20.00 |
|          | Apr 19 to Apr 25, 2021 | 2  | 0-0 | 0.00-0.00    | 0-3 | 0.00-60.00 |
|          | Apr 26 to May 2, 2021  | 3  | 0-0 | 0.00-0.00    | 0-2 | 0.00-40.00 |

|           |                        |    |     |            |     |            |
|-----------|------------------------|----|-----|------------|-----|------------|
|           | May 3 to May 9, 2021   | 4  | 0-0 | 0.00-0.00  | 0-1 | 0.00-20.00 |
|           | May 10 to May 16, 2021 | 4  | 0-0 | 0.00-0.00  | 0-1 | 0.00-20.00 |
|           | May 17 to May 23, 2021 | 9  | 0-4 | 0.00-80.00 | 0-0 | 0.00-0.00  |
|           | May 24 to May 30, 2021 | 2  | 0-0 | 0.00-0.00  | 0-3 | 0.00-60.00 |
| Kagoshima |                        |    |     |            |     |            |
|           | Apr 5 to Apr 11, 2021  | 4  | 0-0 | 0.00-0.00  | 0-1 | 0.00-20.00 |
|           | Apr 12 to Apr 18, 2021 | 8  | 0-3 | 0.00-60.00 | 0-0 | 0.00-0.00  |
|           | Apr 19 to Apr 25, 2021 | 8  | 0-3 | 0.00-60.00 | 0-0 | 0.00-0.00  |
|           | Apr 26 to May 2, 2021  | 4  | 0-0 | 0.00-0.00  | 0-1 | 0.00-20.00 |
|           | May 3 to May 9, 2021   | 4  | 0-0 | 0.00-0.00  | 0-1 | 0.00-20.00 |
|           | May 10 to May 16, 2021 | 3  | 0-0 | 0.00-0.00  | 0-3 | 0.00-50.00 |
|           | May 17 to May 23, 2021 | 11 | 0-5 | 0.00-83.33 | 0-0 | 0.00-0.00  |
|           | May 24 to May 30, 2021 | 6  | 0-0 | 0.00-0.00  | 0-0 | 0.00-0.00  |
| Okinawa   |                        |    |     |            |     |            |
|           | Apr 5 to Apr 11, 2021  | 3  | 0-0 | 0.00-0.00  | 0-0 | 0.00-0.00  |
|           | Apr 12 to Apr 18, 2021 | 3  | 0-0 | 0.00-0.00  | 0-0 | 0.00-0.00  |
|           | Apr 19 to Apr 25, 2021 | 2  | 0-0 | 0.00-0.00  | 0-1 | 0.00-33.33 |
|           | Apr 26 to May 2, 2021  | 2  | 0-0 | 0.00-0.00  | 0-1 | 0.00-33.33 |
|           | May 3 to May 9, 2021   | 5  | 0-2 | 0.00-66.67 | 0-0 | 0.00-0.00  |
|           | May 10 to May 16, 2021 | 2  | 0-0 | 0.00-0.00  | 0-1 | 0.00-33.33 |
|           | May 17 to May 23, 2021 | 2  | 0-0 | 0.00-0.00  | 0-1 | 0.00-33.33 |
|           | May 24 to May 30, 2021 | 4  | 0-0 | 0.00-0.00  | 0-0 | 0.00-0.00  |

---

**Table A.16: Weekly number of observed and excess/exiguous deaths in Japan and 47 prefectures for malignant neoplasms-related deaths at homes from January 2020 through May 2021.**

| Prefecture | Week                   | Observed | Excess deaths | Percent excess | Exiguous deaths | Percent exiguous |
|------------|------------------------|----------|---------------|----------------|-----------------|------------------|
| Japan      |                        |          |               |                |                 |                  |
|            | Apr 5 to Apr 11, 2021  | 1531     | 162–369       | 13.94–31.76    | 0–0             | 0.00–0.00        |
|            | Apr 12 to Apr 18, 2021 | 1576     | 204–412       | 17.53–35.40    | 0–0             | 0.00–0.00        |
|            | Apr 19 to Apr 25, 2021 | 1617     | 234–442       | 19.91–37.62    | 0–0             | 0.00–0.00        |
|            | Apr 26 to May 2, 2021  | 1703     | 294–511       | 24.66–42.87    | 0–0             | 0.00–0.00        |
|            | May 3 to May 9, 2021   | 1602     | 187–405       | 15.62–33.83    | 0–0             | 0.00–0.00        |
|            | May 10 to May 16, 2021 | 1589     | 145–370       | 11.89–30.35    | 0–0             | 0.00–0.00        |
|            | May 17 to May 23, 2021 | 1490     | 39–267        | 3.19–21.83     | 0–0             | 0.00–0.00        |
|            | May 24 to May 30, 2021 | 1546     | 78–309        | 6.31–24.98     | 0–0             | 0.00–0.00        |
| Hokkaido   |                        |          |               |                |                 |                  |
|            | Apr 5 to Apr 11, 2021  | 45       | 0–6           | 0.00–15.38     | 0–0             | 0.00–0.00        |
|            | Apr 12 to Apr 18, 2021 | 52       | 0–13          | 0.00–33.33     | 0–0             | 0.00–0.00        |
|            | Apr 19 to Apr 25, 2021 | 43       | 0–3           | 0.00–7.50      | 0–0             | 0.00–0.00        |
|            | Apr 26 to May 2, 2021  | 64       | 9–23          | 21.95–56.10    | 0–0             | 0.00–0.00        |
|            | May 3 to May 9, 2021   | 48       | 0–8           | 0.00–20.00     | 0–0             | 0.00–0.00        |
|            | May 10 to May 16, 2021 | 53       | 0–13          | 0.00–32.50     | 0–0             | 0.00–0.00        |
|            | May 17 to May 23, 2021 | 44       | 0–3           | 0.00–7.32      | 0–0             | 0.00–0.00        |
|            | May 24 to May 30, 2021 | 67       | 11–26         | 26.83–63.41    | 0–0             | 0.00–0.00        |
| Aomori     |                        |          |               |                |                 |                  |
|            | Apr 5 to Apr 11, 2021  | 6        | 0–0           | 0.00–0.00      | 0–3             | 0.00–33.33       |
|            | Apr 12 to Apr 18, 2021 | 6        | 0–0           | 0.00–0.00      | 0–3             | 0.00–33.33       |
|            | Apr 19 to Apr 25, 2021 | 12       | 0–3           | 0.00–33.33     | 0–0             | 0.00–0.00        |
|            | Apr 26 to May 2, 2021  | 11       | 0–2           | 0.00–22.22     | 0–0             | 0.00–0.00        |
|            | May 3 to May 9, 2021   | 5        | 0–0           | 0.00–0.00      | 0–4             | 0.00–44.44       |
|            | May 10 to May 16, 2021 | 8        | 0–0           | 0.00–0.00      | 0–1             | 0.00–11.11       |
|            | May 17 to May 23, 2021 | 7        | 0–0           | 0.00–0.00      | 0–2             | 0.00–22.22       |
|            | May 24 to May 30, 2021 | 13       | 0–3           | 0.00–30.00     | 0–0             | 0.00–0.00        |
| Iwate      |                        |          |               |                |                 |                  |
|            | Apr 5 to Apr 11, 2021  | 5        | 0–0           | 0.00–0.00      | 0–2             | 0.00–28.57       |
|            | Apr 12 to Apr 18, 2021 | 9        | 0–2           | 0.00–28.57     | 0–0             | 0.00–0.00        |
|            | Apr 19 to Apr 25, 2021 | 12       | 1–6           | 16.67–100.00   | 0–0             | 0.00–0.00        |
|            | Apr 26 to May 2, 2021  | 14       | 3–8           | 50.00–133.33   | 0–0             | 0.00–0.00        |
|            | May 3 to May 9, 2021   | 6        | 0–0           | 0.00–0.00      | 0–0             | 0.00–0.00        |
|            | May 10 to May 16, 2021 | 9        | 0–3           | 0.00–50.00     | 0–0             | 0.00–0.00        |
|            | May 17 to May 23, 2021 | 7        | 0–1           | 0.00–16.67     | 0–0             | 0.00–0.00        |
|            | May 24 to May 30, 2021 | 9        | 0–3           | 0.00–50.00     | 0–0             | 0.00–0.00        |
| Miyagi     |                        |          |               |                |                 |                  |
|            | Apr 5 to Apr 11, 2021  | 32       | 0–10          | 0.00–45.45     | 0–0             | 0.00–0.00        |
|            | Apr 12 to Apr 18, 2021 | 34       | 2–12          | 9.09–54.55     | 0–0             | 0.00–0.00        |
|            | Apr 19 to Apr 25, 2021 | 32       | 1–10          | 4.55–45.45     | 0–0             | 0.00–0.00        |
|            | Apr 26 to May 2, 2021  | 36       | 4–14          | 18.18–63.64    | 0–0             | 0.00–0.00        |
|            | May 3 to May 9, 2021   | 29       | 0–6           | 0.00–26.09     | 0–0             | 0.00–0.00        |

|           |                        |    |       |              |     |            |
|-----------|------------------------|----|-------|--------------|-----|------------|
|           | May 10 to May 16, 2021 | 23 | 0-1   | 0.00-4.55    | 0-0 | 0.00-0.00  |
|           | May 17 to May 23, 2021 | 24 | 0-2   | 0.00-9.09    | 0-0 | 0.00-0.00  |
|           | May 24 to May 30, 2021 | 28 | 0-5   | 0.00-21.74   | 0-0 | 0.00-0.00  |
| Akita     |                        |    |       |              |     |            |
|           | Apr 5 to Apr 11, 2021  | 9  | 1-5   | 25.00-125.00 | 0-0 | 0.00-0.00  |
|           | Apr 12 to Apr 18, 2021 | 7  | 0-3   | 0.00-75.00   | 0-0 | 0.00-0.00  |
|           | Apr 19 to Apr 25, 2021 | 9  | 0-5   | 0.00-125.00  | 0-0 | 0.00-0.00  |
|           | Apr 26 to May 2, 2021  | 5  | 0-1   | 0.00-25.00   | 0-0 | 0.00-0.00  |
|           | May 3 to May 9, 2021   | 6  | 0-2   | 0.00-50.00   | 0-0 | 0.00-0.00  |
|           | May 10 to May 16, 2021 | 5  | 0-1   | 0.00-25.00   | 0-0 | 0.00-0.00  |
|           | May 17 to May 23, 2021 | 5  | 0-1   | 0.00-25.00   | 0-0 | 0.00-0.00  |
|           | May 24 to May 30, 2021 | 5  | 0-1   | 0.00-25.00   | 0-0 | 0.00-0.00  |
| Yamagata  |                        |    |       |              |     |            |
|           | Apr 5 to Apr 11, 2021  | 11 | 0-0   | 0.00-0.00    | 0-1 | 0.00-8.33  |
|           | Apr 12 to Apr 18, 2021 | 10 | 0-0   | 0.00-0.00    | 0-3 | 0.00-23.08 |
|           | Apr 19 to Apr 25, 2021 | 21 | 0-8   | 0.00-61.54   | 0-0 | 0.00-0.00  |
|           | Apr 26 to May 2, 2021  | 28 | 7-15  | 53.85-115.38 | 0-0 | 0.00-0.00  |
|           | May 3 to May 9, 2021   | 15 | 0-2   | 0.00-15.38   | 0-0 | 0.00-0.00  |
|           | May 10 to May 16, 2021 | 21 | 0-7   | 0.00-50.00   | 0-0 | 0.00-0.00  |
|           | May 17 to May 23, 2021 | 20 | 0-6   | 0.00-42.86   | 0-0 | 0.00-0.00  |
|           | May 24 to May 30, 2021 | 17 | 0-4   | 0.00-30.77   | 0-0 | 0.00-0.00  |
| Fukushima |                        |    |       |              |     |            |
|           | Apr 5 to Apr 11, 2021  | 17 | 0-4   | 0.00-30.77   | 0-0 | 0.00-0.00  |
|           | Apr 12 to Apr 18, 2021 | 32 | 11-19 | 84.62-146.15 | 0-0 | 0.00-0.00  |
|           | Apr 19 to Apr 25, 2021 | 16 | 0-2   | 0.00-14.29   | 0-0 | 0.00-0.00  |
|           | Apr 26 to May 2, 2021  | 28 | 6-14  | 42.86-100.00 | 0-0 | 0.00-0.00  |
|           | May 3 to May 9, 2021   | 24 | 2-10  | 14.29-71.43  | 0-0 | 0.00-0.00  |
|           | May 10 to May 16, 2021 | 20 | 0-5   | 0.00-33.33   | 0-0 | 0.00-0.00  |
|           | May 17 to May 23, 2021 | 21 | 0-7   | 0.00-50.00   | 0-0 | 0.00-0.00  |
|           | May 24 to May 30, 2021 | 16 | 0-1   | 0.00-6.67    | 0-0 | 0.00-0.00  |
| Ibaraki   |                        |    |       |              |     |            |
|           | Apr 5 to Apr 11, 2021  | 26 | 0-5   | 0.00-23.81   | 0-0 | 0.00-0.00  |
|           | Apr 12 to Apr 18, 2021 | 41 | 10-20 | 47.62-95.24  | 0-0 | 0.00-0.00  |
|           | Apr 19 to Apr 25, 2021 | 38 | 6-16  | 27.27-72.73  | 0-0 | 0.00-0.00  |
|           | Apr 26 to May 2, 2021  | 32 | 0-10  | 0.00-45.45   | 0-0 | 0.00-0.00  |
|           | May 3 to May 9, 2021   | 28 | 0-6   | 0.00-27.27   | 0-0 | 0.00-0.00  |
|           | May 10 to May 16, 2021 | 33 | 1-11  | 4.55-50.00   | 0-0 | 0.00-0.00  |
|           | May 17 to May 23, 2021 | 21 | 0-0   | 0.00-0.00    | 0-1 | 0.00-4.55  |
|           | May 24 to May 30, 2021 | 31 | 0-9   | 0.00-40.91   | 0-0 | 0.00-0.00  |
| Tochigi   |                        |    |       |              |     |            |
|           | Apr 5 to Apr 11, 2021  | 22 | 0-3   | 0.00-15.79   | 0-0 | 0.00-0.00  |
|           | Apr 12 to Apr 18, 2021 | 22 | 0-3   | 0.00-15.79   | 0-0 | 0.00-0.00  |
|           | Apr 19 to Apr 25, 2021 | 20 | 0-1   | 0.00-5.26    | 0-0 | 0.00-0.00  |
|           | Apr 26 to May 2, 2021  | 34 | 7-16  | 38.89-88.89  | 0-0 | 0.00-0.00  |
|           | May 3 to May 9, 2021   | 31 | 4-13  | 22.22-72.22  | 0-0 | 0.00-0.00  |
|           | May 10 to May 16, 2021 | 20 | 0-1   | 0.00-5.26    | 0-0 | 0.00-0.00  |

|          |                        |     |       |             |     |            |
|----------|------------------------|-----|-------|-------------|-----|------------|
|          | May 17 to May 23, 2021 | 13  | 0-0   | 0.00-0.00   | 0-6 | 0.00-31.58 |
|          | May 24 to May 30, 2021 | 30  | 1-10  | 5.00-50.00  | 0-0 | 0.00-0.00  |
| Gunma    |                        |     |       |             |     |            |
|          | Apr 5 to Apr 11, 2021  | 20  | 0-1   | 0.00-5.26   | 0-0 | 0.00-0.00  |
|          | Apr 12 to Apr 18, 2021 | 24  | 0-4   | 0.00-20.00  | 0-0 | 0.00-0.00  |
|          | Apr 19 to Apr 25, 2021 | 25  | 0-5   | 0.00-25.00  | 0-0 | 0.00-0.00  |
|          | Apr 26 to May 2, 2021  | 21  | 0-0   | 0.00-0.00   | 0-0 | 0.00-0.00  |
|          | May 3 to May 9, 2021   | 17  | 0-0   | 0.00-0.00   | 0-4 | 0.00-19.05 |
|          | May 10 to May 16, 2021 | 24  | 0-2   | 0.00-9.09   | 0-0 | 0.00-0.00  |
|          | May 17 to May 23, 2021 | 15  | 0-0   | 0.00-0.00   | 0-7 | 0.00-31.82 |
|          | May 24 to May 30, 2021 | 19  | 0-0   | 0.00-0.00   | 0-3 | 0.00-13.64 |
| Saitama  |                        |     |       |             |     |            |
|          | Apr 5 to Apr 11, 2021  | 97  | 1-23  | 1.35-31.08  | 0-0 | 0.00-0.00  |
|          | Apr 12 to Apr 18, 2021 | 93  | 0-20  | 0.00-27.40  | 0-0 | 0.00-0.00  |
|          | Apr 19 to Apr 25, 2021 | 93  | 0-19  | 0.00-25.68  | 0-0 | 0.00-0.00  |
|          | Apr 26 to May 2, 2021  | 88  | 0-10  | 0.00-12.82  | 0-0 | 0.00-0.00  |
|          | May 3 to May 9, 2021   | 93  | 0-13  | 0.00-16.25  | 0-0 | 0.00-0.00  |
|          | May 10 to May 16, 2021 | 97  | 0-17  | 0.00-21.25  | 0-0 | 0.00-0.00  |
|          | May 17 to May 23, 2021 | 106 | 4-28  | 5.13-35.90  | 0-0 | 0.00-0.00  |
|          | May 24 to May 30, 2021 | 85  | 0-6   | 0.00-7.59   | 0-0 | 0.00-0.00  |
| Chiba    |                        |     |       |             |     |            |
|          | Apr 5 to Apr 11, 2021  | 86  | 11-29 | 19.30-50.88 | 0-0 | 0.00-0.00  |
|          | Apr 12 to Apr 18, 2021 | 101 | 25-43 | 43.10-74.14 | 0-0 | 0.00-0.00  |
|          | Apr 19 to Apr 25, 2021 | 81  | 5-23  | 8.62-39.66  | 0-0 | 0.00-0.00  |
|          | Apr 26 to May 2, 2021  | 61  | 0-2   | 0.00-3.39   | 0-0 | 0.00-0.00  |
|          | May 3 to May 9, 2021   | 87  | 8-28  | 13.56-47.46 | 0-0 | 0.00-0.00  |
|          | May 10 to May 16, 2021 | 68  | 0-8   | 0.00-13.33  | 0-0 | 0.00-0.00  |
|          | May 17 to May 23, 2021 | 72  | 0-12  | 0.00-20.00  | 0-0 | 0.00-0.00  |
|          | May 24 to May 30, 2021 | 69  | 0-10  | 0.00-16.95  | 0-0 | 0.00-0.00  |
| Tokyo    |                        |     |       |             |     |            |
|          | Apr 5 to Apr 11, 2021  | 209 | 14-49 | 8.75-30.63  | 0-0 | 0.00-0.00  |
|          | Apr 12 to Apr 18, 2021 | 203 | 7-42  | 4.35-26.09  | 0-0 | 0.00-0.00  |
|          | Apr 19 to Apr 25, 2021 | 197 | 0-34  | 0.00-20.86  | 0-0 | 0.00-0.00  |
|          | Apr 26 to May 2, 2021  | 221 | 21-58 | 12.88-35.58 | 0-0 | 0.00-0.00  |
|          | May 3 to May 9, 2021   | 185 | 0-20  | 0.00-12.12  | 0-0 | 0.00-0.00  |
|          | May 10 to May 16, 2021 | 187 | 0-20  | 0.00-11.98  | 0-0 | 0.00-0.00  |
|          | May 17 to May 23, 2021 | 196 | 0-27  | 0.00-15.98  | 0-0 | 0.00-0.00  |
|          | May 24 to May 30, 2021 | 189 | 0-18  | 0.00-10.53  | 0-0 | 0.00-0.00  |
| Kanagawa |                        |     |       |             |     |            |
|          | Apr 5 to Apr 11, 2021  | 139 | 0-21  | 0.00-17.80  | 0-0 | 0.00-0.00  |
|          | Apr 12 to Apr 18, 2021 | 143 | 0-22  | 0.00-18.18  | 0-0 | 0.00-0.00  |
|          | Apr 19 to Apr 25, 2021 | 150 | 0-27  | 0.00-21.95  | 0-0 | 0.00-0.00  |
|          | Apr 26 to May 2, 2021  | 164 | 7-36  | 5.47-28.13  | 0-0 | 0.00-0.00  |
|          | May 3 to May 9, 2021   | 162 | 4-35  | 3.15-27.56  | 0-0 | 0.00-0.00  |
|          | May 10 to May 16, 2021 | 165 | 5-36  | 3.88-27.91  | 0-0 | 0.00-0.00  |
|          | May 17 to May 23, 2021 | 138 | 0-8   | 0.00-6.15   | 0-0 | 0.00-0.00  |

|                        |                        |     |            |              |           |            |
|------------------------|------------------------|-----|------------|--------------|-----------|------------|
| Niigata                | May 24 to May 30, 2021 | 141 | 0-8        | 0.00-6.02    | 0-0       | 0.00-0.00  |
|                        | Apr 5 to Apr 11, 2021  | 10  | 0-0        | 0.00-0.00    | 0-0       | 0.00-0.00  |
|                        | Apr 12 to Apr 18, 2021 | 12  | 0-2        | 0.00-20.00   | 0-0       | 0.00-0.00  |
|                        | Apr 19 to Apr 25, 2021 | 13  | 0-3        | 0.00-30.00   | 0-0       | 0.00-0.00  |
|                        | Apr 26 to May 2, 2021  | 17  | 0-7        | 0.00-70.00   | 0-0       | 0.00-0.00  |
|                        | May 3 to May 9, 2021   | 11  | 0-1        | 0.00-10.00   | 0-0       | 0.00-0.00  |
|                        | May 10 to May 16, 2021 | 8   | 0-0        | 0.00-0.00    | 0-3       | 0.00-27.27 |
|                        | May 17 to May 23, 2021 | 6   | 0-0        | 0.00-0.00    | 0-5       | 0.00-45.45 |
| Toyama                 | May 24 to May 30, 2021 | 16  | 0-5        | 0.00-45.45   | 0-0       | 0.00-0.00  |
|                        | Apr 5 to Apr 11, 2021  | 24  | 8-14       | 80.00-140.00 | 0-0       | 0.00-0.00  |
|                        | Apr 12 to Apr 18, 2021 | 13  | 0-3        | 0.00-30.00   | 0-0       | 0.00-0.00  |
|                        | Apr 19 to Apr 25, 2021 | 8   | 0-0        | 0.00-0.00    | 0-2       | 0.00-20.00 |
|                        | Apr 26 to May 2, 2021  | 16  | 0-6        | 0.00-60.00   | 0-0       | 0.00-0.00  |
|                        | May 3 to May 9, 2021   | 14  | 0-4        | 0.00-40.00   | 0-0       | 0.00-0.00  |
|                        | May 10 to May 16, 2021 | 18  | 0-7        | 0.00-63.64   | 0-0       | 0.00-0.00  |
|                        | May 17 to May 23, 2021 | 8   | 0-0        | 0.00-0.00    | 0-2       | 0.00-20.00 |
| Ishikawa               | May 24 to May 30, 2021 | 10  | 0-0        | 0.00-0.00    | 0-0       | 0.00-0.00  |
|                        | Apr 5 to Apr 11, 2021  | 17  | 3-9        | 37.50-112.50 | 0-0       | 0.00-0.00  |
|                        | Apr 12 to Apr 18, 2021 | 12  | 0-4        | 0.00-50.00   | 0-0       | 0.00-0.00  |
|                        | Apr 19 to Apr 25, 2021 | 14  | 0-5        | 0.00-55.56   | 0-0       | 0.00-0.00  |
|                        | Apr 26 to May 2, 2021  | 15  | 0-6        | 0.00-66.67   | 0-0       | 0.00-0.00  |
|                        | May 3 to May 9, 2021   | 18  | 2-9        | 22.22-100.00 | 0-0       | 0.00-0.00  |
|                        | May 10 to May 16, 2021 | 10  | 0-1        | 0.00-11.11   | 0-0       | 0.00-0.00  |
|                        | May 17 to May 23, 2021 | 12  | 0-3        | 0.00-33.33   | 0-0       | 0.00-0.00  |
| Fukui                  | May 24 to May 30, 2021 | 9   | 0-0        | 0.00-0.00    | 0-0       | 0.00-0.00  |
|                        | Apr 5 to Apr 11, 2021  | 3   | 0-0        | 0.00-0.00    | 0-3       | 0.00-50.00 |
|                        | Apr 12 to Apr 18, 2021 | 8   | 0-2        | 0.00-33.33   | 0-0       | 0.00-0.00  |
|                        | Apr 19 to Apr 25, 2021 | 4   | 0-0        | 0.00-0.00    | 0-2       | 0.00-33.33 |
|                        | Apr 26 to May 2, 2021  | 11  | 0-5        | 0.00-83.33   | 0-0       | 0.00-0.00  |
|                        | May 3 to May 9, 2021   | 9   | 0-4        | 0.00-80.00   | 0-0       | 0.00-0.00  |
|                        | May 10 to May 16, 2021 | 12  | 2-7        | 40.00-140.00 | 0-0       | 0.00-0.00  |
|                        | May 17 to May 23, 2021 | 5   | 0-0        | 0.00-0.00    | 0-1       | 0.00-16.67 |
| Yamanashi              | May 24 to May 30, 2021 | 11  | 0-5        | 0.00-83.33   | 0-0       | 0.00-0.00  |
|                        | Apr 5 to Apr 11, 2021  | 8   | 0-0        | 0.00-0.00    | 0-2       | 0.00-20.00 |
|                        | Apr 12 to Apr 18, 2021 | 7   | 0-0        | 0.00-0.00    | 0-3       | 0.00-30.00 |
|                        | Apr 19 to Apr 25, 2021 | 8   | 0-0        | 0.00-0.00    | 0-2       | 0.00-20.00 |
|                        | Apr 26 to May 2, 2021  | 7   | 0-0        | 0.00-0.00    | 0-3       | 0.00-30.00 |
|                        | May 3 to May 9, 2021   | 13  | 0-4        | 0.00-44.44   | 0-0       | 0.00-0.00  |
|                        | May 10 to May 16, 2021 | 14  | 0-5        | 0.00-55.56   | 0-0       | 0.00-0.00  |
|                        | May 17 to May 23, 2021 | 21  | 4-11       | 40.00-110.00 | 0-0       | 0.00-0.00  |
| May 24 to May 30, 2021 | 15                     | 0-5 | 0.00-50.00 | 0-0          | 0.00-0.00 |            |

## Nagano

|                        |    |     |            |     |            |
|------------------------|----|-----|------------|-----|------------|
| Apr 5 to Apr 11, 2021  | 27 | 0-7 | 0.00-35.00 | 0-0 | 0.00-0.00  |
| Apr 12 to Apr 18, 2021 | 18 | 0-0 | 0.00-0.00  | 0-2 | 0.00-10.00 |
| Apr 19 to Apr 25, 2021 | 19 | 0-0 | 0.00-0.00  | 0-1 | 0.00-5.00  |
| Apr 26 to May 2, 2021  | 20 | 0-1 | 0.00-5.26  | 0-0 | 0.00-0.00  |
| May 3 to May 9, 2021   | 23 | 0-4 | 0.00-21.05 | 0-0 | 0.00-0.00  |
| May 10 to May 16, 2021 | 21 | 0-2 | 0.00-10.53 | 0-0 | 0.00-0.00  |
| May 17 to May 23, 2021 | 23 | 0-4 | 0.00-21.05 | 0-0 | 0.00-0.00  |
| May 24 to May 30, 2021 | 19 | 0-0 | 0.00-0.00  | 0-0 | 0.00-0.00  |

## Gifu

|                        |    |      |             |     |           |
|------------------------|----|------|-------------|-----|-----------|
| Apr 5 to Apr 11, 2021  | 34 | 0-10 | 0.00-41.67  | 0-0 | 0.00-0.00 |
| Apr 12 to Apr 18, 2021 | 41 | 6-17 | 25.00-70.83 | 0-0 | 0.00-0.00 |
| Apr 19 to Apr 25, 2021 | 40 | 5-15 | 20.00-60.00 | 0-0 | 0.00-0.00 |
| Apr 26 to May 2, 2021  | 29 | 0-5  | 0.00-20.83  | 0-0 | 0.00-0.00 |
| May 3 to May 9, 2021   | 35 | 0-11 | 0.00-45.83  | 0-0 | 0.00-0.00 |
| May 10 to May 16, 2021 | 33 | 0-9  | 0.00-37.50  | 0-0 | 0.00-0.00 |
| May 17 to May 23, 2021 | 41 | 6-17 | 25.00-70.83 | 0-0 | 0.00-0.00 |
| May 24 to May 30, 2021 | 27 | 0-3  | 0.00-12.50  | 0-0 | 0.00-0.00 |

## Shizuoka

|                        |    |      |            |     |            |
|------------------------|----|------|------------|-----|------------|
| Apr 5 to Apr 11, 2021  | 48 | 0-5  | 0.00-11.63 | 0-0 | 0.00-0.00  |
| Apr 12 to Apr 18, 2021 | 41 | 0-0  | 0.00-0.00  | 0-2 | 0.00-4.65  |
| Apr 19 to Apr 25, 2021 | 48 | 0-4  | 0.00-9.09  | 0-0 | 0.00-0.00  |
| Apr 26 to May 2, 2021  | 60 | 2-17 | 4.65-39.53 | 0-0 | 0.00-0.00  |
| May 3 to May 9, 2021   | 58 | 1-16 | 2.38-38.10 | 0-0 | 0.00-0.00  |
| May 10 to May 16, 2021 | 39 | 0-0  | 0.00-0.00  | 0-2 | 0.00-4.88  |
| May 17 to May 23, 2021 | 52 | 0-11 | 0.00-26.83 | 0-0 | 0.00-0.00  |
| May 24 to May 30, 2021 | 37 | 0-0  | 0.00-0.00  | 0-6 | 0.00-13.95 |

## Aichi

|                        |     |       |             |     |           |
|------------------------|-----|-------|-------------|-----|-----------|
| Apr 5 to Apr 11, 2021  | 70  | 0-9   | 0.00-14.75  | 0-0 | 0.00-0.00 |
| Apr 12 to Apr 18, 2021 | 73  | 0-12  | 0.00-19.67  | 0-0 | 0.00-0.00 |
| Apr 19 to Apr 25, 2021 | 86  | 7-26  | 11.67-43.33 | 0-0 | 0.00-0.00 |
| Apr 26 to May 2, 2021  | 86  | 5-23  | 7.94-36.51  | 0-0 | 0.00-0.00 |
| May 3 to May 9, 2021   | 76  | 0-12  | 0.00-18.75  | 0-0 | 0.00-0.00 |
| May 10 to May 16, 2021 | 100 | 17-35 | 26.15-53.85 | 0-0 | 0.00-0.00 |
| May 17 to May 23, 2021 | 75  | 0-10  | 0.00-15.38  | 0-0 | 0.00-0.00 |
| May 24 to May 30, 2021 | 77  | 0-13  | 0.00-20.31  | 0-0 | 0.00-0.00 |

## Mie

|                        |    |     |            |     |           |
|------------------------|----|-----|------------|-----|-----------|
| Apr 5 to Apr 11, 2021  | 24 | 0-5 | 0.00-26.32 | 0-0 | 0.00-0.00 |
| Apr 12 to Apr 18, 2021 | 22 | 0-3 | 0.00-15.79 | 0-0 | 0.00-0.00 |
| Apr 19 to Apr 25, 2021 | 23 | 0-4 | 0.00-21.05 | 0-0 | 0.00-0.00 |
| Apr 26 to May 2, 2021  | 23 | 0-4 | 0.00-21.05 | 0-0 | 0.00-0.00 |
| May 3 to May 9, 2021   | 22 | 0-4 | 0.00-22.22 | 0-0 | 0.00-0.00 |
| May 10 to May 16, 2021 | 20 | 0-2 | 0.00-11.11 | 0-0 | 0.00-0.00 |
| May 17 to May 23, 2021 | 26 | 0-9 | 0.00-52.94 | 0-0 | 0.00-0.00 |
| May 24 to May 30, 2021 | 24 | 0-6 | 0.00-33.33 | 0-0 | 0.00-0.00 |

## Shiga

|          |                        |     |       |              |     |            |
|----------|------------------------|-----|-------|--------------|-----|------------|
|          | Apr 5 to Apr 11, 2021  | 14  | 0-5   | 0.00-55.56   | 0-0 | 0.00-0.00  |
|          | Apr 12 to Apr 18, 2021 | 14  | 0-5   | 0.00-55.56   | 0-0 | 0.00-0.00  |
|          | Apr 19 to Apr 25, 2021 | 18  | 3-9   | 33.33-100.00 | 0-0 | 0.00-0.00  |
|          | Apr 26 to May 2, 2021  | 17  | 1-7   | 10.00-70.00  | 0-0 | 0.00-0.00  |
|          | May 3 to May 9, 2021   | 16  | 0-7   | 0.00-77.78   | 0-0 | 0.00-0.00  |
|          | May 10 to May 16, 2021 | 22  | 6-13  | 66.67-144.44 | 0-0 | 0.00-0.00  |
|          | May 17 to May 23, 2021 | 14  | 0-5   | 0.00-55.56   | 0-0 | 0.00-0.00  |
|          | May 24 to May 30, 2021 | 19  | 2-9   | 20.00-90.00  | 0-0 | 0.00-0.00  |
| Kyoto    |                        |     |       |              |     |            |
|          | Apr 5 to Apr 11, 2021  | 43  | 8-19  | 33.33-79.17  | 0-0 | 0.00-0.00  |
|          | Apr 12 to Apr 18, 2021 | 26  | 0-1   | 0.00-4.00    | 0-0 | 0.00-0.00  |
|          | Apr 19 to Apr 25, 2021 | 37  | 0-12  | 0.00-48.00   | 0-0 | 0.00-0.00  |
|          | Apr 26 to May 2, 2021  | 31  | 0-5   | 0.00-19.23   | 0-0 | 0.00-0.00  |
|          | May 3 to May 9, 2021   | 38  | 0-11  | 0.00-40.74   | 0-0 | 0.00-0.00  |
|          | May 10 to May 16, 2021 | 32  | 0-5   | 0.00-18.52   | 0-0 | 0.00-0.00  |
|          | May 17 to May 23, 2021 | 39  | 0-11  | 0.00-39.29   | 0-0 | 0.00-0.00  |
|          | May 24 to May 30, 2021 | 35  | 0-7   | 0.00-25.00   | 0-0 | 0.00-0.00  |
| Osaka    |                        |     |       |              |     |            |
|          | Apr 5 to Apr 11, 2021  | 124 | 0-24  | 0.00-24.00   | 0-0 | 0.00-0.00  |
|          | Apr 12 to Apr 18, 2021 | 125 | 0-26  | 0.00-26.26   | 0-0 | 0.00-0.00  |
|          | Apr 19 to Apr 25, 2021 | 147 | 23-48 | 23.23-48.48  | 0-0 | 0.00-0.00  |
|          | Apr 26 to May 2, 2021  | 149 | 26-52 | 26.80-53.61  | 0-0 | 0.00-0.00  |
|          | May 3 to May 9, 2021   | 137 | 13-39 | 13.27-39.80  | 0-0 | 0.00-0.00  |
|          | May 10 to May 16, 2021 | 120 | 0-21  | 0.00-21.21   | 0-0 | 0.00-0.00  |
|          | May 17 to May 23, 2021 | 125 | 0-27  | 0.00-27.55   | 0-0 | 0.00-0.00  |
|          | May 24 to May 30, 2021 | 120 | 0-19  | 0.00-18.81   | 0-0 | 0.00-0.00  |
| Hyogo    |                        |     |       |              |     |            |
|          | Apr 5 to Apr 11, 2021  | 73  | 0-12  | 0.00-19.67   | 0-0 | 0.00-0.00  |
|          | Apr 12 to Apr 18, 2021 | 100 | 19-38 | 30.65-61.29  | 0-0 | 0.00-0.00  |
|          | Apr 19 to Apr 25, 2021 | 95  | 13-32 | 20.63-50.79  | 0-0 | 0.00-0.00  |
|          | Apr 26 to May 2, 2021  | 111 | 31-50 | 50.82-81.97  | 0-0 | 0.00-0.00  |
|          | May 3 to May 9, 2021   | 93  | 10-30 | 15.87-47.62  | 0-0 | 0.00-0.00  |
|          | May 10 to May 16, 2021 | 97  | 14-34 | 22.22-53.97  | 0-0 | 0.00-0.00  |
|          | May 17 to May 23, 2021 | 81  | 0-18  | 0.00-28.57   | 0-0 | 0.00-0.00  |
|          | May 24 to May 30, 2021 | 91  | 6-26  | 9.23-40.00   | 0-0 | 0.00-0.00  |
| Nara     |                        |     |       |              |     |            |
|          | Apr 5 to Apr 11, 2021  | 21  | 0-5   | 0.00-31.25   | 0-0 | 0.00-0.00  |
|          | Apr 12 to Apr 18, 2021 | 18  | 0-2   | 0.00-12.50   | 0-0 | 0.00-0.00  |
|          | Apr 19 to Apr 25, 2021 | 16  | 0-0   | 0.00-0.00    | 0-0 | 0.00-0.00  |
|          | Apr 26 to May 2, 2021  | 17  | 0-1   | 0.00-6.25    | 0-0 | 0.00-0.00  |
|          | May 3 to May 9, 2021   | 19  | 0-2   | 0.00-11.76   | 0-0 | 0.00-0.00  |
|          | May 10 to May 16, 2021 | 21  | 0-4   | 0.00-23.53   | 0-0 | 0.00-0.00  |
|          | May 17 to May 23, 2021 | 10  | 0-0   | 0.00-0.00    | 0-7 | 0.00-41.18 |
|          | May 24 to May 30, 2021 | 22  | 0-5   | 0.00-29.41   | 0-0 | 0.00-0.00  |
| Wakayama |                        |     |       |              |     |            |
|          | Apr 5 to Apr 11, 2021  | 9   | 0-0   | 0.00-0.00    | 0-2 | 0.00-18.18 |



|           |                        |    |      |              |     |            |
|-----------|------------------------|----|------|--------------|-----|------------|
|           | Apr 12 to Apr 18, 2021 | 14 | 0-3  | 0.00-27.27   | 0-0 | 0.00-0.00  |
|           | Apr 19 to Apr 25, 2021 | 11 | 0-0  | 0.00-0.00    | 0-0 | 0.00-0.00  |
|           | Apr 26 to May 2, 2021  | 12 | 0-1  | 0.00-9.09    | 0-0 | 0.00-0.00  |
|           | May 3 to May 9, 2021   | 23 | 4-12 | 36.36-109.09 | 0-0 | 0.00-0.00  |
|           | May 10 to May 16, 2021 | 15 | 0-5  | 0.00-50.00   | 0-0 | 0.00-0.00  |
|           | May 17 to May 23, 2021 | 16 | 0-5  | 0.00-45.45   | 0-0 | 0.00-0.00  |
|           | May 24 to May 30, 2021 | 16 | 0-5  | 0.00-45.45   | 0-0 | 0.00-0.00  |
| Tottori   |                        |    |      |              |     |            |
|           | Apr 5 to Apr 11, 2021  | 5  | 0-1  | 0.00-25.00   | 0-0 | 0.00-0.00  |
|           | Apr 12 to Apr 18, 2021 | 5  | 0-1  | 0.00-25.00   | 0-0 | 0.00-0.00  |
|           | Apr 19 to Apr 25, 2021 | 4  | 0-0  | 0.00-0.00    | 0-0 | 0.00-0.00  |
|           | Apr 26 to May 2, 2021  | 8  | 0-4  | 0.00-100.00  | 0-0 | 0.00-0.00  |
|           | May 3 to May 9, 2021   | 4  | 0-0  | 0.00-0.00    | 0-0 | 0.00-0.00  |
|           | May 10 to May 16, 2021 | 8  | 0-3  | 0.00-60.00   | 0-0 | 0.00-0.00  |
|           | May 17 to May 23, 2021 | 9  | 0-4  | 0.00-80.00   | 0-0 | 0.00-0.00  |
|           | May 24 to May 30, 2021 | 11 | 1-6  | 20.00-120.00 | 0-0 | 0.00-0.00  |
| Shimane   |                        |    |      |              |     |            |
|           | Apr 5 to Apr 11, 2021  | 6  | 0-1  | 0.00-20.00   | 0-0 | 0.00-0.00  |
|           | Apr 12 to Apr 18, 2021 | 9  | 0-4  | 0.00-80.00   | 0-0 | 0.00-0.00  |
|           | Apr 19 to Apr 25, 2021 | 3  | 0-0  | 0.00-0.00    | 0-2 | 0.00-40.00 |
|           | Apr 26 to May 2, 2021  | 6  | 0-1  | 0.00-20.00   | 0-0 | 0.00-0.00  |
|           | May 3 to May 9, 2021   | 6  | 0-1  | 0.00-20.00   | 0-0 | 0.00-0.00  |
|           | May 10 to May 16, 2021 | 2  | 0-0  | 0.00-0.00    | 0-2 | 0.00-50.00 |
|           | May 17 to May 23, 2021 | 2  | 0-0  | 0.00-0.00    | 0-3 | 0.00-60.00 |
|           | May 24 to May 30, 2021 | 4  | 0-0  | 0.00-0.00    | 0-1 | 0.00-20.00 |
| Okayama   |                        |    |      |              |     |            |
|           | Apr 5 to Apr 11, 2021  | 16 | 0-4  | 0.00-33.33   | 0-0 | 0.00-0.00  |
|           | Apr 12 to Apr 18, 2021 | 15 | 0-2  | 0.00-15.38   | 0-0 | 0.00-0.00  |
|           | Apr 19 to Apr 25, 2021 | 21 | 0-7  | 0.00-50.00   | 0-0 | 0.00-0.00  |
|           | Apr 26 to May 2, 2021  | 22 | 0-7  | 0.00-46.67   | 0-0 | 0.00-0.00  |
|           | May 3 to May 9, 2021   | 16 | 0-1  | 0.00-6.67    | 0-0 | 0.00-0.00  |
|           | May 10 to May 16, 2021 | 27 | 4-12 | 26.67-80.00  | 0-0 | 0.00-0.00  |
|           | May 17 to May 23, 2021 | 20 | 0-5  | 0.00-33.33   | 0-0 | 0.00-0.00  |
|           | May 24 to May 30, 2021 | 25 | 2-10 | 13.33-66.67  | 0-0 | 0.00-0.00  |
| Hiroshima |                        |    |      |              |     |            |
|           | Apr 5 to Apr 11, 2021  | 24 | 0-6  | 0.00-33.33   | 0-0 | 0.00-0.00  |
|           | Apr 12 to Apr 18, 2021 | 26 | 0-8  | 0.00-44.44   | 0-0 | 0.00-0.00  |
|           | Apr 19 to Apr 25, 2021 | 33 | 6-15 | 33.33-83.33  | 0-0 | 0.00-0.00  |
|           | Apr 26 to May 2, 2021  | 20 | 0-2  | 0.00-11.11   | 0-0 | 0.00-0.00  |
|           | May 3 to May 9, 2021   | 36 | 9-18 | 50.00-100.00 | 0-0 | 0.00-0.00  |
|           | May 10 to May 16, 2021 | 25 | 0-7  | 0.00-38.89   | 0-0 | 0.00-0.00  |
|           | May 17 to May 23, 2021 | 33 | 6-15 | 33.33-83.33  | 0-0 | 0.00-0.00  |
|           | May 24 to May 30, 2021 | 25 | 0-6  | 0.00-31.58   | 0-0 | 0.00-0.00  |
| Yamaguchi |                        |    |      |              |     |            |
|           | Apr 5 to Apr 11, 2021  | 11 | 0-2  | 0.00-22.22   | 0-0 | 0.00-0.00  |
|           | Apr 12 to Apr 18, 2021 | 13 | 0-3  | 0.00-30.00   | 0-0 | 0.00-0.00  |

|           |                        |    |      |              |     |            |
|-----------|------------------------|----|------|--------------|-----|------------|
|           | Apr 19 to Apr 25, 2021 | 15 | 0-6  | 0.00-66.67   | 0-0 | 0.00-0.00  |
|           | Apr 26 to May 2, 2021  | 9  | 0-0  | 0.00-0.00    | 0-0 | 0.00-0.00  |
|           | May 3 to May 9, 2021   | 12 | 0-3  | 0.00-33.33   | 0-0 | 0.00-0.00  |
|           | May 10 to May 16, 2021 | 16 | 0-7  | 0.00-77.78   | 0-0 | 0.00-0.00  |
|           | May 17 to May 23, 2021 | 13 | 0-5  | 0.00-62.50   | 0-0 | 0.00-0.00  |
|           | May 24 to May 30, 2021 | 19 | 4-10 | 44.44-111.11 | 0-0 | 0.00-0.00  |
| Tokushima |                        |    |      |              |     |            |
|           | Apr 5 to Apr 11, 2021  | 10 | 0-5  | 0.00-100.00  | 0-0 | 0.00-0.00  |
|           | Apr 12 to Apr 18, 2021 | 7  | 0-2  | 0.00-40.00   | 0-0 | 0.00-0.00  |
|           | Apr 19 to Apr 25, 2021 | 7  | 0-2  | 0.00-40.00   | 0-0 | 0.00-0.00  |
|           | Apr 26 to May 2, 2021  | 12 | 2-7  | 40.00-140.00 | 0-0 | 0.00-0.00  |
|           | May 3 to May 9, 2021   | 11 | 1-6  | 20.00-120.00 | 0-0 | 0.00-0.00  |
|           | May 10 to May 16, 2021 | 7  | 0-2  | 0.00-40.00   | 0-0 | 0.00-0.00  |
|           | May 17 to May 23, 2021 | 6  | 0-1  | 0.00-20.00   | 0-0 | 0.00-0.00  |
|           | May 24 to May 30, 2021 | 7  | 0-2  | 0.00-40.00   | 0-0 | 0.00-0.00  |
| Kagawa    |                        |    |      |              |     |            |
|           | Apr 5 to Apr 11, 2021  | 8  | 0-0  | 0.00-0.00    | 0-0 | 0.00-0.00  |
|           | Apr 12 to Apr 18, 2021 | 6  | 0-0  | 0.00-0.00    | 0-2 | 0.00-25.00 |
|           | Apr 19 to Apr 25, 2021 | 15 | 0-7  | 0.00-87.50   | 0-0 | 0.00-0.00  |
|           | Apr 26 to May 2, 2021  | 10 | 0-2  | 0.00-25.00   | 0-0 | 0.00-0.00  |
|           | May 3 to May 9, 2021   | 10 | 0-2  | 0.00-25.00   | 0-0 | 0.00-0.00  |
|           | May 10 to May 16, 2021 | 11 | 0-3  | 0.00-37.50   | 0-0 | 0.00-0.00  |
|           | May 17 to May 23, 2021 | 12 | 0-4  | 0.00-50.00   | 0-0 | 0.00-0.00  |
|           | May 24 to May 30, 2021 | 14 | 0-6  | 0.00-75.00   | 0-0 | 0.00-0.00  |
| Ehime     |                        |    |      |              |     |            |
|           | Apr 5 to Apr 11, 2021  | 21 | 0-8  | 0.00-61.54   | 0-0 | 0.00-0.00  |
|           | Apr 12 to Apr 18, 2021 | 17 | 0-3  | 0.00-21.43   | 0-0 | 0.00-0.00  |
|           | Apr 19 to Apr 25, 2021 | 21 | 0-8  | 0.00-61.54   | 0-0 | 0.00-0.00  |
|           | Apr 26 to May 2, 2021  | 18 | 0-5  | 0.00-38.46   | 0-0 | 0.00-0.00  |
|           | May 3 to May 9, 2021   | 21 | 0-8  | 0.00-61.54   | 0-0 | 0.00-0.00  |
|           | May 10 to May 16, 2021 | 11 | 0-0  | 0.00-0.00    | 0-3 | 0.00-21.43 |
|           | May 17 to May 23, 2021 | 11 | 0-0  | 0.00-0.00    | 0-3 | 0.00-21.43 |
|           | May 24 to May 30, 2021 | 19 | 0-6  | 0.00-46.15   | 0-0 | 0.00-0.00  |
| Kochi     |                        |    |      |              |     |            |
|           | Apr 5 to Apr 11, 2021  | 6  | 0-0  | 0.00-0.00    | 0-0 | 0.00-0.00  |
|           | Apr 12 to Apr 18, 2021 | 16 | 5-10 | 83.33-166.67 | 0-0 | 0.00-0.00  |
|           | Apr 19 to Apr 25, 2021 | 9  | 0-3  | 0.00-50.00   | 0-0 | 0.00-0.00  |
|           | Apr 26 to May 2, 2021  | 7  | 0-1  | 0.00-16.67   | 0-0 | 0.00-0.00  |
|           | May 3 to May 9, 2021   | 4  | 0-0  | 0.00-0.00    | 0-2 | 0.00-33.33 |
|           | May 10 to May 16, 2021 | 7  | 0-1  | 0.00-16.67   | 0-0 | 0.00-0.00  |
|           | May 17 to May 23, 2021 | 7  | 0-1  | 0.00-16.67   | 0-0 | 0.00-0.00  |
|           | May 24 to May 30, 2021 | 8  | 0-2  | 0.00-33.33   | 0-0 | 0.00-0.00  |
| Fukuoka   |                        |    |      |              |     |            |
|           | Apr 5 to Apr 11, 2021  | 60 | 3-19 | 7.32-46.34   | 0-0 | 0.00-0.00  |
|           | Apr 12 to Apr 18, 2021 | 56 | 0-14 | 0.00-33.33   | 0-0 | 0.00-0.00  |
|           | Apr 19 to Apr 25, 2021 | 51 | 0-9  | 0.00-21.43   | 0-0 | 0.00-0.00  |

|          |                        |    |      |              |     |            |
|----------|------------------------|----|------|--------------|-----|------------|
|          | Apr 26 to May 2, 2021  | 67 | 9-25 | 21.43-59.52  | 0-0 | 0.00-0.00  |
|          | May 3 to May 9, 2021   | 50 | 0-7  | 0.00-16.28   | 0-0 | 0.00-0.00  |
|          | May 10 to May 16, 2021 | 54 | 0-11 | 0.00-25.58   | 0-0 | 0.00-0.00  |
|          | May 17 to May 23, 2021 | 54 | 0-11 | 0.00-25.58   | 0-0 | 0.00-0.00  |
|          | May 24 to May 30, 2021 | 59 | 0-15 | 0.00-34.09   | 0-0 | 0.00-0.00  |
| Saga     |                        |    |      |              |     |            |
|          | Apr 5 to Apr 11, 2021  | 5  | 0-0  | 0.00-0.00    | 0-1 | 0.00-16.67 |
|          | Apr 12 to Apr 18, 2021 | 11 | 0-5  | 0.00-83.33   | 0-0 | 0.00-0.00  |
|          | Apr 19 to Apr 25, 2021 | 12 | 0-6  | 0.00-100.00  | 0-0 | 0.00-0.00  |
|          | Apr 26 to May 2, 2021  | 7  | 0-1  | 0.00-16.67   | 0-0 | 0.00-0.00  |
|          | May 3 to May 9, 2021   | 14 | 2-8  | 33.33-133.33 | 0-0 | 0.00-0.00  |
|          | May 10 to May 16, 2021 | 4  | 0-0  | 0.00-0.00    | 0-2 | 0.00-33.33 |
|          | May 17 to May 23, 2021 | 14 | 2-8  | 33.33-133.33 | 0-0 | 0.00-0.00  |
|          | May 24 to May 30, 2021 | 8  | 0-2  | 0.00-33.33   | 0-0 | 0.00-0.00  |
| Nagasaki |                        |    |      |              |     |            |
|          | Apr 5 to Apr 11, 2021  | 19 | 0-5  | 0.00-35.71   | 0-0 | 0.00-0.00  |
|          | Apr 12 to Apr 18, 2021 | 18 | 0-4  | 0.00-28.57   | 0-0 | 0.00-0.00  |
|          | Apr 19 to Apr 25, 2021 | 19 | 0-5  | 0.00-35.71   | 0-0 | 0.00-0.00  |
|          | Apr 26 to May 2, 2021  | 12 | 0-0  | 0.00-0.00    | 0-2 | 0.00-14.29 |
|          | May 3 to May 9, 2021   | 13 | 0-0  | 0.00-0.00    | 0-0 | 0.00-0.00  |
|          | May 10 to May 16, 2021 | 21 | 1-8  | 7.69-61.54   | 0-0 | 0.00-0.00  |
|          | May 17 to May 23, 2021 | 10 | 0-0  | 0.00-0.00    | 0-2 | 0.00-16.67 |
|          | May 24 to May 30, 2021 | 21 | 2-9  | 16.67-75.00  | 0-0 | 0.00-0.00  |
| Kumamoto |                        |    |      |              |     |            |
|          | Apr 5 to Apr 11, 2021  | 18 | 0-7  | 0.00-63.64   | 0-0 | 0.00-0.00  |
|          | Apr 12 to Apr 18, 2021 | 17 | 0-6  | 0.00-54.55   | 0-0 | 0.00-0.00  |
|          | Apr 19 to Apr 25, 2021 | 20 | 2-9  | 18.18-81.82  | 0-0 | 0.00-0.00  |
|          | Apr 26 to May 2, 2021  | 17 | 0-5  | 0.00-41.67   | 0-0 | 0.00-0.00  |
|          | May 3 to May 9, 2021   | 14 | 0-2  | 0.00-16.67   | 0-0 | 0.00-0.00  |
|          | May 10 to May 16, 2021 | 20 | 1-8  | 8.33-66.67   | 0-0 | 0.00-0.00  |
|          | May 17 to May 23, 2021 | 14 | 0-2  | 0.00-16.67   | 0-0 | 0.00-0.00  |
|          | May 24 to May 30, 2021 | 14 | 0-1  | 0.00-7.69    | 0-0 | 0.00-0.00  |
| Oita     |                        |    |      |              |     |            |
|          | Apr 5 to Apr 11, 2021  | 9  | 0-2  | 0.00-28.57   | 0-0 | 0.00-0.00  |
|          | Apr 12 to Apr 18, 2021 | 7  | 0-0  | 0.00-0.00    | 0-0 | 0.00-0.00  |
|          | Apr 19 to Apr 25, 2021 | 8  | 0-1  | 0.00-14.29   | 0-0 | 0.00-0.00  |
|          | Apr 26 to May 2, 2021  | 16 | 2-8  | 25.00-100.00 | 0-0 | 0.00-0.00  |
|          | May 3 to May 9, 2021   | 16 | 3-8  | 37.50-100.00 | 0-0 | 0.00-0.00  |
|          | May 10 to May 16, 2021 | 12 | 0-4  | 0.00-50.00   | 0-0 | 0.00-0.00  |
|          | May 17 to May 23, 2021 | 6  | 0-0  | 0.00-0.00    | 0-2 | 0.00-25.00 |
|          | May 24 to May 30, 2021 | 11 | 0-3  | 0.00-37.50   | 0-0 | 0.00-0.00  |
| Miyazaki |                        |    |      |              |     |            |
|          | Apr 5 to Apr 11, 2021  | 5  | 0-0  | 0.00-0.00    | 0-2 | 0.00-28.57 |
|          | Apr 12 to Apr 18, 2021 | 5  | 0-0  | 0.00-0.00    | 0-2 | 0.00-28.57 |
|          | Apr 19 to Apr 25, 2021 | 9  | 0-3  | 0.00-50.00   | 0-0 | 0.00-0.00  |
|          | Apr 26 to May 2, 2021  | 10 | 0-3  | 0.00-42.86   | 0-0 | 0.00-0.00  |

|           |                        |    |      |              |     |            |
|-----------|------------------------|----|------|--------------|-----|------------|
|           | May 3 to May 9, 2021   | 11 | 0-4  | 0.00-57.14   | 0-0 | 0.00-0.00  |
|           | May 10 to May 16, 2021 | 13 | 1-6  | 14.29-85.71  | 0-0 | 0.00-0.00  |
|           | May 17 to May 23, 2021 | 7  | 0-0  | 0.00-0.00    | 0-0 | 0.00-0.00  |
|           | May 24 to May 30, 2021 | 7  | 0-0  | 0.00-0.00    | 0-0 | 0.00-0.00  |
| Kagoshima |                        |    |      |              |     |            |
|           | Apr 5 to Apr 11, 2021  | 15 | 0-3  | 0.00-25.00   | 0-0 | 0.00-0.00  |
|           | Apr 12 to Apr 18, 2021 | 11 | 0-0  | 0.00-0.00    | 0-0 | 0.00-0.00  |
|           | Apr 19 to Apr 25, 2021 | 16 | 0-5  | 0.00-45.45   | 0-0 | 0.00-0.00  |
|           | Apr 26 to May 2, 2021  | 15 | 0-4  | 0.00-36.36   | 0-0 | 0.00-0.00  |
|           | May 3 to May 9, 2021   | 17 | 0-5  | 0.00-41.67   | 0-0 | 0.00-0.00  |
|           | May 10 to May 16, 2021 | 21 | 1-9  | 8.33-75.00   | 0-0 | 0.00-0.00  |
|           | May 17 to May 23, 2021 | 10 | 0-0  | 0.00-0.00    | 0-2 | 0.00-16.67 |
|           | May 24 to May 30, 2021 | 14 | 0-1  | 0.00-7.69    | 0-0 | 0.00-0.00  |
| Okinawa   |                        |    |      |              |     |            |
|           | Apr 5 to Apr 11, 2021  | 20 | 4-10 | 40.00-100.00 | 0-0 | 0.00-0.00  |
|           | Apr 12 to Apr 18, 2021 | 16 | 0-6  | 0.00-60.00   | 0-0 | 0.00-0.00  |
|           | Apr 19 to Apr 25, 2021 | 18 | 1-8  | 10.00-80.00  | 0-0 | 0.00-0.00  |
|           | Apr 26 to May 2, 2021  | 19 | 1-8  | 9.09-72.73   | 0-0 | 0.00-0.00  |
|           | May 3 to May 9, 2021   | 6  | 0-0  | 0.00-0.00    | 0-4 | 0.00-40.00 |
|           | May 10 to May 16, 2021 | 15 | 0-5  | 0.00-50.00   | 0-0 | 0.00-0.00  |
|           | May 17 to May 23, 2021 | 19 | 2-9  | 20.00-90.00  | 0-0 | 0.00-0.00  |
|           | May 24 to May 30, 2021 | 13 | 0-3  | 0.00-30.00   | 0-0 | 0.00-0.00  |

---

**Table A.17: Weekly number of observed and excess/exiguous deaths in Japan and 47 prefectures for senility-related deaths in all places from January 2020 through May 2021.**

| Prefecture | Week                   | Observed | Excess deaths | Percent excess | Exiguous deaths | Percent exiguous |
|------------|------------------------|----------|---------------|----------------|-----------------|------------------|
| Japan      |                        |          |               |                |                 |                  |
|            | Apr 5 to Apr 11, 2021  | 2750     | 0–58          | 0.00–2.15      | 0–0             | 0.00–0.00        |
|            | Apr 12 to Apr 18, 2021 | 3002     | 186–353       | 7.02–13.33     | 0–0             | 0.00–0.00        |
|            | Apr 19 to Apr 25, 2021 | 2860     | 90–265        | 3.47–10.21     | 0–0             | 0.00–0.00        |
|            | Apr 26 to May 2, 2021  | 2978     | 256–429       | 10.04–16.83    | 0–0             | 0.00–0.00        |
|            | May 3 to May 9, 2021   | 3002     | 329–487       | 13.08–19.36    | 0–0             | 0.00–0.00        |
|            | May 10 to May 16, 2021 | 2890     | 236–401       | 9.48–16.11     | 0–0             | 0.00–0.00        |
|            | May 17 to May 23, 2021 | 2781     | 164–321       | 6.67–13.05     | 0–0             | 0.00–0.00        |
|            | May 24 to May 30, 2021 | 2738     | 127–287       | 5.18–11.71     | 0–0             | 0.00–0.00        |
| Hokkaido   |                        |          |               |                |                 |                  |
|            | Apr 5 to Apr 11, 2021  | 118      | 0–21          | 0.00–21.65     | 0–0             | 0.00–0.00        |
|            | Apr 12 to Apr 18, 2021 | 117      | 0–20          | 0.00–20.62     | 0–0             | 0.00–0.00        |
|            | Apr 19 to Apr 25, 2021 | 101      | 0–3           | 0.00–3.06      | 0–0             | 0.00–0.00        |
|            | Apr 26 to May 2, 2021  | 119      | 2–24          | 2.11–25.26     | 0–0             | 0.00–0.00        |
|            | May 3 to May 9, 2021   | 124      | 7–28          | 7.29–29.17     | 0–0             | 0.00–0.00        |
|            | May 10 to May 16, 2021 | 89       | 0–0           | 0.00–0.00      | 0–6             | 0.00–6.32        |
|            | May 17 to May 23, 2021 | 108      | 0–14          | 0.00–14.89     | 0–0             | 0.00–0.00        |
|            | May 24 to May 30, 2021 | 123      | 10–31         | 10.87–33.70    | 0–0             | 0.00–0.00        |
| Aomori     |                        |          |               |                |                 |                  |
|            | Apr 5 to Apr 11, 2021  | 29       | 0–0           | 0.00–0.00      | 0–5             | 0.00–14.71       |
|            | Apr 12 to Apr 18, 2021 | 32       | 0–0           | 0.00–0.00      | 0–1             | 0.00–3.03        |
|            | Apr 19 to Apr 25, 2021 | 29       | 0–0           | 0.00–0.00      | 0–3             | 0.00–9.38        |
|            | Apr 26 to May 2, 2021  | 36       | 0–5           | 0.00–16.13     | 0–0             | 0.00–0.00        |
|            | May 3 to May 9, 2021   | 39       | 0–7           | 0.00–21.88     | 0–0             | 0.00–0.00        |
|            | May 10 to May 16, 2021 | 41       | 0–9           | 0.00–28.13     | 0–0             | 0.00–0.00        |
|            | May 17 to May 23, 2021 | 39       | 0–8           | 0.00–25.81     | 0–0             | 0.00–0.00        |
|            | May 24 to May 30, 2021 | 27       | 0–0           | 0.00–0.00      | 0–5             | 0.00–15.63       |
| Iwate      |                        |          |               |                |                 |                  |
|            | Apr 5 to Apr 11, 2021  | 39       | 0–1           | 0.00–2.63      | 0–0             | 0.00–0.00        |
|            | Apr 12 to Apr 18, 2021 | 31       | 0–0           | 0.00–0.00      | 0–7             | 0.00–18.42       |
|            | Apr 19 to Apr 25, 2021 | 30       | 0–0           | 0.00–0.00      | 0–7             | 0.00–18.92       |
|            | Apr 26 to May 2, 2021  | 23       | 0–0           | 0.00–0.00      | 2–14            | 5.41–37.84       |
|            | May 3 to May 9, 2021   | 31       | 0–0           | 0.00–0.00      | 0–5             | 0.00–13.89       |
|            | May 10 to May 16, 2021 | 29       | 0–0           | 0.00–0.00      | 0–7             | 0.00–19.44       |
|            | May 17 to May 23, 2021 | 35       | 0–0           | 0.00–0.00      | 0–1             | 0.00–2.78        |
|            | May 24 to May 30, 2021 | 26       | 0–0           | 0.00–0.00      | 0–10            | 0.00–27.78       |
| Miyagi     |                        |          |               |                |                 |                  |
|            | Apr 5 to Apr 11, 2021  | 54       | 0–4           | 0.00–8.00      | 0–0             | 0.00–0.00        |
|            | Apr 12 to Apr 18, 2021 | 76       | 9–24          | 17.31–46.15    | 0–0             | 0.00–0.00        |
|            | Apr 19 to Apr 25, 2021 | 60       | 0–8           | 0.00–15.38     | 0–0             | 0.00–0.00        |
|            | Apr 26 to May 2, 2021  | 53       | 0–0           | 0.00–0.00      | 0–0             | 0.00–0.00        |
|            | May 3 to May 9, 2021   | 57       | 0–5           | 0.00–9.62      | 0–0             | 0.00–0.00        |

|           |                        |    |      |             |     |            |
|-----------|------------------------|----|------|-------------|-----|------------|
|           | May 10 to May 16, 2021 | 58 | 0-8  | 0.00-16.00  | 0-0 | 0.00-0.00  |
|           | May 17 to May 23, 2021 | 50 | 0-2  | 0.00-4.17   | 0-0 | 0.00-0.00  |
|           | May 24 to May 30, 2021 | 54 | 0-7  | 0.00-14.89  | 0-0 | 0.00-0.00  |
| Akita     |                        |    |      |             |     |            |
|           | Apr 5 to Apr 11, 2021  | 27 | 0-0  | 0.00-0.00   | 0-4 | 0.00-12.90 |
|           | Apr 12 to Apr 18, 2021 | 38 | 0-8  | 0.00-26.67  | 0-0 | 0.00-0.00  |
|           | Apr 19 to Apr 25, 2021 | 30 | 0-0  | 0.00-0.00   | 0-0 | 0.00-0.00  |
|           | Apr 26 to May 2, 2021  | 34 | 0-4  | 0.00-13.33  | 0-0 | 0.00-0.00  |
|           | May 3 to May 9, 2021   | 42 | 2-13 | 6.90-44.83  | 0-0 | 0.00-0.00  |
|           | May 10 to May 16, 2021 | 35 | 0-7  | 0.00-25.00  | 0-0 | 0.00-0.00  |
|           | May 17 to May 23, 2021 | 22 | 0-0  | 0.00-0.00   | 0-7 | 0.00-24.14 |
|           | May 24 to May 30, 2021 | 29 | 0-0  | 0.00-0.00   | 0-0 | 0.00-0.00  |
| Yamagata  |                        |    |      |             |     |            |
|           | Apr 5 to Apr 11, 2021  | 32 | 0-0  | 0.00-0.00   | 0-7 | 0.00-17.95 |
|           | Apr 12 to Apr 18, 2021 | 34 | 0-0  | 0.00-0.00   | 0-4 | 0.00-10.53 |
|           | Apr 19 to Apr 25, 2021 | 34 | 0-0  | 0.00-0.00   | 0-3 | 0.00-8.11  |
|           | Apr 26 to May 2, 2021  | 42 | 0-5  | 0.00-13.51  | 0-0 | 0.00-0.00  |
|           | May 3 to May 9, 2021   | 46 | 0-9  | 0.00-24.32  | 0-0 | 0.00-0.00  |
|           | May 10 to May 16, 2021 | 47 | 0-10 | 0.00-27.03  | 0-0 | 0.00-0.00  |
|           | May 17 to May 23, 2021 | 49 | 0-12 | 0.00-32.43  | 0-0 | 0.00-0.00  |
|           | May 24 to May 30, 2021 | 56 | 7-19 | 18.92-51.35 | 0-0 | 0.00-0.00  |
| Fukushima |                        |    |      |             |     |            |
|           | Apr 5 to Apr 11, 2021  | 63 | 0-10 | 0.00-18.87  | 0-0 | 0.00-0.00  |
|           | Apr 12 to Apr 18, 2021 | 59 | 0-7  | 0.00-13.46  | 0-0 | 0.00-0.00  |
|           | Apr 19 to Apr 25, 2021 | 53 | 0-1  | 0.00-1.92   | 0-0 | 0.00-0.00  |
|           | Apr 26 to May 2, 2021  | 58 | 0-6  | 0.00-11.54  | 0-0 | 0.00-0.00  |
|           | May 3 to May 9, 2021   | 47 | 0-0  | 0.00-0.00   | 0-4 | 0.00-7.84  |
|           | May 10 to May 16, 2021 | 69 | 5-19 | 10.00-38.00 | 0-0 | 0.00-0.00  |
|           | May 17 to May 23, 2021 | 45 | 0-0  | 0.00-0.00   | 0-4 | 0.00-8.16  |
|           | May 24 to May 30, 2021 | 45 | 0-0  | 0.00-0.00   | 0-4 | 0.00-8.16  |
| Ibaraki   |                        |    |      |             |     |            |
|           | Apr 5 to Apr 11, 2021  | 59 | 0-0  | 0.00-0.00   | 0-4 | 0.00-6.35  |
|           | Apr 12 to Apr 18, 2021 | 68 | 0-6  | 0.00-9.68   | 0-0 | 0.00-0.00  |
|           | Apr 19 to Apr 25, 2021 | 58 | 0-0  | 0.00-0.00   | 0-3 | 0.00-4.92  |
|           | Apr 26 to May 2, 2021  | 60 | 0-1  | 0.00-1.69   | 0-0 | 0.00-0.00  |
|           | May 3 to May 9, 2021   | 65 | 0-8  | 0.00-14.04  | 0-0 | 0.00-0.00  |
|           | May 10 to May 16, 2021 | 70 | 0-14 | 0.00-25.00  | 0-0 | 0.00-0.00  |
|           | May 17 to May 23, 2021 | 48 | 0-0  | 0.00-0.00   | 0-7 | 0.00-12.73 |
|           | May 24 to May 30, 2021 | 78 | 5-22 | 8.93-39.29  | 0-0 | 0.00-0.00  |
| Tochigi   |                        |    |      |             |     |            |
|           | Apr 5 to Apr 11, 2021  | 50 | 0-6  | 0.00-13.64  | 0-0 | 0.00-0.00  |
|           | Apr 12 to Apr 18, 2021 | 54 | 0-10 | 0.00-22.73  | 0-0 | 0.00-0.00  |
|           | Apr 19 to Apr 25, 2021 | 52 | 0-9  | 0.00-20.93  | 0-0 | 0.00-0.00  |
|           | Apr 26 to May 2, 2021  | 43 | 0-2  | 0.00-4.88   | 0-0 | 0.00-0.00  |
|           | May 3 to May 9, 2021   | 34 | 0-0  | 0.00-0.00   | 0-6 | 0.00-15.00 |
|           | May 10 to May 16, 2021 | 41 | 0-2  | 0.00-5.13   | 0-0 | 0.00-0.00  |

|          |                        |     |       |             |     |            |
|----------|------------------------|-----|-------|-------------|-----|------------|
|          | May 17 to May 23, 2021 | 35  | 0-0   | 0.00-0.00   | 0-4 | 0.00-10.26 |
|          | May 24 to May 30, 2021 | 42  | 0-4   | 0.00-10.53  | 0-0 | 0.00-0.00  |
| Gunma    |                        |     |       |             |     |            |
|          | Apr 5 to Apr 11, 2021  | 35  | 0-0   | 0.00-0.00   | 0-5 | 0.00-12.50 |
|          | Apr 12 to Apr 18, 2021 | 49  | 0-10  | 0.00-25.64  | 0-0 | 0.00-0.00  |
|          | Apr 19 to Apr 25, 2021 | 58  | 8-21  | 21.62-56.76 | 0-0 | 0.00-0.00  |
|          | Apr 26 to May 2, 2021  | 46  | 0-9   | 0.00-24.32  | 0-0 | 0.00-0.00  |
|          | May 3 to May 9, 2021   | 52  | 2-15  | 5.41-40.54  | 0-0 | 0.00-0.00  |
|          | May 10 to May 16, 2021 | 28  | 0-0   | 0.00-0.00   | 0-7 | 0.00-20.00 |
|          | May 17 to May 23, 2021 | 32  | 0-0   | 0.00-0.00   | 0-3 | 0.00-8.57  |
|          | May 24 to May 30, 2021 | 43  | 0-6   | 0.00-16.22  | 0-0 | 0.00-0.00  |
| Saitama  |                        |     |       |             |     |            |
|          | Apr 5 to Apr 11, 2021  | 126 | 0-8   | 0.00-6.78   | 0-0 | 0.00-0.00  |
|          | Apr 12 to Apr 18, 2021 | 157 | 19-40 | 16.24-34.19 | 0-0 | 0.00-0.00  |
|          | Apr 19 to Apr 25, 2021 | 127 | 0-12  | 0.00-10.43  | 0-0 | 0.00-0.00  |
|          | Apr 26 to May 2, 2021  | 144 | 9-31  | 7.96-27.43  | 0-0 | 0.00-0.00  |
|          | May 3 to May 9, 2021   | 123 | 0-10  | 0.00-8.85   | 0-0 | 0.00-0.00  |
|          | May 10 to May 16, 2021 | 130 | 0-20  | 0.00-18.18  | 0-0 | 0.00-0.00  |
|          | May 17 to May 23, 2021 | 102 | 0-0   | 0.00-0.00   | 0-5 | 0.00-4.67  |
|          | May 24 to May 30, 2021 | 116 | 0-9   | 0.00-8.41   | 0-0 | 0.00-0.00  |
| Chiba    |                        |     |       |             |     |            |
|          | Apr 5 to Apr 11, 2021  | 121 | 0-5   | 0.00-4.31   | 0-0 | 0.00-0.00  |
|          | Apr 12 to Apr 18, 2021 | 110 | 0-0   | 0.00-0.00   | 0-5 | 0.00-4.35  |
|          | Apr 19 to Apr 25, 2021 | 116 | 0-3   | 0.00-2.65   | 0-0 | 0.00-0.00  |
|          | Apr 26 to May 2, 2021  | 128 | 0-19  | 0.00-17.43  | 0-0 | 0.00-0.00  |
|          | May 3 to May 9, 2021   | 126 | 0-17  | 0.00-15.60  | 0-0 | 0.00-0.00  |
|          | May 10 to May 16, 2021 | 127 | 0-17  | 0.00-15.45  | 0-0 | 0.00-0.00  |
|          | May 17 to May 23, 2021 | 112 | 0-2   | 0.00-1.82   | 0-0 | 0.00-0.00  |
|          | May 24 to May 30, 2021 | 110 | 0-0   | 0.00-0.00   | 0-0 | 0.00-0.00  |
| Tokyo    |                        |     |       |             |     |            |
|          | Apr 5 to Apr 11, 2021  | 255 | 0-21  | 0.00-8.97   | 0-0 | 0.00-0.00  |
|          | Apr 12 to Apr 18, 2021 | 259 | 0-27  | 0.00-11.64  | 0-0 | 0.00-0.00  |
|          | Apr 19 to Apr 25, 2021 | 268 | 7-39  | 3.06-17.03  | 0-0 | 0.00-0.00  |
|          | Apr 26 to May 2, 2021  | 270 | 14-45 | 6.22-20.00  | 0-0 | 0.00-0.00  |
|          | May 3 to May 9, 2021   | 255 | 2-33  | 0.90-14.86  | 0-0 | 0.00-0.00  |
|          | May 10 to May 16, 2021 | 268 | 18-49 | 8.22-22.37  | 0-0 | 0.00-0.00  |
|          | May 17 to May 23, 2021 | 243 | 0-28  | 0.00-13.02  | 0-0 | 0.00-0.00  |
|          | May 24 to May 30, 2021 | 243 | 0-28  | 0.00-13.02  | 0-0 | 0.00-0.00  |
| Kanagawa |                        |     |       |             |     |            |
|          | Apr 5 to Apr 11, 2021  | 184 | 0-0   | 0.00-0.00   | 0-9 | 0.00-4.66  |
|          | Apr 12 to Apr 18, 2021 | 225 | 5-34  | 2.62-17.80  | 0-0 | 0.00-0.00  |
|          | Apr 19 to Apr 25, 2021 | 187 | 0-0   | 0.00-0.00   | 0-2 | 0.00-1.06  |
|          | Apr 26 to May 2, 2021  | 226 | 10-39 | 5.35-20.86  | 0-0 | 0.00-0.00  |
|          | May 3 to May 9, 2021   | 222 | 10-38 | 5.43-20.65  | 0-0 | 0.00-0.00  |
|          | May 10 to May 16, 2021 | 225 | 11-40 | 5.95-21.62  | 0-0 | 0.00-0.00  |
|          | May 17 to May 23, 2021 | 201 | 0-19  | 0.00-10.44  | 0-0 | 0.00-0.00  |

|                        |                        |     |           |             |           |            |
|------------------------|------------------------|-----|-----------|-------------|-----------|------------|
| Niigata                | May 24 to May 30, 2021 | 226 | 20-48     | 11.24-26.97 | 0-0       | 0.00-0.00  |
|                        | Apr 5 to Apr 11, 2021  | 66  | 0-0       | 0.00-0.00   | 0-9       | 0.00-12.00 |
|                        | Apr 12 to Apr 18, 2021 | 87  | 0-15      | 0.00-20.83  | 0-0       | 0.00-0.00  |
|                        | Apr 19 to Apr 25, 2021 | 76  | 0-5       | 0.00-7.04   | 0-0       | 0.00-0.00  |
|                        | Apr 26 to May 2, 2021  | 69  | 0-0       | 0.00-0.00   | 0-1       | 0.00-1.43  |
|                        | May 3 to May 9, 2021   | 77  | 0-6       | 0.00-8.45   | 0-0       | 0.00-0.00  |
|                        | May 10 to May 16, 2021 | 69  | 0-0       | 0.00-0.00   | 0-2       | 0.00-2.82  |
|                        | May 17 to May 23, 2021 | 62  | 0-0       | 0.00-0.00   | 0-8       | 0.00-11.43 |
| May 24 to May 30, 2021 | 65                     | 0-0 | 0.00-0.00 | 0-3         | 0.00-4.41 |            |
| Toyama                 | Apr 5 to Apr 11, 2021  | 22  | 0-0       | 0.00-0.00   | 0-9       | 0.00-29.03 |
|                        | Apr 12 to Apr 18, 2021 | 24  | 0-0       | 0.00-0.00   | 0-5       | 0.00-17.24 |
|                        | Apr 19 to Apr 25, 2021 | 35  | 0-7       | 0.00-25.00  | 0-0       | 0.00-0.00  |
|                        | Apr 26 to May 2, 2021  | 38  | 0-10      | 0.00-35.71  | 0-0       | 0.00-0.00  |
|                        | May 3 to May 9, 2021   | 31  | 0-4       | 0.00-14.81  | 0-0       | 0.00-0.00  |
|                        | May 10 to May 16, 2021 | 27  | 0-0       | 0.00-0.00   | 0-0       | 0.00-0.00  |
|                        | May 17 to May 23, 2021 | 26  | 0-0       | 0.00-0.00   | 0-0       | 0.00-0.00  |
|                        | May 24 to May 30, 2021 | 23  | 0-0       | 0.00-0.00   | 0-3       | 0.00-11.54 |
| Ishikawa               | Apr 5 to Apr 11, 2021  | 23  | 0-0       | 0.00-0.00   | 0-1       | 0.00-4.17  |
|                        | Apr 12 to Apr 18, 2021 | 24  | 0-1       | 0.00-4.35   | 0-0       | 0.00-0.00  |
|                        | Apr 19 to Apr 25, 2021 | 26  | 0-4       | 0.00-18.18  | 0-0       | 0.00-0.00  |
|                        | Apr 26 to May 2, 2021  | 14  | 0-0       | 0.00-0.00   | 0-8       | 0.00-36.36 |
|                        | May 3 to May 9, 2021   | 22  | 0-0       | 0.00-0.00   | 0-0       | 0.00-0.00  |
|                        | May 10 to May 16, 2021 | 23  | 0-1       | 0.00-4.55   | 0-0       | 0.00-0.00  |
|                        | May 17 to May 23, 2021 | 21  | 0-0       | 0.00-0.00   | 0-1       | 0.00-4.55  |
|                        | May 24 to May 30, 2021 | 21  | 0-0       | 0.00-0.00   | 0-0       | 0.00-0.00  |
| Fukui                  | Apr 5 to Apr 11, 2021  | 17  | 0-0       | 0.00-0.00   | 0-0       | 0.00-0.00  |
|                        | Apr 12 to Apr 18, 2021 | 17  | 0-1       | 0.00-6.25   | 0-0       | 0.00-0.00  |
|                        | Apr 19 to Apr 25, 2021 | 25  | 1-9       | 6.25-56.25  | 0-0       | 0.00-0.00  |
|                        | Apr 26 to May 2, 2021  | 16  | 0-0       | 0.00-0.00   | 0-0       | 0.00-0.00  |
|                        | May 3 to May 9, 2021   | 25  | 1-9       | 6.25-56.25  | 0-0       | 0.00-0.00  |
|                        | May 10 to May 16, 2021 | 20  | 0-4       | 0.00-25.00  | 0-0       | 0.00-0.00  |
|                        | May 17 to May 23, 2021 | 23  | 0-8       | 0.00-53.33  | 0-0       | 0.00-0.00  |
|                        | May 24 to May 30, 2021 | 18  | 0-2       | 0.00-12.50  | 0-0       | 0.00-0.00  |
| Yamanashi              | Apr 5 to Apr 11, 2021  | 26  | 0-5       | 0.00-23.81  | 0-0       | 0.00-0.00  |
|                        | Apr 12 to Apr 18, 2021 | 21  | 0-0       | 0.00-0.00   | 0-0       | 0.00-0.00  |
|                        | Apr 19 to Apr 25, 2021 | 21  | 0-1       | 0.00-5.00   | 0-0       | 0.00-0.00  |
|                        | Apr 26 to May 2, 2021  | 27  | 0-8       | 0.00-42.11  | 0-0       | 0.00-0.00  |
|                        | May 3 to May 9, 2021   | 23  | 0-5       | 0.00-27.78  | 0-0       | 0.00-0.00  |
|                        | May 10 to May 16, 2021 | 20  | 0-2       | 0.00-11.11  | 0-0       | 0.00-0.00  |
|                        | May 17 to May 23, 2021 | 21  | 0-3       | 0.00-16.67  | 0-0       | 0.00-0.00  |
|                        | May 24 to May 30, 2021 | 20  | 0-3       | 0.00-17.65  | 0-0       | 0.00-0.00  |



Nagano

|                        |    |      |             |     |           |
|------------------------|----|------|-------------|-----|-----------|
| Apr 5 to Apr 11, 2021  | 67 | 0-1  | 0.00-1.52   | 0-0 | 0.00-0.00 |
| Apr 12 to Apr 18, 2021 | 63 | 0-0  | 0.00-0.00   | 0-0 | 0.00-0.00 |
| Apr 19 to Apr 25, 2021 | 65 | 0-3  | 0.00-4.84   | 0-0 | 0.00-0.00 |
| Apr 26 to May 2, 2021  | 81 | 2-18 | 3.17-28.57  | 0-0 | 0.00-0.00 |
| May 3 to May 9, 2021   | 69 | 0-6  | 0.00-9.52   | 0-0 | 0.00-0.00 |
| May 10 to May 16, 2021 | 64 | 0-4  | 0.00-6.67   | 0-0 | 0.00-0.00 |
| May 17 to May 23, 2021 | 83 | 8-24 | 13.56-40.68 | 0-0 | 0.00-0.00 |
| May 24 to May 30, 2021 | 60 | 0-3  | 0.00-5.26   | 0-0 | 0.00-0.00 |

Gifu

|                        |    |      |             |     |           |
|------------------------|----|------|-------------|-----|-----------|
| Apr 5 to Apr 11, 2021  | 57 | 0-4  | 0.00-7.55   | 0-0 | 0.00-0.00 |
| Apr 12 to Apr 18, 2021 | 60 | 0-8  | 0.00-15.38  | 0-0 | 0.00-0.00 |
| Apr 19 to Apr 25, 2021 | 48 | 0-0  | 0.00-0.00   | 0-4 | 0.00-7.69 |
| Apr 26 to May 2, 2021  | 55 | 0-5  | 0.00-10.00  | 0-0 | 0.00-0.00 |
| May 3 to May 9, 2021   | 54 | 0-6  | 0.00-12.50  | 0-0 | 0.00-0.00 |
| May 10 to May 16, 2021 | 53 | 0-7  | 0.00-15.22  | 0-0 | 0.00-0.00 |
| May 17 to May 23, 2021 | 65 | 7-21 | 15.91-47.73 | 0-0 | 0.00-0.00 |
| May 24 to May 30, 2021 | 44 | 0-0  | 0.00-0.00   | 0-1 | 0.00-2.22 |

Shizuoka

|                        |     |      |            |     |           |
|------------------------|-----|------|------------|-----|-----------|
| Apr 5 to Apr 11, 2021  | 125 | 0-7  | 0.00-5.93  | 0-0 | 0.00-0.00 |
| Apr 12 to Apr 18, 2021 | 123 | 0-9  | 0.00-7.89  | 0-0 | 0.00-0.00 |
| Apr 19 to Apr 25, 2021 | 124 | 0-11 | 0.00-9.73  | 0-0 | 0.00-0.00 |
| Apr 26 to May 2, 2021  | 136 | 1-24 | 0.89-21.43 | 0-0 | 0.00-0.00 |
| May 3 to May 9, 2021   | 136 | 5-27 | 4.59-24.77 | 0-0 | 0.00-0.00 |
| May 10 to May 16, 2021 | 109 | 0-1  | 0.00-0.93  | 0-0 | 0.00-0.00 |
| May 17 to May 23, 2021 | 122 | 0-17 | 0.00-16.19 | 0-0 | 0.00-0.00 |
| May 24 to May 30, 2021 | 102 | 0-0  | 0.00-0.00  | 0-3 | 0.00-2.86 |

Aichi

|                        |     |      |            |     |           |
|------------------------|-----|------|------------|-----|-----------|
| Apr 5 to Apr 11, 2021  | 153 | 0-0  | 0.00-0.00  | 0-8 | 0.00-4.97 |
| Apr 12 to Apr 18, 2021 | 186 | 0-26 | 0.00-16.25 | 0-0 | 0.00-0.00 |
| Apr 19 to Apr 25, 2021 | 174 | 0-18 | 0.00-11.54 | 0-0 | 0.00-0.00 |
| Apr 26 to May 2, 2021  | 170 | 0-16 | 0.00-10.39 | 0-0 | 0.00-0.00 |
| May 3 to May 9, 2021   | 168 | 0-15 | 0.00-9.80  | 0-0 | 0.00-0.00 |
| May 10 to May 16, 2021 | 173 | 0-23 | 0.00-15.33 | 0-0 | 0.00-0.00 |
| May 17 to May 23, 2021 | 147 | 0-0  | 0.00-0.00  | 0-1 | 0.00-0.68 |
| May 24 to May 30, 2021 | 157 | 0-12 | 0.00-8.28  | 0-0 | 0.00-0.00 |

Mie

|                        |    |       |             |     |           |
|------------------------|----|-------|-------------|-----|-----------|
| Apr 5 to Apr 11, 2021  | 52 | 0-0   | 0.00-0.00   | 0-3 | 0.00-5.45 |
| Apr 12 to Apr 18, 2021 | 50 | 0-0   | 0.00-0.00   | 0-3 | 0.00-5.66 |
| Apr 19 to Apr 25, 2021 | 60 | 0-8   | 0.00-15.38  | 0-0 | 0.00-0.00 |
| Apr 26 to May 2, 2021  | 56 | 0-4   | 0.00-7.69   | 0-0 | 0.00-0.00 |
| May 3 to May 9, 2021   | 65 | 0-14  | 0.00-27.45  | 0-0 | 0.00-0.00 |
| May 10 to May 16, 2021 | 57 | 0-5   | 0.00-9.62   | 0-0 | 0.00-0.00 |
| May 17 to May 23, 2021 | 76 | 10-25 | 19.61-49.02 | 0-0 | 0.00-0.00 |
| May 24 to May 30, 2021 | 52 | 0-2   | 0.00-4.00   | 0-0 | 0.00-0.00 |

Shiga

|          |                        |     |       |             |     |            |
|----------|------------------------|-----|-------|-------------|-----|------------|
|          | Apr 5 to Apr 11, 2021  | 23  | 0-0   | 0.00-0.00   | 0-2 | 0.00-8.00  |
|          | Apr 12 to Apr 18, 2021 | 28  | 0-3   | 0.00-12.00  | 0-0 | 0.00-0.00  |
|          | Apr 19 to Apr 25, 2021 | 24  | 0-0   | 0.00-0.00   | 0-1 | 0.00-4.00  |
|          | Apr 26 to May 2, 2021  | 36  | 2-12  | 8.33-50.00  | 0-0 | 0.00-0.00  |
|          | May 3 to May 9, 2021   | 42  | 9-19  | 39.13-82.61 | 0-0 | 0.00-0.00  |
|          | May 10 to May 16, 2021 | 33  | 0-10  | 0.00-43.48  | 0-0 | 0.00-0.00  |
|          | May 17 to May 23, 2021 | 21  | 0-0   | 0.00-0.00   | 0-3 | 0.00-12.50 |
|          | May 24 to May 30, 2021 | 32  | 0-8   | 0.00-33.33  | 0-0 | 0.00-0.00  |
| Kyoto    |                        |     |       |             |     |            |
|          | Apr 5 to Apr 11, 2021  | 52  | 0-2   | 0.00-4.00   | 0-0 | 0.00-0.00  |
|          | Apr 12 to Apr 18, 2021 | 65  | 0-16  | 0.00-32.65  | 0-0 | 0.00-0.00  |
|          | Apr 19 to Apr 25, 2021 | 59  | 0-10  | 0.00-20.41  | 0-0 | 0.00-0.00  |
|          | Apr 26 to May 2, 2021  | 52  | 0-3   | 0.00-6.12   | 0-0 | 0.00-0.00  |
|          | May 3 to May 9, 2021   | 68  | 4-20  | 8.33-41.67  | 0-0 | 0.00-0.00  |
|          | May 10 to May 16, 2021 | 45  | 0-0   | 0.00-0.00   | 0-3 | 0.00-6.25  |
|          | May 17 to May 23, 2021 | 48  | 0-2   | 0.00-4.35   | 0-0 | 0.00-0.00  |
|          | May 24 to May 30, 2021 | 50  | 0-5   | 0.00-11.11  | 0-0 | 0.00-0.00  |
| Osaka    |                        |     |       |             |     |            |
|          | Apr 5 to Apr 11, 2021  | 131 | 0-0   | 0.00-0.00   | 0-4 | 0.00-2.96  |
|          | Apr 12 to Apr 18, 2021 | 155 | 0-24  | 0.00-18.32  | 0-0 | 0.00-0.00  |
|          | Apr 19 to Apr 25, 2021 | 143 | 0-15  | 0.00-11.72  | 0-0 | 0.00-0.00  |
|          | Apr 26 to May 2, 2021  | 155 | 2-28  | 1.57-22.05  | 0-0 | 0.00-0.00  |
|          | May 3 to May 9, 2021   | 133 | 0-8   | 0.00-6.40   | 0-0 | 0.00-0.00  |
|          | May 10 to May 16, 2021 | 166 | 17-42 | 13.71-33.87 | 0-0 | 0.00-0.00  |
|          | May 17 to May 23, 2021 | 149 | 0-26  | 0.00-21.14  | 0-0 | 0.00-0.00  |
|          | May 24 to May 30, 2021 | 125 | 0-2   | 0.00-1.63   | 0-0 | 0.00-0.00  |
| Hyogo    |                        |     |       |             |     |            |
|          | Apr 5 to Apr 11, 2021  | 113 | 0-5   | 0.00-4.63   | 0-0 | 0.00-0.00  |
|          | Apr 12 to Apr 18, 2021 | 114 | 0-7   | 0.00-6.54   | 0-0 | 0.00-0.00  |
|          | Apr 19 to Apr 25, 2021 | 133 | 8-29  | 7.69-27.88  | 0-0 | 0.00-0.00  |
|          | Apr 26 to May 2, 2021  | 130 | 6-27  | 5.83-26.21  | 0-0 | 0.00-0.00  |
|          | May 3 to May 9, 2021   | 128 | 5-26  | 4.90-25.49  | 0-0 | 0.00-0.00  |
|          | May 10 to May 16, 2021 | 120 | 0-18  | 0.00-17.65  | 0-0 | 0.00-0.00  |
|          | May 17 to May 23, 2021 | 130 | 9-30  | 9.00-30.00  | 0-0 | 0.00-0.00  |
|          | May 24 to May 30, 2021 | 96  | 0-0   | 0.00-0.00   | 0-2 | 0.00-2.04  |
| Nara     |                        |     |       |             |     |            |
|          | Apr 5 to Apr 11, 2021  | 26  | 0-0   | 0.00-0.00   | 0-4 | 0.00-13.33 |
|          | Apr 12 to Apr 18, 2021 | 26  | 0-0   | 0.00-0.00   | 0-4 | 0.00-13.33 |
|          | Apr 19 to Apr 25, 2021 | 34  | 0-4   | 0.00-13.33  | 0-0 | 0.00-0.00  |
|          | Apr 26 to May 2, 2021  | 32  | 0-2   | 0.00-6.67   | 0-0 | 0.00-0.00  |
|          | May 3 to May 9, 2021   | 21  | 0-0   | 0.00-0.00   | 0-6 | 0.00-22.22 |
|          | May 10 to May 16, 2021 | 34  | 0-7   | 0.00-25.93  | 0-0 | 0.00-0.00  |
|          | May 17 to May 23, 2021 | 41  | 4-14  | 14.81-51.85 | 0-0 | 0.00-0.00  |
|          | May 24 to May 30, 2021 | 36  | 0-10  | 0.00-38.46  | 0-0 | 0.00-0.00  |
| Wakayama |                        |     |       |             |     |            |
|          | Apr 5 to Apr 11, 2021  | 23  | 0-0   | 0.00-0.00   | 0-7 | 0.00-23.33 |

|           |                        |    |      |             |     |            |
|-----------|------------------------|----|------|-------------|-----|------------|
|           | Apr 12 to Apr 18, 2021 | 35 | 0-6  | 0.00-20.69  | 0-0 | 0.00-0.00  |
|           | Apr 19 to Apr 25, 2021 | 31 | 0-3  | 0.00-10.71  | 0-0 | 0.00-0.00  |
|           | Apr 26 to May 2, 2021  | 24 | 0-0  | 0.00-0.00   | 0-3 | 0.00-11.11 |
|           | May 3 to May 9, 2021   | 31 | 0-3  | 0.00-10.71  | 0-0 | 0.00-0.00  |
|           | May 10 to May 16, 2021 | 31 | 0-3  | 0.00-10.71  | 0-0 | 0.00-0.00  |
|           | May 17 to May 23, 2021 | 30 | 0-2  | 0.00-7.14   | 0-0 | 0.00-0.00  |
|           | May 24 to May 30, 2021 | 29 | 0-0  | 0.00-0.00   | 0-0 | 0.00-0.00  |
| Tottori   |                        |    |      |             |     |            |
|           | Apr 5 to Apr 11, 2021  | 17 | 0-0  | 0.00-0.00   | 0-3 | 0.00-15.00 |
|           | Apr 12 to Apr 18, 2021 | 23 | 0-4  | 0.00-21.05  | 0-0 | 0.00-0.00  |
|           | Apr 19 to Apr 25, 2021 | 18 | 0-0  | 0.00-0.00   | 0-0 | 0.00-0.00  |
|           | Apr 26 to May 2, 2021  | 12 | 0-0  | 0.00-0.00   | 0-6 | 0.00-33.33 |
|           | May 3 to May 9, 2021   | 25 | 0-7  | 0.00-38.89  | 0-0 | 0.00-0.00  |
|           | May 10 to May 16, 2021 | 22 | 0-3  | 0.00-15.79  | 0-0 | 0.00-0.00  |
|           | May 17 to May 23, 2021 | 26 | 0-8  | 0.00-44.44  | 0-0 | 0.00-0.00  |
|           | May 24 to May 30, 2021 | 23 | 0-5  | 0.00-27.78  | 0-0 | 0.00-0.00  |
| Shimane   |                        |    |      |             |     |            |
|           | Apr 5 to Apr 11, 2021  | 24 | 0-2  | 0.00-9.09   | 0-0 | 0.00-0.00  |
|           | Apr 12 to Apr 18, 2021 | 29 | 0-7  | 0.00-31.82  | 0-0 | 0.00-0.00  |
|           | Apr 19 to Apr 25, 2021 | 24 | 0-3  | 0.00-14.29  | 0-0 | 0.00-0.00  |
|           | Apr 26 to May 2, 2021  | 24 | 0-3  | 0.00-14.29  | 0-0 | 0.00-0.00  |
|           | May 3 to May 9, 2021   | 19 | 0-0  | 0.00-0.00   | 0-0 | 0.00-0.00  |
|           | May 10 to May 16, 2021 | 22 | 0-3  | 0.00-15.79  | 0-0 | 0.00-0.00  |
|           | May 17 to May 23, 2021 | 22 | 0-4  | 0.00-22.22  | 0-0 | 0.00-0.00  |
|           | May 24 to May 30, 2021 | 22 | 0-4  | 0.00-22.22  | 0-0 | 0.00-0.00  |
| Okayama   |                        |    |      |             |     |            |
|           | Apr 5 to Apr 11, 2021  | 41 | 0-0  | 0.00-0.00   | 0-0 | 0.00-0.00  |
|           | Apr 12 to Apr 18, 2021 | 48 | 0-9  | 0.00-23.08  | 0-0 | 0.00-0.00  |
|           | Apr 19 to Apr 25, 2021 | 37 | 0-0  | 0.00-0.00   | 0-1 | 0.00-2.63  |
|           | Apr 26 to May 2, 2021  | 40 | 0-2  | 0.00-5.26   | 0-0 | 0.00-0.00  |
|           | May 3 to May 9, 2021   | 40 | 0-3  | 0.00-8.11   | 0-0 | 0.00-0.00  |
|           | May 10 to May 16, 2021 | 42 | 0-5  | 0.00-13.51  | 0-0 | 0.00-0.00  |
|           | May 17 to May 23, 2021 | 43 | 0-6  | 0.00-16.22  | 0-0 | 0.00-0.00  |
|           | May 24 to May 30, 2021 | 44 | 0-7  | 0.00-18.92  | 0-0 | 0.00-0.00  |
| Hiroshima |                        |    |      |             |     |            |
|           | Apr 5 to Apr 11, 2021  | 59 | 0-0  | 0.00-0.00   | 0-4 | 0.00-6.35  |
|           | Apr 12 to Apr 18, 2021 | 56 | 0-0  | 0.00-0.00   | 0-5 | 0.00-8.20  |
|           | Apr 19 to Apr 25, 2021 | 58 | 0-0  | 0.00-0.00   | 0-1 | 0.00-1.69  |
|           | Apr 26 to May 2, 2021  | 75 | 2-18 | 3.51-31.58  | 0-0 | 0.00-0.00  |
|           | May 3 to May 9, 2021   | 76 | 6-21 | 10.91-38.18 | 0-0 | 0.00-0.00  |
|           | May 10 to May 16, 2021 | 60 | 0-7  | 0.00-13.21  | 0-0 | 0.00-0.00  |
|           | May 17 to May 23, 2021 | 63 | 0-11 | 0.00-21.15  | 0-0 | 0.00-0.00  |
|           | May 24 to May 30, 2021 | 56 | 0-5  | 0.00-9.80   | 0-0 | 0.00-0.00  |
| Yamaguchi |                        |    |      |             |     |            |
|           | Apr 5 to Apr 11, 2021  | 35 | 0-2  | 0.00-6.06   | 0-0 | 0.00-0.00  |
|           | Apr 12 to Apr 18, 2021 | 44 | 0-12 | 0.00-37.50  | 0-0 | 0.00-0.00  |

|           |                        |    |      |             |      |             |
|-----------|------------------------|----|------|-------------|------|-------------|
|           | Apr 19 to Apr 25, 2021 | 32 | 0-0  | 0.00-0.00   | 0-0  | 0.00-0.00   |
|           | Apr 26 to May 2, 2021  | 38 | 0-6  | 0.00-18.75  | 0-0  | 0.00-0.00   |
|           | May 3 to May 9, 2021   | 37 | 0-5  | 0.00-15.63  | 0-0  | 0.00-0.00   |
|           | May 10 to May 16, 2021 | 21 | 0-0  | 0.00-0.00   | 0-11 | 0.00-34.38  |
|           | May 17 to May 23, 2021 | 45 | 2-13 | 6.25-40.63  | 0-0  | 0.00-0.00   |
|           | May 24 to May 30, 2021 | 26 | 0-0  | 0.00-0.00   | 0-5  | 0.00-16.13  |
| Tokushima |                        |    |      |             |      |             |
|           | Apr 5 to Apr 11, 2021  | 19 | 0-0  | 0.00-0.00   | 0-1  | 0.00-5.00   |
|           | Apr 12 to Apr 18, 2021 | 25 | 0-5  | 0.00-25.00  | 0-0  | 0.00-0.00   |
|           | Apr 19 to Apr 25, 2021 | 19 | 0-0  | 0.00-0.00   | 0-0  | 0.00-0.00   |
|           | Apr 26 to May 2, 2021  | 15 | 0-0  | 0.00-0.00   | 0-4  | 0.00-21.05  |
|           | May 3 to May 9, 2021   | 21 | 0-1  | 0.00-5.00   | 0-0  | 0.00-0.00   |
|           | May 10 to May 16, 2021 | 16 | 0-0  | 0.00-0.00   | 0-4  | 0.00-20.00  |
|           | May 17 to May 23, 2021 | 23 | 0-4  | 0.00-21.05  | 0-0  | 0.00-0.00   |
|           | May 24 to May 30, 2021 | 16 | 0-0  | 0.00-0.00   | 0-4  | 0.00-20.00  |
| Kagawa    |                        |    |      |             |      |             |
|           | Apr 5 to Apr 11, 2021  | 26 | 0-0  | 0.00-0.00   | 0-5  | 0.00-16.13  |
|           | Apr 12 to Apr 18, 2021 | 34 | 0-3  | 0.00-9.68   | 0-0  | 0.00-0.00   |
|           | Apr 19 to Apr 25, 2021 | 28 | 0-0  | 0.00-0.00   | 0-2  | 0.00-6.67   |
|           | Apr 26 to May 2, 2021  | 45 | 3-15 | 10.00-50.00 | 0-0  | 0.00-0.00   |
|           | May 3 to May 9, 2021   | 32 | 0-2  | 0.00-6.67   | 0-0  | 0.00-0.00   |
|           | May 10 to May 16, 2021 | 31 | 0-2  | 0.00-6.90   | 0-0  | 0.00-0.00   |
|           | May 17 to May 23, 2021 | 38 | 0-9  | 0.00-31.03  | 0-0  | 0.00-0.00   |
|           | May 24 to May 30, 2021 | 33 | 0-5  | 0.00-17.86  | 0-0  | 0.00-0.00   |
| Ehime     |                        |    |      |             |      |             |
|           | Apr 5 to Apr 11, 2021  | 44 | 0-4  | 0.00-10.00  | 0-0  | 0.00-0.00   |
|           | Apr 12 to Apr 18, 2021 | 44 | 0-6  | 0.00-15.79  | 0-0  | 0.00-0.00   |
|           | Apr 19 to Apr 25, 2021 | 44 | 0-6  | 0.00-15.79  | 0-0  | 0.00-0.00   |
|           | Apr 26 to May 2, 2021  | 51 | 0-13 | 0.00-34.21  | 0-0  | 0.00-0.00   |
|           | May 3 to May 9, 2021   | 47 | 0-9  | 0.00-23.68  | 0-0  | 0.00-0.00   |
|           | May 10 to May 16, 2021 | 47 | 0-8  | 0.00-20.51  | 0-0  | 0.00-0.00   |
|           | May 17 to May 23, 2021 | 39 | 0-2  | 0.00-5.41   | 0-0  | 0.00-0.00   |
|           | May 24 to May 30, 2021 | 34 | 0-0  | 0.00-0.00   | 0-2  | 0.00-5.56   |
| Kochi     |                        |    |      |             |      |             |
|           | Apr 5 to Apr 11, 2021  | 20 | 0-3  | 0.00-17.65  | 0-0  | 0.00-0.00   |
|           | Apr 12 to Apr 18, 2021 | 17 | 0-0  | 0.00-0.00   | 0-0  | 0.00-0.00   |
|           | Apr 19 to Apr 25, 2021 | 30 | 5-13 | 29.41-76.47 | 0-0  | 0.00-0.00   |
|           | Apr 26 to May 2, 2021  | 14 | 0-0  | 0.00-0.00   | 0-2  | 0.00-12.50  |
|           | May 3 to May 9, 2021   | 18 | 0-2  | 0.00-12.50  | 0-0  | 0.00-0.00   |
|           | May 10 to May 16, 2021 | 7  | 0-0  | 0.00-0.00   | 2-9  | 12.50-56.25 |
|           | May 17 to May 23, 2021 | 21 | 0-5  | 0.00-31.25  | 0-0  | 0.00-0.00   |
|           | May 24 to May 30, 2021 | 20 | 0-3  | 0.00-17.65  | 0-0  | 0.00-0.00   |
| Fukuoka   |                        |    |      |             |      |             |
|           | Apr 5 to Apr 11, 2021  | 73 | 0-0  | 0.00-0.00   | 0-1  | 0.00-1.35   |
|           | Apr 12 to Apr 18, 2021 | 76 | 0-2  | 0.00-2.70   | 0-0  | 0.00-0.00   |
|           | Apr 19 to Apr 25, 2021 | 80 | 0-8  | 0.00-11.11  | 0-0  | 0.00-0.00   |

|          |                        |     |       |             |     |            |
|----------|------------------------|-----|-------|-------------|-----|------------|
|          | Apr 26 to May 2, 2021  | 81  | 0-10  | 0.00-14.08  | 0-0 | 0.00-0.00  |
|          | May 3 to May 9, 2021   | 86  | 0-16  | 0.00-22.86  | 0-0 | 0.00-0.00  |
|          | May 10 to May 16, 2021 | 104 | 17-35 | 24.64-50.72 | 0-0 | 0.00-0.00  |
|          | May 17 to May 23, 2021 | 72  | 0-3   | 0.00-4.35   | 0-0 | 0.00-0.00  |
|          | May 24 to May 30, 2021 | 71  | 0-2   | 0.00-2.90   | 0-0 | 0.00-0.00  |
| Saga     |                        |     |       |             |     |            |
|          | Apr 5 to Apr 11, 2021  | 21  | 0-3   | 0.00-16.67  | 0-0 | 0.00-0.00  |
|          | Apr 12 to Apr 18, 2021 | 20  | 0-3   | 0.00-17.65  | 0-0 | 0.00-0.00  |
|          | Apr 19 to Apr 25, 2021 | 12  | 0-0   | 0.00-0.00   | 0-5 | 0.00-29.41 |
|          | Apr 26 to May 2, 2021  | 14  | 0-0   | 0.00-0.00   | 0-3 | 0.00-17.65 |
|          | May 3 to May 9, 2021   | 24  | 0-7   | 0.00-41.18  | 0-0 | 0.00-0.00  |
|          | May 10 to May 16, 2021 | 16  | 0-0   | 0.00-0.00   | 0-1 | 0.00-5.88  |
|          | May 17 to May 23, 2021 | 16  | 0-0   | 0.00-0.00   | 0-0 | 0.00-0.00  |
|          | May 24 to May 30, 2021 | 19  | 0-3   | 0.00-18.75  | 0-0 | 0.00-0.00  |
| Nagasaki |                        |     |       |             |     |            |
|          | Apr 5 to Apr 11, 2021  | 38  | 0-10  | 0.00-35.71  | 0-0 | 0.00-0.00  |
|          | Apr 12 to Apr 18, 2021 | 28  | 0-1   | 0.00-3.70   | 0-0 | 0.00-0.00  |
|          | Apr 19 to Apr 25, 2021 | 35  | 0-9   | 0.00-34.62  | 0-0 | 0.00-0.00  |
|          | Apr 26 to May 2, 2021  | 34  | 0-9   | 0.00-36.00  | 0-0 | 0.00-0.00  |
|          | May 3 to May 9, 2021   | 39  | 5-15  | 20.83-62.50 | 0-0 | 0.00-0.00  |
|          | May 10 to May 16, 2021 | 31  | 0-6   | 0.00-24.00  | 0-0 | 0.00-0.00  |
|          | May 17 to May 23, 2021 | 32  | 0-8   | 0.00-33.33  | 0-0 | 0.00-0.00  |
|          | May 24 to May 30, 2021 | 46  | 12-22 | 50.00-91.67 | 0-0 | 0.00-0.00  |
| Kumamoto |                        |     |       |             |     |            |
|          | Apr 5 to Apr 11, 2021  | 40  | 0-0   | 0.00-0.00   | 0-0 | 0.00-0.00  |
|          | Apr 12 to Apr 18, 2021 | 50  | 0-11  | 0.00-28.21  | 0-0 | 0.00-0.00  |
|          | Apr 19 to Apr 25, 2021 | 39  | 0-1   | 0.00-2.63   | 0-0 | 0.00-0.00  |
|          | Apr 26 to May 2, 2021  | 39  | 0-1   | 0.00-2.63   | 0-0 | 0.00-0.00  |
|          | May 3 to May 9, 2021   | 63  | 12-25 | 31.58-65.79 | 0-0 | 0.00-0.00  |
|          | May 10 to May 16, 2021 | 45  | 0-7   | 0.00-18.42  | 0-0 | 0.00-0.00  |
|          | May 17 to May 23, 2021 | 42  | 0-4   | 0.00-10.53  | 0-0 | 0.00-0.00  |
|          | May 24 to May 30, 2021 | 50  | 0-11  | 0.00-28.21  | 0-0 | 0.00-0.00  |
| Oita     |                        |     |       |             |     |            |
|          | Apr 5 to Apr 11, 2021  | 25  | 0-0   | 0.00-0.00   | 0-4 | 0.00-13.79 |
|          | Apr 12 to Apr 18, 2021 | 25  | 0-0   | 0.00-0.00   | 0-5 | 0.00-16.67 |
|          | Apr 19 to Apr 25, 2021 | 27  | 0-0   | 0.00-0.00   | 0-2 | 0.00-6.90  |
|          | Apr 26 to May 2, 2021  | 35  | 0-7   | 0.00-25.00  | 0-0 | 0.00-0.00  |
|          | May 3 to May 9, 2021   | 26  | 0-0   | 0.00-0.00   | 0-1 | 0.00-3.70  |
|          | May 10 to May 16, 2021 | 34  | 0-7   | 0.00-25.93  | 0-0 | 0.00-0.00  |
|          | May 17 to May 23, 2021 | 24  | 0-0   | 0.00-0.00   | 0-3 | 0.00-11.11 |
|          | May 24 to May 30, 2021 | 27  | 0-1   | 0.00-3.85   | 0-0 | 0.00-0.00  |
| Miyazaki |                        |     |       |             |     |            |
|          | Apr 5 to Apr 11, 2021  | 29  | 0-6   | 0.00-26.09  | 0-0 | 0.00-0.00  |
|          | Apr 12 to Apr 18, 2021 | 24  | 0-1   | 0.00-4.35   | 0-0 | 0.00-0.00  |
|          | Apr 19 to Apr 25, 2021 | 36  | 4-13  | 17.39-56.52 | 0-0 | 0.00-0.00  |
|          | Apr 26 to May 2, 2021  | 23  | 0-1   | 0.00-4.55   | 0-0 | 0.00-0.00  |

|           |                        |    |      |             |     |            |
|-----------|------------------------|----|------|-------------|-----|------------|
|           | May 3 to May 9, 2021   | 33 | 3-12 | 14.29-57.14 | 0-0 | 0.00-0.00  |
|           | May 10 to May 16, 2021 | 23 | 0-2  | 0.00-9.52   | 0-0 | 0.00-0.00  |
|           | May 17 to May 23, 2021 | 25 | 0-4  | 0.00-19.05  | 0-0 | 0.00-0.00  |
|           | May 24 to May 30, 2021 | 27 | 0-6  | 0.00-28.57  | 0-0 | 0.00-0.00  |
| Kagoshima |                        |    |      |             |     |            |
|           | Apr 5 to Apr 11, 2021  | 41 | 0-1  | 0.00-2.50   | 0-0 | 0.00-0.00  |
|           | Apr 12 to Apr 18, 2021 | 47 | 0-8  | 0.00-20.51  | 0-0 | 0.00-0.00  |
|           | Apr 19 to Apr 25, 2021 | 36 | 0-0  | 0.00-0.00   | 0-2 | 0.00-5.26  |
|           | Apr 26 to May 2, 2021  | 35 | 0-0  | 0.00-0.00   | 0-3 | 0.00-7.89  |
|           | May 3 to May 9, 2021   | 34 | 0-0  | 0.00-0.00   | 0-4 | 0.00-10.53 |
|           | May 10 to May 16, 2021 | 38 | 0-0  | 0.00-0.00   | 0-0 | 0.00-0.00  |
|           | May 17 to May 23, 2021 | 43 | 0-5  | 0.00-13.16  | 0-0 | 0.00-0.00  |
|           | May 24 to May 30, 2021 | 44 | 0-5  | 0.00-12.82  | 0-0 | 0.00-0.00  |
| Okinawa   |                        |    |      |             |     |            |
|           | Apr 5 to Apr 11, 2021  | 30 | 0-7  | 0.00-30.43  | 0-0 | 0.00-0.00  |
|           | Apr 12 to Apr 18, 2021 | 25 | 0-3  | 0.00-13.64  | 0-0 | 0.00-0.00  |
|           | Apr 19 to Apr 25, 2021 | 24 | 0-3  | 0.00-14.29  | 0-0 | 0.00-0.00  |
|           | Apr 26 to May 2, 2021  | 30 | 0-9  | 0.00-42.86  | 0-0 | 0.00-0.00  |
|           | May 3 to May 9, 2021   | 26 | 0-6  | 0.00-30.00  | 0-0 | 0.00-0.00  |
|           | May 10 to May 16, 2021 | 30 | 0-9  | 0.00-42.86  | 0-0 | 0.00-0.00  |
|           | May 17 to May 23, 2021 | 21 | 0-1  | 0.00-5.00   | 0-0 | 0.00-0.00  |
|           | May 24 to May 30, 2021 | 32 | 2-12 | 10.00-60.00 | 0-0 | 0.00-0.00  |

---

**Table A.18: Weekly number of observed and excess/exiguous deaths in Japan and 47 prefectures for senility-related deaths in hospitals and clinics from January 2020 through May 2021.**

| Prefecture | Week                   | Observed | Excess deaths | Percent excess | Exiguous deaths | Percent exiguous |
|------------|------------------------|----------|---------------|----------------|-----------------|------------------|
| Japan      |                        |          |               |                |                 |                  |
|            | Apr 5 to Apr 11, 2021  | 3565     | 0–47          | 0.00–1.34      | 0–0             | 0.00–0.00        |
|            | Apr 12 to Apr 18, 2021 | 3840     | 148–361       | 4.25–10.38     | 0–0             | 0.00–0.00        |
|            | Apr 19 to Apr 25, 2021 | 3725     | 48–274        | 1.39–7.94      | 0–0             | 0.00–0.00        |
|            | Apr 26 to May 2, 2021  | 3863     | 217–439       | 6.34–12.82     | 0–0             | 0.00–0.00        |
|            | May 3 to May 9, 2021   | 3856     | 278–485       | 8.25–14.39     | 0–0             | 0.00–0.00        |
|            | May 10 to May 16, 2021 | 3753     | 202–405       | 6.03–12.10     | 0–0             | 0.00–0.00        |
|            | May 17 to May 23, 2021 | 3641     | 133–328       | 4.01–9.90      | 0–0             | 0.00–0.00        |
|            | May 24 to May 30, 2021 | 3494     | 0–190         | 0.00–5.75      | 0–0             | 0.00–0.00        |
| Hokkaido   |                        |          |               |                |                 |                  |
|            | Apr 5 to Apr 11, 2021  | 1278     | 0–76          | 0.00–6.32      | 0–0             | 0.00–0.00        |
|            | Apr 12 to Apr 18, 2021 | 1251     | 0–63          | 0.00–5.30      | 0–0             | 0.00–0.00        |
|            | Apr 19 to Apr 25, 2021 | 1198     | 0–23          | 0.00–1.96      | 0–0             | 0.00–0.00        |
|            | Apr 26 to May 2, 2021  | 1249     | 0–96          | 0.00–8.33      | 0–0             | 0.00–0.00        |
|            | May 3 to May 9, 2021   | 1230     | 5–100         | 0.44–8.85      | 0–0             | 0.00–0.00        |
|            | May 10 to May 16, 2021 | 1155     | 0–43          | 0.00–3.87      | 0–0             | 0.00–0.00        |
|            | May 17 to May 23, 2021 | 1083     | 0–0           | 0.00–0.00      | 0–18            | 0.00–1.63        |
|            | May 24 to May 30, 2021 | 1095     | 0–1           | 0.00–0.09      | 0–0             | 0.00–0.00        |
| Aomori     |                        |          |               |                |                 |                  |
|            | Apr 5 to Apr 11, 2021  | 336      | 0–0           | 0.00–0.00      | 0–4             | 0.00–1.18        |
|            | Apr 12 to Apr 18, 2021 | 324      | 0–0           | 0.00–0.00      | 0–12            | 0.00–3.57        |
|            | Apr 19 to Apr 25, 2021 | 309      | 0–0           | 0.00–0.00      | 0–26            | 0.00–7.76        |
|            | Apr 26 to May 2, 2021  | 344      | 0–16          | 0.00–4.88      | 0–0             | 0.00–0.00        |
|            | May 3 to May 9, 2021   | 344      | 0–22          | 0.00–6.83      | 0–0             | 0.00–0.00        |
|            | May 10 to May 16, 2021 | 305      | 0–0           | 0.00–0.00      | 0–10            | 0.00–3.17        |
|            | May 17 to May 23, 2021 | 317      | 0–4           | 0.00–1.28      | 0–0             | 0.00–0.00        |
|            | May 24 to May 30, 2021 | 291      | 0–0           | 0.00–0.00      | 0–15            | 0.00–4.90        |
| Iwate      |                        |          |               |                |                 |                  |
|            | Apr 5 to Apr 11, 2021  | 284      | 1–36          | 0.40–14.52     | 0–0             | 0.00–0.00        |
|            | Apr 12 to Apr 18, 2021 | 277      | 0–29          | 0.00–11.69     | 0–0             | 0.00–0.00        |
|            | Apr 19 to Apr 25, 2021 | 274      | 0–31          | 0.00–12.76     | 0–0             | 0.00–0.00        |
|            | Apr 26 to May 2, 2021  | 271      | 0–30          | 0.00–12.45     | 0–0             | 0.00–0.00        |
|            | May 3 to May 9, 2021   | 273      | 0–34          | 0.00–14.23     | 0–0             | 0.00–0.00        |
|            | May 10 to May 16, 2021 | 238      | 0–5           | 0.00–2.15      | 0–0             | 0.00–0.00        |
|            | May 17 to May 23, 2021 | 203      | 0–0           | 0.00–0.00      | 0–29            | 0.00–12.50       |
|            | May 24 to May 30, 2021 | 248      | 0–18          | 0.00–7.83      | 0–0             | 0.00–0.00        |
| Miyagi     |                        |          |               |                |                 |                  |
|            | Apr 5 to Apr 11, 2021  | 401      | 0–0           | 0.00–0.00      | 0–6             | 0.00–1.47        |
|            | Apr 12 to Apr 18, 2021 | 418      | 0–19          | 0.00–4.76      | 0–0             | 0.00–0.00        |
|            | Apr 19 to Apr 25, 2021 | 409      | 0–21          | 0.00–5.41      | 0–0             | 0.00–0.00        |
|            | Apr 26 to May 2, 2021  | 429      | 5–49          | 1.32–12.89     | 0–0             | 0.00–0.00        |
|            | May 3 to May 9, 2021   | 400      | 0–26          | 0.00–6.95      | 0–0             | 0.00–0.00        |

|           |                        |      |        |            |      |            |
|-----------|------------------------|------|--------|------------|------|------------|
|           | May 10 to May 16, 2021 | 410  | 0-40   | 0.00-10.81 | 0-0  | 0.00-0.00  |
|           | May 17 to May 23, 2021 | 417  | 10-55  | 2.76-15.19 | 0-0  | 0.00-0.00  |
|           | May 24 to May 30, 2021 | 356  | 0-0    | 0.00-0.00  | 0-4  | 0.00-1.11  |
| Akita     |                        |      |        |            |      |            |
|           | Apr 5 to Apr 11, 2021  | 369  | 0-14   | 0.00-3.94  | 0-0  | 0.00-0.00  |
|           | Apr 12 to Apr 18, 2021 | 360  | 0-6    | 0.00-1.69  | 0-0  | 0.00-0.00  |
|           | Apr 19 to Apr 25, 2021 | 352  | 0-2    | 0.00-0.57  | 0-0  | 0.00-0.00  |
|           | Apr 26 to May 2, 2021  | 368  | 0-22   | 0.00-6.36  | 0-0  | 0.00-0.00  |
|           | May 3 to May 9, 2021   | 354  | 0-12   | 0.00-3.51  | 0-0  | 0.00-0.00  |
|           | May 10 to May 16, 2021 | 371  | 0-37   | 0.00-11.08 | 0-0  | 0.00-0.00  |
|           | May 17 to May 23, 2021 | 362  | 0-29   | 0.00-8.71  | 0-0  | 0.00-0.00  |
|           | May 24 to May 30, 2021 | 325  | 0-0    | 0.00-0.00  | 0-5  | 0.00-1.52  |
| Yamagata  |                        |      |        |            |      |            |
|           | Apr 5 to Apr 11, 2021  | 271  | 0-6    | 0.00-2.26  | 0-0  | 0.00-0.00  |
|           | Apr 12 to Apr 18, 2021 | 262  | 0-0    | 0.00-0.00  | 0-2  | 0.00-0.76  |
|           | Apr 19 to Apr 25, 2021 | 307  | 16-48  | 6.18-18.53 | 0-0  | 0.00-0.00  |
|           | Apr 26 to May 2, 2021  | 271  | 0-13   | 0.00-5.04  | 0-0  | 0.00-0.00  |
|           | May 3 to May 9, 2021   | 288  | 0-32   | 0.00-12.50 | 0-0  | 0.00-0.00  |
|           | May 10 to May 16, 2021 | 264  | 0-12   | 0.00-4.76  | 0-0  | 0.00-0.00  |
|           | May 17 to May 23, 2021 | 263  | 0-13   | 0.00-5.20  | 0-0  | 0.00-0.00  |
|           | May 24 to May 30, 2021 | 248  | 0-1    | 0.00-0.40  | 0-0  | 0.00-0.00  |
| Fukushima |                        |      |        |            |      |            |
|           | Apr 5 to Apr 11, 2021  | 607  | 0-0    | 0.00-0.00  | 0-39 | 0.00-6.04  |
|           | Apr 12 to Apr 18, 2021 | 679  | 0-46   | 0.00-7.27  | 0-0  | 0.00-0.00  |
|           | Apr 19 to Apr 25, 2021 | 613  | 0-0    | 0.00-0.00  | 0-14 | 0.00-2.23  |
|           | Apr 26 to May 2, 2021  | 642  | 0-27   | 0.00-4.39  | 0-0  | 0.00-0.00  |
|           | May 3 to May 9, 2021   | 632  | 0-28   | 0.00-4.64  | 0-0  | 0.00-0.00  |
|           | May 10 to May 16, 2021 | 650  | 0-54   | 0.00-9.06  | 0-0  | 0.00-0.00  |
|           | May 17 to May 23, 2021 | 519  | 0-0    | 0.00-0.00  | 0-59 | 0.00-10.21 |
|           | May 24 to May 30, 2021 | 592  | 0-15   | 0.00-2.60  | 0-0  | 0.00-0.00  |
| Ibaraki   |                        |      |        |            |      |            |
|           | Apr 5 to Apr 11, 2021  | 1666 | 0-40   | 0.00-2.46  | 0-0  | 0.00-0.00  |
|           | Apr 12 to Apr 18, 2021 | 1702 | 0-85   | 0.00-5.26  | 0-0  | 0.00-0.00  |
|           | Apr 19 to Apr 25, 2021 | 1675 | 0-81   | 0.00-5.08  | 0-0  | 0.00-0.00  |
|           | Apr 26 to May 2, 2021  | 1755 | 65-182 | 4.13-11.57 | 0-0  | 0.00-0.00  |
|           | May 3 to May 9, 2021   | 1722 | 59-174 | 3.81-11.24 | 0-0  | 0.00-0.00  |
|           | May 10 to May 16, 2021 | 1647 | 0-114  | 0.00-7.44  | 0-0  | 0.00-0.00  |
|           | May 17 to May 23, 2021 | 1634 | 6-120  | 0.40-7.93  | 0-0  | 0.00-0.00  |
|           | May 24 to May 30, 2021 | 1576 | 0-80   | 0.00-5.35  | 0-0  | 0.00-0.00  |
| Tochigi   |                        |      |        |            |      |            |
|           | Apr 5 to Apr 11, 2021  | 193  | 0-5    | 0.00-2.66  | 0-0  | 0.00-0.00  |
|           | Apr 12 to Apr 18, 2021 | 199  | 0-12   | 0.00-6.42  | 0-0  | 0.00-0.00  |
|           | Apr 19 to Apr 25, 2021 | 209  | 0-25   | 0.00-13.59 | 0-0  | 0.00-0.00  |
|           | Apr 26 to May 2, 2021  | 196  | 0-14   | 0.00-7.69  | 0-0  | 0.00-0.00  |
|           | May 3 to May 9, 2021   | 177  | 0-0    | 0.00-0.00  | 0-1  | 0.00-0.56  |
|           | May 10 to May 16, 2021 | 193  | 0-16   | 0.00-9.04  | 0-0  | 0.00-0.00  |



|          |                        |     |       |            |      |           |
|----------|------------------------|-----|-------|------------|------|-----------|
|          | May 17 to May 23, 2021 | 194 | 0-20  | 0.00-11.49 | 0-0  | 0.00-0.00 |
|          | May 24 to May 30, 2021 | 203 | 1-31  | 0.58-18.02 | 0-0  | 0.00-0.00 |
| Gunma    |                        |     |       |            |      |           |
|          | Apr 5 to Apr 11, 2021  | 447 | 0-0   | 0.00-0.00  | 0-2  | 0.00-0.45 |
|          | Apr 12 to Apr 18, 2021 | 523 | 31-84 | 7.06-19.13 | 0-0  | 0.00-0.00 |
|          | Apr 19 to Apr 25, 2021 | 452 | 0-17  | 0.00-3.91  | 0-0  | 0.00-0.00 |
|          | Apr 26 to May 2, 2021  | 454 | 0-29  | 0.00-6.82  | 0-0  | 0.00-0.00 |
|          | May 3 to May 9, 2021   | 450 | 0-26  | 0.00-6.13  | 0-0  | 0.00-0.00 |
|          | May 10 to May 16, 2021 | 453 | 0-39  | 0.00-9.42  | 0-0  | 0.00-0.00 |
|          | May 17 to May 23, 2021 | 385 | 0-0   | 0.00-0.00  | 0-24 | 0.00-5.87 |
|          | May 24 to May 30, 2021 | 443 | 0-35  | 0.00-8.58  | 0-0  | 0.00-0.00 |
| Saitama  |                        |     |       |            |      |           |
|          | Apr 5 to Apr 11, 2021  | 346 | 0-0   | 0.00-0.00  | 0-15 | 0.00-4.16 |
|          | Apr 12 to Apr 18, 2021 | 382 | 0-28  | 0.00-7.91  | 0-0  | 0.00-0.00 |
|          | Apr 19 to Apr 25, 2021 | 395 | 2-45  | 0.57-12.86 | 0-0  | 0.00-0.00 |
|          | Apr 26 to May 2, 2021  | 390 | 2-43  | 0.58-12.39 | 0-0  | 0.00-0.00 |
|          | May 3 to May 9, 2021   | 369 | 0-28  | 0.00-8.21  | 0-0  | 0.00-0.00 |
|          | May 10 to May 16, 2021 | 325 | 0-0   | 0.00-0.00  | 0-13 | 0.00-3.85 |
|          | May 17 to May 23, 2021 | 363 | 0-28  | 0.00-8.36  | 0-0  | 0.00-0.00 |
|          | May 24 to May 30, 2021 | 363 | 0-36  | 0.00-11.01 | 0-0  | 0.00-0.00 |
| Chiba    |                        |     |       |            |      |           |
|          | Apr 5 to Apr 11, 2021  | 499 | 0-17  | 0.00-3.53  | 0-0  | 0.00-0.00 |
|          | Apr 12 to Apr 18, 2021 | 551 | 22-72 | 4.59-15.03 | 0-0  | 0.00-0.00 |
|          | Apr 19 to Apr 25, 2021 | 469 | 0-0   | 0.00-0.00  | 0-3  | 0.00-0.64 |
|          | Apr 26 to May 2, 2021  | 492 | 0-21  | 0.00-4.46  | 0-0  | 0.00-0.00 |
|          | May 3 to May 9, 2021   | 489 | 0-25  | 0.00-5.39  | 0-0  | 0.00-0.00 |
|          | May 10 to May 16, 2021 | 436 | 0-0   | 0.00-0.00  | 0-21 | 0.00-4.60 |
|          | May 17 to May 23, 2021 | 434 | 0-0   | 0.00-0.00  | 0-15 | 0.00-3.34 |
|          | May 24 to May 30, 2021 | 457 | 0-17  | 0.00-3.86  | 0-0  | 0.00-0.00 |
| Tokyo    |                        |     |       |            |      |           |
|          | Apr 5 to Apr 11, 2021  | 193 | 0-4   | 0.00-2.12  | 0-0  | 0.00-0.00 |
|          | Apr 12 to Apr 18, 2021 | 199 | 0-13  | 0.00-6.99  | 0-0  | 0.00-0.00 |
|          | Apr 19 to Apr 25, 2021 | 205 | 0-21  | 0.00-11.41 | 0-0  | 0.00-0.00 |
|          | Apr 26 to May 2, 2021  | 171 | 0-0   | 0.00-0.00  | 0-10 | 0.00-5.52 |
|          | May 3 to May 9, 2021   | 222 | 16-44 | 8.99-24.72 | 0-0  | 0.00-0.00 |
|          | May 10 to May 16, 2021 | 194 | 0-17  | 0.00-9.60  | 0-0  | 0.00-0.00 |
|          | May 17 to May 23, 2021 | 185 | 0-8   | 0.00-4.52  | 0-0  | 0.00-0.00 |
|          | May 24 to May 30, 2021 | 173 | 0-0   | 0.00-0.00  | 0-3  | 0.00-1.70 |
| Kanagawa |                        |     |       |            |      |           |
|          | Apr 5 to Apr 11, 2021  | 176 | 0-0   | 0.00-0.00  | 0-17 | 0.00-8.81 |
|          | Apr 12 to Apr 18, 2021 | 194 | 0-4   | 0.00-2.11  | 0-0  | 0.00-0.00 |
|          | Apr 19 to Apr 25, 2021 | 205 | 0-20  | 0.00-10.81 | 0-0  | 0.00-0.00 |
|          | Apr 26 to May 2, 2021  | 207 | 0-24  | 0.00-13.11 | 0-0  | 0.00-0.00 |
|          | May 3 to May 9, 2021   | 209 | 1-30  | 0.56-16.76 | 0-0  | 0.00-0.00 |
|          | May 10 to May 16, 2021 | 193 | 0-16  | 0.00-9.04  | 0-0  | 0.00-0.00 |
|          | May 17 to May 23, 2021 | 213 | 5-36  | 2.82-20.34 | 0-0  | 0.00-0.00 |

|                        |                        |      |           |            |           |            |
|------------------------|------------------------|------|-----------|------------|-----------|------------|
| Niigata                | May 24 to May 30, 2021 | 179  | 0-7       | 0.00-4.07  | 0-0       | 0.00-0.00  |
|                        | Apr 5 to Apr 11, 2021  | 277  | 0-0       | 0.00-0.00  | 0-9       | 0.00-3.15  |
|                        | Apr 12 to Apr 18, 2021 | 306  | 0-22      | 0.00-7.75  | 0-0       | 0.00-0.00  |
|                        | Apr 19 to Apr 25, 2021 | 316  | 0-35      | 0.00-12.46 | 0-0       | 0.00-0.00  |
|                        | Apr 26 to May 2, 2021  | 291  | 0-14      | 0.00-5.05  | 0-0       | 0.00-0.00  |
|                        | May 3 to May 9, 2021   | 263  | 0-0       | 0.00-0.00  | 0-9       | 0.00-3.31  |
|                        | May 10 to May 16, 2021 | 298  | 0-29      | 0.00-10.78 | 0-0       | 0.00-0.00  |
|                        | May 17 to May 23, 2021 | 267  | 0-2       | 0.00-0.75  | 0-0       | 0.00-0.00  |
| Toyama                 | May 24 to May 30, 2021 | 271  | 0-9       | 0.00-3.44  | 0-0       | 0.00-0.00  |
|                        | Apr 5 to Apr 11, 2021  | 430  | 0-26      | 0.00-6.44  | 0-0       | 0.00-0.00  |
|                        | Apr 12 to Apr 18, 2021 | 453  | 9-54      | 2.26-13.53 | 0-0       | 0.00-0.00  |
|                        | Apr 19 to Apr 25, 2021 | 444  | 6-50      | 1.52-12.69 | 0-0       | 0.00-0.00  |
|                        | Apr 26 to May 2, 2021  | 422  | 0-30      | 0.00-7.65  | 0-0       | 0.00-0.00  |
|                        | May 3 to May 9, 2021   | 422  | 0-38      | 0.00-9.90  | 0-0       | 0.00-0.00  |
|                        | May 10 to May 16, 2021 | 418  | 0-40      | 0.00-10.58 | 0-0       | 0.00-0.00  |
|                        | May 17 to May 23, 2021 | 395  | 0-21      | 0.00-5.61  | 0-0       | 0.00-0.00  |
| Ishikawa               | May 24 to May 30, 2021 | 404  | 0-35      | 0.00-9.49  | 0-0       | 0.00-0.00  |
|                        | Apr 5 to Apr 11, 2021  | 581  | 0-0       | 0.00-0.00  | 0-6       | 0.00-1.02  |
|                        | Apr 12 to Apr 18, 2021 | 619  | 0-34      | 0.00-5.81  | 0-0       | 0.00-0.00  |
|                        | Apr 19 to Apr 25, 2021 | 579  | 0-0       | 0.00-0.00  | 0-2       | 0.00-0.34  |
|                        | Apr 26 to May 2, 2021  | 591  | 0-19      | 0.00-3.32  | 0-0       | 0.00-0.00  |
|                        | May 3 to May 9, 2021   | 574  | 0-11      | 0.00-1.95  | 0-0       | 0.00-0.00  |
|                        | May 10 to May 16, 2021 | 573  | 0-20      | 0.00-3.62  | 0-0       | 0.00-0.00  |
|                        | May 17 to May 23, 2021 | 542  | 0-0       | 0.00-0.00  | 0-6       | 0.00-1.09  |
| Fukui                  | May 24 to May 30, 2021 | 560  | 0-19      | 0.00-3.51  | 0-0       | 0.00-0.00  |
|                        | Apr 5 to Apr 11, 2021  | 257  | 0-0       | 0.00-0.00  | 6-42      | 2.01-14.05 |
|                        | Apr 12 to Apr 18, 2021 | 302  | 0-6       | 0.00-2.03  | 0-0       | 0.00-0.00  |
|                        | Apr 19 to Apr 25, 2021 | 312  | 0-17      | 0.00-5.76  | 0-0       | 0.00-0.00  |
|                        | Apr 26 to May 2, 2021  | 273  | 0-0       | 0.00-0.00  | 0-17      | 0.00-5.86  |
|                        | May 3 to May 9, 2021   | 305  | 0-22      | 0.00-7.77  | 0-0       | 0.00-0.00  |
|                        | May 10 to May 16, 2021 | 323  | 6-42      | 2.14-14.95 | 0-0       | 0.00-0.00  |
|                        | May 17 to May 23, 2021 | 314  | 0-36      | 0.00-12.95 | 0-0       | 0.00-0.00  |
| Yamanashi              | May 24 to May 30, 2021 | 298  | 0-24      | 0.00-8.76  | 0-0       | 0.00-0.00  |
|                        | Apr 5 to Apr 11, 2021  | 261  | 0-20      | 0.00-8.30  | 0-0       | 0.00-0.00  |
|                        | Apr 12 to Apr 18, 2021 | 261  | 0-20      | 0.00-8.30  | 0-0       | 0.00-0.00  |
|                        | Apr 19 to Apr 25, 2021 | 257  | 0-21      | 0.00-8.90  | 0-0       | 0.00-0.00  |
|                        | Apr 26 to May 2, 2021  | 248  | 0-14      | 0.00-5.98  | 0-0       | 0.00-0.00  |
|                        | May 3 to May 9, 2021   | 224  | 0-0       | 0.00-0.00  | 0-10      | 0.00-4.27  |
|                        | May 10 to May 16, 2021 | 254  | 0-21      | 0.00-9.01  | 0-0       | 0.00-0.00  |
|                        | May 17 to May 23, 2021 | 244  | 0-11      | 0.00-4.72  | 0-0       | 0.00-0.00  |
| May 24 to May 30, 2021 | 248                    | 0-18 | 0.00-7.83 | 0-0        | 0.00-0.00 |            |

Nagano

|                        |     |      |            |     |           |
|------------------------|-----|------|------------|-----|-----------|
| Apr 5 to Apr 11, 2021  | 531 | 0-1  | 0.00-0.19  | 0-0 | 0.00-0.00 |
| Apr 12 to Apr 18, 2021 | 536 | 0-13 | 0.00-2.49  | 0-0 | 0.00-0.00 |
| Apr 19 to Apr 25, 2021 | 556 | 0-41 | 0.00-7.96  | 0-0 | 0.00-0.00 |
| Apr 26 to May 2, 2021  | 552 | 0-43 | 0.00-8.45  | 0-0 | 0.00-0.00 |
| May 3 to May 9, 2021   | 559 | 1-55 | 0.20-10.91 | 0-0 | 0.00-0.00 |
| May 10 to May 16, 2021 | 527 | 0-35 | 0.00-7.11  | 0-0 | 0.00-0.00 |
| May 17 to May 23, 2021 | 479 | 0-0  | 0.00-0.00  | 0-5 | 0.00-1.03 |
| May 24 to May 30, 2021 | 508 | 0-31 | 0.00-6.50  | 0-0 | 0.00-0.00 |

Gifu

|                        |     |      |            |      |           |
|------------------------|-----|------|------------|------|-----------|
| Apr 5 to Apr 11, 2021  | 406 | 0-0  | 0.00-0.00  | 0-22 | 0.00-5.14 |
| Apr 12 to Apr 18, 2021 | 456 | 0-33 | 0.00-7.80  | 0-0  | 0.00-0.00 |
| Apr 19 to Apr 25, 2021 | 436 | 0-22 | 0.00-5.31  | 0-0  | 0.00-0.00 |
| Apr 26 to May 2, 2021  | 450 | 2-50 | 0.50-12.50 | 0-0  | 0.00-0.00 |
| May 3 to May 9, 2021   | 440 | 0-44 | 0.00-11.11 | 0-0  | 0.00-0.00 |
| May 10 to May 16, 2021 | 397 | 0-14 | 0.00-3.66  | 0-0  | 0.00-0.00 |
| May 17 to May 23, 2021 | 395 | 0-21 | 0.00-5.61  | 0-0  | 0.00-0.00 |
| May 24 to May 30, 2021 | 416 | 0-44 | 0.00-11.83 | 0-0  | 0.00-0.00 |

Shizuoka

|                        |     |      |            |      |           |
|------------------------|-----|------|------------|------|-----------|
| Apr 5 to Apr 11, 2021  | 350 | 0-6  | 0.00-1.74  | 0-0  | 0.00-0.00 |
| Apr 12 to Apr 18, 2021 | 372 | 0-32 | 0.00-9.41  | 0-0  | 0.00-0.00 |
| Apr 19 to Apr 25, 2021 | 372 | 0-38 | 0.00-11.38 | 0-0  | 0.00-0.00 |
| Apr 26 to May 2, 2021  | 368 | 0-39 | 0.00-11.85 | 0-0  | 0.00-0.00 |
| May 3 to May 9, 2021   | 355 | 0-30 | 0.00-9.23  | 0-0  | 0.00-0.00 |
| May 10 to May 16, 2021 | 365 | 5-46 | 1.57-14.42 | 0-0  | 0.00-0.00 |
| May 17 to May 23, 2021 | 303 | 0-0  | 0.00-0.00  | 0-10 | 0.00-3.19 |
| May 24 to May 30, 2021 | 333 | 0-24 | 0.00-7.77  | 0-0  | 0.00-0.00 |

Aichi

|                        |      |        |            |     |           |
|------------------------|------|--------|------------|-----|-----------|
| Apr 5 to Apr 11, 2021  | 1257 | 0-8    | 0.00-0.64  | 0-0 | 0.00-0.00 |
| Apr 12 to Apr 18, 2021 | 1256 | 0-24   | 0.00-1.95  | 0-0 | 0.00-0.00 |
| Apr 19 to Apr 25, 2021 | 1274 | 0-46   | 0.00-3.75  | 0-0 | 0.00-0.00 |
| Apr 26 to May 2, 2021  | 1310 | 5-98   | 0.41-8.09  | 0-0 | 0.00-0.00 |
| May 3 to May 9, 2021   | 1300 | 3-95   | 0.25-7.88  | 0-0 | 0.00-0.00 |
| May 10 to May 16, 2021 | 1279 | 0-81   | 0.00-6.76  | 0-0 | 0.00-0.00 |
| May 17 to May 23, 2021 | 1322 | 32-126 | 2.68-10.54 | 0-0 | 0.00-0.00 |
| May 24 to May 30, 2021 | 1268 | 0-82   | 0.00-6.91  | 0-0 | 0.00-0.00 |

Mie

|                        |      |        |            |      |           |
|------------------------|------|--------|------------|------|-----------|
| Apr 5 to Apr 11, 2021  | 1278 | 0-0    | 0.00-0.00  | 0-97 | 0.00-7.05 |
| Apr 12 to Apr 18, 2021 | 1368 | 0-11   | 0.00-0.81  | 0-0  | 0.00-0.00 |
| Apr 19 to Apr 25, 2021 | 1389 | 0-50   | 0.00-3.73  | 0-0  | 0.00-0.00 |
| Apr 26 to May 2, 2021  | 1405 | 0-83   | 0.00-6.28  | 0-0  | 0.00-0.00 |
| May 3 to May 9, 2021   | 1344 | 0-41   | 0.00-3.15  | 0-0  | 0.00-0.00 |
| May 10 to May 16, 2021 | 1422 | 40-152 | 3.15-11.97 | 0-0  | 0.00-0.00 |
| May 17 to May 23, 2021 | 1206 | 0-0    | 0.00-0.00  | 0-45 | 0.00-3.60 |
| May 24 to May 30, 2021 | 1274 | 0-39   | 0.00-3.16  | 0-0  | 0.00-0.00 |

Shiga

|          |                        |      |        |             |      |           |
|----------|------------------------|------|--------|-------------|------|-----------|
|          | Apr 5 to Apr 11, 2021  | 206  | 0-15   | 0.00-7.85   | 0-0  | 0.00-0.00 |
|          | Apr 12 to Apr 18, 2021 | 188  | 0-0    | 0.00-0.00   | 0-1  | 0.00-0.53 |
|          | Apr 19 to Apr 25, 2021 | 242  | 28-58  | 15.22-31.52 | 0-0  | 0.00-0.00 |
|          | Apr 26 to May 2, 2021  | 190  | 0-11   | 0.00-6.15   | 0-0  | 0.00-0.00 |
|          | May 3 to May 9, 2021   | 209  | 3-32   | 1.69-18.08  | 0-0  | 0.00-0.00 |
|          | May 10 to May 16, 2021 | 215  | 8-37   | 4.49-20.79  | 0-0  | 0.00-0.00 |
|          | May 17 to May 23, 2021 | 173  | 0-1    | 0.00-0.58   | 0-0  | 0.00-0.00 |
|          | May 24 to May 30, 2021 | 176  | 0-6    | 0.00-3.53   | 0-0  | 0.00-0.00 |
| Kyoto    |                        |      |        |             |      |           |
|          | Apr 5 to Apr 11, 2021  | 860  | 0-37   | 0.00-4.50   | 0-0  | 0.00-0.00 |
|          | Apr 12 to Apr 18, 2021 | 815  | 0-6    | 0.00-0.74   | 0-0  | 0.00-0.00 |
|          | Apr 19 to Apr 25, 2021 | 815  | 0-19   | 0.00-2.39   | 0-0  | 0.00-0.00 |
|          | Apr 26 to May 2, 2021  | 858  | 0-76   | 0.00-9.72   | 0-0  | 0.00-0.00 |
|          | May 3 to May 9, 2021   | 813  | 0-45   | 0.00-5.86   | 0-0  | 0.00-0.00 |
|          | May 10 to May 16, 2021 | 798  | 0-41   | 0.00-5.42   | 0-0  | 0.00-0.00 |
|          | May 17 to May 23, 2021 | 815  | 0-74   | 0.00-9.99   | 0-0  | 0.00-0.00 |
|          | May 24 to May 30, 2021 | 734  | 0-0    | 0.00-0.00   | 0-4  | 0.00-0.54 |
| Osaka    |                        |      |        |             |      |           |
|          | Apr 5 to Apr 11, 2021  | 421  | 0-2    | 0.00-0.48   | 0-0  | 0.00-0.00 |
|          | Apr 12 to Apr 18, 2021 | 421  | 0-10   | 0.00-2.43   | 0-0  | 0.00-0.00 |
|          | Apr 19 to Apr 25, 2021 | 441  | 0-33   | 0.00-8.09   | 0-0  | 0.00-0.00 |
|          | Apr 26 to May 2, 2021  | 426  | 0-22   | 0.00-5.45   | 0-0  | 0.00-0.00 |
|          | May 3 to May 9, 2021   | 409  | 0-10   | 0.00-2.51   | 0-0  | 0.00-0.00 |
|          | May 10 to May 16, 2021 | 454  | 11-58  | 2.78-14.65  | 0-0  | 0.00-0.00 |
|          | May 17 to May 23, 2021 | 390  | 0-0    | 0.00-0.00   | 0-0  | 0.00-0.00 |
|          | May 24 to May 30, 2021 | 412  | 0-29   | 0.00-7.57   | 0-0  | 0.00-0.00 |
| Hyogo    |                        |      |        |             |      |           |
|          | Apr 5 to Apr 11, 2021  | 2288 | 0-0    | 0.00-0.00   | 0-41 | 0.00-1.76 |
|          | Apr 12 to Apr 18, 2021 | 2463 | 1-166  | 0.04-7.23   | 0-0  | 0.00-0.00 |
|          | Apr 19 to Apr 25, 2021 | 2504 | 85-244 | 3.76-10.80  | 0-0  | 0.00-0.00 |
|          | Apr 26 to May 2, 2021  | 2459 | 88-246 | 3.98-11.12  | 0-0  | 0.00-0.00 |
|          | May 3 to May 9, 2021   | 2360 | 10-173 | 0.46-7.91   | 0-0  | 0.00-0.00 |
|          | May 10 to May 16, 2021 | 2227 | 0-58   | 0.00-2.67   | 0-0  | 0.00-0.00 |
|          | May 17 to May 23, 2021 | 2178 | 0-30   | 0.00-1.40   | 0-0  | 0.00-0.00 |
|          | May 24 to May 30, 2021 | 2162 | 0-37   | 0.00-1.74   | 0-0  | 0.00-0.00 |
| Nara     |                        |      |        |             |      |           |
|          | Apr 5 to Apr 11, 2021  | 1145 | 0-11   | 0.00-0.97   | 0-0  | 0.00-0.00 |
|          | Apr 12 to Apr 18, 2021 | 1173 | 0-52   | 0.00-4.64   | 0-0  | 0.00-0.00 |
|          | Apr 19 to Apr 25, 2021 | 1185 | 0-86   | 0.00-7.83   | 0-0  | 0.00-0.00 |
|          | Apr 26 to May 2, 2021  | 1226 | 52-150 | 4.83-13.94  | 0-0  | 0.00-0.00 |
|          | May 3 to May 9, 2021   | 1186 | 26-123 | 2.45-11.57  | 0-0  | 0.00-0.00 |
|          | May 10 to May 16, 2021 | 1157 | 12-104 | 1.14-9.88   | 0-0  | 0.00-0.00 |
|          | May 17 to May 23, 2021 | 1144 | 5-100  | 0.48-9.58   | 0-0  | 0.00-0.00 |
|          | May 24 to May 30, 2021 | 1095 | 0-66   | 0.00-6.41   | 0-0  | 0.00-0.00 |
| Wakayama |                        |      |        |             |      |           |
|          | Apr 5 to Apr 11, 2021  | 257  | 0-0    | 0.00-0.00   | 0-18 | 0.00-6.55 |

|           |                        |      |        |             |      |           |
|-----------|------------------------|------|--------|-------------|------|-----------|
|           | Apr 12 to Apr 18, 2021 | 309  | 1-37   | 0.37-13.60  | 0-0  | 0.00-0.00 |
|           | Apr 19 to Apr 25, 2021 | 326  | 24-58  | 8.96-21.64  | 0-0  | 0.00-0.00 |
|           | Apr 26 to May 2, 2021  | 279  | 0-12   | 0.00-4.49   | 0-0  | 0.00-0.00 |
|           | May 3 to May 9, 2021   | 272  | 0-11   | 0.00-4.21   | 0-0  | 0.00-0.00 |
|           | May 10 to May 16, 2021 | 309  | 15-49  | 5.77-18.85  | 0-0  | 0.00-0.00 |
|           | May 17 to May 23, 2021 | 245  | 0-0    | 0.00-0.00   | 0-13 | 0.00-5.04 |
|           | May 24 to May 30, 2021 | 252  | 0-0    | 0.00-0.00   | 0-0  | 0.00-0.00 |
| Tottori   |                        |      |        |             |      |           |
|           | Apr 5 to Apr 11, 2021  | 350  | 0-7    | 0.00-2.04   | 0-0  | 0.00-0.00 |
|           | Apr 12 to Apr 18, 2021 | 331  | 0-0    | 0.00-0.00   | 0-9  | 0.00-2.65 |
|           | Apr 19 to Apr 25, 2021 | 369  | 0-34   | 0.00-10.15  | 0-0  | 0.00-0.00 |
|           | Apr 26 to May 2, 2021  | 328  | 0-2    | 0.00-0.61   | 0-0  | 0.00-0.00 |
|           | May 3 to May 9, 2021   | 373  | 12-50  | 3.72-15.48  | 0-0  | 0.00-0.00 |
|           | May 10 to May 16, 2021 | 361  | 4-42   | 1.25-13.17  | 0-0  | 0.00-0.00 |
|           | May 17 to May 23, 2021 | 299  | 0-0    | 0.00-0.00   | 0-14 | 0.00-4.47 |
|           | May 24 to May 30, 2021 | 378  | 33-73  | 10.82-23.93 | 0-0  | 0.00-0.00 |
| Shimane   |                        |      |        |             |      |           |
|           | Apr 5 to Apr 11, 2021  | 233  | 0-0    | 0.00-0.00   | 0-8  | 0.00-3.32 |
|           | Apr 12 to Apr 18, 2021 | 256  | 0-18   | 0.00-7.56   | 0-0  | 0.00-0.00 |
|           | Apr 19 to Apr 25, 2021 | 227  | 0-0    | 0.00-0.00   | 0-7  | 0.00-2.99 |
|           | Apr 26 to May 2, 2021  | 254  | 0-25   | 0.00-10.92  | 0-0  | 0.00-0.00 |
|           | May 3 to May 9, 2021   | 232  | 0-7    | 0.00-3.11   | 0-0  | 0.00-0.00 |
|           | May 10 to May 16, 2021 | 223  | 0-5    | 0.00-2.29   | 0-0  | 0.00-0.00 |
|           | May 17 to May 23, 2021 | 221  | 0-5    | 0.00-2.31   | 0-0  | 0.00-0.00 |
|           | May 24 to May 30, 2021 | 223  | 0-15   | 0.00-7.21   | 0-0  | 0.00-0.00 |
| Okayama   |                        |      |        |             |      |           |
|           | Apr 5 to Apr 11, 2021  | 144  | 0-4    | 0.00-2.86   | 0-0  | 0.00-0.00 |
|           | Apr 12 to Apr 18, 2021 | 158  | 0-20   | 0.00-14.49  | 0-0  | 0.00-0.00 |
|           | Apr 19 to Apr 25, 2021 | 147  | 0-12   | 0.00-8.89   | 0-0  | 0.00-0.00 |
|           | Apr 26 to May 2, 2021  | 132  | 0-0    | 0.00-0.00   | 0-0  | 0.00-0.00 |
|           | May 3 to May 9, 2021   | 156  | 1-24   | 0.76-18.18  | 0-0  | 0.00-0.00 |
|           | May 10 to May 16, 2021 | 162  | 9-32   | 6.92-24.62  | 0-0  | 0.00-0.00 |
|           | May 17 to May 23, 2021 | 137  | 0-9    | 0.00-7.03   | 0-0  | 0.00-0.00 |
|           | May 24 to May 30, 2021 | 137  | 0-12   | 0.00-9.60   | 0-0  | 0.00-0.00 |
| Hiroshima |                        |      |        |             |      |           |
|           | Apr 5 to Apr 11, 2021  | 1358 | 0-0    | 0.00-0.00   | 0-10 | 0.00-0.73 |
|           | Apr 12 to Apr 18, 2021 | 1408 | 0-60   | 0.00-4.45   | 0-0  | 0.00-0.00 |
|           | Apr 19 to Apr 25, 2021 | 1401 | 0-73   | 0.00-5.50   | 0-0  | 0.00-0.00 |
|           | Apr 26 to May 2, 2021  | 1508 | 84-198 | 6.41-15.11  | 0-0  | 0.00-0.00 |
|           | May 3 to May 9, 2021   | 1435 | 39-146 | 3.03-11.33  | 0-0  | 0.00-0.00 |
|           | May 10 to May 16, 2021 | 1371 | 0-104  | 0.00-8.21   | 0-0  | 0.00-0.00 |
|           | May 17 to May 23, 2021 | 1319 | 0-71   | 0.00-5.69   | 0-0  | 0.00-0.00 |
|           | May 24 to May 30, 2021 | 1293 | 0-57   | 0.00-4.61   | 0-0  | 0.00-0.00 |
| Yamaguchi |                        |      |        |             |      |           |
|           | Apr 5 to Apr 11, 2021  | 443  | 0-41   | 0.00-10.20  | 0-0  | 0.00-0.00 |
|           | Apr 12 to Apr 18, 2021 | 393  | 0-0    | 0.00-0.00   | 0-3  | 0.00-0.76 |

|           |                        |      |        |            |      |           |
|-----------|------------------------|------|--------|------------|------|-----------|
|           | Apr 19 to Apr 25, 2021 | 444  | 8-55   | 2.06-14.14 | 0-0  | 0.00-0.00 |
|           | Apr 26 to May 2, 2021  | 384  | 0-1    | 0.00-0.26  | 0-0  | 0.00-0.00 |
|           | May 3 to May 9, 2021   | 401  | 0-20   | 0.00-5.25  | 0-0  | 0.00-0.00 |
|           | May 10 to May 16, 2021 | 377  | 0-0    | 0.00-0.00  | 0-0  | 0.00-0.00 |
|           | May 17 to May 23, 2021 | 393  | 0-19   | 0.00-5.08  | 0-0  | 0.00-0.00 |
|           | May 24 to May 30, 2021 | 400  | 0-32   | 0.00-8.70  | 0-0  | 0.00-0.00 |
| Tokushima |                        |      |        |            |      |           |
|           | Apr 5 to Apr 11, 2021  | 1001 | 0-0    | 0.00-0.00  | 0-44 | 0.00-4.21 |
|           | Apr 12 to Apr 18, 2021 | 1058 | 0-25   | 0.00-2.42  | 0-0  | 0.00-0.00 |
|           | Apr 19 to Apr 25, 2021 | 1161 | 54-142 | 5.30-13.94 | 0-0  | 0.00-0.00 |
|           | Apr 26 to May 2, 2021  | 1087 | 0-82   | 0.00-8.16  | 0-0  | 0.00-0.00 |
|           | May 3 to May 9, 2021   | 1068 | 3-82   | 0.30-8.32  | 0-0  | 0.00-0.00 |
|           | May 10 to May 16, 2021 | 1082 | 19-105 | 1.94-10.75 | 0-0  | 0.00-0.00 |
|           | May 17 to May 23, 2021 | 991  | 0-30   | 0.00-3.12  | 0-0  | 0.00-0.00 |
|           | May 24 to May 30, 2021 | 1010 | 0-58   | 0.00-6.09  | 0-0  | 0.00-0.00 |
| Kagawa    |                        |      |        |            |      |           |
|           | Apr 5 to Apr 11, 2021  | 268  | 0-22   | 0.00-8.94  | 0-0  | 0.00-0.00 |
|           | Apr 12 to Apr 18, 2021 | 285  | 9-40   | 3.67-16.33 | 0-0  | 0.00-0.00 |
|           | Apr 19 to Apr 25, 2021 | 257  | 0-14   | 0.00-5.76  | 0-0  | 0.00-0.00 |
|           | Apr 26 to May 2, 2021  | 254  | 0-16   | 0.00-6.72  | 0-0  | 0.00-0.00 |
|           | May 3 to May 9, 2021   | 280  | 13-45  | 5.53-19.15 | 0-0  | 0.00-0.00 |
|           | May 10 to May 16, 2021 | 261  | 0-28   | 0.00-12.02 | 0-0  | 0.00-0.00 |
|           | May 17 to May 23, 2021 | 242  | 0-13   | 0.00-5.68  | 0-0  | 0.00-0.00 |
|           | May 24 to May 30, 2021 | 220  | 0-0    | 0.00-0.00  | 0-7  | 0.00-3.08 |
| Ehime     |                        |      |        |            |      |           |
|           | Apr 5 to Apr 11, 2021  | 309  | 0-6    | 0.00-1.98  | 0-0  | 0.00-0.00 |
|           | Apr 12 to Apr 18, 2021 | 325  | 0-21   | 0.00-6.91  | 0-0  | 0.00-0.00 |
|           | Apr 19 to Apr 25, 2021 | 288  | 0-0    | 0.00-0.00  | 0-14 | 0.00-4.64 |
|           | Apr 26 to May 2, 2021  | 335  | 5-41   | 1.70-13.95 | 0-0  | 0.00-0.00 |
|           | May 3 to May 9, 2021   | 338  | 14-49  | 4.84-16.96 | 0-0  | 0.00-0.00 |
|           | May 10 to May 16, 2021 | 286  | 0-2    | 0.00-0.70  | 0-0  | 0.00-0.00 |
|           | May 17 to May 23, 2021 | 306  | 0-26   | 0.00-9.29  | 0-0  | 0.00-0.00 |
|           | May 24 to May 30, 2021 | 272  | 0-0    | 0.00-0.00  | 0-4  | 0.00-1.45 |
| Kochi     |                        |      |        |            |      |           |
|           | Apr 5 to Apr 11, 2021  | 495  | 0-0    | 0.00-0.00  | 0-5  | 0.00-1.00 |
|           | Apr 12 to Apr 18, 2021 | 508  | 0-15   | 0.00-3.04  | 0-0  | 0.00-0.00 |
|           | Apr 19 to Apr 25, 2021 | 490  | 0-3    | 0.00-0.62  | 0-0  | 0.00-0.00 |
|           | Apr 26 to May 2, 2021  | 525  | 0-44   | 0.00-9.15  | 0-0  | 0.00-0.00 |
|           | May 3 to May 9, 2021   | 459  | 0-0    | 0.00-0.00  | 0-10 | 0.00-2.13 |
|           | May 10 to May 16, 2021 | 497  | 0-32   | 0.00-6.88  | 0-0  | 0.00-0.00 |
|           | May 17 to May 23, 2021 | 475  | 0-16   | 0.00-3.49  | 0-0  | 0.00-0.00 |
|           | May 24 to May 30, 2021 | 415  | 0-0    | 0.00-0.00  | 0-35 | 0.00-7.78 |
| Fukuoka   |                        |      |        |            |      |           |
|           | Apr 5 to Apr 11, 2021  | 463  | 0-0    | 0.00-0.00  | 0-9  | 0.00-1.91 |
|           | Apr 12 to Apr 18, 2021 | 492  | 0-24   | 0.00-5.13  | 0-0  | 0.00-0.00 |
|           | Apr 19 to Apr 25, 2021 | 468  | 0-8    | 0.00-1.74  | 0-0  | 0.00-0.00 |

|          |                        |      |        |            |      |           |
|----------|------------------------|------|--------|------------|------|-----------|
|          | Apr 26 to May 2, 2021  | 491  | 0-40   | 0.00-8.87  | 0-0  | 0.00-0.00 |
|          | May 3 to May 9, 2021   | 478  | 0-33   | 0.00-7.42  | 0-0  | 0.00-0.00 |
|          | May 10 to May 16, 2021 | 472  | 0-32   | 0.00-7.27  | 0-0  | 0.00-0.00 |
|          | May 17 to May 23, 2021 | 451  | 0-17   | 0.00-3.92  | 0-0  | 0.00-0.00 |
|          | May 24 to May 30, 2021 | 431  | 0-0    | 0.00-0.00  | 0-0  | 0.00-0.00 |
| Saga     |                        |      |        |            |      |           |
|          | Apr 5 to Apr 11, 2021  | 617  | 0-26   | 0.00-4.40  | 0-0  | 0.00-0.00 |
|          | Apr 12 to Apr 18, 2021 | 599  | 0-15   | 0.00-2.57  | 0-0  | 0.00-0.00 |
|          | Apr 19 to Apr 25, 2021 | 635  | 0-63   | 0.00-11.01 | 0-0  | 0.00-0.00 |
|          | Apr 26 to May 2, 2021  | 614  | 0-49   | 0.00-8.67  | 0-0  | 0.00-0.00 |
|          | May 3 to May 9, 2021   | 636  | 20-82  | 3.61-14.80 | 0-0  | 0.00-0.00 |
|          | May 10 to May 16, 2021 | 611  | 1-62   | 0.18-11.29 | 0-0  | 0.00-0.00 |
|          | May 17 to May 23, 2021 | 584  | 0-46   | 0.00-8.55  | 0-0  | 0.00-0.00 |
|          | May 24 to May 30, 2021 | 541  | 0-12   | 0.00-2.27  | 0-0  | 0.00-0.00 |
| Nagasaki |                        |      |        |            |      |           |
|          | Apr 5 to Apr 11, 2021  | 1830 | 0-35   | 0.00-1.95  | 0-0  | 0.00-0.00 |
|          | Apr 12 to Apr 18, 2021 | 1792 | 0-13   | 0.00-0.73  | 0-0  | 0.00-0.00 |
|          | Apr 19 to Apr 25, 2021 | 1946 | 55-194 | 3.14-11.07 | 0-0  | 0.00-0.00 |
|          | Apr 26 to May 2, 2021  | 1853 | 0-131  | 0.00-7.61  | 0-0  | 0.00-0.00 |
|          | May 3 to May 9, 2021   | 1910 | 80-208 | 4.70-12.22 | 0-0  | 0.00-0.00 |
|          | May 10 to May 16, 2021 | 1838 | 23-155 | 1.37-9.21  | 0-0  | 0.00-0.00 |
|          | May 17 to May 23, 2021 | 1735 | 0-63   | 0.00-3.77  | 0-0  | 0.00-0.00 |
|          | May 24 to May 30, 2021 | 1707 | 0-58   | 0.00-3.52  | 0-0  | 0.00-0.00 |
| Kumamoto |                        |      |        |            |      |           |
|          | Apr 5 to Apr 11, 2021  | 438  | 0-0    | 0.00-0.00  | 0-12 | 0.00-2.67 |
|          | Apr 12 to Apr 18, 2021 | 449  | 0-14   | 0.00-3.22  | 0-0  | 0.00-0.00 |
|          | Apr 19 to Apr 25, 2021 | 466  | 0-37   | 0.00-8.62  | 0-0  | 0.00-0.00 |
|          | Apr 26 to May 2, 2021  | 435  | 0-17   | 0.00-4.07  | 0-0  | 0.00-0.00 |
|          | May 3 to May 9, 2021   | 451  | 0-41   | 0.00-10.00 | 0-0  | 0.00-0.00 |
|          | May 10 to May 16, 2021 | 457  | 2-51   | 0.49-12.56 | 0-0  | 0.00-0.00 |
|          | May 17 to May 23, 2021 | 465  | 15-65  | 3.75-16.25 | 0-0  | 0.00-0.00 |
|          | May 24 to May 30, 2021 | 384  | 0-0    | 0.00-0.00  | 0-13 | 0.00-3.27 |
| Oita     |                        |      |        |            |      |           |
|          | Apr 5 to Apr 11, 2021  | 241  | 0-0    | 0.00-0.00  | 0-4  | 0.00-1.63 |
|          | Apr 12 to Apr 18, 2021 | 254  | 0-11   | 0.00-4.53  | 0-0  | 0.00-0.00 |
|          | Apr 19 to Apr 25, 2021 | 263  | 0-25   | 0.00-10.50 | 0-0  | 0.00-0.00 |
|          | Apr 26 to May 2, 2021  | 239  | 0-4    | 0.00-1.70  | 0-0  | 0.00-0.00 |
|          | May 3 to May 9, 2021   | 250  | 0-22   | 0.00-9.65  | 0-0  | 0.00-0.00 |
|          | May 10 to May 16, 2021 | 230  | 0-9    | 0.00-4.07  | 0-0  | 0.00-0.00 |
|          | May 17 to May 23, 2021 | 210  | 0-0    | 0.00-0.00  | 0-8  | 0.00-3.67 |
|          | May 24 to May 30, 2021 | 219  | 0-3    | 0.00-1.39  | 0-0  | 0.00-0.00 |
| Miyazaki |                        |      |        |            |      |           |
|          | Apr 5 to Apr 11, 2021  | 289  | 0-34   | 0.00-13.33 | 0-0  | 0.00-0.00 |
|          | Apr 12 to Apr 18, 2021 | 285  | 0-32   | 0.00-12.65 | 0-0  | 0.00-0.00 |
|          | Apr 19 to Apr 25, 2021 | 250  | 0-2    | 0.00-0.81  | 0-0  | 0.00-0.00 |
|          | Apr 26 to May 2, 2021  | 286  | 7-42   | 2.87-17.21 | 0-0  | 0.00-0.00 |

|           |                        |     |       |             |      |            |
|-----------|------------------------|-----|-------|-------------|------|------------|
|           | May 3 to May 9, 2021   | 273 | 0-33  | 0.00-13.75  | 0-0  | 0.00-0.00  |
|           | May 10 to May 16, 2021 | 256 | 0-23  | 0.00-9.87   | 0-0  | 0.00-0.00  |
|           | May 17 to May 23, 2021 | 252 | 0-22  | 0.00-9.57   | 0-0  | 0.00-0.00  |
|           | May 24 to May 30, 2021 | 261 | 0-34  | 0.00-14.98  | 0-0  | 0.00-0.00  |
| Kagoshima |                        |     |       |             |      |            |
|           | Apr 5 to Apr 11, 2021  | 193 | 0-14  | 0.00-7.82   | 0-0  | 0.00-0.00  |
|           | Apr 12 to Apr 18, 2021 | 194 | 0-15  | 0.00-8.38   | 0-0  | 0.00-0.00  |
|           | Apr 19 to Apr 25, 2021 | 189 | 0-12  | 0.00-6.78   | 0-0  | 0.00-0.00  |
|           | Apr 26 to May 2, 2021  | 204 | 3-33  | 1.75-19.30  | 0-0  | 0.00-0.00  |
|           | May 3 to May 9, 2021   | 217 | 21-50 | 12.57-29.94 | 0-0  | 0.00-0.00  |
|           | May 10 to May 16, 2021 | 181 | 0-16  | 0.00-9.70   | 0-0  | 0.00-0.00  |
|           | May 17 to May 23, 2021 | 193 | 0-29  | 0.00-17.68  | 0-0  | 0.00-0.00  |
|           | May 24 to May 30, 2021 | 172 | 0-11  | 0.00-6.83   | 0-0  | 0.00-0.00  |
| Okinawa   |                        |     |       |             |      |            |
|           | Apr 5 to Apr 11, 2021  | 160 | 0-0   | 0.00-0.00   | 3-30 | 1.58-15.79 |
|           | Apr 12 to Apr 18, 2021 | 220 | 5-34  | 2.69-18.28  | 0-0  | 0.00-0.00  |
|           | Apr 19 to Apr 25, 2021 | 189 | 0-4   | 0.00-2.16   | 0-0  | 0.00-0.00  |
|           | Apr 26 to May 2, 2021  | 194 | 0-14  | 0.00-7.78   | 0-0  | 0.00-0.00  |
|           | May 3 to May 9, 2021   | 202 | 0-27  | 0.00-15.43  | 0-0  | 0.00-0.00  |
|           | May 10 to May 16, 2021 | 183 | 0-12  | 0.00-7.02   | 0-0  | 0.00-0.00  |
|           | May 17 to May 23, 2021 | 186 | 0-19  | 0.00-11.38  | 0-0  | 0.00-0.00  |
|           | May 24 to May 30, 2021 | 178 | 0-13  | 0.00-7.88   | 0-0  | 0.00-0.00  |

---



**Table A.19: Weekly number of observed and excess/exiguous deaths in Japan and 47 prefectures for senility-related deaths in nursing homes and elderly care facilities from January 2020 through May 2021.**

| Prefecture | Week                   | Observed | Excess deaths | Percent excess | Exiguous deaths | Percent exiguous |
|------------|------------------------|----------|---------------|----------------|-----------------|------------------|
| Japan      |                        |          |               |                |                 |                  |
|            | Apr 5 to Apr 11, 2021  | 1296     | 0–6           | 0.00–0.47      | 0–0             | 0.00–0.00        |
|            | Apr 12 to Apr 18, 2021 | 1438     | 68–160        | 5.32–12.52     | 0–0             | 0.00–0.00        |
|            | Apr 19 to Apr 25, 2021 | 1327     | 0–67          | 0.00–5.32      | 0–0             | 0.00–0.00        |
|            | Apr 26 to May 2, 2021  | 1489     | 142–240       | 11.37–19.22    | 0–0             | 0.00–0.00        |
|            | May 3 to May 9, 2021   | 1444     | 112–202       | 9.02–16.26     | 0–0             | 0.00–0.00        |
|            | May 10 to May 16, 2021 | 1400     | 84–169        | 6.82–13.73     | 0–0             | 0.00–0.00        |
|            | May 17 to May 23, 2021 | 1317     | 2–91          | 0.16–7.42      | 0–0             | 0.00–0.00        |
|            | May 24 to May 30, 2021 | 1317     | 0–95          | 0.00–7.77      | 0–0             | 0.00–0.00        |
| Hokkaido   |                        |          |               |                |                 |                  |
|            | Apr 5 to Apr 11, 2021  | 35       | 0–5           | 0.00–16.67     | 0–0             | 0.00–0.00        |
|            | Apr 12 to Apr 18, 2021 | 44       | 2–14          | 6.67–46.67     | 0–0             | 0.00–0.00        |
|            | Apr 19 to Apr 25, 2021 | 33       | 0–3           | 0.00–10.00     | 0–0             | 0.00–0.00        |
|            | Apr 26 to May 2, 2021  | 44       | 2–14          | 6.67–46.67     | 0–0             | 0.00–0.00        |
|            | May 3 to May 9, 2021   | 41       | 0–11          | 0.00–36.67     | 0–0             | 0.00–0.00        |
|            | May 10 to May 16, 2021 | 28       | 0–0           | 0.00–0.00      | 0–2             | 0.00–6.67        |
|            | May 17 to May 23, 2021 | 31       | 0–1           | 0.00–3.33      | 0–0             | 0.00–0.00        |
|            | May 24 to May 30, 2021 | 43       | 0–13          | 0.00–43.33     | 0–0             | 0.00–0.00        |
| Aomori     |                        |          |               |                |                 |                  |
|            | Apr 5 to Apr 11, 2021  | 15       | 0–0           | 0.00–0.00      | 0–3             | 0.00–16.67       |
|            | Apr 12 to Apr 18, 2021 | 17       | 0–0           | 0.00–0.00      | 0–1             | 0.00–5.56        |
|            | Apr 19 to Apr 25, 2021 | 17       | 0–0           | 0.00–0.00      | 0–1             | 0.00–5.56        |
|            | Apr 26 to May 2, 2021  | 20       | 0–3           | 0.00–17.65     | 0–0             | 0.00–0.00        |
|            | May 3 to May 9, 2021   | 19       | 0–2           | 0.00–11.76     | 0–0             | 0.00–0.00        |
|            | May 10 to May 16, 2021 | 19       | 0–2           | 0.00–11.76     | 0–0             | 0.00–0.00        |
|            | May 17 to May 23, 2021 | 15       | 0–0           | 0.00–0.00      | 0–1             | 0.00–6.25        |
|            | May 24 to May 30, 2021 | 19       | 0–3           | 0.00–18.75     | 0–0             | 0.00–0.00        |
| Iwate      |                        |          |               |                |                 |                  |
|            | Apr 5 to Apr 11, 2021  | 17       | 0–1           | 0.00–6.25      | 0–0             | 0.00–0.00        |
|            | Apr 12 to Apr 18, 2021 | 15       | 0–0           | 0.00–0.00      | 0–1             | 0.00–6.25        |
|            | Apr 19 to Apr 25, 2021 | 11       | 0–0           | 0.00–0.00      | 0–5             | 0.00–31.25       |
|            | Apr 26 to May 2, 2021  | 12       | 0–0           | 0.00–0.00      | 0–4             | 0.00–25.00       |
|            | May 3 to May 9, 2021   | 18       | 0–2           | 0.00–12.50     | 0–0             | 0.00–0.00        |
|            | May 10 to May 16, 2021 | 14       | 0–0           | 0.00–0.00      | 0–2             | 0.00–12.50       |
|            | May 17 to May 23, 2021 | 12       | 0–0           | 0.00–0.00      | 0–4             | 0.00–25.00       |
|            | May 24 to May 30, 2021 | 12       | 0–0           | 0.00–0.00      | 0–4             | 0.00–25.00       |
| Miyagi     |                        |          |               |                |                 |                  |
|            | Apr 5 to Apr 11, 2021  | 29       | 0–7           | 0.00–31.82     | 0–0             | 0.00–0.00        |
|            | Apr 12 to Apr 18, 2021 | 34       | 1–11          | 4.35–47.83     | 0–0             | 0.00–0.00        |
|            | Apr 19 to Apr 25, 2021 | 26       | 0–3           | 0.00–13.04     | 0–0             | 0.00–0.00        |
|            | Apr 26 to May 2, 2021  | 28       | 0–4           | 0.00–16.67     | 0–0             | 0.00–0.00        |
|            | May 3 to May 9, 2021   | 24       | 0–0           | 0.00–0.00      | 0–0             | 0.00–0.00        |

|           |                        |    |      |             |      |             |
|-----------|------------------------|----|------|-------------|------|-------------|
|           | May 10 to May 16, 2021 | 31 | 0-7  | 0.00-29.17  | 0-0  | 0.00-0.00   |
|           | May 17 to May 23, 2021 | 20 | 0-0  | 0.00-0.00   | 0-3  | 0.00-13.04  |
|           | May 24 to May 30, 2021 | 20 | 0-0  | 0.00-0.00   | 0-4  | 0.00-16.67  |
| Akita     |                        |    |      |             |      |             |
|           | Apr 5 to Apr 11, 2021  | 10 | 0-0  | 0.00-0.00   | 0-2  | 0.00-16.67  |
|           | Apr 12 to Apr 18, 2021 | 17 | 0-5  | 0.00-41.67  | 0-0  | 0.00-0.00   |
|           | Apr 19 to Apr 25, 2021 | 9  | 0-0  | 0.00-0.00   | 0-3  | 0.00-25.00  |
|           | Apr 26 to May 2, 2021  | 12 | 0-0  | 0.00-0.00   | 0-0  | 0.00-0.00   |
|           | May 3 to May 9, 2021   | 20 | 2-9  | 18.18-81.82 | 0-0  | 0.00-0.00   |
|           | May 10 to May 16, 2021 | 13 | 0-3  | 0.00-30.00  | 0-0  | 0.00-0.00   |
|           | May 17 to May 23, 2021 | 6  | 0-0  | 0.00-0.00   | 0-5  | 0.00-45.45  |
|           | May 24 to May 30, 2021 | 12 | 0-1  | 0.00-9.09   | 0-0  | 0.00-0.00   |
| Yamagata  |                        |    |      |             |      |             |
|           | Apr 5 to Apr 11, 2021  | 10 | 0-0  | 0.00-0.00   | 4-12 | 18.18-54.55 |
|           | Apr 12 to Apr 18, 2021 | 24 | 0-3  | 0.00-14.29  | 0-0  | 0.00-0.00   |
|           | Apr 19 to Apr 25, 2021 | 18 | 0-0  | 0.00-0.00   | 0-2  | 0.00-10.00  |
|           | Apr 26 to May 2, 2021  | 27 | 0-7  | 0.00-35.00  | 0-0  | 0.00-0.00   |
|           | May 3 to May 9, 2021   | 28 | 0-8  | 0.00-40.00  | 0-0  | 0.00-0.00   |
|           | May 10 to May 16, 2021 | 23 | 0-3  | 0.00-15.00  | 0-0  | 0.00-0.00   |
|           | May 17 to May 23, 2021 | 27 | 0-7  | 0.00-35.00  | 0-0  | 0.00-0.00   |
|           | May 24 to May 30, 2021 | 33 | 4-14 | 21.05-73.68 | 0-0  | 0.00-0.00   |
| Fukushima |                        |    |      |             |      |             |
|           | Apr 5 to Apr 11, 2021  | 26 | 0-5  | 0.00-23.81  | 0-0  | 0.00-0.00   |
|           | Apr 12 to Apr 18, 2021 | 24 | 0-3  | 0.00-14.29  | 0-0  | 0.00-0.00   |
|           | Apr 19 to Apr 25, 2021 | 23 | 0-2  | 0.00-9.52   | 0-0  | 0.00-0.00   |
|           | Apr 26 to May 2, 2021  | 24 | 0-3  | 0.00-14.29  | 0-0  | 0.00-0.00   |
|           | May 3 to May 9, 2021   | 20 | 0-0  | 0.00-0.00   | 0-1  | 0.00-4.76   |
|           | May 10 to May 16, 2021 | 30 | 0-10 | 0.00-50.00  | 0-0  | 0.00-0.00   |
|           | May 17 to May 23, 2021 | 22 | 0-1  | 0.00-4.76   | 0-0  | 0.00-0.00   |
|           | May 24 to May 30, 2021 | 19 | 0-0  | 0.00-0.00   | 0-1  | 0.00-5.00   |
| Ibaraki   |                        |    |      |             |      |             |
|           | Apr 5 to Apr 11, 2021  | 21 | 0-0  | 0.00-0.00   | 0-7  | 0.00-25.00  |
|           | Apr 12 to Apr 18, 2021 | 35 | 0-7  | 0.00-25.00  | 0-0  | 0.00-0.00   |
|           | Apr 19 to Apr 25, 2021 | 16 | 0-0  | 0.00-0.00   | 1-11 | 3.70-40.74  |
|           | Apr 26 to May 2, 2021  | 23 | 0-0  | 0.00-0.00   | 0-3  | 0.00-11.54  |
|           | May 3 to May 9, 2021   | 30 | 0-4  | 0.00-15.38  | 0-0  | 0.00-0.00   |
|           | May 10 to May 16, 2021 | 32 | 0-7  | 0.00-28.00  | 0-0  | 0.00-0.00   |
|           | May 17 to May 23, 2021 | 23 | 0-0  | 0.00-0.00   | 0-2  | 0.00-8.00   |
|           | May 24 to May 30, 2021 | 40 | 4-15 | 16.00-60.00 | 0-0  | 0.00-0.00   |
| Tochigi   |                        |    |      |             |      |             |
|           | Apr 5 to Apr 11, 2021  | 28 | 0-9  | 0.00-47.37  | 0-0  | 0.00-0.00   |
|           | Apr 12 to Apr 18, 2021 | 30 | 1-10 | 5.00-50.00  | 0-0  | 0.00-0.00   |
|           | Apr 19 to Apr 25, 2021 | 26 | 0-7  | 0.00-36.84  | 0-0  | 0.00-0.00   |
|           | Apr 26 to May 2, 2021  | 24 | 0-5  | 0.00-26.32  | 0-0  | 0.00-0.00   |
|           | May 3 to May 9, 2021   | 17 | 0-0  | 0.00-0.00   | 0-1  | 0.00-5.56   |
|           | May 10 to May 16, 2021 | 12 | 0-0  | 0.00-0.00   | 0-5  | 0.00-29.41  |

|          |                        |     |       |             |      |            |
|----------|------------------------|-----|-------|-------------|------|------------|
|          | May 17 to May 23, 2021 | 13  | 0-0   | 0.00-0.00   | 0-4  | 0.00-23.53 |
|          | May 24 to May 30, 2021 | 17  | 0-0   | 0.00-0.00   | 0-0  | 0.00-0.00  |
| Gunma    |                        |     |       |             |      |            |
|          | Apr 5 to Apr 11, 2021  | 20  | 0-0   | 0.00-0.00   | 0-2  | 0.00-9.09  |
|          | Apr 12 to Apr 18, 2021 | 25  | 0-3   | 0.00-13.64  | 0-0  | 0.00-0.00  |
|          | Apr 19 to Apr 25, 2021 | 40  | 10-19 | 47.62-90.48 | 0-0  | 0.00-0.00  |
|          | Apr 26 to May 2, 2021  | 28  | 0-7   | 0.00-33.33  | 0-0  | 0.00-0.00  |
|          | May 3 to May 9, 2021   | 24  | 0-3   | 0.00-14.29  | 0-0  | 0.00-0.00  |
|          | May 10 to May 16, 2021 | 12  | 0-0   | 0.00-0.00   | 0-8  | 0.00-40.00 |
|          | May 17 to May 23, 2021 | 17  | 0-0   | 0.00-0.00   | 0-3  | 0.00-15.00 |
|          | May 24 to May 30, 2021 | 25  | 0-5   | 0.00-25.00  | 0-0  | 0.00-0.00  |
| Saitama  |                        |     |       |             |      |            |
|          | Apr 5 to Apr 11, 2021  | 62  | 0-2   | 0.00-3.33   | 0-0  | 0.00-0.00  |
|          | Apr 12 to Apr 18, 2021 | 71  | 0-13  | 0.00-22.41  | 0-0  | 0.00-0.00  |
|          | Apr 19 to Apr 25, 2021 | 63  | 0-6   | 0.00-10.53  | 0-0  | 0.00-0.00  |
|          | Apr 26 to May 2, 2021  | 70  | 0-14  | 0.00-25.00  | 0-0  | 0.00-0.00  |
|          | May 3 to May 9, 2021   | 62  | 0-5   | 0.00-8.77   | 0-0  | 0.00-0.00  |
|          | May 10 to May 16, 2021 | 65  | 0-9   | 0.00-16.07  | 0-0  | 0.00-0.00  |
|          | May 17 to May 23, 2021 | 50  | 0-0   | 0.00-0.00   | 0-6  | 0.00-10.71 |
|          | May 24 to May 30, 2021 | 57  | 0-1   | 0.00-1.79   | 0-0  | 0.00-0.00  |
| Chiba    |                        |     |       |             |      |            |
|          | Apr 5 to Apr 11, 2021  | 53  | 0-4   | 0.00-8.16   | 0-0  | 0.00-0.00  |
|          | Apr 12 to Apr 18, 2021 | 43  | 0-0   | 0.00-0.00   | 0-4  | 0.00-8.51  |
|          | Apr 19 to Apr 25, 2021 | 52  | 0-4   | 0.00-8.33   | 0-0  | 0.00-0.00  |
|          | Apr 26 to May 2, 2021  | 42  | 0-0   | 0.00-0.00   | 0-6  | 0.00-12.50 |
|          | May 3 to May 9, 2021   | 55  | 0-5   | 0.00-10.00  | 0-0  | 0.00-0.00  |
|          | May 10 to May 16, 2021 | 50  | 0-0   | 0.00-0.00   | 0-0  | 0.00-0.00  |
|          | May 17 to May 23, 2021 | 49  | 0-0   | 0.00-0.00   | 0-1  | 0.00-2.00  |
|          | May 24 to May 30, 2021 | 50  | 0-0   | 0.00-0.00   | 0-1  | 0.00-1.96  |
| Tokyo    |                        |     |       |             |      |            |
|          | Apr 5 to Apr 11, 2021  | 129 | 0-8   | 0.00-6.61   | 0-0  | 0.00-0.00  |
|          | Apr 12 to Apr 18, 2021 | 129 | 0-7   | 0.00-5.74   | 0-0  | 0.00-0.00  |
|          | Apr 19 to Apr 25, 2021 | 121 | 0-0   | 0.00-0.00   | 0-0  | 0.00-0.00  |
|          | Apr 26 to May 2, 2021  | 136 | 0-15  | 0.00-12.40  | 0-0  | 0.00-0.00  |
|          | May 3 to May 9, 2021   | 135 | 0-16  | 0.00-13.45  | 0-0  | 0.00-0.00  |
|          | May 10 to May 16, 2021 | 145 | 7-29  | 6.03-25.00  | 0-0  | 0.00-0.00  |
|          | May 17 to May 23, 2021 | 129 | 0-14  | 0.00-12.17  | 0-0  | 0.00-0.00  |
|          | May 24 to May 30, 2021 | 109 | 0-0   | 0.00-0.00   | 0-4  | 0.00-3.54  |
| Kanagawa |                        |     |       |             |      |            |
|          | Apr 5 to Apr 11, 2021  | 98  | 0-0   | 0.00-0.00   | 0-2  | 0.00-2.00  |
|          | Apr 12 to Apr 18, 2021 | 108 | 0-8   | 0.00-8.00   | 0-0  | 0.00-0.00  |
|          | Apr 19 to Apr 25, 2021 | 83  | 0-0   | 0.00-0.00   | 0-17 | 0.00-17.00 |
|          | Apr 26 to May 2, 2021  | 125 | 5-25  | 5.00-25.00  | 0-0  | 0.00-0.00  |
|          | May 3 to May 9, 2021   | 123 | 3-23  | 3.00-23.00  | 0-0  | 0.00-0.00  |
|          | May 10 to May 16, 2021 | 125 | 3-24  | 2.97-23.76  | 0-0  | 0.00-0.00  |
|          | May 17 to May 23, 2021 | 102 | 0-1   | 0.00-0.99   | 0-0  | 0.00-0.00  |

|                        |                        |     |            |            |           |            |
|------------------------|------------------------|-----|------------|------------|-----------|------------|
| Niigata                | May 24 to May 30, 2021 | 104 | 0-3        | 0.00-2.97  | 0-0       | 0.00-0.00  |
|                        | Apr 5 to Apr 11, 2021  | 29  | 0-0        | 0.00-0.00  | 0-9       | 0.00-23.68 |
|                        | Apr 12 to Apr 18, 2021 | 40  | 0-3        | 0.00-8.11  | 0-0       | 0.00-0.00  |
|                        | Apr 19 to Apr 25, 2021 | 35  | 0-0        | 0.00-0.00  | 0-1       | 0.00-2.78  |
|                        | Apr 26 to May 2, 2021  | 33  | 0-0        | 0.00-0.00  | 0-3       | 0.00-8.33  |
|                        | May 3 to May 9, 2021   | 40  | 0-4        | 0.00-11.11 | 0-0       | 0.00-0.00  |
|                        | May 10 to May 16, 2021 | 39  | 0-2        | 0.00-5.41  | 0-0       | 0.00-0.00  |
|                        | May 17 to May 23, 2021 | 40  | 0-5        | 0.00-14.29 | 0-0       | 0.00-0.00  |
| Toyama                 | May 24 to May 30, 2021 | 36  | 0-1        | 0.00-2.86  | 0-0       | 0.00-0.00  |
|                        | Apr 5 to Apr 11, 2021  | 16  | 0-2        | 0.00-14.29 | 0-0       | 0.00-0.00  |
|                        | Apr 12 to Apr 18, 2021 | 12  | 0-0        | 0.00-0.00  | 0-2       | 0.00-14.29 |
|                        | Apr 19 to Apr 25, 2021 | 16  | 0-2        | 0.00-14.29 | 0-0       | 0.00-0.00  |
|                        | Apr 26 to May 2, 2021  | 18  | 0-5        | 0.00-38.46 | 0-0       | 0.00-0.00  |
|                        | May 3 to May 9, 2021   | 13  | 0-0        | 0.00-0.00  | 0-1       | 0.00-7.14  |
|                        | May 10 to May 16, 2021 | 13  | 0-0        | 0.00-0.00  | 0-0       | 0.00-0.00  |
|                        | May 17 to May 23, 2021 | 14  | 0-1        | 0.00-7.69  | 0-0       | 0.00-0.00  |
| Ishikawa               | May 24 to May 30, 2021 | 9   | 0-0        | 0.00-0.00  | 0-3       | 0.00-25.00 |
|                        | Apr 5 to Apr 11, 2021  | 11  | 0-0        | 0.00-0.00  | 0-3       | 0.00-21.43 |
|                        | Apr 12 to Apr 18, 2021 | 11  | 0-0        | 0.00-0.00  | 0-2       | 0.00-15.38 |
|                        | Apr 19 to Apr 25, 2021 | 14  | 0-2        | 0.00-16.67 | 0-0       | 0.00-0.00  |
|                        | Apr 26 to May 2, 2021  | 9   | 0-0        | 0.00-0.00  | 0-4       | 0.00-30.77 |
|                        | May 3 to May 9, 2021   | 11  | 0-0        | 0.00-0.00  | 0-2       | 0.00-15.38 |
|                        | May 10 to May 16, 2021 | 9   | 0-0        | 0.00-0.00  | 0-4       | 0.00-30.77 |
|                        | May 17 to May 23, 2021 | 8   | 0-0        | 0.00-0.00  | 0-4       | 0.00-33.33 |
| Fukui                  | May 24 to May 30, 2021 | 14  | 0-2        | 0.00-16.67 | 0-0       | 0.00-0.00  |
|                        | Apr 5 to Apr 11, 2021  | 7   | 0-0        | 0.00-0.00  | 0-2       | 0.00-22.22 |
|                        | Apr 12 to Apr 18, 2021 | 12  | 0-3        | 0.00-33.33 | 0-0       | 0.00-0.00  |
|                        | Apr 19 to Apr 25, 2021 | 11  | 0-2        | 0.00-22.22 | 0-0       | 0.00-0.00  |
|                        | Apr 26 to May 2, 2021  | 8   | 0-0        | 0.00-0.00  | 0-1       | 0.00-11.11 |
|                        | May 3 to May 9, 2021   | 10  | 0-1        | 0.00-11.11 | 0-0       | 0.00-0.00  |
|                        | May 10 to May 16, 2021 | 11  | 0-3        | 0.00-37.50 | 0-0       | 0.00-0.00  |
|                        | May 17 to May 23, 2021 | 12  | 0-4        | 0.00-50.00 | 0-0       | 0.00-0.00  |
| Yamanashi              | May 24 to May 30, 2021 | 11  | 0-3        | 0.00-37.50 | 0-0       | 0.00-0.00  |
|                        | Apr 5 to Apr 11, 2021  | 12  | 0-1        | 0.00-9.09  | 0-0       | 0.00-0.00  |
|                        | Apr 12 to Apr 18, 2021 | 10  | 0-0        | 0.00-0.00  | 0-0       | 0.00-0.00  |
|                        | Apr 19 to Apr 25, 2021 | 9   | 0-0        | 0.00-0.00  | 0-1       | 0.00-10.00 |
|                        | Apr 26 to May 2, 2021  | 13  | 0-3        | 0.00-30.00 | 0-0       | 0.00-0.00  |
|                        | May 3 to May 9, 2021   | 10  | 0-0        | 0.00-0.00  | 0-0       | 0.00-0.00  |
|                        | May 10 to May 16, 2021 | 10  | 0-1        | 0.00-11.11 | 0-0       | 0.00-0.00  |
|                        | May 17 to May 23, 2021 | 10  | 0-1        | 0.00-11.11 | 0-0       | 0.00-0.00  |
| May 24 to May 30, 2021 | 10                     | 0-1 | 0.00-11.11 | 0-0        | 0.00-0.00 |            |

Nagano

|                        |    |      |            |     |            |
|------------------------|----|------|------------|-----|------------|
| Apr 5 to Apr 11, 2021  | 30 | 0-0  | 0.00-0.00  | 0-3 | 0.00-9.09  |
| Apr 12 to Apr 18, 2021 | 29 | 0-0  | 0.00-0.00  | 0-4 | 0.00-12.12 |
| Apr 19 to Apr 25, 2021 | 36 | 0-3  | 0.00-9.09  | 0-0 | 0.00-0.00  |
| Apr 26 to May 2, 2021  | 44 | 0-10 | 0.00-29.41 | 0-0 | 0.00-0.00  |
| May 3 to May 9, 2021   | 31 | 0-0  | 0.00-0.00  | 0-2 | 0.00-6.06  |
| May 10 to May 16, 2021 | 37 | 0-4  | 0.00-12.12 | 0-0 | 0.00-0.00  |
| May 17 to May 23, 2021 | 40 | 0-7  | 0.00-21.21 | 0-0 | 0.00-0.00  |
| May 24 to May 30, 2021 | 26 | 0-0  | 0.00-0.00  | 0-6 | 0.00-18.75 |

Gifu

|                        |    |      |             |     |            |
|------------------------|----|------|-------------|-----|------------|
| Apr 5 to Apr 11, 2021  | 30 | 0-3  | 0.00-11.11  | 0-0 | 0.00-0.00  |
| Apr 12 to Apr 18, 2021 | 31 | 0-6  | 0.00-24.00  | 0-0 | 0.00-0.00  |
| Apr 19 to Apr 25, 2021 | 25 | 0-0  | 0.00-0.00   | 0-1 | 0.00-3.85  |
| Apr 26 to May 2, 2021  | 29 | 0-3  | 0.00-11.54  | 0-0 | 0.00-0.00  |
| May 3 to May 9, 2021   | 30 | 0-5  | 0.00-20.00  | 0-0 | 0.00-0.00  |
| May 10 to May 16, 2021 | 26 | 0-2  | 0.00-8.33   | 0-0 | 0.00-0.00  |
| May 17 to May 23, 2021 | 38 | 4-14 | 16.67-58.33 | 0-0 | 0.00-0.00  |
| May 24 to May 30, 2021 | 17 | 0-0  | 0.00-0.00   | 0-8 | 0.00-32.00 |

Shizuoka

|                        |    |     |            |     |            |
|------------------------|----|-----|------------|-----|------------|
| Apr 5 to Apr 11, 2021  | 63 | 0-0 | 0.00-0.00  | 0-7 | 0.00-10.00 |
| Apr 12 to Apr 18, 2021 | 65 | 0-0 | 0.00-0.00  | 0-5 | 0.00-7.14  |
| Apr 19 to Apr 25, 2021 | 65 | 0-0 | 0.00-0.00  | 0-4 | 0.00-5.80  |
| Apr 26 to May 2, 2021  | 75 | 0-7 | 0.00-10.29 | 0-0 | 0.00-0.00  |
| May 3 to May 9, 2021   | 66 | 0-0 | 0.00-0.00  | 0-0 | 0.00-0.00  |
| May 10 to May 16, 2021 | 64 | 0-0 | 0.00-0.00  | 0-1 | 0.00-1.54  |
| May 17 to May 23, 2021 | 68 | 0-3 | 0.00-4.62  | 0-0 | 0.00-0.00  |
| May 24 to May 30, 2021 | 65 | 0-0 | 0.00-0.00  | 0-1 | 0.00-1.52  |

Aichi

|                        |    |      |            |      |            |
|------------------------|----|------|------------|------|------------|
| Apr 5 to Apr 11, 2021  | 77 | 0-0  | 0.00-0.00  | 0-9  | 0.00-10.47 |
| Apr 12 to Apr 18, 2021 | 99 | 0-14 | 0.00-16.47 | 0-0  | 0.00-0.00  |
| Apr 19 to Apr 25, 2021 | 82 | 0-0  | 0.00-0.00  | 0-2  | 0.00-2.38  |
| Apr 26 to May 2, 2021  | 99 | 0-16 | 0.00-19.28 | 0-0  | 0.00-0.00  |
| May 3 to May 9, 2021   | 81 | 0-1  | 0.00-1.25  | 0-0  | 0.00-0.00  |
| May 10 to May 16, 2021 | 98 | 0-18 | 0.00-22.50 | 0-0  | 0.00-0.00  |
| May 17 to May 23, 2021 | 69 | 0-0  | 0.00-0.00  | 0-12 | 0.00-14.81 |
| May 24 to May 30, 2021 | 91 | 0-11 | 0.00-13.75 | 0-0  | 0.00-0.00  |

Mie

|                        |    |      |            |     |            |
|------------------------|----|------|------------|-----|------------|
| Apr 5 to Apr 11, 2021  | 25 | 0-0  | 0.00-0.00  | 0-3 | 0.00-10.71 |
| Apr 12 to Apr 18, 2021 | 26 | 0-0  | 0.00-0.00  | 0-1 | 0.00-3.70  |
| Apr 19 to Apr 25, 2021 | 32 | 0-5  | 0.00-18.52 | 0-0 | 0.00-0.00  |
| Apr 26 to May 2, 2021  | 27 | 0-0  | 0.00-0.00  | 0-0 | 0.00-0.00  |
| May 3 to May 9, 2021   | 32 | 0-6  | 0.00-23.08 | 0-0 | 0.00-0.00  |
| May 10 to May 16, 2021 | 25 | 0-0  | 0.00-0.00  | 0-1 | 0.00-3.85  |
| May 17 to May 23, 2021 | 39 | 2-13 | 7.69-50.00 | 0-0 | 0.00-0.00  |
| May 24 to May 30, 2021 | 28 | 0-2  | 0.00-7.69  | 0-0 | 0.00-0.00  |

Shiga

|          |                        |    |      |             |      |            |
|----------|------------------------|----|------|-------------|------|------------|
|          | Apr 5 to Apr 11, 2021  | 11 | 0-0  | 0.00-0.00   | 0-0  | 0.00-0.00  |
|          | Apr 12 to Apr 18, 2021 | 11 | 0-0  | 0.00-0.00   | 0-0  | 0.00-0.00  |
|          | Apr 19 to Apr 25, 2021 | 10 | 0-0  | 0.00-0.00   | 0-2  | 0.00-16.67 |
|          | Apr 26 to May 2, 2021  | 16 | 0-4  | 0.00-33.33  | 0-0  | 0.00-0.00  |
|          | May 3 to May 9, 2021   | 19 | 0-8  | 0.00-72.73  | 0-0  | 0.00-0.00  |
|          | May 10 to May 16, 2021 | 15 | 0-3  | 0.00-25.00  | 0-0  | 0.00-0.00  |
|          | May 17 to May 23, 2021 | 11 | 0-0  | 0.00-0.00   | 0-1  | 0.00-8.33  |
|          | May 24 to May 30, 2021 | 18 | 0-6  | 0.00-50.00  | 0-0  | 0.00-0.00  |
| Kyoto    |                        |    |      |             |      |            |
|          | Apr 5 to Apr 11, 2021  | 24 | 0-0  | 0.00-0.00   | 0-1  | 0.00-4.00  |
|          | Apr 12 to Apr 18, 2021 | 28 | 0-4  | 0.00-16.67  | 0-0  | 0.00-0.00  |
|          | Apr 19 to Apr 25, 2021 | 26 | 0-2  | 0.00-8.33   | 0-0  | 0.00-0.00  |
|          | Apr 26 to May 2, 2021  | 26 | 0-1  | 0.00-4.00   | 0-0  | 0.00-0.00  |
|          | May 3 to May 9, 2021   | 37 | 3-14 | 13.04-60.87 | 0-0  | 0.00-0.00  |
|          | May 10 to May 16, 2021 | 19 | 0-0  | 0.00-0.00   | 0-5  | 0.00-20.83 |
|          | May 17 to May 23, 2021 | 26 | 0-2  | 0.00-8.33   | 0-0  | 0.00-0.00  |
|          | May 24 to May 30, 2021 | 29 | 0-6  | 0.00-26.09  | 0-0  | 0.00-0.00  |
| Osaka    |                        |    |      |             |      |            |
|          | Apr 5 to Apr 11, 2021  | 66 | 0-3  | 0.00-4.76   | 0-0  | 0.00-0.00  |
|          | Apr 12 to Apr 18, 2021 | 67 | 0-6  | 0.00-9.84   | 0-0  | 0.00-0.00  |
|          | Apr 19 to Apr 25, 2021 | 69 | 0-8  | 0.00-13.11  | 0-0  | 0.00-0.00  |
|          | Apr 26 to May 2, 2021  | 75 | 0-14 | 0.00-22.95  | 0-0  | 0.00-0.00  |
|          | May 3 to May 9, 2021   | 58 | 0-0  | 0.00-0.00   | 0-1  | 0.00-1.69  |
|          | May 10 to May 16, 2021 | 78 | 1-18 | 1.67-30.00  | 0-0  | 0.00-0.00  |
|          | May 17 to May 23, 2021 | 67 | 0-8  | 0.00-13.56  | 0-0  | 0.00-0.00  |
|          | May 24 to May 30, 2021 | 54 | 0-0  | 0.00-0.00   | 0-4  | 0.00-6.90  |
| Hyogo    |                        |    |      |             |      |            |
|          | Apr 5 to Apr 11, 2021  | 49 | 0-0  | 0.00-0.00   | 0-8  | 0.00-14.04 |
|          | Apr 12 to Apr 18, 2021 | 50 | 0-0  | 0.00-0.00   | 0-8  | 0.00-13.79 |
|          | Apr 19 to Apr 25, 2021 | 67 | 0-9  | 0.00-15.52  | 0-0  | 0.00-0.00  |
|          | Apr 26 to May 2, 2021  | 72 | 0-14 | 0.00-24.14  | 0-0  | 0.00-0.00  |
|          | May 3 to May 9, 2021   | 72 | 0-15 | 0.00-26.32  | 0-0  | 0.00-0.00  |
|          | May 10 to May 16, 2021 | 55 | 0-0  | 0.00-0.00   | 0-2  | 0.00-3.51  |
|          | May 17 to May 23, 2021 | 68 | 0-12 | 0.00-21.43  | 0-0  | 0.00-0.00  |
|          | May 24 to May 30, 2021 | 41 | 0-0  | 0.00-0.00   | 0-14 | 0.00-25.45 |
| Nara     |                        |    |      |             |      |            |
|          | Apr 5 to Apr 11, 2021  | 15 | 0-0  | 0.00-0.00   | 0-0  | 0.00-0.00  |
|          | Apr 12 to Apr 18, 2021 | 18 | 0-3  | 0.00-20.00  | 0-0  | 0.00-0.00  |
|          | Apr 19 to Apr 25, 2021 | 16 | 0-1  | 0.00-6.67   | 0-0  | 0.00-0.00  |
|          | Apr 26 to May 2, 2021  | 19 | 0-4  | 0.00-26.67  | 0-0  | 0.00-0.00  |
|          | May 3 to May 9, 2021   | 11 | 0-0  | 0.00-0.00   | 0-4  | 0.00-26.67 |
|          | May 10 to May 16, 2021 | 18 | 0-3  | 0.00-20.00  | 0-0  | 0.00-0.00  |
|          | May 17 to May 23, 2021 | 23 | 0-8  | 0.00-53.33  | 0-0  | 0.00-0.00  |
|          | May 24 to May 30, 2021 | 19 | 0-4  | 0.00-26.67  | 0-0  | 0.00-0.00  |
| Wakayama |                        |    |      |             |      |            |
|          | Apr 5 to Apr 11, 2021  | 9  | 0-0  | 0.00-0.00   | 0-4  | 0.00-30.77 |

|           |                        |    |      |            |     |            |
|-----------|------------------------|----|------|------------|-----|------------|
|           | Apr 12 to Apr 18, 2021 | 16 | 0-3  | 0.00-23.08 | 0-0 | 0.00-0.00  |
|           | Apr 19 to Apr 25, 2021 | 18 | 0-5  | 0.00-38.46 | 0-0 | 0.00-0.00  |
|           | Apr 26 to May 2, 2021  | 10 | 0-0  | 0.00-0.00  | 0-3 | 0.00-23.08 |
|           | May 3 to May 9, 2021   | 14 | 0-1  | 0.00-7.69  | 0-0 | 0.00-0.00  |
|           | May 10 to May 16, 2021 | 16 | 0-2  | 0.00-14.29 | 0-0 | 0.00-0.00  |
|           | May 17 to May 23, 2021 | 11 | 0-0  | 0.00-0.00  | 0-3 | 0.00-21.43 |
|           | May 24 to May 30, 2021 | 18 | 0-4  | 0.00-28.57 | 0-0 | 0.00-0.00  |
| Tottori   |                        |    |      |            |     |            |
|           | Apr 5 to Apr 11, 2021  | 6  | 0-0  | 0.00-0.00  | 0-4 | 0.00-40.00 |
|           | Apr 12 to Apr 18, 2021 | 13 | 0-4  | 0.00-44.44 | 0-0 | 0.00-0.00  |
|           | Apr 19 to Apr 25, 2021 | 9  | 0-0  | 0.00-0.00  | 0-0 | 0.00-0.00  |
|           | Apr 26 to May 2, 2021  | 10 | 0-0  | 0.00-0.00  | 0-0 | 0.00-0.00  |
|           | May 3 to May 9, 2021   | 14 | 0-4  | 0.00-40.00 | 0-0 | 0.00-0.00  |
|           | May 10 to May 16, 2021 | 6  | 0-0  | 0.00-0.00  | 0-5 | 0.00-45.45 |
|           | May 17 to May 23, 2021 | 12 | 0-2  | 0.00-20.00 | 0-0 | 0.00-0.00  |
|           | May 24 to May 30, 2021 | 11 | 0-1  | 0.00-10.00 | 0-0 | 0.00-0.00  |
| Shimane   |                        |    |      |            |     |            |
|           | Apr 5 to Apr 11, 2021  | 13 | 0-1  | 0.00-8.33  | 0-0 | 0.00-0.00  |
|           | Apr 12 to Apr 18, 2021 | 12 | 0-0  | 0.00-0.00  | 0-0 | 0.00-0.00  |
|           | Apr 19 to Apr 25, 2021 | 13 | 0-1  | 0.00-8.33  | 0-0 | 0.00-0.00  |
|           | Apr 26 to May 2, 2021  | 14 | 0-2  | 0.00-16.67 | 0-0 | 0.00-0.00  |
|           | May 3 to May 9, 2021   | 10 | 0-0  | 0.00-0.00  | 0-1 | 0.00-9.09  |
|           | May 10 to May 16, 2021 | 12 | 0-2  | 0.00-20.00 | 0-0 | 0.00-0.00  |
|           | May 17 to May 23, 2021 | 13 | 0-3  | 0.00-30.00 | 0-0 | 0.00-0.00  |
|           | May 24 to May 30, 2021 | 14 | 0-4  | 0.00-40.00 | 0-0 | 0.00-0.00  |
| Okayama   |                        |    |      |            |     |            |
|           | Apr 5 to Apr 11, 2021  | 23 | 0-3  | 0.00-15.00 | 0-0 | 0.00-0.00  |
|           | Apr 12 to Apr 18, 2021 | 22 | 0-2  | 0.00-10.00 | 0-0 | 0.00-0.00  |
|           | Apr 19 to Apr 25, 2021 | 14 | 0-0  | 0.00-0.00  | 0-5 | 0.00-26.32 |
|           | Apr 26 to May 2, 2021  | 23 | 0-4  | 0.00-21.05 | 0-0 | 0.00-0.00  |
|           | May 3 to May 9, 2021   | 16 | 0-0  | 0.00-0.00  | 0-3 | 0.00-15.79 |
|           | May 10 to May 16, 2021 | 21 | 0-2  | 0.00-10.53 | 0-0 | 0.00-0.00  |
|           | May 17 to May 23, 2021 | 20 | 0-1  | 0.00-5.26  | 0-0 | 0.00-0.00  |
|           | May 24 to May 30, 2021 | 19 | 0-0  | 0.00-0.00  | 0-0 | 0.00-0.00  |
| Hiroshima |                        |    |      |            |     |            |
|           | Apr 5 to Apr 11, 2021  | 28 | 0-0  | 0.00-0.00  | 0-0 | 0.00-0.00  |
|           | Apr 12 to Apr 18, 2021 | 27 | 0-0  | 0.00-0.00  | 0-1 | 0.00-3.57  |
|           | Apr 19 to Apr 25, 2021 | 25 | 0-0  | 0.00-0.00  | 0-3 | 0.00-10.71 |
|           | Apr 26 to May 2, 2021  | 32 | 0-5  | 0.00-18.52 | 0-0 | 0.00-0.00  |
|           | May 3 to May 9, 2021   | 36 | 0-10 | 0.00-38.46 | 0-0 | 0.00-0.00  |
|           | May 10 to May 16, 2021 | 28 | 0-3  | 0.00-12.00 | 0-0 | 0.00-0.00  |
|           | May 17 to May 23, 2021 | 30 | 0-5  | 0.00-20.00 | 0-0 | 0.00-0.00  |
|           | May 24 to May 30, 2021 | 23 | 0-0  | 0.00-0.00  | 0-1 | 0.00-4.17  |
| Yamaguchi |                        |    |      |            |     |            |
|           | Apr 5 to Apr 11, 2021  | 14 | 0-0  | 0.00-0.00  | 0-2 | 0.00-12.50 |
|           | Apr 12 to Apr 18, 2021 | 23 | 0-8  | 0.00-53.33 | 0-0 | 0.00-0.00  |

|           |                        |    |      |             |     |             |
|-----------|------------------------|----|------|-------------|-----|-------------|
|           | Apr 19 to Apr 25, 2021 | 15 | 0-0  | 0.00-0.00   | 0-1 | 0.00-6.25   |
|           | Apr 26 to May 2, 2021  | 25 | 1-9  | 6.25-56.25  | 0-0 | 0.00-0.00   |
|           | May 3 to May 9, 2021   | 19 | 0-3  | 0.00-18.75  | 0-0 | 0.00-0.00   |
|           | May 10 to May 16, 2021 | 7  | 0-0  | 0.00-0.00   | 2-9 | 12.50-56.25 |
|           | May 17 to May 23, 2021 | 19 | 0-2  | 0.00-11.76  | 0-0 | 0.00-0.00   |
|           | May 24 to May 30, 2021 | 11 | 0-0  | 0.00-0.00   | 0-6 | 0.00-35.29  |
| Tokushima |                        |    |      |             |     |             |
|           | Apr 5 to Apr 11, 2021  | 9  | 0-0  | 0.00-0.00   | 0-1 | 0.00-10.00  |
|           | Apr 12 to Apr 18, 2021 | 12 | 0-2  | 0.00-20.00  | 0-0 | 0.00-0.00   |
|           | Apr 19 to Apr 25, 2021 | 10 | 0-1  | 0.00-11.11  | 0-0 | 0.00-0.00   |
|           | Apr 26 to May 2, 2021  | 5  | 0-0  | 0.00-0.00   | 0-4 | 0.00-44.44  |
|           | May 3 to May 9, 2021   | 7  | 0-0  | 0.00-0.00   | 0-2 | 0.00-22.22  |
|           | May 10 to May 16, 2021 | 10 | 0-0  | 0.00-0.00   | 0-0 | 0.00-0.00   |
|           | May 17 to May 23, 2021 | 12 | 0-3  | 0.00-33.33  | 0-0 | 0.00-0.00   |
|           | May 24 to May 30, 2021 | 6  | 0-0  | 0.00-0.00   | 0-4 | 0.00-40.00  |
| Kagawa    |                        |    |      |             |     |             |
|           | Apr 5 to Apr 11, 2021  | 11 | 0-0  | 0.00-0.00   | 0-4 | 0.00-26.67  |
|           | Apr 12 to Apr 18, 2021 | 21 | 0-6  | 0.00-40.00  | 0-0 | 0.00-0.00   |
|           | Apr 19 to Apr 25, 2021 | 15 | 0-1  | 0.00-7.14   | 0-0 | 0.00-0.00   |
|           | Apr 26 to May 2, 2021  | 25 | 2-10 | 13.33-66.67 | 0-0 | 0.00-0.00   |
|           | May 3 to May 9, 2021   | 13 | 0-0  | 0.00-0.00   | 0-2 | 0.00-13.33  |
|           | May 10 to May 16, 2021 | 16 | 0-1  | 0.00-6.67   | 0-0 | 0.00-0.00   |
|           | May 17 to May 23, 2021 | 15 | 0-0  | 0.00-0.00   | 0-0 | 0.00-0.00   |
|           | May 24 to May 30, 2021 | 17 | 0-2  | 0.00-13.33  | 0-0 | 0.00-0.00   |
| Ehime     |                        |    |      |             |     |             |
|           | Apr 5 to Apr 11, 2021  | 24 | 0-7  | 0.00-41.18  | 0-0 | 0.00-0.00   |
|           | Apr 12 to Apr 18, 2021 | 16 | 0-0  | 0.00-0.00   | 0-0 | 0.00-0.00   |
|           | Apr 19 to Apr 25, 2021 | 20 | 0-4  | 0.00-25.00  | 0-0 | 0.00-0.00   |
|           | Apr 26 to May 2, 2021  | 21 | 0-5  | 0.00-31.25  | 0-0 | 0.00-0.00   |
|           | May 3 to May 9, 2021   | 20 | 0-4  | 0.00-25.00  | 0-0 | 0.00-0.00   |
|           | May 10 to May 16, 2021 | 19 | 0-3  | 0.00-18.75  | 0-0 | 0.00-0.00   |
|           | May 17 to May 23, 2021 | 14 | 0-0  | 0.00-0.00   | 0-1 | 0.00-6.67   |
|           | May 24 to May 30, 2021 | 14 | 0-0  | 0.00-0.00   | 0-0 | 0.00-0.00   |
| Kochi     |                        |    |      |             |     |             |
|           | Apr 5 to Apr 11, 2021  | 6  | 0-1  | 0.00-20.00  | 0-0 | 0.00-0.00   |
|           | Apr 12 to Apr 18, 2021 | 9  | 0-4  | 0.00-80.00  | 0-0 | 0.00-0.00   |
|           | Apr 19 to Apr 25, 2021 | 8  | 0-3  | 0.00-60.00  | 0-0 | 0.00-0.00   |
|           | Apr 26 to May 2, 2021  | 5  | 0-0  | 0.00-0.00   | 0-1 | 0.00-16.67  |
|           | May 3 to May 9, 2021   | 7  | 0-1  | 0.00-16.67  | 0-0 | 0.00-0.00   |
|           | May 10 to May 16, 2021 | 3  | 0-0  | 0.00-0.00   | 0-3 | 0.00-50.00  |
|           | May 17 to May 23, 2021 | 6  | 0-0  | 0.00-0.00   | 0-0 | 0.00-0.00   |
|           | May 24 to May 30, 2021 | 7  | 0-0  | 0.00-0.00   | 0-0 | 0.00-0.00   |
| Fukuoka   |                        |    |      |             |     |             |
|           | Apr 5 to Apr 11, 2021  | 27 | 0-0  | 0.00-0.00   | 0-6 | 0.00-18.18  |
|           | Apr 12 to Apr 18, 2021 | 33 | 0-0  | 0.00-0.00   | 0-1 | 0.00-2.94   |
|           | Apr 19 to Apr 25, 2021 | 29 | 0-0  | 0.00-0.00   | 0-5 | 0.00-14.71  |



|          |                        |    |      |              |     |            |
|----------|------------------------|----|------|--------------|-----|------------|
|          | Apr 26 to May 2, 2021  | 37 | 0-4  | 0.00-12.12   | 0-0 | 0.00-0.00  |
|          | May 3 to May 9, 2021   | 35 | 0-3  | 0.00-9.38    | 0-0 | 0.00-0.00  |
|          | May 10 to May 16, 2021 | 46 | 2-14 | 6.25-43.75   | 0-0 | 0.00-0.00  |
|          | May 17 to May 23, 2021 | 28 | 0-0  | 0.00-0.00    | 0-3 | 0.00-9.68  |
|          | May 24 to May 30, 2021 | 37 | 0-6  | 0.00-19.35   | 0-0 | 0.00-0.00  |
| Saga     |                        |    |      |              |     |            |
|          | Apr 5 to Apr 11, 2021  | 8  | 0-1  | 0.00-14.29   | 0-0 | 0.00-0.00  |
|          | Apr 12 to Apr 18, 2021 | 7  | 0-0  | 0.00-0.00    | 0-0 | 0.00-0.00  |
|          | Apr 19 to Apr 25, 2021 | 6  | 0-0  | 0.00-0.00    | 0-1 | 0.00-14.29 |
|          | Apr 26 to May 2, 2021  | 7  | 0-0  | 0.00-0.00    | 0-0 | 0.00-0.00  |
|          | May 3 to May 9, 2021   | 15 | 3-8  | 42.86-114.29 | 0-0 | 0.00-0.00  |
|          | May 10 to May 16, 2021 | 6  | 0-0  | 0.00-0.00    | 0-1 | 0.00-14.29 |
|          | May 17 to May 23, 2021 | 9  | 0-2  | 0.00-28.57   | 0-0 | 0.00-0.00  |
|          | May 24 to May 30, 2021 | 5  | 0-0  | 0.00-0.00    | 0-2 | 0.00-28.57 |
| Nagasaki |                        |    |      |              |     |            |
|          | Apr 5 to Apr 11, 2021  | 20 | 3-10 | 30.00-100.00 | 0-0 | 0.00-0.00  |
|          | Apr 12 to Apr 18, 2021 | 14 | 0-4  | 0.00-40.00   | 0-0 | 0.00-0.00  |
|          | Apr 19 to Apr 25, 2021 | 17 | 1-7  | 10.00-70.00  | 0-0 | 0.00-0.00  |
|          | Apr 26 to May 2, 2021  | 10 | 0-0  | 0.00-0.00    | 0-0 | 0.00-0.00  |
|          | May 3 to May 9, 2021   | 20 | 5-11 | 55.56-122.22 | 0-0 | 0.00-0.00  |
|          | May 10 to May 16, 2021 | 14 | 0-5  | 0.00-55.56   | 0-0 | 0.00-0.00  |
|          | May 17 to May 23, 2021 | 9  | 0-0  | 0.00-0.00    | 0-0 | 0.00-0.00  |
|          | May 24 to May 30, 2021 | 17 | 2-8  | 22.22-88.89  | 0-0 | 0.00-0.00  |
| Kumamoto |                        |    |      |              |     |            |
|          | Apr 5 to Apr 11, 2021  | 24 | 0-7  | 0.00-41.18   | 0-0 | 0.00-0.00  |
|          | Apr 12 to Apr 18, 2021 | 22 | 0-6  | 0.00-37.50   | 0-0 | 0.00-0.00  |
|          | Apr 19 to Apr 25, 2021 | 17 | 0-1  | 0.00-6.25    | 0-0 | 0.00-0.00  |
|          | Apr 26 to May 2, 2021  | 22 | 0-6  | 0.00-37.50   | 0-0 | 0.00-0.00  |
|          | May 3 to May 9, 2021   | 25 | 0-8  | 0.00-47.06   | 0-0 | 0.00-0.00  |
|          | May 10 to May 16, 2021 | 22 | 0-5  | 0.00-29.41   | 0-0 | 0.00-0.00  |
|          | May 17 to May 23, 2021 | 18 | 0-1  | 0.00-5.88    | 0-0 | 0.00-0.00  |
|          | May 24 to May 30, 2021 | 24 | 0-7  | 0.00-41.18   | 0-0 | 0.00-0.00  |
| Oita     |                        |    |      |              |     |            |
|          | Apr 5 to Apr 11, 2021  | 11 | 0-0  | 0.00-0.00    | 0-6 | 0.00-35.29 |
|          | Apr 12 to Apr 18, 2021 | 12 | 0-0  | 0.00-0.00    | 0-6 | 0.00-33.33 |
|          | Apr 19 to Apr 25, 2021 | 19 | 0-2  | 0.00-11.76   | 0-0 | 0.00-0.00  |
|          | Apr 26 to May 2, 2021  | 20 | 0-4  | 0.00-25.00   | 0-0 | 0.00-0.00  |
|          | May 3 to May 9, 2021   | 11 | 0-0  | 0.00-0.00    | 0-5 | 0.00-31.25 |
|          | May 10 to May 16, 2021 | 15 | 0-0  | 0.00-0.00    | 0-1 | 0.00-6.25  |
|          | May 17 to May 23, 2021 | 12 | 0-0  | 0.00-0.00    | 0-4 | 0.00-25.00 |
|          | May 24 to May 30, 2021 | 14 | 0-0  | 0.00-0.00    | 0-1 | 0.00-6.67  |
| Miyazaki |                        |    |      |              |     |            |
|          | Apr 5 to Apr 11, 2021  | 12 | 0-0  | 0.00-0.00    | 0-1 | 0.00-7.69  |
|          | Apr 12 to Apr 18, 2021 | 13 | 0-1  | 0.00-8.33    | 0-0 | 0.00-0.00  |
|          | Apr 19 to Apr 25, 2021 | 17 | 0-5  | 0.00-41.67   | 0-0 | 0.00-0.00  |
|          | Apr 26 to May 2, 2021  | 10 | 0-0  | 0.00-0.00    | 0-2 | 0.00-16.67 |

|           |                        |    |     |             |     |            |
|-----------|------------------------|----|-----|-------------|-----|------------|
|           | May 3 to May 9, 2021   | 17 | 0-6 | 0.00-54.55  | 0-0 | 0.00-0.00  |
|           | May 10 to May 16, 2021 | 9  | 0-0 | 0.00-0.00   | 0-2 | 0.00-18.18 |
|           | May 17 to May 23, 2021 | 14 | 0-3 | 0.00-27.27  | 0-0 | 0.00-0.00  |
|           | May 24 to May 30, 2021 | 14 | 0-3 | 0.00-27.27  | 0-0 | 0.00-0.00  |
| Kagoshima |                        |    |     |             |     |            |
|           | Apr 5 to Apr 11, 2021  | 20 | 0-3 | 0.00-17.65  | 0-0 | 0.00-0.00  |
|           | Apr 12 to Apr 18, 2021 | 25 | 0-8 | 0.00-47.06  | 0-0 | 0.00-0.00  |
|           | Apr 19 to Apr 25, 2021 | 16 | 0-0 | 0.00-0.00   | 0-1 | 0.00-5.88  |
|           | Apr 26 to May 2, 2021  | 22 | 0-5 | 0.00-29.41  | 0-0 | 0.00-0.00  |
|           | May 3 to May 9, 2021   | 18 | 0-1 | 0.00-5.88   | 0-0 | 0.00-0.00  |
|           | May 10 to May 16, 2021 | 21 | 0-4 | 0.00-23.53  | 0-0 | 0.00-0.00  |
|           | May 17 to May 23, 2021 | 19 | 0-2 | 0.00-11.76  | 0-0 | 0.00-0.00  |
|           | May 24 to May 30, 2021 | 20 | 0-3 | 0.00-17.65  | 0-0 | 0.00-0.00  |
| Okinawa   |                        |    |     |             |     |            |
|           | Apr 5 to Apr 11, 2021  | 13 | 0-2 | 0.00-18.18  | 0-0 | 0.00-0.00  |
|           | Apr 12 to Apr 18, 2021 | 16 | 0-5 | 0.00-45.45  | 0-0 | 0.00-0.00  |
|           | Apr 19 to Apr 25, 2021 | 8  | 0-0 | 0.00-0.00   | 0-2 | 0.00-20.00 |
|           | Apr 26 to May 2, 2021  | 13 | 0-2 | 0.00-18.18  | 0-0 | 0.00-0.00  |
|           | May 3 to May 9, 2021   | 10 | 0-0 | 0.00-0.00   | 0-0 | 0.00-0.00  |
|           | May 10 to May 16, 2021 | 13 | 0-3 | 0.00-30.00  | 0-0 | 0.00-0.00  |
|           | May 17 to May 23, 2021 | 7  | 0-0 | 0.00-0.00   | 0-3 | 0.00-30.00 |
|           | May 24 to May 30, 2021 | 18 | 1-8 | 10.00-80.00 | 0-0 | 0.00-0.00  |

---

**Table A.20: Weekly number of observed and excess/exiguous deaths in Japan and 47 prefectures for senility-related deaths at homes from January 2020 through May 2021.**

| Prefecture | Week                   | Observed | Excess deaths | Percent excess | Exiguous deaths | Percent exiguous |
|------------|------------------------|----------|---------------|----------------|-----------------|------------------|
| Japan      |                        |          |               |                |                 |                  |
|            | Apr 5 to Apr 11, 2021  | 432      | 0–34          | 0.00–8.54      | 0–0             | 0.00–0.00        |
|            | Apr 12 to Apr 18, 2021 | 477      | 24–85         | 6.12–21.68     | 0–0             | 0.00–0.00        |
|            | Apr 19 to Apr 25, 2021 | 503      | 63–124        | 16.62–32.72    | 0–0             | 0.00–0.00        |
|            | Apr 26 to May 2, 2021  | 501      | 71–132        | 19.24–35.77    | 0–0             | 0.00–0.00        |
|            | May 3 to May 9, 2021   | 477      | 51–113        | 14.01–31.04    | 0–0             | 0.00–0.00        |
|            | May 10 to May 16, 2021 | 498      | 78–139        | 21.73–38.72    | 0–0             | 0.00–0.00        |
|            | May 17 to May 23, 2021 | 479      | 67–125        | 18.93–35.31    | 0–0             | 0.00–0.00        |
|            | May 24 to May 30, 2021 | 435      | 17–78         | 4.76–21.85     | 0–0             | 0.00–0.00        |
| Hokkaido   |                        |          |               |                |                 |                  |
|            | Apr 5 to Apr 11, 2021  | 20       | 0–6           | 0.00–42.86     | 0–0             | 0.00–0.00        |
|            | Apr 12 to Apr 18, 2021 | 13       | 0–0           | 0.00–0.00      | 0–1             | 0.00–7.14        |
|            | Apr 19 to Apr 25, 2021 | 17       | 0–3           | 0.00–21.43     | 0–0             | 0.00–0.00        |
|            | Apr 26 to May 2, 2021  | 21       | 0–7           | 0.00–50.00     | 0–0             | 0.00–0.00        |
|            | May 3 to May 9, 2021   | 12       | 0–0           | 0.00–0.00      | 0–2             | 0.00–14.29       |
|            | May 10 to May 16, 2021 | 12       | 0–0           | 0.00–0.00      | 0–2             | 0.00–14.29       |
|            | May 17 to May 23, 2021 | 18       | 0–4           | 0.00–28.57     | 0–0             | 0.00–0.00        |
|            | May 24 to May 30, 2021 | 13       | 0–0           | 0.00–0.00      | 0–2             | 0.00–13.33       |
| Aomori     |                        |          |               |                |                 |                  |
|            | Apr 5 to Apr 11, 2021  | 4        | 0–0           | 0.00–0.00      | 0–1             | 0.00–20.00       |
|            | Apr 12 to Apr 18, 2021 | 2        | 0–0           | 0.00–0.00      | 0–2             | 0.00–50.00       |
|            | Apr 19 to Apr 25, 2021 | 3        | 0–0           | 0.00–0.00      | 0–1             | 0.00–25.00       |
|            | Apr 26 to May 2, 2021  | 2        | 0–0           | 0.00–0.00      | 0–2             | 0.00–50.00       |
|            | May 3 to May 9, 2021   | 6        | 0–1           | 0.00–20.00     | 0–0             | 0.00–0.00        |
|            | May 10 to May 16, 2021 | 7        | 0–2           | 0.00–40.00     | 0–0             | 0.00–0.00        |
|            | May 17 to May 23, 2021 | 7        | 0–2           | 0.00–40.00     | 0–0             | 0.00–0.00        |
|            | May 24 to May 30, 2021 | 2        | 0–0           | 0.00–0.00      | 0–3             | 0.00–60.00       |
| Iwate      |                        |          |               |                |                 |                  |
|            | Apr 5 to Apr 11, 2021  | 7        | 0–3           | 0.00–75.00     | 0–0             | 0.00–0.00        |
|            | Apr 12 to Apr 18, 2021 | 4        | 0–0           | 0.00–0.00      | 0–0             | 0.00–0.00        |
|            | Apr 19 to Apr 25, 2021 | 2        | 0–0           | 0.00–0.00      | 0–2             | 0.00–50.00       |
|            | Apr 26 to May 2, 2021  | 2        | 0–0           | 0.00–0.00      | 0–2             | 0.00–50.00       |
|            | May 3 to May 9, 2021   | 4        | 0–0           | 0.00–0.00      | 0–1             | 0.00–20.00       |
|            | May 10 to May 16, 2021 | 6        | 0–2           | 0.00–50.00     | 0–0             | 0.00–0.00        |
|            | May 17 to May 23, 2021 | 6        | 0–1           | 0.00–20.00     | 0–0             | 0.00–0.00        |
|            | May 24 to May 30, 2021 | 3        | 0–0           | 0.00–0.00      | 0–2             | 0.00–40.00       |
| Miyagi     |                        |          |               |                |                 |                  |
|            | Apr 5 to Apr 11, 2021  | 12       | 0–2           | 0.00–20.00     | 0–0             | 0.00–0.00        |
|            | Apr 12 to Apr 18, 2021 | 15       | 0–5           | 0.00–50.00     | 0–0             | 0.00–0.00        |
|            | Apr 19 to Apr 25, 2021 | 12       | 0–2           | 0.00–20.00     | 0–0             | 0.00–0.00        |
|            | Apr 26 to May 2, 2021  | 7        | 0–0           | 0.00–0.00      | 0–3             | 0.00–30.00       |
|            | May 3 to May 9, 2021   | 9        | 0–0           | 0.00–0.00      | 0–0             | 0.00–0.00        |

|           |                        |    |     |              |     |            |
|-----------|------------------------|----|-----|--------------|-----|------------|
|           | May 10 to May 16, 2021 | 13 | 0-4 | 0.00-44.44   | 0-0 | 0.00-0.00  |
|           | May 17 to May 23, 2021 | 9  | 0-0 | 0.00-0.00    | 0-0 | 0.00-0.00  |
|           | May 24 to May 30, 2021 | 11 | 0-3 | 0.00-37.50   | 0-0 | 0.00-0.00  |
| Akita     |                        |    |     |              |     |            |
|           | Apr 5 to Apr 11, 2021  | 2  | 0-0 | 0.00-0.00    | 0-1 | 0.00-33.33 |
|           | Apr 12 to Apr 18, 2021 | 4  | 0-1 | 0.00-33.33   | 0-0 | 0.00-0.00  |
|           | Apr 19 to Apr 25, 2021 | 3  | 0-0 | 0.00-0.00    | 0-0 | 0.00-0.00  |
|           | Apr 26 to May 2, 2021  | 2  | 0-0 | 0.00-0.00    | 0-1 | 0.00-33.33 |
|           | May 3 to May 9, 2021   | 4  | 0-1 | 0.00-33.33   | 0-0 | 0.00-0.00  |
|           | May 10 to May 16, 2021 | 4  | 0-1 | 0.00-33.33   | 0-0 | 0.00-0.00  |
|           | May 17 to May 23, 2021 | 2  | 0-0 | 0.00-0.00    | 0-1 | 0.00-33.33 |
|           | May 24 to May 30, 2021 | 2  | 0-0 | 0.00-0.00    | 0-1 | 0.00-33.33 |
| Yamagata  |                        |    |     |              |     |            |
|           | Apr 5 to Apr 11, 2021  | 4  | 0-0 | 0.00-0.00    | 0-1 | 0.00-20.00 |
|           | Apr 12 to Apr 18, 2021 | 1  | 0-0 | 0.00-0.00    | 0-4 | 0.00-80.00 |
|           | Apr 19 to Apr 25, 2021 | 7  | 0-2 | 0.00-40.00   | 0-0 | 0.00-0.00  |
|           | Apr 26 to May 2, 2021  | 6  | 0-2 | 0.00-50.00   | 0-0 | 0.00-0.00  |
|           | May 3 to May 9, 2021   | 3  | 0-0 | 0.00-0.00    | 0-1 | 0.00-25.00 |
|           | May 10 to May 16, 2021 | 8  | 0-4 | 0.00-100.00  | 0-0 | 0.00-0.00  |
|           | May 17 to May 23, 2021 | 3  | 0-0 | 0.00-0.00    | 0-1 | 0.00-25.00 |
|           | May 24 to May 30, 2021 | 10 | 2-6 | 50.00-150.00 | 0-0 | 0.00-0.00  |
| Fukushima |                        |    |     |              |     |            |
|           | Apr 5 to Apr 11, 2021  | 12 | 0-2 | 0.00-20.00   | 0-0 | 0.00-0.00  |
|           | Apr 12 to Apr 18, 2021 | 10 | 0-0 | 0.00-0.00    | 0-0 | 0.00-0.00  |
|           | Apr 19 to Apr 25, 2021 | 5  | 0-0 | 0.00-0.00    | 0-4 | 0.00-44.44 |
|           | Apr 26 to May 2, 2021  | 10 | 0-1 | 0.00-11.11   | 0-0 | 0.00-0.00  |
|           | May 3 to May 9, 2021   | 8  | 0-0 | 0.00-0.00    | 0-1 | 0.00-11.11 |
|           | May 10 to May 16, 2021 | 9  | 0-0 | 0.00-0.00    | 0-0 | 0.00-0.00  |
|           | May 17 to May 23, 2021 | 7  | 0-0 | 0.00-0.00    | 0-1 | 0.00-12.50 |
|           | May 24 to May 30, 2021 | 6  | 0-0 | 0.00-0.00    | 0-2 | 0.00-25.00 |
| Ibaraki   |                        |    |     |              |     |            |
|           | Apr 5 to Apr 11, 2021  | 7  | 0-0 | 0.00-0.00    | 0-4 | 0.00-36.36 |
|           | Apr 12 to Apr 18, 2021 | 8  | 0-0 | 0.00-0.00    | 0-3 | 0.00-27.27 |
|           | Apr 19 to Apr 25, 2021 | 11 | 0-1 | 0.00-10.00   | 0-0 | 0.00-0.00  |
|           | Apr 26 to May 2, 2021  | 15 | 0-5 | 0.00-50.00   | 0-0 | 0.00-0.00  |
|           | May 3 to May 9, 2021   | 8  | 0-0 | 0.00-0.00    | 0-1 | 0.00-11.11 |
|           | May 10 to May 16, 2021 | 10 | 0-1 | 0.00-11.11   | 0-0 | 0.00-0.00  |
|           | May 17 to May 23, 2021 | 10 | 0-1 | 0.00-11.11   | 0-0 | 0.00-0.00  |
|           | May 24 to May 30, 2021 | 10 | 0-1 | 0.00-11.11   | 0-0 | 0.00-0.00  |
| Tochigi   |                        |    |     |              |     |            |
|           | Apr 5 to Apr 11, 2021  | 8  | 0-0 | 0.00-0.00    | 0-1 | 0.00-11.11 |
|           | Apr 12 to Apr 18, 2021 | 9  | 0-0 | 0.00-0.00    | 0-0 | 0.00-0.00  |
|           | Apr 19 to Apr 25, 2021 | 14 | 0-5 | 0.00-55.56   | 0-0 | 0.00-0.00  |
|           | Apr 26 to May 2, 2021  | 3  | 0-0 | 0.00-0.00    | 0-5 | 0.00-62.50 |
|           | May 3 to May 9, 2021   | 6  | 0-0 | 0.00-0.00    | 0-2 | 0.00-25.00 |
|           | May 10 to May 16, 2021 | 13 | 0-5 | 0.00-62.50   | 0-0 | 0.00-0.00  |

|          |                        |    |      |             |     |            |
|----------|------------------------|----|------|-------------|-----|------------|
|          | May 17 to May 23, 2021 | 8  | 0-0  | 0.00-0.00   | 0-0 | 0.00-0.00  |
|          | May 24 to May 30, 2021 | 13 | 0-5  | 0.00-62.50  | 0-0 | 0.00-0.00  |
| Gunma    |                        |    |      |             |     |            |
|          | Apr 5 to Apr 11, 2021  | 3  | 0-0  | 0.00-0.00   | 0-4 | 0.00-57.14 |
|          | Apr 12 to Apr 18, 2021 | 11 | 0-4  | 0.00-57.14  | 0-0 | 0.00-0.00  |
|          | Apr 19 to Apr 25, 2021 | 7  | 0-0  | 0.00-0.00   | 0-0 | 0.00-0.00  |
|          | Apr 26 to May 2, 2021  | 7  | 0-1  | 0.00-16.67  | 0-0 | 0.00-0.00  |
|          | May 3 to May 9, 2021   | 7  | 0-1  | 0.00-16.67  | 0-0 | 0.00-0.00  |
|          | May 10 to May 16, 2021 | 4  | 0-0  | 0.00-0.00   | 0-2 | 0.00-33.33 |
|          | May 17 to May 23, 2021 | 6  | 0-0  | 0.00-0.00   | 0-0 | 0.00-0.00  |
|          | May 24 to May 30, 2021 | 5  | 0-0  | 0.00-0.00   | 0-1 | 0.00-16.67 |
| Saitama  |                        |    |      |             |     |            |
|          | Apr 5 to Apr 11, 2021  | 22 | 0-1  | 0.00-4.76   | 0-0 | 0.00-0.00  |
|          | Apr 12 to Apr 18, 2021 | 29 | 0-9  | 0.00-45.00  | 0-0 | 0.00-0.00  |
|          | Apr 19 to Apr 25, 2021 | 24 | 0-4  | 0.00-20.00  | 0-0 | 0.00-0.00  |
|          | Apr 26 to May 2, 2021  | 32 | 3-13 | 15.79-68.42 | 0-0 | 0.00-0.00  |
|          | May 3 to May 9, 2021   | 23 | 0-4  | 0.00-21.05  | 0-0 | 0.00-0.00  |
|          | May 10 to May 16, 2021 | 29 | 0-9  | 0.00-45.00  | 0-0 | 0.00-0.00  |
|          | May 17 to May 23, 2021 | 16 | 0-0  | 0.00-0.00   | 0-3 | 0.00-15.79 |
|          | May 24 to May 30, 2021 | 17 | 0-0  | 0.00-0.00   | 0-2 | 0.00-10.53 |
| Chiba    |                        |    |      |             |     |            |
|          | Apr 5 to Apr 11, 2021  | 17 | 0-0  | 0.00-0.00   | 0-3 | 0.00-15.00 |
|          | Apr 12 to Apr 18, 2021 | 20 | 0-0  | 0.00-0.00   | 0-1 | 0.00-4.76  |
|          | Apr 19 to Apr 25, 2021 | 21 | 0-0  | 0.00-0.00   | 0-0 | 0.00-0.00  |
|          | Apr 26 to May 2, 2021  | 28 | 0-8  | 0.00-40.00  | 0-0 | 0.00-0.00  |
|          | May 3 to May 9, 2021   | 23 | 0-3  | 0.00-15.00  | 0-0 | 0.00-0.00  |
|          | May 10 to May 16, 2021 | 25 | 0-6  | 0.00-31.58  | 0-0 | 0.00-0.00  |
|          | May 17 to May 23, 2021 | 22 | 0-3  | 0.00-15.79  | 0-0 | 0.00-0.00  |
|          | May 24 to May 30, 2021 | 15 | 0-0  | 0.00-0.00   | 0-4 | 0.00-21.05 |
| Tokyo    |                        |    |      |             |     |            |
|          | Apr 5 to Apr 11, 2021  | 48 | 0-0  | 0.00-0.00   | 0-3 | 0.00-5.88  |
|          | Apr 12 to Apr 18, 2021 | 60 | 0-10 | 0.00-20.00  | 0-0 | 0.00-0.00  |
|          | Apr 19 to Apr 25, 2021 | 66 | 3-18 | 6.25-37.50  | 0-0 | 0.00-0.00  |
|          | Apr 26 to May 2, 2021  | 63 | 5-19 | 11.36-43.18 | 0-0 | 0.00-0.00  |
|          | May 3 to May 9, 2021   | 59 | 1-14 | 2.22-31.11  | 0-0 | 0.00-0.00  |
|          | May 10 to May 16, 2021 | 55 | 0-11 | 0.00-25.00  | 0-0 | 0.00-0.00  |
|          | May 17 to May 23, 2021 | 52 | 0-8  | 0.00-18.18  | 0-0 | 0.00-0.00  |
|          | May 24 to May 30, 2021 | 49 | 0-5  | 0.00-11.36  | 0-0 | 0.00-0.00  |
| Kanagawa |                        |    |      |             |     |            |
|          | Apr 5 to Apr 11, 2021  | 46 | 0-3  | 0.00-6.98   | 0-0 | 0.00-0.00  |
|          | Apr 12 to Apr 18, 2021 | 49 | 0-6  | 0.00-13.95  | 0-0 | 0.00-0.00  |
|          | Apr 19 to Apr 25, 2021 | 43 | 0-0  | 0.00-0.00   | 0-1 | 0.00-2.27  |
|          | Apr 26 to May 2, 2021  | 56 | 0-13 | 0.00-30.23  | 0-0 | 0.00-0.00  |
|          | May 3 to May 9, 2021   | 42 | 0-1  | 0.00-2.44   | 0-0 | 0.00-0.00  |
|          | May 10 to May 16, 2021 | 55 | 0-14 | 0.00-34.15  | 0-0 | 0.00-0.00  |
|          | May 17 to May 23, 2021 | 37 | 0-0  | 0.00-0.00   | 0-3 | 0.00-7.50  |

|                        |                        |     |            |               |           |             |
|------------------------|------------------------|-----|------------|---------------|-----------|-------------|
| Niigata                | May 24 to May 30, 2021 | 54  | 1-16       | 2.63-42.11    | 0-0       | 0.00-0.00   |
|                        | Apr 5 to Apr 11, 2021  | 8   | 0-1        | 0.00-14.29    | 0-0       | 0.00-0.00   |
|                        | Apr 12 to Apr 18, 2021 | 6   | 0-0        | 0.00-0.00     | 0-1       | 0.00-14.29  |
|                        | Apr 19 to Apr 25, 2021 | 8   | 0-1        | 0.00-14.29    | 0-0       | 0.00-0.00   |
|                        | Apr 26 to May 2, 2021  | 7   | 0-0        | 0.00-0.00     | 0-0       | 0.00-0.00   |
|                        | May 3 to May 9, 2021   | 12  | 0-5        | 0.00-71.43    | 0-0       | 0.00-0.00   |
|                        | May 10 to May 16, 2021 | 7   | 0-0        | 0.00-0.00     | 0-0       | 0.00-0.00   |
|                        | May 17 to May 23, 2021 | 3   | 0-0        | 0.00-0.00     | 0-4       | 0.00-57.14  |
| May 24 to May 30, 2021 | 9                      | 0-2 | 0.00-28.57 | 0-0           | 0.00-0.00 |             |
| Toyama                 | Apr 5 to Apr 11, 2021  | 1   | 0-0        | 0.00-0.00     | 0-2       | 0.00-66.67  |
|                        | Apr 12 to Apr 18, 2021 | 2   | 0-0        | 0.00-0.00     | 0-1       | 0.00-33.33  |
|                        | Apr 19 to Apr 25, 2021 | 4   | 0-1        | 0.00-33.33    | 0-0       | 0.00-0.00   |
|                        | Apr 26 to May 2, 2021  | 10  | 4-7        | 133.33-233.33 | 0-0       | 0.00-0.00   |
|                        | May 3 to May 9, 2021   | 3   | 0-1        | 0.00-50.00    | 0-0       | 0.00-0.00   |
|                        | May 10 to May 16, 2021 | 3   | 0-1        | 0.00-50.00    | 0-0       | 0.00-0.00   |
|                        | May 17 to May 23, 2021 | 3   | 0-1        | 0.00-50.00    | 0-0       | 0.00-0.00   |
|                        | May 24 to May 30, 2021 | 2   | 0-0        | 0.00-0.00     | 0-1       | 0.00-33.33  |
| Ishikawa               | Apr 5 to Apr 11, 2021  | 2   | 0-0        | 0.00-0.00     | 0-1       | 0.00-33.33  |
|                        | Apr 12 to Apr 18, 2021 | 5   | 0-2        | 0.00-66.67    | 0-0       | 0.00-0.00   |
|                        | Apr 19 to Apr 25, 2021 | 4   | 0-1        | 0.00-33.33    | 0-0       | 0.00-0.00   |
|                        | Apr 26 to May 2, 2021  | 1   | 0-0        | 0.00-0.00     | 0-2       | 0.00-66.67  |
|                        | May 3 to May 9, 2021   | 2   | 0-0        | 0.00-0.00     | 0-1       | 0.00-33.33  |
|                        | May 10 to May 16, 2021 | 3   | 0-0        | 0.00-0.00     | 0-0       | 0.00-0.00   |
|                        | May 17 to May 23, 2021 | 2   | 0-0        | 0.00-0.00     | 0-1       | 0.00-33.33  |
|                        | May 24 to May 30, 2021 | 4   | 0-1        | 0.00-33.33    | 0-0       | 0.00-0.00   |
| Fukui                  | Apr 5 to Apr 11, 2021  | 1   | 0-0        | 0.00-0.00     | 0-2       | 0.00-66.67  |
|                        | Apr 12 to Apr 18, 2021 | 1   | 0-0        | 0.00-0.00     | 0-2       | 0.00-66.67  |
|                        | Apr 19 to Apr 25, 2021 | 4   | 0-1        | 0.00-33.33    | 0-0       | 0.00-0.00   |
|                        | Apr 26 to May 2, 2021  | 2   | 0-0        | 0.00-0.00     | 0-0       | 0.00-0.00   |
|                        | May 3 to May 9, 2021   | 3   | 0-0        | 0.00-0.00     | 0-0       | 0.00-0.00   |
|                        | May 10 to May 16, 2021 | 3   | 0-0        | 0.00-0.00     | 0-0       | 0.00-0.00   |
|                        | May 17 to May 23, 2021 | 0   | 0-0        | 0.00-0.00     | 0-3       | 0.00-100.00 |
|                        | May 24 to May 30, 2021 | 3   | 0-0        | 0.00-0.00     | 0-0       | 0.00-0.00   |
| Yamanashi              | Apr 5 to Apr 11, 2021  | 6   | 0-3        | 0.00-100.00   | 0-0       | 0.00-0.00   |
|                        | Apr 12 to Apr 18, 2021 | 2   | 0-0        | 0.00-0.00     | 0-1       | 0.00-33.33  |
|                        | Apr 19 to Apr 25, 2021 | 2   | 0-0        | 0.00-0.00     | 0-1       | 0.00-33.33  |
|                        | Apr 26 to May 2, 2021  | 6   | 0-3        | 0.00-100.00   | 0-0       | 0.00-0.00   |
|                        | May 3 to May 9, 2021   | 4   | 0-2        | 0.00-100.00   | 0-0       | 0.00-0.00   |
|                        | May 10 to May 16, 2021 | 3   | 0-1        | 0.00-50.00    | 0-0       | 0.00-0.00   |
|                        | May 17 to May 23, 2021 | 4   | 0-2        | 0.00-100.00   | 0-0       | 0.00-0.00   |
|                        | May 24 to May 30, 2021 | 2   | 0-0        | 0.00-0.00     | 0-0       | 0.00-0.00   |

Nagano

|                        |    |      |              |     |            |
|------------------------|----|------|--------------|-----|------------|
| Apr 5 to Apr 11, 2021  | 13 | 0-4  | 0.00-44.44   | 0-0 | 0.00-0.00  |
| Apr 12 to Apr 18, 2021 | 11 | 0-2  | 0.00-22.22   | 0-0 | 0.00-0.00  |
| Apr 19 to Apr 25, 2021 | 12 | 0-3  | 0.00-33.33   | 0-0 | 0.00-0.00  |
| Apr 26 to May 2, 2021  | 18 | 3-9  | 33.33-100.00 | 0-0 | 0.00-0.00  |
| May 3 to May 9, 2021   | 9  | 0-0  | 0.00-0.00    | 0-0 | 0.00-0.00  |
| May 10 to May 16, 2021 | 4  | 0-0  | 0.00-0.00    | 0-4 | 0.00-50.00 |
| May 17 to May 23, 2021 | 19 | 5-11 | 62.50-137.50 | 0-0 | 0.00-0.00  |
| May 24 to May 30, 2021 | 15 | 1-7  | 12.50-87.50  | 0-0 | 0.00-0.00  |

Gifu

|                        |    |     |            |     |            |
|------------------------|----|-----|------------|-----|------------|
| Apr 5 to Apr 11, 2021  | 8  | 0-0 | 0.00-0.00  | 0-0 | 0.00-0.00  |
| Apr 12 to Apr 18, 2021 | 9  | 0-2 | 0.00-28.57 | 0-0 | 0.00-0.00  |
| Apr 19 to Apr 25, 2021 | 11 | 0-4 | 0.00-57.14 | 0-0 | 0.00-0.00  |
| Apr 26 to May 2, 2021  | 9  | 0-2 | 0.00-28.57 | 0-0 | 0.00-0.00  |
| May 3 to May 9, 2021   | 5  | 0-0 | 0.00-0.00  | 0-2 | 0.00-28.57 |
| May 10 to May 16, 2021 | 7  | 0-0 | 0.00-0.00  | 0-0 | 0.00-0.00  |
| May 17 to May 23, 2021 | 9  | 0-2 | 0.00-28.57 | 0-0 | 0.00-0.00  |
| May 24 to May 30, 2021 | 7  | 0-0 | 0.00-0.00  | 0-0 | 0.00-0.00  |

Shizuoka

|                        |    |      |              |     |           |
|------------------------|----|------|--------------|-----|-----------|
| Apr 5 to Apr 11, 2021  | 24 | 0-7  | 0.00-41.18   | 0-0 | 0.00-0.00 |
| Apr 12 to Apr 18, 2021 | 22 | 0-6  | 0.00-37.50   | 0-0 | 0.00-0.00 |
| Apr 19 to Apr 25, 2021 | 25 | 0-9  | 0.00-56.25   | 0-0 | 0.00-0.00 |
| Apr 26 to May 2, 2021  | 23 | 0-7  | 0.00-43.75   | 0-0 | 0.00-0.00 |
| May 3 to May 9, 2021   | 21 | 0-6  | 0.00-40.00   | 0-0 | 0.00-0.00 |
| May 10 to May 16, 2021 | 23 | 0-9  | 0.00-64.29   | 0-0 | 0.00-0.00 |
| May 17 to May 23, 2021 | 29 | 6-15 | 42.86-107.14 | 0-0 | 0.00-0.00 |
| May 24 to May 30, 2021 | 19 | 0-4  | 0.00-26.67   | 0-0 | 0.00-0.00 |

Aichi

|                        |    |      |            |     |           |
|------------------------|----|------|------------|-----|-----------|
| Apr 5 to Apr 11, 2021  | 20 | 0-0  | 0.00-0.00  | 0-2 | 0.00-9.09 |
| Apr 12 to Apr 18, 2021 | 25 | 0-3  | 0.00-13.64 | 0-0 | 0.00-0.00 |
| Apr 19 to Apr 25, 2021 | 33 | 2-11 | 9.09-50.00 | 0-0 | 0.00-0.00 |
| Apr 26 to May 2, 2021  | 21 | 0-0  | 0.00-0.00  | 0-0 | 0.00-0.00 |
| May 3 to May 9, 2021   | 26 | 0-5  | 0.00-23.81 | 0-0 | 0.00-0.00 |
| May 10 to May 16, 2021 | 23 | 0-2  | 0.00-9.52  | 0-0 | 0.00-0.00 |
| May 17 to May 23, 2021 | 27 | 0-7  | 0.00-35.00 | 0-0 | 0.00-0.00 |
| May 24 to May 30, 2021 | 22 | 0-3  | 0.00-15.79 | 0-0 | 0.00-0.00 |

Mie

|                        |    |     |              |     |            |
|------------------------|----|-----|--------------|-----|------------|
| Apr 5 to Apr 11, 2021  | 5  | 0-0 | 0.00-0.00    | 0-2 | 0.00-28.57 |
| Apr 12 to Apr 18, 2021 | 7  | 0-0 | 0.00-0.00    | 0-0 | 0.00-0.00  |
| Apr 19 to Apr 25, 2021 | 8  | 0-1 | 0.00-14.29   | 0-0 | 0.00-0.00  |
| Apr 26 to May 2, 2021  | 8  | 0-1 | 0.00-14.29   | 0-0 | 0.00-0.00  |
| May 3 to May 9, 2021   | 10 | 0-3 | 0.00-42.86   | 0-0 | 0.00-0.00  |
| May 10 to May 16, 2021 | 14 | 1-7 | 14.29-100.00 | 0-0 | 0.00-0.00  |
| May 17 to May 23, 2021 | 11 | 0-4 | 0.00-57.14   | 0-0 | 0.00-0.00  |
| May 24 to May 30, 2021 | 7  | 0-0 | 0.00-0.00    | 0-0 | 0.00-0.00  |

Shiga

|          |                        |    |      |              |     |            |
|----------|------------------------|----|------|--------------|-----|------------|
|          | Apr 5 to Apr 11, 2021  | 4  | 0-0  | 0.00-0.00    | 0-0 | 0.00-0.00  |
|          | Apr 12 to Apr 18, 2021 | 4  | 0-0  | 0.00-0.00    | 0-0 | 0.00-0.00  |
|          | Apr 19 to Apr 25, 2021 | 6  | 0-2  | 0.00-50.00   | 0-0 | 0.00-0.00  |
|          | Apr 26 to May 2, 2021  | 4  | 0-0  | 0.00-0.00    | 0-0 | 0.00-0.00  |
|          | May 3 to May 9, 2021   | 6  | 0-2  | 0.00-50.00   | 0-0 | 0.00-0.00  |
|          | May 10 to May 16, 2021 | 5  | 0-1  | 0.00-25.00   | 0-0 | 0.00-0.00  |
|          | May 17 to May 23, 2021 | 4  | 0-0  | 0.00-0.00    | 0-0 | 0.00-0.00  |
|          | May 24 to May 30, 2021 | 6  | 0-2  | 0.00-50.00   | 0-0 | 0.00-0.00  |
| Kyoto    |                        |    |      |              |     |            |
|          | Apr 5 to Apr 11, 2021  | 12 | 0-4  | 0.00-50.00   | 0-0 | 0.00-0.00  |
|          | Apr 12 to Apr 18, 2021 | 11 | 0-3  | 0.00-37.50   | 0-0 | 0.00-0.00  |
|          | Apr 19 to Apr 25, 2021 | 13 | 0-5  | 0.00-62.50   | 0-0 | 0.00-0.00  |
|          | Apr 26 to May 2, 2021  | 13 | 0-6  | 0.00-85.71   | 0-0 | 0.00-0.00  |
|          | May 3 to May 9, 2021   | 14 | 1-7  | 14.29-100.00 | 0-0 | 0.00-0.00  |
|          | May 10 to May 16, 2021 | 9  | 0-2  | 0.00-28.57   | 0-0 | 0.00-0.00  |
|          | May 17 to May 23, 2021 | 11 | 0-4  | 0.00-57.14   | 0-0 | 0.00-0.00  |
|          | May 24 to May 30, 2021 | 4  | 0-0  | 0.00-0.00    | 0-3 | 0.00-42.86 |
| Osaka    |                        |    |      |              |     |            |
|          | Apr 5 to Apr 11, 2021  | 17 | 0-0  | 0.00-0.00    | 0-5 | 0.00-22.73 |
|          | Apr 12 to Apr 18, 2021 | 28 | 0-7  | 0.00-33.33   | 0-0 | 0.00-0.00  |
|          | Apr 19 to Apr 25, 2021 | 27 | 0-6  | 0.00-28.57   | 0-0 | 0.00-0.00  |
|          | Apr 26 to May 2, 2021  | 29 | 0-9  | 0.00-45.00   | 0-0 | 0.00-0.00  |
|          | May 3 to May 9, 2021   | 31 | 2-12 | 10.53-63.16  | 0-0 | 0.00-0.00  |
|          | May 10 to May 16, 2021 | 33 | 4-14 | 21.05-73.68  | 0-0 | 0.00-0.00  |
|          | May 17 to May 23, 2021 | 30 | 0-10 | 0.00-50.00   | 0-0 | 0.00-0.00  |
|          | May 24 to May 30, 2021 | 25 | 0-5  | 0.00-25.00   | 0-0 | 0.00-0.00  |
| Hyogo    |                        |    |      |              |     |            |
|          | Apr 5 to Apr 11, 2021  | 31 | 4-13 | 22.22-72.22  | 0-0 | 0.00-0.00  |
|          | Apr 12 to Apr 18, 2021 | 31 | 5-13 | 27.78-72.22  | 0-0 | 0.00-0.00  |
|          | Apr 19 to Apr 25, 2021 | 27 | 2-10 | 11.76-58.82  | 0-0 | 0.00-0.00  |
|          | Apr 26 to May 2, 2021  | 25 | 0-8  | 0.00-47.06   | 0-0 | 0.00-0.00  |
|          | May 3 to May 9, 2021   | 26 | 1-10 | 6.25-62.50   | 0-0 | 0.00-0.00  |
|          | May 10 to May 16, 2021 | 25 | 0-9  | 0.00-56.25   | 0-0 | 0.00-0.00  |
|          | May 17 to May 23, 2021 | 30 | 5-14 | 31.25-87.50  | 0-0 | 0.00-0.00  |
|          | May 24 to May 30, 2021 | 28 | 4-12 | 25.00-75.00  | 0-0 | 0.00-0.00  |
| Nara     |                        |    |      |              |     |            |
|          | Apr 5 to Apr 11, 2021  | 6  | 0-1  | 0.00-20.00   | 0-0 | 0.00-0.00  |
|          | Apr 12 to Apr 18, 2021 | 3  | 0-0  | 0.00-0.00    | 0-2 | 0.00-40.00 |
|          | Apr 19 to Apr 25, 2021 | 7  | 0-2  | 0.00-40.00   | 0-0 | 0.00-0.00  |
|          | Apr 26 to May 2, 2021  | 5  | 0-0  | 0.00-0.00    | 0-0 | 0.00-0.00  |
|          | May 3 to May 9, 2021   | 4  | 0-0  | 0.00-0.00    | 0-0 | 0.00-0.00  |
|          | May 10 to May 16, 2021 | 7  | 0-2  | 0.00-40.00   | 0-0 | 0.00-0.00  |
|          | May 17 to May 23, 2021 | 8  | 0-4  | 0.00-100.00  | 0-0 | 0.00-0.00  |
|          | May 24 to May 30, 2021 | 6  | 0-2  | 0.00-50.00   | 0-0 | 0.00-0.00  |
| Wakayama |                        |    |      |              |     |            |
|          | Apr 5 to Apr 11, 2021  | 3  | 0-0  | 0.00-0.00    | 0-1 | 0.00-25.00 |



|           |                        |    |     |              |     |             |
|-----------|------------------------|----|-----|--------------|-----|-------------|
|           | Apr 12 to Apr 18, 2021 | 4  | 0-0 | 0.00-0.00    | 0-0 | 0.00-0.00   |
|           | Apr 19 to Apr 25, 2021 | 4  | 0-1 | 0.00-33.33   | 0-0 | 0.00-0.00   |
|           | Apr 26 to May 2, 2021  | 2  | 0-0 | 0.00-0.00    | 0-1 | 0.00-33.33  |
|           | May 3 to May 9, 2021   | 5  | 0-1 | 0.00-25.00   | 0-0 | 0.00-0.00   |
|           | May 10 to May 16, 2021 | 8  | 1-5 | 33.33-166.67 | 0-0 | 0.00-0.00   |
|           | May 17 to May 23, 2021 | 5  | 0-1 | 0.00-25.00   | 0-0 | 0.00-0.00   |
|           | May 24 to May 30, 2021 | 2  | 0-0 | 0.00-0.00    | 0-2 | 0.00-50.00  |
| Tottori   |                        |    |     |              |     |             |
|           | Apr 5 to Apr 11, 2021  | 2  | 0-0 | 0.00-0.00    | 0-1 | 0.00-33.33  |
|           | Apr 12 to Apr 18, 2021 | 3  | 0-1 | 0.00-50.00   | 0-0 | 0.00-0.00   |
|           | Apr 19 to Apr 25, 2021 | 2  | 0-0 | 0.00-0.00    | 0-0 | 0.00-0.00   |
|           | Apr 26 to May 2, 2021  | 0  | 0-0 | 0.00-0.00    | 0-2 | 0.00-100.00 |
|           | May 3 to May 9, 2021   | 3  | 0-1 | 0.00-50.00   | 0-0 | 0.00-0.00   |
|           | May 10 to May 16, 2021 | 4  | 0-2 | 0.00-100.00  | 0-0 | 0.00-0.00   |
|           | May 17 to May 23, 2021 | 3  | 0-1 | 0.00-50.00   | 0-0 | 0.00-0.00   |
|           | May 24 to May 30, 2021 | 2  | 0-0 | 0.00-0.00    | 0-0 | 0.00-0.00   |
| Shimane   |                        |    |     |              |     |             |
|           | Apr 5 to Apr 11, 2021  | 2  | 0-0 | 0.00-0.00    | 0-1 | 0.00-33.33  |
|           | Apr 12 to Apr 18, 2021 | 4  | 0-1 | 0.00-33.33   | 0-0 | 0.00-0.00   |
|           | Apr 19 to Apr 25, 2021 | 1  | 0-0 | 0.00-0.00    | 0-1 | 0.00-50.00  |
|           | Apr 26 to May 2, 2021  | 0  | 0-0 | 0.00-0.00    | 0-2 | 0.00-100.00 |
|           | May 3 to May 9, 2021   | 4  | 0-2 | 0.00-100.00  | 0-0 | 0.00-0.00   |
|           | May 10 to May 16, 2021 | 5  | 0-3 | 0.00-150.00  | 0-0 | 0.00-0.00   |
|           | May 17 to May 23, 2021 | 4  | 0-2 | 0.00-100.00  | 0-0 | 0.00-0.00   |
|           | May 24 to May 30, 2021 | 1  | 0-0 | 0.00-0.00    | 0-1 | 0.00-50.00  |
| Okayama   |                        |    |     |              |     |             |
|           | Apr 5 to Apr 11, 2021  | 8  | 0-4 | 0.00-100.00  | 0-0 | 0.00-0.00   |
|           | Apr 12 to Apr 18, 2021 | 7  | 0-3 | 0.00-75.00   | 0-0 | 0.00-0.00   |
|           | Apr 19 to Apr 25, 2021 | 4  | 0-0 | 0.00-0.00    | 0-0 | 0.00-0.00   |
|           | Apr 26 to May 2, 2021  | 4  | 0-0 | 0.00-0.00    | 0-0 | 0.00-0.00   |
|           | May 3 to May 9, 2021   | 7  | 0-3 | 0.00-75.00   | 0-0 | 0.00-0.00   |
|           | May 10 to May 16, 2021 | 4  | 0-0 | 0.00-0.00    | 0-0 | 0.00-0.00   |
|           | May 17 to May 23, 2021 | 6  | 0-2 | 0.00-50.00   | 0-0 | 0.00-0.00   |
|           | May 24 to May 30, 2021 | 9  | 1-5 | 25.00-125.00 | 0-0 | 0.00-0.00   |
| Hiroshima |                        |    |     |              |     |             |
|           | Apr 5 to Apr 11, 2021  | 7  | 0-0 | 0.00-0.00    | 0-0 | 0.00-0.00   |
|           | Apr 12 to Apr 18, 2021 | 5  | 0-0 | 0.00-0.00    | 0-1 | 0.00-16.67  |
|           | Apr 19 to Apr 25, 2021 | 4  | 0-0 | 0.00-0.00    | 0-2 | 0.00-33.33  |
|           | Apr 26 to May 2, 2021  | 7  | 0-1 | 0.00-16.67   | 0-0 | 0.00-0.00   |
|           | May 3 to May 9, 2021   | 11 | 0-5 | 0.00-83.33   | 0-0 | 0.00-0.00   |
|           | May 10 to May 16, 2021 | 6  | 0-0 | 0.00-0.00    | 0-0 | 0.00-0.00   |
|           | May 17 to May 23, 2021 | 7  | 0-1 | 0.00-16.67   | 0-0 | 0.00-0.00   |
|           | May 24 to May 30, 2021 | 5  | 0-0 | 0.00-0.00    | 0-1 | 0.00-16.67  |
| Yamaguchi |                        |    |     |              |     |             |
|           | Apr 5 to Apr 11, 2021  | 1  | 0-0 | 0.00-0.00    | 0-3 | 0.00-75.00  |
|           | Apr 12 to Apr 18, 2021 | 2  | 0-0 | 0.00-0.00    | 0-2 | 0.00-50.00  |

|           |                        |    |     |               |     |             |
|-----------|------------------------|----|-----|---------------|-----|-------------|
|           | Apr 19 to Apr 25, 2021 | 5  | 0-1 | 0.00-25.00    | 0-0 | 0.00-0.00   |
|           | Apr 26 to May 2, 2021  | 3  | 0-0 | 0.00-0.00     | 0-1 | 0.00-25.00  |
|           | May 3 to May 9, 2021   | 3  | 0-0 | 0.00-0.00     | 0-0 | 0.00-0.00   |
|           | May 10 to May 16, 2021 | 1  | 0-0 | 0.00-0.00     | 0-2 | 0.00-66.67  |
|           | May 17 to May 23, 2021 | 6  | 0-3 | 0.00-100.00   | 0-0 | 0.00-0.00   |
|           | May 24 to May 30, 2021 | 1  | 0-0 | 0.00-0.00     | 0-2 | 0.00-66.67  |
| Tokushima |                        |    |     |               |     |             |
|           | Apr 5 to Apr 11, 2021  | 1  | 0-0 | 0.00-0.00     | 0-1 | 0.00-50.00  |
|           | Apr 12 to Apr 18, 2021 | 3  | 0-1 | 0.00-50.00    | 0-0 | 0.00-0.00   |
|           | Apr 19 to Apr 25, 2021 | 1  | 0-0 | 0.00-0.00     | 0-1 | 0.00-50.00  |
|           | Apr 26 to May 2, 2021  | 2  | 0-0 | 0.00-0.00     | 0-0 | 0.00-0.00   |
|           | May 3 to May 9, 2021   | 1  | 0-0 | 0.00-0.00     | 0-1 | 0.00-50.00  |
|           | May 10 to May 16, 2021 | 2  | 0-0 | 0.00-0.00     | 0-0 | 0.00-0.00   |
|           | May 17 to May 23, 2021 | 2  | 0-0 | 0.00-0.00     | 0-0 | 0.00-0.00   |
|           | May 24 to May 30, 2021 | 0  | 0-0 | 0.00-0.00     | 0-2 | 0.00-100.00 |
| Kagawa    |                        |    |     |               |     |             |
|           | Apr 5 to Apr 11, 2021  | 2  | 0-0 | 0.00-0.00     | 0-2 | 0.00-50.00  |
|           | Apr 12 to Apr 18, 2021 | 5  | 0-0 | 0.00-0.00     | 0-0 | 0.00-0.00   |
|           | Apr 19 to Apr 25, 2021 | 6  | 0-2 | 0.00-50.00    | 0-0 | 0.00-0.00   |
|           | Apr 26 to May 2, 2021  | 6  | 0-2 | 0.00-50.00    | 0-0 | 0.00-0.00   |
|           | May 3 to May 9, 2021   | 3  | 0-0 | 0.00-0.00     | 0-1 | 0.00-25.00  |
|           | May 10 to May 16, 2021 | 3  | 0-0 | 0.00-0.00     | 0-1 | 0.00-25.00  |
|           | May 17 to May 23, 2021 | 8  | 0-4 | 0.00-100.00   | 0-0 | 0.00-0.00   |
|           | May 24 to May 30, 2021 | 3  | 0-0 | 0.00-0.00     | 0-1 | 0.00-25.00  |
| Ehime     |                        |    |     |               |     |             |
|           | Apr 5 to Apr 11, 2021  | 6  | 0-0 | 0.00-0.00     | 0-2 | 0.00-25.00  |
|           | Apr 12 to Apr 18, 2021 | 8  | 0-1 | 0.00-14.29    | 0-0 | 0.00-0.00   |
|           | Apr 19 to Apr 25, 2021 | 8  | 0-1 | 0.00-14.29    | 0-0 | 0.00-0.00   |
|           | Apr 26 to May 2, 2021  | 10 | 0-3 | 0.00-42.86    | 0-0 | 0.00-0.00   |
|           | May 3 to May 9, 2021   | 11 | 0-4 | 0.00-57.14    | 0-0 | 0.00-0.00   |
|           | May 10 to May 16, 2021 | 7  | 0-0 | 0.00-0.00     | 0-0 | 0.00-0.00   |
|           | May 17 to May 23, 2021 | 5  | 0-0 | 0.00-0.00     | 0-2 | 0.00-28.57  |
|           | May 24 to May 30, 2021 | 9  | 0-2 | 0.00-28.57    | 0-0 | 0.00-0.00   |
| Kochi     |                        |    |     |               |     |             |
|           | Apr 5 to Apr 11, 2021  | 2  | 0-1 | 0.00-100.00   | 0-0 | 0.00-0.00   |
|           | Apr 12 to Apr 18, 2021 | 0  | 0-0 | 0.00-0.00     | 0-1 | 0.00-100.00 |
|           | Apr 19 to Apr 25, 2021 | 5  | 1-4 | 100.00-400.00 | 0-0 | 0.00-0.00   |
|           | Apr 26 to May 2, 2021  | 0  | 0-0 | 0.00-0.00     | 0-1 | 0.00-100.00 |
|           | May 3 to May 9, 2021   | 3  | 0-2 | 0.00-200.00   | 0-0 | 0.00-0.00   |
|           | May 10 to May 16, 2021 | 0  | 0-0 | 0.00-0.00     | 0-1 | 0.00-100.00 |
|           | May 17 to May 23, 2021 | 0  | NA  | NA            | NA  | NA          |
|           | May 24 to May 30, 2021 | 1  | NA  | NA            | NA  | NA          |
| Fukuoka   |                        |    |     |               |     |             |
|           | Apr 5 to Apr 11, 2021  | 7  | 0-0 | 0.00-0.00     | 0-2 | 0.00-22.22  |
|           | Apr 12 to Apr 18, 2021 | 8  | 0-0 | 0.00-0.00     | 0-1 | 0.00-11.11  |
|           | Apr 19 to Apr 25, 2021 | 10 | 0-2 | 0.00-25.00    | 0-0 | 0.00-0.00   |

|          |                        |    |     |              |     |             |
|----------|------------------------|----|-----|--------------|-----|-------------|
|          | Apr 26 to May 2, 2021  | 14 | 0-6 | 0.00-75.00   | 0-0 | 0.00-0.00   |
|          | May 3 to May 9, 2021   | 11 | 0-3 | 0.00-37.50   | 0-0 | 0.00-0.00   |
|          | May 10 to May 16, 2021 | 16 | 2-8 | 25.00-100.00 | 0-0 | 0.00-0.00   |
|          | May 17 to May 23, 2021 | 12 | 0-4 | 0.00-50.00   | 0-0 | 0.00-0.00   |
|          | May 24 to May 30, 2021 | 7  | 0-0 | 0.00-0.00    | 0-1 | 0.00-12.50  |
| Saga     |                        |    |     |              |     |             |
|          | Apr 5 to Apr 11, 2021  | 4  | 0-1 | 0.00-33.33   | 0-0 | 0.00-0.00   |
|          | Apr 12 to Apr 18, 2021 | 4  | 0-1 | 0.00-33.33   | 0-0 | 0.00-0.00   |
|          | Apr 19 to Apr 25, 2021 | 1  | 0-0 | 0.00-0.00    | 0-2 | 0.00-66.67  |
|          | Apr 26 to May 2, 2021  | 1  | 0-0 | 0.00-0.00    | 0-2 | 0.00-66.67  |
|          | May 3 to May 9, 2021   | 1  | 0-0 | 0.00-0.00    | 0-2 | 0.00-66.67  |
|          | May 10 to May 16, 2021 | 0  | NA  | NA           | NA  | NA          |
|          | May 17 to May 23, 2021 | 3  | 0-0 | 0.00-0.00    | 0-0 | 0.00-0.00   |
|          | May 24 to May 30, 2021 | 3  | 0-0 | 0.00-0.00    | 0-0 | 0.00-0.00   |
| Nagasaki |                        |    |     |              |     |             |
|          | Apr 5 to Apr 11, 2021  | 3  | 0-0 | 0.00-0.00    | 0-1 | 0.00-25.00  |
|          | Apr 12 to Apr 18, 2021 | 2  | 0-0 | 0.00-0.00    | 0-2 | 0.00-50.00  |
|          | Apr 19 to Apr 25, 2021 | 6  | 0-2 | 0.00-50.00   | 0-0 | 0.00-0.00   |
|          | Apr 26 to May 2, 2021  | 3  | 0-0 | 0.00-0.00    | 0-1 | 0.00-25.00  |
|          | May 3 to May 9, 2021   | 6  | 0-2 | 0.00-50.00   | 0-0 | 0.00-0.00   |
|          | May 10 to May 16, 2021 | 2  | 0-0 | 0.00-0.00    | 0-3 | 0.00-60.00  |
|          | May 17 to May 23, 2021 | 4  | 0-0 | 0.00-0.00    | 0-1 | 0.00-20.00  |
|          | May 24 to May 30, 2021 | 4  | 0-0 | 0.00-0.00    | 0-0 | 0.00-0.00   |
| Kumamoto |                        |    |     |              |     |             |
|          | Apr 5 to Apr 11, 2021  | 3  | 0-0 | 0.00-0.00    | 0-2 | 0.00-40.00  |
|          | Apr 12 to Apr 18, 2021 | 7  | 0-2 | 0.00-40.00   | 0-0 | 0.00-0.00   |
|          | Apr 19 to Apr 25, 2021 | 5  | 0-0 | 0.00-0.00    | 0-0 | 0.00-0.00   |
|          | Apr 26 to May 2, 2021  | 3  | 0-0 | 0.00-0.00    | 0-2 | 0.00-40.00  |
|          | May 3 to May 9, 2021   | 5  | 0-0 | 0.00-0.00    | 0-0 | 0.00-0.00   |
|          | May 10 to May 16, 2021 | 4  | 0-0 | 0.00-0.00    | 0-1 | 0.00-20.00  |
|          | May 17 to May 23, 2021 | 5  | 0-0 | 0.00-0.00    | 0-0 | 0.00-0.00   |
|          | May 24 to May 30, 2021 | 5  | 0-0 | 0.00-0.00    | 0-0 | 0.00-0.00   |
| Oita     |                        |    |     |              |     |             |
|          | Apr 5 to Apr 11, 2021  | 1  | 0-0 | 0.00-0.00    | 0-2 | 0.00-66.67  |
|          | Apr 12 to Apr 18, 2021 | 3  | 0-0 | 0.00-0.00    | 0-0 | 0.00-0.00   |
|          | Apr 19 to Apr 25, 2021 | 3  | 0-1 | 0.00-50.00   | 0-0 | 0.00-0.00   |
|          | Apr 26 to May 2, 2021  | 0  | 0-0 | 0.00-0.00    | 0-2 | 0.00-100.00 |
|          | May 3 to May 9, 2021   | 4  | 0-2 | 0.00-100.00  | 0-0 | 0.00-0.00   |
|          | May 10 to May 16, 2021 | 5  | 0-3 | 0.00-150.00  | 0-0 | 0.00-0.00   |
|          | May 17 to May 23, 2021 | 3  | 0-1 | 0.00-50.00   | 0-0 | 0.00-0.00   |
|          | May 24 to May 30, 2021 | 2  | 0-0 | 0.00-0.00    | 0-0 | 0.00-0.00   |
| Miyazaki |                        |    |     |              |     |             |
|          | Apr 5 to Apr 11, 2021  | 4  | 0-1 | 0.00-33.33   | 0-0 | 0.00-0.00   |
|          | Apr 12 to Apr 18, 2021 | 2  | 0-0 | 0.00-0.00    | 0-1 | 0.00-33.33  |
|          | Apr 19 to Apr 25, 2021 | 0  | 0-0 | 0.00-0.00    | 0-2 | 0.00-100.00 |
|          | Apr 26 to May 2, 2021  | 4  | 0-2 | 0.00-100.00  | 0-0 | 0.00-0.00   |

|           |                        |     |      |             |     |            |
|-----------|------------------------|-----|------|-------------|-----|------------|
|           | May 3 to May 9, 2021   | 2   | 0-0  | 0.00-0.00   | 0-0 | 0.00-0.00  |
|           | May 10 to May 16, 2021 | 5   | 0-3  | 0.00-150.00 | 0-0 | 0.00-0.00  |
|           | May 17 to May 23, 2021 | 2   | 0-0  | 0.00-0.00   | 0-0 | 0.00-0.00  |
|           | May 24 to May 30, 2021 | 3   | 0-1  | 0.00-50.00  | 0-0 | 0.00-0.00  |
| Kagoshima |                        |     |      |             |     |            |
|           | Apr 5 to Apr 11, 2021  | 5   | 0-0  | 0.00-0.00   | 0-0 | 0.00-0.00  |
|           | Apr 12 to Apr 18, 2021 | 5   | 0-0  | 0.00-0.00   | 0-0 | 0.00-0.00  |
|           | Apr 19 to Apr 25, 2021 | 5   | 0-0  | 0.00-0.00   | 0-0 | 0.00-0.00  |
|           | Apr 26 to May 2, 2021  | 2   | 0-0  | 0.00-0.00   | 0-3 | 0.00-60.00 |
|           | May 3 to May 9, 2021   | 4   | 0-0  | 0.00-0.00   | 0-1 | 0.00-20.00 |
|           | May 10 to May 16, 2021 | 3   | 0-0  | 0.00-0.00   | 0-3 | 0.00-50.00 |
|           | May 17 to May 23, 2021 | 5   | 0-0  | 0.00-0.00   | 0-1 | 0.00-16.67 |
|           | May 24 to May 30, 2021 | 4   | 0-0  | 0.00-0.00   | 0-2 | 0.00-33.33 |
| Okinawa   |                        |     |      |             |     |            |
|           | Apr 5 to Apr 11, 2021  | 1   | 0-0  | 0.00-0.00   | 0-2 | 0.00-66.67 |
|           | Apr 12 to Apr 18, 2021 | 3   | 0-0  | 0.00-0.00   | 0-0 | 0.00-0.00  |
|           | Apr 19 to Apr 25, 2021 | 7   | 0-4  | 0.00-133.33 | 0-0 | 0.00-0.00  |
|           | Apr 26 to May 2, 2021  | 5   | 0-3  | 0.00-150.00 | 0-0 | 0.00-0.00  |
|           | May 3 to May 9, 2021   | 3   | 0-1  | 0.00-50.00  | 0-0 | 0.00-0.00  |
|           | May 10 to May 16, 2021 | 4   | 0-2  | 0.00-100.00 | 0-0 | 0.00-0.00  |
|           | May 17 to May 23, 2021 | 6   | 0-4  | 0.00-200.00 | 0-0 | 0.00-0.00  |
|           | May 24 to May 30, 2021 | 178 | 0-13 | 0.00-7.88   | 0-0 | 0.00-0.00  |

---
